# Supplementary material for: The quality of prison primary care: cross-sectional cluster-level analyses of prison healthcare data in the North of England
Source: PubMed Central journal article supplement (PMC10484963; doi:10.1016/j.eclinm.2023.102171), 2023-08-31
Supplement: mmc1.pdf [file mmc1.pdf]

## **Table of Contents of Supplementary Sections**

|                                                                                                                             |               |
|-----------------------------------------------------------------------------------------------------------------------------|---------------|
| Supplementary Section 1. Summaries of Multi-level mixed effects logistic models of indicator achievement by domains of care | Pages 2-17    |
| Supplementary Section 2: Descriptive statistics for each indicator                                                          | Pages 18-127  |
| Supplementary Section 3: Multi-level mixed effects logistic regression model results for each indicator                     | Pages 128-164 |
| Supplementary Section 4. Comparisons with achievement in community settings                                                 | Pages 165-168 |

Supplementary Section 1. Summaries of Multi-level mixed effects logistic models of indicator achievement by domains of care

Table 2a. Long-term conditions

| Indicator                                                                                                                                                                                                                                                                                                            | Achievement                        |                                          | Variation in ORs between prisons (range of ORs) | Association between explanatory variables and achievement (OR; 95% CI) |                           |                                         |       |                                           |                          |                                                                |                        |                                                     |                                        |
|----------------------------------------------------------------------------------------------------------------------------------------------------------------------------------------------------------------------------------------------------------------------------------------------------------------------|------------------------------------|------------------------------------------|-------------------------------------------------|------------------------------------------------------------------------|---------------------------|-----------------------------------------|-------|-------------------------------------------|--------------------------|----------------------------------------------------------------|------------------------|-----------------------------------------------------|----------------------------------------|
|                                                                                                                                                                                                                                                                                                                      | 2019-20 (%)                        | 2019-20 compared to 2017-18 (OR; 95% CI) |                                                 | Prison category <sup>1</sup> (comparator category A)                   |                           | Gender <sup>2</sup> (comparator female) |       | Age <sup>2</sup> (comparator 30-39 years) |                          | Length of stay (months) <sup>2</sup> (comparator 1- <6 months) |                        | Ethnic group <sup>2</sup> (comparator White people) |                                        |
|                                                                                                                                                                                                                                                                                                                      |                                    |                                          |                                                 | Higher                                                                 | Lower                     | Higher                                  | Lower | Higher                                    | Lower                    | Higher                                                         | Lower                  | Higher                                              | Lower                                  |
| Blood pressure control in diabetes: proportion of the prison population with diabetes whose most recent blood pressure was ≤ 140/80 mmHg in the last 12 months                                                                                                                                                       | 261 of 770 eligible people (33.9%) | No change (1.17; 0.9, 1.51)              | 3.6-fold (0.95 to 3.42)                         | C (1.94; 1.47, 2.57)                                                   | ..                        | ..                                      | ..    | 20-29 (2.82; 1.86526, 4.3)                | ..                       | > 24 (1.95; 1.34, 2.85)                                        | ..                     | ..                                                  | Asian/Asian British (0.58; 0.36, 0.95) |
| Processes of care for diabetes: proportion of the prison population with diabetes who have had ≥ five of these measurements in the preceding 12 months: body mass index, blood pressure, record of smoking status, foot examination, urine albumin: creatinine ratio, blood tests for HbA1c, cholesterol, creatinine | 426 of 770 eligible people (55.3%) | Increase (1.51; 1.15, 1.99)              | 5.7-fold (0.78 to 4.46)                         | ..                                                                     | B (0.10; 0.07, 0.13)      | ..                                      | ..    | 50-59 (1.76; 1.23, 2.54)                  | ..                       | 6-12 (2.29; 1.65, 3.19)                                        | < 1 (0.38; 0.25, 0.58) | ..                                                  | ..                                     |
| Glycaemic control for diabetes: proportion of the prison population with diabetes and without moderate or severe frailty, whose most recent HbA1c was ≤ 58 mmol/mol in the last 12 months                                                                                                                            | 260 of 756 eligible people (34.4%) | No change (1.15; 0.88, 1.51)             | 7-fold (0.34 to 2.39)                           | ..                                                                     | B (0.36; 0.28, 0.47)      | ..                                      | ..    | ..                                        | 20-29 (0.31; 0.16, 0.58) | 6-12 (2.58; 1.83, 3.64)                                        | < 1 (0.21; 0.12, 0.38) | Black/Black British (3.08; 1.6, 5.91)               | ..                                     |
|                                                                                                                                                                                                                                                                                                                      |                                    |                                          |                                                 |                                                                        | Closed (2.94; 2.05, 4.22) |                                         |       | 80-89 (2.15; 1.00321, 4.6)                |                          |                                                                |                        |                                                     |                                        |
|                                                                                                                                                                                                                                                                                                                      |                                    |                                          |                                                 |                                                                        | D (1.61; 1.14, 2.27)      |                                         |       | (comparator 50-59 years)                  |                          |                                                                |                        |                                                     |                                        |

| Indicator                                                                                                                                                                                      | Achievement                                    |                                          | Variation in ORs between prisons (range of ORs) | Association between explanatory variables and achievement (OR; 95% CI) |             |                                         |       |                                           |                         |                                                                |                        |                                                     |                                        |  |                                  |  |  |  |  |  |  |  |    |
|------------------------------------------------------------------------------------------------------------------------------------------------------------------------------------------------|------------------------------------------------|------------------------------------------|-------------------------------------------------|------------------------------------------------------------------------|-------------|-----------------------------------------|-------|-------------------------------------------|-------------------------|----------------------------------------------------------------|------------------------|-----------------------------------------------------|----------------------------------------|--|----------------------------------|--|--|--|--|--|--|--|----|
|                                                                                                                                                                                                | 2019-20 (%)                                    | 2019-20 compared to 2017-18 (OR; 95% CI) |                                                 | Prison category <sup>1</sup> (comparator category A)                   |             | Gender <sup>2</sup> (comparator female) |       | Age <sup>2</sup> (comparator 30-39 years) |                         | Length of stay (months) <sup>2</sup> (comparator 1- <6 months) |                        | Ethnic group <sup>2</sup> (comparator White people) |                                        |  |                                  |  |  |  |  |  |  |  |    |
|                                                                                                                                                                                                |                                                |                                          |                                                 | Higher                                                                 | Lower       | Higher                                  | Lower | Higher                                    | Lower                   | Higher                                                         | Lower                  | Higher                                              | Lower                                  |  |                                  |  |  |  |  |  |  |  |    |
|                                                                                                                                                                                                |                                                |                                          |                                                 |                                                                        | 0.41, 0.86) |                                         |       |                                           |                         |                                                                |                        | 1.42, 3.01)                                         |                                        |  |                                  |  |  |  |  |  |  |  |    |
| Glycaemic control for diabetes with frailty: proportion of the prison population with diabetes and moderate or severe frailty, whose most recent HbA1c was ≤ 75 mmol/mol in the last 12 months | 9 of 14 eligible people (64.3%)                |                                          |                                                 |                                                                        |             |                                         |       |                                           |                         |                                                                |                        |                                                     |                                        |  |                                  |  |  |  |  |  |  |  |    |
| Asthma review: proportion of the prison population with asthma who had an asthma review in the last 12 months that included an assessment of asthma control                                    | 136 of 4,459 eligible people (3.1%)            | Decrease (0.14; 0.11, 0.17)              |                                                 | 11.2-fold (0.68 to 7.62)                                               | ..          | B (0.09; 0.07, 0.12)                    | ..    | ..                                        | 50-59 (1.48; 1.15, 1.9) | ..                                                             | 6-12 (1.78; 1.4, 2.25) | < 1 (0.36; 0.24, 0.53)                              | Asian/Asian British (1.49; 1.04, 2.14) |  | Chinese/Other (2.21; 1.03, 4.75) |  |  |  |  |  |  |  | .. |
| Epilepsy review and control: proportion of the prison population with epilepsy and prescribed antiepileptic drug(s), that had an annual                                                        | Annual review: 5 of 419 eligible people (1.2%) |                                          |                                                 |                                                                        |             |                                         |       |                                           |                         |                                                                |                        |                                                     |                                        |  |                                  |  |  |  |  |  |  |  |    |

| Indicator                                                                                                                                                                                                                                          | Achievement                                     |                                          | Variation in ORs between prisons (range of ORs) | Association between explanatory variables and achievement (OR; 95% CI)    |                      |                                         |       |                                                      |       |                                                                |       |                                                     |       |
|----------------------------------------------------------------------------------------------------------------------------------------------------------------------------------------------------------------------------------------------------|-------------------------------------------------|------------------------------------------|-------------------------------------------------|---------------------------------------------------------------------------|----------------------|-----------------------------------------|-------|------------------------------------------------------|-------|----------------------------------------------------------------|-------|-----------------------------------------------------|-------|
|                                                                                                                                                                                                                                                    | 2019-20 (%)                                     | 2019-20 compared to 2017-18 (OR; 95% CI) |                                                 | Prison category <sup>1</sup> (comparator category A)                      |                      | Gender <sup>2</sup> (comparator female) |       | Age <sup>2</sup> (comparator 30-39 years)            |       | Length of stay (months) <sup>2</sup> (comparator 1- <6 months) |       | Ethnic group <sup>2</sup> (comparator White people) |       |
|                                                                                                                                                                                                                                                    |                                                 |                                          |                                                 | Higher                                                                    | Lower                | Higher                                  | Lower | Higher                                               | Lower | Higher                                                         | Lower | Higher                                              | Lower |
| review and were seizure free in the last 12 months                                                                                                                                                                                                 | Seizure free: 1 of 419 eligible people (<1.00%) |                                          |                                                 |                                                                           |                      |                                         |       |                                                      |       |                                                                |       |                                                     |       |
| Secondary prevention of stroke: proportion of the prison population with transient ischaemic attack or stroke (excluding haemorrhagic stroke), prescribed an antiplatelet/anticoagulant in the last 12 months                                      | 51 of 86 eligible people (59.3%)                | No change (0.84; 0.22, 3.16)             | 43-fold (0.03 to 1.29)                          | B (14.65; 5.32, 40.38)<br>C (8.23; 3.94, 17.2)<br>D (23.96; 5.08, 113.02) | ..                   | ..                                      | ..    | ..                                                   | ..    | ..                                                             | ..    | ..                                                  | ..    |
| Anticoagulation for atrial fibrillation: proportion of the prison population with persistent/ paroxysmal atrial fibrillation and CHA2DS2-VASc score ≥ two, with a prescription for warfarin/direct-acting oral anticoagulant in the last 12 months | 45 of 54 eligible people (83.3%)                | 3                                        | 3                                               | 3                                                                         | 3                    | 3                                       | 3     | 3                                                    | 3     | 3                                                              | 3     | 3                                                   | 3     |
| Stroke risk assessment in atrial fibrillation: proportion of the prison population with persistent/ paroxysmal atrial fibrillation, and a CHA2DS2-VASc score in the last 12 months                                                                 | 15 of 25 eligible people (60%)                  | Increase (5.17; 1.02, 26.2)              | 34.3-fold (0.15 to 5.14)                        | ..                                                                        | C (0.19; 0.05, 0.74) | ..                                      | ..    | ..                                                   | ..    | ..                                                             | ..    | ..                                                  | ..    |
| Blood pressure control in people 79 years or under with cardiovascular disease: proportion of the prison population aged ≤ 79 years with coronary heart disease, hypertension, stroke, transient                                                   | 586 of 1,311 eligible people (44.7%)            | No change (0.94; 0.78, 1.13)             | 6.6-fold (0.52 to 3.42)                         | C (1.32; 1.08, 1.62)<br>Closed (2.31;                                     | ..                   | ..                                      | ..    | 20-29 (1.88; 1.23, 2.86)<br>30-39 (1.36; 1.06, 1.74) | ..    | > 24 (1.42; 1.08, 1.87)                                        | ..    | Asian/Asian British (1.76; 1.09, 2.84)              | ..    |

| Indicator                                                                                                                                                                                                                                                                                                                                               | Achievement                        |                                          | Variation in ORs between prisons (range of ORs) | Association between explanatory variables and achievement (OR; 95% CI) |                      |                                         |       |                                           |                          |                                                               |                        |                                                     |       |
|---------------------------------------------------------------------------------------------------------------------------------------------------------------------------------------------------------------------------------------------------------------------------------------------------------------------------------------------------------|------------------------------------|------------------------------------------|-------------------------------------------------|------------------------------------------------------------------------|----------------------|-----------------------------------------|-------|-------------------------------------------|--------------------------|---------------------------------------------------------------|------------------------|-----------------------------------------------------|-------|
|                                                                                                                                                                                                                                                                                                                                                         | 2019-20 (%)                        | 2019-20 compared to 2017-18 (OR; 95% CI) |                                                 | Prison category <sup>1</sup> (comparator category A)                   |                      | Gender <sup>2</sup> (comparator female) |       | Age <sup>2</sup> (comparator 30-39 years) |                          | Length of stay (months) <sup>2</sup> (comparator 1-<6 months) |                        | Ethnic group <sup>2</sup> (comparator White people) |       |
|                                                                                                                                                                                                                                                                                                                                                         |                                    |                                          |                                                 | Higher                                                                 | Lower                | Higher                                  | Lower | Higher                                    | Lower                    | Higher                                                        | Lower                  | Higher                                              | Lower |
| ischaemic attack or peripheral arterial disease, and without diabetes or chronic kidney disease, with blood pressure ≤ 140/90mmHg in the last 12 months                                                                                                                                                                                                 |                                    |                                          |                                                 | 1.74, 3.06)                                                            |                      |                                         |       |                                           | (comparator 50-59 years) |                                                               |                        |                                                     |       |
| Blood pressure control in people 80 years or over with cardiovascular disease: proportion of the prison population aged ≥ 80 years with coronary heart disease, hypertension, stroke, transient ischaemic attack or peripheral arterial disease, and without diabetes or chronic kidney disease, with blood pressure ≤ 150/90mmHg in the last 12 months | 10 of 19 eligible people (52.6%)   | 3                                        | 3                                               | 3                                                                      | 3                    | 3                                       | 3     | 3                                         | 3                        | 3                                                             | 3                      | 3                                                   | 3     |
| Secondary prevention of myocardial infarction: proportion of the prison population with myocardial infarction, prescribed all of the following in the last 12 months: ACE-inhibitor/ angiotensin receptor blocker, anti-platelet, beta-blocker and statin                                                                                               | 0 of 492 eligible people (0%)      | ..                                       | ..                                              | ..                                                                     | ..                   | ..                                      | ..    | ..                                        | ..                       | ..                                                            | ..                     | ..                                                  | ..    |
| Treatment of coronary heart disease: proportion of the prison population with coronary heart disease prescribed anti-platelet/ anti-coagulant therapy in the last 12 months                                                                                                                                                                             | 360 of 494 eligible people (72.9%) | No change (1.13; 0.78, 1.64)             | 2.4-fold (0.86 to 2.10)                         | ..                                                                     | B (0.46; 0.32, 0.66) | ..                                      | ..    | ..                                        | 20-29 (0.15; 0.05, 0.4)  | ..                                                            | < 1 (0.41; 0.25, 0.67) | ..                                                  | ..    |
| Treatment of heart failure: proportion of the prison population with heart failure, prescribed an ACE-inhibitor/                                                                                                                                                                                                                                        | 62 of 98 eligible people (63.3%)   | Decrease (0.32; 0.12, 0.82)              | 6.6-fold (0.6 to 3.94)                          | B (2.36; 1.02, 5.49)                                                   | ..                   | ..                                      | ..    | ..                                        | ..                       | ..                                                            | ..                     | ..                                                  | ..    |

| Indicator                                                                                                                                                                            | Achievement                      |                                          | Variation in ORs between prisons (range of ORs) | Association between explanatory variables and achievement (OR; 95% CI) |       |                                         |       |                                           |       |                                                               |       |                                                     |       |    |
|--------------------------------------------------------------------------------------------------------------------------------------------------------------------------------------|----------------------------------|------------------------------------------|-------------------------------------------------|------------------------------------------------------------------------|-------|-----------------------------------------|-------|-------------------------------------------|-------|---------------------------------------------------------------|-------|-----------------------------------------------------|-------|----|
|                                                                                                                                                                                      | 2019-20 (%)                      | 2019-20 compared to 2017-18 (OR; 95% CI) |                                                 | Prison category <sup>1</sup> (comparator category A)                   |       | Gender <sup>2</sup> (comparator female) |       | Age <sup>2</sup> (comparator 30-39 years) |       | Length of stay (months) <sup>2</sup> (comparator 1-<6 months) |       | Ethnic group <sup>2</sup> (comparator White people) |       |    |
|                                                                                                                                                                                      |                                  |                                          |                                                 | Higher                                                                 | Lower | Higher                                  | Lower | Higher                                    | Lower | Higher                                                        | Lower | Higher                                              | Lower |    |
| angiotensin receptor blocker in the last 12 months                                                                                                                                   |                                  |                                          |                                                 | C<br>(3.21;<br>1.4,<br>7.36)                                           |       |                                         |       |                                           |       |                                                               |       |                                                     |       |    |
| Treatment of heart failure: proportion of the prison population with heart failure, prescribed an ACE-inhibitor/angiotensin receptor blocker and beta-blocker, in the last 12 months | 49 of 61 eligible people (80.3%) | Decrease (0.87; 0.27, 2.76)              | ..                                              | ..                                                                     | ..    | ..                                      | ..    | ..                                        | ..    | ..                                                            | ..    | ..                                                  | ..    | .. |

<sup>1</sup> Univariate analysis

<sup>2</sup> Multivariable analysis

<sup>3</sup> Insufficient data for multivariable analysis

.. No statistically significant result (at 5%)

**Table 2b. Screening**

| Indicator                                                                                                                                                                    | Achievement                            |                                          | Variation in ORs between prisons (range of ORs) | Association between explanatory variables and achievement (OR; 95% CI) |                                                                      |                                         |       |                                           |                                                    |                                                                             |                        |                                                     |                                 |
|------------------------------------------------------------------------------------------------------------------------------------------------------------------------------|----------------------------------------|------------------------------------------|-------------------------------------------------|------------------------------------------------------------------------|----------------------------------------------------------------------|-----------------------------------------|-------|-------------------------------------------|----------------------------------------------------|-----------------------------------------------------------------------------|------------------------|-----------------------------------------------------|---------------------------------|
|                                                                                                                                                                              | 2019-20 (%)                            | 2019-20 compared to 2017-18 (OR; 95% CI) |                                                 | Prison category <sup>1</sup> (comparator category A)                   |                                                                      | Gender <sup>2</sup> (comparator female) |       | Age <sup>2</sup> (comparator 30-39 years) |                                                    | Length of stay (months) <sup>2</sup> (comparator 1-<6 months)               |                        | Ethnic group <sup>2</sup> (comparator White people) |                                 |
|                                                                                                                                                                              |                                        |                                          |                                                 | Higher                                                                 | Lower                                                                | Higher                                  | Lower | Higher                                    | Lower                                              | Higher                                                                      | Lower                  | Higher                                              | Lower                           |
| Cervical screening age 25-49 years: proportion of women in prison eligible for cervical screening, aged 25-49 years, who had the test in the last three years and six months | 1,145 of 1,796 eligible people (63.8%) | Increase (1.61; 1.37, 1.89)              | ..                                              | ..                                                                     | ..                                                                   | ..                                      | ..    | ..                                        | 20-29 (0.6; 0.47, 0.68)<br>40-49 (0.8; 0.72, 0.97) | 6-12 (1.9; 1.52, 2.29)<br>12-24 (2.0; 1.61, 2.58)<br>> 24 (2.6; 1.97, 3.43) | < 1 (0.7; 0.56, 0.78)  | ..                                                  | Chinese/Other (0.6; 0.33, 0.95) |
| Cervical screening age 50-64 years: proportion of women in prison eligible for cervical screening, aged 50-64 years, who had the test in the last five years and six months  | 159 of 259 eligible people (61.4%)     | Increase (1.5; 1.01, 2.24)               | ..                                              | ..                                                                     | ..                                                                   | ..                                      | ..    | ..                                        | ..                                                 | ..                                                                          | ..                     | ..                                                  | ..                              |
| Breast screening: proportion of women in prison eligible for breast screening, aged 50-70 years, who had the test in the last three years                                    | 59 of 179 eligible people (33%)        | Increase (1.69; 0.88, 3.21)              | ..                                              | ..                                                                     | ..                                                                   | ..                                      | ..    | ..                                        | ..                                                 | ..                                                                          | ..                     | ..                                                  | ..                              |
| Abdominal aortic aneurysm screening: proportion of men in prison eligible for abdominal aortic aneurysm screening, aged ≥ 65 years, who have had the test                    | 241 of 540 eligible people (44.6%)     | No change (1.32; 0.94, 1.85)             | 14.5-fold (0.63 to 9.12)                        | ..                                                                     | B (0.29; 0.22, 0.38)<br>C (0.51; 0.39, 0.68)<br>D (0.66; 0.44, 0.99) | ..                                      | ..    | ..                                        | ..                                                 | 12-24 (5.04; 2.98, 8.54)<br>> 24 (8.04; 4.53, 14.26)                        | < 1 (0.27; 0.14, 0.54) | Mixed (3.59; 1, 12.89)                              | ..                              |

| Indicator                                                                                                                                                                                                                                                                                                                                                                                                                                                                                 | Achievement                          |                                          | Variation in ORs between prisons (range of ORs) | Association between explanatory variables and achievement (OR; 95% CI) |                     |                                         |       |                                           |       |                                                               |       |                                                     |       |    |
|-------------------------------------------------------------------------------------------------------------------------------------------------------------------------------------------------------------------------------------------------------------------------------------------------------------------------------------------------------------------------------------------------------------------------------------------------------------------------------------------|--------------------------------------|------------------------------------------|-------------------------------------------------|------------------------------------------------------------------------|---------------------|-----------------------------------------|-------|-------------------------------------------|-------|---------------------------------------------------------------|-------|-----------------------------------------------------|-------|----|
|                                                                                                                                                                                                                                                                                                                                                                                                                                                                                           | 2019-20 (%)                          | 2019-20 compared to 2017-18 (OR; 95% CI) |                                                 | Prison category <sup>1</sup> (comparator category A)                   |                     | Gender <sup>2</sup> (comparator female) |       | Age <sup>2</sup> (comparator 30-39 years) |       | Length of stay (months) <sup>2</sup> (comparator 1-<6 months) |       | Ethnic group <sup>2</sup> (comparator White people) |       |    |
|                                                                                                                                                                                                                                                                                                                                                                                                                                                                                           |                                      |                                          |                                                 | Higher                                                                 | Lower               | Higher                                  | Lower | Higher                                    | Lower | Higher                                                        | Lower | Higher                                              | Lower |    |
| Cardiovascular disease risk assessment: proportion of the prison population aged 45 to 74 years with cardiovascular disease risk assessment in the last 5 years. People with diagnoses of: coronary heart disease, chronic kidney disease, diabetes, hypertension, atrial fibrillation, transient ischaemic attack, familial hypercholesterolemia, heart failure, peripheral arterial disease, stroke or ≥ 20% 10-year cardiovascular disease risk before the last 5 years, were excluded | 353 of 1,183 eligible people (29.8%) | <sup>4</sup>                             | 14.6-fold (0.69 to 10.04)                       | D (1.82; 1.17, 2.84)                                                   | B (0.44; 0.3, 0.63) | ..                                      | ..    | ..                                        | ..    | 6-12 (1.88; 1.19, 2.97)                                       | ..    | ..                                                  | ..    | .. |
|                                                                                                                                                                                                                                                                                                                                                                                                                                                                                           |                                      |                                          |                                                 | C (0.56; 0.41, 0.78)                                                   |                     |                                         |       |                                           |       | 12-24 (1.78; 1.12, 2.82)                                      |       |                                                     |       |    |
|                                                                                                                                                                                                                                                                                                                                                                                                                                                                                           |                                      |                                          |                                                 | Closed (0.48; 0.29, 0.8)                                               |                     |                                         |       |                                           |       |                                                               |       |                                                     |       |    |

<sup>1</sup> Univariate analysis

<sup>2</sup> Multivariable analysis

<sup>4</sup> Data only available for 2019-20

.. No statistically significant result (at 5%)



**Table 2c. Mental illness**

| Indicator                                                                                                                                                                                                                                                                                                                                           | Achievement                          |                                          | Variation in ORs between prisons (range of ORs) | Association between explanatory variables and achievement (OR; 95% CI) |                                                                           |                                         |       |                                           |                          |                                                               |                        |                                                                                    |                                        |
|-----------------------------------------------------------------------------------------------------------------------------------------------------------------------------------------------------------------------------------------------------------------------------------------------------------------------------------------------------|--------------------------------------|------------------------------------------|-------------------------------------------------|------------------------------------------------------------------------|---------------------------------------------------------------------------|-----------------------------------------|-------|-------------------------------------------|--------------------------|---------------------------------------------------------------|------------------------|------------------------------------------------------------------------------------|----------------------------------------|
|                                                                                                                                                                                                                                                                                                                                                     | 2019-20 (%)                          | 2019-20 compared to 2017-18 (OR; 95% CI) |                                                 | Prison category <sup>1</sup> (comparator category A)                   |                                                                           | Gender <sup>2</sup> (comparator female) |       | Age (comparator 30-39 years) <sup>2</sup> |                          | Length of stay (months) <sup>2</sup> (comparator 1-<6 months) |                        | Ethnic group <sup>2</sup> (comparator White people)                                |                                        |
|                                                                                                                                                                                                                                                                                                                                                     |                                      |                                          |                                                 | Higher                                                                 | Lower                                                                     | Higher                                  | Lower | Higher                                    | Lower                    | Higher                                                        | Lower                  | Higher                                                                             | Lower                                  |
| Antipsychotic monitoring: proportion of the prison population with ≥ three prescriptions for a first or second generation antipsychotic drug, and ≥ five of these measurements in the preceding 12 months: body mass index, blood pressure, blood tests for fasting glucose and/or HbA1c, lipid profile, renal and liver function, full blood count | 24 of 463 eligible people (5.2%)     | Decrease (0.13; 0.07, 0.24)              | 12.57-fold (0.68 to 8.55)                       | ..                                                                     | B (0.07; 0.04, 0.13)<br>C (0.14; 0.08, 0.24)<br>Closed (0.21; 0.12, 0.36) | ..                                      | ..    | ..                                        | ..                       | > 24 (3.48; 1.66, 7.31)                                       | ..                     | Asian/Asian British (5.67; 1.84, 17.46)<br>Black/Black British (4.04; 1.12, 14.54) | ..                                     |
| Polypharmacy, prescribed three or psychotropic drugs: proportion of the prison population prescribed ≥ three psychotropic drugs (antipsychotics, sedative antidepressants, hypnotics and anxiolytics, pregabalin or gabapentin, opioids) at the same time during an eight-week period                                                               | 216 of 25,811 eligible people (0.8%) | Increase (1.76; 1.37, 2.25)              | 11.9-fold (0.25 to 2.94)                        | Closed (3.33; 2.3, 4.82)                                               | D (0.35; 0.2, 0.64)                                                       | ..                                      | ..    | ..                                        | 20-29 (0.51; 0.38, 0.69) | 6-12 (1.64; 1.26, 2.14)<br>12-24 (2.16; 1.64, 2.85)           | < 1 (0.43; 0.31, 0.62) | ..                                                                                 | Asian/Asian British (0.22; 0.07, 0.69) |

| Indicator                                                                                                                                                                                                                                                       | Achievement                          |                                          | Variation in ORs between prisons (range of ORs) | Association between explanatory variables and achievement (OR; 95% CI) |                      |                                         |       |                                           |                          |                                                               |                        |                                                     |       |
|-----------------------------------------------------------------------------------------------------------------------------------------------------------------------------------------------------------------------------------------------------------------|--------------------------------------|------------------------------------------|-------------------------------------------------|------------------------------------------------------------------------|----------------------|-----------------------------------------|-------|-------------------------------------------|--------------------------|---------------------------------------------------------------|------------------------|-----------------------------------------------------|-------|
|                                                                                                                                                                                                                                                                 | 2019-20 (%)                          | 2019-20 compared to 2017-18 (OR; 95% CI) |                                                 | Prison category <sup>1</sup> (comparator category A)                   |                      | Gender <sup>2</sup> (comparator female) |       | Age (comparator 30-39 years) <sup>2</sup> |                          | Length of stay (months) <sup>2</sup> (comparator 1-<6 months) |                        | Ethnic group <sup>2</sup> (comparator White people) |       |
|                                                                                                                                                                                                                                                                 |                                      |                                          |                                                 | Higher                                                                 | Lower                | Higher                                  | Lower | Higher                                    | Lower                    | Higher                                                        | Lower                  | Higher                                              | Lower |
| Polypharmacy, prescribed four or psychotropic drugs: proportion of the prison population prescribed ≥ four psychotropic drugs at the same time during an eight-week period                                                                                      | 103 of 25,811 eligible people (0.4%) | Increase (2.30; 1.56, 3.39)              | 33-fold (0.10 to 3.30)                          | Closed (6.22; 3.3, 11.72)                                              | D (0.07; 0.01, 0.57) | ..                                      | ..    | ..                                        | 20-29 (0.56; 0.36, 0.87) | 6-12 (2.19; 1.48, 3.24)                                       | < 1 (0.38; 0.21, 0.67) | ..                                                  | ..    |
| Mental state examination: proportion of the prison population over 55 years with a record of one of these assessments in the preceding 12 months: Mini Mental State Examination, 6 item Cognitive Impairment Test, General practitioner Assessment of Cognition | 370 of 1,884 eligible people (19.6%) | Increase (40.47; 25.34, 64.64)           | 168.9-fold (0.65 to 109.76)                     | B (8.41; 5.79, 12.2)                                                   | ..                   | ..                                      | ..    | ..                                        | ..                       | ..                                                            | ..                     | ..                                                  | ..    |
| Diagnosis of dementia: proportion of the prison population with a new diagnosis of any form of dementia, and a record of ≥ five of these blood tests 12 months before to 6 months after date of                                                                 | 6 of 13 eligible people (46.2%)      | 3                                        | 3                                               | 3                                                                      | 3                    | 3                                       | 3     | 3                                         | 3                        | 3                                                             | 3                      | 3                                                   | 3     |

| Indicator                                                                                                                   | Achievement |                                          | Variation in ORs between prisons (range of ORs) | Association between explanatory variables and achievement (OR; 95% CI) |       |                                         |       |                                           |       |                                                               |       |                                                     |       |  |
|-----------------------------------------------------------------------------------------------------------------------------|-------------|------------------------------------------|-------------------------------------------------|------------------------------------------------------------------------|-------|-----------------------------------------|-------|-------------------------------------------|-------|---------------------------------------------------------------|-------|-----------------------------------------------------|-------|--|
|                                                                                                                             | 2019-20 (%) | 2019-20 compared to 2017-18 (OR; 95% CI) |                                                 | Prison category <sup>1</sup> (comparator category A)                   |       | Gender <sup>2</sup> (comparator female) |       | Age (comparator 30-39 years) <sup>2</sup> |       | Length of stay (months) <sup>2</sup> (comparator 1-<6 months) |       | Ethnic group <sup>2</sup> (comparator White people) |       |  |
|                                                                                                                             |             |                                          |                                                 | Higher                                                                 | Lower | Higher                                  | Lower | Higher                                    | Lower | Higher                                                        | Lower | Higher                                              | Lower |  |
| diagnosis: full blood count, calcium, glucose and/or HbA1C, renal and liver function, thyroid function, vitamin B12, folate |             |                                          |                                                 |                                                                        |       |                                         |       |                                           |       |                                                               |       |                                                     |       |  |

<sup>1</sup> Univariate analysis

<sup>2</sup> Multivariable analysis

<sup>3</sup> Insufficient data for multivariable analysis

.. No statistically significant result (at 5%)

**Table 2d. Communicable disease**

| Indicator                                                                                                                                                              | Achievement                             |                                          | Variation in ORs between prisons (range of ORs) | Association between explanatory variables and achievement (OR; 95% CI)                                                    |                     |                                         |       |                                           |                                                                                                                                                                      |                                                                                 |                        |                                                     |                                                                                                                     |
|------------------------------------------------------------------------------------------------------------------------------------------------------------------------|-----------------------------------------|------------------------------------------|-------------------------------------------------|---------------------------------------------------------------------------------------------------------------------------|---------------------|-----------------------------------------|-------|-------------------------------------------|----------------------------------------------------------------------------------------------------------------------------------------------------------------------|---------------------------------------------------------------------------------|------------------------|-----------------------------------------------------|---------------------------------------------------------------------------------------------------------------------|
|                                                                                                                                                                        | 2019-20 (%)                             | 2019-20 compared to 2017-18 (OR; 95% CI) |                                                 | Prison category <sup>1</sup> (comparator category A)                                                                      |                     | Gender <sup>2</sup> (comparator female) |       | Age (comparator 30-39 years) <sup>2</sup> |                                                                                                                                                                      | Length of stay (months) <sup>2</sup> (comparator 1-<6 months)                   |                        | Ethnic group <sup>2</sup> (comparator White people) |                                                                                                                     |
|                                                                                                                                                                        |                                         |                                          |                                                 | Higher                                                                                                                    | Lower               | Higher                                  | Lower | Higher                                    | Lower                                                                                                                                                                | Higher                                                                          | Lower                  | Higher                                              | Lower                                                                                                               |
| Dried blood spot testing: proportion of people who received new reception screening and accepted opt out dried blood spot testing for Hepatitis B, Hepatitis C and HIV | 5,653 of 12,606 (44.8%)                 | Increase (212.13; 170.37, 264.13)        | 169-fold (0.05 to 8.45)                         | B (1.31; 1.1, 1.55)<br>C (2.95; 2.48, 3.51)<br>Closed (8.09; 6.68, 9.79)<br>D (2.94; 2.45, 3.54)<br>YOI (3.87; 3.1, 4.83) | ..                  | ..                                      | ..    | ..                                        | ..                                                                                                                                                                   | 6-12 (1.36; 1.22, 1.51)<br>12-24 (1.30; 1.14, 1.5)<br>> 24 (10.15; 6.73, 15.31) | < 1 (0.53; 0.48, 0.58) | ..                                                  | ..                                                                                                                  |
| Hepatitis B vaccination: proportion of new receptions to prison who have received at least one Hepatitis B vaccination in the preceding 12 months                      | 8,210 of 17,957 eligible people (45.7%) | Increase (2.45; 2.32, 2.6)               | 3.9-fold (0.52 to 2.04)                         | Closed (1.47; 1.29, 1.67)<br>D (1.20; 1.05, 1.36)<br>YOI (1.63; 1.4, 1.91)                                                | B (0.63; 0.56, 0.7) | ..                                      | ..    | ..                                        | 10-19 (0.55; 0.46, 0.66)<br>40-49 (0.92; 0.86, 0.98)<br>50-59 (0.84; 0.76, 0.91)<br>60-69 (0.75; 0.64, 0.88)<br>70-79 (0.58; 0.42, 0.79)<br>80-89 (0.48; 0.25, 0.92) | 6-12 (1.14; 1.06, 1.22)<br>12-24 (1.65; 1.5, 1.8)<br>> 24 (1.68; 1.43, 1.98)    | < 1 (0.76; 0.72, 0.81) | ..                                                  | Asian/Asian British (0.86; 0.77, 0.97)<br>Black/Black British (0.76; 0.65, 0.9)<br>Chinese/Other (0.72; 0.57, 0.92) |
| Hepatitis B vaccination for people with a history of illicit drug use: proportion of                                                                                   | 5,117 of 10,207 eligible                | Increase (3.64; 3.37, 3.93)              | 10.9-fold (0.64 to 6.99)                        | Closed (1.76;                                                                                                             | B (0.67;            | ..                                      | ..    | ..                                        | 10-19 (0.6; 0.47, 0.76)                                                                                                                                              | 6-12 (1.12;                                                                     | < 1 (0.83;             | ..                                                  | Black/Black British (0.75; 0.59, 0.96)                                                                              |

| Indicator                                                                                                                                                                                                                                            | Achievement                          |                                          | Variation in ORs between prisons (range of ORs) | Association between explanatory variables and achievement (OR; 95% CI) |                           |                                         |       |                                           |       |                                                               |                          |                                                     |                                        |                                  |
|------------------------------------------------------------------------------------------------------------------------------------------------------------------------------------------------------------------------------------------------------|--------------------------------------|------------------------------------------|-------------------------------------------------|------------------------------------------------------------------------|---------------------------|-----------------------------------------|-------|-------------------------------------------|-------|---------------------------------------------------------------|--------------------------|-----------------------------------------------------|----------------------------------------|----------------------------------|
|                                                                                                                                                                                                                                                      | 2019-20 (%)                          | 2019-20 compared to 2017-18 (OR; 95% CI) |                                                 | Prison category <sup>1</sup> (comparator category A)                   |                           | Gender <sup>2</sup> (comparator female) |       | Age (comparator 30-39 years) <sup>2</sup> |       | Length of stay (months) <sup>2</sup> (comparator 1-<6 months) |                          | Ethnic group <sup>2</sup> (comparator White people) |                                        |                                  |
|                                                                                                                                                                                                                                                      |                                      |                                          |                                                 | Higher                                                                 | Lower                     | Higher                                  | Lower | Higher                                    | Lower | Higher                                                        | Lower                    | Higher                                              | Lower                                  |                                  |
| new receptions to prison with a history of illicit drug use who have received at least one Hepatitis B vaccination in the preceding 12 months                                                                                                        | people (50.1%)                       |                                          |                                                 | 1.47, 2.12)                                                            | 0.57, 0.8)                |                                         |       |                                           |       | 40-49 (0.89; 0.82, 0.96)                                      | 1.03, 1.23)              | 0.77, 0.89)                                         |                                        |                                  |
|                                                                                                                                                                                                                                                      |                                      |                                          |                                                 | YOI (1.50; 1.21, 1.86)                                                 |                           |                                         |       |                                           |       | 50-59 (0.86; 0.76, 0.99)                                      | 12-24 (1.53; 1.36, 1.73) |                                                     |                                        |                                  |
|                                                                                                                                                                                                                                                      |                                      |                                          |                                                 |                                                                        |                           |                                         |       |                                           |       | 60-69 (0.55; 0.39, 0.78)                                      | > 24 (1.46; 1.15, 1.85)  |                                                     |                                        |                                  |
| Influenza immunisation: proportion of the prison population with one or more of: coronary heart disease, stroke, transient ischemic attack, diabetes or chronic obstructive pulmonary disease, who received an influenza vaccination August to March | 787 of 1,752 eligible people (44.9%) | Increase (1.22; 1.02, 1.45)              | 18.2-fold (0.13 to 2.36)                        | ..                                                                     | B (0.26; 0.22, 0.31)      | ..                                      | ..    | ..                                        | ..    | 6-12 (2.16; 1.74, 2.69)                                       | < 1 (0.46; 0.35, 0.6)    | ..                                                  | Black/Black British (0.58; 0.34, 0.99) | Chinese/Other (0.40; 0.17, 0.92) |
|                                                                                                                                                                                                                                                      |                                      |                                          |                                                 |                                                                        | C (0.82; 0.68, 0.99)      |                                         |       |                                           |       | 12-24 (2.89; 2.29, 3.65)                                      |                          |                                                     |                                        |                                  |
|                                                                                                                                                                                                                                                      |                                      |                                          |                                                 |                                                                        | Closed (0.42; 0.34, 0.52) |                                         |       |                                           |       | > 24 (3.96; 3.09, 5.07)                                       |                          |                                                     |                                        |                                  |
|                                                                                                                                                                                                                                                      |                                      |                                          |                                                 |                                                                        | D (0.60; 0.47, 0.76)      |                                         |       |                                           |       |                                                               |                          |                                                     |                                        |                                  |
|                                                                                                                                                                                                                                                      |                                      |                                          |                                                 |                                                                        | YOI (0.12; 0.03, 0.56)    |                                         |       |                                           |       |                                                               |                          |                                                     |                                        |                                  |

<sup>1</sup> Univariate analysis

<sup>2</sup> Multivariable analysis

.. No statistically significant result (at 5%)

**Table 2e. Opioid and gabapentinoid prescribing**

| Indicator                                                                                                                                             | Achievement                             |                                          | Variation in ORs between prisons (range of ORs) | Association between explanatory variables and achievement (OR; 95% CI) |                                              |                                         |       |                                                      |                                                                                  |                                                                                |                        |                                                     |                                                                                                                                                 |
|-------------------------------------------------------------------------------------------------------------------------------------------------------|-----------------------------------------|------------------------------------------|-------------------------------------------------|------------------------------------------------------------------------|----------------------------------------------|-----------------------------------------|-------|------------------------------------------------------|----------------------------------------------------------------------------------|--------------------------------------------------------------------------------|------------------------|-----------------------------------------------------|-------------------------------------------------------------------------------------------------------------------------------------------------|
|                                                                                                                                                       | 2019-20 (%)                             | 2019-20 compared to 2017-18 (OR; 95% CI) |                                                 | Prison category <sup>1</sup> (comparator category A)                   |                                              | Gender <sup>2</sup> (comparator female) |       | Age <sup>2</sup> (comparator 30-39 years)            |                                                                                  | Length of stay (months) <sup>2</sup> (comparator 1-<6 months)                  |                        | Ethnic group <sup>2</sup> (comparator White people) |                                                                                                                                                 |
|                                                                                                                                                       |                                         |                                          |                                                 | Higher                                                                 | Lower                                        | Higher                                  | Lower | Higher                                               | Lower                                                                            | Higher                                                                         | Lower                  | Higher                                              | Lower                                                                                                                                           |
| Prescribed any opioid: proportion of the prison population prescribed any opioid during an eight-week period                                          | 2,957 of 25,811 eligible people (11.5%) | Increase (1.47; 1.38, 1.58)              | 5-fold (0.26 to 1.31)                           | C (1.30; 1.19, 1.43)<br>Closed (1.47; 1.32, 1.64)                      | B (0.73; 0.66, 0.8)<br>D (0.14; 0.11, 0.17)  | ..                                      | ..    | 40-49 (1.38; 1.29, 1.48)                             | 10-19 (0.14; 0.07, 0.27)<br>20-29 (0.44; 0.41, 0.48)<br>60-69 (0.83; 0.71, 0.97) | 6-12 (1.59; 1.47, 1.72)<br>12-24 (1.82; 1.67, 1.99)<br>> 24 (1.85; 1.67, 2.05) | < 1 (0.58; 0.53, 0.64) | ..                                                  | Mixed (0.55; 0.43, 0.71)<br>Asian/Asian British (0.32; 0.25, 0.4)<br>Black/Black British (0.41; 0.31, 0.54)<br>Chinese/Other (0.31; 0.2, 0.48)  |
| Prescribed any strong opioid: proportion of the prison population prescribed any strong opioid during an eight-week period                            | 2,257 of 25,811 eligible people (8.7%)  | Increase (1.22; 1.14, 1.32)              | 3.8 fold (0.36 to 1.36)                         | Closed (1.21; 1.09, 1.35)                                              | B (0.47; 0.43, 0.52)<br>D (0.14; 0.11, 0.17) | ..                                      | ..    | 40-49 (1.39; 1.3, 1.49)<br>50-59 (1.22; 1.11, 1.34)  | 10-19 (0.06; 0.02, 0.18)<br>20-29 (0.38; 0.34, 0.41)                             | 6-12 (1.44; 1.32, 1.57)<br>12-24 (1.75; 1.59, 1.91)<br>> 24 (1.92; 1.73, 2.13) | < 1 (0.79; 0.72, 0.87) | ..                                                  | Mixed (0.51; 0.39, 0.67)<br>Asian/Asian British (0.34; 0.26, 0.43)<br>Black/Black British (0.37; 0.28, 0.5)<br>Chinese/Other (0.33; 0.21, 0.51) |
| Prescribed any opioid with benzodiazepines: proportion of the prison population prescribed any opioid and benzodiazepines during an eight-week period | 2,257 of 25,811 eligible people (8.7%)  | Increase (1.18; 1.1, 1.27)               | 12-fold (0.39 to 4.68)                          | B (1.20; 1.1, 1.32)<br>Closed (1.24; 1.11, 1.38)                       | D (0.13; 0.11, 0.16)                         | ..                                      | ..    | 40-49 (1.32; 1.24, 1.42)<br>50-59 (1.19; 1.09, 1.31) | 10-19 (0.46; 0.34, 0.61)<br>20-29 (0.5; 0.47, 0.54)                              | 6-12 (1.36; 1.26, 1.47)<br>12-24 (1.6; 1.47, 1.75)<br>> 24                     | < 1 (0.85; 0.78, 0.92) | ..                                                  | Mixed (0.62; 0.5, 0.78)<br>Asian/Asian British (0.56; 0.48, 0.65)<br>Black/Black British (0.47; 0.37, 0.6)<br>Chinese/Other (0.48; 0.35, 0.66)  |

| Indicator                                                                                                                                                                                                        | Achievement                          |                                          | Variation in ORs between prisons (range of ORs) | Association between explanatory variables and achievement (OR; 95% CI)    |       |                                         |                                                                                                                |                                                     |                                                                                  |                                                                                |                        |                                                                                                             |                                                                    |
|------------------------------------------------------------------------------------------------------------------------------------------------------------------------------------------------------------------|--------------------------------------|------------------------------------------|-------------------------------------------------|---------------------------------------------------------------------------|-------|-----------------------------------------|----------------------------------------------------------------------------------------------------------------|-----------------------------------------------------|----------------------------------------------------------------------------------|--------------------------------------------------------------------------------|------------------------|-------------------------------------------------------------------------------------------------------------|--------------------------------------------------------------------|
|                                                                                                                                                                                                                  | 2019-20 (%)                          | 2019-20 compared to 2017-18 (OR; 95% CI) |                                                 | Prison category <sup>1</sup> (comparator category A)                      |       | Gender <sup>2</sup> (comparator female) |                                                                                                                | Age <sup>2</sup> (comparator 30-39 years)           |                                                                                  | Length of stay (months) <sup>2</sup> (comparator 1-<6 months)                  |                        | Ethnic group <sup>2</sup> (comparator White people)                                                         |                                                                    |
|                                                                                                                                                                                                                  |                                      |                                          |                                                 | Higher                                                                    | Lower | Higher                                  | Lower                                                                                                          | Higher                                              | Lower                                                                            | Higher                                                                         | Lower                  | Higher                                                                                                      | Lower                                                              |
|                                                                                                                                                                                                                  |                                      |                                          |                                                 |                                                                           |       |                                         |                                                                                                                |                                                     |                                                                                  |                                                                                |                        |                                                                                                             |                                                                    |
| People with any mental illness prescribed any opioid: proportion of the prison population with any mental illness prescribed any opioid during an eight-week period                                              | 770 of 4,054 eligible people (19.0%) | Increase (1.64; 1.41, 1.91)              | 11.1-fold (0.27 to 3.0)                         | C (2.04; 1.62, 2.58)<br>Closed (1.60; 1.26, 2.03)                         | ..    | ..                                      | ..                                                                                                             | 40-49 (1.4; 1.21, 1.61)<br>50-59 (1.35; 1.11, 1.63) | 10-19 (0.24; 0.03, 1.89)<br>20-29 (0.42; 0.35, 0.51)<br>70-79 (0.47; 0.23, 0.95) | 6-12 (1.71; 1.46, 2.02)<br>12-24 (2.01; 1.67, 2.42)<br>> 24 (1.95; 1.56, 2.43) | < 1 (0.66; 0.54, 0.81) | ..                                                                                                          | Mixed (0.58; 0.36, 0.95)<br>Asian/Asian British (0.25; 0.13, 0.48) |
| No diagnosis of neuropathic pain and prescribed a gabapentinoid: proportion of the prison population with no coded diagnosis of neuropathic pain prescribed pregabalin or gabapentin during an eight-week period | 204 of 24,388 eligible people (0.8%) | Decrease (0.89; 0.71, 1.1)               | 1.93-fold (0.67 to 1.29)                        | ..<br>B (0.40; 0.32, 0.5)<br>C (0.27; 0.21, 0.35)<br>D (0.18; 0.12, 0.28) | ..    | ..                                      | 40-49 (1.77; 1.43, 2.19)<br>50-59 (1.7; 1.31, 2.21)<br>60-69 (1.54; 1.02, 2.31)<br>90-99 (12.22; 1.41, 105.56) | 20-29 (0.25; 0.17, 0.36)                            | 6-12 (1.77; 1.38, 2.29)<br>12-24 (1.91; 1.43, 2.54)<br>> 24 (1.91; 1.36, 2.67)   | < 1 (0.51; 0.37, 0.7)                                                          | ..                     | Mixed (0.33; 0.12, 0.9)<br>Asian/Asian British (0.18; 0.07, 0.48)<br>Black/Black British (0.22; 0.07, 0.69) |                                                                    |

<sup>1</sup> Univariate analysis

<sup>2</sup> Multivariable analysis

.. No statistically significant result (at 5%)

**Table 2f. Prison specific**

| Indicator                                                                                                                                                                                                                                                                                          | Achievement                              |                                          | Variation in ORs between prisons (range of Ors) | Association between explanatory variables and achievement (OR; 95% CI) |                        |                                         |                       |                                           |                          |                                                               |                        |                                                     |                                        |
|----------------------------------------------------------------------------------------------------------------------------------------------------------------------------------------------------------------------------------------------------------------------------------------------------|------------------------------------------|------------------------------------------|-------------------------------------------------|------------------------------------------------------------------------|------------------------|-----------------------------------------|-----------------------|-------------------------------------------|--------------------------|---------------------------------------------------------------|------------------------|-----------------------------------------------------|----------------------------------------|
|                                                                                                                                                                                                                                                                                                    | 2019-20 (%)                              | 2019-20 compared to 2017-18 (OR; 95% CI) |                                                 | Prison category <sup>1</sup> (comparator category A)                   |                        | Gender <sup>2</sup> (comparator female) |                       | Age <sup>2</sup> (comparator 30-39 years) |                          | Length of stay (months) <sup>2</sup> (comparator 1-<6 months) |                        | Ethnic group <sup>2</sup> (comparator White people) |                                        |
|                                                                                                                                                                                                                                                                                                    |                                          |                                          |                                                 | Higher                                                                 | Lower                  | Higher                                  | Lower                 | Higher                                    | Lower                    | Higher                                                        | Lower                  | Higher                                              | Lower                                  |
| Consent to transfer medical records: proportion of new receptions to prison who have been asked for consent to transfer medical records from community primary care to prison healthcare                                                                                                           | 12,639 of 17,957 eligible people (70.4%) | Increase (4.28; 3.96, 4.62)              | 337.1-fold (0.007 to 2.36)                      | C (1.43; 1.26, 1.64)                                                   | B (0.38; 0.33, 0.43)   | ..                                      | Men (0.1; 0.02, 0.14) | ..                                        | 50-59 (0.86; 0.76, 0.97) | 6-12 (1.22; 1.11, 1.34)                                       | < 1 (0.77; 0.71, 0.83) | ..                                                  | Mixed (0.80; 0.65, 0.99)               |
|                                                                                                                                                                                                                                                                                                    |                                          |                                          |                                                 | Closed (2.86; 2.44, 3.35)                                              |                        |                                         |                       |                                           | 60-69 (0.72; 0.58, 0.89) | 12-24 (1.43; 1.25, 1.63)                                      |                        |                                                     | Asian/Asian British (0.80; 0.69, 0.92) |
|                                                                                                                                                                                                                                                                                                    |                                          |                                          |                                                 | YOI (3.88; 3.08, 4.89)                                                 |                        |                                         |                       |                                           |                          | > 24 (1.85; 1.47, 2.31)                                       |                        |                                                     | Black/Black British (0.75; 0.61, 0.93) |
|                                                                                                                                                                                                                                                                                                    |                                          |                                          |                                                 |                                                                        |                        |                                         |                       |                                           |                          |                                                               |                        |                                                     | Chinese/Other (0.70; 0.52, 0.96)       |
| Medicine reconciliation and in-possession risk assessment: proportion of new receptions to prison who had a second-stage health assessment, plus in-possession risk assessment <sup>a</sup> and medicines reconciliation <sup>b</sup> , accurately communicated in the week before that assessment | 2,359 of 6,173 eligible people (38.2%)   | <sup>4</sup>                             | 21,610-fold (0.45 to 9724.5)                    | B (5.91; 4.81, 7.25)                                                   | C (0.43; 0.35, 0.52)   | ..                                      | ..                    | ..                                        | ..                       | < 1 (3.02; 1.86, 4.89)                                        | ..                     | ..                                                  | ..                                     |
|                                                                                                                                                                                                                                                                                                    |                                          |                                          |                                                 | D (1.70; 1.33, 2.16)                                                   | YOI (0.02; 0.01, 0.06) |                                         |                       |                                           |                          | 6-12 (3.17; 2.26, 4.44)                                       |                        |                                                     |                                        |
|                                                                                                                                                                                                                                                                                                    |                                          |                                          |                                                 |                                                                        |                        |                                         |                       |                                           |                          | > 24 (1.54; 1.01, 2.33)                                       |                        |                                                     |                                        |
| <sup>a</sup> In-possession risk assessment: a standardised assessment of whether it is safe for medication to be held in the                                                                                                                                                                       |                                          |                                          |                                                 |                                                                        |                        |                                         |                       |                                           |                          |                                                               |                        |                                                     |                                        |



|                                                                                                                                                                                                                                                        |  |  |  |  |  |  |  |  |  |  |  |  |  |  |
|--------------------------------------------------------------------------------------------------------------------------------------------------------------------------------------------------------------------------------------------------------|--|--|--|--|--|--|--|--|--|--|--|--|--|--|
| possession of the prisoner.<br><sup>b</sup> Medicines reconciliation: identifying a n accurate list of a person's current medicines and comparing them with what medications are being prescribed, recognising discrepancies, and documenting changes. |  |  |  |  |  |  |  |  |  |  |  |  |  |  |
|--------------------------------------------------------------------------------------------------------------------------------------------------------------------------------------------------------------------------------------------------------|--|--|--|--|--|--|--|--|--|--|--|--|--|--|

- <sup>1</sup> Univariate analysis
- <sup>2</sup> Multivariable analysis
- <sup>4</sup> Data only available for 2019-20
- .. No statistically significant result (at 5%)

Supplementary section 2: Descriptive statistics for each indicator

| Indicator                               |            | The proportion of people with diabetes in whom the last blood pressure reading (measured in the preceding 12 months) is 140/80 mmHg or less |                                   |                                     |                                   |                  |
|-----------------------------------------|------------|---------------------------------------------------------------------------------------------------------------------------------------------|-----------------------------------|-------------------------------------|-----------------------------------|------------------|
| Group: Diabetes, Asthma & Epilepsy Care |            | Community achievement 2019/20: 68.01% (QOF 19/20 - for patients without moderate or severe frailty only)                                    |                                   |                                     |                                   |                  |
| Variable                                | Population | Eligible <sup>1</sup> (% popln)                                                                                                             | Satisfy <sup>2</sup> (% eligible) | Elsewhere <sup>3</sup> (% eligible) | Achieve <sup>4</sup> (% eligible) |                  |
| <b>Year</b>                             |            |                                                                                                                                             |                                   |                                     |                                   |                  |
| 2017/18                                 | 21,677     | 675 (3.1)                                                                                                                                   | 230 (34.1)                        | <10 <sup>6</sup>                    | 232 (34.4)                        |                  |
| 2018/19                                 | 22,099     | 713 (3.2)                                                                                                                                   | 237 (33.2)                        | <10 <sup>6</sup>                    | 240 (33.7)                        |                  |
| 2019/20                                 | 25,811     | 770 (3.0)                                                                                                                                   | 256 (33.2)                        | <10 <sup>6</sup>                    | 261 (33.9)                        |                  |
| <b>Prison</b>                           |            |                                                                                                                                             |                                   |                                     |                                   |                  |
| 2017/18                                 | Prison 1   | 1,323                                                                                                                                       | 25 (1.9)                          | 4 (16.0)                            | <10 <sup>6</sup>                  | <10 <sup>6</sup> |
|                                         | Prison 2   | 3,261                                                                                                                                       | 96 (2.9)                          | 35 (36.5)                           | <10 <sup>6</sup>                  | 36 (37.5)        |
|                                         | Prison 3   | 2,623                                                                                                                                       | 70 (2.7)                          | 20 (28.6)                           | <10 <sup>6</sup>                  | 20 (28.6)        |
|                                         | Prison 4   | 2,089                                                                                                                                       | 68 (3.3)                          | 41 (60.3)                           | <10 <sup>6</sup>                  | 41 (60.3)        |
|                                         | Prison 5   | 637                                                                                                                                         | 22 (3.5)                          | <10 <sup>6</sup>                    | <10 <sup>6</sup>                  | <10 <sup>6</sup> |
|                                         | Prison 6   | 1,552                                                                                                                                       | 54 (3.5)                          | 23 (42.6)                           | <10 <sup>6</sup>                  | 23 (42.6)        |
|                                         | Prison 7   | 635                                                                                                                                         | 21 (3.3)                          | <10 <sup>6</sup>                    | <10 <sup>6</sup>                  | <10 <sup>6</sup> |
|                                         | Prison 8   | 1,085                                                                                                                                       | 29 (2.7)                          | 14 (48.3)                           | <10 <sup>6</sup>                  | 14 (48.3)        |
|                                         | Prison 9   | 981                                                                                                                                         | 86 (8.8)                          | 22 (25.6)                           | <10 <sup>6</sup>                  | 22 (25.6)        |
|                                         | Prison 10  | 2,523                                                                                                                                       | 75 (3.0)                          | 24 (32.0)                           | <10 <sup>6</sup>                  | 24 (32.0)        |
|                                         | Prison 11  | 3,470                                                                                                                                       | 83 (2.4)                          | 14 (16.9)                           | <10 <sup>6</sup>                  | 14 (16.9)        |
|                                         | Prison 12  | 815                                                                                                                                         | <10 <sup>6</sup>                  | <10 <sup>6</sup>                    | <10 <sup>6</sup>                  | <10 <sup>6</sup> |
|                                         | Prison 13  | 683                                                                                                                                         | 42 (6.1)                          | 15 (35.7)                           | <10 <sup>6</sup>                  | 15 (35.7)        |
| 2018/19                                 | Prison 1   | 1,333                                                                                                                                       | 19 (1.4)                          | 11 (57.9)                           | <10 <sup>6</sup>                  | 11 (57.9)        |
|                                         | Prison 2   | 2,705                                                                                                                                       | 73 (2.7)                          | 11 (15.1)                           | <10 <sup>6</sup>                  | 11 (15.1)        |
|                                         | Prison 3   | 2,522                                                                                                                                       | 85 (3.4)                          | 33 (38.8)                           | <10 <sup>6</sup>                  | 33 (38.8)        |
|                                         | Prison 4   | 2,349                                                                                                                                       | 76 (3.2)                          | 28 (36.8)                           | <10 <sup>6</sup>                  | 28 (36.8)        |
|                                         | Prison 5   | 676                                                                                                                                         | 22 (3.3)                          | 8 (36.4)                            | <10 <sup>6</sup>                  | <10 <sup>6</sup> |
|                                         | Prison 6   | 1,513                                                                                                                                       | 48 (3.2)                          | 22 (45.8)                           | <10 <sup>6</sup>                  | 22 (45.8)        |
|                                         | Prison 7   | 654                                                                                                                                         | 19 (2.9)                          | <10 <sup>6</sup>                    | <10 <sup>6</sup>                  | <10 <sup>6</sup> |
|                                         | Prison 8   | 1,148                                                                                                                                       | 34 (3.0)                          | 23 (67.6)                           | <10 <sup>6</sup>                  | 23 (67.6)        |
|                                         | Prison 9   | 996                                                                                                                                         | 105 (10.5)                        | 25 (23.8)                           | <10 <sup>6</sup>                  | 25 (23.8)        |
|                                         | Prison 10  | 2,717                                                                                                                                       | 77 (2.8)                          | 32 (41.6)                           | <10 <sup>6</sup>                  | 34 (44.2)        |
|                                         | Prison 11  | 4,020                                                                                                                                       | 113 (2.8)                         | 21 (18.6)                           | <10 <sup>6</sup>                  | 22 (19.5)        |
|                                         | Prison 12  | 792                                                                                                                                         | <10 <sup>6</sup>                  | <10 <sup>6</sup>                    | <10 <sup>6</sup>                  | <10 <sup>6</sup> |
|                                         | Prison 13  | 674                                                                                                                                         | 39 (5.8)                          | 15 (38.5)                           | <10 <sup>6</sup>                  | 15 (38.5)        |
| 2019/20                                 | Prison 1   | 1,410                                                                                                                                       | 37 (2.6)                          | 18 (48.6)                           | <10 <sup>6</sup>                  | 18 (48.6)        |
|                                         | Prison 2   | 2,979                                                                                                                                       | 77 (2.6)                          | 19 (24.7)                           | <10 <sup>6</sup>                  | 19 (24.7)        |
|                                         | Prison 3   | 2,809                                                                                                                                       | 88 (3.1)                          | 40 (45.5)                           | <10 <sup>6</sup>                  | 40 (45.5)        |
|                                         | Prison 4   | 2,651                                                                                                                                       | <10 <sup>6</sup>                  | <10 <sup>6</sup>                    | <10 <sup>6</sup>                  | <10 <sup>6</sup> |
|                                         | Prison 5   | 616                                                                                                                                         | 25 (4.1)                          | <10 <sup>6</sup>                    | <10 <sup>6</sup>                  | <10 <sup>6</sup> |
|                                         | Prison 6   | 1,533                                                                                                                                       | 51 (3.3)                          | 11 (21.6)                           | <10 <sup>6</sup>                  | 11 (21.6)        |
|                                         | Prison 7   | 860                                                                                                                                         | 29 (3.4)                          | 12 (41.4)                           | <10 <sup>6</sup>                  | 12 (41.4)        |
|                                         | Prison 8   | 1,385                                                                                                                                       | 44 (3.2)                          | 29 (65.9)                           | <10 <sup>6</sup>                  | 29 (65.9)        |
|                                         | Prison 9   | 1,092                                                                                                                                       | 128 (11.7)                        | 26 (20.3)                           | <10 <sup>6</sup>                  | 29 (22.7)        |
|                                         | Prison 10  | 3,577                                                                                                                                       | 97 (2.7)                          | 42 (43.3)                           | <10 <sup>6</sup>                  | 42 (43.3)        |
|                                         | Prison 11  | 5,348                                                                                                                                       | 138 (2.6)                         | 38 (27.5)                           | <10 <sup>6</sup>                  | 38 (27.5)        |
|                                         | Prison 12  | 805                                                                                                                                         | <10 <sup>6</sup>                  | <10 <sup>6</sup>                    | <10 <sup>6</sup>                  | <10 <sup>6</sup> |
|                                         | Prison 13  | 746                                                                                                                                         | 46 (6.2)                          | 12 (26.1)                           | <10 <sup>6</sup>                  | 13 (28.3)        |
| <b>Prison category</b>                  |            |                                                                                                                                             |                                   |                                     |                                   |                  |
| 2017/18                                 | A          | 1,664                                                                                                                                       | 128 (7.7)                         | 37 (28.9)                           | <10 <sup>6</sup>                  | 37 (28.9)        |
|                                         | B          | 9,254                                                                                                                                       | 254 (2.7)                         | 73 (28.7)                           | <10 <sup>6</sup>                  | 74 (29.1)        |
|                                         | C          | 6,035                                                                                                                                       | 163 (2.7)                         | 65 (39.9)                           | <10 <sup>6</sup>                  | 65 (39.9)        |
|                                         | Closed     | 1,720                                                                                                                                       | 50 (2.9)                          | 21 (42.0)                           | <10 <sup>6</sup>                  | 21 (42.0)        |
|                                         | D          | 2,189                                                                                                                                       | 76 (3.5)                          | 31 (40.8)                           | <10 <sup>6</sup>                  | 32 (42.1)        |
|                                         | YOI        | 815                                                                                                                                         | <10 <sup>6</sup>                  | <10 <sup>6</sup>                    | <10 <sup>6</sup>                  | <10 <sup>6</sup> |
| 2018/19                                 | A          | 1,670                                                                                                                                       | 144 (8.6)                         | 40 (27.8)                           | <10 <sup>6</sup>                  | 40 (27.8)        |
|                                         | B          | 9,442                                                                                                                                       | 263 (2.8)                         | 64 (24.3)                           | <10 <sup>6</sup>                  | 67 (25.5)        |
|                                         | C          | 6,204                                                                                                                                       | 180 (2.9)                         | 72 (40.0)                           | <10 <sup>6</sup>                  | 72 (40.0)        |
|                                         | Closed     | 1,802                                                                                                                                       | 53 (2.9)                          | 29 (54.7)                           | <10 <sup>6</sup>                  | 29 (54.7)        |
|                                         | D          | 2,189                                                                                                                                       | 70 (3.2)                          | 30 (42.9)                           | <10 <sup>6</sup>                  | 30 (42.9)        |
|                                         | YOI        | 792                                                                                                                                         | <10 <sup>6</sup>                  | <10 <sup>6</sup>                    | <10 <sup>6</sup>                  | <10 <sup>6</sup> |
| 2019/20                                 | A          | 1,838                                                                                                                                       | 174 (9.5)                         | 38 (21.8)                           | <10 <sup>6</sup>                  | 42 (24.1)        |
|                                         | B          | 11,904                                                                                                                                      | 312 (2.6)                         | 99 (31.7)                           | <10 <sup>6</sup>                  | 99 (31.7)        |
|                                         | C          | 6,870                                                                                                                                       | 131 (1.9)                         | 59 (45.0)                           | <10 <sup>6</sup>                  | 59 (45.0)        |
|                                         | Closed     | 2,245                                                                                                                                       | 73 (3.3)                          | 41 (56.2)                           | <10 <sup>6</sup>                  | 41 (56.2)        |
|                                         | D          | 2,149                                                                                                                                       | 76 (3.5)                          | 19 (25.0)                           | <10 <sup>6</sup>                  | 20 (26.3)        |
|                                         | YOI        | 805                                                                                                                                         | <10 <sup>6</sup>                  | <10 <sup>6</sup>                    | <10 <sup>6</sup>                  | <10 <sup>6</sup> |
| <b>Gender</b>                           |            |                                                                                                                                             |                                   |                                     |                                   |                  |
| 2017/18                                 | F          | 1,699                                                                                                                                       | 50 (2.9)                          | 21 (42.0)                           | <10 <sup>6</sup>                  | 21 (42.0)        |
|                                         | M          | 19,977                                                                                                                                      | 625 (3.1)                         | 209 (33.4)                          | <10 <sup>6</sup>                  | 211 (33.8)       |
| 2018/19                                 | F          | 1,802                                                                                                                                       | 52 (2.9)                          | 29 (55.8)                           | <10 <sup>6</sup>                  | 29 (55.8)        |
|                                         | M          | 20,295                                                                                                                                      | 661 (3.3)                         | 208 (31.5)                          | <10 <sup>6</sup>                  | 211 (31.9)       |
| 2019/20                                 | F          | 2,240                                                                                                                                       | 73 (3.3)                          | 41 (56.2)                           | <10 <sup>6</sup>                  | 41 (56.2)        |
|                                         | M          | 23,570                                                                                                                                      | 697 (3.0)                         | 215 (30.8)                          | <10 <sup>6</sup>                  | 220 (31.6)       |

<sup>1</sup>Eligible for indicator; <sup>2</sup>Achieve in current prison; <sup>3</sup>Achieve in previous prison; <sup>4</sup>Overall achievement - either current or previous prison; <sup>5</sup>Declined indicator; <sup>6</sup>Suppressed (<10) to avoid disclosure

Supplementary section 2: Descriptive statistics for each indicator

| Indicator                      | The proportion of people with diabetes in whom the last blood pressure reading (measured in the preceding 12 months) is 140/80 mmHg or less |                  |                                 |                                   |                                     |                                   |                  |
|--------------------------------|---------------------------------------------------------------------------------------------------------------------------------------------|------------------|---------------------------------|-----------------------------------|-------------------------------------|-----------------------------------|------------------|
|                                | Variable                                                                                                                                    | Population       | Eligible <sup>1</sup> (% popln) | Satisfy <sup>2</sup> (% eligible) | Elsewhere <sup>3</sup> (% eligible) | Achieve <sup>4</sup> (% eligible) |                  |
| 2017/18                        | Sentence Status                                                                                                                             |                  |                                 |                                   |                                     |                                   |                  |
|                                | .                                                                                                                                           | 81               | <10 <sup>6</sup>                | <10 <sup>6</sup>                  | <10 <sup>6</sup>                    | <10 <sup>6</sup>                  |                  |
|                                | Absconded                                                                                                                                   | <10 <sup>6</sup> | <10 <sup>6</sup>                | <10 <sup>6</sup>                  | <10 <sup>6</sup>                    | <10 <sup>6</sup>                  |                  |
|                                | Active In                                                                                                                                   | 15,872           | 500 (3.2)                       | 175 (35.0)                        | <10 <sup>6</sup>                    | 176 (35.2)                        |                  |
|                                | Active Out                                                                                                                                  | 1,052            | 30 (2.9)                        | <10 <sup>6</sup>                  | <10 <sup>6</sup>                    | <10 <sup>6</sup>                  |                  |
|                                | Convicted Sentence                                                                                                                          | 2,125            | 59 (2.8)                        | 21 (35.6)                         | <10 <sup>6</sup>                    | 21 (35.6)                         |                  |
|                                | Downgrade in security category                                                                                                              | <10 <sup>6</sup> | <10 <sup>6</sup>                | <10 <sup>6</sup>                  | <10 <sup>6</sup>                    | <10 <sup>6</sup>                  |                  |
|                                | Internal Cell Move                                                                                                                          | <10 <sup>6</sup> | <10 <sup>6</sup>                | <10 <sup>6</sup>                  | <10 <sup>6</sup>                    | <10 <sup>6</sup>                  |                  |
|                                | Judges Remand                                                                                                                               | 92               | <10 <sup>6</sup>                | <10 <sup>6</sup>                  | <10 <sup>6</sup>                    | <10 <sup>6</sup>                  |                  |
|                                | Licence Revoke                                                                                                                              | 52               | <10 <sup>6</sup>                | <10 <sup>6</sup>                  | <10 <sup>6</sup>                    | <10 <sup>6</sup>                  |                  |
|                                | On Remand                                                                                                                                   | 1,492            | 47 (3.2)                        | 10 (21.3)                         | <10 <sup>6</sup>                    | 11 (23.4)                         |                  |
|                                | Transfer                                                                                                                                    | 910              | 31 (3.4)                        | 13 (41.9)                         | <10 <sup>6</sup>                    | 13 (41.9)                         |                  |
|                                | Upgrade in security category                                                                                                                | <10 <sup>6</sup> | <10 <sup>6</sup>                | <10 <sup>6</sup>                  | <10 <sup>6</sup>                    | <10 <sup>6</sup>                  |                  |
|                                | 2018/19                                                                                                                                     | .                | 88                              | <10 <sup>6</sup>                  | <10 <sup>6</sup>                    | <10 <sup>6</sup>                  | <10 <sup>6</sup> |
|                                |                                                                                                                                             | Absconded        | <10 <sup>6</sup>                | <10 <sup>6</sup>                  | <10 <sup>6</sup>                    | <10 <sup>6</sup>                  | <10 <sup>6</sup> |
| Active In                      |                                                                                                                                             | 18,145           | 589 (3.2)                       | 204 (34.6)                        | <10 <sup>6</sup>                    | 207 (35.1)                        |                  |
| Active Out                     |                                                                                                                                             | 835              | 34 (4.1)                        | 14 (41.2)                         | <10 <sup>6</sup>                    | 14 (41.2)                         |                  |
| Convicted Sentence             |                                                                                                                                             | 1,320            | 38 (2.9)                        | <10 <sup>6</sup>                  | <10 <sup>6</sup>                    | <10 <sup>6</sup>                  |                  |
| Downgrade in security category |                                                                                                                                             | <10 <sup>6</sup> | <10 <sup>6</sup>                | <10 <sup>6</sup>                  | <10 <sup>6</sup>                    | <10 <sup>6</sup>                  |                  |
| Internal Cell Move             |                                                                                                                                             | <10 <sup>6</sup> | <10 <sup>6</sup>                | <10 <sup>6</sup>                  | <10 <sup>6</sup>                    | <10 <sup>6</sup>                  |                  |
| Judges Remand                  |                                                                                                                                             | <10 <sup>6</sup> | <10 <sup>6</sup>                | <10 <sup>6</sup>                  | <10 <sup>6</sup>                    | <10 <sup>6</sup>                  |                  |
| Licence Revoke                 |                                                                                                                                             | 125              | <10 <sup>6</sup>                | <10 <sup>6</sup>                  | <10 <sup>6</sup>                    | <10 <sup>6</sup>                  |                  |
| On Remand                      |                                                                                                                                             | 1,059            | 25 (2.4)                        | <10 <sup>6</sup>                  | <10 <sup>6</sup>                    | <10 <sup>6</sup>                  |                  |
| Transfer                       |                                                                                                                                             | 518              | 20 (3.9)                        | <10 <sup>6</sup>                  | <10 <sup>6</sup>                    | <10 <sup>6</sup>                  |                  |
| Upgrade in security category   |                                                                                                                                             | <10 <sup>6</sup> | <10 <sup>6</sup>                | <10 <sup>6</sup>                  | <10 <sup>6</sup>                    | <10 <sup>6</sup>                  |                  |
| 2019/20                        |                                                                                                                                             | .                | 69                              | <10 <sup>6</sup>                  | <10 <sup>6</sup>                    | <10 <sup>6</sup>                  | <10 <sup>6</sup> |
|                                |                                                                                                                                             | Absconded        | <10 <sup>6</sup>                | <10 <sup>6</sup>                  | <10 <sup>6</sup>                    | <10 <sup>6</sup>                  | <10 <sup>6</sup> |
|                                |                                                                                                                                             | Active In        | 22,424                          | 674 (3.0)                         | 226 (33.5)                          | <10 <sup>6</sup>                  | 231 (34.3)       |
|                                | Active Out                                                                                                                                  | 625              | 26 (4.2)                        | 13 (50.0)                         | <10 <sup>6</sup>                    | 13 (50.0)                         |                  |
|                                | Convicted Sentence                                                                                                                          | 1,361            | 36 (2.6)                        | <10 <sup>6</sup>                  | <10 <sup>6</sup>                    | <10 <sup>6</sup>                  |                  |
|                                | Downgrade in security category                                                                                                              | <10 <sup>6</sup> | <10 <sup>6</sup>                | <10 <sup>6</sup>                  | <10 <sup>6</sup>                    | <10 <sup>6</sup>                  |                  |
|                                | Internal Cell Move                                                                                                                          | <10 <sup>6</sup> | <10 <sup>6</sup>                | <10 <sup>6</sup>                  | <10 <sup>6</sup>                    | <10 <sup>6</sup>                  |                  |
|                                | Judges Remand                                                                                                                               | 19               | <10 <sup>6</sup>                | <10 <sup>6</sup>                  | <10 <sup>6</sup>                    | <10 <sup>6</sup>                  |                  |
|                                | Licence Revoke                                                                                                                              | 178              | <10 <sup>6</sup>                | <10 <sup>6</sup>                  | <10 <sup>6</sup>                    | <10 <sup>6</sup>                  |                  |
|                                | On Remand                                                                                                                                   | 1,031            | 23 (2.2)                        | <10 <sup>6</sup>                  | <10 <sup>6</sup>                    | <10 <sup>6</sup>                  |                  |
|                                | Transfer                                                                                                                                    | 101              | <10 <sup>6</sup>                | <10 <sup>6</sup>                  | <10 <sup>6</sup>                    | <10 <sup>6</sup>                  |                  |
|                                | Upgrade in security category                                                                                                                | <10 <sup>6</sup> | <10 <sup>6</sup>                | <10 <sup>6</sup>                  | <10 <sup>6</sup>                    | <10 <sup>6</sup>                  |                  |
|                                | Age - years                                                                                                                                 | 2017/18          |                                 |                                   |                                     |                                   |                  |
|                                |                                                                                                                                             | 10 - <20         | 468                             | <10 <sup>6</sup>                  | <10 <sup>6</sup>                    | <10 <sup>6</sup>                  | <10 <sup>6</sup> |
|                                |                                                                                                                                             | 20 - <30         | 6,994                           | 71 (1.0)                          | 40 (56.3)                           | <10 <sup>6</sup>                  | 41 (57.7)        |
| 30 - <40                       |                                                                                                                                             | 7,051            | 101 (1.4)                       | 40 (39.6)                         | <10 <sup>6</sup>                    | 40 (39.6)                         |                  |
| 40 - <50                       |                                                                                                                                             | 4,114            | 140 (3.4)                       | 38 (27.1)                         | <10 <sup>6</sup>                    | 38 (27.1)                         |                  |
| 50 - <60                       |                                                                                                                                             | 2,107            | 194 (9.2)                       | 66 (34.0)                         | <10 <sup>6</sup>                    | 66 (34.0)                         |                  |
| 60 - <70                       |                                                                                                                                             | 684              | 109 (15.9)                      | 27 (24.8)                         | <10 <sup>6</sup>                    | 28 (25.7)                         |                  |
| 70 - <80                       |                                                                                                                                             | 213              | 47 (22.1)                       | 15 (31.9)                         | <10 <sup>6</sup>                    | 15 (31.9)                         |                  |
| 80 - <90                       |                                                                                                                                             | 40               | 10 (25.0)                       | <10 <sup>6</sup>                  | <10 <sup>6</sup>                    | <10 <sup>6</sup>                  |                  |
| 90 - <100                      |                                                                                                                                             | <10 <sup>6</sup> | <10 <sup>6</sup>                | <10 <sup>6</sup>                  | <10 <sup>6</sup>                    | <10 <sup>6</sup>                  |                  |
| 100 - <110                     |                                                                                                                                             | <10 <sup>6</sup> | <10 <sup>6</sup>                | <10 <sup>6</sup>                  | <10 <sup>6</sup>                    | <10 <sup>6</sup>                  |                  |
| 2018/19                        |                                                                                                                                             |                  |                                 |                                   |                                     |                                   |                  |
| 10 - <20                       |                                                                                                                                             | 436              | <10 <sup>6</sup>                | <10 <sup>6</sup>                  | <10 <sup>6</sup>                    | <10 <sup>6</sup>                  |                  |
| 20 - <30                       |                                                                                                                                             | 7,163            | 53 (0.7)                        | 24 (45.3)                         | <10 <sup>6</sup>                    | 26 (49.1)                         |                  |
| 30 - <40                       |                                                                                                                                             | 7,381            | 108 (1.5)                       | 43 (39.8)                         | <10 <sup>6</sup>                    | 43 (39.8)                         |                  |
| 40 - <50                       | 4,180                                                                                                                                       | 148 (3.5)        | 40 (27.0)                       | <10 <sup>6</sup>                  | 40 (27.0)                           |                                   |                  |
| 50 - <60                       | 1,978                                                                                                                                       | 212 (10.7)       | 63 (29.7)                       | <10 <sup>6</sup>                  | 63 (29.7)                           |                                   |                  |
| 60 - <70                       | 701                                                                                                                                         | 131 (18.7)       | 42 (32.1)                       | <10 <sup>6</sup>                  | 43 (32.8)                           |                                   |                  |
| 70 - <80                       | 209                                                                                                                                         | 47 (22.5)        | 15 (31.9)                       | <10 <sup>6</sup>                  | 15 (31.9)                           |                                   |                  |
| 80 - <90                       | 45                                                                                                                                          | 13 (28.9)        | <10 <sup>6</sup>                | <10 <sup>6</sup>                  | <10 <sup>6</sup>                    |                                   |                  |
| 90 - <100                      | <10 <sup>6</sup>                                                                                                                            | <10 <sup>6</sup> | <10 <sup>6</sup>                | <10 <sup>6</sup>                  | <10 <sup>6</sup>                    |                                   |                  |
| 100 - <110                     | <10 <sup>6</sup>                                                                                                                            | <10 <sup>6</sup> | <10 <sup>6</sup>                | <10 <sup>6</sup>                  | <10 <sup>6</sup>                    |                                   |                  |
| 2019/20                        |                                                                                                                                             |                  |                                 |                                   |                                     |                                   |                  |
| 10 - <20                       | 404                                                                                                                                         | <10 <sup>6</sup> | <10 <sup>6</sup>                | <10 <sup>6</sup>                  | <10 <sup>6</sup>                    |                                   |                  |
| 20 - <30                       | 8,064                                                                                                                                       | 60 (0.7)         | 30 (50.0)                       | <10 <sup>6</sup>                  | 30 (50.0)                           |                                   |                  |
| 30 - <40                       | 9,125                                                                                                                                       | 100 (1.1)        | 40 (40.0)                       | <10 <sup>6</sup>                  | 40 (40.0)                           |                                   |                  |
| 40 - <50                       | 4,948                                                                                                                                       | 195 (3.9)        | 65 (33.3)                       | <10 <sup>6</sup>                  | 67 (34.4)                           |                                   |                  |
| 50 - <60                       | 2,224                                                                                                                                       | 193 (8.7)        | 56 (29.0)                       | <10 <sup>6</sup>                  | 57 (29.5)                           |                                   |                  |
| 60 - <70                       | 751                                                                                                                                         | 152 (20.2)       | 39 (25.7)                       | <10 <sup>6</sup>                  | 40 (26.3)                           |                                   |                  |
| 70 - <80                       | 238                                                                                                                                         | 57 (23.9)        | 21 (36.8)                       | <10 <sup>6</sup>                  | 22 (38.6)                           |                                   |                  |
| 80 - <90                       | 53                                                                                                                                          | 11 (20.8)        | <10 <sup>6</sup>                | <10 <sup>6</sup>                  | <10 <sup>6</sup>                    |                                   |                  |
| 90 - <100                      | <10 <sup>6</sup>                                                                                                                            | <10 <sup>6</sup> | <10 <sup>6</sup>                | <10 <sup>6</sup>                  | <10 <sup>6</sup>                    |                                   |                  |
| 100 - <110                     | <10 <sup>6</sup>                                                                                                                            | <10 <sup>6</sup> | <10 <sup>6</sup>                | <10 <sup>6</sup>                  | <10 <sup>6</sup>                    |                                   |                  |

Community achievement 2019/20: 68.01%  
(QOF 19/20 - for patients without moderate or severe frailty only)

<sup>1</sup>Eligible for indicator; <sup>2</sup>Achieve in current prison; <sup>3</sup>Achieve in previous prison; <sup>4</sup>Overall achievement - either current or previous prison; <sup>5</sup>Declined indicator; <sup>6</sup>Suppressed (<10) to avoid disclosure

Supplementary section 2: Descriptive statistics for each indicator

| Indicator                               | <i>The proportion of people with diabetes in whom the last blood pressure reading (measured in the preceding 12 months) is 140/80 mmHg or less</i> |                                 |                                   |                                     |                                   | Community achievement 2019/20: 68.01%<br>(QOF 19/20 - for patients without moderate or severe frailty only) |
|-----------------------------------------|----------------------------------------------------------------------------------------------------------------------------------------------------|---------------------------------|-----------------------------------|-------------------------------------|-----------------------------------|-------------------------------------------------------------------------------------------------------------|
| Group: Diabetes, Asthma & Epilepsy Care |                                                                                                                                                    |                                 |                                   |                                     |                                   |                                                                                                             |
| Variable                                | Population                                                                                                                                         | Eligible <sup>1</sup> (% popln) | Satisfy <sup>2</sup> (% eligible) | Elsewhere <sup>3</sup> (% eligible) | Achieve <sup>4</sup> (% eligible) |                                                                                                             |
| <b>Length of Stay (months)</b>          |                                                                                                                                                    |                                 |                                   |                                     |                                   |                                                                                                             |
| 2017/18                                 | <1                                                                                                                                                 | 4,474                           | 100 (2.2)                         | 31 (31.0)                           | <10 <sup>6</sup>                  | 32 (32.0)                                                                                                   |
|                                         | 1-<6                                                                                                                                               | 8,075                           | 187 (2.3)                         | 58 (31.0)                           | <10 <sup>6</sup>                  | 59 (31.6)                                                                                                   |
|                                         | 6-<12                                                                                                                                              | 3,672                           | 107 (2.9)                         | 37 (34.6)                           | <10 <sup>6</sup>                  | 37 (34.6)                                                                                                   |
|                                         | 12-<24                                                                                                                                             | 2,832                           | 98 (3.5)                          | 38 (38.8)                           | <10 <sup>6</sup>                  | 38 (38.8)                                                                                                   |
|                                         | 24+                                                                                                                                                | 2,624                           | 183 (7.0)                         | 66 (36.1)                           | <10 <sup>6</sup>                  | 66 (36.1)                                                                                                   |
| 2018/19                                 | <1                                                                                                                                                 | 4,801                           | 98 (2.0)                          | 22 (22.4)                           | <10 <sup>6</sup>                  | 23 (23.5)                                                                                                   |
|                                         | 1-<6                                                                                                                                               | 7,742                           | 184 (2.4)                         | 63 (34.2)                           | <10 <sup>6</sup>                  | 65 (35.3)                                                                                                   |
|                                         | 6-<12                                                                                                                                              | 3,616                           | 104 (2.9)                         | 35 (33.7)                           | <10 <sup>6</sup>                  | 35 (33.7)                                                                                                   |
|                                         | 12-<24                                                                                                                                             | 3,752                           | 138 (3.7)                         | 41 (29.7)                           | <10 <sup>6</sup>                  | 41 (29.7)                                                                                                   |
|                                         | 24+                                                                                                                                                | 2,188                           | 189 (8.6)                         | 76 (40.2)                           | <10 <sup>6</sup>                  | 76 (40.2)                                                                                                   |
| 2019/20                                 | <1                                                                                                                                                 | 6,764                           | 164 (2.4)                         | 65 (39.6)                           | <10 <sup>6</sup>                  | 65 (39.6)                                                                                                   |
|                                         | 1-<6                                                                                                                                               | 10,802                          | 254 (2.4)                         | 86 (33.9)                           | <10 <sup>6</sup>                  | 88 (34.6)                                                                                                   |
|                                         | 6-<12                                                                                                                                              | 3,893                           | 106 (2.7)                         | 30 (28.3)                           | <10 <sup>6</sup>                  | 33 (31.1)                                                                                                   |
|                                         | 12-<24                                                                                                                                             | 2,600                           | 96 (3.7)                          | 31 (32.3)                           | <10 <sup>6</sup>                  | 31 (32.3)                                                                                                   |
|                                         | 24+                                                                                                                                                | 1,752                           | 150 (8.6)                         | 44 (29.3)                           | <10 <sup>6</sup>                  | 44 (29.3)                                                                                                   |
| <b>Ethnic Group</b>                     |                                                                                                                                                    |                                 |                                   |                                     |                                   |                                                                                                             |
| 2017/18                                 | White                                                                                                                                              | 15,638                          | 529 (3.4)                         | 185 (35.0)                          | <10 <sup>6</sup>                  | 187 (35.3)                                                                                                  |
|                                         | Mixed                                                                                                                                              | 431                             | 15 (3.5)                          | <10 <sup>6</sup>                    | <10 <sup>6</sup>                  | <10 <sup>6</sup>                                                                                            |
|                                         | Asian or Asian British                                                                                                                             | 813                             | 28 (3.4)                          | <10 <sup>6</sup>                    | <10 <sup>6</sup>                  | <10 <sup>6</sup>                                                                                            |
|                                         | Black or Black British                                                                                                                             | 404                             | 15 (3.7)                          | <10 <sup>6</sup>                    | <10 <sup>6</sup>                  | <10 <sup>6</sup>                                                                                            |
|                                         | Chinese and Other                                                                                                                                  | 214                             | <10 <sup>6</sup>                  | <10 <sup>6</sup>                    | <10 <sup>6</sup>                  | <10 <sup>6</sup>                                                                                            |
|                                         | Unclassified                                                                                                                                       | 372                             | 13 (3.5)                          | <10 <sup>6</sup>                    | <10 <sup>6</sup>                  | <10 <sup>6</sup>                                                                                            |
| 2018/19                                 | White                                                                                                                                              | 14,911                          | 510 (3.4)                         | 162 (31.8)                          | <10 <sup>6</sup>                  | 165 (32.4)                                                                                                  |
|                                         | Mixed                                                                                                                                              | 371                             | 10 (2.7)                          | <10 <sup>6</sup>                    | <10 <sup>6</sup>                  | <10 <sup>6</sup>                                                                                            |
|                                         | Asian or Asian British                                                                                                                             | 726                             | 31 (4.3)                          | <10 <sup>6</sup>                    | <10 <sup>6</sup>                  | <10 <sup>6</sup>                                                                                            |
|                                         | Black or Black British                                                                                                                             | 364                             | 15 (4.1)                          | <10 <sup>6</sup>                    | <10 <sup>6</sup>                  | <10 <sup>6</sup>                                                                                            |
|                                         | Chinese and Other                                                                                                                                  | 167                             | <10 <sup>6</sup>                  | <10 <sup>6</sup>                    | <10 <sup>6</sup>                  | <10 <sup>6</sup>                                                                                            |
|                                         | Unclassified                                                                                                                                       | 409                             | <10 <sup>6</sup>                  | <10 <sup>6</sup>                    | <10 <sup>6</sup>                  | <10 <sup>6</sup>                                                                                            |
| 2019/20                                 | White                                                                                                                                              | 16,606                          | 499 (3.0)                         | 171 (34.3)                          | <10 <sup>6</sup>                  | 175 (35.1)                                                                                                  |
|                                         | Mixed                                                                                                                                              | 409                             | 11 (2.7)                          | <10 <sup>6</sup>                    | <10 <sup>6</sup>                  | <10 <sup>6</sup>                                                                                            |
|                                         | Asian or Asian British                                                                                                                             | 755                             | 46 (6.1)                          | 14 (30.4)                           | <10 <sup>6</sup>                  | 14 (30.4)                                                                                                   |
|                                         | Black or Black British                                                                                                                             | 451                             | 21 (4.7)                          | <10 <sup>6</sup>                    | <10 <sup>6</sup>                  | <10 <sup>6</sup>                                                                                            |
|                                         | Chinese and Other                                                                                                                                  | 163                             | <10 <sup>6</sup>                  | <10 <sup>6</sup>                    | <10 <sup>6</sup>                  | <10 <sup>6</sup>                                                                                            |
|                                         | Unclassified                                                                                                                                       | 387                             | <10 <sup>6</sup>                  | <10 <sup>6</sup>                    | <10 <sup>6</sup>                  | <10 <sup>6</sup>                                                                                            |

<sup>1</sup>Eligible for indicator; <sup>2</sup>Achieve in current prison; <sup>3</sup>Achieve in previous prison; <sup>4</sup>Overall achievement - either current or previous prison; <sup>5</sup>Declined indicator; <sup>6</sup>Suppressed (<10) to avoid disclosure

| <p>The proportion of people with diabetes who have had the following in the preceding 12 months: body mass index, blood pressure, record of smoking status, foot examination, urine albumin: creatinine ratio blood tests for HbA1c, cholesterol and serum creatinine</p> <p>Group: Diabetes, Asthma &amp; Epilepsy Care</p>             |           |            |                                    |                      |                        |                      |                        |                       |                      |                        |                      |                        |
|------------------------------------------------------------------------------------------------------------------------------------------------------------------------------------------------------------------------------------------------------------------------------------------------------------------------------------------|-----------|------------|------------------------------------|----------------------|------------------------|----------------------|------------------------|-----------------------|----------------------|------------------------|----------------------|------------------------|
| Indicator                                                                                                                                                                                                                                                                                                                                | Variable  | Population | Eligible <sup>1</sup><br>(% popln) | BMI (% eligible)     |                        | BP (% eligible)      |                        |                       | Hb1Ac (% eligible)   |                        | Chol (% eligible)    |                        |
|                                                                                                                                                                                                                                                                                                                                          |           |            |                                    | Satisfy <sup>2</sup> | Elsewhere <sup>3</sup> | Satisfy <sup>2</sup> | Elsewhere <sup>3</sup> | Declined <sup>5</sup> | Satisfy <sup>2</sup> | Elsewhere <sup>3</sup> | Satisfy <sup>2</sup> | Elsewhere <sup>3</sup> |
| <p>68.01% of those without moderate or severe frailty have BP of 140/80 or less, 56.66% of those without moderate or severe frailty have HbA1c of 58 or less, 83.34% of those with moderate or severe frailty have HbA1c of 75 or less, 78.04% had foot examination with risk classification. No comparisons for other examinations.</p> |           |            |                                    |                      |                        |                      |                        |                       |                      |                        |                      |                        |
| <b>Year</b>                                                                                                                                                                                                                                                                                                                              |           |            |                                    |                      |                        |                      |                        |                       |                      |                        |                      |                        |
|                                                                                                                                                                                                                                                                                                                                          | 2017/18   | 21,677     | 675 (3.1)                          | 490 (72.6)           | <10 <sup>6</sup>       | 548 (81.2)           | 25 (3.7)               | <10 <sup>6</sup>      | 388 (57.5)           | 43 (6.4)               | 313 (46.4)           | 36 (5.3)               |
|                                                                                                                                                                                                                                                                                                                                          | 2018/19   | 22,099     | 713 (3.2)                          | 589 (82.6)           | <10 <sup>6</sup>       | 624 (87.5)           | 12 (1.7)               | <10 <sup>6</sup>      | 429 (60.2)           | 30 (4.2)               | 363 (50.9)           | 27 (3.8)               |
|                                                                                                                                                                                                                                                                                                                                          | 2019/20   | 25,811     | 770 (3.0)                          | 658 (85.5)           | <10 <sup>6</sup>       | 718 (93.2)           | <10 <sup>6</sup>       | <10 <sup>6</sup>      | 470 (61.0)           | 32 (4.2)               | 408 (53.0)           | 21 (2.7)               |
| <b>Prison</b>                                                                                                                                                                                                                                                                                                                            |           |            |                                    |                      |                        |                      |                        |                       |                      |                        |                      |                        |
|                                                                                                                                                                                                                                                                                                                                          | 2017/18   |            |                                    |                      |                        |                      |                        |                       |                      |                        |                      |                        |
|                                                                                                                                                                                                                                                                                                                                          | Prison 1  | 1,323      | 25 (1.9)                           | 22 (88.0)            | <10 <sup>6</sup>       | 21 (84.0)            | <10 <sup>6</sup>       | <10 <sup>6</sup>      | 16 (64.0)            | <10 <sup>6</sup>       | 13 (52.0)            | <10 <sup>6</sup>       |
|                                                                                                                                                                                                                                                                                                                                          | Prison 2  | 3,261      | 96 (2.9)                           | 68 (70.8)            | <10 <sup>6</sup>       | 82 (85.4)            | <10 <sup>6</sup>       | <10 <sup>6</sup>      | 50 (52.1)            | <10 <sup>6</sup>       | 38 (39.6)            | <10 <sup>6</sup>       |
|                                                                                                                                                                                                                                                                                                                                          | Prison 3  | 2,623      | 70 (2.7)                           | 57 (81.4)            | <10 <sup>6</sup>       | 60 (85.7)            | <10 <sup>6</sup>       | <10 <sup>6</sup>      | 34 (48.6)            | 17 (24.3)              | 18 (25.7)            | 13 (18.6)              |
|                                                                                                                                                                                                                                                                                                                                          | Prison 4  | 2,089      | 68 (3.3)                           | 51 (75.0)            | <10 <sup>6</sup>       | 54 (79.4)            | <10 <sup>6</sup>       | <10 <sup>6</sup>      | 48 (70.6)            | <10 <sup>6</sup>       | 44 (64.7)            | <10 <sup>6</sup>       |
|                                                                                                                                                                                                                                                                                                                                          | Prison 5  | 637        | 22 (3.5)                           | 15 (68.2)            | <10 <sup>6</sup>       | 16 (72.7)            | <10 <sup>6</sup>       | <10 <sup>6</sup>      | 12 (54.5)            | <10 <sup>6</sup>       | <10 <sup>6</sup>     | <10 <sup>6</sup>       |
|                                                                                                                                                                                                                                                                                                                                          | Prison 6  | 1,552      | 54 (3.5)                           | 46 (85.2)            | <10 <sup>6</sup>       | 53 (98.1)            | <10 <sup>6</sup>       | <10 <sup>6</sup>      | 41 (75.9)            | <10 <sup>6</sup>       | 36 (66.7)            | <10 <sup>6</sup>       |
|                                                                                                                                                                                                                                                                                                                                          | Prison 7  | 635        | 21 (3.3)                           | 19 (90.5)            | <10 <sup>6</sup>       | 19 (90.5)            | <10 <sup>6</sup>       | <10 <sup>6</sup>      | 8 (38.1)             | <10 <sup>6</sup>       | 11 (52.4)            | <10 <sup>6</sup>       |
|                                                                                                                                                                                                                                                                                                                                          | Prison 8  | 1,085      | 29 (2.7)                           | 19 (65.5)            | <10 <sup>6</sup>       | 24 (82.8)            | <10 <sup>6</sup>       | <10 <sup>6</sup>      | 15 (51.7)            | <10 <sup>6</sup>       | 10 (34.5)            | <10 <sup>6</sup>       |
|                                                                                                                                                                                                                                                                                                                                          | Prison 9  | 981        | 86 (8.8)                           | 62 (72.1)            | <10 <sup>6</sup>       | 73 (84.9)            | <10 <sup>6</sup>       | <10 <sup>6</sup>      | 73 (84.9)            | <10 <sup>6</sup>       | 66 (76.7)            | <10 <sup>6</sup>       |
|                                                                                                                                                                                                                                                                                                                                          | Prison 10 | 2,523      | 75 (3.0)                           | 39 (52.0)            | <10 <sup>6</sup>       | 62 (82.7)            | <10 <sup>6</sup>       | <10 <sup>6</sup>      | 25 (33.3)            | <10 <sup>6</sup>       | 19 (25.3)            | <10 <sup>6</sup>       |
|                                                                                                                                                                                                                                                                                                                                          | Prison 11 | 3,470      | 83 (2.4)                           | 54 (65.1)            | <10 <sup>6</sup>       | 43 (51.8)            | <10 <sup>6</sup>       | <10 <sup>6</sup>      | 27 (32.5)            | <10 <sup>6</sup>       | 13 (15.7)            | <10 <sup>6</sup>       |
|                                                                                                                                                                                                                                                                                                                                          | Prison 12 | 815        | <10 <sup>6</sup>                   | <10 <sup>6</sup>     | <10 <sup>6</sup>       | <10 <sup>6</sup>     | <10 <sup>6</sup>       | <10 <sup>6</sup>      | <10 <sup>6</sup>     | <10 <sup>6</sup>       | <10 <sup>6</sup>     | <10 <sup>6</sup>       |
|                                                                                                                                                                                                                                                                                                                                          | Prison 13 | 683        | 42 (6.1)                           | 34 (81.0)            | <10 <sup>6</sup>       | 37 (88.1)            | <10 <sup>6</sup>       | <10 <sup>6</sup>      | 35 (83.3)            | <10 <sup>6</sup>       | 35 (83.3)            | <10 <sup>6</sup>       |
|                                                                                                                                                                                                                                                                                                                                          | 2018/19   |            |                                    |                      |                        |                      |                        |                       |                      |                        |                      |                        |
|                                                                                                                                                                                                                                                                                                                                          | Prison 1  | 1,333      | 19 (1.4)                           | 16 (84.2)            | <10 <sup>6</sup>       | 17 (89.5)            | <10 <sup>6</sup>       | <10 <sup>6</sup>      | 17 (89.5)            | <10 <sup>6</sup>       | 16 (84.2)            | <10 <sup>6</sup>       |
|                                                                                                                                                                                                                                                                                                                                          | Prison 2  | 2,705      | 73 (2.7)                           | 60 (82.2)            | <10 <sup>6</sup>       | 66 (90.4)            | <10 <sup>6</sup>       | <10 <sup>6</sup>      | 34 (46.6)            | <10 <sup>6</sup>       | 26 (35.6)            | <10 <sup>6</sup>       |
|                                                                                                                                                                                                                                                                                                                                          | Prison 3  | 2,522      | 85 (3.4)                           | 69 (81.2)            | <10 <sup>6</sup>       | 74 (87.1)            | <10 <sup>6</sup>       | <10 <sup>6</sup>      | 52 (61.2)            | <10 <sup>6</sup>       | 45 (52.9)            | <10 <sup>6</sup>       |
|                                                                                                                                                                                                                                                                                                                                          | Prison 4  | 2,349      | 76 (3.2)                           | 58 (76.3)            | <10 <sup>6</sup>       | 43 (56.6)            | <10 <sup>6</sup>       | <10 <sup>6</sup>      | 54 (71.1)            | <10 <sup>6</sup>       | 54 (71.1)            | <10 <sup>6</sup>       |
|                                                                                                                                                                                                                                                                                                                                          | Prison 5  | 676        | 22 (3.3)                           | 12 (54.5)            | <10 <sup>6</sup>       | 17 (77.3)            | <10 <sup>6</sup>       | <10 <sup>6</sup>      | 12 (54.5)            | <10 <sup>6</sup>       | 11 (50.0)            | <10 <sup>6</sup>       |
|                                                                                                                                                                                                                                                                                                                                          | Prison 6  | 1,513      | 48 (3.2)                           | 43 (89.6)            | <10 <sup>6</sup>       | 48 (100.0)           | <10 <sup>6</sup>       | <10 <sup>6</sup>      | 32 (66.7)            | <10 <sup>6</sup>       | 29 (60.4)            | <10 <sup>6</sup>       |
|                                                                                                                                                                                                                                                                                                                                          | Prison 7  | 654        | 19 (2.9)                           | 16 (84.2)            | <10 <sup>6</sup>       | 18 (94.7)            | <10 <sup>6</sup>       | <10 <sup>6</sup>      | 14 (73.7)            | <10 <sup>6</sup>       | 10 (52.6)            | <10 <sup>6</sup>       |
|                                                                                                                                                                                                                                                                                                                                          | Prison 8  | 1,148      | 34 (3.0)                           | 24 (70.6)            | <10 <sup>6</sup>       | 32 (94.1)            | <10 <sup>6</sup>       | <10 <sup>6</sup>      | 17 (50.0)            | <10 <sup>6</sup>       | <10 <sup>6</sup>     | <10 <sup>6</sup>       |
|                                                                                                                                                                                                                                                                                                                                          | Prison 9  | 996        | 105 (10.5)                         | 97 (92.4)            | <10 <sup>6</sup>       | 100 (95.2)           | <10 <sup>6</sup>       | <10 <sup>6</sup>      | 95 (90.5)            | <10 <sup>6</sup>       | 90 (85.7)            | <10 <sup>6</sup>       |
|                                                                                                                                                                                                                                                                                                                                          | Prison 10 | 2,717      | 77 (2.8)                           | 54 (70.1)            | <10 <sup>6</sup>       | 62 (80.5)            | <10 <sup>6</sup>       | <10 <sup>6</sup>      | 33 (42.9)            | <10 <sup>6</sup>       | 23 (29.9)            | <10 <sup>6</sup>       |
|                                                                                                                                                                                                                                                                                                                                          | Prison 11 | 4,020      | 113 (2.8)                          | 99 (87.6)            | <10 <sup>6</sup>       | 106 (93.8)           | <10 <sup>6</sup>       | <10 <sup>6</sup>      | 30 (26.5)            | <10 <sup>6</sup>       | 15 (13.3)            | <10 <sup>6</sup>       |
|                                                                                                                                                                                                                                                                                                                                          | Prison 12 | 792        | <10 <sup>6</sup>                   | <10 <sup>6</sup>     | <10 <sup>6</sup>       | <10 <sup>6</sup>     | <10 <sup>6</sup>       | <10 <sup>6</sup>      | <10 <sup>6</sup>     | 12 (10.6)              | <10 <sup>6</sup>     | <10 <sup>6</sup>       |
|                                                                                                                                                                                                                                                                                                                                          | Prison 13 | 674        | 39 (5.8)                           | 38 (97.4)            | <10 <sup>6</sup>       | 38 (97.4)            | <10 <sup>6</sup>       | <10 <sup>6</sup>      | 36 (92.3)            | <10 <sup>6</sup>       | 36 (92.3)            | <10 <sup>6</sup>       |
|                                                                                                                                                                                                                                                                                                                                          | 2019/20   |            |                                    |                      |                        |                      |                        |                       |                      |                        |                      |                        |
|                                                                                                                                                                                                                                                                                                                                          | Prison 1  | 1,410      | 37 (2.6)                           | 31 (83.8)            | <10 <sup>6</sup>       | 33 (89.2)            | <10 <sup>6</sup>       | <10 <sup>6</sup>      | 24 (64.9)            | <10 <sup>6</sup>       | 21 (56.8)            | <10 <sup>6</sup>       |
|                                                                                                                                                                                                                                                                                                                                          | Prison 2  | 2,979      | 77 (2.6)                           | 69 (89.6)            | <10 <sup>6</sup>       | 72 (93.5)            | <10 <sup>6</sup>       | <10 <sup>6</sup>      | 50 (64.9)            | <10 <sup>6</sup>       | 43 (55.8)            | <10 <sup>6</sup>       |
|                                                                                                                                                                                                                                                                                                                                          | Prison 3  | 2,809      | 88 (3.1)                           | 64 (72.7)            | <10 <sup>6</sup>       | 84 (95.5)            | <10 <sup>6</sup>       | <10 <sup>6</sup>      | 58 (65.9)            | <10 <sup>6</sup>       | 53 (60.2)            | <10 <sup>6</sup>       |
|                                                                                                                                                                                                                                                                                                                                          | Prison 4  | 2,651      | <10 <sup>6</sup>                   | <10 <sup>6</sup>     | <10 <sup>6</sup>       | <10 <sup>6</sup>     | <10 <sup>6</sup>       | <10 <sup>6</sup>      | <10 <sup>6</sup>     | <10 <sup>6</sup>       | <10 <sup>6</sup>     | <10 <sup>6</sup>       |
|                                                                                                                                                                                                                                                                                                                                          | Prison 5  | 616        | 25 (4.1)                           | 21 (84.0)            | <10 <sup>6</sup>       | 22 (88.0)            | <10 <sup>6</sup>       | <10 <sup>6</sup>      | 17 (68.0)            | <10 <sup>6</sup>       | 11 (44.0)            | <10 <sup>6</sup>       |
|                                                                                                                                                                                                                                                                                                                                          | Prison 6  | 1,533      | 51 (3.3)                           | 49 (96.1)            | <10 <sup>6</sup>       | 51 (100.0)           | <10 <sup>6</sup>       | <10 <sup>6</sup>      | 32 (62.7)            | <10 <sup>6</sup>       | 28 (54.9)            | <10 <sup>6</sup>       |
|                                                                                                                                                                                                                                                                                                                                          | Prison 7  | 860        | 29 (3.4)                           | 25 (86.2)            | <10 <sup>6</sup>       | 26 (89.7)            | <10 <sup>6</sup>       | <10 <sup>6</sup>      | 19 (65.5)            | <10 <sup>6</sup>       | 19 (65.5)            | <10 <sup>6</sup>       |
|                                                                                                                                                                                                                                                                                                                                          | Prison 8  | 1,385      | 44 (3.2)                           | 35 (79.5)            | <10 <sup>6</sup>       | 41 (93.2)            | <10 <sup>6</sup>       | <10 <sup>6</sup>      | 21 (47.7)            | <10 <sup>6</sup>       | 12 (27.3)            | <10 <sup>6</sup>       |
|                                                                                                                                                                                                                                                                                                                                          | Prison 9  | 1,092      | 128 (11.7)                         | 121 (94.5)           | <10 <sup>6</sup>       | 126 (98.4)           | <10 <sup>6</sup>       | <10 <sup>6</sup>      | 108 (84.4)           | <10 <sup>6</sup>       | 105 (82.0)           | <10 <sup>6</sup>       |
|                                                                                                                                                                                                                                                                                                                                          | Prison 10 | 3,577      | 97 (2.7)                           | 68 (70.1)            | <10 <sup>6</sup>       | 81 (83.5)            | <10 <sup>6</sup>       | <10 <sup>6</sup>      | 52 (53.6)            | <10 <sup>6</sup>       | 42 (43.3)            | <10 <sup>6</sup>       |
|                                                                                                                                                                                                                                                                                                                                          | Prison 11 | 5,348      | 138 (2.6)                          | 125 (90.6)           | <10 <sup>6</sup>       | 128 (92.8)           | <10 <sup>6</sup>       | <10 <sup>6</sup>      | 41 (29.7)            | <10 <sup>6</sup>       | 27 (19.6)            | <10 <sup>6</sup>       |
|                                                                                                                                                                                                                                                                                                                                          | Prison 12 | 805        | <10 <sup>6</sup>                   | <10 <sup>6</sup>     | <10 <sup>6</sup>       | <10 <sup>6</sup>     | <10 <sup>6</sup>       | <10 <sup>6</sup>      | <10 <sup>6</sup>     | <10 <sup>6</sup>       | <10 <sup>6</sup>     | <10 <sup>6</sup>       |
|                                                                                                                                                                                                                                                                                                                                          | Prison 13 | 746        | 46 (6.2)                           | 41 (89.1)            | <10 <sup>6</sup>       | 45 (97.8)            | <10 <sup>6</sup>       | <10 <sup>6</sup>      | 42 (91.3)            | <10 <sup>6</sup>       | 40 (87.0)            | <10 <sup>6</sup>       |
| <b>Prison category</b>                                                                                                                                                                                                                                                                                                                   |           |            |                                    |                      |                        |                      |                        |                       |                      |                        |                      |                        |
|                                                                                                                                                                                                                                                                                                                                          | 2017/18   |            |                                    |                      |                        |                      |                        |                       |                      |                        |                      |                        |
|                                                                                                                                                                                                                                                                                                                                          | A         | 1,664      | 128 (7.7)                          | 96 (75.0)            | <10 <sup>6</sup>       | 110 (85.9)           | <10 <sup>6</sup>       | <10 <sup>6</sup>      | 108 (84.4)           | <10 <sup>6</sup>       | 101 (78.9)           | <10 <sup>6</sup>       |
|                                                                                                                                                                                                                                                                                                                                          | B         | 9,254      | 254 (2.7)                          | 161 (63.4)           | <10 <sup>6</sup>       | 187 (73.6)           | <10 <sup>6</sup>       | <10 <sup>6</sup>      | 102 (40.2)           | 13 (5.1)               | 70 (27.6)            | 10 (3.9)               |
|                                                                                                                                                                                                                                                                                                                                          | C         | 6,035      | 163 (2.7)                          | 130 (79.8)           | <10 <sup>6</sup>       | 135 (82.8)           | <10 <sup>6</sup>       | <10 <sup>6</sup>      | 98 (60.1)            | 22 (13.5)              | 75 (46.0)            | 17 (10.4)              |
|                                                                                                                                                                                                                                                                                                                                          | Closed    | 1,720      | 50 (2.9)                           | 38 (76.0)            | <10 <sup>6</sup>       | 43 (86.0)            | <10 <sup>6</sup>       | <10 <sup>6</sup>      | 23 (46.0)            | <10 <sup>6</sup>       | 21 (42.0)            | <10 <sup>6</sup>       |
|                                                                                                                                                                                                                                                                                                                                          | D         | 2,189      | 76 (3.5)                           | 61 (80.3)            | <10 <sup>6</sup>       | 69 (90.8)            | <10 <sup>6</sup>       | <10 <sup>6</sup>      | 53 (69.7)            | <10 <sup>6</sup>       | 45 (59.2)            | <10 <sup>6</sup>       |
|                                                                                                                                                                                                                                                                                                                                          | YOI       | 815        | <10 <sup>6</sup>                   | <10 <sup>6</sup>     | <10 <sup>6</sup>       | <10 <sup>6</sup>     | <10 <sup>6</sup>       | <10 <sup>6</sup>      | <10 <sup>6</sup>     | <10 <sup>6</sup>       | <10 <sup>6</sup>     | <10 <sup>6</sup>       |
|                                                                                                                                                                                                                                                                                                                                          | 2018/19   |            |                                    |                      |                        |                      |                        |                       |                      |                        |                      |                        |
|                                                                                                                                                                                                                                                                                                                                          | A         | 1,670      | 144 (8.6)                          | 135 (93.8)           | <10 <sup>6</sup>       | 138 (95.8)           | <10 <sup>6</sup>       | <10 <sup>6</sup>      | 131 (91.0)           | <10 <sup>6</sup>       | 126 (87.5)           | <10 <sup>6</sup>       |
|                                                                                                                                                                                                                                                                                                                                          | B         | 9,442      | 263 (2.8)                          | 213 (81.0)           | <10 <sup>6</sup>       | 234 (89.0)           | <10 <sup>6</sup>       | <10 <sup>6</sup>      | 97 (36.9)            | 15 (5.7)               | 64 (24.3)            | 12 (4.6)               |
|                                                                                                                                                                                                                                                                                                                                          | C         | 6,204      | 180 (2.9)                          | 143 (79.4)           | <10 <sup>6</sup>       | 134 (74.4)           | <10 <sup>6</sup>       | <10 <sup>6</sup>      | 123 (68.3)           | <10 <sup>6</sup>       | 115 (63.9)           | <10 <sup>6</sup>       |
|                                                                                                                                                                                                                                                                                                                                          | Closed    | 1,802      | 53 (2.9)                           | 40 (75.5)            | <10 <sup>6</sup>       | 50 (94.3)            | <10 <sup>6</sup>       | <10 <sup>6</sup>      | 31 (58.5)            | <10 <sup>6</sup>       | 16 (30.2)            | <10 <sup>6</sup>       |
|                                                                                                                                                                                                                                                                                                                                          | D         | 2,189      | 70 (3.2)                           | 55 (78.6)            | <10 <sup>6</sup>       | 65 (92.9)            | <10 <sup>6</sup>       | <10 <sup>6</sup>      | 44 (62.9)            | <10 <sup>6</sup>       | 40 (57.1)            | <10 <sup>6</sup>       |
|                                                                                                                                                                                                                                                                                                                                          | YOI       | 792        | <10 <sup>6</sup>                   | <10 <sup>6</sup>     | <10 <sup>6</sup>       | <10 <sup>6</sup>     | <10 <sup>6</sup>       | <10 <sup>6</sup>      | <10 <sup>6</sup>     | <10 <sup>6</sup>       | <10 <sup>6</sup>     | <10 <sup>6</sup>       |
|                                                                                                                                                                                                                                                                                                                                          | 2019/20   |            |                                    |                      |                        |                      |                        |                       |                      |                        |                      |                        |
|                                                                                                                                                                                                                                                                                                                                          | A         | 1,838      | 174 (9.5)                          | 162 (93.1)           | <10 <sup>6</sup>       | 171 (98.3)           | <10 <sup>6</sup>       | <10 <sup>6</sup>      | 150 (86.2)           | <10 <sup>6</sup>       | 145 (83.3)           | <10 <sup>6</sup>       |
|                                                                                                                                                                                                                                                                                                                                          | B         | 11,904     | 312 (2.6)                          | 262 (84.0)           | <10 <sup>6</sup>       | 281 (90.1)           | <10 <sup>6</sup>       | <10 <sup>6</sup>      | 143 (45.8)           | <10 <sup>6</sup>       | 112 (35.9)           | <10 <sup>6</sup>       |
|                                                                                                                                                                                                                                                                                                                                          | C         | 6,870      | 131 (1.9)                          | 101 (77.1)           | <10 <sup>6</sup>       | 123 (93.9)           | <10 <sup>6</sup>       | <10 <sup>6</sup>      | 87 (66.4)            | 10 (7.6)               | 80 (61.1)            | <10 <sup>6</sup>       |
|                                                                                                                                                                                                                                                                                                                                          | Closed    | 2,245      | 73 (3.3)                           | 60 (82.2)            | <10 <sup>6</sup>       | 67 (91.8)            | <10 <sup>6</sup>       | <10 <sup>6</sup>      | 40 (54.8)            | <10 <sup>6</sup>       | 31 (42.5)            | <10 <sup>6</sup>       |
|                                                                                                                                                                                                                                                                                                                                          | D         | 2,149      | 76 (3.5)                           | 70 (92.1)            | <10 <sup>6</sup>       | 73 (96.1)            | <10 <sup>6</sup>       | <10 <sup>6</sup>      | 49 (64.5)            | <10 <sup>6</sup>       | 39 (51.3)            | <10 <sup>6</sup>       |
|                                                                                                                                                                                                                                                                                                                                          | YOI       | 805        | <10 <sup>6</sup>                   | <10 <sup>6</sup>     | <10 <sup>6</sup>       | <10 <sup>6</sup>     | <10 <sup>6</sup>       | <10 <sup>6</sup>      | <10 <sup>6</sup>     | <10 <sup>6</sup>       | <10 <sup>6</sup>     | <10 <sup>6</sup>       |

<sup>1</sup>Eligible for indicator; <sup>2</sup>Achieve in current prison; <sup>3</sup>Achieve in previous prison; <sup>4</sup>Overall achievement - either current or previous prison; <sup>5</sup>Declined indicator; <sup>6</sup>Suppressed (<10) to avoid disclosure

The proportion of people with diabetes who have had the following in the preceding 12 months: body mass index, blood pressure, record of smoking status, foot examination, urine albumin: creatinine ratio blood tests for HbA1c, cholesterol and serum creatinine

68.01% of those without moderate or severe frailty have BP of 140/80 or less, 56.66% of those without moderate or severe frailty have HbA1c of 58 or less, 83.34% of those with moderate or severe frailty have HbA1c of 75 or less, 78.04% had foot examination with risk classification. No comparisons for other examinations.

Group: Diabetes, Asthma & Epilepsy Care

| Indicator              | Variable  | Smoke Status (% eligible) |                      |                        | Foot Exam (% eligible) |                        |                       | Ibumin Creatinine Ratio (% eligible) |                        | Serum Creatinine (% eligible) |                        |
|------------------------|-----------|---------------------------|----------------------|------------------------|------------------------|------------------------|-----------------------|--------------------------------------|------------------------|-------------------------------|------------------------|
|                        |           | Eligible <sup>1</sup>     | Satisfy <sup>2</sup> | Elsewhere <sup>3</sup> | Satisfy <sup>2</sup>   | Elsewhere <sup>3</sup> | Declined <sup>5</sup> | Satisfy <sup>2</sup>                 | Elsewhere <sup>3</sup> | Satisfy <sup>2</sup>          | Elsewhere <sup>3</sup> |
| Year                   |           |                           |                      |                        |                        |                        |                       |                                      |                        |                               |                        |
|                        | 2017/18   | 675                       | 535 (79.3)           | <10 <sup>6</sup>       | 235 (34.8)             | 23 (3.4)               | <10 <sup>6</sup>      | 154 (22.8)                           | 19 (2.8)               | 12 (1.8)                      | <10 <sup>6</sup>       |
|                        | 2018/19   | 713                       | 595 (83.5)           | 16 (2.2)               | 250 (35.1)             | 26 (3.6)               | <10 <sup>6</sup>      | 183 (25.7)                           | 23 (3.2)               | <10 <sup>6</sup>              | <10 <sup>6</sup>       |
|                        | 2019/20   | 770                       | 629 (81.7)           | 13 (1.7)               | 278 (36.1)             | 34 (4.4)               | <10 <sup>6</sup>      | 172 (22.3)                           | 22 (2.9)               | <10 <sup>6</sup>              | <10 <sup>6</sup>       |
| <b>Prison</b>          |           |                           |                      |                        |                        |                        |                       |                                      |                        |                               |                        |
| 2017/18                | Prison 1  | 25                        | 20 (80.0)            | <10 <sup>6</sup>       | 11 (44.0)              | <10 <sup>6</sup>       | <10 <sup>6</sup>      | <10 <sup>6</sup>                     | <10 <sup>6</sup>       | <10 <sup>6</sup>              | <10 <sup>6</sup>       |
|                        | Prison 2  | 96                        | 72 (75.0)            | <10 <sup>6</sup>       | 34 (35.4)              | <10 <sup>6</sup>       | <10 <sup>6</sup>      | 19 (19.8)                            | <10 <sup>6</sup>       | <10 <sup>6</sup>              | <10 <sup>6</sup>       |
|                        | Prison 3  | 70                        | 56 (80.0)            | <10 <sup>6</sup>       | 22 (31.4)              | <10 <sup>6</sup>       | <10 <sup>6</sup>      | 24 (34.3)                            | <10 <sup>6</sup>       | <10 <sup>6</sup>              | <10 <sup>6</sup>       |
|                        | Prison 4  | 68                        | 50 (73.5)            | <10 <sup>6</sup>       | 18 (26.5)              | <10 <sup>6</sup>       | <10 <sup>6</sup>      | 13 (19.1)                            | <10 <sup>6</sup>       | <10 <sup>6</sup>              | <10 <sup>6</sup>       |
|                        | Prison 5  | 22                        | 14 (63.6)            | <10 <sup>6</sup>       | <10 <sup>6</sup>       | <10 <sup>6</sup>       | <10 <sup>6</sup>      | <10 <sup>6</sup>                     | <10 <sup>6</sup>       | <10 <sup>6</sup>              | <10 <sup>6</sup>       |
|                        | Prison 6  | 54                        | 47 (87.0)            | <10 <sup>6</sup>       | 36 (66.7)              | <10 <sup>6</sup>       | <10 <sup>6</sup>      | 24 (44.4)                            | <10 <sup>6</sup>       | <10 <sup>6</sup>              | <10 <sup>6</sup>       |
|                        | Prison 7  | 21                        | 17 (81.0)            | <10 <sup>6</sup>       | <10 <sup>6</sup>       | <10 <sup>6</sup>       | <10 <sup>6</sup>      | <10 <sup>6</sup>                     | <10 <sup>6</sup>       | <10 <sup>6</sup>              | <10 <sup>6</sup>       |
|                        | Prison 8  | 29                        | 25 (86.2)            | <10 <sup>6</sup>       | 12 (41.4)              | <10 <sup>6</sup>       | <10 <sup>6</sup>      | <10 <sup>6</sup>                     | <10 <sup>6</sup>       | <10 <sup>6</sup>              | <10 <sup>6</sup>       |
|                        | Prison 9  | 86                        | 74 (86.0)            | <10 <sup>6</sup>       | 40 (46.5)              | <10 <sup>6</sup>       | <10 <sup>6</sup>      | 26 (30.2)                            | <10 <sup>6</sup>       | <10 <sup>6</sup>              | <10 <sup>6</sup>       |
|                        | Prison 10 | 75                        | 62 (82.7)            | <10 <sup>6</sup>       | 16 (21.3)              | <10 <sup>6</sup>       | <10 <sup>6</sup>      | <10 <sup>6</sup>                     | <10 <sup>6</sup>       | <10 <sup>6</sup>              | <10 <sup>6</sup>       |
|                        | Prison 11 | 83                        | 56 (67.5)            | <10 <sup>6</sup>       | <10 <sup>6</sup>       | <10 <sup>6</sup>       | <10 <sup>6</sup>      | <10 <sup>6</sup>                     | <10 <sup>6</sup>       | <10 <sup>6</sup>              | <10 <sup>6</sup>       |
|                        | Prison 12 | <10 <sup>6</sup>          | <10 <sup>6</sup>     | <10 <sup>6</sup>       | <10 <sup>6</sup>       | <10 <sup>6</sup>       | <10 <sup>6</sup>      | <10 <sup>6</sup>                     | <10 <sup>6</sup>       | <10 <sup>6</sup>              | <10 <sup>6</sup>       |
|                        | Prison 13 | 42                        | 38 (90.5)            | <10 <sup>6</sup>       | 34 (81.0)              | <10 <sup>6</sup>       | <10 <sup>6</sup>      | 32 (76.2)                            | <10 <sup>6</sup>       | <10 <sup>6</sup>              | <10 <sup>6</sup>       |
| 2018/19                | Prison 1  | 19                        | 15 (78.9)            | <10 <sup>6</sup>       | 13 (68.4)              | <10 <sup>6</sup>       | <10 <sup>6</sup>      | <10 <sup>6</sup>                     | <10 <sup>6</sup>       | <10 <sup>6</sup>              | <10 <sup>6</sup>       |
|                        | Prison 2  | 73                        | 65 (89.0)            | <10 <sup>6</sup>       | 30 (41.1)              | <10 <sup>6</sup>       | <10 <sup>6</sup>      | 10 (13.7)                            | <10 <sup>6</sup>       | <10 <sup>6</sup>              | <10 <sup>6</sup>       |
|                        | Prison 3  | 85                        | 60 (70.6)            | <10 <sup>6</sup>       | 26 (30.6)              | <10 <sup>6</sup>       | <10 <sup>6</sup>      | 17 (20.0)                            | <10 <sup>6</sup>       | <10 <sup>6</sup>              | <10 <sup>6</sup>       |
|                        | Prison 4  | 76                        | 55 (72.4)            | <10 <sup>6</sup>       | 23 (30.3)              | <10 <sup>6</sup>       | <10 <sup>6</sup>      | 39 (51.3)                            | <10 <sup>6</sup>       | <10 <sup>6</sup>              | <10 <sup>6</sup>       |
|                        | Prison 5  | 22                        | 17 (77.3)            | <10 <sup>6</sup>       | <10 <sup>6</sup>       | <10 <sup>6</sup>       | <10 <sup>6</sup>      | <10 <sup>6</sup>                     | <10 <sup>6</sup>       | <10 <sup>6</sup>              | <10 <sup>6</sup>       |
|                        | Prison 6  | 48                        | 41 (85.4)            | <10 <sup>6</sup>       | 29 (60.4)              | <10 <sup>6</sup>       | <10 <sup>6</sup>      | 16 (33.3)                            | <10 <sup>6</sup>       | <10 <sup>6</sup>              | <10 <sup>6</sup>       |
|                        | Prison 7  | 19                        | 17 (89.5)            | <10 <sup>6</sup>       | <10 <sup>6</sup>       | <10 <sup>6</sup>       | <10 <sup>6</sup>      | <10 <sup>6</sup>                     | <10 <sup>6</sup>       | <10 <sup>6</sup>              | <10 <sup>6</sup>       |
|                        | Prison 8  | 34                        | 25 (73.5)            | <10 <sup>6</sup>       | <10 <sup>6</sup>       | <10 <sup>6</sup>       | <10 <sup>6</sup>      | <10 <sup>6</sup>                     | <10 <sup>6</sup>       | <10 <sup>6</sup>              | <10 <sup>6</sup>       |
|                        | Prison 9  | 105                       | 100 (95.2)           | <10 <sup>6</sup>       | 68 (64.8)              | <10 <sup>6</sup>       | <10 <sup>6</sup>      | 40 (38.1)                            | <10 <sup>6</sup>       | <10 <sup>6</sup>              | <10 <sup>6</sup>       |
|                        | Prison 10 | 77                        | 61 (79.2)            | <10 <sup>6</sup>       | <10 <sup>6</sup>       | <10 <sup>6</sup>       | <10 <sup>6</sup>      | <10 <sup>6</sup>                     | <10 <sup>6</sup>       | <10 <sup>6</sup>              | <10 <sup>6</sup>       |
|                        | Prison 11 | 113                       | 98 (86.7)            | <10 <sup>6</sup>       | <10 <sup>6</sup>       | <10 <sup>6</sup>       | <10 <sup>6</sup>      | <10 <sup>6</sup>                     | <10 <sup>6</sup>       | <10 <sup>6</sup>              | <10 <sup>6</sup>       |
|                        | Prison 12 | <10 <sup>6</sup>          | <10 <sup>6</sup>     | <10 <sup>6</sup>       | <10 <sup>6</sup>       | <10 <sup>6</sup>       | <10 <sup>6</sup>      | <10 <sup>6</sup>                     | <10 <sup>6</sup>       | <10 <sup>6</sup>              | <10 <sup>6</sup>       |
|                        | Prison 13 | 39                        | 38 (97.4)            | <10 <sup>6</sup>       | 24 (61.5)              | <10 <sup>6</sup>       | <10 <sup>6</sup>      | 32 (82.1)                            | <10 <sup>6</sup>       | <10 <sup>6</sup>              | <10 <sup>6</sup>       |
| 2019/20                | Prison 1  | 37                        | 31 (83.8)            | <10 <sup>6</sup>       | 17 (45.9)              | <10 <sup>6</sup>       | <10 <sup>6</sup>      | <10 <sup>6</sup>                     | <10 <sup>6</sup>       | <10 <sup>6</sup>              | <10 <sup>6</sup>       |
|                        | Prison 2  | 77                        | 72 (93.5)            | <10 <sup>6</sup>       | 30 (39.0)              | <10 <sup>6</sup>       | <10 <sup>6</sup>      | 23 (29.9)                            | <10 <sup>6</sup>       | <10 <sup>6</sup>              | <10 <sup>6</sup>       |
|                        | Prison 3  | 88                        | 62 (70.5)            | <10 <sup>6</sup>       | 27 (30.7)              | <10 <sup>6</sup>       | <10 <sup>6</sup>      | 22 (25.0)                            | <10 <sup>6</sup>       | <10 <sup>6</sup>              | <10 <sup>6</sup>       |
|                        | Prison 4  | <10 <sup>6</sup>          | <10 <sup>6</sup>     | <10 <sup>6</sup>       | <10 <sup>6</sup>       | <10 <sup>6</sup>       | <10 <sup>6</sup>      | <10 <sup>6</sup>                     | <10 <sup>6</sup>       | <10 <sup>6</sup>              | <10 <sup>6</sup>       |
|                        | Prison 5  | 25                        | 23 (92.0)            | <10 <sup>6</sup>       | <10 <sup>6</sup>       | <10 <sup>6</sup>       | <10 <sup>6</sup>      | <10 <sup>6</sup>                     | <10 <sup>6</sup>       | <10 <sup>6</sup>              | <10 <sup>6</sup>       |
|                        | Prison 6  | 51                        | 46 (90.2)            | <10 <sup>6</sup>       | 30 (58.8)              | <10 <sup>6</sup>       | <10 <sup>6</sup>      | 20 (39.2)                            | <10 <sup>6</sup>       | <10 <sup>6</sup>              | <10 <sup>6</sup>       |
|                        | Prison 7  | 29                        | 24 (82.8)            | <10 <sup>6</sup>       | 10 (34.5)              | <10 <sup>6</sup>       | <10 <sup>6</sup>      | <10 <sup>6</sup>                     | <10 <sup>6</sup>       | <10 <sup>6</sup>              | <10 <sup>6</sup>       |
|                        | Prison 8  | 44                        | 40 (90.9)            | <10 <sup>6</sup>       | 12 (27.3)              | <10 <sup>6</sup>       | <10 <sup>6</sup>      | <10 <sup>6</sup>                     | <10 <sup>6</sup>       | <10 <sup>6</sup>              | <10 <sup>6</sup>       |
|                        | Prison 9  | 128                       | 118 (92.2)           | <10 <sup>6</sup>       | 85 (66.4)              | <10 <sup>6</sup>       | <10 <sup>6</sup>      | 37 (28.9)                            | <10 <sup>6</sup>       | <10 <sup>6</sup>              | <10 <sup>6</sup>       |
|                        | Prison 10 | 97                        | 80 (82.5)            | <10 <sup>6</sup>       | 24 (24.7)              | <10 <sup>6</sup>       | <10 <sup>6</sup>      | <10 <sup>6</sup>                     | <10 <sup>6</sup>       | <10 <sup>6</sup>              | <10 <sup>6</sup>       |
|                        | Prison 11 | 138                       | 92 (66.7)            | <10 <sup>6</sup>       | <10 <sup>6</sup>       | <10 <sup>6</sup>       | <10 <sup>6</sup>      | 10 (7.2)                             | <10 <sup>6</sup>       | <10 <sup>6</sup>              | <10 <sup>6</sup>       |
|                        | Prison 12 | <10 <sup>6</sup>          | <10 <sup>6</sup>     | <10 <sup>6</sup>       | <10 <sup>6</sup>       | <10 <sup>6</sup>       | <10 <sup>6</sup>      | <10 <sup>6</sup>                     | <10 <sup>6</sup>       | <10 <sup>6</sup>              | <10 <sup>6</sup>       |
|                        | Prison 13 | 46                        | 34 (73.9)            | <10 <sup>6</sup>       | 30 (65.2)              | <10 <sup>6</sup>       | <10 <sup>6</sup>      | 30 (65.2)                            | <10 <sup>6</sup>       | <10 <sup>6</sup>              | <10 <sup>6</sup>       |
| <b>Prison category</b> |           |                           |                      |                        |                        |                        |                       |                                      |                        |                               |                        |
| 2017/18                | A         | 128                       | 112 (87.5)           | <10 <sup>6</sup>       | 74 (57.8)              | <10 <sup>6</sup>       | <10 <sup>6</sup>      | 58 (45.3)                            | <10 <sup>6</sup>       | <10 <sup>6</sup>              | <10 <sup>6</sup>       |
|                        | B         | 254                       | 190 (74.8)           | <10 <sup>6</sup>       | 52 (20.5)              | <10 <sup>6</sup>       | <10 <sup>6</sup>      | 29 (11.4)                            | <10 <sup>6</sup>       | <10 <sup>6</sup>              | <10 <sup>6</sup>       |
|                        | C         | 163                       | 126 (77.3)           | <10 <sup>6</sup>       | 51 (31.3)              | 10 (6.1)               | <10 <sup>6</sup>      | 39 (23.9)                            | <10 <sup>6</sup>       | <10 <sup>6</sup>              | <10 <sup>6</sup>       |
|                        | Closed    | 50                        | 42 (84.0)            | <10 <sup>6</sup>       | 19 (38.0)              | <10 <sup>6</sup>       | <10 <sup>6</sup>      | <10 <sup>6</sup>                     | <10 <sup>6</sup>       | <10 <sup>6</sup>              | <10 <sup>6</sup>       |
|                        | D         | 76                        | 61 (80.3)            | <10 <sup>6</sup>       | 37 (48.7)              | <10 <sup>6</sup>       | <10 <sup>6</sup>      | 26 (34.2)                            | <10 <sup>6</sup>       | <10 <sup>6</sup>              | <10 <sup>6</sup>       |
|                        | YOI       | <10 <sup>6</sup>          | <10 <sup>6</sup>     | <10 <sup>6</sup>       | <10 <sup>6</sup>       | <10 <sup>6</sup>       | <10 <sup>6</sup>      | <10 <sup>6</sup>                     | <10 <sup>6</sup>       | <10 <sup>6</sup>              | <10 <sup>6</sup>       |
| 2018/19                | A         | 144                       | 138 (95.8)           | <10 <sup>6</sup>       | 92 (63.9)              | <10 <sup>6</sup>       | <10 <sup>6</sup>      | 72 (50.0)                            | <10 <sup>6</sup>       | <10 <sup>6</sup>              | <10 <sup>6</sup>       |
|                        | B         | 263                       | 224 (85.2)           | <10 <sup>6</sup>       | 43 (16.3)              | 10 (3.8)               | <10 <sup>6</sup>      | 17 (6.5)                             | 11 (4.2)               | <10 <sup>6</sup>              | <10 <sup>6</sup>       |
|                        | C         | 180                       | 130 (72.2)           | <10 <sup>6</sup>       | 62 (34.4)              | <10 <sup>6</sup>       | <10 <sup>6</sup>      | 61 (33.9)                            | <10 <sup>6</sup>       | <10 <sup>6</sup>              | <10 <sup>6</sup>       |
|                        | Closed    | 53                        | 42 (79.2)            | <10 <sup>6</sup>       | 15 (28.3)              | <10 <sup>6</sup>       | <10 <sup>6</sup>      | <10 <sup>6</sup>                     | <10 <sup>6</sup>       | <10 <sup>6</sup>              | <10 <sup>6</sup>       |
|                        | D         | 70                        | 58 (82.9)            | <10 <sup>6</sup>       | 35 (50.0)              | <10 <sup>6</sup>       | <10 <sup>6</sup>      | 24 (34.3)                            | <10 <sup>6</sup>       | <10 <sup>6</sup>              | <10 <sup>6</sup>       |
|                        | YOI       | <10 <sup>6</sup>          | <10 <sup>6</sup>     | <10 <sup>6</sup>       | <10 <sup>6</sup>       | <10 <sup>6</sup>       | <10 <sup>6</sup>      | <10 <sup>6</sup>                     | <10 <sup>6</sup>       | <10 <sup>6</sup>              | <10 <sup>6</sup>       |
| 2019/20                | A         | 174                       | 152 (87.4)           | <10 <sup>6</sup>       | 115 (66.1)             | <10 <sup>6</sup>       | <10 <sup>6</sup>      | 67 (38.5)                            | <10 <sup>6</sup>       | <10 <sup>6</sup>              | <10 <sup>6</sup>       |
|                        | B         | 312                       | 244 (78.2)           | <10 <sup>6</sup>       | 57 (18.3)              | 10 (3.2)               | <10 <sup>6</sup>      | 40 (12.8)                            | <10 <sup>6</sup>       | <10 <sup>6</sup>              | <10 <sup>6</sup>       |
|                        | C         | 131                       | 98 (74.8)            | <10 <sup>6</sup>       | 46 (35.1)              | <10 <sup>6</sup>       | <10 <sup>6</sup>      | 33 (25.2)                            | <10 <sup>6</sup>       | <10 <sup>6</sup>              | <10 <sup>6</sup>       |
|                        | Closed    | 73                        | 64 (87.7)            | <10 <sup>6</sup>       | 22 (30.1)              | <10 <sup>6</sup>       | <10 <sup>6</sup>      | <10 <sup>6</sup>                     | <10 <sup>6</sup>       | <10 <sup>6</sup>              | <10 <sup>6</sup>       |
|                        | D         | 76                        | 69 (90.8)            | <10 <sup>6</sup>       | 37 (48.7)              | 11 (14.5)              | <10 <sup>6</sup>      | 28 (36.8)                            | <10 <sup>6</sup>       | <10 <sup>6</sup>              | <10 <sup>6</sup>       |
|                        | YOI       | <10 <sup>6</sup>          | <10 <sup>6</sup>     | <10 <sup>6</sup>       | <10 <sup>6</sup>       | <10 <sup>6</sup>       | <10 <sup>6</sup>      | <10 <sup>6</sup>                     | <10 <sup>6</sup>       | <10 <sup>6</sup>              | <10 <sup>6</sup>       |

<sup>1</sup>Eligible for indicator; <sup>2</sup>Achieve in current prison; <sup>3</sup>Achieve in previous prison; <sup>4</sup>Overall achievement - either current or previous prison; <sup>5</sup>Declined indicator; <sup>6</sup>Suppressed (<10) to avoid disclosure

| <p>The proportion of people with diabetes who have had the following in the preceding 12 months: body mass index, blood pressure, record of smoking status, foot examination, urine albumin: creatinine ratio blood tests for HbA1c, cholesterol and serum creatinine</p> <p>Group: Diabetes, Asthma &amp; Epilepsy Care</p>             |                                |                  |                                    |                      |                        |                      |                        |                       |                      |                        |                      |                        |
|------------------------------------------------------------------------------------------------------------------------------------------------------------------------------------------------------------------------------------------------------------------------------------------------------------------------------------------|--------------------------------|------------------|------------------------------------|----------------------|------------------------|----------------------|------------------------|-----------------------|----------------------|------------------------|----------------------|------------------------|
| Indicator                                                                                                                                                                                                                                                                                                                                | Variable                       | Population       | Eligible <sup>1</sup><br>(% popln) | BMI (% eligible)     |                        | BP (% eligible)      |                        | Declined <sup>5</sup> | Hb1Ac (% eligible)   |                        | Chol (% eligible)    |                        |
|                                                                                                                                                                                                                                                                                                                                          |                                |                  |                                    | Satisfy <sup>2</sup> | Elsewhere <sup>3</sup> | Satisfy <sup>2</sup> | Elsewhere <sup>3</sup> |                       | Satisfy <sup>2</sup> | Elsewhere <sup>3</sup> | Satisfy <sup>2</sup> | Elsewhere <sup>3</sup> |
| <p>68.01% of those without moderate or severe frailty have BP of 140/80 or less, 56.66% of those without moderate or severe frailty have HbA1c of 58 or less, 83.34% of those with moderate or severe frailty have HbA1c of 75 or less, 78.04% had foot examination with risk classification. No comparisons for other examinations.</p> |                                |                  |                                    |                      |                        |                      |                        |                       |                      |                        |                      |                        |
| <b>Gender</b>                                                                                                                                                                                                                                                                                                                            |                                |                  |                                    |                      |                        |                      |                        |                       |                      |                        |                      |                        |
| 2017/18                                                                                                                                                                                                                                                                                                                                  | F                              | 1,699            | 50 (2.9)                           | 38 (76.0)            | <10 <sup>6</sup>       | 43 (86.0)            | <10 <sup>6</sup>       | <10 <sup>6</sup>      | 23 (46.0)            | <10 <sup>6</sup>       | 21 (42.0)            | <10 <sup>6</sup>       |
|                                                                                                                                                                                                                                                                                                                                          | M                              | 19,977           | 625 (3.1)                          | 452 (72.3)           | <10 <sup>6</sup>       | 505 (80.8)           | 25 (4.0)               | <10 <sup>6</sup>      | 365 (58.4)           | 40 (6.4)               | 292 (46.7)           | 34 (5.4)               |
| 2018/19                                                                                                                                                                                                                                                                                                                                  | F                              | 1,802            | 52 (2.9)                           | 40 (76.9)            | <10 <sup>6</sup>       | 50 (96.2)            | <10 <sup>6</sup>       | <10 <sup>6</sup>      | 31 (59.6)            | <10 <sup>6</sup>       | 16 (30.8)            | <10 <sup>6</sup>       |
|                                                                                                                                                                                                                                                                                                                                          | M                              | 20,295           | 661 (3.3)                          | 549 (83.1)           | <10 <sup>6</sup>       | 574 (86.8)           | 12 (1.8)               | <10 <sup>6</sup>      | 398 (60.2)           | 29 (4.4)               | 347 (52.5)           | 26 (3.9)               |
| 2019/20                                                                                                                                                                                                                                                                                                                                  | F                              | 1,376            | 44 (3.2)                           | 35 (79.5)            | <10 <sup>6</sup>       | 41 (93.2)            | <10 <sup>6</sup>       | <10 <sup>6</sup>      | 21 (47.7)            | <10 <sup>6</sup>       | 12 (27.3)            | <10 <sup>6</sup>       |
|                                                                                                                                                                                                                                                                                                                                          | M                              | 23,570           | 697 (3.0)                          | 598 (85.8)           | <10 <sup>6</sup>       | 651 (93.4)           | <10 <sup>6</sup>       | <10 <sup>6</sup>      | 430 (61.7)           | 30 (4.3)               | 377 (54.1)           | 20 (2.9)               |
| <b>Sentence Status</b>                                                                                                                                                                                                                                                                                                                   |                                |                  |                                    |                      |                        |                      |                        |                       |                      |                        |                      |                        |
| 2017/18                                                                                                                                                                                                                                                                                                                                  | .                              | 81               | <10 <sup>6</sup>                   | <10 <sup>6</sup>     | <10 <sup>6</sup>       | <10 <sup>6</sup>     | <10 <sup>6</sup>       | <10 <sup>6</sup>      | <10 <sup>6</sup>     | <10 <sup>6</sup>       | <10 <sup>6</sup>     | <10 <sup>6</sup>       |
|                                                                                                                                                                                                                                                                                                                                          | Absconded                      | <10 <sup>6</sup> | <10 <sup>6</sup>                   | <10 <sup>6</sup>     | <10 <sup>6</sup>       | <10 <sup>6</sup>     | <10 <sup>6</sup>       | <10 <sup>6</sup>      | <10 <sup>6</sup>     | <10 <sup>6</sup>       | <10 <sup>6</sup>     | <10 <sup>6</sup>       |
|                                                                                                                                                                                                                                                                                                                                          | Active In                      | 15,872           | 495 (3.1)                          | 371 (74.9)           | <10 <sup>6</sup>       | 402 (81.2)           | 24 (4.8)               | <10 <sup>6</sup>      | 292 (59.0)           | 42 (8.5)               | 238 (48.1)           | 35 (7.1)               |
|                                                                                                                                                                                                                                                                                                                                          | Active Out                     | 1,052            | 33 (3.1)                           | 16 (48.5)            | <10 <sup>6</sup>       | 24 (72.7)            | <10 <sup>6</sup>       | <10 <sup>6</sup>      | 17 (51.5)            | <10 <sup>6</sup>       | 15 (45.5)            | <10 <sup>6</sup>       |
|                                                                                                                                                                                                                                                                                                                                          | Convicted Sentence             | 2,125            | 68 (3.2)                           | 47 (69.1)            | <10 <sup>6</sup>       | 56 (82.4)            | <10 <sup>6</sup>       | <10 <sup>6</sup>      | 38 (55.9)            | <10 <sup>6</sup>       | 28 (41.2)            | <10 <sup>6</sup>       |
|                                                                                                                                                                                                                                                                                                                                          | Downgrade in security category | <10 <sup>6</sup> | <10 <sup>6</sup>                   | <10 <sup>6</sup>     | <10 <sup>6</sup>       | <10 <sup>6</sup>     | <10 <sup>6</sup>       | <10 <sup>6</sup>      | <10 <sup>6</sup>     | <10 <sup>6</sup>       | <10 <sup>6</sup>     | <10 <sup>6</sup>       |
|                                                                                                                                                                                                                                                                                                                                          | Internal Cell Move             | <10 <sup>6</sup> | <10 <sup>6</sup>                   | <10 <sup>6</sup>     | <10 <sup>6</sup>       | <10 <sup>6</sup>     | <10 <sup>6</sup>       | <10 <sup>6</sup>      | <10 <sup>6</sup>     | <10 <sup>6</sup>       | <10 <sup>6</sup>     | <10 <sup>6</sup>       |
|                                                                                                                                                                                                                                                                                                                                          | Judges Remand                  | 92               | <10 <sup>6</sup>                   | <10 <sup>6</sup>     | <10 <sup>6</sup>       | <10 <sup>6</sup>     | <10 <sup>6</sup>       | <10 <sup>6</sup>      | <10 <sup>6</sup>     | <10 <sup>6</sup>       | <10 <sup>6</sup>     | <10 <sup>6</sup>       |
|                                                                                                                                                                                                                                                                                                                                          | Licence Revoke                 | 52               | <10 <sup>6</sup>                   | <10 <sup>6</sup>     | <10 <sup>6</sup>       | <10 <sup>6</sup>     | <10 <sup>6</sup>       | <10 <sup>6</sup>      | <10 <sup>6</sup>     | <10 <sup>6</sup>       | <10 <sup>6</sup>     | <10 <sup>6</sup>       |
|                                                                                                                                                                                                                                                                                                                                          | On Remand                      | 1,492            | 38 (2.5)                           | 25 (65.8)            | <10 <sup>6</sup>       | 29 (76.3)            | <10 <sup>6</sup>       | <10 <sup>6</sup>      | 20 (52.6)            | <10 <sup>6</sup>       | 16 (42.1)            | <10 <sup>6</sup>       |
|                                                                                                                                                                                                                                                                                                                                          | Transfer                       | 910              | 31 (3.4)                           | 25 (80.6)            | <10 <sup>6</sup>       | 30 (96.8)            | <10 <sup>6</sup>       | <10 <sup>6</sup>      | 20 (64.5)            | <10 <sup>6</sup>       | 15 (48.4)            | <10 <sup>6</sup>       |
|                                                                                                                                                                                                                                                                                                                                          | Upgrade in security category   | <10 <sup>6</sup> | <10 <sup>6</sup>                   | <10 <sup>6</sup>     | <10 <sup>6</sup>       | <10 <sup>6</sup>     | <10 <sup>6</sup>       | <10 <sup>6</sup>      | <10 <sup>6</sup>     | <10 <sup>6</sup>       | <10 <sup>6</sup>     | <10 <sup>6</sup>       |
| 2018/19                                                                                                                                                                                                                                                                                                                                  | .                              | 88               | <10 <sup>6</sup>                   | <10 <sup>6</sup>     | <10 <sup>6</sup>       | <10 <sup>6</sup>     | <10 <sup>6</sup>       | <10 <sup>6</sup>      | <10 <sup>6</sup>     | <10 <sup>6</sup>       | <10 <sup>6</sup>     | <10 <sup>6</sup>       |
|                                                                                                                                                                                                                                                                                                                                          | Absconded                      | <10 <sup>6</sup> | <10 <sup>6</sup>                   | <10 <sup>6</sup>     | <10 <sup>6</sup>       | <10 <sup>6</sup>     | <10 <sup>6</sup>       | <10 <sup>6</sup>      | <10 <sup>6</sup>     | <10 <sup>6</sup>       | <10 <sup>6</sup>     | <10 <sup>6</sup>       |
|                                                                                                                                                                                                                                                                                                                                          | Active In                      | 18,145           | 589 (3.2)                          | 492 (83.5)           | <10 <sup>6</sup>       | 516 (87.6)           | <10 <sup>6</sup>       | <10 <sup>6</sup>      | 366 (62.1)           | 29 (4.9)               | 318 (54.0)           | 26 (4.4)               |
|                                                                                                                                                                                                                                                                                                                                          | Active Out                     | 835              | 34 (4.1)                           | 26 (76.5)            | <10 <sup>6</sup>       | 30 (88.2)            | <10 <sup>6</sup>       | <10 <sup>6</sup>      | 17 (50.0)            | <10 <sup>6</sup>       | 13 (38.2)            | <10 <sup>6</sup>       |
|                                                                                                                                                                                                                                                                                                                                          | Convicted Sentence             | 1,320            | 38 (2.9)                           | 29 (76.3)            | <10 <sup>6</sup>       | 31 (81.6)            | <10 <sup>6</sup>       | <10 <sup>6</sup>      | 20 (52.6)            | <10 <sup>6</sup>       | 14 (36.8)            | <10 <sup>6</sup>       |
|                                                                                                                                                                                                                                                                                                                                          | Downgrade in security category | <10 <sup>6</sup> | <10 <sup>6</sup>                   | <10 <sup>6</sup>     | <10 <sup>6</sup>       | <10 <sup>6</sup>     | <10 <sup>6</sup>       | <10 <sup>6</sup>      | <10 <sup>6</sup>     | <10 <sup>6</sup>       | <10 <sup>6</sup>     | <10 <sup>6</sup>       |
|                                                                                                                                                                                                                                                                                                                                          | Internal Cell Move             | <10 <sup>6</sup> | <10 <sup>6</sup>                   | <10 <sup>6</sup>     | <10 <sup>6</sup>       | <10 <sup>6</sup>     | <10 <sup>6</sup>       | <10 <sup>6</sup>      | <10 <sup>6</sup>     | <10 <sup>6</sup>       | <10 <sup>6</sup>     | <10 <sup>6</sup>       |
|                                                                                                                                                                                                                                                                                                                                          | Judges Remand                  | <10 <sup>6</sup> | <10 <sup>6</sup>                   | <10 <sup>6</sup>     | <10 <sup>6</sup>       | <10 <sup>6</sup>     | <10 <sup>6</sup>       | <10 <sup>6</sup>      | <10 <sup>6</sup>     | <10 <sup>6</sup>       | <10 <sup>6</sup>     | <10 <sup>6</sup>       |
|                                                                                                                                                                                                                                                                                                                                          | Licence Revoke                 | 125              | <10 <sup>6</sup>                   | <10 <sup>6</sup>     | <10 <sup>6</sup>       | <10 <sup>6</sup>     | <10 <sup>6</sup>       | <10 <sup>6</sup>      | <10 <sup>6</sup>     | <10 <sup>6</sup>       | <10 <sup>6</sup>     | <10 <sup>6</sup>       |
|                                                                                                                                                                                                                                                                                                                                          | On Remand                      | 1,059            | 27 (2.5)                           | 23 (85.2)            | <10 <sup>6</sup>       | 26 (96.3)            | <10 <sup>6</sup>       | <10 <sup>6</sup>      | 14 (51.9)            | <10 <sup>6</sup>       | <10 <sup>6</sup>     | <10 <sup>6</sup>       |
|                                                                                                                                                                                                                                                                                                                                          | Transfer                       | 518              | 19 (3.7)                           | 17 (89.5)            | <10 <sup>6</sup>       | 19 (100.0)           | <10 <sup>6</sup>       | <10 <sup>6</sup>      | 11 (57.9)            | <10 <sup>6</sup>       | <10 <sup>6</sup>     | <10 <sup>6</sup>       |
|                                                                                                                                                                                                                                                                                                                                          | Upgrade in security category   | <10 <sup>6</sup> | <10 <sup>6</sup>                   | <10 <sup>6</sup>     | <10 <sup>6</sup>       | <10 <sup>6</sup>     | <10 <sup>6</sup>       | <10 <sup>6</sup>      | <10 <sup>6</sup>     | <10 <sup>6</sup>       | <10 <sup>6</sup>     | <10 <sup>6</sup>       |
| 2019/20                                                                                                                                                                                                                                                                                                                                  | .                              | 69               | <10 <sup>6</sup>                   | <10 <sup>6</sup>     | <10 <sup>6</sup>       | <10 <sup>6</sup>     | <10 <sup>6</sup>       | <10 <sup>6</sup>      | <10 <sup>6</sup>     | <10 <sup>6</sup>       | <10 <sup>6</sup>     | <10 <sup>6</sup>       |
|                                                                                                                                                                                                                                                                                                                                          | Absconded                      | <10 <sup>6</sup> | <10 <sup>6</sup>                   | <10 <sup>6</sup>     | <10 <sup>6</sup>       | <10 <sup>6</sup>     | <10 <sup>6</sup>       | <10 <sup>6</sup>      | <10 <sup>6</sup>     | <10 <sup>6</sup>       | <10 <sup>6</sup>     | <10 <sup>6</sup>       |
|                                                                                                                                                                                                                                                                                                                                          | Active In                      | 22,424           | 674 (3.0)                          | 578 (85.8)           | <10 <sup>6</sup>       | 629 (93.3)           | <10 <sup>6</sup>       | <10 <sup>6</sup>      | 418 (62.0)           | 30 (4.5)               | 364 (54.0)           | 21 (3.1)               |
|                                                                                                                                                                                                                                                                                                                                          | Active Out                     | 625              | 26 (4.2)                           | 18 (69.2)            | <10 <sup>6</sup>       | 25 (96.2)            | <10 <sup>6</sup>       | <10 <sup>6</sup>      | <10 <sup>6</sup>     | <10 <sup>6</sup>       | <10 <sup>6</sup>     | <10 <sup>6</sup>       |
|                                                                                                                                                                                                                                                                                                                                          | Convicted Sentence             | 1,361            | 36 (2.6)                           | 35 (97.2)            | <10 <sup>6</sup>       | 35 (97.2)            | <10 <sup>6</sup>       | <10 <sup>6</sup>      | 25 (69.4)            | <10 <sup>6</sup>       | 21 (58.3)            | <10 <sup>6</sup>       |
|                                                                                                                                                                                                                                                                                                                                          | Downgrade in security category | <10 <sup>6</sup> | <10 <sup>6</sup>                   | <10 <sup>6</sup>     | <10 <sup>6</sup>       | <10 <sup>6</sup>     | <10 <sup>6</sup>       | <10 <sup>6</sup>      | <10 <sup>6</sup>     | <10 <sup>6</sup>       | <10 <sup>6</sup>     | <10 <sup>6</sup>       |
|                                                                                                                                                                                                                                                                                                                                          | Internal Cell Move             | <10 <sup>6</sup> | <10 <sup>6</sup>                   | <10 <sup>6</sup>     | <10 <sup>6</sup>       | <10 <sup>6</sup>     | <10 <sup>6</sup>       | <10 <sup>6</sup>      | <10 <sup>6</sup>     | <10 <sup>6</sup>       | <10 <sup>6</sup>     | <10 <sup>6</sup>       |
|                                                                                                                                                                                                                                                                                                                                          | Judges Remand                  | 19               | <10 <sup>6</sup>                   | <10 <sup>6</sup>     | <10 <sup>6</sup>       | <10 <sup>6</sup>     | <10 <sup>6</sup>       | <10 <sup>6</sup>      | <10 <sup>6</sup>     | <10 <sup>6</sup>       | <10 <sup>6</sup>     | <10 <sup>6</sup>       |
|                                                                                                                                                                                                                                                                                                                                          | Licence Revoke                 | 178              | <10 <sup>6</sup>                   | <10 <sup>6</sup>     | <10 <sup>6</sup>       | <10 <sup>6</sup>     | <10 <sup>6</sup>       | <10 <sup>6</sup>      | <10 <sup>6</sup>     | <10 <sup>6</sup>       | <10 <sup>6</sup>     | <10 <sup>6</sup>       |
|                                                                                                                                                                                                                                                                                                                                          | On Remand                      | 1,031            | 23 (2.2)                           | 20 (87.0)            | <10 <sup>6</sup>       | 21 (91.3)            | <10 <sup>6</sup>       | <10 <sup>6</sup>      | 15 (65.2)            | <10 <sup>6</sup>       | 14 (60.9)            | <10 <sup>6</sup>       |
|                                                                                                                                                                                                                                                                                                                                          | Transfer                       | 101              | <10 <sup>6</sup>                   | <10 <sup>6</sup>     | <10 <sup>6</sup>       | <10 <sup>6</sup>     | <10 <sup>6</sup>       | <10 <sup>6</sup>      | <10 <sup>6</sup>     | <10 <sup>6</sup>       | <10 <sup>6</sup>     | <10 <sup>6</sup>       |
|                                                                                                                                                                                                                                                                                                                                          | Upgrade in security category   | <10 <sup>6</sup> | <10 <sup>6</sup>                   | <10 <sup>6</sup>     | <10 <sup>6</sup>       | <10 <sup>6</sup>     | <10 <sup>6</sup>       | <10 <sup>6</sup>      | <10 <sup>6</sup>     | <10 <sup>6</sup>       | <10 <sup>6</sup>     | <10 <sup>6</sup>       |
| <b>Age - years</b>                                                                                                                                                                                                                                                                                                                       |                                |                  |                                    |                      |                        |                      |                        |                       |                      |                        |                      |                        |
| 2017/18                                                                                                                                                                                                                                                                                                                                  | 10 - <20                       | 468              | <10 <sup>6</sup>                   | <10 <sup>6</sup>     | <10 <sup>6</sup>       | <10 <sup>6</sup>     | <10 <sup>6</sup>       | <10 <sup>6</sup>      | <10 <sup>6</sup>     | <10 <sup>6</sup>       | <10 <sup>6</sup>     | <10 <sup>6</sup>       |
|                                                                                                                                                                                                                                                                                                                                          | 20 - <30                       | 6,994            | 38 (0.5)                           | 26 (68.4)            | <10 <sup>6</sup>       | 33 (86.8)            | <10 <sup>6</sup>       | <10 <sup>6</sup>      | 18 (47.4)            | <10 <sup>6</sup>       | <10 <sup>6</sup>     | <10 <sup>6</sup>       |
|                                                                                                                                                                                                                                                                                                                                          | 30 - <40                       | 7,051            | 77 (1.1)                           | 54 (70.1)            | <10 <sup>6</sup>       | 60 (77.9)            | <10 <sup>6</sup>       | <10 <sup>6</sup>      | 32 (41.6)            | <10 <sup>6</sup>       | 29 (37.7)            | <10 <sup>6</sup>       |
|                                                                                                                                                                                                                                                                                                                                          | 40 - <50                       | 4,114            | 150 (3.6)                          | 107 (71.3)           | <10 <sup>6</sup>       | 115 (76.7)           | <10 <sup>6</sup>       | <10 <sup>6</sup>      | 78 (52.0)            | <10 <sup>6</sup>       | 67 (44.7)            | <10 <sup>6</sup>       |
|                                                                                                                                                                                                                                                                                                                                          | 50 - <60                       | 2,107            | 218 (10.3)                         | 165 (75.7)           | <10 <sup>6</sup>       | 186 (85.3)           | <10 <sup>6</sup>       | <10 <sup>6</sup>      | 134 (61.5)           | 18 (8.3)               | 110 (50.5)           | 16 (7.3)               |
|                                                                                                                                                                                                                                                                                                                                          | 60 - <70                       | 684              | 124 (18.1)                         | 91 (73.4)            | <10 <sup>6</sup>       | 99 (79.8)            | <10 <sup>6</sup>       | <10 <sup>6</sup>      | 78 (62.9)            | <10 <sup>6</sup>       | 61 (49.2)            | <10 <sup>6</sup>       |
|                                                                                                                                                                                                                                                                                                                                          | 70 - <80                       | 213              | 52 (24.4)                          | 35 (67.3)            | <10 <sup>6</sup>       | 43 (82.7)            | <10 <sup>6</sup>       | <10 <sup>6</sup>      | 36 (69.2)            | <10 <sup>6</sup>       | 29 (55.8)            | <10 <sup>6</sup>       |
|                                                                                                                                                                                                                                                                                                                                          | 80 - <90                       | 40               | 13 (32.5)                          | 10 (76.9)            | <10 <sup>6</sup>       | 10 (76.9)            | <10 <sup>6</sup>       | <10 <sup>6</sup>      | 10 (76.9)            | <10 <sup>6</sup>       | <10 <sup>6</sup>     | <10 <sup>6</sup>       |
|                                                                                                                                                                                                                                                                                                                                          | 90 - <100                      | <10 <sup>6</sup> | <10 <sup>6</sup>                   | <10 <sup>6</sup>     | <10 <sup>6</sup>       | <10 <sup>6</sup>     | <10 <sup>6</sup>       | <10 <sup>6</sup>      | <10 <sup>6</sup>     | <10 <sup>6</sup>       | <10 <sup>6</sup>     | <10 <sup>6</sup>       |
|                                                                                                                                                                                                                                                                                                                                          | 100 - <110                     | <10 <sup>6</sup> | <10 <sup>6</sup>                   | <10 <sup>6</sup>     | <10 <sup>6</sup>       | <10 <sup>6</sup>     | <10 <sup>6</sup>       | <10 <sup>6</sup>      | <10 <sup>6</sup>     | <10 <sup>6</sup>       | <10 <sup>6</sup>     | <10 <sup>6</sup>       |

<sup>1</sup>Eligible for indicator; <sup>2</sup>Achieve in current prison; <sup>3</sup>Achieve in previous prison; <sup>4</sup>Overall achievement - either current or previous prison; <sup>5</sup>Declined indicator; <sup>6</sup>Suppressed (<10) to avoid disclosure

| <p>The proportion of people with diabetes who have had the following in the preceding 12 months: body mass index, blood pressure, record of smoking status, foot examination, urine albumin: creatinine ratio blood tests for HbA1c, cholesterol and serum creatinine</p> <p>Group: Diabetes, Asthma &amp; Epilepsy Care</p> |                                |                       |                           |                        |                        |                        |                       |                                       |                        | <p>68.01% of those without moderate or severe frailty have BP of 140/80 or less, 56.66% of those without moderate or severe frailty have HbA1c of 58 or less, 83.34% of those with moderate or severe frailty have HbA1c of 75 or less, 78.04% had foot examination with risk classification. No comparisons for other examinations.</p> |                        |
|------------------------------------------------------------------------------------------------------------------------------------------------------------------------------------------------------------------------------------------------------------------------------------------------------------------------------|--------------------------------|-----------------------|---------------------------|------------------------|------------------------|------------------------|-----------------------|---------------------------------------|------------------------|------------------------------------------------------------------------------------------------------------------------------------------------------------------------------------------------------------------------------------------------------------------------------------------------------------------------------------------|------------------------|
| Indicator                                                                                                                                                                                                                                                                                                                    | Variable                       | Eligible <sup>1</sup> | Smoke Status (% eligible) |                        | Foot Exam (% eligible) |                        |                       | Albumin Creatinine Ratio (% eligible) |                        | Serum Creatinine (% eligible)                                                                                                                                                                                                                                                                                                            |                        |
|                                                                                                                                                                                                                                                                                                                              |                                |                       | Satisfy <sup>2</sup>      | Elsewhere <sup>3</sup> | Satisfy <sup>2</sup>   | Elsewhere <sup>3</sup> | Declined <sup>5</sup> | Satisfy <sup>2</sup>                  | Elsewhere <sup>3</sup> | Satisfy <sup>2</sup>                                                                                                                                                                                                                                                                                                                     | Elsewhere <sup>3</sup> |
| Gender                                                                                                                                                                                                                                                                                                                       |                                |                       |                           |                        |                        |                        |                       |                                       |                        |                                                                                                                                                                                                                                                                                                                                          |                        |
| 2017/18                                                                                                                                                                                                                                                                                                                      | F                              | 50                    | 42 (84.0)                 | <10 <sup>6</sup>       | 19 (38.0)              | <10 <sup>6</sup>       | <10 <sup>6</sup>      | <10 <sup>6</sup>                      | <10 <sup>6</sup>       | <10 <sup>6</sup>                                                                                                                                                                                                                                                                                                                         | <10 <sup>6</sup>       |
|                                                                                                                                                                                                                                                                                                                              | M                              | 625                   | 493 (78.9)                | <10 <sup>6</sup>       | 216 (34.6)             | 20 (3.2)               | <10 <sup>6</sup>      | 153 (24.5)                            | 18 (2.9)               | 12 (1.9)                                                                                                                                                                                                                                                                                                                                 | <10 <sup>6</sup>       |
| 2018/19                                                                                                                                                                                                                                                                                                                      | F                              | 52                    | 42 (80.8)                 | <10 <sup>6</sup>       | 15 (28.8)              | <10 <sup>6</sup>       | <10 <sup>6</sup>      | <10 <sup>6</sup>                      | <10 <sup>6</sup>       | <10 <sup>6</sup>                                                                                                                                                                                                                                                                                                                         | <10 <sup>6</sup>       |
|                                                                                                                                                                                                                                                                                                                              | M                              | 661                   | 553 (83.7)                | 16 (2.4)               | 235 (35.6)             | 24 (3.6)               | <10 <sup>6</sup>      | 175 (26.5)                            | 23 (3.5)               | <10 <sup>6</sup>                                                                                                                                                                                                                                                                                                                         | <10 <sup>6</sup>       |
| 2019/20                                                                                                                                                                                                                                                                                                                      | F                              | 44                    | 40 (90.9)                 | <10 <sup>6</sup>       | 12 (27.3)              | <10 <sup>6</sup>       | <10 <sup>6</sup>      | <10 <sup>6</sup>                      | <10 <sup>6</sup>       | <10 <sup>6</sup>                                                                                                                                                                                                                                                                                                                         | <10 <sup>6</sup>       |
|                                                                                                                                                                                                                                                                                                                              | M                              | 697                   | 565 (81.1)                | 13 (1.9)               | 256 (36.7)             | 33 (4.7)               | <10 <sup>6</sup>      | 170 (24.4)                            | 21 (3.0)               | <10 <sup>6</sup>                                                                                                                                                                                                                                                                                                                         | <10 <sup>6</sup>       |
| <b>Sentence Status</b>                                                                                                                                                                                                                                                                                                       |                                |                       |                           |                        |                        |                        |                       |                                       |                        |                                                                                                                                                                                                                                                                                                                                          |                        |
| 2017/18                                                                                                                                                                                                                                                                                                                      | .                              | <10 <sup>6</sup>      | <10 <sup>6</sup>          | <10 <sup>6</sup>       | <10 <sup>6</sup>       | <10 <sup>6</sup>       | <10 <sup>6</sup>      | <10 <sup>6</sup>                      | <10 <sup>6</sup>       | <10 <sup>6</sup>                                                                                                                                                                                                                                                                                                                         | <10 <sup>6</sup>       |
|                                                                                                                                                                                                                                                                                                                              | Absconded                      | <10 <sup>6</sup>      | <10 <sup>6</sup>          | <10 <sup>6</sup>       | <10 <sup>6</sup>       | <10 <sup>6</sup>       | <10 <sup>6</sup>      | <10 <sup>6</sup>                      | <10 <sup>6</sup>       | <10 <sup>6</sup>                                                                                                                                                                                                                                                                                                                         | <10 <sup>6</sup>       |
|                                                                                                                                                                                                                                                                                                                              | Active In                      | 495                   | 402 (81.2)                | <10 <sup>6</sup>       | 175 (35.4)             | 20 (4.0)               | <10 <sup>6</sup>      | 119 (24.0)                            | 17 (3.4)               | <10 <sup>6</sup>                                                                                                                                                                                                                                                                                                                         | <10 <sup>6</sup>       |
|                                                                                                                                                                                                                                                                                                                              | Active Out                     | 33                    | 23 (69.7)                 | <10 <sup>6</sup>       | 10 (30.3)              | <10 <sup>6</sup>       | <10 <sup>6</sup>      | <10 <sup>6</sup>                      | <10 <sup>6</sup>       | <10 <sup>6</sup>                                                                                                                                                                                                                                                                                                                         | <10 <sup>6</sup>       |
|                                                                                                                                                                                                                                                                                                                              | Convicted Sentence             | 68                    | 52 (76.5)                 | <10 <sup>6</sup>       | 21 (30.9)              | <10 <sup>6</sup>       | <10 <sup>6</sup>      | 11 (16.2)                             | <10 <sup>6</sup>       | <10 <sup>6</sup>                                                                                                                                                                                                                                                                                                                         | <10 <sup>6</sup>       |
|                                                                                                                                                                                                                                                                                                                              | Downgrade in security category | <10 <sup>6</sup>      | <10 <sup>6</sup>          | <10 <sup>6</sup>       | <10 <sup>6</sup>       | <10 <sup>6</sup>       | <10 <sup>6</sup>      | <10 <sup>6</sup>                      | <10 <sup>6</sup>       | <10 <sup>6</sup>                                                                                                                                                                                                                                                                                                                         | <10 <sup>6</sup>       |
|                                                                                                                                                                                                                                                                                                                              | Internal Cell Move             | <10 <sup>6</sup>      | <10 <sup>6</sup>          | <10 <sup>6</sup>       | <10 <sup>6</sup>       | <10 <sup>6</sup>       | <10 <sup>6</sup>      | <10 <sup>6</sup>                      | <10 <sup>6</sup>       | <10 <sup>6</sup>                                                                                                                                                                                                                                                                                                                         | <10 <sup>6</sup>       |
|                                                                                                                                                                                                                                                                                                                              | Judges Remand                  | <10 <sup>6</sup>      | <10 <sup>6</sup>          | <10 <sup>6</sup>       | <10 <sup>6</sup>       | <10 <sup>6</sup>       | <10 <sup>6</sup>      | <10 <sup>6</sup>                      | <10 <sup>6</sup>       | <10 <sup>6</sup>                                                                                                                                                                                                                                                                                                                         | <10 <sup>6</sup>       |
|                                                                                                                                                                                                                                                                                                                              | Licence Revoke                 | <10 <sup>6</sup>      | <10 <sup>6</sup>          | <10 <sup>6</sup>       | <10 <sup>6</sup>       | <10 <sup>6</sup>       | <10 <sup>6</sup>      | <10 <sup>6</sup>                      | <10 <sup>6</sup>       | <10 <sup>6</sup>                                                                                                                                                                                                                                                                                                                         | <10 <sup>6</sup>       |
|                                                                                                                                                                                                                                                                                                                              | On Remand                      | 38                    | 25 (65.8)                 | <10 <sup>6</sup>       | 14 (36.8)              | <10 <sup>6</sup>       | <10 <sup>6</sup>      | <10 <sup>6</sup>                      | <10 <sup>6</sup>       | <10 <sup>6</sup>                                                                                                                                                                                                                                                                                                                         | <10 <sup>6</sup>       |
|                                                                                                                                                                                                                                                                                                                              | Transfer                       | 31                    | 27 (87.1)                 | <10 <sup>6</sup>       | 15 (48.4)              | <10 <sup>6</sup>       | <10 <sup>6</sup>      | 11 (35.5)                             | <10 <sup>6</sup>       | <10 <sup>6</sup>                                                                                                                                                                                                                                                                                                                         | <10 <sup>6</sup>       |
|                                                                                                                                                                                                                                                                                                                              | Upgrade in security category   | <10 <sup>6</sup>      | <10 <sup>6</sup>          | <10 <sup>6</sup>       | <10 <sup>6</sup>       | <10 <sup>6</sup>       | <10 <sup>6</sup>      | <10 <sup>6</sup>                      | <10 <sup>6</sup>       | <10 <sup>6</sup>                                                                                                                                                                                                                                                                                                                         | <10 <sup>6</sup>       |
| 2018/19                                                                                                                                                                                                                                                                                                                      | .                              | <10 <sup>6</sup>      | <10 <sup>6</sup>          | <10 <sup>6</sup>       | <10 <sup>6</sup>       | <10 <sup>6</sup>       | <10 <sup>6</sup>      | <10 <sup>6</sup>                      | <10 <sup>6</sup>       | <10 <sup>6</sup>                                                                                                                                                                                                                                                                                                                         | <10 <sup>6</sup>       |
|                                                                                                                                                                                                                                                                                                                              | Absconded                      | <10 <sup>6</sup>      | <10 <sup>6</sup>          | <10 <sup>6</sup>       | <10 <sup>6</sup>       | <10 <sup>6</sup>       | <10 <sup>6</sup>      | <10 <sup>6</sup>                      | <10 <sup>6</sup>       | <10 <sup>6</sup>                                                                                                                                                                                                                                                                                                                         | <10 <sup>6</sup>       |
|                                                                                                                                                                                                                                                                                                                              | Active In                      | 589                   | 493 (83.7)                | 16 (2.7)               | 202 (34.3)             | 25 (4.2)               | <10 <sup>6</sup>      | 161 (27.3)                            | 22 (3.7)               | <10 <sup>6</sup>                                                                                                                                                                                                                                                                                                                         | <10 <sup>6</sup>       |
|                                                                                                                                                                                                                                                                                                                              | Active Out                     | 34                    | 31 (91.2)                 | <10 <sup>6</sup>       | 10 (29.4)              | <10 <sup>6</sup>       | <10 <sup>6</sup>      | <10 <sup>6</sup>                      | <10 <sup>6</sup>       | <10 <sup>6</sup>                                                                                                                                                                                                                                                                                                                         | <10 <sup>6</sup>       |
|                                                                                                                                                                                                                                                                                                                              | Convicted Sentence             | 38                    | 29 (76.3)                 | <10 <sup>6</sup>       | 13 (34.2)              | <10 <sup>6</sup>       | <10 <sup>6</sup>      | <10 <sup>6</sup>                      | <10 <sup>6</sup>       | <10 <sup>6</sup>                                                                                                                                                                                                                                                                                                                         | <10 <sup>6</sup>       |
|                                                                                                                                                                                                                                                                                                                              | Downgrade in security category | <10 <sup>6</sup>      | <10 <sup>6</sup>          | <10 <sup>6</sup>       | <10 <sup>6</sup>       | <10 <sup>6</sup>       | <10 <sup>6</sup>      | <10 <sup>6</sup>                      | <10 <sup>6</sup>       | <10 <sup>6</sup>                                                                                                                                                                                                                                                                                                                         | <10 <sup>6</sup>       |
|                                                                                                                                                                                                                                                                                                                              | Internal Cell Move             | <10 <sup>6</sup>      | <10 <sup>6</sup>          | <10 <sup>6</sup>       | <10 <sup>6</sup>       | <10 <sup>6</sup>       | <10 <sup>6</sup>      | <10 <sup>6</sup>                      | <10 <sup>6</sup>       | <10 <sup>6</sup>                                                                                                                                                                                                                                                                                                                         | <10 <sup>6</sup>       |
|                                                                                                                                                                                                                                                                                                                              | Judges Remand                  | <10 <sup>6</sup>      | <10 <sup>6</sup>          | <10 <sup>6</sup>       | <10 <sup>6</sup>       | <10 <sup>6</sup>       | <10 <sup>6</sup>      | <10 <sup>6</sup>                      | <10 <sup>6</sup>       | <10 <sup>6</sup>                                                                                                                                                                                                                                                                                                                         | <10 <sup>6</sup>       |
|                                                                                                                                                                                                                                                                                                                              | Licence Revoke                 | <10 <sup>6</sup>      | <10 <sup>6</sup>          | <10 <sup>6</sup>       | <10 <sup>6</sup>       | <10 <sup>6</sup>       | <10 <sup>6</sup>      | <10 <sup>6</sup>                      | <10 <sup>6</sup>       | <10 <sup>6</sup>                                                                                                                                                                                                                                                                                                                         | <10 <sup>6</sup>       |
|                                                                                                                                                                                                                                                                                                                              | On Remand                      | 27                    | 26 (96.3)                 | <10 <sup>6</sup>       | 13 (48.1)              | <10 <sup>6</sup>       | <10 <sup>6</sup>      | <10 <sup>6</sup>                      | <10 <sup>6</sup>       | <10 <sup>6</sup>                                                                                                                                                                                                                                                                                                                         | <10 <sup>6</sup>       |
|                                                                                                                                                                                                                                                                                                                              | Transfer                       | 19                    | 13 (68.4)                 | <10 <sup>6</sup>       | 11 (57.9)              | <10 <sup>6</sup>       | <10 <sup>6</sup>      | <10 <sup>6</sup>                      | <10 <sup>6</sup>       | <10 <sup>6</sup>                                                                                                                                                                                                                                                                                                                         | <10 <sup>6</sup>       |
|                                                                                                                                                                                                                                                                                                                              | Upgrade in security category   | <10 <sup>6</sup>      | <10 <sup>6</sup>          | <10 <sup>6</sup>       | <10 <sup>6</sup>       | <10 <sup>6</sup>       | <10 <sup>6</sup>      | <10 <sup>6</sup>                      | <10 <sup>6</sup>       | <10 <sup>6</sup>                                                                                                                                                                                                                                                                                                                         | <10 <sup>6</sup>       |
| 2019/20                                                                                                                                                                                                                                                                                                                      | .                              | <10 <sup>6</sup>      | <10 <sup>6</sup>          | <10 <sup>6</sup>       | <10 <sup>6</sup>       | <10 <sup>6</sup>       | <10 <sup>6</sup>      | <10 <sup>6</sup>                      | <10 <sup>6</sup>       | <10 <sup>6</sup>                                                                                                                                                                                                                                                                                                                         | <10 <sup>6</sup>       |
|                                                                                                                                                                                                                                                                                                                              | Absconded                      | <10 <sup>6</sup>      | <10 <sup>6</sup>          | <10 <sup>6</sup>       | <10 <sup>6</sup>       | <10 <sup>6</sup>       | <10 <sup>6</sup>      | <10 <sup>6</sup>                      | <10 <sup>6</sup>       | <10 <sup>6</sup>                                                                                                                                                                                                                                                                                                                         | <10 <sup>6</sup>       |
|                                                                                                                                                                                                                                                                                                                              | Active In                      | 674                   | 545 (80.9)                | 12 (1.8)               | 245 (36.4)             | 33 (4.9)               | <10 <sup>6</sup>      | 153 (22.7)                            | 22 (3.3)               | <10 <sup>6</sup>                                                                                                                                                                                                                                                                                                                         | <10 <sup>6</sup>       |
|                                                                                                                                                                                                                                                                                                                              | Active Out                     | 26                    | 20 (76.9)                 | <10 <sup>6</sup>       | <10 <sup>6</sup>       | <10 <sup>6</sup>       | <10 <sup>6</sup>      | <10 <sup>6</sup>                      | <10 <sup>6</sup>       | <10 <sup>6</sup>                                                                                                                                                                                                                                                                                                                         | <10 <sup>6</sup>       |
|                                                                                                                                                                                                                                                                                                                              | Convicted Sentence             | 36                    | 34 (94.4)                 | <10 <sup>6</sup>       | 15 (41.7)              | <10 <sup>6</sup>       | <10 <sup>6</sup>      | 11 (30.6)                             | <10 <sup>6</sup>       | <10 <sup>6</sup>                                                                                                                                                                                                                                                                                                                         | <10 <sup>6</sup>       |
|                                                                                                                                                                                                                                                                                                                              | Downgrade in security category | <10 <sup>6</sup>      | <10 <sup>6</sup>          | <10 <sup>6</sup>       | <10 <sup>6</sup>       | <10 <sup>6</sup>       | <10 <sup>6</sup>      | <10 <sup>6</sup>                      | <10 <sup>6</sup>       | <10 <sup>6</sup>                                                                                                                                                                                                                                                                                                                         | <10 <sup>6</sup>       |
|                                                                                                                                                                                                                                                                                                                              | Internal Cell Move             | <10 <sup>6</sup>      | <10 <sup>6</sup>          | <10 <sup>6</sup>       | <10 <sup>6</sup>       | <10 <sup>6</sup>       | <10 <sup>6</sup>      | <10 <sup>6</sup>                      | <10 <sup>6</sup>       | <10 <sup>6</sup>                                                                                                                                                                                                                                                                                                                         | <10 <sup>6</sup>       |
|                                                                                                                                                                                                                                                                                                                              | Judges Remand                  | <10 <sup>6</sup>      | <10 <sup>6</sup>          | <10 <sup>6</sup>       | <10 <sup>6</sup>       | <10 <sup>6</sup>       | <10 <sup>6</sup>      | <10 <sup>6</sup>                      | <10 <sup>6</sup>       | <10 <sup>6</sup>                                                                                                                                                                                                                                                                                                                         | <10 <sup>6</sup>       |
|                                                                                                                                                                                                                                                                                                                              | Licence Revoke                 | <10 <sup>6</sup>      | <10 <sup>6</sup>          | <10 <sup>6</sup>       | <10 <sup>6</sup>       | <10 <sup>6</sup>       | <10 <sup>6</sup>      | <10 <sup>6</sup>                      | <10 <sup>6</sup>       | <10 <sup>6</sup>                                                                                                                                                                                                                                                                                                                         | <10 <sup>6</sup>       |
|                                                                                                                                                                                                                                                                                                                              | On Remand                      | 23                    | 21 (91.3)                 | <10 <sup>6</sup>       | 11 (47.8)              | <10 <sup>6</sup>       | <10 <sup>6</sup>      | <10 <sup>6</sup>                      | <10 <sup>6</sup>       | <10 <sup>6</sup>                                                                                                                                                                                                                                                                                                                         | <10 <sup>6</sup>       |
|                                                                                                                                                                                                                                                                                                                              | Transfer                       | <10 <sup>6</sup>      | <10 <sup>6</sup>          | <10 <sup>6</sup>       | <10 <sup>6</sup>       | <10 <sup>6</sup>       | <10 <sup>6</sup>      | <10 <sup>6</sup>                      | <10 <sup>6</sup>       | <10 <sup>6</sup>                                                                                                                                                                                                                                                                                                                         | <10 <sup>6</sup>       |
|                                                                                                                                                                                                                                                                                                                              | Upgrade in security category   | <10 <sup>6</sup>      | <10 <sup>6</sup>          | <10 <sup>6</sup>       | <10 <sup>6</sup>       | <10 <sup>6</sup>       | <10 <sup>6</sup>      | <10 <sup>6</sup>                      | <10 <sup>6</sup>       | <10 <sup>6</sup>                                                                                                                                                                                                                                                                                                                         | <10 <sup>6</sup>       |
| <b>Age - years</b>                                                                                                                                                                                                                                                                                                           |                                |                       |                           |                        |                        |                        |                       |                                       |                        |                                                                                                                                                                                                                                                                                                                                          |                        |
| 2017/18                                                                                                                                                                                                                                                                                                                      | 10 - <20                       | <10 <sup>6</sup>      | <10 <sup>6</sup>          | <10 <sup>6</sup>       | <10 <sup>6</sup>       | <10 <sup>6</sup>       | <10 <sup>6</sup>      | <10 <sup>6</sup>                      | <10 <sup>6</sup>       | <10 <sup>6</sup>                                                                                                                                                                                                                                                                                                                         | <10 <sup>6</sup>       |
|                                                                                                                                                                                                                                                                                                                              | 20 - <30                       | 38                    | 34 (89.5)                 | <10 <sup>6</sup>       | 11 (28.9)              | <10 <sup>6</sup>       | <10 <sup>6</sup>      | <10 <sup>6</sup>                      | <10 <sup>6</sup>       | <10 <sup>6</sup>                                                                                                                                                                                                                                                                                                                         | <10 <sup>6</sup>       |
|                                                                                                                                                                                                                                                                                                                              | 30 - <40                       | 77                    | 58 (75.3)                 | <10 <sup>6</sup>       | 23 (29.9)              | <10 <sup>6</sup>       | <10 <sup>6</sup>      | 14 (18.2)                             | <10 <sup>6</sup>       | <10 <sup>6</sup>                                                                                                                                                                                                                                                                                                                         | <10 <sup>6</sup>       |
|                                                                                                                                                                                                                                                                                                                              | 40 - <50                       | 150                   | 117 (78.0)                | <10 <sup>6</sup>       | 43 (28.7)              | <10 <sup>6</sup>       | <10 <sup>6</sup>      | 24 (16.0)                             | <10 <sup>6</sup>       | <10 <sup>6</sup>                                                                                                                                                                                                                                                                                                                         | <10 <sup>6</sup>       |
|                                                                                                                                                                                                                                                                                                                              | 50 - <60                       | 218                   | 175 (80.3)                | <10 <sup>6</sup>       | 78 (35.8)              | <10 <sup>6</sup>       | <10 <sup>6</sup>      | 52 (23.9)                             | <10 <sup>6</sup>       | <10 <sup>6</sup>                                                                                                                                                                                                                                                                                                                         | <10 <sup>6</sup>       |
|                                                                                                                                                                                                                                                                                                                              | 60 - <70                       | 124                   | 98 (79.0)                 | <10 <sup>6</sup>       | 54 (43.5)              | <10 <sup>6</sup>       | <10 <sup>6</sup>      | 37 (29.8)                             | <10 <sup>6</sup>       | <10 <sup>6</sup>                                                                                                                                                                                                                                                                                                                         | <10 <sup>6</sup>       |
|                                                                                                                                                                                                                                                                                                                              | 70 - <80                       | 52                    | 41 (78.8)                 | <10 <sup>6</sup>       | 22 (42.3)              | <10 <sup>6</sup>       | <10 <sup>6</sup>      | 18 (34.6)                             | <10 <sup>6</sup>       | <10 <sup>6</sup>                                                                                                                                                                                                                                                                                                                         | <10 <sup>6</sup>       |
|                                                                                                                                                                                                                                                                                                                              | 80 - <90                       | 13                    | 10 (76.9)                 | <10 <sup>6</sup>       | <10 <sup>6</sup>       | <10 <sup>6</sup>       | <10 <sup>6</sup>      | <10 <sup>6</sup>                      | <10 <sup>6</sup>       | <10 <sup>6</sup>                                                                                                                                                                                                                                                                                                                         | <10 <sup>6</sup>       |
|                                                                                                                                                                                                                                                                                                                              | 90 - <100                      | <10 <sup>6</sup>      | <10 <sup>6</sup>          | <10 <sup>6</sup>       | <10 <sup>6</sup>       | <10 <sup>6</sup>       | <10 <sup>6</sup>      | <10 <sup>6</sup>                      | <10 <sup>6</sup>       | <10 <sup>6</sup>                                                                                                                                                                                                                                                                                                                         | <10 <sup>6</sup>       |
|                                                                                                                                                                                                                                                                                                                              | 100 - <110                     | <10 <sup>6</sup>      | <10 <sup>6</sup>          | <10 <sup>6</sup>       | <10 <sup>6</sup>       | <10 <sup>6</sup>       | <10 <sup>6</sup>      | <10 <sup>6</sup>                      | <10 <sup>6</sup>       | <10 <sup>6</sup>                                                                                                                                                                                                                                                                                                                         | <10 <sup>6</sup>       |

<sup>1</sup>Eligible for indicator; <sup>2</sup>Achieve in current prison; <sup>3</sup>Achieve in previous prison; <sup>4</sup>Overall achievement - either current or previous prison; <sup>5</sup>Declined indicator; <sup>6</sup>Suppressed (<10) to avoid disclosure



| <p>The proportion of people with diabetes who have had the following in the preceding 12 months: body mass index, blood pressure, record of smoking status, foot examination, urine albumin: creatinine ratio blood tests for HbA1c, cholesterol and serum creatinine</p> <p>Group: Diabetes, Asthma &amp; Epilepsy Care</p> |            |                  |                       |                      |                        |                      |                        |                       |                      |                        |                      |
|------------------------------------------------------------------------------------------------------------------------------------------------------------------------------------------------------------------------------------------------------------------------------------------------------------------------------|------------|------------------|-----------------------|----------------------|------------------------|----------------------|------------------------|-----------------------|----------------------|------------------------|----------------------|
| Indicator                                                                                                                                                                                                                                                                                                                    | Variable   | Population       | Eligible <sup>1</sup> | BMI (% eligible)     |                        | BP (% eligible)      |                        | Hb1Ac (% eligible)    |                      | Chol (% eligible)      |                      |
|                                                                                                                                                                                                                                                                                                                              |            |                  | (% popln)             | Satisfy <sup>2</sup> | Elsewhere <sup>3</sup> | Satisfy <sup>2</sup> | Elsewhere <sup>3</sup> | Declined <sup>5</sup> | Satisfy <sup>2</sup> | Elsewhere <sup>3</sup> | Satisfy <sup>2</sup> |
| 2018/19                                                                                                                                                                                                                                                                                                                      | 10 - <20   | 436              | <10 <sup>6</sup>      | <10 <sup>6</sup>     | <10 <sup>6</sup>       | <10 <sup>6</sup>     | <10 <sup>6</sup>       | <10 <sup>6</sup>      | <10 <sup>6</sup>     | <10 <sup>6</sup>       | <10 <sup>6</sup>     |
|                                                                                                                                                                                                                                                                                                                              | 20 - <30   | 7,163            | 50 (0.7)              | 40 (80.0)            | <10 <sup>6</sup>       | 39 (78.0)            | <10 <sup>6</sup>       | <10 <sup>6</sup>      | 23 (46.0)            | <10 <sup>6</sup>       | 12 (24.0)            |
|                                                                                                                                                                                                                                                                                                                              | 30 - <40   | 7,381            | 106 (1.4)             | 84 (79.2)            | <10 <sup>6</sup>       | 94 (88.7)            | <10 <sup>6</sup>       | <10 <sup>6</sup>      | 49 (46.2)            | <10 <sup>6</sup>       | 38 (35.8)            |
|                                                                                                                                                                                                                                                                                                                              | 40 - <50   | 4,180            | 148 (3.5)             | 128 (86.5)           | <10 <sup>6</sup>       | 128 (86.5)           | <10 <sup>6</sup>       | <10 <sup>6</sup>      | 70 (47.3)            | <10 <sup>6</sup>       | 59 (39.9)            |
|                                                                                                                                                                                                                                                                                                                              | 50 - <60   | 1,978            | 213 (10.8)            | 168 (78.9)           | <10 <sup>6</sup>       | 184 (86.4)           | <10 <sup>6</sup>       | <10 <sup>6</sup>      | 146 (68.5)           | <10 <sup>6</sup>       | 123 (57.7)           |
|                                                                                                                                                                                                                                                                                                                              | 60 - <70   | 701              | 133 (19.0)            | 114 (85.7)           | <10 <sup>6</sup>       | 121 (91.0)           | <10 <sup>6</sup>       | <10 <sup>6</sup>      | 95 (71.4)            | <10 <sup>6</sup>       | 91 (68.4)            |
|                                                                                                                                                                                                                                                                                                                              | 70 - <80   | 209              | 49 (23.4)             | 42 (85.7)            | <10 <sup>6</sup>       | 44 (89.8)            | <10 <sup>6</sup>       | <10 <sup>6</sup>      | 35 (71.4)            | <10 <sup>6</sup>       | 33 (67.3)            |
|                                                                                                                                                                                                                                                                                                                              | 80 - <90   | 45               | 13 (28.9)             | 12 (92.3)            | <10 <sup>6</sup>       | 13 (100.0)           | <10 <sup>6</sup>       | <10 <sup>6</sup>      | 10 (76.9)            | <10 <sup>6</sup>       | <10 <sup>6</sup>     |
|                                                                                                                                                                                                                                                                                                                              | 90 - <100  | <10 <sup>6</sup> | <10 <sup>6</sup>      | <10 <sup>6</sup>     | <10 <sup>6</sup>       | <10 <sup>6</sup>     | <10 <sup>6</sup>       | <10 <sup>6</sup>      | <10 <sup>6</sup>     | <10 <sup>6</sup>       | <10 <sup>6</sup>     |
|                                                                                                                                                                                                                                                                                                                              | 100 - <110 | <10 <sup>6</sup> | <10 <sup>6</sup>      | <10 <sup>6</sup>     | <10 <sup>6</sup>       | <10 <sup>6</sup>     | <10 <sup>6</sup>       | <10 <sup>6</sup>      | <10 <sup>6</sup>     | <10 <sup>6</sup>       | <10 <sup>6</sup>     |
|                                                                                                                                                                                                                                                                                                                              | 2019/20    | 10 - <20         | 404                   | <10 <sup>6</sup>     | <10 <sup>6</sup>       | <10 <sup>6</sup>     | <10 <sup>6</sup>       | <10 <sup>6</sup>      | <10 <sup>6</sup>     | <10 <sup>6</sup>       | <10 <sup>6</sup>     |
| 20 - <30                                                                                                                                                                                                                                                                                                                     |            | 8,064            | 60 (0.7)              | 50 (83.3)            | <10 <sup>6</sup>       | 54 (90.0)            | <10 <sup>6</sup>       | <10 <sup>6</sup>      | 29 (48.3)            | <10 <sup>6</sup>       | 18 (30.0)            |
| 30 - <40                                                                                                                                                                                                                                                                                                                     |            | 9,125            | 100 (1.1)             | 82 (82.0)            | <10 <sup>6</sup>       | 92 (92.0)            | <10 <sup>6</sup>       | <10 <sup>6</sup>      | 50 (50.0)            | <10 <sup>6</sup>       | 43 (43.0)            |
| 40 - <50                                                                                                                                                                                                                                                                                                                     |            | 4,948            | 195 (3.9)             | 168 (86.2)           | <10 <sup>6</sup>       | 179 (91.8)           | <10 <sup>6</sup>       | <10 <sup>6</sup>      | 107 (54.9)           | 15 (7.7)               | 92 (47.2)            |
| 50 - <60                                                                                                                                                                                                                                                                                                                     |            | 2,224            | 193 (8.7)             | 170 (88.1)           | <10 <sup>6</sup>       | 180 (93.3)           | <10 <sup>6</sup>       | <10 <sup>6</sup>      | 128 (66.3)           | <10 <sup>6</sup>       | 113 (58.5)           |
| 60 - <70                                                                                                                                                                                                                                                                                                                     |            | 751              | 152 (20.2)            | 129 (84.9)           | <10 <sup>6</sup>       | 146 (96.1)           | <10 <sup>6</sup>       | <10 <sup>6</sup>      | 110 (72.4)           | <10 <sup>6</sup>       | 101 (66.4)           |
| 70 - <80                                                                                                                                                                                                                                                                                                                     |            | 238              | 57 (23.9)             | 46 (80.7)            | <10 <sup>6</sup>       | 54 (94.7)            | <10 <sup>6</sup>       | <10 <sup>6</sup>      | 37 (64.9)            | <10 <sup>6</sup>       | 32 (56.1)            |
| 80 - <90                                                                                                                                                                                                                                                                                                                     |            | 53               | 11 (20.8)             | 11 (100.0)           | <10 <sup>6</sup>       | 11 (100.0)           | <10 <sup>6</sup>       | <10 <sup>6</sup>      | <10 <sup>6</sup>     | <10 <sup>6</sup>       | <10 <sup>6</sup>     |
| 90 - <100                                                                                                                                                                                                                                                                                                                    |            | <10 <sup>6</sup> | <10 <sup>6</sup>      | <10 <sup>6</sup>     | <10 <sup>6</sup>       | <10 <sup>6</sup>     | <10 <sup>6</sup>       | <10 <sup>6</sup>      | <10 <sup>6</sup>     | <10 <sup>6</sup>       | <10 <sup>6</sup>     |
| 100 - <110                                                                                                                                                                                                                                                                                                                   |            | <10 <sup>6</sup> | <10 <sup>6</sup>      | <10 <sup>6</sup>     | <10 <sup>6</sup>       | <10 <sup>6</sup>     | <10 <sup>6</sup>       | <10 <sup>6</sup>      | <10 <sup>6</sup>     | <10 <sup>6</sup>       | <10 <sup>6</sup>     |
| Length of Stay (months)                                                                                                                                                                                                                                                                                                      |            | <1               | 4,474                 | 94 (2.1)             | 68 (72.3)              | <10 <sup>6</sup>     | 66 (70.2)              | 12 (12.8)             | <10 <sup>6</sup>     | 11 (11.7)              | 14 (14.9)            |
|                                                                                                                                                                                                                                                                                                                              | 1-<6       | 8,075            | 179 (2.2)             | 129 (72.1)           | <10 <sup>6</sup>       | 141 (78.8)           | <10 <sup>6</sup>       | <10 <sup>6</sup>      | 68 (38.0)            | 15 (8.4)               | 48 (26.8)            |
|                                                                                                                                                                                                                                                                                                                              | 6-<12      | 3,672            | 106 (2.9)             | 75 (70.8)            | <10 <sup>6</sup>       | 85 (80.2)            | <10 <sup>6</sup>       | <10 <sup>6</sup>      | 72 (67.9)            | <10 <sup>6</sup>       | 56 (52.8)            |
|                                                                                                                                                                                                                                                                                                                              | 12-<24     | 2,832            | 94 (3.3)              | 65 (69.1)            | <10 <sup>6</sup>       | 77 (81.9)            | <10 <sup>6</sup>       | <10 <sup>6</sup>      | 64 (68.1)            | <10 <sup>6</sup>       | 53 (56.4)            |
|                                                                                                                                                                                                                                                                                                                              | 24+        | 2,624            | 202 (7.7)             | 153 (75.7)           | <10 <sup>6</sup>       | 179 (88.6)           | <10 <sup>6</sup>       | <10 <sup>6</sup>      | 173 (85.6)           | <10 <sup>6</sup>       | 147 (72.8)           |
| 2018/19                                                                                                                                                                                                                                                                                                                      | <1         | 4,801            | 97 (2.0)              | 87 (89.7)            | <10 <sup>6</sup>       | 90 (92.8)            | <10 <sup>6</sup>       | <10 <sup>6</sup>      | <10 <sup>6</sup>     | <10 <sup>6</sup>       | <10 <sup>6</sup>     |
|                                                                                                                                                                                                                                                                                                                              | 1-<6       | 7,742            | 185 (2.4)             | 149 (80.5)           | <10 <sup>6</sup>       | 153 (82.7)           | <10 <sup>6</sup>       | <10 <sup>6</sup>      | 78 (42.2)            | <10 <sup>6</sup>       | 56 (30.3)            |
|                                                                                                                                                                                                                                                                                                                              | 6-<12      | 3,616            | 104 (2.9)             | 75 (72.1)            | <10 <sup>6</sup>       | 85 (81.7)            | <10 <sup>6</sup>       | <10 <sup>6</sup>      | 74 (71.2)            | <10 <sup>6</sup>       | 51 (49.0)            |
|                                                                                                                                                                                                                                                                                                                              | 12-<24     | 3,752            | 138 (3.7)             | 112 (81.2)           | <10 <sup>6</sup>       | 117 (84.8)           | <10 <sup>6</sup>       | <10 <sup>6</sup>      | 94 (68.1)            | 12 (8.7)               | 85 (61.6)            |
|                                                                                                                                                                                                                                                                                                                              | 24+        | 2,188            | 189 (8.6)             | 166 (87.8)           | <10 <sup>6</sup>       | 179 (94.7)           | <10 <sup>6</sup>       | <10 <sup>6</sup>      | 174 (92.1)           | <10 <sup>6</sup>       | 164 (86.8)           |
| 2019/20                                                                                                                                                                                                                                                                                                                      | <1         | 5,745            | 136 (2.4)             | 125 (91.9)           | <10 <sup>6</sup>       | 132 (97.1)           | <10 <sup>6</sup>       | <10 <sup>6</sup>      | 21 (15.4)            | 10 (7.4)               | 20 (14.7)            |
|                                                                                                                                                                                                                                                                                                                              | 1-<6       | 9,697            | 216 (2.2)             | 181 (83.8)           | <10 <sup>6</sup>       | 194 (89.8)           | <10 <sup>6</sup>       | <10 <sup>6</sup>      | 110 (50.9)           | 12 (5.6)               | 81 (37.5)            |
|                                                                                                                                                                                                                                                                                                                              | 6-<12      | 5,090            | 144 (2.8)             | 124 (86.1)           | <10 <sup>6</sup>       | 129 (89.6)           | <10 <sup>6</sup>       | <10 <sup>6</sup>      | 104 (72.2)           | <10 <sup>6</sup>       | 86 (59.7)            |
|                                                                                                                                                                                                                                                                                                                              | 12-<24     | 3,244            | 104 (3.2)             | 88 (84.6)            | <10 <sup>6</sup>       | 99 (95.2)            | <10 <sup>6</sup>       | <10 <sup>6</sup>      | 86 (82.7)            | <10 <sup>6</sup>       | 77 (74.0)            |
|                                                                                                                                                                                                                                                                                                                              | 24+        | 2,035            | 170 (8.4)             | 140 (82.4)           | <10 <sup>6</sup>       | 164 (96.5)           | <10 <sup>6</sup>       | <10 <sup>6</sup>      | 149 (87.6)           | <10 <sup>6</sup>       | 144 (84.7)           |

68.01% of those without moderate or severe frailty have BP of 140/80 or less, 56.66% of those without moderate or severe frailty have HbA1c of 58 or less, 83.34% of those with moderate or severe frailty have HbA1c of 75 or less, 78.04% had foot examination with risk classification. No comparisons for other examinations.

<sup>1</sup>Eligible for indicator; <sup>2</sup>Achieve in current prison; <sup>3</sup>Achieve in previous prison; <sup>4</sup>Overall achievement - either current or previous prison; <sup>5</sup>Declined indicator; <sup>6</sup>Suppressed (<10) to avoid disclosure

| <p>The proportion of people with diabetes who have had the following in the preceding 12 months: body mass index, blood pressure, record of smoking status, foot examination, urine albumin: creatinine ratio blood tests for HbA1c, cholesterol and serum creatinine</p> <p>Group: Diabetes, Asthma &amp; Epilepsy Care</p> |            |                       |                           |                        |                        |                        |                       |                                       |                        |                               | <p>68.01% of those without moderate or severe frailty have BP of 140/80 or less, 56.66% of those without moderate or severe frailty have HbA1c of 58 or less, 83.34% of those with moderate or severe frailty have HbA1c of 75 or less, 78.04% had foot examination with risk classification. No comparisons for other examinations.</p> |                  |
|------------------------------------------------------------------------------------------------------------------------------------------------------------------------------------------------------------------------------------------------------------------------------------------------------------------------------|------------|-----------------------|---------------------------|------------------------|------------------------|------------------------|-----------------------|---------------------------------------|------------------------|-------------------------------|------------------------------------------------------------------------------------------------------------------------------------------------------------------------------------------------------------------------------------------------------------------------------------------------------------------------------------------|------------------|
| Indicator                                                                                                                                                                                                                                                                                                                    | Variable   | Eligible <sup>1</sup> | Smoke Status (% eligible) |                        | Foot Exam (% eligible) |                        |                       | Albumin Creatinine Ratio (% eligible) |                        | Serum Creatinine (% eligible) |                                                                                                                                                                                                                                                                                                                                          |                  |
|                                                                                                                                                                                                                                                                                                                              |            |                       | Satisfy <sup>2</sup>      | Elsewhere <sup>3</sup> | Satisfy <sup>2</sup>   | Elsewhere <sup>3</sup> | Declined <sup>5</sup> | Satisfy <sup>2</sup>                  | Elsewhere <sup>3</sup> | Satisfy <sup>2</sup>          | Elsewhere <sup>3</sup>                                                                                                                                                                                                                                                                                                                   |                  |
| 2018/19                                                                                                                                                                                                                                                                                                                      | 10 - <20   | <10 <sup>0</sup>      | <10 <sup>6</sup>          | <10 <sup>6</sup>       | <10 <sup>6</sup>       | <10 <sup>6</sup>       | <10 <sup>6</sup>      | <10 <sup>6</sup>                      | <10 <sup>6</sup>       | <10 <sup>6</sup>              | <10 <sup>6</sup>                                                                                                                                                                                                                                                                                                                         |                  |
|                                                                                                                                                                                                                                                                                                                              | 20 - <30   | 50                    | 42 (84.0)                 | <10 <sup>6</sup>       | <10 <sup>6</sup>       | <10 <sup>6</sup>       | <10 <sup>6</sup>      | <10 <sup>6</sup>                      | <10 <sup>6</sup>       | <10 <sup>6</sup>              | <10 <sup>6</sup>                                                                                                                                                                                                                                                                                                                         |                  |
|                                                                                                                                                                                                                                                                                                                              | 30 - <40   | 106                   | 86 (81.1)                 | <10 <sup>6</sup>       | 28 (26.4)              | <10 <sup>6</sup>       | <10 <sup>6</sup>      | 17 (16.0)                             | <10 <sup>6</sup>       | <10 <sup>6</sup>              | <10 <sup>6</sup>                                                                                                                                                                                                                                                                                                                         |                  |
|                                                                                                                                                                                                                                                                                                                              | 40 - <50   | 148                   | 123 (83.1)                | <10 <sup>6</sup>       | 42 (28.4)              | <10 <sup>6</sup>       | <10 <sup>6</sup>      | 27 (18.2)                             | <10 <sup>6</sup>       | <10 <sup>6</sup>              | <10 <sup>6</sup>                                                                                                                                                                                                                                                                                                                         |                  |
|                                                                                                                                                                                                                                                                                                                              | 50 - <60   | 213                   | 178 (83.6)                | <10 <sup>6</sup>       | 82 (38.5)              | 10 (4.7)               | <10 <sup>6</sup>      | 67 (31.5)                             | <10 <sup>6</sup>       | <10 <sup>6</sup>              | <10 <sup>6</sup>                                                                                                                                                                                                                                                                                                                         |                  |
|                                                                                                                                                                                                                                                                                                                              | 60 - <70   | 133                   | 116 (87.2)                | <10 <sup>6</sup>       | 60 (45.1)              | <10 <sup>6</sup>       | <10 <sup>6</sup>      | 49 (36.8)                             | <10 <sup>6</sup>       | <10 <sup>6</sup>              | <10 <sup>6</sup>                                                                                                                                                                                                                                                                                                                         |                  |
|                                                                                                                                                                                                                                                                                                                              | 70 - <80   | 49                    | 40 (81.6)                 | <10 <sup>6</sup>       | 22 (44.9)              | <10 <sup>6</sup>       | <10 <sup>6</sup>      | 16 (32.7)                             | <10 <sup>6</sup>       | <10 <sup>6</sup>              | <10 <sup>6</sup>                                                                                                                                                                                                                                                                                                                         |                  |
|                                                                                                                                                                                                                                                                                                                              | 80 - <90   | 13                    | 10 (76.9)                 | <10 <sup>6</sup>       | <10 <sup>6</sup>       | <10 <sup>6</sup>       | <10 <sup>6</sup>      | <10 <sup>6</sup>                      | <10 <sup>6</sup>       | <10 <sup>6</sup>              | <10 <sup>6</sup>                                                                                                                                                                                                                                                                                                                         |                  |
|                                                                                                                                                                                                                                                                                                                              | 90 - <100  | <10 <sup>0</sup>      | <10 <sup>6</sup>          | <10 <sup>6</sup>       | <10 <sup>6</sup>       | <10 <sup>6</sup>       | <10 <sup>6</sup>      | <10 <sup>6</sup>                      | <10 <sup>6</sup>       | <10 <sup>6</sup>              | <10 <sup>6</sup>                                                                                                                                                                                                                                                                                                                         |                  |
|                                                                                                                                                                                                                                                                                                                              | 100 - <110 | <10 <sup>0</sup>      | <10 <sup>6</sup>          | <10 <sup>6</sup>       | <10 <sup>6</sup>       | <10 <sup>6</sup>       | <10 <sup>6</sup>      | <10 <sup>6</sup>                      | <10 <sup>6</sup>       | <10 <sup>6</sup>              | <10 <sup>6</sup>                                                                                                                                                                                                                                                                                                                         |                  |
|                                                                                                                                                                                                                                                                                                                              | 2019/20    | 10 - <20              | <10 <sup>0</sup>          | <10 <sup>6</sup>       | <10 <sup>6</sup>       | <10 <sup>6</sup>       | <10 <sup>6</sup>      | <10 <sup>6</sup>                      | <10 <sup>6</sup>       | <10 <sup>6</sup>              | <10 <sup>6</sup>                                                                                                                                                                                                                                                                                                                         | <10 <sup>6</sup> |
| 20 - <30                                                                                                                                                                                                                                                                                                                     |            | 60                    | 50 (83.3)                 | <10 <sup>6</sup>       | 17 (28.3)              | <10 <sup>6</sup>       | <10 <sup>6</sup>      | 12 (20.0)                             | <10 <sup>6</sup>       | <10 <sup>6</sup>              | <10 <sup>6</sup>                                                                                                                                                                                                                                                                                                                         |                  |
| 30 - <40                                                                                                                                                                                                                                                                                                                     |            | 100                   | 80 (80.0)                 | <10 <sup>6</sup>       | 28 (28.0)              | <10 <sup>6</sup>       | <10 <sup>6</sup>      | 11 (11.0)                             | <10 <sup>6</sup>       | <10 <sup>6</sup>              | <10 <sup>6</sup>                                                                                                                                                                                                                                                                                                                         |                  |
| 40 - <50                                                                                                                                                                                                                                                                                                                     |            | 195                   | 164 (84.1)                | <10 <sup>6</sup>       | 53 (27.2)              | <10 <sup>6</sup>       | <10 <sup>6</sup>      | 31 (15.9)                             | <10 <sup>6</sup>       | <10 <sup>6</sup>              | <10 <sup>6</sup>                                                                                                                                                                                                                                                                                                                         |                  |
| 50 - <60                                                                                                                                                                                                                                                                                                                     |            | 193                   | 159 (82.4)                | <10 <sup>6</sup>       | 81 (42.0)              | 15 (7.8)               | <10 <sup>6</sup>      | 58 (30.1)                             | <10 <sup>6</sup>       | <10 <sup>6</sup>              | <10 <sup>6</sup>                                                                                                                                                                                                                                                                                                                         |                  |
| 60 - <70                                                                                                                                                                                                                                                                                                                     |            | 152                   | 119 (78.3)                | <10 <sup>6</sup>       | 70 (46.1)              | <10 <sup>6</sup>       | <10 <sup>6</sup>      | 40 (26.3)                             | <10 <sup>6</sup>       | <10 <sup>6</sup>              | <10 <sup>6</sup>                                                                                                                                                                                                                                                                                                                         |                  |
| 70 - <80                                                                                                                                                                                                                                                                                                                     |            | 57                    | 47 (82.5)                 | <10 <sup>6</sup>       | 23 (40.4)              | <10 <sup>6</sup>       | <10 <sup>6</sup>      | 15 (26.3)                             | <10 <sup>6</sup>       | <10 <sup>6</sup>              | <10 <sup>6</sup>                                                                                                                                                                                                                                                                                                                         |                  |
| 80 - <90                                                                                                                                                                                                                                                                                                                     |            | 11                    | <10 <sup>6</sup>          | <10 <sup>6</sup>       | <10 <sup>6</sup>       | <10 <sup>6</sup>       | <10 <sup>6</sup>      | <10 <sup>6</sup>                      | <10 <sup>6</sup>       | <10 <sup>6</sup>              | <10 <sup>6</sup>                                                                                                                                                                                                                                                                                                                         |                  |
| 90 - <100                                                                                                                                                                                                                                                                                                                    |            | <10 <sup>0</sup>      | <10 <sup>6</sup>          | <10 <sup>6</sup>       | <10 <sup>6</sup>       | <10 <sup>6</sup>       | <10 <sup>6</sup>      | <10 <sup>6</sup>                      | <10 <sup>6</sup>       | <10 <sup>6</sup>              | <10 <sup>6</sup>                                                                                                                                                                                                                                                                                                                         |                  |
| 100 - <110                                                                                                                                                                                                                                                                                                                   |            | <10 <sup>0</sup>      | <10 <sup>6</sup>          | <10 <sup>6</sup>       | <10 <sup>6</sup>       | <10 <sup>6</sup>       | <10 <sup>6</sup>      | <10 <sup>6</sup>                      | <10 <sup>6</sup>       | <10 <sup>6</sup>              | <10 <sup>6</sup>                                                                                                                                                                                                                                                                                                                         |                  |
| Length of Stay (months)                                                                                                                                                                                                                                                                                                      |            |                       |                           |                        |                        |                        |                       |                                       |                        |                               |                                                                                                                                                                                                                                                                                                                                          |                  |
| 2017/18                                                                                                                                                                                                                                                                                                                      | <1         | 94                    | 65 (69.1)                 | <10 <sup>6</sup>       | <10 <sup>6</sup>       | <10 <sup>6</sup>       | <10 <sup>6</sup>      | <10 <sup>6</sup>                      | <10 <sup>6</sup>       | <10 <sup>6</sup>              | <10 <sup>6</sup>                                                                                                                                                                                                                                                                                                                         |                  |
|                                                                                                                                                                                                                                                                                                                              | 1-6        | 179                   | 141 (78.8)                | <10 <sup>6</sup>       | 32 (17.9)              | <10 <sup>6</sup>       | <10 <sup>6</sup>      | 21 (11.7)                             | <10 <sup>6</sup>       | <10 <sup>6</sup>              | <10 <sup>6</sup>                                                                                                                                                                                                                                                                                                                         |                  |
|                                                                                                                                                                                                                                                                                                                              | 6-12       | 106                   | 79 (74.5)                 | <10 <sup>6</sup>       | 45 (42.5)              | <10 <sup>6</sup>       | <10 <sup>6</sup>      | 15 (14.2)                             | <10 <sup>6</sup>       | <10 <sup>6</sup>              | <10 <sup>6</sup>                                                                                                                                                                                                                                                                                                                         |                  |
|                                                                                                                                                                                                                                                                                                                              | 12-<24     | 94                    | 76 (80.9)                 | <10 <sup>6</sup>       | 46 (48.9)              | <10 <sup>6</sup>       | <10 <sup>6</sup>      | 30 (31.9)                             | <10 <sup>6</sup>       | <10 <sup>6</sup>              | <10 <sup>6</sup>                                                                                                                                                                                                                                                                                                                         |                  |
|                                                                                                                                                                                                                                                                                                                              | 24+        | 202                   | 174 (86.1)                | <10 <sup>6</sup>       | 109 (54.0)             | <10 <sup>6</sup>       | <10 <sup>6</sup>      | 86 (42.6)                             | <10 <sup>6</sup>       | <10 <sup>6</sup>              | <10 <sup>6</sup>                                                                                                                                                                                                                                                                                                                         |                  |
| 2018/19                                                                                                                                                                                                                                                                                                                      | <1         | 97                    | 88 (90.7)                 | <10 <sup>6</sup>       | <10 <sup>6</sup>       | <10 <sup>6</sup>       | <10 <sup>6</sup>      | <10 <sup>6</sup>                      | <10 <sup>6</sup>       | <10 <sup>6</sup>              | <10 <sup>6</sup>                                                                                                                                                                                                                                                                                                                         |                  |
|                                                                                                                                                                                                                                                                                                                              | 1-6        | 185                   | 152 (82.2)                | <10 <sup>6</sup>       | 29 (15.7)              | <10 <sup>6</sup>       | <10 <sup>6</sup>      | 23 (12.4)                             | <10 <sup>6</sup>       | <10 <sup>6</sup>              | <10 <sup>6</sup>                                                                                                                                                                                                                                                                                                                         |                  |
|                                                                                                                                                                                                                                                                                                                              | 6-12       | 104                   | 75 (72.1)                 | <10 <sup>6</sup>       | 44 (42.3)              | <10 <sup>6</sup>       | <10 <sup>6</sup>      | 17 (16.3)                             | <10 <sup>6</sup>       | <10 <sup>6</sup>              | <10 <sup>6</sup>                                                                                                                                                                                                                                                                                                                         |                  |
|                                                                                                                                                                                                                                                                                                                              | 12-<24     | 138                   | 112 (81.2)                | <10 <sup>6</sup>       | 52 (37.7)              | <10 <sup>6</sup>       | <10 <sup>6</sup>      | 46 (33.3)                             | <10 <sup>6</sup>       | <10 <sup>6</sup>              | <10 <sup>6</sup>                                                                                                                                                                                                                                                                                                                         |                  |
|                                                                                                                                                                                                                                                                                                                              | 24+        | 189                   | 168 (88.9)                | <10 <sup>6</sup>       | 121 (64.0)             | <10 <sup>6</sup>       | <10 <sup>6</sup>      | 95 (50.3)                             | <10 <sup>6</sup>       | <10 <sup>6</sup>              | <10 <sup>6</sup>                                                                                                                                                                                                                                                                                                                         |                  |
| 2019/20                                                                                                                                                                                                                                                                                                                      | <1         | 136                   | 112 (82.4)                | <10 <sup>6</sup>       | <10 <sup>6</sup>       | <10 <sup>6</sup>       | <10 <sup>6</sup>      | <10 <sup>6</sup>                      | <10 <sup>6</sup>       | <10 <sup>6</sup>              | <10 <sup>6</sup>                                                                                                                                                                                                                                                                                                                         |                  |
|                                                                                                                                                                                                                                                                                                                              | 1-6        | 216                   | 176 (81.5)                | <10 <sup>6</sup>       | 41 (19.0)              | 12 (5.6)               | <10 <sup>6</sup>      | 27 (12.5)                             | <10 <sup>6</sup>       | <10 <sup>6</sup>              | <10 <sup>6</sup>                                                                                                                                                                                                                                                                                                                         |                  |
|                                                                                                                                                                                                                                                                                                                              | 6-12       | 144                   | 120 (83.3)                | <10 <sup>6</sup>       | 56 (38.9)              | 12 (8.3)               | <10 <sup>6</sup>      | 35 (24.3)                             | 11 (7.6)               | <10 <sup>6</sup>              | <10 <sup>6</sup>                                                                                                                                                                                                                                                                                                                         |                  |
|                                                                                                                                                                                                                                                                                                                              | 12-<24     | 104                   | 80 (76.9)                 | <10 <sup>6</sup>       | 66 (63.5)              | <10 <sup>6</sup>       | <10 <sup>6</sup>      | 42 (40.4)                             | <10 <sup>6</sup>       | <10 <sup>6</sup>              | <10 <sup>6</sup>                                                                                                                                                                                                                                                                                                                         |                  |
|                                                                                                                                                                                                                                                                                                                              | 24+        | 170                   | 141 (82.9)                | <10 <sup>6</sup>       | 111 (65.3)             | <10 <sup>6</sup>       | <10 <sup>6</sup>      | 65 (38.2)                             | <10 <sup>6</sup>       | <10 <sup>6</sup>              | <10 <sup>6</sup>                                                                                                                                                                                                                                                                                                                         |                  |

<sup>1</sup>Eligible for indicator; <sup>2</sup>Achieve in current prison; <sup>3</sup>Achieve in previous prison; <sup>4</sup>Overall achievement - either current or previous prison; <sup>5</sup>Declined indicator; <sup>6</sup>Suppressed (<10) to avoid disclosure

| Indicator                               | The proportion of people with diabetes who have had the following in the preceding 12 months: body mass index, blood pressure, record of smoking status, foot examination, urine albumin: creatinine ratio blood tests for HbA1c, cholesterol and serum creatinine |                                      |                                                           | Community achievement 2019/20 (%): 68.01% of those without moderate or severe frailty have BP of 140/80 or less, 56.66% of those without moderate or severe frailty have HbA1c of 58 or less, 83.34% of those with moderate or severe frailty have HbA1c of 75 or less, 78.04% had foot examination with risk classification. No comparisons for other examinations. |                  |
|-----------------------------------------|--------------------------------------------------------------------------------------------------------------------------------------------------------------------------------------------------------------------------------------------------------------------|--------------------------------------|-----------------------------------------------------------|----------------------------------------------------------------------------------------------------------------------------------------------------------------------------------------------------------------------------------------------------------------------------------------------------------------------------------------------------------------------|------------------|
| Group: Diabetes, Asthma & Epilepsy Care |                                                                                                                                                                                                                                                                    |                                      |                                                           |                                                                                                                                                                                                                                                                                                                                                                      |                  |
| Variable                                | Population                                                                                                                                                                                                                                                         | Eligible <sup>1</sup> (% population) | Achieved <sup>4</sup> 5 of the 8 items/tests (% eligible) |                                                                                                                                                                                                                                                                                                                                                                      |                  |
| <b>Year</b>                             |                                                                                                                                                                                                                                                                    |                                      |                                                           |                                                                                                                                                                                                                                                                                                                                                                      |                  |
| 2017/18                                 | 21,677                                                                                                                                                                                                                                                             | 675 (3.1)                            |                                                           |                                                                                                                                                                                                                                                                                                                                                                      | 341 (50.5)       |
| 2018/19                                 | 22,099                                                                                                                                                                                                                                                             | 713 (3.2)                            |                                                           |                                                                                                                                                                                                                                                                                                                                                                      | 381 (53.4)       |
| 2019/20                                 | 25,811                                                                                                                                                                                                                                                             | 770 (3.0)                            |                                                           |                                                                                                                                                                                                                                                                                                                                                                      | 426 (55.3)       |
| <b>Prison</b>                           |                                                                                                                                                                                                                                                                    |                                      |                                                           |                                                                                                                                                                                                                                                                                                                                                                      |                  |
| 2017/18                                 |                                                                                                                                                                                                                                                                    |                                      |                                                           |                                                                                                                                                                                                                                                                                                                                                                      |                  |
| Prison 1                                | 1,323                                                                                                                                                                                                                                                              | 25 (1.9)                             |                                                           |                                                                                                                                                                                                                                                                                                                                                                      | 14 (56.0)        |
| Prison 2                                | 3,261                                                                                                                                                                                                                                                              | 96 (2.9)                             |                                                           |                                                                                                                                                                                                                                                                                                                                                                      | 43 (44.8)        |
| Prison 3                                | 2,623                                                                                                                                                                                                                                                              | 70 (2.7)                             |                                                           |                                                                                                                                                                                                                                                                                                                                                                      | 44 (62.9)        |
| Prison 4                                | 2,089                                                                                                                                                                                                                                                              | 68 (3.3)                             |                                                           |                                                                                                                                                                                                                                                                                                                                                                      | 37 (54.4)        |
| Prison 5                                | 637                                                                                                                                                                                                                                                                | 22 (3.5)                             |                                                           |                                                                                                                                                                                                                                                                                                                                                                      | 10 (45.5)        |
| Prison 6                                | 1,552                                                                                                                                                                                                                                                              | 54 (3.5)                             |                                                           |                                                                                                                                                                                                                                                                                                                                                                      | 37 (68.5)        |
| Prison 7                                | 635                                                                                                                                                                                                                                                                | 21 (3.3)                             |                                                           |                                                                                                                                                                                                                                                                                                                                                                      | <10 <sup>6</sup> |
| Prison 8                                | 1,085                                                                                                                                                                                                                                                              | 29 (2.7)                             |                                                           |                                                                                                                                                                                                                                                                                                                                                                      | 11 (37.9)        |
| Prison 9                                | 981                                                                                                                                                                                                                                                                | 86 (8.8)                             |                                                           |                                                                                                                                                                                                                                                                                                                                                                      | 63 (73.3)        |
| Prison 10                               | 2,523                                                                                                                                                                                                                                                              | 75 (3.0)                             |                                                           |                                                                                                                                                                                                                                                                                                                                                                      | 15 (20.0)        |
| Prison 11                               | 3,470                                                                                                                                                                                                                                                              | 83 (2.4)                             |                                                           |                                                                                                                                                                                                                                                                                                                                                                      | 20 (24.1)        |
| Prison 12                               | 815                                                                                                                                                                                                                                                                | <10 <sup>6</sup>                     |                                                           |                                                                                                                                                                                                                                                                                                                                                                      | <10 <sup>6</sup> |
| Prison 13                               | 683                                                                                                                                                                                                                                                                | 42 (6.1)                             |                                                           |                                                                                                                                                                                                                                                                                                                                                                      | 35 (83.3)        |
| 2018/19                                 |                                                                                                                                                                                                                                                                    |                                      |                                                           |                                                                                                                                                                                                                                                                                                                                                                      |                  |
| Prison 1                                | 1,333                                                                                                                                                                                                                                                              | 19 (1.4)                             |                                                           |                                                                                                                                                                                                                                                                                                                                                                      | 15 (78.9)        |
| Prison 2                                | 2,705                                                                                                                                                                                                                                                              | 73 (2.7)                             |                                                           |                                                                                                                                                                                                                                                                                                                                                                      | 30 (41.1)        |
| Prison 3                                | 2,522                                                                                                                                                                                                                                                              | 85 (3.4)                             |                                                           |                                                                                                                                                                                                                                                                                                                                                                      | 48 (56.5)        |
| Prison 4                                | 2,349                                                                                                                                                                                                                                                              | 76 (3.2)                             |                                                           |                                                                                                                                                                                                                                                                                                                                                                      | 45 (59.2)        |
| Prison 5                                | 676                                                                                                                                                                                                                                                                | 22 (3.3)                             |                                                           |                                                                                                                                                                                                                                                                                                                                                                      | <10 <sup>6</sup> |
| Prison 6                                | 1,513                                                                                                                                                                                                                                                              | 48 (3.2)                             |                                                           |                                                                                                                                                                                                                                                                                                                                                                      | 33 (68.8)        |
| Prison 7                                | 654                                                                                                                                                                                                                                                                | 19 (2.9)                             |                                                           |                                                                                                                                                                                                                                                                                                                                                                      | 12 (63.2)        |
| Prison 8                                | 1,148                                                                                                                                                                                                                                                              | 34 (3.0)                             |                                                           |                                                                                                                                                                                                                                                                                                                                                                      | 9 (26.5)         |
| Prison 9                                | 996                                                                                                                                                                                                                                                                | 105 (10.5)                           |                                                           |                                                                                                                                                                                                                                                                                                                                                                      | 92 (87.6)        |
| Prison 10                               | 2,717                                                                                                                                                                                                                                                              | 77 (2.8)                             |                                                           |                                                                                                                                                                                                                                                                                                                                                                      | 21 (27.3)        |
| Prison 11                               | 4,020                                                                                                                                                                                                                                                              | 113 (2.8)                            |                                                           |                                                                                                                                                                                                                                                                                                                                                                      | 26 (23.0)        |
| Prison 12                               | 792                                                                                                                                                                                                                                                                | <10 <sup>6</sup>                     |                                                           |                                                                                                                                                                                                                                                                                                                                                                      | <10 <sup>6</sup> |
| Prison 13                               | 674                                                                                                                                                                                                                                                                | 39 (5.8)                             |                                                           |                                                                                                                                                                                                                                                                                                                                                                      | 38 (97.4)        |
| 2019/20                                 |                                                                                                                                                                                                                                                                    |                                      |                                                           |                                                                                                                                                                                                                                                                                                                                                                      |                  |
| Prison 1                                | 1,410                                                                                                                                                                                                                                                              | 37 (2.6)                             |                                                           |                                                                                                                                                                                                                                                                                                                                                                      | 25 (67.6)        |
| Prison 2                                | 2,979                                                                                                                                                                                                                                                              | 77 (2.6)                             |                                                           |                                                                                                                                                                                                                                                                                                                                                                      | 45 (58.4)        |
| Prison 3                                | 2,809                                                                                                                                                                                                                                                              | 88 (3.1)                             |                                                           |                                                                                                                                                                                                                                                                                                                                                                      | 49 (55.7)        |
| Prison 4                                | 2,651                                                                                                                                                                                                                                                              | <10 <sup>6</sup>                     |                                                           |                                                                                                                                                                                                                                                                                                                                                                      | <10 <sup>6</sup> |
| Prison 5                                | 616                                                                                                                                                                                                                                                                | 25 (4.1)                             |                                                           |                                                                                                                                                                                                                                                                                                                                                                      | 19 (76.0)        |
| Prison 6                                | 1,533                                                                                                                                                                                                                                                              | 51 (3.3)                             |                                                           |                                                                                                                                                                                                                                                                                                                                                                      | 37 (72.5)        |
| Prison 7                                | 860                                                                                                                                                                                                                                                                | 29 (3.4)                             |                                                           |                                                                                                                                                                                                                                                                                                                                                                      | 15 (51.7)        |
| Prison 8                                | 1,385                                                                                                                                                                                                                                                              | 44 (3.2)                             |                                                           |                                                                                                                                                                                                                                                                                                                                                                      | 11 (25.0)        |
| Prison 9                                | 1,092                                                                                                                                                                                                                                                              | 128 (11.7)                           |                                                           |                                                                                                                                                                                                                                                                                                                                                                      | 107 (83.6)       |
| Prison 10                               | 3,577                                                                                                                                                                                                                                                              | 97 (2.7)                             |                                                           |                                                                                                                                                                                                                                                                                                                                                                      | 41 (42.3)        |
| Prison 11                               | 5,348                                                                                                                                                                                                                                                              | 138 (2.6)                            |                                                           |                                                                                                                                                                                                                                                                                                                                                                      | 32 (23.2)        |
| Prison 12                               | 805                                                                                                                                                                                                                                                                | <10 <sup>6</sup>                     |                                                           |                                                                                                                                                                                                                                                                                                                                                                      | <10 <sup>6</sup> |
| Prison 13                               | 746                                                                                                                                                                                                                                                                | 46 (6.2)                             |                                                           |                                                                                                                                                                                                                                                                                                                                                                      | 38 (82.6)        |
| <b>Prison category</b>                  |                                                                                                                                                                                                                                                                    |                                      |                                                           |                                                                                                                                                                                                                                                                                                                                                                      |                  |
| 2017/18                                 |                                                                                                                                                                                                                                                                    |                                      |                                                           |                                                                                                                                                                                                                                                                                                                                                                      |                  |
| A                                       | 1,664                                                                                                                                                                                                                                                              | 128 (7.7)                            |                                                           |                                                                                                                                                                                                                                                                                                                                                                      | 98 (76.6)        |
| B                                       | 9,254                                                                                                                                                                                                                                                              | 254 (2.7)                            |                                                           |                                                                                                                                                                                                                                                                                                                                                                      | 78 (30.7)        |
| C                                       | 6,035                                                                                                                                                                                                                                                              | 163 (2.7)                            |                                                           |                                                                                                                                                                                                                                                                                                                                                                      | 95 (58.3)        |
| Closed                                  | 1,720                                                                                                                                                                                                                                                              | 50 (2.9)                             |                                                           |                                                                                                                                                                                                                                                                                                                                                                      | 20 (40.0)        |
| D                                       | 2,189                                                                                                                                                                                                                                                              | 76 (3.5)                             |                                                           |                                                                                                                                                                                                                                                                                                                                                                      | 47 (61.8)        |
| YOI                                     | 815                                                                                                                                                                                                                                                                | <10 <sup>6</sup>                     |                                                           |                                                                                                                                                                                                                                                                                                                                                                      | <10 <sup>6</sup> |
| 2018/19                                 |                                                                                                                                                                                                                                                                    |                                      |                                                           |                                                                                                                                                                                                                                                                                                                                                                      |                  |
| A                                       | 1,670                                                                                                                                                                                                                                                              | 144 (8.6)                            |                                                           |                                                                                                                                                                                                                                                                                                                                                                      | 130 (90.3)       |
| B                                       | 9,442                                                                                                                                                                                                                                                              | 263 (2.8)                            |                                                           |                                                                                                                                                                                                                                                                                                                                                                      | 77 (29.3)        |
| C                                       | 6,204                                                                                                                                                                                                                                                              | 180 (2.9)                            |                                                           |                                                                                                                                                                                                                                                                                                                                                                      | 108 (60.0)       |
| Closed                                  | 1,802                                                                                                                                                                                                                                                              | 53 (2.9)                             |                                                           |                                                                                                                                                                                                                                                                                                                                                                      | 21 (39.6)        |
| D                                       | 2,189                                                                                                                                                                                                                                                              | 70 (3.2)                             |                                                           |                                                                                                                                                                                                                                                                                                                                                                      | 42 (60.0)        |
| YOI                                     | 792                                                                                                                                                                                                                                                                | <10 <sup>6</sup>                     |                                                           |                                                                                                                                                                                                                                                                                                                                                                      | <10 <sup>6</sup> |
| 2019/20                                 |                                                                                                                                                                                                                                                                    |                                      |                                                           |                                                                                                                                                                                                                                                                                                                                                                      |                  |
| A                                       | 1,838                                                                                                                                                                                                                                                              | 174 (9.5)                            |                                                           |                                                                                                                                                                                                                                                                                                                                                                      | 145 (83.3)       |
| B                                       | 11,904                                                                                                                                                                                                                                                             | 312 (2.6)                            |                                                           |                                                                                                                                                                                                                                                                                                                                                                      | 118 (37.8)       |
| C                                       | 6,870                                                                                                                                                                                                                                                              | 131 (1.9)                            |                                                           |                                                                                                                                                                                                                                                                                                                                                                      | 80 (61.1)        |
| Closed                                  | 2,245                                                                                                                                                                                                                                                              | 73 (3.3)                             |                                                           |                                                                                                                                                                                                                                                                                                                                                                      | 26 (35.6)        |
| D                                       | 2,149                                                                                                                                                                                                                                                              | 76 (3.5)                             |                                                           |                                                                                                                                                                                                                                                                                                                                                                      | 56 (73.7)        |
| YOI                                     | 805                                                                                                                                                                                                                                                                | <10 <sup>6</sup>                     |                                                           |                                                                                                                                                                                                                                                                                                                                                                      | <10 <sup>6</sup> |
| <b>Gender</b>                           |                                                                                                                                                                                                                                                                    |                                      |                                                           |                                                                                                                                                                                                                                                                                                                                                                      |                  |
| 2017/18                                 |                                                                                                                                                                                                                                                                    |                                      |                                                           |                                                                                                                                                                                                                                                                                                                                                                      |                  |
| F                                       | 1,699                                                                                                                                                                                                                                                              | 50 (2.9)                             |                                                           |                                                                                                                                                                                                                                                                                                                                                                      | 20 (40.0)        |
| M                                       | 19,977                                                                                                                                                                                                                                                             | 625 (3.1)                            |                                                           |                                                                                                                                                                                                                                                                                                                                                                      | 321 (51.4)       |
| 2018/19                                 |                                                                                                                                                                                                                                                                    |                                      |                                                           |                                                                                                                                                                                                                                                                                                                                                                      |                  |
| F                                       | 1,802                                                                                                                                                                                                                                                              | 52 (2.9)                             |                                                           |                                                                                                                                                                                                                                                                                                                                                                      | 21 (40.4)        |
| M                                       | 20,295                                                                                                                                                                                                                                                             | 661 (3.3)                            |                                                           |                                                                                                                                                                                                                                                                                                                                                                      | 360 (54.5)       |
| 2019/20                                 |                                                                                                                                                                                                                                                                    |                                      |                                                           |                                                                                                                                                                                                                                                                                                                                                                      |                  |
| F                                       | 1,376                                                                                                                                                                                                                                                              | 44 (3.2)                             |                                                           |                                                                                                                                                                                                                                                                                                                                                                      | 11 (25.0)        |
| M                                       | 23,570                                                                                                                                                                                                                                                             | 697 (3.0)                            |                                                           |                                                                                                                                                                                                                                                                                                                                                                      | 400 (57.4)       |

<sup>1</sup>Eligible for indicator; <sup>2</sup>Achieve in current prison; <sup>3</sup>Achieve in previous prison; <sup>4</sup>Overall achievement - either current or previous prison; <sup>5</sup>Declined indicator; <sup>6</sup>Suppressed (<10) to avoid disclosure

| Indicator                               | The proportion of people with diabetes who have had the following in the preceding 12 months: body mass index, blood pressure, record of smoking status, foot examination, urine albumin: creatinine ratio blood tests for HbA1c, cholesterol and serum creatinine |                                      |                                                           | Community achievement 2019/20 (%): 68.01% of those without moderate or severe frailty have BP of 140/80 or less, 56.66% of those without moderate or severe frailty have HbA1c of 58 or less, 83.34% of those with moderate or severe frailty have HbA1c of 75 or less, 78.04% had foot examination with risk classification. No comparisons for other examinations. |
|-----------------------------------------|--------------------------------------------------------------------------------------------------------------------------------------------------------------------------------------------------------------------------------------------------------------------|--------------------------------------|-----------------------------------------------------------|----------------------------------------------------------------------------------------------------------------------------------------------------------------------------------------------------------------------------------------------------------------------------------------------------------------------------------------------------------------------|
| Group: Diabetes, Asthma & Epilepsy Care |                                                                                                                                                                                                                                                                    |                                      |                                                           |                                                                                                                                                                                                                                                                                                                                                                      |
| Variable                                | Population                                                                                                                                                                                                                                                         | Eligible <sup>1</sup> (% population) | Achieved <sup>4</sup> 5 of the 8 items/tests (% eligible) |                                                                                                                                                                                                                                                                                                                                                                      |
| <b>Sentence Status</b>                  |                                                                                                                                                                                                                                                                    |                                      |                                                           |                                                                                                                                                                                                                                                                                                                                                                      |
| 2017/18                                 |                                                                                                                                                                                                                                                                    |                                      |                                                           |                                                                                                                                                                                                                                                                                                                                                                      |
| .                                       | 81                                                                                                                                                                                                                                                                 | <10 <sup>6</sup>                     |                                                           | <10 <sup>6</sup>                                                                                                                                                                                                                                                                                                                                                     |
| Absconded                               | <10 <sup>6</sup>                                                                                                                                                                                                                                                   | <10 <sup>6</sup>                     |                                                           | <10 <sup>6</sup>                                                                                                                                                                                                                                                                                                                                                     |
| Active In                               | 15,872                                                                                                                                                                                                                                                             | 495 (3.1)                            |                                                           | 267 (53.9)                                                                                                                                                                                                                                                                                                                                                           |
| Active Out                              | 1,052                                                                                                                                                                                                                                                              | 33 (3.1)                             |                                                           | 13 (39.4)                                                                                                                                                                                                                                                                                                                                                            |
| Convicted Sentence                      | 2,125                                                                                                                                                                                                                                                              | 68 (3.2)                             |                                                           | 29 (42.6)                                                                                                                                                                                                                                                                                                                                                            |
| Downgrade in security category          | <10 <sup>6</sup>                                                                                                                                                                                                                                                   | <10 <sup>6</sup>                     |                                                           | <10 <sup>6</sup>                                                                                                                                                                                                                                                                                                                                                     |
| Internal Cell Move                      | <10 <sup>6</sup>                                                                                                                                                                                                                                                   | <10 <sup>6</sup>                     |                                                           | <10 <sup>6</sup>                                                                                                                                                                                                                                                                                                                                                     |
| Judges Remand                           | 92                                                                                                                                                                                                                                                                 | <10 <sup>6</sup>                     |                                                           | <10 <sup>6</sup>                                                                                                                                                                                                                                                                                                                                                     |
| Licence Revoke                          | 52                                                                                                                                                                                                                                                                 | <10 <sup>6</sup>                     |                                                           | <10 <sup>6</sup>                                                                                                                                                                                                                                                                                                                                                     |
| On Remand                               | 1,492                                                                                                                                                                                                                                                              | 38 (2.5)                             |                                                           | 16 (42.1)                                                                                                                                                                                                                                                                                                                                                            |
| Transfer                                | 910                                                                                                                                                                                                                                                                | 31 (3.4)                             |                                                           | 16 (51.6)                                                                                                                                                                                                                                                                                                                                                            |
| Upgrade in security category            | <10 <sup>6</sup>                                                                                                                                                                                                                                                   | <10 <sup>6</sup>                     |                                                           | <10 <sup>6</sup>                                                                                                                                                                                                                                                                                                                                                     |
| 2018/19                                 |                                                                                                                                                                                                                                                                    |                                      |                                                           |                                                                                                                                                                                                                                                                                                                                                                      |
| .                                       | 88                                                                                                                                                                                                                                                                 | <10 <sup>6</sup>                     |                                                           | <10 <sup>6</sup>                                                                                                                                                                                                                                                                                                                                                     |
| Absconded                               | <10 <sup>6</sup>                                                                                                                                                                                                                                                   | <10 <sup>6</sup>                     |                                                           | <10 <sup>6</sup>                                                                                                                                                                                                                                                                                                                                                     |
| Active In                               | 18,145                                                                                                                                                                                                                                                             | 589 (3.2)                            |                                                           | 330 (56.0)                                                                                                                                                                                                                                                                                                                                                           |
| Active Out                              | 835                                                                                                                                                                                                                                                                | 34 (4.1)                             |                                                           | 12 (35.3)                                                                                                                                                                                                                                                                                                                                                            |
| Convicted Sentence                      | 1,320                                                                                                                                                                                                                                                              | 38 (2.9)                             |                                                           | 14 (36.8)                                                                                                                                                                                                                                                                                                                                                            |
| Downgrade in security category          | <10 <sup>6</sup>                                                                                                                                                                                                                                                   | <10 <sup>6</sup>                     |                                                           | <10 <sup>6</sup>                                                                                                                                                                                                                                                                                                                                                     |
| Internal Cell Move                      | <10 <sup>6</sup>                                                                                                                                                                                                                                                   | <10 <sup>6</sup>                     |                                                           | <10 <sup>6</sup>                                                                                                                                                                                                                                                                                                                                                     |
| Judges Remand                           | <10 <sup>6</sup>                                                                                                                                                                                                                                                   | <10 <sup>6</sup>                     |                                                           | <10 <sup>6</sup>                                                                                                                                                                                                                                                                                                                                                     |
| Licence Revoke                          | 125                                                                                                                                                                                                                                                                | <10 <sup>6</sup>                     |                                                           | <10 <sup>6</sup>                                                                                                                                                                                                                                                                                                                                                     |
| On Remand                               | 1,059                                                                                                                                                                                                                                                              | 27 (2.5)                             |                                                           | 14 (51.9)                                                                                                                                                                                                                                                                                                                                                            |
| Transfer                                | 518                                                                                                                                                                                                                                                                | 19 (3.7)                             |                                                           | 10 (52.6)                                                                                                                                                                                                                                                                                                                                                            |
| Upgrade in security category            | <10 <sup>6</sup>                                                                                                                                                                                                                                                   | <10 <sup>6</sup>                     |                                                           | <10 <sup>6</sup>                                                                                                                                                                                                                                                                                                                                                     |
| 2019/20                                 |                                                                                                                                                                                                                                                                    |                                      |                                                           |                                                                                                                                                                                                                                                                                                                                                                      |
| .                                       | 69                                                                                                                                                                                                                                                                 | <10 <sup>6</sup>                     |                                                           | <10 <sup>6</sup>                                                                                                                                                                                                                                                                                                                                                     |
| Absconded                               | <10 <sup>6</sup>                                                                                                                                                                                                                                                   | <10 <sup>6</sup>                     |                                                           | <10 <sup>6</sup>                                                                                                                                                                                                                                                                                                                                                     |
| Active In                               | 22,424                                                                                                                                                                                                                                                             | 674 (3.0)                            |                                                           | 381 (56.5)                                                                                                                                                                                                                                                                                                                                                           |
| Active Out                              | 625                                                                                                                                                                                                                                                                | 26 (4.2)                             |                                                           | <10 <sup>6</sup>                                                                                                                                                                                                                                                                                                                                                     |
| Convicted Sentence                      | 1,361                                                                                                                                                                                                                                                              | 36 (2.6)                             |                                                           | 22 (61.1)                                                                                                                                                                                                                                                                                                                                                            |
| Downgrade in security category          | <10 <sup>6</sup>                                                                                                                                                                                                                                                   | <10 <sup>6</sup>                     |                                                           | <10 <sup>6</sup>                                                                                                                                                                                                                                                                                                                                                     |
| Internal Cell Move                      | <10 <sup>6</sup>                                                                                                                                                                                                                                                   | <10 <sup>6</sup>                     |                                                           | <10 <sup>6</sup>                                                                                                                                                                                                                                                                                                                                                     |
| Judges Remand                           | 19                                                                                                                                                                                                                                                                 | <10 <sup>6</sup>                     |                                                           | <10 <sup>6</sup>                                                                                                                                                                                                                                                                                                                                                     |
| Licence Revoke                          | 178                                                                                                                                                                                                                                                                | <10 <sup>6</sup>                     |                                                           | <10 <sup>6</sup>                                                                                                                                                                                                                                                                                                                                                     |
| On Remand                               | 1,031                                                                                                                                                                                                                                                              | 23 (2.2)                             |                                                           | 14 (60.9)                                                                                                                                                                                                                                                                                                                                                            |
| Transfer                                | 101                                                                                                                                                                                                                                                                | <10 <sup>6</sup>                     |                                                           | <10 <sup>6</sup>                                                                                                                                                                                                                                                                                                                                                     |
| Upgrade in security category            | <10 <sup>6</sup>                                                                                                                                                                                                                                                   | <10 <sup>6</sup>                     |                                                           | <10 <sup>6</sup>                                                                                                                                                                                                                                                                                                                                                     |
| <b>Age - years</b>                      |                                                                                                                                                                                                                                                                    |                                      |                                                           |                                                                                                                                                                                                                                                                                                                                                                      |
| 2017/18                                 |                                                                                                                                                                                                                                                                    |                                      |                                                           |                                                                                                                                                                                                                                                                                                                                                                      |
| 10 - <20                                | 468                                                                                                                                                                                                                                                                | <10 <sup>6</sup>                     |                                                           | <10 <sup>6</sup>                                                                                                                                                                                                                                                                                                                                                     |
| 20 - <30                                | 6,994                                                                                                                                                                                                                                                              | 38 (0.5)                             |                                                           | 13 (34.2)                                                                                                                                                                                                                                                                                                                                                            |
| 30 - <40                                | 7,051                                                                                                                                                                                                                                                              | 77 (1.1)                             |                                                           | 32 (41.6)                                                                                                                                                                                                                                                                                                                                                            |
| 40 - <50                                | 4,114                                                                                                                                                                                                                                                              | 150 (3.6)                            |                                                           | 68 (45.3)                                                                                                                                                                                                                                                                                                                                                            |
| 50 - <60                                | 2,107                                                                                                                                                                                                                                                              | 218 (10.3)                           |                                                           | 121 (55.5)                                                                                                                                                                                                                                                                                                                                                           |
| 60 - <70                                | 684                                                                                                                                                                                                                                                                | 124 (18.1)                           |                                                           | 65 (52.4)                                                                                                                                                                                                                                                                                                                                                            |
| 70 - <80                                | 213                                                                                                                                                                                                                                                                | 52 (24.4)                            |                                                           | 31 (59.6)                                                                                                                                                                                                                                                                                                                                                            |
| 80 - <90                                | 40                                                                                                                                                                                                                                                                 | 13 (32.5)                            |                                                           | <10 <sup>6</sup>                                                                                                                                                                                                                                                                                                                                                     |
| 90 - <100                               | <10 <sup>6</sup>                                                                                                                                                                                                                                                   | <10 <sup>6</sup>                     |                                                           | <10 <sup>6</sup>                                                                                                                                                                                                                                                                                                                                                     |
| 100 - <110                              | <10 <sup>6</sup>                                                                                                                                                                                                                                                   | <10 <sup>6</sup>                     |                                                           | <10 <sup>6</sup>                                                                                                                                                                                                                                                                                                                                                     |
| 2018/19                                 |                                                                                                                                                                                                                                                                    |                                      |                                                           |                                                                                                                                                                                                                                                                                                                                                                      |
| 10 - <20                                | 436                                                                                                                                                                                                                                                                | <10 <sup>6</sup>                     |                                                           | <10 <sup>6</sup>                                                                                                                                                                                                                                                                                                                                                     |
| 20 - <30                                | 7,163                                                                                                                                                                                                                                                              | 50 (0.7)                             |                                                           | 18 (36.0)                                                                                                                                                                                                                                                                                                                                                            |
| 30 - <40                                | 7,381                                                                                                                                                                                                                                                              | 106 (1.4)                            |                                                           | 43 (40.6)                                                                                                                                                                                                                                                                                                                                                            |
| 40 - <50                                | 4,180                                                                                                                                                                                                                                                              | 148 (3.5)                            |                                                           | 59 (39.9)                                                                                                                                                                                                                                                                                                                                                            |
| 50 - <60                                | 1,978                                                                                                                                                                                                                                                              | 213 (10.8)                           |                                                           | 125 (58.7)                                                                                                                                                                                                                                                                                                                                                           |
| 60 - <70                                | 701                                                                                                                                                                                                                                                                | 133 (19.0)                           |                                                           | 97 (72.9)                                                                                                                                                                                                                                                                                                                                                            |
| 70 - <80                                | 209                                                                                                                                                                                                                                                                | 49 (23.4)                            |                                                           | 30 (61.2)                                                                                                                                                                                                                                                                                                                                                            |
| 80 - <90                                | 45                                                                                                                                                                                                                                                                 | 13 (28.9)                            |                                                           | <10 <sup>6</sup>                                                                                                                                                                                                                                                                                                                                                     |
| 90 - <100                               | <10 <sup>6</sup>                                                                                                                                                                                                                                                   | <10 <sup>6</sup>                     |                                                           | <10 <sup>6</sup>                                                                                                                                                                                                                                                                                                                                                     |
| 100 - <110                              | <10 <sup>6</sup>                                                                                                                                                                                                                                                   | <10 <sup>6</sup>                     |                                                           | <10 <sup>6</sup>                                                                                                                                                                                                                                                                                                                                                     |
| 2019/20                                 |                                                                                                                                                                                                                                                                    |                                      |                                                           |                                                                                                                                                                                                                                                                                                                                                                      |
| 10 - <20                                | 404                                                                                                                                                                                                                                                                | <10 <sup>6</sup>                     |                                                           | <10 <sup>6</sup>                                                                                                                                                                                                                                                                                                                                                     |
| 20 - <30                                | 8,064                                                                                                                                                                                                                                                              | 60 (0.7)                             |                                                           | 20 (33.3)                                                                                                                                                                                                                                                                                                                                                            |
| 30 - <40                                | 9,125                                                                                                                                                                                                                                                              | 100 (1.1)                            |                                                           | 41 (41.0)                                                                                                                                                                                                                                                                                                                                                            |
| 40 - <50                                | 4,948                                                                                                                                                                                                                                                              | 195 (3.9)                            |                                                           | 101 (51.8)                                                                                                                                                                                                                                                                                                                                                           |
| 50 - <60                                | 2,224                                                                                                                                                                                                                                                              | 193 (8.7)                            |                                                           | 124 (64.2)                                                                                                                                                                                                                                                                                                                                                           |
| 60 - <70                                | 751                                                                                                                                                                                                                                                                | 152 (20.2)                           |                                                           | 95 (62.5)                                                                                                                                                                                                                                                                                                                                                            |
| 70 - <80                                | 238                                                                                                                                                                                                                                                                | 57 (23.9)                            |                                                           | 36 (63.2)                                                                                                                                                                                                                                                                                                                                                            |
| 80 - <90                                | 53                                                                                                                                                                                                                                                                 | 11 (20.8)                            |                                                           | <10 <sup>6</sup>                                                                                                                                                                                                                                                                                                                                                     |
| 90 - <100                               | <10 <sup>6</sup>                                                                                                                                                                                                                                                   | <10 <sup>6</sup>                     |                                                           | <10 <sup>6</sup>                                                                                                                                                                                                                                                                                                                                                     |
| 100 - <110                              | <10 <sup>6</sup>                                                                                                                                                                                                                                                   | <10 <sup>6</sup>                     |                                                           | <10 <sup>6</sup>                                                                                                                                                                                                                                                                                                                                                     |

<sup>1</sup>Eligible for indicator; <sup>2</sup>Achieve in current prison; <sup>3</sup>Achieve in previous prison; <sup>4</sup>Overall achievement - either current or previous prison; <sup>5</sup>Declined indicator; <sup>6</sup>Suppressed (<10) to avoid disclosure

| Indicator                               | The proportion of people with diabetes who have had the following in the preceding 12 months: body mass index, blood pressure, record of smoking status, foot examination, urine albumin: creatinine ratio blood tests for HbA1c, cholesterol and serum creatinine |                                      |                                                           | Community achievement 2019/20 (%): 68.01% of those without moderate or severe frailty have BP of 140/80 or less, 56.66% of those without moderate or severe frailty have HbA1c of 58 or less, 83.34% of those with moderate or severe frailty have HbA1c of 75 or less, 78.04% had foot examination with risk classification. No comparisons for other examinations. |
|-----------------------------------------|--------------------------------------------------------------------------------------------------------------------------------------------------------------------------------------------------------------------------------------------------------------------|--------------------------------------|-----------------------------------------------------------|----------------------------------------------------------------------------------------------------------------------------------------------------------------------------------------------------------------------------------------------------------------------------------------------------------------------------------------------------------------------|
| Group: Diabetes, Asthma & Epilepsy Care |                                                                                                                                                                                                                                                                    |                                      |                                                           |                                                                                                                                                                                                                                                                                                                                                                      |
| Variable                                | Population                                                                                                                                                                                                                                                         | Eligible <sup>1</sup> (% population) | Achieved <sup>4</sup> 5 of the 8 items/tests (% eligible) |                                                                                                                                                                                                                                                                                                                                                                      |
| <b>Length of Stay (months)</b>          |                                                                                                                                                                                                                                                                    |                                      |                                                           |                                                                                                                                                                                                                                                                                                                                                                      |
| 2017/18                                 | <1                                                                                                                                                                                                                                                                 | 4,474                                | 94 (2.1)                                                  | 17 (18.1)                                                                                                                                                                                                                                                                                                                                                            |
|                                         | 1-<6                                                                                                                                                                                                                                                               | 8,075                                | 179 (2.2)                                                 | 57 (31.8)                                                                                                                                                                                                                                                                                                                                                            |
|                                         | 6-<12                                                                                                                                                                                                                                                              | 3,672                                | 106 (2.9)                                                 | 58 (54.7)                                                                                                                                                                                                                                                                                                                                                            |
|                                         | 12-<24                                                                                                                                                                                                                                                             | 2,832                                | 94 (3.3)                                                  | 57 (60.6)                                                                                                                                                                                                                                                                                                                                                            |
|                                         | 24+                                                                                                                                                                                                                                                                | 2,624                                | 202 (7.7)                                                 | 152 (75.2)                                                                                                                                                                                                                                                                                                                                                           |
| 2018/19                                 | <1                                                                                                                                                                                                                                                                 | 4,801                                | 97 (2.0)                                                  | 12 (12.4)                                                                                                                                                                                                                                                                                                                                                            |
|                                         | 1-<6                                                                                                                                                                                                                                                               | 7,742                                | 185 (2.4)                                                 | 58 (31.4)                                                                                                                                                                                                                                                                                                                                                            |
|                                         | 6-<12                                                                                                                                                                                                                                                              | 3,616                                | 104 (2.9)                                                 | 59 (56.7)                                                                                                                                                                                                                                                                                                                                                            |
|                                         | 12-<24                                                                                                                                                                                                                                                             | 3,752                                | 138 (3.7)                                                 | 94 (68.1)                                                                                                                                                                                                                                                                                                                                                            |
|                                         | 24+                                                                                                                                                                                                                                                                | 2,188                                | 189 (8.6)                                                 | 158 (83.6)                                                                                                                                                                                                                                                                                                                                                           |
| 2019/20                                 | <1                                                                                                                                                                                                                                                                 | 5,745                                | 136 (2.4)                                                 | 22 (16.2)                                                                                                                                                                                                                                                                                                                                                            |
|                                         | 1-<6                                                                                                                                                                                                                                                               | 9,697                                | 216 (2.2)                                                 | 91 (42.1)                                                                                                                                                                                                                                                                                                                                                            |
|                                         | 6-<12                                                                                                                                                                                                                                                              | 5,090                                | 144 (2.8)                                                 | 100 (69.4)                                                                                                                                                                                                                                                                                                                                                           |
|                                         | 12-<24                                                                                                                                                                                                                                                             | 3,244                                | 104 (3.2)                                                 | 78 (75.0)                                                                                                                                                                                                                                                                                                                                                            |
|                                         | 24+                                                                                                                                                                                                                                                                | 2,035                                | 170 (8.4)                                                 | 135 (79.4)                                                                                                                                                                                                                                                                                                                                                           |
| <b>Ethnic Group</b>                     |                                                                                                                                                                                                                                                                    |                                      |                                                           |                                                                                                                                                                                                                                                                                                                                                                      |
| 2017/18                                 | White                                                                                                                                                                                                                                                              | 15,638                               | 524 (3.4)                                                 | 274 (52.3)                                                                                                                                                                                                                                                                                                                                                           |
|                                         | Mixed                                                                                                                                                                                                                                                              | 431                                  | 14 (3.2)                                                  | <10 <sup>6</sup>                                                                                                                                                                                                                                                                                                                                                     |
|                                         | Asian or Asian British                                                                                                                                                                                                                                             | 813                                  | 32 (3.9)                                                  | 17 (53.1)                                                                                                                                                                                                                                                                                                                                                            |
|                                         | Black or Black British                                                                                                                                                                                                                                             | 404                                  | 13 (3.2)                                                  | <10 <sup>6</sup>                                                                                                                                                                                                                                                                                                                                                     |
|                                         | Chinese and Other                                                                                                                                                                                                                                                  | 214                                  | 10 (4.7)                                                  | <10 <sup>6</sup>                                                                                                                                                                                                                                                                                                                                                     |
|                                         | Unclassified                                                                                                                                                                                                                                                       | 372                                  | 15 (4.0)                                                  | <10 <sup>6</sup>                                                                                                                                                                                                                                                                                                                                                     |
| 2018/19                                 | White                                                                                                                                                                                                                                                              | 14,911                               | 509 (3.4)                                                 | 281 (55.2)                                                                                                                                                                                                                                                                                                                                                           |
|                                         | Mixed                                                                                                                                                                                                                                                              | 371                                  | 10 (2.7)                                                  | <10 <sup>6</sup>                                                                                                                                                                                                                                                                                                                                                     |
|                                         | Asian or Asian British                                                                                                                                                                                                                                             | 726                                  | 31 (4.3)                                                  | 17 (54.8)                                                                                                                                                                                                                                                                                                                                                            |
|                                         | Black or Black British                                                                                                                                                                                                                                             | 364                                  | 16 (4.4)                                                  | <10 <sup>6</sup>                                                                                                                                                                                                                                                                                                                                                     |
|                                         | Chinese and Other                                                                                                                                                                                                                                                  | 167                                  | <10 <sup>6</sup>                                          | <10 <sup>6</sup>                                                                                                                                                                                                                                                                                                                                                     |
|                                         | Unclassified                                                                                                                                                                                                                                                       | 409                                  | <10 <sup>6</sup>                                          | <10 <sup>6</sup>                                                                                                                                                                                                                                                                                                                                                     |
| 2019/20                                 | White                                                                                                                                                                                                                                                              | 16,606                               | 499 (3.0)                                                 | 294 (58.9)                                                                                                                                                                                                                                                                                                                                                           |
|                                         | Mixed                                                                                                                                                                                                                                                              | 409                                  | 11 (2.7)                                                  | <10 <sup>6</sup>                                                                                                                                                                                                                                                                                                                                                     |
|                                         | Asian or Asian British                                                                                                                                                                                                                                             | 755                                  | 46 (6.1)                                                  | 29 (63.0)                                                                                                                                                                                                                                                                                                                                                            |
|                                         | Black or Black British                                                                                                                                                                                                                                             | 451                                  | 21 (4.7)                                                  | 12 (57.1)                                                                                                                                                                                                                                                                                                                                                            |
|                                         | Chinese and Other                                                                                                                                                                                                                                                  | 163                                  | <10 <sup>6</sup>                                          | <10 <sup>6</sup>                                                                                                                                                                                                                                                                                                                                                     |
|                                         | Unclassified                                                                                                                                                                                                                                                       | 387                                  | <10 <sup>6</sup>                                          | <10 <sup>6</sup>                                                                                                                                                                                                                                                                                                                                                     |

<sup>1</sup>Eligible for indicator; <sup>2</sup>Achieve in current prison; <sup>3</sup>Achieve in previous prison; <sup>4</sup>Overall achievement - either current or previous prison; <sup>5</sup>Declined indicator; <sup>6</sup>Suppressed (<10) to avoid disclosure

| Indicator              | The proportion of people with diabetes without moderate or severe frailty, in whom the last HbA1c is 58 mmol/mol or less in the preceding 12 months |            |                                 |                                   |                                     | Community achievement<br>2019/20: 56.66% (QOF<br>19/20) |
|------------------------|-----------------------------------------------------------------------------------------------------------------------------------------------------|------------|---------------------------------|-----------------------------------|-------------------------------------|---------------------------------------------------------|
|                        | Group: Diabetes, Asthma & Epilepsy Care                                                                                                             |            |                                 |                                   |                                     |                                                         |
|                        | Variable                                                                                                                                            | Population | Eligible <sup>1</sup> (% popln) | Satisfy <sup>2</sup> (% eligible) | Elsewhere <sup>3</sup> (% eligible) | Achieve <sup>4</sup> (% eligible)                       |
| <b>Year</b>            |                                                                                                                                                     |            |                                 |                                   |                                     |                                                         |
|                        | 2017/18                                                                                                                                             | 21,677     | 666 (3.1)                       | 215 (32.3)                        | 16 (2.4)                            | 231 (34.7)                                              |
|                        | 2018/19                                                                                                                                             | 22,099     | 706 (3.2)                       | 233 (33.0)                        | 17 (2.4)                            | 250 (35.4)                                              |
|                        | 2019/20                                                                                                                                             | 25,811     | 756 (2.9)                       | 242 (32.0)                        | 18 (2.4)                            | 260 (34.4)                                              |
| <b>Prison</b>          |                                                                                                                                                     |            |                                 |                                   |                                     |                                                         |
| 2017/18                | Prison 1                                                                                                                                            | 1,323      | 25 (1.9)                        | 10 (40.0)                         | <10 <sup>6</sup>                    | 11 (44.0)                                               |
|                        | Prison 2                                                                                                                                            | 3,261      | 96 (2.9)                        | 26 (27.1)                         | <10 <sup>6</sup>                    | 26 (27.1)                                               |
|                        | Prison 3                                                                                                                                            | 2,623      | 65 (2.5)                        | 19 (29.2)                         | <10 <sup>6</sup>                    | 26 (40.0)                                               |
|                        | Prison 4                                                                                                                                            | 2,089      | 67 (3.2)                        | 25 (37.3)                         | <10 <sup>6</sup>                    | 26 (38.8)                                               |
|                        | Prison 5                                                                                                                                            | 637        | 22 (3.5)                        | <10 <sup>6</sup>                  | <10 <sup>6</sup>                    | <10 <sup>6</sup>                                        |
|                        | Prison 6                                                                                                                                            | 1,552      | 54 (3.5)                        | 31 (57.4)                         | <10 <sup>6</sup>                    | 31 (57.4)                                               |
|                        | Prison 7                                                                                                                                            | 635        | 21 (3.3)                        | <10 <sup>6</sup>                  | <10 <sup>6</sup>                    | <10 <sup>6</sup>                                        |
|                        | Prison 8                                                                                                                                            | 1,085      | 29 (2.7)                        | <10 <sup>6</sup>                  | <10 <sup>6</sup>                    | <10 <sup>6</sup>                                        |
|                        | Prison 9                                                                                                                                            | 981        | 86 (8.8)                        | 38 (44.2)                         | <10 <sup>6</sup>                    | 40 (46.5)                                               |
|                        | Prison 10                                                                                                                                           | 2,523      | 75 (3.0)                        | 15 (20.0)                         | <10 <sup>6</sup>                    | 15 (20.0)                                               |
|                        | Prison 11                                                                                                                                           | 3,470      | 80 (2.3)                        | 11 (13.8)                         | <10 <sup>6</sup>                    | 15 (18.8)                                               |
|                        | Prison 12                                                                                                                                           | 815        | <10 <sup>6</sup>                | <10 <sup>6</sup>                  | <10 <sup>6</sup>                    | <10 <sup>6</sup>                                        |
|                        | Prison 13                                                                                                                                           | 683        | 42 (6.1)                        | 16 (38.1)                         | <10 <sup>6</sup>                    | 16 (38.1)                                               |
| 2018/19                | Prison 1                                                                                                                                            | 1,333      | 19 (1.4)                        | 10 (52.6)                         | <10 <sup>6</sup>                    | 10 (52.6)                                               |
|                        | Prison 2                                                                                                                                            | 2,705      | 73 (2.7)                        | 19 (26.0)                         | <10 <sup>6</sup>                    | 21 (28.8)                                               |
|                        | Prison 3                                                                                                                                            | 2,522      | 81 (3.2)                        | 26 (32.1)                         | <10 <sup>6</sup>                    | 28 (34.6)                                               |
|                        | Prison 4                                                                                                                                            | 2,349      | 75 (3.2)                        | 28 (37.3)                         | <10 <sup>6</sup>                    | 29 (38.7)                                               |
|                        | Prison 5                                                                                                                                            | 676        | 22 (3.3)                        | <10 <sup>6</sup>                  | <10 <sup>6</sup>                    | <10 <sup>6</sup>                                        |
|                        | Prison 6                                                                                                                                            | 1,513      | 48 (3.2)                        | 23 (47.9)                         | <10 <sup>6</sup>                    | 25 (52.1)                                               |
|                        | Prison 7                                                                                                                                            | 654        | 19 (2.9)                        | <10 <sup>6</sup>                  | <10 <sup>6</sup>                    | <10 <sup>6</sup>                                        |
|                        | Prison 8                                                                                                                                            | 1,148      | 34 (3.0)                        | <10 <sup>6</sup>                  | <10 <sup>6</sup>                    | <10 <sup>6</sup>                                        |
|                        | Prison 9                                                                                                                                            | 996        | 105 (10.5)                      | 53 (50.5)                         | <10 <sup>6</sup>                    | 55 (52.4)                                               |
|                        | Prison 10                                                                                                                                           | 2,717      | 77 (2.8)                        | 14 (18.2)                         | <10 <sup>6</sup>                    | 15 (19.5)                                               |
|                        | Prison 11                                                                                                                                           | 4,020      | 111 (2.8)                       | 20 (18.0)                         | <10 <sup>6</sup>                    | 24 (21.6)                                               |
|                        | Prison 12                                                                                                                                           | 792        | <10 <sup>6</sup>                | <10 <sup>6</sup>                  | <10 <sup>6</sup>                    | <10 <sup>6</sup>                                        |
|                        | Prison 13                                                                                                                                           | 674        | 39 (5.8)                        | 13 (33.3)                         | <10 <sup>6</sup>                    | 15 (38.5)                                               |
| 2019/20                | Prison 1                                                                                                                                            | 1,410      | 37 (2.6)                        | 15 (40.5)                         | <10 <sup>6</sup>                    | 16 (43.2)                                               |
|                        | Prison 2                                                                                                                                            | 2,979      | 74 (2.5)                        | 27 (36.5)                         | <10 <sup>6</sup>                    | 28 (37.8)                                               |
|                        | Prison 3                                                                                                                                            | 2,809      | 83 (3.0)                        | 33 (39.8)                         | <10 <sup>6</sup>                    | 36 (43.4)                                               |
|                        | Prison 4                                                                                                                                            | 2,651      | <10 <sup>6</sup>                | <10 <sup>6</sup>                  | <10 <sup>6</sup>                    | <10 <sup>6</sup>                                        |
|                        | Prison 5                                                                                                                                            | 616        | 25 (4.1)                        | <10 <sup>6</sup>                  | <10 <sup>6</sup>                    | 13 (52.0)                                               |
|                        | Prison 6                                                                                                                                            | 1,533      | 51 (3.3)                        | 28 (54.9)                         | <10 <sup>6</sup>                    | 30 (58.8)                                               |
|                        | Prison 7                                                                                                                                            | 860        | 29 (3.4)                        | 12 (41.4)                         | <10 <sup>6</sup>                    | 12 (41.4)                                               |
|                        | Prison 8                                                                                                                                            | 1,385      | 44 (3.2)                        | 10 (22.7)                         | <10 <sup>6</sup>                    | 11 (25.0)                                               |
|                        | Prison 9                                                                                                                                            | 1,092      | 125 (11.4)                      | 58 (46.4)                         | <10 <sup>6</sup>                    | 61 (48.8)                                               |
|                        | Prison 10                                                                                                                                           | 3,577      | 97 (2.7)                        | 22 (22.7)                         | <10 <sup>6</sup>                    | 22 (22.7)                                               |
|                        | Prison 11                                                                                                                                           | 5,348      | 135 (2.5)                       | 15 (11.1)                         | <10 <sup>6</sup>                    | 18 (13.3)                                               |
|                        | Prison 12                                                                                                                                           | 805        | <10 <sup>6</sup>                | <10 <sup>6</sup>                  | <10 <sup>6</sup>                    | <10 <sup>6</sup>                                        |
|                        | Prison 13                                                                                                                                           | 746        | 46 (6.2)                        | 10 (21.7)                         | <10 <sup>6</sup>                    | 10 (21.7)                                               |
| <b>Prison category</b> |                                                                                                                                                     |            |                                 |                                   |                                     |                                                         |
| 2017/18                | A                                                                                                                                                   | 1,664      | 128 (7.7)                       | 54 (42.2)                         | <10 <sup>6</sup>                    | 56 (43.8)                                               |
|                        | B                                                                                                                                                   | 9,254      | 251 (2.7)                       | 52 (20.7)                         | <10 <sup>6</sup>                    | 56 (22.3)                                               |
|                        | C                                                                                                                                                   | 6,035      | 157 (2.6)                       | 54 (34.4)                         | <10 <sup>6</sup>                    | 63 (40.1)                                               |
|                        | Closed                                                                                                                                              | 1,720      | 50 (2.9)                        | 15 (30.0)                         | <10 <sup>6</sup>                    | 16 (32.0)                                               |
|                        | D                                                                                                                                                   | 2,189      | 76 (3.5)                        | 38 (50.0)                         | <10 <sup>6</sup>                    | 38 (50.0)                                               |
|                        | YOI                                                                                                                                                 | 815        | <10 <sup>6</sup>                | <10 <sup>6</sup>                  | <10 <sup>6</sup>                    | <10 <sup>6</sup>                                        |
| 2018/19                | A                                                                                                                                                   | 1,670      | 144 (8.6)                       | 66 (45.8)                         | <10 <sup>6</sup>                    | 70 (48.6)                                               |
|                        | B                                                                                                                                                   | 9,442      | 261 (2.8)                       | 53 (20.3)                         | <10 <sup>6</sup>                    | 60 (23.0)                                               |
|                        | C                                                                                                                                                   | 6,204      | 175 (2.8)                       | 64 (36.6)                         | <10 <sup>6</sup>                    | 67 (38.3)                                               |
|                        | Closed                                                                                                                                              | 1,802      | 53 (2.9)                        | 17 (32.1)                         | <10 <sup>6</sup>                    | 18 (34.0)                                               |
|                        | D                                                                                                                                                   | 2,189      | 70 (3.2)                        | 31 (44.3)                         | <10 <sup>6</sup>                    | 33 (47.1)                                               |
|                        | YOI                                                                                                                                                 | 792        | <10 <sup>6</sup>                | <10 <sup>6</sup>                  | <10 <sup>6</sup>                    | <10 <sup>6</sup>                                        |
| 2019/20                | A                                                                                                                                                   | 1,838      | 171 (9.3)                       | 68 (39.8)                         | <10 <sup>6</sup>                    | 71 (41.5)                                               |
|                        | B                                                                                                                                                   | 11,904     | 306 (2.6)                       | 64 (20.9)                         | <10 <sup>6</sup>                    | 68 (22.2)                                               |
|                        | C                                                                                                                                                   | 6,870      | 126 (1.8)                       | 51 (40.5)                         | <10 <sup>6</sup>                    | 55 (43.7)                                               |
|                        | Closed                                                                                                                                              | 2,245      | 73 (3.3)                        | 22 (30.1)                         | <10 <sup>6</sup>                    | 23 (31.5)                                               |
|                        | D                                                                                                                                                   | 2,149      | 76 (3.5)                        | 37 (48.7)                         | <10 <sup>6</sup>                    | 43 (56.6)                                               |
|                        | YOI                                                                                                                                                 | 805        | <10 <sup>6</sup>                | <10 <sup>6</sup>                  | <10 <sup>6</sup>                    | <10 <sup>6</sup>                                        |
| <b>Gender</b>          |                                                                                                                                                     |            |                                 |                                   |                                     |                                                         |
| 2017/18                | F                                                                                                                                                   | 1,699      | 50 (2.9)                        | 15 (30.0)                         | <10 <sup>6</sup>                    | 16 (32.0)                                               |
|                        | M                                                                                                                                                   | 19,977     | 616 (3.1)                       | 200 (32.5)                        | 15 (2.4)                            | 215 (34.9)                                              |
| 2018/19                | F                                                                                                                                                   | 1,802      | 52 (2.9)                        | 17 (32.7)                         | <10 <sup>6</sup>                    | 18 (34.6)                                               |
|                        | M                                                                                                                                                   | 20,295     | 654 (3.2)                       | 216 (33.0)                        | 16 (2.4)                            | 232 (35.5)                                              |
| 2019/20                | F                                                                                                                                                   | 1,376      | 44 (3.2)                        | 10 (22.7)                         | <10 <sup>6</sup>                    | 11 (25.0)                                               |
|                        | M                                                                                                                                                   | 23,570     | 683 (2.9)                       | 220 (32.2)                        | 17 (2.5)                            | 237 (34.7)                                              |

<sup>1</sup>Eligible for indicator; <sup>2</sup>Achieve in current prison; <sup>3</sup>Achieve in previous prison; <sup>4</sup>Overall achievement - either current or previous prison; <sup>5</sup>Declined indicator; <sup>6</sup>Suppressed (<10) to avoid disclosure

| Indicator                               | The proportion of people with diabetes without moderate or severe frailty, in whom the last HbA1c is 58 mmol/mol or less in the preceding 12 months |                                 |                                   |                                     |                                   | Community achievement<br>2019/20: 56.66% (QOF<br>19/20) |
|-----------------------------------------|-----------------------------------------------------------------------------------------------------------------------------------------------------|---------------------------------|-----------------------------------|-------------------------------------|-----------------------------------|---------------------------------------------------------|
| Group: Diabetes, Asthma & Epilepsy Care |                                                                                                                                                     |                                 |                                   |                                     |                                   |                                                         |
| Variable                                | Population                                                                                                                                          | Eligible <sup>1</sup> (% popln) | Satisfy <sup>2</sup> (% eligible) | Elsewhere <sup>3</sup> (% eligible) | Achieve <sup>4</sup> (% eligible) |                                                         |
| <b>Sentence Status</b>                  |                                                                                                                                                     |                                 |                                   |                                     |                                   |                                                         |
| 2017/18                                 | .                                                                                                                                                   | 81                              | <10 <sup>6</sup>                  | <10 <sup>6</sup>                    | <10 <sup>6</sup>                  | <10 <sup>6</sup>                                        |
|                                         | Absconded                                                                                                                                           | <10 <sup>6</sup>                | <10 <sup>6</sup>                  | <10 <sup>6</sup>                    | <10 <sup>6</sup>                  | <10 <sup>6</sup>                                        |
|                                         | Active In                                                                                                                                           | 15,872                          | 486 (3.1)                         | 159 (32.7)                          | 16 (3.3)                          | 175 (36.0)                                              |
|                                         | Active Out                                                                                                                                          | 1,052                           | 33 (3.1)                          | 13 (39.4)                           | <10 <sup>6</sup>                  | 13 (39.4)                                               |
|                                         | Convicted Sentence                                                                                                                                  | 2,125                           | 68 (3.2)                          | 19 (27.9)                           | <10 <sup>6</sup>                  | 19 (27.9)                                               |
|                                         | Downgrade in security category                                                                                                                      | <10 <sup>6</sup>                | <10 <sup>6</sup>                  | <10 <sup>6</sup>                    | <10 <sup>6</sup>                  | <10 <sup>6</sup>                                        |
|                                         | Internal Cell Move                                                                                                                                  | <10 <sup>6</sup>                | <10 <sup>6</sup>                  | <10 <sup>6</sup>                    | <10 <sup>6</sup>                  | <10 <sup>6</sup>                                        |
|                                         | Judges Remand                                                                                                                                       | 92                              | <10 <sup>6</sup>                  | <10 <sup>6</sup>                    | <10 <sup>6</sup>                  | <10 <sup>6</sup>                                        |
|                                         | Licence Revoke                                                                                                                                      | 52                              | <10 <sup>6</sup>                  | <10 <sup>6</sup>                    | <10 <sup>6</sup>                  | <10 <sup>6</sup>                                        |
|                                         | On Remand                                                                                                                                           | 1,492                           | 38 (2.5)                          | <10 <sup>6</sup>                    | <10 <sup>6</sup>                  | <10 <sup>6</sup>                                        |
|                                         | Transfer                                                                                                                                            | 910                             | 31 (3.4)                          | 15 (48.4)                           | <10 <sup>6</sup>                  | 15 (48.4)                                               |
|                                         | Upgrade in security category                                                                                                                        | <10 <sup>6</sup>                | <10 <sup>6</sup>                  | <10 <sup>6</sup>                    | <10 <sup>6</sup>                  | <10 <sup>6</sup>                                        |
| 2018/19                                 | .                                                                                                                                                   | <10 <sup>6</sup>                | <10 <sup>6</sup>                  | <10 <sup>6</sup>                    | <10 <sup>6</sup>                  | <10 <sup>6</sup>                                        |
|                                         | Absconded                                                                                                                                           | <10 <sup>6</sup>                | <10 <sup>6</sup>                  | <10 <sup>6</sup>                    | <10 <sup>6</sup>                  | <10 <sup>6</sup>                                        |
|                                         | Active In                                                                                                                                           | 18,145                          | 583 (3.2)                         | 197 (33.8)                          | 16 (2.7)                          | 213 (36.5)                                              |
|                                         | Active Out                                                                                                                                          | 835                             | 33 (4.0)                          | 11 (33.3)                           | <10 <sup>6</sup>                  | 11 (33.3)                                               |
|                                         | Convicted Sentence                                                                                                                                  | 1,320                           | 38 (2.9)                          | 12 (31.6)                           | <10 <sup>6</sup>                  | 12 (31.6)                                               |
|                                         | Downgrade in security category                                                                                                                      | <10 <sup>6</sup>                | <10 <sup>6</sup>                  | <10 <sup>6</sup>                    | <10 <sup>6</sup>                  | <10 <sup>6</sup>                                        |
|                                         | Internal Cell Move                                                                                                                                  | <10 <sup>6</sup>                | <10 <sup>6</sup>                  | <10 <sup>6</sup>                    | <10 <sup>6</sup>                  | <10 <sup>6</sup>                                        |
|                                         | Judges Remand                                                                                                                                       | <10 <sup>6</sup>                | <10 <sup>6</sup>                  | <10 <sup>6</sup>                    | <10 <sup>6</sup>                  | <10 <sup>6</sup>                                        |
|                                         | Licence Revoke                                                                                                                                      | 125                             | <10 <sup>6</sup>                  | <10 <sup>6</sup>                    | <10 <sup>6</sup>                  | <10 <sup>6</sup>                                        |
|                                         | On Remand                                                                                                                                           | 1,059                           | 27 (2.5)                          | <10 <sup>6</sup>                    | <10 <sup>6</sup>                  | <10 <sup>6</sup>                                        |
|                                         | Transfer                                                                                                                                            | 518                             | 19 (3.7)                          | <10 <sup>6</sup>                    | <10 <sup>6</sup>                  | <10 <sup>6</sup>                                        |
|                                         | Upgrade in security category                                                                                                                        | <10 <sup>6</sup>                | <10 <sup>6</sup>                  | <10 <sup>6</sup>                    | <10 <sup>6</sup>                  | <10 <sup>6</sup>                                        |
| 2019/20                                 | .                                                                                                                                                   | 69                              | <10 <sup>6</sup>                  | <10 <sup>6</sup>                    | <10 <sup>6</sup>                  | <10 <sup>6</sup>                                        |
|                                         | Absconded                                                                                                                                           | <10 <sup>6</sup>                | <10 <sup>6</sup>                  | <10 <sup>6</sup>                    | <10 <sup>6</sup>                  | <10 <sup>6</sup>                                        |
|                                         | Active In                                                                                                                                           | 22,424                          | 664 (3.0)                         | 212 (31.9)                          | 18 (2.7)                          | 230 (34.6)                                              |
|                                         | Active Out                                                                                                                                          | 625                             | 25 (4.0)                          | <10 <sup>6</sup>                    | <10 <sup>6</sup>                  | <10 <sup>6</sup>                                        |
|                                         | Convicted Sentence                                                                                                                                  | 1,361                           | 33 (2.4)                          | 12 (36.4)                           | <10 <sup>6</sup>                  | 12 (36.4)                                               |
|                                         | Downgrade in security category                                                                                                                      | <10 <sup>6</sup>                | <10 <sup>6</sup>                  | <10 <sup>6</sup>                    | <10 <sup>6</sup>                  | <10 <sup>6</sup>                                        |
|                                         | Internal Cell Move                                                                                                                                  | <10 <sup>6</sup>                | <10 <sup>6</sup>                  | <10 <sup>6</sup>                    | <10 <sup>6</sup>                  | <10 <sup>6</sup>                                        |
|                                         | Judges Remand                                                                                                                                       | 19                              | <10 <sup>6</sup>                  | <10 <sup>6</sup>                    | <10 <sup>6</sup>                  | <10 <sup>6</sup>                                        |
|                                         | Licence Revoke                                                                                                                                      | 178                             | <10 <sup>6</sup>                  | <10 <sup>6</sup>                    | <10 <sup>6</sup>                  | <10 <sup>6</sup>                                        |
|                                         | On Remand                                                                                                                                           | 1,031                           | 23 (2.2)                          | 10 (43.5)                           | <10 <sup>6</sup>                  | 10 (43.5)                                               |
|                                         | Transfer                                                                                                                                            | 101                             | <10 <sup>6</sup>                  | <10 <sup>6</sup>                    | <10 <sup>6</sup>                  | <10 <sup>6</sup>                                        |
|                                         | Upgrade in security category                                                                                                                        | <10 <sup>6</sup>                | <10 <sup>6</sup>                  | <10 <sup>6</sup>                    | <10 <sup>6</sup>                  | <10 <sup>6</sup>                                        |
| <b>Age - years</b>                      |                                                                                                                                                     |                                 |                                   |                                     |                                   |                                                         |
| 2017/18                                 | 10 - <20                                                                                                                                            | 468                             | <10 <sup>6</sup>                  | <10 <sup>6</sup>                    | <10 <sup>6</sup>                  | <10 <sup>6</sup>                                        |
|                                         | 20 - <30                                                                                                                                            | 6,994                           | 38 (0.5)                          | <10 <sup>6</sup>                    | <10 <sup>6</sup>                  | <10 <sup>6</sup>                                        |
|                                         | 30 - <40                                                                                                                                            | 7,051                           | 77 (1.1)                          | 15 (19.5)                           | <10 <sup>6</sup>                  | 16 (20.8)                                               |
|                                         | 40 - <50                                                                                                                                            | 4,114                           | 150 (3.6)                         | 42 (28.0)                           | <10 <sup>6</sup>                  | 43 (28.7)                                               |
|                                         | 50 - <60                                                                                                                                            | 2,107                           | 217 (10.3)                        | 77 (35.5)                           | 11 (5.1)                          | 88 (40.6)                                               |
|                                         | 60 - <70                                                                                                                                            | 684                             | 123 (18.0)                        | 46 (37.4)                           | <10 <sup>6</sup>                  | 48 (39.0)                                               |
|                                         | 70 - <80                                                                                                                                            | 213                             | 48 (22.5)                         | 24 (50.0)                           | <10 <sup>6</sup>                  | 25 (52.1)                                               |
|                                         | 80 - <90                                                                                                                                            | 40                              | 10 (25.0)                         | <10 <sup>6</sup>                    | <10 <sup>6</sup>                  | <10 <sup>6</sup>                                        |
|                                         | 90 - <100                                                                                                                                           | <10 <sup>6</sup>                | <10 <sup>6</sup>                  | <10 <sup>6</sup>                    | <10 <sup>6</sup>                  | <10 <sup>6</sup>                                        |
|                                         | 100 - <110                                                                                                                                          | <10 <sup>6</sup>                | <10 <sup>6</sup>                  | <10 <sup>6</sup>                    | <10 <sup>6</sup>                  | <10 <sup>6</sup>                                        |
| 2018/19                                 | 10 - <20                                                                                                                                            | 436                             | <10 <sup>6</sup>                  | <10 <sup>6</sup>                    | <10 <sup>6</sup>                  | <10 <sup>6</sup>                                        |
|                                         | 20 - <30                                                                                                                                            | 7,163                           | 50 (0.7)                          | 10 (20.0)                           | <10 <sup>6</sup>                  | 10 (20.0)                                               |
|                                         | 30 - <40                                                                                                                                            | 7,381                           | 106 (1.4)                         | 22 (20.8)                           | <10 <sup>6</sup>                  | 27 (25.5)                                               |
|                                         | 40 - <50                                                                                                                                            | 4,180                           | 148 (3.5)                         | 41 (27.7)                           | <10 <sup>6</sup>                  | 42 (28.4)                                               |
|                                         | 50 - <60                                                                                                                                            | 1,978                           | 212 (10.7)                        | 78 (36.8)                           | <10 <sup>6</sup>                  | 83 (39.2)                                               |
|                                         | 60 - <70                                                                                                                                            | 701                             | 132 (18.8)                        | 53 (40.2)                           | <10 <sup>6</sup>                  | 57 (43.2)                                               |
|                                         | 70 - <80                                                                                                                                            | 209                             | 48 (23.0)                         | 23 (47.9)                           | <10 <sup>6</sup>                  | 25 (52.1)                                               |
|                                         | 80 - <90                                                                                                                                            | 45                              | <10 <sup>6</sup>                  | <10 <sup>6</sup>                    | <10 <sup>6</sup>                  | <10 <sup>6</sup>                                        |
|                                         | 90 - <100                                                                                                                                           | <10 <sup>6</sup>                | <10 <sup>6</sup>                  | <10 <sup>6</sup>                    | <10 <sup>6</sup>                  | <10 <sup>6</sup>                                        |
|                                         | 100 - <110                                                                                                                                          | <10 <sup>6</sup>                | <10 <sup>6</sup>                  | <10 <sup>6</sup>                    | <10 <sup>6</sup>                  | <10 <sup>6</sup>                                        |
| 2019/20                                 | 10 - <20                                                                                                                                            | 404                             | <10 <sup>6</sup>                  | <10 <sup>6</sup>                    | <10 <sup>6</sup>                  | <10 <sup>6</sup>                                        |
|                                         | 20 - <30                                                                                                                                            | 8,064                           | 60 (0.7)                          | <10 <sup>6</sup>                    | <10 <sup>6</sup>                  | <10 <sup>6</sup>                                        |
|                                         | 30 - <40                                                                                                                                            | 9,125                           | 100 (1.1)                         | 19 (19.0)                           | <10 <sup>6</sup>                  | 20 (20.0)                                               |
|                                         | 40 - <50                                                                                                                                            | 4,948                           | 194 (3.9)                         | 60 (30.9)                           | 10 (5.2)                          | 70 (36.1)                                               |
|                                         | 50 - <60                                                                                                                                            | 2,224                           | 192 (8.6)                         | 66 (34.4)                           | <10 <sup>6</sup>                  | 70 (36.5)                                               |
|                                         | 60 - <70                                                                                                                                            | 751                             | 148 (19.7)                        | 67 (45.3)                           | <10 <sup>6</sup>                  | 69 (46.6)                                               |
|                                         | 70 - <80                                                                                                                                            | 238                             | 53 (22.3)                         | 18 (34.0)                           | <10 <sup>6</sup>                  | 19 (35.8)                                               |
|                                         | 80 - <90                                                                                                                                            | 53                              | <10 <sup>6</sup>                  | <10 <sup>6</sup>                    | <10 <sup>6</sup>                  | <10 <sup>6</sup>                                        |
|                                         | 90 - <100                                                                                                                                           | <10 <sup>6</sup>                | <10 <sup>6</sup>                  | <10 <sup>6</sup>                    | <10 <sup>6</sup>                  | <10 <sup>6</sup>                                        |
|                                         | 100 - <110                                                                                                                                          | <10 <sup>6</sup>                | <10 <sup>6</sup>                  | <10 <sup>6</sup>                    | <10 <sup>6</sup>                  | <10 <sup>6</sup>                                        |

<sup>1</sup>Eligible for indicator; <sup>2</sup>Achieve in current prison; <sup>3</sup>Achieve in previous prison; <sup>4</sup>Overall achievement - either current or previous prison; <sup>5</sup>Declined indicator; <sup>6</sup>Suppressed (<10) to avoid disclosure

| Indicator                               | <i>The proportion of people with diabetes without moderate or severe frailty, in whom the last HbA1c is 58 mmol/mol or less in the preceding 12 months</i> |                                 |                                   |                                     |                                   | Community achievement<br>2019/20: 56.66% (QOF<br>19/20) |
|-----------------------------------------|------------------------------------------------------------------------------------------------------------------------------------------------------------|---------------------------------|-----------------------------------|-------------------------------------|-----------------------------------|---------------------------------------------------------|
| Group: Diabetes, Asthma & Epilepsy Care |                                                                                                                                                            |                                 |                                   |                                     |                                   |                                                         |
| Variable                                | Population                                                                                                                                                 | Eligible <sup>1</sup> (% popln) | Satisfy <sup>2</sup> (% eligible) | Elsewhere <sup>3</sup> (% eligible) | Achieve <sup>4</sup> (% eligible) |                                                         |
| <b>Length of Stay (months)</b>          |                                                                                                                                                            |                                 |                                   |                                     |                                   |                                                         |
| 2017/18                                 | <1                                                                                                                                                         | 4,474                           | 92 (2.1)                          | <10 <sup>6</sup>                    | <10 <sup>6</sup>                  | 10 (10.9)                                               |
|                                         | 1-<6                                                                                                                                                       | 8,075                           | 177 (2.2)                         | 26 (14.7)                           | <10 <sup>6</sup>                  | 30 (16.9)                                               |
|                                         | 6-<12                                                                                                                                                      | 3,672                           | 104 (2.8)                         | 49 (47.1)                           | <10 <sup>6</sup>                  | 52 (50.0)                                               |
|                                         | 12-<24                                                                                                                                                     | 2,832                           | 93 (3.3)                          | 41 (44.1)                           | <10 <sup>6</sup>                  | 42 (45.2)                                               |
|                                         | 24+                                                                                                                                                        | 2,624                           | 200 (7.6)                         | 94 (47.0)                           | <10 <sup>6</sup>                  | 97 (48.5)                                               |
| 2018/19                                 | <1                                                                                                                                                         | 4,801                           | 97 (2.0)                          | <10 <sup>6</sup>                    | <10 <sup>6</sup>                  | <10 <sup>6</sup>                                        |
|                                         | 1-<6                                                                                                                                                       | 7,742                           | 183 (2.4)                         | 40 (21.9)                           | <10 <sup>6</sup>                  | 48 (26.2)                                               |
|                                         | 6-<12                                                                                                                                                      | 3,616                           | 103 (2.8)                         | 42 (40.8)                           | <10 <sup>6</sup>                  | 42 (40.8)                                               |
|                                         | 12-<24                                                                                                                                                     | 3,447                           | 115 (3.3)                         | 50 (43.5)                           | <10 <sup>6</sup>                  | 57 (49.6)                                               |
|                                         | 24+                                                                                                                                                        | 2,493                           | 208 (8.3)                         | 99 (47.6)                           | <10 <sup>6</sup>                  | 99 (47.6)                                               |
| 2019/20                                 | <1                                                                                                                                                         | 5,745                           | 134 (2.3)                         | <10 <sup>6</sup>                    | <10 <sup>6</sup>                  | <10 <sup>6</sup>                                        |
|                                         | 1-<6                                                                                                                                                       | 9,697                           | 214 (2.2)                         | 57 (26.6)                           | <10 <sup>6</sup>                  | 65 (30.4)                                               |
|                                         | 6-<12                                                                                                                                                      | 5,090                           | 143 (2.8)                         | 66 (46.2)                           | <10 <sup>6</sup>                  | 72 (50.3)                                               |
|                                         | 12-<24                                                                                                                                                     | 3,244                           | 100 (3.1)                         | 45 (45.0)                           | <10 <sup>6</sup>                  | 46 (46.0)                                               |
|                                         | 24+                                                                                                                                                        | 2,035                           | 165 (8.1)                         | 73 (44.2)                           | <10 <sup>6</sup>                  | 73 (44.2)                                               |
| <b>Ethnic Group</b>                     |                                                                                                                                                            |                                 |                                   |                                     |                                   |                                                         |
| 2017/18                                 | White                                                                                                                                                      | 15,638                          | 518 (3.3)                         | 167 (32.2)                          | 12 (2.3)                          | 179 (34.6)                                              |
|                                         | Mixed                                                                                                                                                      | 431                             | 14 (3.2)                          | <10 <sup>6</sup>                    | <10 <sup>6</sup>                  | <10 <sup>6</sup>                                        |
|                                         | Asian or Asian British                                                                                                                                     | 813                             | 32 (3.9)                          | 11 (34.4)                           | <10 <sup>6</sup>                  | 14 (43.8)                                               |
|                                         | Black or Black British                                                                                                                                     | 404                             | 13 (3.2)                          | <10 <sup>6</sup>                    | <10 <sup>6</sup>                  | 10 (76.9)                                               |
|                                         | Chinese and Other                                                                                                                                          | 214                             | 10 (4.7)                          | <10 <sup>6</sup>                    | <10 <sup>6</sup>                  | <10 <sup>6</sup>                                        |
|                                         | Unclassified                                                                                                                                               | 372                             | 14 (3.8)                          | <10 <sup>6</sup>                    | <10 <sup>6</sup>                  | <10 <sup>6</sup>                                        |
| 2018/19                                 | White                                                                                                                                                      | 14,911                          | 503 (3.4)                         | 162 (32.2)                          | 13 (2.6)                          | 175 (34.8)                                              |
|                                         | Mixed                                                                                                                                                      | 371                             | 10 (2.7)                          | <10 <sup>6</sup>                    | <10 <sup>6</sup>                  | <10 <sup>6</sup>                                        |
|                                         | Asian or Asian British                                                                                                                                     | 726                             | 30 (4.1)                          | 11 (36.7)                           | <10 <sup>6</sup>                  | 11 (36.7)                                               |
|                                         | Black or Black British                                                                                                                                     | 364                             | 16 (4.4)                          | <10 <sup>6</sup>                    | <10 <sup>6</sup>                  | <10 <sup>6</sup>                                        |
|                                         | Chinese and Other                                                                                                                                          | 167                             | <10 <sup>6</sup>                  | <10 <sup>6</sup>                    | <10 <sup>6</sup>                  | <10 <sup>6</sup>                                        |
|                                         | Unclassified                                                                                                                                               | 409                             | <10 <sup>6</sup>                  | <10 <sup>6</sup>                    | <10 <sup>6</sup>                  | <10 <sup>6</sup>                                        |
| 2019/20                                 | White                                                                                                                                                      | 16,606                          | 486 (2.9)                         | 168 (34.6)                          | 10 (2.1)                          | 178 (36.6)                                              |
|                                         | Mixed                                                                                                                                                      | 409                             | 11 (2.7)                          | <10 <sup>6</sup>                    | <10 <sup>6</sup>                  | <10 <sup>6</sup>                                        |
|                                         | Asian or Asian British                                                                                                                                     | 755                             | 45 (6.0)                          | 16 (35.6)                           | <10 <sup>6</sup>                  | 18 (40.0)                                               |
|                                         | Black or Black British                                                                                                                                     | 451                             | 21 (4.7)                          | 10 (47.6)                           | <10 <sup>6</sup>                  | 10 (47.6)                                               |
|                                         | Chinese and Other                                                                                                                                          | 163                             | <10 <sup>6</sup>                  | <10 <sup>6</sup>                    | <10 <sup>6</sup>                  | <10 <sup>6</sup>                                        |
|                                         | Unclassified                                                                                                                                               | 387                             | <10 <sup>6</sup>                  | <10 <sup>6</sup>                    | <10 <sup>6</sup>                  | <10 <sup>6</sup>                                        |

<sup>1</sup>Eligible for indicator; <sup>2</sup>Achieve in current prison; <sup>3</sup>Achieve in previous prison; <sup>4</sup>Overall achievement - either current or previous prison; <sup>5</sup>Declined indicator; <sup>6</sup>Suppressed (<10) to avoid disclosure



| Indicator                               | The proportion of people with diabetes and moderate or severe frailty, in whom the last HbA1c is 75 mmol/mol or less in the preceding 12 months |                                 |                                   |                                     |                                   | Community achievement<br>2019/20: 83.34% (QOF<br>19/20) |
|-----------------------------------------|-------------------------------------------------------------------------------------------------------------------------------------------------|---------------------------------|-----------------------------------|-------------------------------------|-----------------------------------|---------------------------------------------------------|
| Group: Diabetes, Asthma & Epilepsy Care |                                                                                                                                                 |                                 |                                   |                                     |                                   |                                                         |
| Variable                                | Population                                                                                                                                      | Eligible <sup>1</sup> (% popln) | Satisfy <sup>2</sup> (% eligible) | Elsewhere <sup>3</sup> (% eligible) | Achieve <sup>4</sup> (% eligible) |                                                         |
| <b>Year</b>                             |                                                                                                                                                 |                                 |                                   |                                     |                                   |                                                         |
| 2017/18                                 | 21,677                                                                                                                                          | <10 <sup>6</sup>                | <10 <sup>6</sup>                  | <10 <sup>6</sup>                    | <10 <sup>6</sup>                  | <10 <sup>6</sup>                                        |
| 2018/19                                 | 22,099                                                                                                                                          | <10 <sup>6</sup>                | <10 <sup>6</sup>                  | <10 <sup>6</sup>                    | <10 <sup>6</sup>                  | <10 <sup>6</sup>                                        |
| 2019/20                                 | 25,811                                                                                                                                          | 14 (0.1)                        | <10 <sup>6</sup>                  | <10 <sup>6</sup>                    | <10 <sup>6</sup>                  | <10 <sup>6</sup>                                        |
| <b>Prison</b>                           |                                                                                                                                                 |                                 |                                   |                                     |                                   |                                                         |
| 2017/18                                 |                                                                                                                                                 |                                 |                                   |                                     |                                   |                                                         |
| Prison 1                                | 1,323                                                                                                                                           | <10 <sup>6</sup>                | <10 <sup>6</sup>                  | <10 <sup>6</sup>                    | <10 <sup>6</sup>                  | <10 <sup>6</sup>                                        |
| Prison 2                                | 3,261                                                                                                                                           | <10 <sup>6</sup>                | <10 <sup>6</sup>                  | <10 <sup>6</sup>                    | <10 <sup>6</sup>                  | <10 <sup>6</sup>                                        |
| Prison 3                                | 2,623                                                                                                                                           | <10 <sup>6</sup>                | <10 <sup>6</sup>                  | <10 <sup>6</sup>                    | <10 <sup>6</sup>                  | <10 <sup>6</sup>                                        |
| Prison 4                                | 2,089                                                                                                                                           | <10 <sup>6</sup>                | <10 <sup>6</sup>                  | <10 <sup>6</sup>                    | <10 <sup>6</sup>                  | <10 <sup>6</sup>                                        |
| Prison 5                                | 637                                                                                                                                             | <10 <sup>6</sup>                | <10 <sup>6</sup>                  | <10 <sup>6</sup>                    | <10 <sup>6</sup>                  | <10 <sup>6</sup>                                        |
| Prison 6                                | 1,552                                                                                                                                           | <10 <sup>6</sup>                | <10 <sup>6</sup>                  | <10 <sup>6</sup>                    | <10 <sup>6</sup>                  | <10 <sup>6</sup>                                        |
| Prison 7                                | 635                                                                                                                                             | <10 <sup>6</sup>                | <10 <sup>6</sup>                  | <10 <sup>6</sup>                    | <10 <sup>6</sup>                  | <10 <sup>6</sup>                                        |
| Prison 8                                | 1,085                                                                                                                                           | <10 <sup>6</sup>                | <10 <sup>6</sup>                  | <10 <sup>6</sup>                    | <10 <sup>6</sup>                  | <10 <sup>6</sup>                                        |
| Prison 9                                | 981                                                                                                                                             | <10 <sup>6</sup>                | <10 <sup>6</sup>                  | <10 <sup>6</sup>                    | <10 <sup>6</sup>                  | <10 <sup>6</sup>                                        |
| Prison 10                               | 2,523                                                                                                                                           | <10 <sup>6</sup>                | <10 <sup>6</sup>                  | <10 <sup>6</sup>                    | <10 <sup>6</sup>                  | <10 <sup>6</sup>                                        |
| Prison 11                               | 3,470                                                                                                                                           | <10 <sup>6</sup>                | <10 <sup>6</sup>                  | <10 <sup>6</sup>                    | <10 <sup>6</sup>                  | <10 <sup>6</sup>                                        |
| Prison 12                               | 815                                                                                                                                             | <10 <sup>6</sup>                | <10 <sup>6</sup>                  | <10 <sup>6</sup>                    | <10 <sup>6</sup>                  | <10 <sup>6</sup>                                        |
| Prison 13                               | 683                                                                                                                                             | <10 <sup>6</sup>                | <10 <sup>6</sup>                  | <10 <sup>6</sup>                    | <10 <sup>6</sup>                  | <10 <sup>6</sup>                                        |
| 2018/19                                 |                                                                                                                                                 |                                 |                                   |                                     |                                   |                                                         |
| Prison 1                                | 1,333                                                                                                                                           | <10 <sup>6</sup>                | <10 <sup>6</sup>                  | <10 <sup>6</sup>                    | <10 <sup>6</sup>                  | <10 <sup>6</sup>                                        |
| Prison 2                                | 2,705                                                                                                                                           | <10 <sup>6</sup>                | <10 <sup>6</sup>                  | <10 <sup>6</sup>                    | <10 <sup>6</sup>                  | <10 <sup>6</sup>                                        |
| Prison 3                                | 2,522                                                                                                                                           | <10 <sup>6</sup>                | <10 <sup>6</sup>                  | <10 <sup>6</sup>                    | <10 <sup>6</sup>                  | <10 <sup>6</sup>                                        |
| Prison 4                                | 2,349                                                                                                                                           | <10 <sup>6</sup>                | <10 <sup>6</sup>                  | <10 <sup>6</sup>                    | <10 <sup>6</sup>                  | <10 <sup>6</sup>                                        |
| Prison 5                                | 676                                                                                                                                             | <10 <sup>6</sup>                | <10 <sup>6</sup>                  | <10 <sup>6</sup>                    | <10 <sup>6</sup>                  | <10 <sup>6</sup>                                        |
| Prison 6                                | 1,513                                                                                                                                           | <10 <sup>6</sup>                | <10 <sup>6</sup>                  | <10 <sup>6</sup>                    | <10 <sup>6</sup>                  | <10 <sup>6</sup>                                        |
| Prison 7                                | 654                                                                                                                                             | <10 <sup>6</sup>                | <10 <sup>6</sup>                  | <10 <sup>6</sup>                    | <10 <sup>6</sup>                  | <10 <sup>6</sup>                                        |
| Prison 8                                | 1,148                                                                                                                                           | <10 <sup>6</sup>                | <10 <sup>6</sup>                  | <10 <sup>6</sup>                    | <10 <sup>6</sup>                  | <10 <sup>6</sup>                                        |
| Prison 9                                | 996                                                                                                                                             | <10 <sup>6</sup>                | <10 <sup>6</sup>                  | <10 <sup>6</sup>                    | <10 <sup>6</sup>                  | <10 <sup>6</sup>                                        |
| Prison 10                               | 2,717                                                                                                                                           | <10 <sup>6</sup>                | <10 <sup>6</sup>                  | <10 <sup>6</sup>                    | <10 <sup>6</sup>                  | <10 <sup>6</sup>                                        |
| Prison 11                               | 4,020                                                                                                                                           | <10 <sup>6</sup>                | <10 <sup>6</sup>                  | <10 <sup>6</sup>                    | <10 <sup>6</sup>                  | <10 <sup>6</sup>                                        |
| Prison 12                               | 792                                                                                                                                             | <10 <sup>6</sup>                | <10 <sup>6</sup>                  | <10 <sup>6</sup>                    | <10 <sup>6</sup>                  | <10 <sup>6</sup>                                        |
| Prison 13                               | 674                                                                                                                                             | <10 <sup>6</sup>                | <10 <sup>6</sup>                  | <10 <sup>6</sup>                    | <10 <sup>6</sup>                  | <10 <sup>6</sup>                                        |
| 2019/20                                 |                                                                                                                                                 |                                 |                                   |                                     |                                   |                                                         |
| Prison 1                                | 1,410                                                                                                                                           | <10 <sup>6</sup>                | <10 <sup>6</sup>                  | <10 <sup>6</sup>                    | <10 <sup>6</sup>                  | <10 <sup>6</sup>                                        |
| Prison 2                                | 2,979                                                                                                                                           | <10 <sup>6</sup>                | <10 <sup>6</sup>                  | <10 <sup>6</sup>                    | <10 <sup>6</sup>                  | <10 <sup>6</sup>                                        |
| Prison 3                                | 2,809                                                                                                                                           | <10 <sup>6</sup>                | <10 <sup>6</sup>                  | <10 <sup>6</sup>                    | <10 <sup>6</sup>                  | <10 <sup>6</sup>                                        |
| Prison 4                                | 2,651                                                                                                                                           | <10 <sup>6</sup>                | <10 <sup>6</sup>                  | <10 <sup>6</sup>                    | <10 <sup>6</sup>                  | <10 <sup>6</sup>                                        |
| Prison 5                                | 616                                                                                                                                             | <10 <sup>6</sup>                | <10 <sup>6</sup>                  | <10 <sup>6</sup>                    | <10 <sup>6</sup>                  | <10 <sup>6</sup>                                        |
| Prison 6                                | 1,533                                                                                                                                           | <10 <sup>6</sup>                | <10 <sup>6</sup>                  | <10 <sup>6</sup>                    | <10 <sup>6</sup>                  | <10 <sup>6</sup>                                        |
| Prison 7                                | 860                                                                                                                                             | <10 <sup>6</sup>                | <10 <sup>6</sup>                  | <10 <sup>6</sup>                    | <10 <sup>6</sup>                  | <10 <sup>6</sup>                                        |
| Prison 8                                | 1,385                                                                                                                                           | <10 <sup>6</sup>                | <10 <sup>6</sup>                  | <10 <sup>6</sup>                    | <10 <sup>6</sup>                  | <10 <sup>6</sup>                                        |
| Prison 9                                | 1,092                                                                                                                                           | <10 <sup>6</sup>                | <10 <sup>6</sup>                  | <10 <sup>6</sup>                    | <10 <sup>6</sup>                  | <10 <sup>6</sup>                                        |
| Prison 10                               | 3,577                                                                                                                                           | <10 <sup>6</sup>                | <10 <sup>6</sup>                  | <10 <sup>6</sup>                    | <10 <sup>6</sup>                  | <10 <sup>6</sup>                                        |
| Prison 11                               | 5,348                                                                                                                                           | <10 <sup>6</sup>                | <10 <sup>6</sup>                  | <10 <sup>6</sup>                    | <10 <sup>6</sup>                  | <10 <sup>6</sup>                                        |
| Prison 12                               | 805                                                                                                                                             | <10 <sup>6</sup>                | <10 <sup>6</sup>                  | <10 <sup>6</sup>                    | <10 <sup>6</sup>                  | <10 <sup>6</sup>                                        |
| Prison 13                               | 746                                                                                                                                             | <10 <sup>6</sup>                | <10 <sup>6</sup>                  | <10 <sup>6</sup>                    | <10 <sup>6</sup>                  | <10 <sup>6</sup>                                        |
| <b>Prison category</b>                  |                                                                                                                                                 |                                 |                                   |                                     |                                   |                                                         |
| 2017/18                                 |                                                                                                                                                 |                                 |                                   |                                     |                                   |                                                         |
| A                                       | 1,664                                                                                                                                           | <10 <sup>6</sup>                | <10 <sup>6</sup>                  | <10 <sup>6</sup>                    | <10 <sup>6</sup>                  | <10 <sup>6</sup>                                        |
| B                                       | 9,254                                                                                                                                           | <10 <sup>6</sup>                | <10 <sup>6</sup>                  | <10 <sup>6</sup>                    | <10 <sup>6</sup>                  | <10 <sup>6</sup>                                        |
| C                                       | 6,035                                                                                                                                           | <10 <sup>6</sup>                | <10 <sup>6</sup>                  | <10 <sup>6</sup>                    | <10 <sup>6</sup>                  | <10 <sup>6</sup>                                        |
| Closed                                  | 1,720                                                                                                                                           | <10 <sup>6</sup>                | <10 <sup>6</sup>                  | <10 <sup>6</sup>                    | <10 <sup>6</sup>                  | <10 <sup>6</sup>                                        |
| D                                       | 2,189                                                                                                                                           | <10 <sup>6</sup>                | <10 <sup>6</sup>                  | <10 <sup>6</sup>                    | <10 <sup>6</sup>                  | <10 <sup>6</sup>                                        |
| YOI                                     | 815                                                                                                                                             | <10 <sup>6</sup>                | <10 <sup>6</sup>                  | <10 <sup>6</sup>                    | <10 <sup>6</sup>                  | <10 <sup>6</sup>                                        |
| 2018/19                                 |                                                                                                                                                 |                                 |                                   |                                     |                                   |                                                         |
| A                                       | 1,670                                                                                                                                           | <10 <sup>6</sup>                | <10 <sup>6</sup>                  | <10 <sup>6</sup>                    | <10 <sup>6</sup>                  | <10 <sup>6</sup>                                        |
| B                                       | 9,442                                                                                                                                           | <10 <sup>6</sup>                | <10 <sup>6</sup>                  | <10 <sup>6</sup>                    | <10 <sup>6</sup>                  | <10 <sup>6</sup>                                        |
| C                                       | 6,204                                                                                                                                           | <10 <sup>6</sup>                | <10 <sup>6</sup>                  | <10 <sup>6</sup>                    | <10 <sup>6</sup>                  | <10 <sup>6</sup>                                        |
| Closed                                  | 1,802                                                                                                                                           | <10 <sup>6</sup>                | <10 <sup>6</sup>                  | <10 <sup>6</sup>                    | <10 <sup>6</sup>                  | <10 <sup>6</sup>                                        |
| D                                       | 2,189                                                                                                                                           | <10 <sup>6</sup>                | <10 <sup>6</sup>                  | <10 <sup>6</sup>                    | <10 <sup>6</sup>                  | <10 <sup>6</sup>                                        |
| YOI                                     | 792                                                                                                                                             | <10 <sup>6</sup>                | <10 <sup>6</sup>                  | <10 <sup>6</sup>                    | <10 <sup>6</sup>                  | <10 <sup>6</sup>                                        |
| 2019/20                                 |                                                                                                                                                 |                                 |                                   |                                     |                                   |                                                         |
| A                                       | 1,838                                                                                                                                           | <10 <sup>6</sup>                | <10 <sup>6</sup>                  | <10 <sup>6</sup>                    | <10 <sup>6</sup>                  | <10 <sup>6</sup>                                        |
| B                                       | 11,904                                                                                                                                          | <10 <sup>6</sup>                | <10 <sup>6</sup>                  | <10 <sup>6</sup>                    | <10 <sup>6</sup>                  | <10 <sup>6</sup>                                        |
| C                                       | 6,870                                                                                                                                           | <10 <sup>6</sup>                | <10 <sup>6</sup>                  | <10 <sup>6</sup>                    | <10 <sup>6</sup>                  | <10 <sup>6</sup>                                        |
| Closed                                  | 2,245                                                                                                                                           | <10 <sup>6</sup>                | <10 <sup>6</sup>                  | <10 <sup>6</sup>                    | <10 <sup>6</sup>                  | <10 <sup>6</sup>                                        |
| D                                       | 2,149                                                                                                                                           | <10 <sup>6</sup>                | <10 <sup>6</sup>                  | <10 <sup>6</sup>                    | <10 <sup>6</sup>                  | <10 <sup>6</sup>                                        |
| YOI                                     | 805                                                                                                                                             | <10 <sup>6</sup>                | <10 <sup>6</sup>                  | <10 <sup>6</sup>                    | <10 <sup>6</sup>                  | <10 <sup>6</sup>                                        |
| <b>Gender</b>                           |                                                                                                                                                 |                                 |                                   |                                     |                                   |                                                         |
| 2017/18                                 |                                                                                                                                                 |                                 |                                   |                                     |                                   |                                                         |
| F                                       | 1,699                                                                                                                                           | <10 <sup>6</sup>                | <10 <sup>6</sup>                  | <10 <sup>6</sup>                    | <10 <sup>6</sup>                  | <10 <sup>6</sup>                                        |
| M                                       | 19,977                                                                                                                                          | <10 <sup>6</sup>                | <10 <sup>6</sup>                  | <10 <sup>6</sup>                    | <10 <sup>6</sup>                  | <10 <sup>6</sup>                                        |
| 2018/19                                 |                                                                                                                                                 |                                 |                                   |                                     |                                   |                                                         |
| F                                       | 1,802                                                                                                                                           | <10 <sup>6</sup>                | <10 <sup>6</sup>                  | <10 <sup>6</sup>                    | <10 <sup>6</sup>                  | <10 <sup>6</sup>                                        |
| M                                       | 20,295                                                                                                                                          | <10 <sup>6</sup>                | <10 <sup>6</sup>                  | <10 <sup>6</sup>                    | <10 <sup>6</sup>                  | <10 <sup>6</sup>                                        |
| 2019/20                                 |                                                                                                                                                 |                                 |                                   |                                     |                                   |                                                         |
| F                                       | 1,376                                                                                                                                           | <10 <sup>6</sup>                | <10 <sup>6</sup>                  | <10 <sup>6</sup>                    | <10 <sup>6</sup>                  | <10 <sup>6</sup>                                        |
| M                                       | 23,570                                                                                                                                          | 14 (0.1)                        | <10 <sup>6</sup>                  | <10 <sup>6</sup>                    | <10 <sup>6</sup>                  | <10 <sup>6</sup>                                        |

<sup>1</sup>Eligible for indicator; <sup>2</sup>Achieve in current prison; <sup>3</sup>Achieve in previous prison; <sup>4</sup>Overall achievement - either current or previous prison; <sup>5</sup>Declined indicator; <sup>6</sup>Suppressed (<10) to avoid disclosure

| Indicator              | The proportion of people with diabetes and moderate or severe frailty, in whom the last HbA1c is 75 mmol/mol or less in the preceding 12 months |                                 |                                   |                                     |                                   | Community achievement<br>2019/20: 83.34% (QOF<br>19/20) |
|------------------------|-------------------------------------------------------------------------------------------------------------------------------------------------|---------------------------------|-----------------------------------|-------------------------------------|-----------------------------------|---------------------------------------------------------|
| Variable               | Population                                                                                                                                      | Eligible <sup>1</sup> (% popln) | Satisfy <sup>2</sup> (% eligible) | Elsewhere <sup>3</sup> (% eligible) | Achieve <sup>4</sup> (% eligible) |                                                         |
| <b>Sentence Status</b> |                                                                                                                                                 |                                 |                                   |                                     |                                   |                                                         |
| 2017/18                | .                                                                                                                                               | 81                              | <10 <sup>6</sup>                  | <10 <sup>6</sup>                    | <10 <sup>6</sup>                  | <10 <sup>6</sup>                                        |
|                        | Absconded                                                                                                                                       | <10 <sup>u</sup>                | <10 <sup>6</sup>                  | <10 <sup>6</sup>                    | <10 <sup>6</sup>                  | <10 <sup>6</sup>                                        |
|                        | Active In                                                                                                                                       | 15,872                          | <10 <sup>6</sup>                  | <10 <sup>6</sup>                    | <10 <sup>6</sup>                  | <10 <sup>6</sup>                                        |
|                        | Active Out                                                                                                                                      | 1,052                           | <10 <sup>6</sup>                  | <10 <sup>6</sup>                    | <10 <sup>6</sup>                  | <10 <sup>6</sup>                                        |
|                        | Convicted Sentence                                                                                                                              | 2,125                           | <10 <sup>6</sup>                  | <10 <sup>6</sup>                    | <10 <sup>6</sup>                  | <10 <sup>6</sup>                                        |
|                        | Downgrade in security category                                                                                                                  | <10 <sup>u</sup>                | <10 <sup>6</sup>                  | <10 <sup>6</sup>                    | <10 <sup>6</sup>                  | <10 <sup>6</sup>                                        |
|                        | Internal Cell Move                                                                                                                              | <10 <sup>u</sup>                | <10 <sup>6</sup>                  | <10 <sup>6</sup>                    | <10 <sup>6</sup>                  | <10 <sup>6</sup>                                        |
|                        | Judges Remand                                                                                                                                   | 92                              | <10 <sup>6</sup>                  | <10 <sup>6</sup>                    | <10 <sup>6</sup>                  | <10 <sup>6</sup>                                        |
|                        | Licence Revoke                                                                                                                                  | 52                              | <10 <sup>6</sup>                  | <10 <sup>6</sup>                    | <10 <sup>6</sup>                  | <10 <sup>6</sup>                                        |
|                        | On Remand                                                                                                                                       | 1,492                           | <10 <sup>6</sup>                  | <10 <sup>6</sup>                    | <10 <sup>6</sup>                  | <10 <sup>6</sup>                                        |
|                        | Transfer                                                                                                                                        | 910                             | <10 <sup>6</sup>                  | <10 <sup>6</sup>                    | <10 <sup>6</sup>                  | <10 <sup>6</sup>                                        |
|                        | Upgrade in security category                                                                                                                    | <10 <sup>u</sup>                | <10 <sup>6</sup>                  | <10 <sup>6</sup>                    | <10 <sup>6</sup>                  | <10 <sup>6</sup>                                        |
| 2018/19                | .                                                                                                                                               | 88                              | <10 <sup>6</sup>                  | <10 <sup>6</sup>                    | <10 <sup>6</sup>                  | <10 <sup>6</sup>                                        |
|                        | Absconded                                                                                                                                       | <10 <sup>u</sup>                | <10 <sup>6</sup>                  | <10 <sup>6</sup>                    | <10 <sup>6</sup>                  | <10 <sup>6</sup>                                        |
|                        | Active In                                                                                                                                       | 18,145                          | <10 <sup>6</sup>                  | <10 <sup>6</sup>                    | <10 <sup>6</sup>                  | <10 <sup>6</sup>                                        |
|                        | Active Out                                                                                                                                      | 835                             | <10 <sup>6</sup>                  | <10 <sup>6</sup>                    | <10 <sup>6</sup>                  | <10 <sup>6</sup>                                        |
|                        | Convicted Sentence                                                                                                                              | 1,320                           | <10 <sup>6</sup>                  | <10 <sup>6</sup>                    | <10 <sup>6</sup>                  | <10 <sup>6</sup>                                        |
|                        | Downgrade in security category                                                                                                                  | <10 <sup>u</sup>                | <10 <sup>6</sup>                  | <10 <sup>6</sup>                    | <10 <sup>6</sup>                  | <10 <sup>6</sup>                                        |
|                        | Internal Cell Move                                                                                                                              | <10 <sup>u</sup>                | <10 <sup>6</sup>                  | <10 <sup>6</sup>                    | <10 <sup>6</sup>                  | <10 <sup>6</sup>                                        |
|                        | Judges Remand                                                                                                                                   | <10 <sup>u</sup>                | <10 <sup>6</sup>                  | <10 <sup>6</sup>                    | <10 <sup>6</sup>                  | <10 <sup>6</sup>                                        |
|                        | Licence Revoke                                                                                                                                  | 125                             | <10 <sup>6</sup>                  | <10 <sup>6</sup>                    | <10 <sup>6</sup>                  | <10 <sup>6</sup>                                        |
|                        | On Remand                                                                                                                                       | 1,059                           | <10 <sup>6</sup>                  | <10 <sup>6</sup>                    | <10 <sup>6</sup>                  | <10 <sup>6</sup>                                        |
|                        | Transfer                                                                                                                                        | 518                             | <10 <sup>6</sup>                  | <10 <sup>6</sup>                    | <10 <sup>6</sup>                  | <10 <sup>6</sup>                                        |
|                        | Upgrade in security category                                                                                                                    | <10 <sup>u</sup>                | <10 <sup>6</sup>                  | <10 <sup>6</sup>                    | <10 <sup>6</sup>                  | <10 <sup>6</sup>                                        |
| 2019/20                | .                                                                                                                                               | 69                              | <10 <sup>6</sup>                  | <10 <sup>6</sup>                    | <10 <sup>6</sup>                  | <10 <sup>6</sup>                                        |
|                        | Absconded                                                                                                                                       | <10 <sup>u</sup>                | <10 <sup>6</sup>                  | <10 <sup>6</sup>                    | <10 <sup>6</sup>                  | <10 <sup>6</sup>                                        |
|                        | Active In                                                                                                                                       | 22,424                          | <10 <sup>6</sup>                  | <10 <sup>6</sup>                    | <10 <sup>6</sup>                  | <10 <sup>6</sup>                                        |
|                        | Active Out                                                                                                                                      | 625                             | <10 <sup>6</sup>                  | <10 <sup>6</sup>                    | <10 <sup>6</sup>                  | <10 <sup>6</sup>                                        |
|                        | Convicted Sentence                                                                                                                              | 1,361                           | <10 <sup>6</sup>                  | <10 <sup>6</sup>                    | <10 <sup>6</sup>                  | <10 <sup>6</sup>                                        |
|                        | Downgrade in security category                                                                                                                  | <10 <sup>u</sup>                | <10 <sup>6</sup>                  | <10 <sup>6</sup>                    | <10 <sup>6</sup>                  | <10 <sup>6</sup>                                        |
|                        | Internal Cell Move                                                                                                                              | <10 <sup>u</sup>                | <10 <sup>6</sup>                  | <10 <sup>6</sup>                    | <10 <sup>6</sup>                  | <10 <sup>6</sup>                                        |
|                        | Judges Remand                                                                                                                                   | 19                              | <10 <sup>6</sup>                  | <10 <sup>6</sup>                    | <10 <sup>6</sup>                  | <10 <sup>6</sup>                                        |
|                        | Licence Revoke                                                                                                                                  | 178                             | <10 <sup>6</sup>                  | <10 <sup>6</sup>                    | <10 <sup>6</sup>                  | <10 <sup>6</sup>                                        |
|                        | On Remand                                                                                                                                       | 1,031                           | <10 <sup>6</sup>                  | <10 <sup>6</sup>                    | <10 <sup>6</sup>                  | <10 <sup>6</sup>                                        |
|                        | Transfer                                                                                                                                        | 101                             | <10 <sup>6</sup>                  | <10 <sup>6</sup>                    | <10 <sup>6</sup>                  | <10 <sup>6</sup>                                        |
|                        | Upgrade in security category                                                                                                                    | <10 <sup>u</sup>                | <10 <sup>6</sup>                  | <10 <sup>6</sup>                    | <10 <sup>6</sup>                  | <10 <sup>6</sup>                                        |
| <b>Age - years</b>     |                                                                                                                                                 |                                 |                                   |                                     |                                   |                                                         |
| 2017/18                | 10 - <20                                                                                                                                        | 468                             | <10 <sup>6</sup>                  | <10 <sup>6</sup>                    | <10 <sup>6</sup>                  | <10 <sup>6</sup>                                        |
|                        | 20 - <30                                                                                                                                        | 6,994                           | <10 <sup>6</sup>                  | <10 <sup>6</sup>                    | <10 <sup>6</sup>                  | <10 <sup>6</sup>                                        |
|                        | 30 - <40                                                                                                                                        | 7,051                           | <10 <sup>6</sup>                  | <10 <sup>6</sup>                    | <10 <sup>6</sup>                  | <10 <sup>6</sup>                                        |
|                        | 40 - <50                                                                                                                                        | 4,114                           | <10 <sup>6</sup>                  | <10 <sup>6</sup>                    | <10 <sup>6</sup>                  | <10 <sup>6</sup>                                        |
|                        | 50 - <60                                                                                                                                        | 2,107                           | <10 <sup>6</sup>                  | <10 <sup>6</sup>                    | <10 <sup>6</sup>                  | <10 <sup>6</sup>                                        |
|                        | 60 - <70                                                                                                                                        | 684                             | <10 <sup>6</sup>                  | <10 <sup>6</sup>                    | <10 <sup>6</sup>                  | <10 <sup>6</sup>                                        |
|                        | 70 - <80                                                                                                                                        | 213                             | <10 <sup>6</sup>                  | <10 <sup>6</sup>                    | <10 <sup>6</sup>                  | <10 <sup>6</sup>                                        |
|                        | 80 - <90                                                                                                                                        | 40                              | <10 <sup>6</sup>                  | <10 <sup>6</sup>                    | <10 <sup>6</sup>                  | <10 <sup>6</sup>                                        |
|                        | 90 - <100                                                                                                                                       | <10 <sup>u</sup>                | <10 <sup>6</sup>                  | <10 <sup>6</sup>                    | <10 <sup>6</sup>                  | <10 <sup>6</sup>                                        |
|                        | 100 - <110                                                                                                                                      | <10 <sup>u</sup>                | <10 <sup>6</sup>                  | <10 <sup>6</sup>                    | <10 <sup>6</sup>                  | <10 <sup>6</sup>                                        |
| 2018/19                | 10 - <20                                                                                                                                        | 436                             | <10 <sup>6</sup>                  | <10 <sup>6</sup>                    | <10 <sup>6</sup>                  | <10 <sup>6</sup>                                        |
|                        | 20 - <30                                                                                                                                        | 7,163                           | <10 <sup>6</sup>                  | <10 <sup>6</sup>                    | <10 <sup>6</sup>                  | <10 <sup>6</sup>                                        |
|                        | 30 - <40                                                                                                                                        | 7,381                           | <10 <sup>6</sup>                  | <10 <sup>6</sup>                    | <10 <sup>6</sup>                  | <10 <sup>6</sup>                                        |
|                        | 40 - <50                                                                                                                                        | 4,180                           | <10 <sup>6</sup>                  | <10 <sup>6</sup>                    | <10 <sup>6</sup>                  | <10 <sup>6</sup>                                        |
|                        | 50 - <60                                                                                                                                        | 1,978                           | <10 <sup>6</sup>                  | <10 <sup>6</sup>                    | <10 <sup>6</sup>                  | <10 <sup>6</sup>                                        |
|                        | 60 - <70                                                                                                                                        | 701                             | <10 <sup>6</sup>                  | <10 <sup>6</sup>                    | <10 <sup>6</sup>                  | <10 <sup>6</sup>                                        |
|                        | 70 - <80                                                                                                                                        | 209                             | <10 <sup>6</sup>                  | <10 <sup>6</sup>                    | <10 <sup>6</sup>                  | <10 <sup>6</sup>                                        |
|                        | 80 - <90                                                                                                                                        | 45                              | <10 <sup>6</sup>                  | <10 <sup>6</sup>                    | <10 <sup>6</sup>                  | <10 <sup>6</sup>                                        |
|                        | 90 - <100                                                                                                                                       | <10 <sup>u</sup>                | <10 <sup>6</sup>                  | <10 <sup>6</sup>                    | <10 <sup>6</sup>                  | <10 <sup>6</sup>                                        |
|                        | 100 - <110                                                                                                                                      | <10 <sup>u</sup>                | <10 <sup>6</sup>                  | <10 <sup>6</sup>                    | <10 <sup>6</sup>                  | <10 <sup>6</sup>                                        |
| 2019/20                | 10 - <20                                                                                                                                        | 404                             | <10 <sup>6</sup>                  | <10 <sup>6</sup>                    | <10 <sup>6</sup>                  | <10 <sup>6</sup>                                        |
|                        | 20 - <30                                                                                                                                        | 8,064                           | <10 <sup>6</sup>                  | <10 <sup>6</sup>                    | <10 <sup>6</sup>                  | <10 <sup>6</sup>                                        |
|                        | 30 - <40                                                                                                                                        | 9,125                           | <10 <sup>6</sup>                  | <10 <sup>6</sup>                    | <10 <sup>6</sup>                  | <10 <sup>6</sup>                                        |
|                        | 40 - <50                                                                                                                                        | 4,948                           | <10 <sup>6</sup>                  | <10 <sup>6</sup>                    | <10 <sup>6</sup>                  | <10 <sup>6</sup>                                        |
|                        | 50 - <60                                                                                                                                        | 2,224                           | <10 <sup>6</sup>                  | <10 <sup>6</sup>                    | <10 <sup>6</sup>                  | <10 <sup>6</sup>                                        |
|                        | 60 - <70                                                                                                                                        | 751                             | <10 <sup>6</sup>                  | <10 <sup>6</sup>                    | <10 <sup>6</sup>                  | <10 <sup>6</sup>                                        |
|                        | 70 - <80                                                                                                                                        | 238                             | <10 <sup>6</sup>                  | <10 <sup>6</sup>                    | <10 <sup>6</sup>                  | <10 <sup>6</sup>                                        |
|                        | 80 - <90                                                                                                                                        | 53                              | <10 <sup>6</sup>                  | <10 <sup>6</sup>                    | <10 <sup>6</sup>                  | <10 <sup>6</sup>                                        |
|                        | 90 - <100                                                                                                                                       | <10 <sup>u</sup>                | <10 <sup>6</sup>                  | <10 <sup>6</sup>                    | <10 <sup>6</sup>                  | <10 <sup>6</sup>                                        |
|                        | 100 - <110                                                                                                                                      | <10 <sup>u</sup>                | <10 <sup>6</sup>                  | <10 <sup>6</sup>                    | <10 <sup>6</sup>                  | <10 <sup>6</sup>                                        |

<sup>1</sup>Eligible for indicator; <sup>2</sup>Achieve in current prison; <sup>3</sup>Achieve in previous prison; <sup>4</sup>Overall achievement - either current or previous prison; <sup>5</sup>Declined indicator; <sup>6</sup>Suppressed (<10) to avoid disclosure

| Indicator                               | The proportion of people with diabetes and moderate or severe frailty, in whom the last HbA1c is 75 mmol/mol or less in the preceding 12 months |                                 |                                   |                                     |                                   | Community achievement<br>2019/20: 83.34% (QOF<br>19/20) |
|-----------------------------------------|-------------------------------------------------------------------------------------------------------------------------------------------------|---------------------------------|-----------------------------------|-------------------------------------|-----------------------------------|---------------------------------------------------------|
| Group: Diabetes, Asthma & Epilepsy Care |                                                                                                                                                 |                                 |                                   |                                     |                                   |                                                         |
| Variable                                | Population                                                                                                                                      | Eligible <sup>1</sup> (% popln) | Satisfy <sup>2</sup> (% eligible) | Elsewhere <sup>3</sup> (% eligible) | Achieve <sup>4</sup> (% eligible) |                                                         |
| <b>Length of Stay (months)</b>          |                                                                                                                                                 |                                 |                                   |                                     |                                   |                                                         |
| 2017/18                                 | <1                                                                                                                                              | 4,474                           | <10 <sup>6</sup>                  | <10 <sup>6</sup>                    | <10 <sup>6</sup>                  | <10 <sup>6</sup>                                        |
|                                         | 1-<6                                                                                                                                            | 8,075                           | <10 <sup>6</sup>                  | <10 <sup>6</sup>                    | <10 <sup>6</sup>                  | <10 <sup>6</sup>                                        |
|                                         | 6-<12                                                                                                                                           | 3,672                           | <10 <sup>6</sup>                  | <10 <sup>6</sup>                    | <10 <sup>6</sup>                  | <10 <sup>6</sup>                                        |
|                                         | 12-<24                                                                                                                                          | 2,832                           | <10 <sup>6</sup>                  | <10 <sup>6</sup>                    | <10 <sup>6</sup>                  | <10 <sup>6</sup>                                        |
|                                         | 24+                                                                                                                                             | 2,624                           | <10 <sup>6</sup>                  | <10 <sup>6</sup>                    | <10 <sup>6</sup>                  | <10 <sup>6</sup>                                        |
| 2018/19                                 | <1                                                                                                                                              | 4,801                           | <10 <sup>6</sup>                  | <10 <sup>6</sup>                    | <10 <sup>6</sup>                  | <10 <sup>6</sup>                                        |
|                                         | 1-<6                                                                                                                                            | 7,742                           | <10 <sup>6</sup>                  | <10 <sup>6</sup>                    | <10 <sup>6</sup>                  | <10 <sup>6</sup>                                        |
|                                         | 6-<12                                                                                                                                           | 3,616                           | <10 <sup>6</sup>                  | <10 <sup>6</sup>                    | <10 <sup>6</sup>                  | <10 <sup>6</sup>                                        |
|                                         | 12-<24                                                                                                                                          | 3,447                           | <10 <sup>6</sup>                  | <10 <sup>6</sup>                    | <10 <sup>6</sup>                  | <10 <sup>6</sup>                                        |
|                                         | 24+                                                                                                                                             | 2,493                           | <10 <sup>6</sup>                  | <10 <sup>6</sup>                    | <10 <sup>6</sup>                  | <10 <sup>6</sup>                                        |
| 2019/20                                 | <1                                                                                                                                              | 5,745                           | <10 <sup>6</sup>                  | <10 <sup>6</sup>                    | <10 <sup>6</sup>                  | <10 <sup>6</sup>                                        |
|                                         | 1-<6                                                                                                                                            | 9,697                           | <10 <sup>6</sup>                  | <10 <sup>6</sup>                    | <10 <sup>6</sup>                  | <10 <sup>6</sup>                                        |
|                                         | 6-<12                                                                                                                                           | 5,090                           | <10 <sup>6</sup>                  | <10 <sup>6</sup>                    | <10 <sup>6</sup>                  | <10 <sup>6</sup>                                        |
|                                         | 12-<24                                                                                                                                          | 3,244                           | <10 <sup>6</sup>                  | <10 <sup>6</sup>                    | <10 <sup>6</sup>                  | <10 <sup>6</sup>                                        |
|                                         | 24+                                                                                                                                             | 2,035                           | <10 <sup>6</sup>                  | <10 <sup>6</sup>                    | <10 <sup>6</sup>                  | <10 <sup>6</sup>                                        |
| <b>Ethnic Group</b>                     |                                                                                                                                                 |                                 |                                   |                                     |                                   |                                                         |
| 2017/18                                 | White                                                                                                                                           | 15,638                          | <10 <sup>6</sup>                  | <10 <sup>6</sup>                    | <10 <sup>6</sup>                  | <10 <sup>6</sup>                                        |
|                                         | Mixed                                                                                                                                           | 431                             | <10 <sup>6</sup>                  | <10 <sup>6</sup>                    | <10 <sup>6</sup>                  | <10 <sup>6</sup>                                        |
|                                         | Asian or Asian British                                                                                                                          | 813                             | <10 <sup>6</sup>                  | <10 <sup>6</sup>                    | <10 <sup>6</sup>                  | <10 <sup>6</sup>                                        |
|                                         | Black or Black British                                                                                                                          | 404                             | <10 <sup>6</sup>                  | <10 <sup>6</sup>                    | <10 <sup>6</sup>                  | <10 <sup>6</sup>                                        |
|                                         | Chinese and Other                                                                                                                               | 214                             | <10 <sup>6</sup>                  | <10 <sup>6</sup>                    | <10 <sup>6</sup>                  | <10 <sup>6</sup>                                        |
|                                         | Unclassified                                                                                                                                    | 372                             | <10 <sup>6</sup>                  | <10 <sup>6</sup>                    | <10 <sup>6</sup>                  | <10 <sup>6</sup>                                        |
| 2018/19                                 | White                                                                                                                                           | 14,911                          | <10 <sup>6</sup>                  | <10 <sup>6</sup>                    | <10 <sup>6</sup>                  | <10 <sup>6</sup>                                        |
|                                         | Mixed                                                                                                                                           | 371                             | <10 <sup>6</sup>                  | <10 <sup>6</sup>                    | <10 <sup>6</sup>                  | <10 <sup>6</sup>                                        |
|                                         | Asian or Asian British                                                                                                                          | 726                             | <10 <sup>6</sup>                  | <10 <sup>6</sup>                    | <10 <sup>6</sup>                  | <10 <sup>6</sup>                                        |
|                                         | Black or Black British                                                                                                                          | 364                             | <10 <sup>6</sup>                  | <10 <sup>6</sup>                    | <10 <sup>6</sup>                  | <10 <sup>6</sup>                                        |
|                                         | Chinese and Other                                                                                                                               | 167                             | <10 <sup>6</sup>                  | <10 <sup>6</sup>                    | <10 <sup>6</sup>                  | <10 <sup>6</sup>                                        |
|                                         | Unclassified                                                                                                                                    | 409                             | <10 <sup>6</sup>                  | <10 <sup>6</sup>                    | <10 <sup>6</sup>                  | <10 <sup>6</sup>                                        |
| 2019/20                                 | White                                                                                                                                           | 16,606                          | 13 (0.1)                          | <10 <sup>6</sup>                    | <10 <sup>6</sup>                  | <10 <sup>6</sup>                                        |
|                                         | Mixed                                                                                                                                           | 409                             | <10 <sup>6</sup>                  | <10 <sup>6</sup>                    | <10 <sup>6</sup>                  | <10 <sup>6</sup>                                        |
|                                         | Asian or Asian British                                                                                                                          | 755                             | <10 <sup>6</sup>                  | <10 <sup>6</sup>                    | <10 <sup>6</sup>                  | <10 <sup>6</sup>                                        |
|                                         | Black or Black British                                                                                                                          | 451                             | <10 <sup>6</sup>                  | <10 <sup>6</sup>                    | <10 <sup>6</sup>                  | <10 <sup>6</sup>                                        |
|                                         | Chinese and Other                                                                                                                               | 163                             | <10 <sup>6</sup>                  | <10 <sup>6</sup>                    | <10 <sup>6</sup>                  | <10 <sup>6</sup>                                        |
|                                         | Unclassified                                                                                                                                    | 387                             | <10 <sup>6</sup>                  | <10 <sup>6</sup>                    | <10 <sup>6</sup>                  | <10 <sup>6</sup>                                        |

<sup>1</sup>Eligible for indicator; <sup>2</sup>Achieve in current prison; <sup>3</sup>Achieve in previous prison; <sup>4</sup>Overall achievement - either current or previous prison; <sup>5</sup>Declined indicator; <sup>6</sup>Suppressed (<10) to avoid disclosure

| Indicator                               |            | The proportion of people with asthma who have had an asthma review in the preceding 12 months that includes an assessment of asthma control |                                   |                                     |                                   |  | Community achievement 2019/20: 67.14% (QOF 19/20) |
|-----------------------------------------|------------|---------------------------------------------------------------------------------------------------------------------------------------------|-----------------------------------|-------------------------------------|-----------------------------------|--|---------------------------------------------------|
| Group: Diabetes, Asthma & Epilepsy Care |            |                                                                                                                                             |                                   |                                     |                                   |  |                                                   |
| Variable                                | Population | Eligible <sup>1</sup> (% popln)                                                                                                             | Satisfy <sup>2</sup> (% eligible) | Elsewhere <sup>3</sup> (% eligible) | Achieve <sup>4</sup> (% eligible) |  |                                                   |
| <b>Year</b>                             |            |                                                                                                                                             |                                   |                                     |                                   |  |                                                   |
| 2017/18                                 | 21,677     | 3,227 (14.9)                                                                                                                                | 530 (16.4)                        | 73 (2.3)                            | 599 (18.6)                        |  |                                                   |
| 2018/19                                 | 22,099     | 3,720 (16.8)                                                                                                                                | 175 (4.7)                         | 34 (0.9)                            | 209 (5.6)                         |  |                                                   |
| 2019/20                                 | 25,811     | 4,459 (17.3)                                                                                                                                | 101 (2.3)                         | 35 (0.8)                            | 136 (3.1)                         |  |                                                   |
| <b>Prison</b>                           |            |                                                                                                                                             |                                   |                                     |                                   |  |                                                   |
| 2017/18                                 |            |                                                                                                                                             |                                   |                                     |                                   |  |                                                   |
| Prison 1                                | 1,323      | 243 (18.4)                                                                                                                                  | 45 (18.5)                         | 15 (6.2)                            | 59 (24.3)                         |  |                                                   |
| Prison 2                                | 3,261      | 465 (14.3)                                                                                                                                  | 91 (19.6)                         | <10 <sup>6</sup>                    | 95 (20.4)                         |  |                                                   |
| Prison 3                                | 2,623      | 297 (11.3)                                                                                                                                  | 15 (5.1)                          | <10 <sup>6</sup>                    | 23 (7.7)                          |  |                                                   |
| Prison 4                                | 2,089      | 256 (12.3)                                                                                                                                  | 61 (23.8)                         | <10 <sup>6</sup>                    | 65 (25.4)                         |  |                                                   |
| Prison 5                                | 637        | 60 (9.4)                                                                                                                                    | <10 <sup>6</sup>                  | <10 <sup>6</sup>                    | <10 <sup>6</sup>                  |  |                                                   |
| Prison 6                                | 1,552      | 280 (18.0)                                                                                                                                  | 52 (18.6)                         | 11 (3.9)                            | 63 (22.5)                         |  |                                                   |
| Prison 7                                | 635        | 175 (27.6)                                                                                                                                  | 47 (26.9)                         | <10 <sup>6</sup>                    | 50 (28.6)                         |  |                                                   |
| Prison 8                                | 1,085      | 232 (21.4)                                                                                                                                  | 39 (16.8)                         | <10 <sup>6</sup>                    | 42 (18.1)                         |  |                                                   |
| Prison 9                                | 981        | 125 (12.7)                                                                                                                                  | 51 (40.8)                         | <10 <sup>6</sup>                    | 54 (43.2)                         |  |                                                   |
| Prison 10                               | 2,523      | 482 (19.1)                                                                                                                                  | 36 (7.5)                          | <10 <sup>6</sup>                    | 36 (7.5)                          |  |                                                   |
| Prison 11                               | 3,470      | 383 (11.0)                                                                                                                                  | <10 <sup>6</sup>                  | 17 (4.4)                            | 17 (4.4)                          |  |                                                   |
| Prison 12                               | 815        | 155 (19.0)                                                                                                                                  | 46 (29.7)                         | <10 <sup>6</sup>                    | 46 (29.7)                         |  |                                                   |
| Prison 13                               | 683        | 74 (10.8)                                                                                                                                   | 44 (59.5)                         | <10 <sup>6</sup>                    | 44 (59.5)                         |  |                                                   |
| 2018/19                                 |            |                                                                                                                                             |                                   |                                     |                                   |  |                                                   |
| Prison 1                                | 1,333      | 240 (18.0)                                                                                                                                  | <10 <sup>6</sup>                  | <10 <sup>6</sup>                    | <10 <sup>6</sup>                  |  |                                                   |
| Prison 2                                | 2,705      | 390 (14.4)                                                                                                                                  | 17 (4.4)                          | <10 <sup>6</sup>                    | 19 (4.9)                          |  |                                                   |
| Prison 3                                | 2,522      | 374 (14.8)                                                                                                                                  | <10 <sup>6</sup>                  | <10 <sup>6</sup>                    | <10 <sup>6</sup>                  |  |                                                   |
| Prison 4                                | 2,349      | 354 (15.1)                                                                                                                                  | 37 (10.5)                         | <10 <sup>6</sup>                    | 39 (11.0)                         |  |                                                   |
| Prison 5                                | 676        | 72 (10.7)                                                                                                                                   | <10 <sup>6</sup>                  | <10 <sup>6</sup>                    | <10 <sup>6</sup>                  |  |                                                   |
| Prison 6                                | 1,513      | 240 (15.9)                                                                                                                                  | <10 <sup>6</sup>                  | <10 <sup>6</sup>                    | 12 (5.0)                          |  |                                                   |
| Prison 7                                | 654        | 204 (31.2)                                                                                                                                  | 21 (10.3)                         | <10 <sup>6</sup>                    | 24 (11.8)                         |  |                                                   |
| Prison 8                                | 1,148      | 340 (29.6)                                                                                                                                  | 14 (4.1)                          | <10 <sup>6</sup>                    | 14 (4.1)                          |  |                                                   |
| Prison 9                                | 996        | 147 (14.8)                                                                                                                                  | 34 (23.1)                         | <10 <sup>6</sup>                    | 35 (23.8)                         |  |                                                   |
| Prison 10                               | 2,717      | 486 (17.9)                                                                                                                                  | <10 <sup>6</sup>                  | <10 <sup>6</sup>                    | <10 <sup>6</sup>                  |  |                                                   |
| Prison 11                               | 4,020      | 623 (15.5)                                                                                                                                  | <10 <sup>6</sup>                  | 11 (1.8)                            | 11 (1.8)                          |  |                                                   |
| Prison 12                               | 792        | 153 (19.3)                                                                                                                                  | <10 <sup>6</sup>                  | <10 <sup>6</sup>                    | <10 <sup>6</sup>                  |  |                                                   |
| Prison 13                               | 674        | 97 (14.4)                                                                                                                                   | 28 (28.9)                         | <10 <sup>6</sup>                    | 29 (29.9)                         |  |                                                   |
| 2019/20                                 |            |                                                                                                                                             |                                   |                                     |                                   |  |                                                   |
| Prison 1                                | 1,410      | 256 (18.2)                                                                                                                                  | <10 <sup>6</sup>                  | <10 <sup>6</sup>                    | <10 <sup>6</sup>                  |  |                                                   |
| Prison 2                                | 2,979      | 515 (17.3)                                                                                                                                  | <10 <sup>6</sup>                  | <10 <sup>6</sup>                    | <10 <sup>6</sup>                  |  |                                                   |
| Prison 3                                | 2,809      | 441 (15.7)                                                                                                                                  | <10 <sup>6</sup>                  | <10 <sup>6</sup>                    | 11 (2.5)                          |  |                                                   |
| Prison 4                                | 2,651      | 465 (17.5)                                                                                                                                  | 24 (5.2)                          | <10 <sup>6</sup>                    | 24 (5.2)                          |  |                                                   |
| Prison 5                                | 616        | 82 (13.3)                                                                                                                                   | <10 <sup>6</sup>                  | <10 <sup>6</sup>                    | <10 <sup>6</sup>                  |  |                                                   |
| Prison 6                                | 1,533      | 281 (18.3)                                                                                                                                  | <10 <sup>6</sup>                  | <10 <sup>6</sup>                    | <10 <sup>6</sup>                  |  |                                                   |
| Prison 7                                | 860        | 280 (32.6)                                                                                                                                  | 13 (4.6)                          | <10 <sup>6</sup>                    | 15 (5.4)                          |  |                                                   |
| Prison 8                                | 1,385      | 372 (26.9)                                                                                                                                  | <10 <sup>6</sup>                  | <10 <sup>6</sup>                    | <10 <sup>6</sup>                  |  |                                                   |
| Prison 9                                | 1,092      | 166 (15.2)                                                                                                                                  | 20 (12.0)                         | <10 <sup>6</sup>                    | 21 (12.7)                         |  |                                                   |
| Prison 10                               | 3,577      | 577 (16.1)                                                                                                                                  | <10 <sup>6</sup>                  | <10 <sup>6</sup>                    | <10 <sup>6</sup>                  |  |                                                   |
| Prison 11                               | 5,348      | 765 (14.3)                                                                                                                                  | <10 <sup>6</sup>                  | <10 <sup>6</sup>                    | <10 <sup>6</sup>                  |  |                                                   |
| Prison 12                               | 805        | 134 (16.6)                                                                                                                                  | <10 <sup>6</sup>                  | <10 <sup>6</sup>                    | <10 <sup>6</sup>                  |  |                                                   |
| Prison 13                               | 746        | 125 (16.8)                                                                                                                                  | 18 (14.4)                         | <10 <sup>6</sup>                    | 18 (14.4)                         |  |                                                   |
| <b>Prison category</b>                  |            |                                                                                                                                             |                                   |                                     |                                   |  |                                                   |
| 2017/18                                 |            |                                                                                                                                             |                                   |                                     |                                   |  |                                                   |
| A                                       | 1,664      | 199 (12.0)                                                                                                                                  | 95 (47.7)                         | <10 <sup>6</sup>                    | 98 (49.2)                         |  |                                                   |
| B                                       | 9,254      | 1,330 (14.4)                                                                                                                                | 127 (9.5)                         | 21 (1.6)                            | 148 (11.1)                        |  |                                                   |
| C                                       | 6,035      | 796 (13.2)                                                                                                                                  | 121 (15.2)                        | 27 (3.4)                            | 147 (18.5)                        |  |                                                   |
| Closed                                  | 1,720      | 407 (23.7)                                                                                                                                  | 86 (21.1)                         | <10 <sup>6</sup>                    | 92 (22.6)                         |  |                                                   |
| D                                       | 2,189      | 340 (15.5)                                                                                                                                  | 55 (16.2)                         | 13 (3.8)                            | 68 (20.0)                         |  |                                                   |
| YOI                                     | 815        | 155 (19.0)                                                                                                                                  | 46 (29.7)                         | <10 <sup>6</sup>                    | 46 (29.7)                         |  |                                                   |
| 2018/19                                 |            |                                                                                                                                             |                                   |                                     |                                   |  |                                                   |
| A                                       | 1,670      | 244 (14.6)                                                                                                                                  | 62 (25.4)                         | <10 <sup>6</sup>                    | 64 (26.2)                         |  |                                                   |
| B                                       | 9,442      | 1,499 (15.9)                                                                                                                                | 18 (1.2)                          | 13 (0.9)                            | 31 (2.1)                          |  |                                                   |
| C                                       | 6,204      | 968 (15.6)                                                                                                                                  | 46 (4.8)                          | <10 <sup>6</sup>                    | 54 (5.6)                          |  |                                                   |
| Closed                                  | 1,802      | 544 (30.2)                                                                                                                                  | 35 (6.4)                          | <10 <sup>6</sup>                    | 38 (7.0)                          |  |                                                   |
| D                                       | 2,189      | 312 (14.3)                                                                                                                                  | <10 <sup>6</sup>                  | <10 <sup>6</sup>                    | 13 (4.2)                          |  |                                                   |
| YOI                                     | 792        | 153 (19.3)                                                                                                                                  | <10 <sup>6</sup>                  | <10 <sup>6</sup>                    | <10 <sup>6</sup>                  |  |                                                   |
| 2019/20                                 |            |                                                                                                                                             |                                   |                                     |                                   |  |                                                   |
| A                                       | 1,838      | 291 (15.8)                                                                                                                                  | 38 (13.1)                         | <10 <sup>6</sup>                    | 39 (13.4)                         |  |                                                   |
| B                                       | 11,904     | 1,857 (15.6)                                                                                                                                | <10 <sup>6</sup>                  | 11 (0.6)                            | 20 (1.1)                          |  |                                                   |
| C                                       | 6,870      | 1,162 (16.9)                                                                                                                                | 27 (2.3)                          | 15 (1.3)                            | 42 (3.6)                          |  |                                                   |
| Closed                                  | 2,245      | 652 (29.0)                                                                                                                                  | 22 (3.4)                          | <10 <sup>6</sup>                    | 24 (3.7)                          |  |                                                   |
| D                                       | 2,149      | 363 (16.9)                                                                                                                                  | <10 <sup>6</sup>                  | <10 <sup>6</sup>                    | <10 <sup>6</sup>                  |  |                                                   |
| YOI                                     | 805        | 134 (16.6)                                                                                                                                  | <10 <sup>6</sup>                  | <10 <sup>6</sup>                    | <10 <sup>6</sup>                  |  |                                                   |
| <b>Gender</b>                           |            |                                                                                                                                             |                                   |                                     |                                   |  |                                                   |
| 2017/18                                 |            |                                                                                                                                             |                                   |                                     |                                   |  |                                                   |
| F                                       | 1,699      | 406 (23.9)                                                                                                                                  | 86 (21.2)                         | <10 <sup>6</sup>                    | 92 (22.7)                         |  |                                                   |
| M                                       | 19,977     | 2,821 (14.1)                                                                                                                                | 444 (15.7)                        | 67 (2.4)                            | 507 (18.0)                        |  |                                                   |
| 2018/19                                 |            |                                                                                                                                             |                                   |                                     |                                   |  |                                                   |
| F                                       | 1,802      | 544 (30.2)                                                                                                                                  | 35 (6.4)                          | <10 <sup>6</sup>                    | 38 (7.0)                          |  |                                                   |
| M                                       | 20,295     | 3,176 (15.6)                                                                                                                                | 140 (4.4)                         | 31 (1.0)                            | 171 (5.4)                         |  |                                                   |
| 2019/20                                 |            |                                                                                                                                             |                                   |                                     |                                   |  |                                                   |
| F                                       | 1,376      | 370 (26.9)                                                                                                                                  | <10 <sup>6</sup>                  | <10 <sup>6</sup>                    | <10 <sup>6</sup>                  |  |                                                   |
| M                                       | 23,570     | 3,809 (16.2)                                                                                                                                | 79 (2.1)                          | 33 (0.9)                            | 112 (2.9)                         |  |                                                   |

<sup>1</sup>Eligible for indicator; <sup>2</sup>Achieve in current prison; <sup>3</sup>Achieve in previous prison; <sup>4</sup>Overall achievement - either current or previous prison; <sup>5</sup>Declined indicator; <sup>6</sup>Suppressed (<10) to avoid disclosure

**Indicator** *The proportion of people with asthma who have had an asthma review in the preceding 12 months that includes an assessment of asthma control*

Community achievement 2019/20: 67.14% (QOF 19/20)

**Group: Diabetes, Asthma & Epilepsy Care**

| Variable               | Population                     | Eligible <sup>1</sup> (% popln) | Satisfy <sup>2</sup> (% eligible) | Elsewhere <sup>3</sup> (% eligible) | Achieve <sup>4</sup> (% eligible) |
|------------------------|--------------------------------|---------------------------------|-----------------------------------|-------------------------------------|-----------------------------------|
| <b>Sentence Status</b> |                                |                                 |                                   |                                     |                                   |
| 2017/18                | .                              | 81                              | 12 (14.8)                         | <10 <sup>6</sup>                    | <10 <sup>6</sup>                  |
|                        | Absconded                      | <10 <sup>u</sup>                | <10 <sup>6</sup>                  | <10 <sup>6</sup>                    | <10 <sup>6</sup>                  |
|                        | Active In                      | 15,872                          | 2,316 (14.6)                      | 395 (17.1)                          | 65 (2.8)                          |
|                        | Active Out                     | 1,052                           | 166 (15.8)                        | 17 (10.2)                           | <10 <sup>6</sup>                  |
|                        | Convicted Sentence             | 2,125                           | 336 (15.8)                        | 41 (12.2)                           | <10 <sup>6</sup>                  |
|                        | Downgrade in security category | <10 <sup>u</sup>                | <10 <sup>6</sup>                  | <10 <sup>6</sup>                    | <10 <sup>6</sup>                  |
|                        | Internal Cell Move             | <10 <sup>u</sup>                | <10 <sup>6</sup>                  | <10 <sup>6</sup>                    | <10 <sup>6</sup>                  |
|                        | Judges Remand                  | 92                              | 20 (21.7)                         | <10 <sup>6</sup>                    | <10 <sup>6</sup>                  |
|                        | Licence Revoke                 | 52                              | <10 <sup>6</sup>                  | <10 <sup>6</sup>                    | <10 <sup>6</sup>                  |
|                        | On Remand                      | 1,492                           | 209 (14.0)                        | 40 (19.1)                           | <10 <sup>6</sup>                  |
|                        | Transfer                       | 910                             | 160 (17.6)                        | 34 (21.3)                           | <10 <sup>6</sup>                  |
|                        | Upgrade in security category   | <10 <sup>u</sup>                | <10 <sup>6</sup>                  | <10 <sup>6</sup>                    | <10 <sup>6</sup>                  |
| 2018/19                | .                              | 88                              | <10 <sup>6</sup>                  | <10 <sup>6</sup>                    | <10 <sup>6</sup>                  |
|                        | Absconded                      | <10 <sup>u</sup>                | <10 <sup>6</sup>                  | <10 <sup>6</sup>                    | <10 <sup>6</sup>                  |
|                        | Active In                      | 18,145                          | 3,112 (17.2)                      | 158 (5.1)                           | 31 (1.0)                          |
|                        | Active Out                     | 835                             | 147 (17.6)                        | <10 <sup>6</sup>                    | <10 <sup>6</sup>                  |
|                        | Convicted Sentence             | 1,320                           | 198 (15.0)                        | 11 (5.6)                            | <10 <sup>6</sup>                  |
|                        | Downgrade in security category | <10 <sup>u</sup>                | <10 <sup>6</sup>                  | <10 <sup>6</sup>                    | <10 <sup>6</sup>                  |
|                        | Internal Cell Move             | <10 <sup>u</sup>                | <10 <sup>6</sup>                  | <10 <sup>6</sup>                    | <10 <sup>6</sup>                  |
|                        | Judges Remand                  | <10 <sup>u</sup>                | <10 <sup>6</sup>                  | <10 <sup>6</sup>                    | <10 <sup>6</sup>                  |
|                        | Licence Revoke                 | 125                             | 30 (24.0)                         | <10 <sup>6</sup>                    | <10 <sup>6</sup>                  |
|                        | On Remand                      | 1,059                           | 148 (14.0)                        | <10 <sup>6</sup>                    | <10 <sup>6</sup>                  |
|                        | Transfer                       | 518                             | 77 (14.9)                         | <10 <sup>6</sup>                    | <10 <sup>6</sup>                  |
|                        | Upgrade in security category   | <10 <sup>u</sup>                | <10 <sup>6</sup>                  | <10 <sup>6</sup>                    | <10 <sup>6</sup>                  |
| 2019/20                | .                              | 69                              | <10 <sup>6</sup>                  | <10 <sup>6</sup>                    | <10 <sup>6</sup>                  |
|                        | Absconded                      | <10 <sup>u</sup>                | <10 <sup>6</sup>                  | <10 <sup>6</sup>                    | <10 <sup>6</sup>                  |
|                        | Active In                      | 22,424                          | 3,875 (17.3)                      | 94 (2.4)                            | 35 (0.9)                          |
|                        | Active Out                     | 625                             | 113 (18.1)                        | <10 <sup>6</sup>                    | <10 <sup>6</sup>                  |
|                        | Convicted Sentence             | 1,361                           | 235 (17.3)                        | <10 <sup>6</sup>                    | <10 <sup>6</sup>                  |
|                        | Downgrade in security category | <10 <sup>u</sup>                | <10 <sup>6</sup>                  | <10 <sup>6</sup>                    | <10 <sup>6</sup>                  |
|                        | Internal Cell Move             | <10 <sup>u</sup>                | <10 <sup>6</sup>                  | <10 <sup>6</sup>                    | <10 <sup>6</sup>                  |
|                        | Judges Remand                  | 19                              | <10 <sup>6</sup>                  | <10 <sup>6</sup>                    | <10 <sup>6</sup>                  |
|                        | Licence Revoke                 | 178                             | 35 (19.7)                         | <10 <sup>6</sup>                    | <10 <sup>6</sup>                  |
|                        | On Remand                      | 1,031                           | 174 (16.9)                        | <10 <sup>6</sup>                    | <10 <sup>6</sup>                  |
|                        | Transfer                       | 101                             | 19 (18.8)                         | <10 <sup>6</sup>                    | <10 <sup>6</sup>                  |
|                        | Upgrade in security category   | <10 <sup>u</sup>                | <10 <sup>6</sup>                  | <10 <sup>6</sup>                    | <10 <sup>6</sup>                  |
| <b>Age - years</b>     |                                |                                 |                                   |                                     |                                   |
| 2017/18                | 10 - <20                       | 468                             | 68 (14.5)                         | 17 (25.0)                           | <10 <sup>6</sup>                  |
|                        | 20 - <30                       | 6,994                           | 1,023 (14.6)                      | 126 (12.3)                          | 19 (1.9)                          |
|                        | 30 - <40                       | 7,051                           | 980 (13.9)                        | 137 (14.0)                          | 26 (2.7)                          |
|                        | 40 - <50                       | 4,114                           | 705 (17.1)                        | 136 (19.3)                          | 16 (2.3)                          |
|                        | 50 - <60                       | 2,107                           | 332 (15.8)                        | 71 (21.4)                           | <10 <sup>6</sup>                  |
|                        | 60 - <70                       | 684                             | 92 (13.5)                         | 32 (34.8)                           | <10 <sup>6</sup>                  |
|                        | 70 - <80                       | 213                             | 24 (11.3)                         | 11 (45.8)                           | <10 <sup>6</sup>                  |
|                        | 80 - <90                       | 40                              | <10 <sup>6</sup>                  | <10 <sup>6</sup>                    | <10 <sup>6</sup>                  |
|                        | 90 - <100                      | <10 <sup>u</sup>                | <10 <sup>6</sup>                  | <10 <sup>6</sup>                    | <10 <sup>6</sup>                  |
|                        | 100 - <110                     | <10 <sup>u</sup>                | <10 <sup>6</sup>                  | <10 <sup>6</sup>                    | <10 <sup>6</sup>                  |
| 2018/19                | 10 - <20                       | 436                             | 64 (14.7)                         | <10 <sup>6</sup>                    | <10 <sup>6</sup>                  |
|                        | 20 - <30                       | 7,163                           | 1,143 (16.0)                      | 22 (1.9)                            | 13 (1.1)                          |
|                        | 30 - <40                       | 7,381                           | 1,242 (16.8)                      | 52 (4.2)                            | 12 (1.0)                          |
|                        | 40 - <50                       | 4,180                           | 784 (18.8)                        | 42 (5.4)                            | <10 <sup>6</sup>                  |
|                        | 50 - <60                       | 1,978                           | 347 (17.5)                        | 32 (9.2)                            | <10 <sup>6</sup>                  |
|                        | 60 - <70                       | 701                             | 105 (15.0)                        | 16 (15.2)                           | <10 <sup>6</sup>                  |
|                        | 70 - <80                       | 209                             | 27 (12.9)                         | <10 <sup>6</sup>                    | <10 <sup>6</sup>                  |
|                        | 80 - <90                       | 45                              | <10 <sup>6</sup>                  | <10 <sup>6</sup>                    | <10 <sup>6</sup>                  |
|                        | 90 - <100                      | <10 <sup>u</sup>                | <10 <sup>6</sup>                  | <10 <sup>6</sup>                    | <10 <sup>6</sup>                  |
|                        | 100 - <110                     | <10 <sup>u</sup>                | <10 <sup>6</sup>                  | <10 <sup>6</sup>                    | <10 <sup>6</sup>                  |
| 2019/20                | 10 - <20                       | 404                             | 42 (10.4)                         | <10 <sup>6</sup>                    | <10 <sup>6</sup>                  |
|                        | 20 - <30                       | 8,064                           | 1,275 (15.8)                      | 14 (1.1)                            | <10 <sup>6</sup>                  |
|                        | 30 - <40                       | 9,125                           | 1,633 (17.9)                      | 26 (1.6)                            | 14 (0.9)                          |
|                        | 40 - <50                       | 4,948                           | 940 (19.0)                        | 22 (2.3)                            | <10 <sup>6</sup>                  |
|                        | 50 - <60                       | 2,224                           | 396 (17.8)                        | 21 (5.3)                            | <10 <sup>6</sup>                  |
|                        | 60 - <70                       | 751                             | 117 (15.6)                        | 13 (11.1)                           | <10 <sup>6</sup>                  |
|                        | 70 - <80                       | 238                             | 43 (18.1)                         | <10 <sup>6</sup>                    | <10 <sup>6</sup>                  |
|                        | 80 - <90                       | 53                              | 11 (20.8)                         | <10 <sup>6</sup>                    | <10 <sup>6</sup>                  |
|                        | 90 - <100                      | <10 <sup>u</sup>                | <10 <sup>6</sup>                  | <10 <sup>6</sup>                    | <10 <sup>6</sup>                  |
|                        | 100 - <110                     | <10 <sup>u</sup>                | <10 <sup>6</sup>                  | <10 <sup>6</sup>                    | <10 <sup>6</sup>                  |

<sup>1</sup>Eligible for indicator; <sup>2</sup>Achieve in current prison; <sup>3</sup>Achieve in previous prison; <sup>4</sup>Overall achievement - either current or previous prison; <sup>5</sup>Declined indicator; <sup>6</sup>Suppressed (<10) to avoid disclosure

| Indicator                               |                        | The proportion of people with asthma who have had an asthma review in the preceding 12 months that includes an assessment of asthma control |                                   |                                     |                                   |                  |
|-----------------------------------------|------------------------|---------------------------------------------------------------------------------------------------------------------------------------------|-----------------------------------|-------------------------------------|-----------------------------------|------------------|
| Group: Diabetes, Asthma & Epilepsy Care |                        | Community achievement 2019/20: 67.14% (QOF 19/20)                                                                                           |                                   |                                     |                                   |                  |
| Variable                                | Population             | Eligible <sup>1</sup> (% popln)                                                                                                             | Satisfy <sup>2</sup> (% eligible) | Elsewhere <sup>3</sup> (% eligible) | Achieve <sup>4</sup> (% eligible) |                  |
| <b>Length of Stay (months)</b>          |                        |                                                                                                                                             |                                   |                                     |                                   |                  |
| 2017/18                                 | <1                     | 4,474                                                                                                                                       | 588 (13.1)                        | 12 (2.0)                            | 10 (1.7)                          | 22 (3.7)         |
|                                         | 1-<6                   | 8,075                                                                                                                                       | 1,193 (14.8)                      | 116 (9.7)                           | 28 (2.3)                          | 141 (11.8)       |
|                                         | 6-<12                  | 3,672                                                                                                                                       | 566 (15.4)                        | 114 (20.1)                          | 16 (2.8)                          | 130 (23.0)       |
|                                         | 12-<24                 | 2,832                                                                                                                                       | 447 (15.8)                        | 127 (28.4)                          | 12 (2.7)                          | 138 (30.9)       |
|                                         | 24+                    | 2,624                                                                                                                                       | 433 (16.5)                        | 161 (37.2)                          | <10 <sup>6</sup>                  | 168 (38.8)       |
| 2018/19                                 | <1                     | 4,801                                                                                                                                       | 731 (15.2)                        | <10 <sup>6</sup>                    | <10 <sup>6</sup>                  | <10 <sup>6</sup> |
|                                         | 1-<6                   | 7,742                                                                                                                                       | 1,332 (17.2)                      | 13 (1.0)                            | 11 (0.8)                          | 24 (1.8)         |
|                                         | 6-<12                  | 3,616                                                                                                                                       | 609 (16.8)                        | 11 (1.8)                            | <10 <sup>6</sup>                  | 16 (2.6)         |
|                                         | 12-<24                 | 3,447                                                                                                                                       | 620 (18.0)                        | 48 (7.7)                            | 13 (2.1)                          | 61 (9.8)         |
|                                         | 24+                    | 2,493                                                                                                                                       | 428 (17.2)                        | 102 (23.8)                          | <10 <sup>6</sup>                  | 102 (23.8)       |
| 2019/20                                 | <1                     | 5,745                                                                                                                                       | 854 (14.9)                        | <10 <sup>6</sup>                    | <10 <sup>6</sup>                  | <10 <sup>6</sup> |
|                                         | 1-<6                   | 9,697                                                                                                                                       | 1,667 (17.2)                      | <10 <sup>6</sup>                    | 12 (0.7)                          | 21 (1.3)         |
|                                         | 6-<12                  | 5,090                                                                                                                                       | 974 (19.1)                        | 11 (1.1)                            | 16 (1.6)                          | 27 (2.8)         |
|                                         | 12-<24                 | 3,244                                                                                                                                       | 614 (18.9)                        | 16 (2.6)                            | <10 <sup>6</sup>                  | 18 (2.9)         |
|                                         | 24+                    | 2,035                                                                                                                                       | 350 (17.2)                        | 63 (18.0)                           | <10 <sup>6</sup>                  | 63 (18.0)        |
| <b>Ethnic Group</b>                     |                        |                                                                                                                                             |                                   |                                     |                                   |                  |
| 2017/18                                 | White                  | 15,638                                                                                                                                      | 2,619 (16.7)                      | 427 (16.3)                          | 59 (2.3)                          | 484 (18.5)       |
|                                         | Mixed                  | 431                                                                                                                                         | 78 (18.1)                         | 15 (19.2)                           | <10 <sup>6</sup>                  | 17 (21.8)        |
|                                         | Asian or Asian British | 813                                                                                                                                         | 117 (14.4)                        | 26 (22.2)                           | <10 <sup>6</sup>                  | 28 (23.9)        |
|                                         | Black or Black British | 404                                                                                                                                         | 58 (14.4)                         | <10 <sup>6</sup>                    | <10 <sup>6</sup>                  | <10 <sup>6</sup> |
|                                         | Chinese and Other      | 214                                                                                                                                         | 14 (6.5)                          | <10 <sup>6</sup>                    | <10 <sup>6</sup>                  | <10 <sup>6</sup> |
|                                         | Unclassified           | 372                                                                                                                                         | 43 (11.6)                         | 14 (32.6)                           | <10 <sup>6</sup>                  | 15 (34.9)        |
| 2018/19                                 | White                  | 14,911                                                                                                                                      | 2,770 (18.6)                      | 140 (5.1)                           | 22 (0.8)                          | 162 (5.8)        |
|                                         | Mixed                  | 371                                                                                                                                         | 73 (19.7)                         | <10 <sup>6</sup>                    | <10 <sup>6</sup>                  | <10 <sup>6</sup> |
|                                         | Asian or Asian British | 726                                                                                                                                         | 113 (15.6)                        | <10 <sup>6</sup>                    | <10 <sup>6</sup>                  | 13 (11.5)        |
|                                         | Black or Black British | 364                                                                                                                                         | 63 (17.3)                         | <10 <sup>6</sup>                    | <10 <sup>6</sup>                  | <10 <sup>6</sup> |
|                                         | Chinese and Other      | 167                                                                                                                                         | 23 (13.8)                         | <10 <sup>6</sup>                    | <10 <sup>6</sup>                  | <10 <sup>6</sup> |
|                                         | Unclassified           | 409                                                                                                                                         | 67 (16.4)                         | <10 <sup>6</sup>                    | <10 <sup>6</sup>                  | <10 <sup>6</sup> |
| 2019/20                                 | White                  | 16,606                                                                                                                                      | 3,352 (20.2)                      | 84 (2.5)                            | 29 (0.9)                          | 113 (3.4)        |
|                                         | Mixed                  | 409                                                                                                                                         | 101 (24.7)                        | <10 <sup>6</sup>                    | <10 <sup>6</sup>                  | <10 <sup>6</sup> |
|                                         | Asian or Asian British | 755                                                                                                                                         | 129 (17.1)                        | <10 <sup>6</sup>                    | <10 <sup>6</sup>                  | <10 <sup>6</sup> |
|                                         | Black or Black British | 451                                                                                                                                         | 88 (19.5)                         | <10 <sup>6</sup>                    | <10 <sup>6</sup>                  | <10 <sup>6</sup> |
|                                         | Chinese and Other      | 163                                                                                                                                         | 22 (13.5)                         | <10 <sup>6</sup>                    | <10 <sup>6</sup>                  | <10 <sup>6</sup> |
|                                         | Unclassified           | 387                                                                                                                                         | 66 (17.1)                         | <10 <sup>6</sup>                    | <10 <sup>6</sup>                  | <10 <sup>6</sup> |

<sup>1</sup>Eligible for indicator; <sup>2</sup>Achieve in current prison; <sup>3</sup>Achieve in previous prison; <sup>4</sup>Overall achievement - either current or previous prison; <sup>5</sup>Declined indicator; <sup>6</sup>Suppressed (<10) to avoid disclosure

| Indicator                               |           | <i>The proportion of people on drug treatment for epilepsy who have had an annual review and recorded as seizure free in the preceding 12 months</i> |                                 |                                                 |                                                | no comparable data in QOF 2019/20. Most recent QOF was 2013/14 which was 57.50% |
|-----------------------------------------|-----------|------------------------------------------------------------------------------------------------------------------------------------------------------|---------------------------------|-------------------------------------------------|------------------------------------------------|---------------------------------------------------------------------------------|
| Group: Diabetes, Asthma & Epilepsy Care |           |                                                                                                                                                      |                                 |                                                 |                                                |                                                                                 |
|                                         | Variable  | Population                                                                                                                                           | Eligible <sup>1</sup> (% popln) | Satisfy Annual Review <sup>4</sup> (% eligible) | Satisfy Seizure Free <sup>4</sup> (% eligible) |                                                                                 |
| <b>Year</b>                             |           |                                                                                                                                                      |                                 |                                                 |                                                |                                                                                 |
|                                         | 2017/18   | 21,677                                                                                                                                               | 290 (1.3)                       | <10 <sup>6</sup>                                | <10 <sup>6</sup>                               |                                                                                 |
|                                         | 2018/19   | 22,099                                                                                                                                               | 300 (1.4)                       | 13 (4.3)                                        | <10 <sup>6</sup>                               |                                                                                 |
|                                         | 2019/20   | 25,811                                                                                                                                               | 419 (1.6)                       | <10 <sup>6</sup>                                | <10 <sup>6</sup>                               |                                                                                 |
| <b>Prison</b>                           |           |                                                                                                                                                      |                                 |                                                 |                                                |                                                                                 |
| 2017/18                                 | Prison 1  | 1,323                                                                                                                                                | 19 (1.4)                        | <10 <sup>6</sup>                                | <10 <sup>6</sup>                               |                                                                                 |
|                                         | Prison 2  | 3,261                                                                                                                                                | 40 (1.2)                        | <10 <sup>6</sup>                                | <10 <sup>6</sup>                               |                                                                                 |
|                                         | Prison 3  | 2,623                                                                                                                                                | 35 (1.3)                        | <10 <sup>6</sup>                                | <10 <sup>6</sup>                               |                                                                                 |
|                                         | Prison 4  | 2,089                                                                                                                                                | 30 (1.4)                        | <10 <sup>6</sup>                                | <10 <sup>6</sup>                               |                                                                                 |
|                                         | Prison 5  | 637                                                                                                                                                  | <10 <sup>6</sup>                | <10 <sup>6</sup>                                | <10 <sup>6</sup>                               |                                                                                 |
|                                         | Prison 6  | 1,552                                                                                                                                                | <10 <sup>6</sup>                | <10 <sup>6</sup>                                | <10 <sup>6</sup>                               |                                                                                 |
|                                         | Prison 7  | 635                                                                                                                                                  | 19 (3.0)                        | <10 <sup>6</sup>                                | <10 <sup>6</sup>                               |                                                                                 |
|                                         | Prison 8  | 1,085                                                                                                                                                | 21 (1.9)                        | <10 <sup>6</sup>                                | <10 <sup>6</sup>                               |                                                                                 |
|                                         | Prison 9  | 981                                                                                                                                                  | 18 (1.8)                        | <10 <sup>6</sup>                                | <10 <sup>6</sup>                               |                                                                                 |
|                                         | Prison 10 | 2,523                                                                                                                                                | 40 (1.6)                        | <10 <sup>6</sup>                                | <10 <sup>6</sup>                               |                                                                                 |
|                                         | Prison 11 | 3,470                                                                                                                                                | 43 (1.2)                        | <10 <sup>6</sup>                                | <10 <sup>6</sup>                               |                                                                                 |
|                                         | Prison 12 | 815                                                                                                                                                  | <10 <sup>6</sup>                | <10 <sup>6</sup>                                | <10 <sup>6</sup>                               |                                                                                 |
|                                         | Prison 13 | 683                                                                                                                                                  | <10 <sup>6</sup>                | <10 <sup>6</sup>                                | <10 <sup>6</sup>                               |                                                                                 |
| 2018/19                                 | Prison 1  | 1,333                                                                                                                                                | 17 (1.3)                        | <10 <sup>6</sup>                                | <10 <sup>6</sup>                               |                                                                                 |
|                                         | Prison 2  | 2,705                                                                                                                                                | 31 (1.1)                        | <10 <sup>6</sup>                                | <10 <sup>6</sup>                               |                                                                                 |
|                                         | Prison 3  | 2,522                                                                                                                                                | 38 (1.5)                        | <10 <sup>6</sup>                                | <10 <sup>6</sup>                               |                                                                                 |
|                                         | Prison 4  | 2,349                                                                                                                                                | 42 (1.8)                        | <10 <sup>6</sup>                                | <10 <sup>6</sup>                               |                                                                                 |
|                                         | Prison 5  | 676                                                                                                                                                  | <10 <sup>6</sup>                | <10 <sup>6</sup>                                | <10 <sup>6</sup>                               |                                                                                 |
|                                         | Prison 6  | 1,513                                                                                                                                                | <10 <sup>6</sup>                | <10 <sup>6</sup>                                | <10 <sup>6</sup>                               |                                                                                 |
|                                         | Prison 7  | 654                                                                                                                                                  | 17 (2.6)                        | <10 <sup>6</sup>                                | <10 <sup>6</sup>                               |                                                                                 |
|                                         | Prison 8  | 1,148                                                                                                                                                | 28 (2.4)                        | <10 <sup>6</sup>                                | <10 <sup>6</sup>                               |                                                                                 |
|                                         | Prison 9  | 996                                                                                                                                                  | 17 (1.7)                        | <10 <sup>6</sup>                                | <10 <sup>6</sup>                               |                                                                                 |
|                                         | Prison 10 | 2,717                                                                                                                                                | 39 (1.4)                        | <10 <sup>6</sup>                                | <10 <sup>6</sup>                               |                                                                                 |
|                                         | Prison 11 | 4,020                                                                                                                                                | 53 (1.3)                        | <10 <sup>6</sup>                                | <10 <sup>6</sup>                               |                                                                                 |
|                                         | Prison 12 | 792                                                                                                                                                  | <10 <sup>6</sup>                | <10 <sup>6</sup>                                | <10 <sup>6</sup>                               |                                                                                 |
|                                         | Prison 13 | 674                                                                                                                                                  | <10 <sup>6</sup>                | <10 <sup>6</sup>                                | <10 <sup>6</sup>                               |                                                                                 |
| 2019/20                                 | Prison 1  | 1,410                                                                                                                                                | 20 (1.4)                        | <10 <sup>6</sup>                                | <10 <sup>6</sup>                               |                                                                                 |
|                                         | Prison 2  | 2,979                                                                                                                                                | 42 (1.4)                        | <10 <sup>6</sup>                                | <10 <sup>6</sup>                               |                                                                                 |
|                                         | Prison 3  | 2,809                                                                                                                                                | 59 (2.1)                        | <10 <sup>6</sup>                                | <10 <sup>6</sup>                               |                                                                                 |
|                                         | Prison 4  | 2,651                                                                                                                                                | 58 (2.2)                        | <10 <sup>6</sup>                                | <10 <sup>6</sup>                               |                                                                                 |
|                                         | Prison 5  | 616                                                                                                                                                  | <10 <sup>6</sup>                | <10 <sup>6</sup>                                | <10 <sup>6</sup>                               |                                                                                 |
|                                         | Prison 6  | 1,533                                                                                                                                                | <10 <sup>6</sup>                | <10 <sup>6</sup>                                | <10 <sup>6</sup>                               |                                                                                 |
|                                         | Prison 7  | 860                                                                                                                                                  | 25 (2.9)                        | <10 <sup>6</sup>                                | <10 <sup>6</sup>                               |                                                                                 |
|                                         | Prison 8  | 1,385                                                                                                                                                | 34 (2.5)                        | <10 <sup>6</sup>                                | <10 <sup>6</sup>                               |                                                                                 |
|                                         | Prison 9  | 1,092                                                                                                                                                | 21 (1.9)                        | <10 <sup>6</sup>                                | <10 <sup>6</sup>                               |                                                                                 |
|                                         | Prison 10 | 3,577                                                                                                                                                | 51 (1.4)                        | <10 <sup>6</sup>                                | <10 <sup>6</sup>                               |                                                                                 |
|                                         | Prison 11 | 5,348                                                                                                                                                | 85 (1.6)                        | <10 <sup>6</sup>                                | <10 <sup>6</sup>                               |                                                                                 |
|                                         | Prison 12 | 805                                                                                                                                                  | <10 <sup>6</sup>                | <10 <sup>6</sup>                                | <10 <sup>6</sup>                               |                                                                                 |
|                                         | Prison 13 | 746                                                                                                                                                  | <10 <sup>6</sup>                | <10 <sup>6</sup>                                | <10 <sup>6</sup>                               |                                                                                 |
| <b>Prison category</b>                  |           |                                                                                                                                                      |                                 |                                                 |                                                |                                                                                 |
| 2017/18                                 | A         | 1,664                                                                                                                                                | 25 (1.5)                        | <10 <sup>6</sup>                                | <10 <sup>6</sup>                               |                                                                                 |
|                                         | B         | 9,254                                                                                                                                                | 123 (1.3)                       | <10 <sup>6</sup>                                | <10 <sup>6</sup>                               |                                                                                 |
|                                         | C         | 6,035                                                                                                                                                | 84 (1.4)                        | <10 <sup>6</sup>                                | <10 <sup>6</sup>                               |                                                                                 |
|                                         | Closed    | 1,720                                                                                                                                                | 40 (2.3)                        | <10 <sup>6</sup>                                | <10 <sup>6</sup>                               |                                                                                 |
|                                         | D         | 2,189                                                                                                                                                | 11 (0.5)                        | <10 <sup>6</sup>                                | <10 <sup>6</sup>                               |                                                                                 |
| 2018/19                                 | YOI       | 815                                                                                                                                                  | <10 <sup>6</sup>                | <10 <sup>6</sup>                                | <10 <sup>6</sup>                               |                                                                                 |
|                                         | A         | 1,670                                                                                                                                                | 22 (1.3)                        | <10 <sup>6</sup>                                | <10 <sup>6</sup>                               |                                                                                 |
|                                         | B         | 9,442                                                                                                                                                | 123 (1.3)                       | <10 <sup>6</sup>                                | <10 <sup>6</sup>                               |                                                                                 |
|                                         | C         | 6,204                                                                                                                                                | 97 (1.6)                        | <10 <sup>6</sup>                                | <10 <sup>6</sup>                               |                                                                                 |
|                                         | Closed    | 1,802                                                                                                                                                | 45 (2.5)                        | <10 <sup>6</sup>                                | <10 <sup>6</sup>                               |                                                                                 |
| 2019/20                                 | D         | 2,189                                                                                                                                                | <10 <sup>6</sup>                | <10 <sup>6</sup>                                | <10 <sup>6</sup>                               |                                                                                 |
|                                         | YOI       | 792                                                                                                                                                  | <10 <sup>6</sup>                | <10 <sup>6</sup>                                | <10 <sup>6</sup>                               |                                                                                 |
|                                         | A         | 1,838                                                                                                                                                | 28 (1.5)                        | <10 <sup>6</sup>                                | <10 <sup>6</sup>                               |                                                                                 |
|                                         | B         | 11,904                                                                                                                                               | 178 (1.5)                       | <10 <sup>6</sup>                                | <10 <sup>6</sup>                               |                                                                                 |
|                                         | C         | 6,870                                                                                                                                                | 137 (2.0)                       | <10 <sup>6</sup>                                | <10 <sup>6</sup>                               |                                                                                 |
|                                         | Closed    | 2,245                                                                                                                                                | 59 (2.6)                        | <10 <sup>6</sup>                                | <10 <sup>6</sup>                               |                                                                                 |
|                                         | D         | 2,149                                                                                                                                                | 11 (0.5)                        | <10 <sup>6</sup>                                | <10 <sup>6</sup>                               |                                                                                 |
|                                         | YOI       | 805                                                                                                                                                  | <10 <sup>6</sup>                | <10 <sup>6</sup>                                | <10 <sup>6</sup>                               |                                                                                 |

<sup>1</sup>Eligible for indicator; <sup>2</sup>Achieve in current prison; <sup>3</sup>Achieve in previous prison; <sup>4</sup>Overall achievement - either current or previous prison; <sup>5</sup>Declined indicator; <sup>6</sup>Suppressed (<10) to avoid disclosure

| Indicator                               |                                | The proportion of people on drug treatment for epilepsy who have had an annual review and recorded as seizure free in the preceding 12 months |                                 |                                                 |                                                |  | no comparable data in QOF 2019/20. Most recent QOF was 2013/14 which was 57.50% |
|-----------------------------------------|--------------------------------|-----------------------------------------------------------------------------------------------------------------------------------------------|---------------------------------|-------------------------------------------------|------------------------------------------------|--|---------------------------------------------------------------------------------|
| Group: Diabetes, Asthma & Epilepsy Care |                                |                                                                                                                                               |                                 |                                                 |                                                |  |                                                                                 |
|                                         | Variable                       | Population                                                                                                                                    | Eligible <sup>1</sup> (% popln) | Satisfy Annual Review <sup>4</sup> (% eligible) | Satisfy Seizure Free <sup>4</sup> (% eligible) |  |                                                                                 |
| <b>Gender</b>                           |                                |                                                                                                                                               |                                 |                                                 |                                                |  |                                                                                 |
| 2017/18                                 | F                              | 1,699                                                                                                                                         | 40 (2.4)                        | <10 <sup>6</sup>                                | <10 <sup>6</sup>                               |  |                                                                                 |
|                                         | M                              | 19,977                                                                                                                                        | 250 (1.3)                       | <10 <sup>6</sup>                                | <10 <sup>6</sup>                               |  |                                                                                 |
| 2018/19                                 | F                              | 1,802                                                                                                                                         | 45 (2.5)                        | <10 <sup>6</sup>                                | <10 <sup>6</sup>                               |  |                                                                                 |
|                                         | M                              | 20,295                                                                                                                                        | 255 (1.3)                       | 13 (5.1)                                        | <10 <sup>6</sup>                               |  |                                                                                 |
| 2019/20                                 | F                              | 1,376                                                                                                                                         | 34 (2.5)                        | <10 <sup>6</sup>                                | <10 <sup>6</sup>                               |  |                                                                                 |
|                                         | M                              | 23,570                                                                                                                                        | 360 (1.5)                       | <10 <sup>6</sup>                                | <10 <sup>6</sup>                               |  |                                                                                 |
| <b>Sentence Status</b>                  |                                |                                                                                                                                               |                                 |                                                 |                                                |  |                                                                                 |
| 2017/18                                 | .                              | 81                                                                                                                                            | <10 <sup>6</sup>                | <10 <sup>6</sup>                                | <10 <sup>6</sup>                               |  |                                                                                 |
|                                         | Absconded                      | <10 <sup>9</sup>                                                                                                                              | <10 <sup>6</sup>                | <10 <sup>6</sup>                                | <10 <sup>6</sup>                               |  |                                                                                 |
|                                         | Active In                      | 15,872                                                                                                                                        | 227 (1.4)                       | <10 <sup>6</sup>                                | <10 <sup>6</sup>                               |  |                                                                                 |
|                                         | Active Out                     | 1,052                                                                                                                                         | 12 (1.1)                        | <10 <sup>6</sup>                                | <10 <sup>6</sup>                               |  |                                                                                 |
|                                         | Convicted Sentence             | 2,125                                                                                                                                         | 29 (1.4)                        | <10 <sup>6</sup>                                | <10 <sup>6</sup>                               |  |                                                                                 |
|                                         | Downgrade in security category | <10 <sup>9</sup>                                                                                                                              | <10 <sup>6</sup>                | <10 <sup>6</sup>                                | <10 <sup>6</sup>                               |  |                                                                                 |
|                                         | Internal Cell Move             | <10 <sup>9</sup>                                                                                                                              | <10 <sup>6</sup>                | <10 <sup>6</sup>                                | <10 <sup>6</sup>                               |  |                                                                                 |
|                                         | Judges Remand                  | 92                                                                                                                                            | <10 <sup>6</sup>                | <10 <sup>6</sup>                                | <10 <sup>6</sup>                               |  |                                                                                 |
|                                         | Licence Revoke                 | 52                                                                                                                                            | <10 <sup>6</sup>                | <10 <sup>6</sup>                                | <10 <sup>6</sup>                               |  |                                                                                 |
|                                         | On Remand                      | 1,492                                                                                                                                         | 16 (1.1)                        | <10 <sup>6</sup>                                | <10 <sup>6</sup>                               |  |                                                                                 |
|                                         | Transfer                       | 910                                                                                                                                           | <10 <sup>6</sup>                | <10 <sup>6</sup>                                | <10 <sup>6</sup>                               |  |                                                                                 |
|                                         | Upgrade in security category   | <10 <sup>9</sup>                                                                                                                              | <10 <sup>6</sup>                | <10 <sup>6</sup>                                | <10 <sup>6</sup>                               |  |                                                                                 |
| 2018/19                                 | .                              | 88                                                                                                                                            | <10 <sup>6</sup>                | <10 <sup>6</sup>                                | <10 <sup>6</sup>                               |  |                                                                                 |
|                                         | Absconded                      | <10 <sup>9</sup>                                                                                                                              | <10 <sup>6</sup>                | <10 <sup>6</sup>                                | <10 <sup>6</sup>                               |  |                                                                                 |
|                                         | Active In                      | 18,145                                                                                                                                        | 259 (1.4)                       | 10 (3.9)                                        | <10 <sup>6</sup>                               |  |                                                                                 |
|                                         | Active Out                     | 835                                                                                                                                           | <10 <sup>6</sup>                | <10 <sup>6</sup>                                | <10 <sup>6</sup>                               |  |                                                                                 |
|                                         | Convicted Sentence             | 1,320                                                                                                                                         | <10 <sup>6</sup>                | <10 <sup>6</sup>                                | <10 <sup>6</sup>                               |  |                                                                                 |
|                                         | Downgrade in security category | <10 <sup>9</sup>                                                                                                                              | <10 <sup>6</sup>                | <10 <sup>6</sup>                                | <10 <sup>6</sup>                               |  |                                                                                 |
|                                         | Internal Cell Move             | <10 <sup>9</sup>                                                                                                                              | <10 <sup>6</sup>                | <10 <sup>6</sup>                                | <10 <sup>6</sup>                               |  |                                                                                 |
|                                         | Judges Remand                  | <10 <sup>9</sup>                                                                                                                              | <10 <sup>6</sup>                | <10 <sup>6</sup>                                | <10 <sup>6</sup>                               |  |                                                                                 |
|                                         | Licence Revoke                 | 125                                                                                                                                           | <10 <sup>6</sup>                | <10 <sup>6</sup>                                | <10 <sup>6</sup>                               |  |                                                                                 |
|                                         | On Remand                      | 1,059                                                                                                                                         | 20 (1.9)                        | <10 <sup>6</sup>                                | <10 <sup>6</sup>                               |  |                                                                                 |
|                                         | Transfer                       | 518                                                                                                                                           | <10 <sup>6</sup>                | <10 <sup>6</sup>                                | <10 <sup>6</sup>                               |  |                                                                                 |
|                                         | Upgrade in security category   | <10 <sup>9</sup>                                                                                                                              | <10 <sup>6</sup>                | <10 <sup>6</sup>                                | <10 <sup>6</sup>                               |  |                                                                                 |
| 2019/20                                 | .                              | 69                                                                                                                                            | <10 <sup>6</sup>                | <10 <sup>6</sup>                                | <10 <sup>6</sup>                               |  |                                                                                 |
|                                         | Absconded                      | <10 <sup>9</sup>                                                                                                                              | <10 <sup>6</sup>                | <10 <sup>6</sup>                                | <10 <sup>6</sup>                               |  |                                                                                 |
|                                         | Active In                      | 22,424                                                                                                                                        | 372 (1.7)                       | <10 <sup>6</sup>                                | <10 <sup>6</sup>                               |  |                                                                                 |
|                                         | Active Out                     | 625                                                                                                                                           | <10 <sup>6</sup>                | <10 <sup>6</sup>                                | <10 <sup>6</sup>                               |  |                                                                                 |
|                                         | Convicted Sentence             | 1,361                                                                                                                                         | 18 (1.3)                        | <10 <sup>6</sup>                                | <10 <sup>6</sup>                               |  |                                                                                 |
|                                         | Downgrade in security category | <10 <sup>9</sup>                                                                                                                              | <10 <sup>6</sup>                | <10 <sup>6</sup>                                | <10 <sup>6</sup>                               |  |                                                                                 |
|                                         | Internal Cell Move             | <10 <sup>9</sup>                                                                                                                              | <10 <sup>6</sup>                | <10 <sup>6</sup>                                | <10 <sup>6</sup>                               |  |                                                                                 |
|                                         | Judges Remand                  | 19                                                                                                                                            | <10 <sup>6</sup>                | <10 <sup>6</sup>                                | <10 <sup>6</sup>                               |  |                                                                                 |
|                                         | Licence Revoke                 | 178                                                                                                                                           | <10 <sup>6</sup>                | <10 <sup>6</sup>                                | <10 <sup>6</sup>                               |  |                                                                                 |
|                                         | On Remand                      | 1,031                                                                                                                                         | 18 (1.7)                        | <10 <sup>6</sup>                                | <10 <sup>6</sup>                               |  |                                                                                 |
|                                         | Transfer                       | 101                                                                                                                                           | <10 <sup>6</sup>                | <10 <sup>6</sup>                                | <10 <sup>6</sup>                               |  |                                                                                 |
|                                         | Upgrade in security category   | <10 <sup>9</sup>                                                                                                                              | <10 <sup>6</sup>                | <10 <sup>6</sup>                                | <10 <sup>6</sup>                               |  |                                                                                 |
| <b>Age - years</b>                      |                                |                                                                                                                                               |                                 |                                                 |                                                |  |                                                                                 |
| 2017/18                                 | 10 - <20                       | 468                                                                                                                                           | <10 <sup>6</sup>                | <10 <sup>6</sup>                                | <10 <sup>6</sup>                               |  |                                                                                 |
|                                         | 20 - <30                       | 6,994                                                                                                                                         | 55 (0.8)                        | <10 <sup>6</sup>                                | <10 <sup>6</sup>                               |  |                                                                                 |
|                                         | 30 - <40                       | 7,051                                                                                                                                         | 96 (1.4)                        | <10 <sup>6</sup>                                | <10 <sup>6</sup>                               |  |                                                                                 |
|                                         | 40 - <50                       | 4,114                                                                                                                                         | 85 (2.1)                        | <10 <sup>6</sup>                                | <10 <sup>6</sup>                               |  |                                                                                 |
|                                         | 50 - <60                       | 2,107                                                                                                                                         | 38 (1.8)                        | <10 <sup>6</sup>                                | <10 <sup>6</sup>                               |  |                                                                                 |
|                                         | 60 - <70                       | 684                                                                                                                                           | 11 (1.6)                        | <10 <sup>6</sup>                                | <10 <sup>6</sup>                               |  |                                                                                 |
|                                         | 70 - <80                       | 213                                                                                                                                           | <10 <sup>6</sup>                | <10 <sup>6</sup>                                | <10 <sup>6</sup>                               |  |                                                                                 |
|                                         | 80 - <90                       | 40                                                                                                                                            | <10 <sup>6</sup>                | <10 <sup>6</sup>                                | <10 <sup>6</sup>                               |  |                                                                                 |
|                                         | 90 - <100                      | <10 <sup>9</sup>                                                                                                                              | <10 <sup>6</sup>                | <10 <sup>6</sup>                                | <10 <sup>6</sup>                               |  |                                                                                 |
|                                         | 100 - <110                     | <10 <sup>9</sup>                                                                                                                              | <10 <sup>6</sup>                | <10 <sup>6</sup>                                | <10 <sup>6</sup>                               |  |                                                                                 |
| 2018/19                                 | 10 - <20                       | 436                                                                                                                                           | <10 <sup>6</sup>                | <10 <sup>6</sup>                                | <10 <sup>6</sup>                               |  |                                                                                 |
|                                         | 20 - <30                       | 7,163                                                                                                                                         | 72 (1.0)                        | <10 <sup>6</sup>                                | <10 <sup>6</sup>                               |  |                                                                                 |
|                                         | 30 - <40                       | 7,381                                                                                                                                         | 104 (1.4)                       | <10 <sup>6</sup>                                | <10 <sup>6</sup>                               |  |                                                                                 |
|                                         | 40 - <50                       | 4,180                                                                                                                                         | 72 (1.7)                        | <10 <sup>6</sup>                                | <10 <sup>6</sup>                               |  |                                                                                 |
|                                         | 50 - <60                       | 1,978                                                                                                                                         | 30 (1.5)                        | <10 <sup>6</sup>                                | <10 <sup>6</sup>                               |  |                                                                                 |
|                                         | 60 - <70                       | 701                                                                                                                                           | 18 (2.6)                        | <10 <sup>6</sup>                                | <10 <sup>6</sup>                               |  |                                                                                 |
|                                         | 70 - <80                       | 209                                                                                                                                           | <10 <sup>6</sup>                | <10 <sup>6</sup>                                | <10 <sup>6</sup>                               |  |                                                                                 |
|                                         | 80 - <90                       | 45                                                                                                                                            | <10 <sup>6</sup>                | <10 <sup>6</sup>                                | <10 <sup>6</sup>                               |  |                                                                                 |
|                                         | 90 - <100                      | <10 <sup>9</sup>                                                                                                                              | <10 <sup>6</sup>                | <10 <sup>6</sup>                                | <10 <sup>6</sup>                               |  |                                                                                 |
|                                         | 100 - <110                     | <10 <sup>9</sup>                                                                                                                              | <10 <sup>6</sup>                | <10 <sup>6</sup>                                | <10 <sup>6</sup>                               |  |                                                                                 |

<sup>1</sup>Eligible for indicator; <sup>2</sup>Achieve in current prison; <sup>3</sup>Achieve in previous prison; <sup>4</sup>Overall achievement - either current or previous prison; <sup>5</sup>Declined indicator; <sup>6</sup>Suppressed (<10) to avoid disclosure



| Indicator <i>The proportion of people on drug treatment for epilepsy who have had an annual review and recorded as seizure free in the preceding 12 months</i> |                        |                  |                                 |                                                 |                                                | no comparable data in QOF 2019/20. Most recent QOF was 2013/14 which was 57.50% |
|----------------------------------------------------------------------------------------------------------------------------------------------------------------|------------------------|------------------|---------------------------------|-------------------------------------------------|------------------------------------------------|---------------------------------------------------------------------------------|
| Group: Diabetes, Asthma & Epilepsy Care                                                                                                                        |                        |                  |                                 |                                                 |                                                |                                                                                 |
|                                                                                                                                                                | Variable               | Population       | Eligible <sup>1</sup> (% popln) | Satisfy Annual Review <sup>4</sup> (% eligible) | Satisfy Seizure Free <sup>4</sup> (% eligible) |                                                                                 |
| 2019/20                                                                                                                                                        | 10 - <20               | 404              | <10 <sup>6</sup>                | <10 <sup>6</sup>                                | <10 <sup>6</sup>                               |                                                                                 |
|                                                                                                                                                                | 20 - <30               | 8,064            | 85 (1.1)                        | <10 <sup>6</sup>                                | <10 <sup>6</sup>                               |                                                                                 |
|                                                                                                                                                                | 30 - <40               | 9,125            | 151 (1.7)                       | <10 <sup>6</sup>                                | <10 <sup>6</sup>                               |                                                                                 |
|                                                                                                                                                                | 40 - <50               | 4,948            | 131 (2.6)                       | <10 <sup>6</sup>                                | <10 <sup>6</sup>                               |                                                                                 |
|                                                                                                                                                                | 50 - <60               | 2,224            | 32 (1.4)                        | <10 <sup>6</sup>                                | <10 <sup>6</sup>                               |                                                                                 |
|                                                                                                                                                                | 60 - <70               | 751              | 17 (2.3)                        | <10 <sup>6</sup>                                | <10 <sup>6</sup>                               |                                                                                 |
|                                                                                                                                                                | 70 - <80               | 238              | <10 <sup>6</sup>                | <10 <sup>6</sup>                                | <10 <sup>6</sup>                               |                                                                                 |
|                                                                                                                                                                | 80 - <90               | 53               | <10 <sup>6</sup>                | <10 <sup>6</sup>                                | <10 <sup>6</sup>                               |                                                                                 |
|                                                                                                                                                                | 90 - <100              | <10 <sup>0</sup> | <10 <sup>6</sup>                | <10 <sup>6</sup>                                | <10 <sup>6</sup>                               |                                                                                 |
|                                                                                                                                                                | 100 - <110             | <10 <sup>0</sup> | <10 <sup>6</sup>                | <10 <sup>6</sup>                                | <10 <sup>6</sup>                               |                                                                                 |
| <b>Length of Stay (months)</b>                                                                                                                                 |                        |                  |                                 |                                                 |                                                |                                                                                 |
| 2017/18                                                                                                                                                        | <1                     | 4,474            | 55 (1.2)                        | <10 <sup>6</sup>                                | <10 <sup>6</sup>                               |                                                                                 |
|                                                                                                                                                                | 1-<6                   | 8,075            | 104 (1.3)                       | <10 <sup>6</sup>                                | <10 <sup>6</sup>                               |                                                                                 |
|                                                                                                                                                                | 6-<12                  | 3,672            | 51 (1.4)                        | <10 <sup>6</sup>                                | <10 <sup>6</sup>                               |                                                                                 |
|                                                                                                                                                                | 12-<24                 | 2,832            | 36 (1.3)                        | <10 <sup>6</sup>                                | <10 <sup>6</sup>                               |                                                                                 |
|                                                                                                                                                                | 24+                    | 2,624            | 44 (1.7)                        | <10 <sup>6</sup>                                | <10 <sup>6</sup>                               |                                                                                 |
| 2017/18                                                                                                                                                        | <1                     | 4,801            | 56 (1.2)                        | <10 <sup>6</sup>                                | <10 <sup>6</sup>                               |                                                                                 |
|                                                                                                                                                                | 1-<6                   | 7,742            | 87 (1.1)                        | <10 <sup>6</sup>                                | <10 <sup>6</sup>                               |                                                                                 |
|                                                                                                                                                                | 6-<12                  | 3,616            | 63 (1.7)                        | <10 <sup>6</sup>                                | <10 <sup>6</sup>                               |                                                                                 |
|                                                                                                                                                                | 12-<24                 | 3,752            | 62 (1.7)                        | <10 <sup>6</sup>                                | <10 <sup>6</sup>                               |                                                                                 |
|                                                                                                                                                                | 24+                    | 2,188            | 32 (1.5)                        | <10 <sup>6</sup>                                | <10 <sup>6</sup>                               |                                                                                 |
| 2018/19                                                                                                                                                        | <1                     | 5,745            | 85 (1.5)                        | <10 <sup>6</sup>                                | <10 <sup>6</sup>                               |                                                                                 |
|                                                                                                                                                                | 1-<6                   | 9,697            | 138 (1.4)                       | <10 <sup>6</sup>                                | <10 <sup>6</sup>                               |                                                                                 |
|                                                                                                                                                                | 6-<12                  | 5,090            | 97 (1.9)                        | <10 <sup>6</sup>                                | <10 <sup>6</sup>                               |                                                                                 |
|                                                                                                                                                                | 12-<24                 | 3,244            | 63 (1.9)                        | <10 <sup>6</sup>                                | <10 <sup>6</sup>                               |                                                                                 |
|                                                                                                                                                                | 24+                    | 2,035            | 36 (1.8)                        | <10 <sup>6</sup>                                | <10 <sup>6</sup>                               |                                                                                 |
| <b>Ethnic Group</b>                                                                                                                                            |                        |                  |                                 |                                                 |                                                |                                                                                 |
| 2017/18                                                                                                                                                        | White                  | 15,638           | 243 (1.6)                       | <10 <sup>6</sup>                                | <10 <sup>6</sup>                               |                                                                                 |
|                                                                                                                                                                | Mixed                  | 431              | <10 <sup>6</sup>                | <10 <sup>6</sup>                                | <10 <sup>6</sup>                               |                                                                                 |
|                                                                                                                                                                | Asian or Asian British | 813              | <10 <sup>6</sup>                | <10 <sup>6</sup>                                | <10 <sup>6</sup>                               |                                                                                 |
|                                                                                                                                                                | Black or Black British | 404              | <10 <sup>6</sup>                | <10 <sup>6</sup>                                | <10 <sup>6</sup>                               |                                                                                 |
|                                                                                                                                                                | Chinese and Other      | 214              | <10 <sup>6</sup>                | <10 <sup>6</sup>                                | <10 <sup>6</sup>                               |                                                                                 |
|                                                                                                                                                                | Unclassified           | 372              | <10 <sup>6</sup>                | <10 <sup>6</sup>                                | <10 <sup>6</sup>                               |                                                                                 |
|                                                                                                                                                                | 2018/19                | White            | 14,911                          | 242 (1.6)                                       | 12 (5.0)                                       | <10 <sup>6</sup>                                                                |
| Mixed                                                                                                                                                          |                        | 371              | <10 <sup>6</sup>                | <10 <sup>6</sup>                                | <10 <sup>6</sup>                               |                                                                                 |
| Asian or Asian British                                                                                                                                         |                        | 726              | <10 <sup>6</sup>                | <10 <sup>6</sup>                                | <10 <sup>6</sup>                               |                                                                                 |
| Black or Black British                                                                                                                                         |                        | 364              | <10 <sup>6</sup>                | <10 <sup>6</sup>                                | <10 <sup>6</sup>                               |                                                                                 |
| Chinese and Other                                                                                                                                              |                        | 167              | <10 <sup>6</sup>                | <10 <sup>6</sup>                                | <10 <sup>6</sup>                               |                                                                                 |
| Unclassified                                                                                                                                                   |                        | 409              | <10 <sup>6</sup>                | <10 <sup>6</sup>                                | <10 <sup>6</sup>                               |                                                                                 |
| 2019/20                                                                                                                                                        |                        | White            | 16,606                          | 325 (2.0)                                       | <10 <sup>6</sup>                               | <10 <sup>6</sup>                                                                |
|                                                                                                                                                                | Mixed                  | 409              | <10 <sup>6</sup>                | <10 <sup>6</sup>                                | <10 <sup>6</sup>                               |                                                                                 |
|                                                                                                                                                                | Asian or Asian British | 755              | <10 <sup>6</sup>                | <10 <sup>6</sup>                                | <10 <sup>6</sup>                               |                                                                                 |
|                                                                                                                                                                | Black or Black British | 451              | <10 <sup>6</sup>                | <10 <sup>6</sup>                                | <10 <sup>6</sup>                               |                                                                                 |
|                                                                                                                                                                | Chinese and Other      | 163              | <10 <sup>6</sup>                | <10 <sup>6</sup>                                | <10 <sup>6</sup>                               |                                                                                 |
|                                                                                                                                                                | Unclassified           | 387              | <10 <sup>6</sup>                | <10 <sup>6</sup>                                | <10 <sup>6</sup>                               |                                                                                 |

<sup>1</sup>Eligible for indicator; <sup>2</sup>Achieve in current prison; <sup>3</sup>Achieve in previous prison; <sup>4</sup>Overall achievement - either current or previous prison; <sup>5</sup>Declined indicator; <sup>6</sup>Suppressed (<10) to avoid disclosure

The proportion of people with transient ischaemic attack or stroke, excluding those with haemorrhagic stroke, who have been prescribed an antiplatelet or anticoagulant in the preceding 12 months

Community achievement 2019/20: 91.01% (QOF 19/20)

| Indicator              |            | Group: Cardiovascular Disease   |                                   |                                     |                                   |           |
|------------------------|------------|---------------------------------|-----------------------------------|-------------------------------------|-----------------------------------|-----------|
| Variable               | Population | Eligible <sup>1</sup> (% popln) | Satisfy <sup>2</sup> (% eligible) | Elsewhere <sup>3</sup> (% eligible) | Achieve <sup>4</sup> (% eligible) |           |
| <b>Year</b>            |            |                                 |                                   |                                     |                                   |           |
| 2017/18                |            | 21,677                          | 72 (0.3)                          | 50 (69.4)                           | <10 <sup>6</sup>                  | 51 (70.8) |
| 2018/19                |            | 22,099                          | 73 (0.3)                          | 49 (67.1)                           | <10 <sup>6</sup>                  | 50 (68.5) |
| 2019/20                |            | 25,811                          | 86 (0.3)                          | 51 (59.3)                           | <10 <sup>6</sup>                  | 51 (59.3) |
| <b>Prison</b>          |            |                                 |                                   |                                     |                                   |           |
| 2017/18                |            |                                 |                                   |                                     |                                   |           |
| Prison 1               | 1,323      | <10 <sup>6</sup>                | <10 <sup>6</sup>                  | <10 <sup>6</sup>                    | <10 <sup>6</sup>                  |           |
| Prison 2               | 3,261      | <10 <sup>6</sup>                | <10 <sup>6</sup>                  | <10 <sup>6</sup>                    | <10 <sup>6</sup>                  |           |
| Prison 3               | 2,623      | 13 (0.5)                        | 10 (76.9)                         | <10 <sup>6</sup>                    | 10 (76.9)                         |           |
| Prison 4               | 2,089      | 11 (0.5)                        | <10 <sup>6</sup>                  | <10 <sup>6</sup>                    | 10 (90.9)                         |           |
| Prison 5               | 637        | <10 <sup>6</sup>                | <10 <sup>6</sup>                  | <10 <sup>6</sup>                    | <10 <sup>6</sup>                  |           |
| Prison 6               | 1,552      | <10 <sup>6</sup>                | <10 <sup>6</sup>                  | <10 <sup>6</sup>                    | <10 <sup>6</sup>                  |           |
| Prison 7               | 635        | <10 <sup>6</sup>                | <10 <sup>6</sup>                  | <10 <sup>6</sup>                    | <10 <sup>6</sup>                  |           |
| Prison 8               | 1,085      | <10 <sup>6</sup>                | <10 <sup>6</sup>                  | <10 <sup>6</sup>                    | <10 <sup>6</sup>                  |           |
| Prison 9               | 981        | <10 <sup>6</sup>                | <10 <sup>6</sup>                  | <10 <sup>6</sup>                    | <10 <sup>6</sup>                  |           |
| Prison 10              | 2,523      | <10 <sup>6</sup>                | <10 <sup>6</sup>                  | <10 <sup>6</sup>                    | <10 <sup>6</sup>                  |           |
| Prison 11              | 3,470      | <10 <sup>6</sup>                | <10 <sup>6</sup>                  | <10 <sup>6</sup>                    | <10 <sup>6</sup>                  |           |
| Prison 12              | 815        | <10 <sup>6</sup>                | <10 <sup>6</sup>                  | <10 <sup>6</sup>                    | <10 <sup>6</sup>                  |           |
| Prison 13              | 683        | <10 <sup>6</sup>                | <10 <sup>6</sup>                  | <10 <sup>6</sup>                    | <10 <sup>6</sup>                  |           |
| 2018/19                |            |                                 |                                   |                                     |                                   |           |
| Prison 1               | 1,333      | <10 <sup>6</sup>                | <10 <sup>6</sup>                  | <10 <sup>6</sup>                    | <10 <sup>6</sup>                  |           |
| Prison 2               | 2,705      | <10 <sup>6</sup>                | <10 <sup>6</sup>                  | <10 <sup>6</sup>                    | <10 <sup>6</sup>                  |           |
| Prison 3               | 2,522      | <10 <sup>6</sup>                | <10 <sup>6</sup>                  | <10 <sup>6</sup>                    | <10 <sup>6</sup>                  |           |
| Prison 4               | 2,349      | 14 (0.6)                        | 11 (78.6)                         | <10 <sup>6</sup>                    | 11 (78.6)                         |           |
| Prison 5               | 676        | <10 <sup>6</sup>                | <10 <sup>6</sup>                  | <10 <sup>6</sup>                    | <10 <sup>6</sup>                  |           |
| Prison 6               | 1,513      | <10 <sup>6</sup>                | <10 <sup>6</sup>                  | <10 <sup>6</sup>                    | <10 <sup>6</sup>                  |           |
| Prison 7               | 654        | <10 <sup>6</sup>                | <10 <sup>6</sup>                  | <10 <sup>6</sup>                    | <10 <sup>6</sup>                  |           |
| Prison 8               | 1,148      | <10 <sup>6</sup>                | <10 <sup>6</sup>                  | <10 <sup>6</sup>                    | <10 <sup>6</sup>                  |           |
| Prison 9               | 996        | 13 (1.3)                        | <10 <sup>6</sup>                  | <10 <sup>6</sup>                    | <10 <sup>6</sup>                  |           |
| Prison 10              | 2,717      | <10 <sup>6</sup>                | <10 <sup>6</sup>                  | <10 <sup>6</sup>                    | <10 <sup>6</sup>                  |           |
| Prison 11              | 4,020      | <10 <sup>6</sup>                | <10 <sup>6</sup>                  | <10 <sup>6</sup>                    | <10 <sup>6</sup>                  |           |
| Prison 12              | 792        | <10 <sup>6</sup>                | <10 <sup>6</sup>                  | <10 <sup>6</sup>                    | <10 <sup>6</sup>                  |           |
| Prison 13              | 674        | <10 <sup>6</sup>                | <10 <sup>6</sup>                  | <10 <sup>6</sup>                    | <10 <sup>6</sup>                  |           |
| 2019/20                |            |                                 |                                   |                                     |                                   |           |
| Prison 1               | 1,410      | <10 <sup>6</sup>                | <10 <sup>6</sup>                  | <10 <sup>6</sup>                    | <10 <sup>6</sup>                  |           |
| Prison 2               | 2,979      | <10 <sup>6</sup>                | <10 <sup>6</sup>                  | <10 <sup>6</sup>                    | <10 <sup>6</sup>                  |           |
| Prison 3               | 2,809      | 10 (0.4)                        | <10 <sup>6</sup>                  | <10 <sup>6</sup>                    | <10 <sup>6</sup>                  |           |
| Prison 4               | 2,651      | 19 (0.7)                        | 15 (78.9)                         | <10 <sup>6</sup>                    | 15 (78.9)                         |           |
| Prison 5               | 616        | <10 <sup>6</sup>                | <10 <sup>6</sup>                  | <10 <sup>6</sup>                    | <10 <sup>6</sup>                  |           |
| Prison 6               | 1,533      | <10 <sup>6</sup>                | <10 <sup>6</sup>                  | <10 <sup>6</sup>                    | <10 <sup>6</sup>                  |           |
| Prison 7               | 860        | <10 <sup>6</sup>                | <10 <sup>6</sup>                  | <10 <sup>6</sup>                    | <10 <sup>6</sup>                  |           |
| Prison 8               | 1,385      | <10 <sup>6</sup>                | <10 <sup>6</sup>                  | <10 <sup>6</sup>                    | <10 <sup>6</sup>                  |           |
| Prison 9               | 1,092      | 21 (1.9)                        | <10 <sup>6</sup>                  | <10 <sup>6</sup>                    | <10 <sup>6</sup>                  |           |
| Prison 10              | 3,577      | <10 <sup>6</sup>                | <10 <sup>6</sup>                  | <10 <sup>6</sup>                    | <10 <sup>6</sup>                  |           |
| Prison 11              | 5,348      | <10 <sup>6</sup>                | <10 <sup>6</sup>                  | <10 <sup>6</sup>                    | <10 <sup>6</sup>                  |           |
| Prison 12              | 805        | <10 <sup>6</sup>                | <10 <sup>6</sup>                  | <10 <sup>6</sup>                    | <10 <sup>6</sup>                  |           |
| Prison 13              | 746        | <10 <sup>6</sup>                | <10 <sup>6</sup>                  | <10 <sup>6</sup>                    | <10 <sup>6</sup>                  |           |
| <b>Prison category</b> |            |                                 |                                   |                                     |                                   |           |
| 2017/18                |            |                                 |                                   |                                     |                                   |           |
| A                      | 1,664      | 15 (0.9)                        | <10 <sup>6</sup>                  | <10 <sup>6</sup>                    | <10 <sup>6</sup>                  |           |
| B                      | 9,254      | 16 (0.2)                        | 12 (75.0)                         | <10 <sup>6</sup>                    | 12 (75.0)                         |           |
| C                      | 6,035      | 28 (0.5)                        | 22 (78.6)                         | <10 <sup>6</sup>                    | 23 (82.1)                         |           |
| Closed                 | 1,720      | <10 <sup>6</sup>                | <10 <sup>6</sup>                  | <10 <sup>6</sup>                    | <10 <sup>6</sup>                  |           |
| D                      | 2,189      | 10 (0.5)                        | <10 <sup>6</sup>                  | <10 <sup>6</sup>                    | <10 <sup>6</sup>                  |           |
| YOI                    | 815        | <10 <sup>6</sup>                | <10 <sup>6</sup>                  | <10 <sup>6</sup>                    | <10 <sup>6</sup>                  |           |
| 2018/19                |            |                                 |                                   |                                     |                                   |           |
| A                      | 1,670      | 22 (1.3)                        | <10 <sup>6</sup>                  | <10 <sup>6</sup>                    | <10 <sup>6</sup>                  |           |
| B                      | 9,442      | 15 (0.2)                        | 13 (86.7)                         | <10 <sup>6</sup>                    | 14 (93.3)                         |           |
| C                      | 6,204      | 24 (0.4)                        | 19 (79.2)                         | <10 <sup>6</sup>                    | 19 (79.2)                         |           |
| Closed                 | 1,802      | <10 <sup>6</sup>                | <10 <sup>6</sup>                  | <10 <sup>6</sup>                    | <10 <sup>6</sup>                  |           |
| D                      | 2,189      | <10 <sup>6</sup>                | <10 <sup>6</sup>                  | <10 <sup>6</sup>                    | <10 <sup>6</sup>                  |           |
| YOI                    | 792        | <10 <sup>6</sup>                | <10 <sup>6</sup>                  | <10 <sup>6</sup>                    | <10 <sup>6</sup>                  |           |
| 2019/20                |            |                                 |                                   |                                     |                                   |           |
| A                      | 1,838      | 30 (1.6)                        | <10 <sup>6</sup>                  | <10 <sup>6</sup>                    | <10 <sup>6</sup>                  |           |
| B                      | 11,904     | 13 (0.1)                        | 12 (92.3)                         | <10 <sup>6</sup>                    | 12 (92.3)                         |           |
| C                      | 6,870      | 33 (0.5)                        | 24 (72.7)                         | <10 <sup>6</sup>                    | 24 (72.7)                         |           |
| Closed                 | 2,245      | <10 <sup>6</sup>                | <10 <sup>6</sup>                  | <10 <sup>6</sup>                    | <10 <sup>6</sup>                  |           |
| D                      | 2,149      | <10 <sup>6</sup>                | <10 <sup>6</sup>                  | <10 <sup>6</sup>                    | <10 <sup>6</sup>                  |           |
| YOI                    | 805        | <10 <sup>6</sup>                | <10 <sup>6</sup>                  | <10 <sup>6</sup>                    | <10 <sup>6</sup>                  |           |
| <b>Gender</b>          |            |                                 |                                   |                                     |                                   |           |
| 2017/18                |            |                                 |                                   |                                     |                                   |           |
| F                      | 1,699      | <10 <sup>6</sup>                | <10 <sup>6</sup>                  | <10 <sup>6</sup>                    | <10 <sup>6</sup>                  |           |
| M                      | 19,977     | 69 (0.3)                        | 49 (71.0)                         | <10 <sup>6</sup>                    | 50 (72.5)                         |           |
| 2018/19                |            |                                 |                                   |                                     |                                   |           |
| F                      | 1,802      | <10 <sup>6</sup>                | <10 <sup>6</sup>                  | <10 <sup>6</sup>                    | <10 <sup>6</sup>                  |           |
| M                      | 20,295     | 69 (0.3)                        | 46 (66.7)                         | <10 <sup>6</sup>                    | 47 (68.1)                         |           |
| 2019/20                |            |                                 |                                   |                                     |                                   |           |
| F                      | 1,376      | <10 <sup>6</sup>                | <10 <sup>6</sup>                  | <10 <sup>6</sup>                    | <10 <sup>6</sup>                  |           |
| M                      | 23,570     | 81 (0.3)                        | 48 (59.3)                         | <10 <sup>6</sup>                    | 48 (59.3)                         |           |

<sup>1</sup>Eligible for indicator; <sup>2</sup>Achieve in current prison; <sup>3</sup>Achieve in previous prison; <sup>4</sup>Overall achievement - either current or previous prison; <sup>5</sup>Declined indicator; <sup>6</sup>Suppressed (<10) to avoid disclosure

The proportion of people with transient ischaemic attack or stroke, excluding those with haemorrhagic stroke, who have been prescribed an antiplatelet or anticoagulant in the preceding 12 months

Community achievement 2019/20: 91.01% (QOF 19/20)

Indicator Group: Cardiovascular Disease

| Variable                       | Population       | Eligible <sup>1</sup> (% popln) | Satisfy <sup>2</sup> (% eligible) | Elsewhere <sup>3</sup> (% eligible) | Achieve <sup>4</sup> (% eligible) |
|--------------------------------|------------------|---------------------------------|-----------------------------------|-------------------------------------|-----------------------------------|
| <b>Sentence Status</b>         |                  |                                 |                                   |                                     |                                   |
| 2017/18                        | .                | 81                              | <10 <sup>6</sup>                  | <10 <sup>6</sup>                    | <10 <sup>6</sup>                  |
| Absconded                      | <10 <sup>6</sup> | <10 <sup>6</sup>                | <10 <sup>6</sup>                  | <10 <sup>6</sup>                    | <10 <sup>6</sup>                  |
| Active In                      | 15,872           | 57 (0.4)                        | 39 (68.4)                         | <10 <sup>6</sup>                    | 40 (70.2)                         |
| Active Out                     | 1,052            | <10 <sup>6</sup>                | <10 <sup>6</sup>                  | <10 <sup>6</sup>                    | <10 <sup>6</sup>                  |
| Convicted Sentence             | 2,125            | <10 <sup>6</sup>                | <10 <sup>6</sup>                  | <10 <sup>6</sup>                    | <10 <sup>6</sup>                  |
| Downgrade in security category | <10 <sup>6</sup> | <10 <sup>6</sup>                | <10 <sup>6</sup>                  | <10 <sup>6</sup>                    | <10 <sup>6</sup>                  |
| Internal Cell Move             | <10 <sup>6</sup> | <10 <sup>6</sup>                | <10 <sup>6</sup>                  | <10 <sup>6</sup>                    | <10 <sup>6</sup>                  |
| Judges Remand                  | 92               | <10 <sup>6</sup>                | <10 <sup>6</sup>                  | <10 <sup>6</sup>                    | <10 <sup>6</sup>                  |
| Licence Revoke                 | 52               | <10 <sup>6</sup>                | <10 <sup>6</sup>                  | <10 <sup>6</sup>                    | <10 <sup>6</sup>                  |
| On Remand                      | 1,492            | <10 <sup>6</sup>                | <10 <sup>6</sup>                  | <10 <sup>6</sup>                    | <10 <sup>6</sup>                  |
| Transfer                       | 910              | <10 <sup>6</sup>                | <10 <sup>6</sup>                  | <10 <sup>6</sup>                    | <10 <sup>6</sup>                  |
| Upgrade in security category   | <10 <sup>6</sup> | <10 <sup>6</sup>                | <10 <sup>6</sup>                  | <10 <sup>6</sup>                    | <10 <sup>6</sup>                  |
| 2018/19                        | .                | 88                              | <10 <sup>6</sup>                  | <10 <sup>6</sup>                    | <10 <sup>6</sup>                  |
| Absconded                      | <10 <sup>6</sup> | <10 <sup>6</sup>                | <10 <sup>6</sup>                  | <10 <sup>6</sup>                    | <10 <sup>6</sup>                  |
| Active In                      | 18,145           | 66 (0.4)                        | 43 (65.2)                         | <10 <sup>6</sup>                    | 44 (66.7)                         |
| Active Out                     | 835              | <10 <sup>6</sup>                | <10 <sup>6</sup>                  | <10 <sup>6</sup>                    | <10 <sup>6</sup>                  |
| Convicted Sentence             | 1,320            | <10 <sup>6</sup>                | <10 <sup>6</sup>                  | <10 <sup>6</sup>                    | <10 <sup>6</sup>                  |
| Downgrade in security category | <10 <sup>6</sup> | <10 <sup>6</sup>                | <10 <sup>6</sup>                  | <10 <sup>6</sup>                    | <10 <sup>6</sup>                  |
| Internal Cell Move             | <10 <sup>6</sup> | <10 <sup>6</sup>                | <10 <sup>6</sup>                  | <10 <sup>6</sup>                    | <10 <sup>6</sup>                  |
| Judges Remand                  | <10 <sup>6</sup> | <10 <sup>6</sup>                | <10 <sup>6</sup>                  | <10 <sup>6</sup>                    | <10 <sup>6</sup>                  |
| Licence Revoke                 | 125              | <10 <sup>6</sup>                | <10 <sup>6</sup>                  | <10 <sup>6</sup>                    | <10 <sup>6</sup>                  |
| On Remand                      | 1,059            | <10 <sup>6</sup>                | <10 <sup>6</sup>                  | <10 <sup>6</sup>                    | <10 <sup>6</sup>                  |
| Transfer                       | 518              | <10 <sup>6</sup>                | <10 <sup>6</sup>                  | <10 <sup>6</sup>                    | <10 <sup>6</sup>                  |
| Upgrade in security category   | <10 <sup>6</sup> | <10 <sup>6</sup>                | <10 <sup>6</sup>                  | <10 <sup>6</sup>                    | <10 <sup>6</sup>                  |
| 2019/20                        | .                | 69                              | <10 <sup>6</sup>                  | <10 <sup>6</sup>                    | <10 <sup>6</sup>                  |
| Absconded                      | <10 <sup>6</sup> | <10 <sup>6</sup>                | <10 <sup>6</sup>                  | <10 <sup>6</sup>                    | <10 <sup>6</sup>                  |
| Active In                      | 22,424           | 83 (0.4)                        | 49 (59.0)                         | <10 <sup>6</sup>                    | 49 (59.0)                         |
| Active Out                     | 625              | <10 <sup>6</sup>                | <10 <sup>6</sup>                  | <10 <sup>6</sup>                    | <10 <sup>6</sup>                  |
| Convicted Sentence             | 1,361            | <10 <sup>6</sup>                | <10 <sup>6</sup>                  | <10 <sup>6</sup>                    | <10 <sup>6</sup>                  |
| Downgrade in security category | <10 <sup>6</sup> | <10 <sup>6</sup>                | <10 <sup>6</sup>                  | <10 <sup>6</sup>                    | <10 <sup>6</sup>                  |
| Internal Cell Move             | <10 <sup>6</sup> | <10 <sup>6</sup>                | <10 <sup>6</sup>                  | <10 <sup>6</sup>                    | <10 <sup>6</sup>                  |
| Judges Remand                  | 19               | <10 <sup>6</sup>                | <10 <sup>6</sup>                  | <10 <sup>6</sup>                    | <10 <sup>6</sup>                  |
| Licence Revoke                 | 178              | <10 <sup>6</sup>                | <10 <sup>6</sup>                  | <10 <sup>6</sup>                    | <10 <sup>6</sup>                  |
| On Remand                      | 1,031            | <10 <sup>6</sup>                | <10 <sup>6</sup>                  | <10 <sup>6</sup>                    | <10 <sup>6</sup>                  |
| Transfer                       | 101              | <10 <sup>6</sup>                | <10 <sup>6</sup>                  | <10 <sup>6</sup>                    | <10 <sup>6</sup>                  |
| Upgrade in security category   | <10 <sup>6</sup> | <10 <sup>6</sup>                | <10 <sup>6</sup>                  | <10 <sup>6</sup>                    | <10 <sup>6</sup>                  |
| <b>Age - years</b>             |                  |                                 |                                   |                                     |                                   |
| 2017/18                        | 10 - <20         | 468                             | <10 <sup>6</sup>                  | <10 <sup>6</sup>                    | <10 <sup>6</sup>                  |
|                                | 20 - <30         | 6,994                           | <10 <sup>6</sup>                  | <10 <sup>6</sup>                    | <10 <sup>6</sup>                  |
|                                | 30 - <40         | 7,051                           | <10 <sup>6</sup>                  | <10 <sup>6</sup>                    | <10 <sup>6</sup>                  |
|                                | 40 - <50         | 4,114                           | <10 <sup>6</sup>                  | <10 <sup>6</sup>                    | <10 <sup>6</sup>                  |
|                                | 50 - <60         | 2,107                           | 18 (0.9)                          | 12 (66.7)                           | 12 (66.7)                         |
|                                | 60 - <70         | 684                             | 25 (3.7)                          | 17 (68.0)                           | 17 (68.0)                         |
|                                | 70 - <80         | 213                             | 16 (7.5)                          | 15 (93.8)                           | 15 (93.8)                         |
|                                | 80 - <90         | 40                              | <10 <sup>6</sup>                  | <10 <sup>6</sup>                    | <10 <sup>6</sup>                  |
|                                | 90 - <100        | <10 <sup>6</sup>                | <10 <sup>6</sup>                  | <10 <sup>6</sup>                    | <10 <sup>6</sup>                  |
|                                | 100 - <110       | <10 <sup>6</sup>                | <10 <sup>6</sup>                  | <10 <sup>6</sup>                    | <10 <sup>6</sup>                  |
| 2018/19                        | 10 - <20         | 436                             | <10 <sup>6</sup>                  | <10 <sup>6</sup>                    | <10 <sup>6</sup>                  |
|                                | 20 - <30         | 7,163                           | <10 <sup>6</sup>                  | <10 <sup>6</sup>                    | <10 <sup>6</sup>                  |
|                                | 30 - <40         | 7,381                           | <10 <sup>6</sup>                  | <10 <sup>6</sup>                    | <10 <sup>6</sup>                  |
|                                | 40 - <50         | 4,180                           | <10 <sup>6</sup>                  | <10 <sup>6</sup>                    | <10 <sup>6</sup>                  |
|                                | 50 - <60         | 1,978                           | 22 (1.1)                          | 10 (45.5)                           | 11 (50.0)                         |
|                                | 60 - <70         | 701                             | 24 (3.4)                          | 19 (79.2)                           | 19 (79.2)                         |
|                                | 70 - <80         | 209                             | 15 (7.2)                          | <10 <sup>6</sup>                    | <10 <sup>6</sup>                  |
|                                | 80 - <90         | 45                              | <10 <sup>6</sup>                  | <10 <sup>6</sup>                    | <10 <sup>6</sup>                  |
|                                | 90 - <100        | <10 <sup>6</sup>                | <10 <sup>6</sup>                  | <10 <sup>6</sup>                    | <10 <sup>6</sup>                  |
|                                | 100 - <110       | <10 <sup>6</sup>                | <10 <sup>6</sup>                  | <10 <sup>6</sup>                    | <10 <sup>6</sup>                  |
| 2019/20                        | 10 - <20         | 404                             | <10 <sup>6</sup>                  | <10 <sup>6</sup>                    | <10 <sup>6</sup>                  |
|                                | 20 - <30         | 8,064                           | <10 <sup>6</sup>                  | <10 <sup>6</sup>                    | <10 <sup>6</sup>                  |
|                                | 30 - <40         | 9,125                           | <10 <sup>6</sup>                  | <10 <sup>6</sup>                    | <10 <sup>6</sup>                  |
|                                | 40 - <50         | 4,948                           | <10 <sup>6</sup>                  | <10 <sup>6</sup>                    | <10 <sup>6</sup>                  |
|                                | 50 - <60         | 2,224                           | 23 (1.0)                          | 11 (47.8)                           | 11 (47.8)                         |
|                                | 60 - <70         | 751                             | 27 (3.6)                          | 19 (70.4)                           | 19 (70.4)                         |
|                                | 70 - <80         | 238                             | 16 (6.7)                          | 10 (62.5)                           | 10 (62.5)                         |
|                                | 80 - <90         | 53                              | <10 <sup>6</sup>                  | <10 <sup>6</sup>                    | <10 <sup>6</sup>                  |
|                                | 90 - <100        | <10 <sup>6</sup>                | <10 <sup>6</sup>                  | <10 <sup>6</sup>                    | <10 <sup>6</sup>                  |
|                                | 100 - <110       | <10 <sup>6</sup>                | <10 <sup>6</sup>                  | <10 <sup>6</sup>                    | <10 <sup>6</sup>                  |

<sup>1</sup>Eligible for indicator; <sup>2</sup>Achieve in current prison; <sup>3</sup>Achieve in previous prison; <sup>4</sup>Overall achievement - either current or previous prison; <sup>5</sup>Declined indicator; <sup>6</sup>Suppressed (<10) to avoid disclosure

The proportion of people with transient ischaemic attack or stroke, excluding those with haemorrhagic stroke, who have been prescribed an antiplatelet or anticoagulant in the preceding 12 months

Community achievement 2019/20: 91.01% (QOF 19/20)

| Indicator                      |                        | Group: Cardiovascular Disease   |                                   |                                     |                                   |                  |
|--------------------------------|------------------------|---------------------------------|-----------------------------------|-------------------------------------|-----------------------------------|------------------|
| Variable                       | Population             | Eligible <sup>1</sup> (% popln) | Satisfy <sup>2</sup> (% eligible) | Elsewhere <sup>3</sup> (% eligible) | Achieve <sup>4</sup> (% eligible) |                  |
| <b>Length of Stay (months)</b> |                        |                                 |                                   |                                     |                                   |                  |
| 2017/18                        | <1                     | 4,474                           | <10 <sup>6</sup>                  | <10 <sup>6</sup>                    | <10 <sup>6</sup>                  | <10 <sup>6</sup> |
|                                | 1-<6                   | 8,075                           | 13 (0.2)                          | <10 <sup>6</sup>                    | <10 <sup>6</sup>                  | <10 <sup>6</sup> |
|                                | 6-<12                  | 3,672                           | 11 (0.3)                          | 11 (100.0)                          | <10 <sup>6</sup>                  | 11 (100.0)       |
|                                | 12-<24                 | 2,832                           | 12 (0.4)                          | 12 (100.0)                          | <10 <sup>6</sup>                  | 12 (100.0)       |
|                                | 24+                    | 2,624                           | 29 (1.1)                          | 14 (48.3)                           | <10 <sup>6</sup>                  | 15 (51.7)        |
| 2018/19                        | <1                     | 4,801                           | <10 <sup>6</sup>                  | <10 <sup>6</sup>                    | <10 <sup>6</sup>                  | <10 <sup>6</sup> |
|                                | 1-<6                   | 7,742                           | 11 (0.1)                          | 10 (90.9)                           | <10 <sup>6</sup>                  | 10 (90.9)        |
|                                | 6-<12                  | 3,616                           | <10 <sup>6</sup>                  | <10 <sup>6</sup>                    | <10 <sup>6</sup>                  | <10 <sup>6</sup> |
|                                | 12-<24                 | 3,447                           | 15 (0.4)                          | 11 (73.3)                           | <10 <sup>6</sup>                  | 11 (73.3)        |
|                                | 24+                    | 2,493                           | 38 (1.5)                          | 21 (55.3)                           | <10 <sup>6</sup>                  | 21 (55.3)        |
| 2019/20                        | <1                     | 5,745                           | <10 <sup>6</sup>                  | <10 <sup>6</sup>                    | <10 <sup>6</sup>                  | <10 <sup>6</sup> |
|                                | 1-<6                   | 9,697                           | 17 (0.2)                          | 10 (58.8)                           | <10 <sup>6</sup>                  | 10 (58.8)        |
|                                | 6-<12                  | 5,090                           | 10 (0.2)                          | <10 <sup>6</sup>                    | <10 <sup>6</sup>                  | <10 <sup>6</sup> |
|                                | 12-<24                 | 3,244                           | 15 (0.5)                          | 11 (73.3)                           | <10 <sup>6</sup>                  | 11 (73.3)        |
|                                | 24+                    | 2,035                           | 42 (2.1)                          | 20 (47.6)                           | <10 <sup>6</sup>                  | 20 (47.6)        |
| <b>Ethnic Group</b>            |                        |                                 |                                   |                                     |                                   |                  |
| 2017/18                        | White                  | 15,638                          | 62 (0.4)                          | 43 (69.4)                           | <10 <sup>6</sup>                  | 44 (71.0)        |
|                                | Mixed                  | 431                             | <10 <sup>6</sup>                  | <10 <sup>6</sup>                    | <10 <sup>6</sup>                  | <10 <sup>6</sup> |
|                                | Asian or Asian British | 813                             | <10 <sup>6</sup>                  | <10 <sup>6</sup>                    | <10 <sup>6</sup>                  | <10 <sup>6</sup> |
|                                | Black or Black British | 404                             | <10 <sup>6</sup>                  | <10 <sup>6</sup>                    | <10 <sup>6</sup>                  | <10 <sup>6</sup> |
|                                | Chinese and Other      | 214                             | <10 <sup>6</sup>                  | <10 <sup>6</sup>                    | <10 <sup>6</sup>                  | <10 <sup>6</sup> |
|                                | Unclassified           | 372                             | <10 <sup>6</sup>                  | <10 <sup>6</sup>                    | <10 <sup>6</sup>                  | <10 <sup>6</sup> |
| 2018/19                        | White                  | 14,911                          | 69 (0.5)                          | 46 (66.7)                           | <10 <sup>6</sup>                  | 47 (68.1)        |
|                                | Mixed                  | 371                             | <10 <sup>6</sup>                  | <10 <sup>6</sup>                    | <10 <sup>6</sup>                  | <10 <sup>6</sup> |
|                                | Asian or Asian British | 726                             | <10 <sup>6</sup>                  | <10 <sup>6</sup>                    | <10 <sup>6</sup>                  | <10 <sup>6</sup> |
|                                | Black or Black British | 364                             | <10 <sup>6</sup>                  | <10 <sup>6</sup>                    | <10 <sup>6</sup>                  | <10 <sup>6</sup> |
|                                | Chinese and Other      | 167                             | <10 <sup>6</sup>                  | <10 <sup>6</sup>                    | <10 <sup>6</sup>                  | <10 <sup>6</sup> |
|                                | Unclassified           | 409                             | <10 <sup>6</sup>                  | <10 <sup>6</sup>                    | <10 <sup>6</sup>                  | <10 <sup>6</sup> |
| 2019/20                        | White                  | 16,606                          | 76 (0.5)                          | 46 (60.5)                           | <10 <sup>6</sup>                  | 46 (60.5)        |
|                                | Mixed                  | 409                             | <10 <sup>6</sup>                  | <10 <sup>6</sup>                    | <10 <sup>6</sup>                  | <10 <sup>6</sup> |
|                                | Asian or Asian British | 755                             | <10 <sup>6</sup>                  | <10 <sup>6</sup>                    | <10 <sup>6</sup>                  | <10 <sup>6</sup> |
|                                | Black or Black British | 451                             | <10 <sup>6</sup>                  | <10 <sup>6</sup>                    | <10 <sup>6</sup>                  | <10 <sup>6</sup> |
|                                | Chinese and Other      | 163                             | <10 <sup>6</sup>                  | <10 <sup>6</sup>                    | <10 <sup>6</sup>                  | <10 <sup>6</sup> |
|                                | Unclassified           | 387                             | <10 <sup>6</sup>                  | <10 <sup>6</sup>                    | <10 <sup>6</sup>                  | <10 <sup>6</sup> |

<sup>1</sup>Eligible for indicator; <sup>2</sup>Achieve in current prison; <sup>3</sup>Achieve in previous prison; <sup>4</sup>Overall achievement - either current or previous prison; <sup>5</sup>Declined indicator; <sup>6</sup>Suppressed (<10) to avoid disclosure

| <i>The proportion of people with persistent or paroxysmal atrial fibrillation and a CHA2DS2-VASc score equal to two or more, with a prescription for warfarin or a direct-acting oral anticoagulant in the preceding 12 months</i> |                               |                  |                                 |                                   |                                     |                                   | Community achievement 2019/20: 87.26% (QOF 19/20) |  |
|------------------------------------------------------------------------------------------------------------------------------------------------------------------------------------------------------------------------------------|-------------------------------|------------------|---------------------------------|-----------------------------------|-------------------------------------|-----------------------------------|---------------------------------------------------|--|
| Indicator                                                                                                                                                                                                                          | Group: Cardiovascular Disease | Population       | Eligible <sup>1</sup> (% popln) | Satisfy <sup>2</sup> (% eligible) | Elsewhere <sup>3</sup> (% eligible) | Achieve <sup>4</sup> (% eligible) |                                                   |  |
| Year                                                                                                                                                                                                                               | Variable                      |                  |                                 |                                   |                                     |                                   |                                                   |  |
| Year                                                                                                                                                                                                                               | 2017/18                       | 21,677           | 40 (0.2)                        | 33 (82.5)                         | <10 <sup>6</sup>                    | 34 (85.0)                         |                                                   |  |
|                                                                                                                                                                                                                                    | 2018/19                       | 22,099           | 53 (0.2)                        | 41 (77.4)                         | <10 <sup>6</sup>                    | 41 (77.4)                         |                                                   |  |
|                                                                                                                                                                                                                                    | 2019/20                       | 25,811           | 54 (0.2)                        | 45 (83.3)                         | <10 <sup>6</sup>                    | 45 (83.3)                         |                                                   |  |
| Prison                                                                                                                                                                                                                             | 2017/18                       |                  |                                 |                                   |                                     |                                   |                                                   |  |
|                                                                                                                                                                                                                                    | Prison 1                      | 1,323            | <10 <sup>6</sup>                | <10 <sup>6</sup>                  | <10 <sup>6</sup>                    | <10 <sup>6</sup>                  |                                                   |  |
|                                                                                                                                                                                                                                    | Prison 2                      | 3,261            | <10 <sup>6</sup>                | <10 <sup>6</sup>                  | <10 <sup>6</sup>                    | <10 <sup>6</sup>                  |                                                   |  |
|                                                                                                                                                                                                                                    | Prison 3                      | 2,623            | <10 <sup>6</sup>                | <10 <sup>6</sup>                  | <10 <sup>6</sup>                    | <10 <sup>6</sup>                  |                                                   |  |
|                                                                                                                                                                                                                                    | Prison 4                      | 2,089            | <10 <sup>6</sup>                | <10 <sup>6</sup>                  | <10 <sup>6</sup>                    | <10 <sup>6</sup>                  |                                                   |  |
|                                                                                                                                                                                                                                    | Prison 5                      | 637              | <10 <sup>6</sup>                | <10 <sup>6</sup>                  | <10 <sup>6</sup>                    | <10 <sup>6</sup>                  |                                                   |  |
|                                                                                                                                                                                                                                    | Prison 6                      | 1,552            | <10 <sup>6</sup>                | <10 <sup>6</sup>                  | <10 <sup>6</sup>                    | <10 <sup>6</sup>                  |                                                   |  |
|                                                                                                                                                                                                                                    | Prison 7                      | 635              | <10 <sup>6</sup>                | <10 <sup>6</sup>                  | <10 <sup>6</sup>                    | <10 <sup>6</sup>                  |                                                   |  |
|                                                                                                                                                                                                                                    | Prison 8                      | 1,085            | <10 <sup>6</sup>                | <10 <sup>6</sup>                  | <10 <sup>6</sup>                    | <10 <sup>6</sup>                  |                                                   |  |
|                                                                                                                                                                                                                                    | Prison 9                      | 981              | <10 <sup>6</sup>                | <10 <sup>6</sup>                  | <10 <sup>6</sup>                    | <10 <sup>6</sup>                  |                                                   |  |
|                                                                                                                                                                                                                                    | Prison 10                     | 2,523            | <10 <sup>6</sup>                | <10 <sup>6</sup>                  | <10 <sup>6</sup>                    | <10 <sup>6</sup>                  |                                                   |  |
|                                                                                                                                                                                                                                    | Prison 11                     | 3,470            | <10 <sup>6</sup>                | <10 <sup>6</sup>                  | <10 <sup>6</sup>                    | <10 <sup>6</sup>                  |                                                   |  |
|                                                                                                                                                                                                                                    | Prison 12                     | 815              | <10 <sup>6</sup>                | <10 <sup>6</sup>                  | <10 <sup>6</sup>                    | <10 <sup>6</sup>                  |                                                   |  |
| Prison 13                                                                                                                                                                                                                          | 683                           | <10 <sup>6</sup> | <10 <sup>6</sup>                | <10 <sup>6</sup>                  | <10 <sup>6</sup>                    |                                   |                                                   |  |
| 2018/19                                                                                                                                                                                                                            | Prison 1                      | 1,333            | <10 <sup>6</sup>                | <10 <sup>6</sup>                  | <10 <sup>6</sup>                    | <10 <sup>6</sup>                  |                                                   |  |
|                                                                                                                                                                                                                                    | Prison 2                      | 2,705            | <10 <sup>6</sup>                | <10 <sup>6</sup>                  | <10 <sup>6</sup>                    | <10 <sup>6</sup>                  |                                                   |  |
|                                                                                                                                                                                                                                    | Prison 3                      | 2,522            | <10 <sup>6</sup>                | <10 <sup>6</sup>                  | <10 <sup>6</sup>                    | <10 <sup>6</sup>                  |                                                   |  |
|                                                                                                                                                                                                                                    | Prison 4                      | 2,349            | 11 (0.5)                        | <10 <sup>6</sup>                  | <10 <sup>6</sup>                    | <10 <sup>6</sup>                  |                                                   |  |
|                                                                                                                                                                                                                                    | Prison 5                      | 676              | <10 <sup>6</sup>                | <10 <sup>6</sup>                  | <10 <sup>6</sup>                    | <10 <sup>6</sup>                  |                                                   |  |
|                                                                                                                                                                                                                                    | Prison 6                      | 1,513            | <10 <sup>6</sup>                | <10 <sup>6</sup>                  | <10 <sup>6</sup>                    | <10 <sup>6</sup>                  |                                                   |  |
|                                                                                                                                                                                                                                    | Prison 7                      | 654              | <10 <sup>6</sup>                | <10 <sup>6</sup>                  | <10 <sup>6</sup>                    | <10 <sup>6</sup>                  |                                                   |  |
|                                                                                                                                                                                                                                    | Prison 8                      | 1,148            | <10 <sup>6</sup>                | <10 <sup>6</sup>                  | <10 <sup>6</sup>                    | <10 <sup>6</sup>                  |                                                   |  |
|                                                                                                                                                                                                                                    | Prison 9                      | 996              | 12 (1.2)                        | <10 <sup>6</sup>                  | <10 <sup>6</sup>                    | <10 <sup>6</sup>                  |                                                   |  |
|                                                                                                                                                                                                                                    | Prison 10                     | 2,717            | <10 <sup>6</sup>                | <10 <sup>6</sup>                  | <10 <sup>6</sup>                    | <10 <sup>6</sup>                  |                                                   |  |
|                                                                                                                                                                                                                                    | Prison 11                     | 4,020            | <10 <sup>6</sup>                | <10 <sup>6</sup>                  | <10 <sup>6</sup>                    | <10 <sup>6</sup>                  |                                                   |  |
|                                                                                                                                                                                                                                    | Prison 12                     | 792              | <10 <sup>6</sup>                | <10 <sup>6</sup>                  | <10 <sup>6</sup>                    | <10 <sup>6</sup>                  |                                                   |  |
|                                                                                                                                                                                                                                    | Prison 13                     | 674              | <10 <sup>6</sup>                | <10 <sup>6</sup>                  | <10 <sup>6</sup>                    | <10 <sup>6</sup>                  |                                                   |  |
| 2019/20                                                                                                                                                                                                                            | Prison 1                      | 1,410            | <10 <sup>6</sup>                | <10 <sup>6</sup>                  | <10 <sup>6</sup>                    | <10 <sup>6</sup>                  |                                                   |  |
|                                                                                                                                                                                                                                    | Prison 2                      | 2,979            | <10 <sup>6</sup>                | <10 <sup>6</sup>                  | <10 <sup>6</sup>                    | <10 <sup>6</sup>                  |                                                   |  |
|                                                                                                                                                                                                                                    | Prison 3                      | 2,809            | <10 <sup>6</sup>                | <10 <sup>6</sup>                  | <10 <sup>6</sup>                    | <10 <sup>6</sup>                  |                                                   |  |
|                                                                                                                                                                                                                                    | Prison 4                      | 2,651            | 10 (0.4)                        | <10 <sup>6</sup>                  | <10 <sup>6</sup>                    | <10 <sup>6</sup>                  |                                                   |  |
|                                                                                                                                                                                                                                    | Prison 5                      | 616              | <10 <sup>6</sup>                | <10 <sup>6</sup>                  | <10 <sup>6</sup>                    | <10 <sup>6</sup>                  |                                                   |  |
|                                                                                                                                                                                                                                    | Prison 6                      | 1,533            | <10 <sup>6</sup>                | <10 <sup>6</sup>                  | <10 <sup>6</sup>                    | <10 <sup>6</sup>                  |                                                   |  |
|                                                                                                                                                                                                                                    | Prison 7                      | 860              | <10 <sup>6</sup>                | <10 <sup>6</sup>                  | <10 <sup>6</sup>                    | <10 <sup>6</sup>                  |                                                   |  |
|                                                                                                                                                                                                                                    | Prison 8                      | 1,385            | <10 <sup>6</sup>                | <10 <sup>6</sup>                  | <10 <sup>6</sup>                    | <10 <sup>6</sup>                  |                                                   |  |
|                                                                                                                                                                                                                                    | Prison 9                      | 1,092            | 16 (1.5)                        | 13 (81.3)                         | <10 <sup>6</sup>                    | 13 (81.3)                         |                                                   |  |
|                                                                                                                                                                                                                                    | Prison 10                     | 3,577            | <10 <sup>6</sup>                | <10 <sup>6</sup>                  | <10 <sup>6</sup>                    | <10 <sup>6</sup>                  |                                                   |  |
|                                                                                                                                                                                                                                    | Prison 11                     | 5,348            | <10 <sup>6</sup>                | <10 <sup>6</sup>                  | <10 <sup>6</sup>                    | <10 <sup>6</sup>                  |                                                   |  |
|                                                                                                                                                                                                                                    | Prison 12                     | 805              | <10 <sup>6</sup>                | <10 <sup>6</sup>                  | <10 <sup>6</sup>                    | <10 <sup>6</sup>                  |                                                   |  |
|                                                                                                                                                                                                                                    | Prison 13                     | 746              | <10 <sup>6</sup>                | <10 <sup>6</sup>                  | <10 <sup>6</sup>                    | <10 <sup>6</sup>                  |                                                   |  |
| Prison category                                                                                                                                                                                                                    | 2017/18                       |                  |                                 |                                   |                                     |                                   |                                                   |  |
|                                                                                                                                                                                                                                    | A                             | 1,664            | <10 <sup>6</sup>                | <10 <sup>6</sup>                  | <10 <sup>6</sup>                    | <10 <sup>6</sup>                  |                                                   |  |
|                                                                                                                                                                                                                                    | B                             | 9,254            | 10 (0.1)                        | <10 <sup>6</sup>                  | <10 <sup>6</sup>                    | <10 <sup>6</sup>                  |                                                   |  |
|                                                                                                                                                                                                                                    | C                             | 6,035            | 12 (0.2)                        | 11 (91.7)                         | <10 <sup>6</sup>                    | 11 (91.7)                         |                                                   |  |
|                                                                                                                                                                                                                                    | Closed                        | 1,720            | <10 <sup>6</sup>                | <10 <sup>6</sup>                  | <10 <sup>6</sup>                    | <10 <sup>6</sup>                  |                                                   |  |
|                                                                                                                                                                                                                                    | D                             | 2,189            | <10 <sup>6</sup>                | <10 <sup>6</sup>                  | <10 <sup>6</sup>                    | <10 <sup>6</sup>                  |                                                   |  |
|                                                                                                                                                                                                                                    | YOI                           | 815              | <10 <sup>6</sup>                | <10 <sup>6</sup>                  | <10 <sup>6</sup>                    | <10 <sup>6</sup>                  |                                                   |  |
|                                                                                                                                                                                                                                    | 2018/19                       | A                | 1,670                           | 19 (1.1)                          | 14 (73.7)                           | <10 <sup>6</sup>                  | 14 (73.7)                                         |  |
|                                                                                                                                                                                                                                    |                               | B                | 9,442                           | 11 (0.1)                          | <10 <sup>6</sup>                    | <10 <sup>6</sup>                  | <10 <sup>6</sup>                                  |  |
|                                                                                                                                                                                                                                    |                               | C                | 6,204                           | 16 (0.3)                          | 13 (81.3)                           | <10 <sup>6</sup>                  | 13 (81.3)                                         |  |
|                                                                                                                                                                                                                                    |                               | Closed           | 1,802                           | <10 <sup>6</sup>                  | <10 <sup>6</sup>                    | <10 <sup>6</sup>                  | <10 <sup>6</sup>                                  |  |
|                                                                                                                                                                                                                                    |                               | D                | 2,189                           | <10 <sup>6</sup>                  | <10 <sup>6</sup>                    | <10 <sup>6</sup>                  | <10 <sup>6</sup>                                  |  |
|                                                                                                                                                                                                                                    | 2019/20                       | YOI              | 792                             | <10 <sup>6</sup>                  | <10 <sup>6</sup>                    | <10 <sup>6</sup>                  | <10 <sup>6</sup>                                  |  |
| A                                                                                                                                                                                                                                  |                               | 1,838            | 22 (1.2)                        | 18 (81.8)                         | <10 <sup>6</sup>                    | 18 (81.8)                         |                                                   |  |
| B                                                                                                                                                                                                                                  |                               | 11,904           | 12 (0.1)                        | <10 <sup>6</sup>                  | <10 <sup>6</sup>                    | <10 <sup>6</sup>                  |                                                   |  |
| C                                                                                                                                                                                                                                  |                               | 6,870            | 15 (0.2)                        | 14 (93.3)                         | <10 <sup>6</sup>                    | 14 (93.3)                         |                                                   |  |
| Closed                                                                                                                                                                                                                             |                               | 2,245            | <10 <sup>6</sup>                | <10 <sup>6</sup>                  | <10 <sup>6</sup>                    | <10 <sup>6</sup>                  |                                                   |  |
| D                                                                                                                                                                                                                                  |                               | 2,149            | <10 <sup>6</sup>                | <10 <sup>6</sup>                  | <10 <sup>6</sup>                    | <10 <sup>6</sup>                  |                                                   |  |
| YOI                                                                                                                                                                                                                                | 805                           | <10 <sup>6</sup> | <10 <sup>6</sup>                | <10 <sup>6</sup>                  | <10 <sup>6</sup>                    |                                   |                                                   |  |
| Gender                                                                                                                                                                                                                             | 2017/18                       |                  |                                 |                                   |                                     |                                   |                                                   |  |
|                                                                                                                                                                                                                                    | F                             | 1,699            | <10 <sup>6</sup>                | <10 <sup>6</sup>                  | <10 <sup>6</sup>                    | <10 <sup>6</sup>                  |                                                   |  |
|                                                                                                                                                                                                                                    | M                             | 19,977           | 37 (0.2)                        | 31 (83.8)                         | <10 <sup>6</sup>                    | 31 (83.8)                         |                                                   |  |
|                                                                                                                                                                                                                                    | 2018/19                       | F                | 1,802                           | <10 <sup>6</sup>                  | <10 <sup>6</sup>                    | <10 <sup>6</sup>                  | <10 <sup>6</sup>                                  |  |
|                                                                                                                                                                                                                                    |                               | M                | 20,295                          | 51 (0.3)                          | 40 (78.4)                           | <10 <sup>6</sup>                  | 40 (78.4)                                         |  |
|                                                                                                                                                                                                                                    | 2019/20                       | F                | 1,376                           | <10 <sup>6</sup>                  | <10 <sup>6</sup>                    | <10 <sup>6</sup>                  | <10 <sup>6</sup>                                  |  |
| M                                                                                                                                                                                                                                  |                               | 23,570           | 52 (0.2)                        | 44 (84.6)                         | <10 <sup>6</sup>                    | 44 (84.6)                         |                                                   |  |

<sup>1</sup>Eligible for indicator; <sup>2</sup>Achieve in current prison; <sup>3</sup>Achieve in previous prison; <sup>4</sup>Overall achievement - either current or previous prison; <sup>5</sup>Declined indicator; <sup>6</sup>Suppressed (<10) to avoid disclosure

| The proportion of people with persistent or paroxysmal atrial fibrillation and a CHA2DS2-VASc score equal to two or more, with a prescription for warfarin or a direct-acting oral anticoagulant in the preceding 12 months |                                |                  |                                 |                                   |                                     | Community achievement 2019/20: 87.26% (QOF 19/20) |
|-----------------------------------------------------------------------------------------------------------------------------------------------------------------------------------------------------------------------------|--------------------------------|------------------|---------------------------------|-----------------------------------|-------------------------------------|---------------------------------------------------|
| Indicator                                                                                                                                                                                                                   | Group: Cardiovascular Disease  |                  |                                 |                                   |                                     |                                                   |
|                                                                                                                                                                                                                             | Variable                       | Population       | Eligible <sup>1</sup> (% popln) | Satisfy <sup>2</sup> (% eligible) | Elsewhere <sup>3</sup> (% eligible) | Achieve <sup>4</sup> (% eligible)                 |
| <b>Sentence Status</b>                                                                                                                                                                                                      |                                |                  |                                 |                                   |                                     |                                                   |
| 2017/18                                                                                                                                                                                                                     | .                              | 81               | <10 <sup>b</sup>                | <10 <sup>b</sup>                  | <10 <sup>b</sup>                    | <10 <sup>b</sup>                                  |
|                                                                                                                                                                                                                             | Absconded                      | <10 <sup>b</sup> | <10 <sup>b</sup>                | <10 <sup>b</sup>                  | <10 <sup>b</sup>                    | <10 <sup>b</sup>                                  |
|                                                                                                                                                                                                                             | Active In                      | 15,872           | 32 (0.2)                        | 26 (81.3)                         | <10 <sup>b</sup>                    | 27 (84.4)                                         |
|                                                                                                                                                                                                                             | Active Out                     | 1,052            | <10 <sup>b</sup>                | <10 <sup>b</sup>                  | <10 <sup>b</sup>                    | <10 <sup>b</sup>                                  |
|                                                                                                                                                                                                                             | Convicted Sentence             | 2,125            | <10 <sup>b</sup>                | <10 <sup>b</sup>                  | <10 <sup>b</sup>                    | <10 <sup>b</sup>                                  |
|                                                                                                                                                                                                                             | Downgrade in security category | <10 <sup>b</sup> | <10 <sup>b</sup>                | <10 <sup>b</sup>                  | <10 <sup>b</sup>                    | <10 <sup>b</sup>                                  |
|                                                                                                                                                                                                                             | Internal Cell Move             | <10 <sup>b</sup> | <10 <sup>b</sup>                | <10 <sup>b</sup>                  | <10 <sup>b</sup>                    | <10 <sup>b</sup>                                  |
|                                                                                                                                                                                                                             | Judges Remand                  | 92               | <10 <sup>b</sup>                | <10 <sup>b</sup>                  | <10 <sup>b</sup>                    | <10 <sup>b</sup>                                  |
|                                                                                                                                                                                                                             | Licence Revoke                 | 52               | <10 <sup>b</sup>                | <10 <sup>b</sup>                  | <10 <sup>b</sup>                    | <10 <sup>b</sup>                                  |
|                                                                                                                                                                                                                             | On Remand                      | 1,492            | <10 <sup>b</sup>                | <10 <sup>b</sup>                  | <10 <sup>b</sup>                    | <10 <sup>b</sup>                                  |
|                                                                                                                                                                                                                             | Transfer                       | 910              | <10 <sup>b</sup>                | <10 <sup>b</sup>                  | <10 <sup>b</sup>                    | <10 <sup>b</sup>                                  |
|                                                                                                                                                                                                                             | Upgrade in security category   | <10 <sup>b</sup> | <10 <sup>b</sup>                | <10 <sup>b</sup>                  | <10 <sup>b</sup>                    | <10 <sup>b</sup>                                  |
| 2018/19                                                                                                                                                                                                                     | .                              | 88               | <10 <sup>b</sup>                | <10 <sup>b</sup>                  | <10 <sup>b</sup>                    | <10 <sup>b</sup>                                  |
|                                                                                                                                                                                                                             | Absconded                      | <10 <sup>b</sup> | <10 <sup>b</sup>                | <10 <sup>b</sup>                  | <10 <sup>b</sup>                    | <10 <sup>b</sup>                                  |
|                                                                                                                                                                                                                             | Active In                      | 18,145           | 45 (0.2)                        | 36 (80.0)                         | <10 <sup>b</sup>                    | 36 (80.0)                                         |
|                                                                                                                                                                                                                             | Active Out                     | 835              | <10 <sup>b</sup>                | <10 <sup>b</sup>                  | <10 <sup>b</sup>                    | <10 <sup>b</sup>                                  |
|                                                                                                                                                                                                                             | Convicted Sentence             | 1,320            | <10 <sup>b</sup>                | <10 <sup>b</sup>                  | <10 <sup>b</sup>                    | <10 <sup>b</sup>                                  |
|                                                                                                                                                                                                                             | Downgrade in security category | <10 <sup>b</sup> | <10 <sup>b</sup>                | <10 <sup>b</sup>                  | <10 <sup>b</sup>                    | <10 <sup>b</sup>                                  |
|                                                                                                                                                                                                                             | Internal Cell Move             | <10 <sup>b</sup> | <10 <sup>b</sup>                | <10 <sup>b</sup>                  | <10 <sup>b</sup>                    | <10 <sup>b</sup>                                  |
|                                                                                                                                                                                                                             | Judges Remand                  | <10 <sup>b</sup> | <10 <sup>b</sup>                | <10 <sup>b</sup>                  | <10 <sup>b</sup>                    | <10 <sup>b</sup>                                  |
|                                                                                                                                                                                                                             | Licence Revoke                 | 125              | <10 <sup>b</sup>                | <10 <sup>b</sup>                  | <10 <sup>b</sup>                    | <10 <sup>b</sup>                                  |
|                                                                                                                                                                                                                             | On Remand                      | 1,059            | <10 <sup>b</sup>                | <10 <sup>b</sup>                  | <10 <sup>b</sup>                    | <10 <sup>b</sup>                                  |
|                                                                                                                                                                                                                             | Transfer                       | 518              | <10 <sup>b</sup>                | <10 <sup>b</sup>                  | <10 <sup>b</sup>                    | <10 <sup>b</sup>                                  |
|                                                                                                                                                                                                                             | Upgrade in security category   | <10 <sup>b</sup> | <10 <sup>b</sup>                | <10 <sup>b</sup>                  | <10 <sup>b</sup>                    | <10 <sup>b</sup>                                  |
| 2019/20                                                                                                                                                                                                                     | .                              | 69               | <10 <sup>b</sup>                | <10 <sup>b</sup>                  | <10 <sup>b</sup>                    | <10 <sup>b</sup>                                  |
|                                                                                                                                                                                                                             | Absconded                      | <10 <sup>b</sup> | <10 <sup>b</sup>                | <10 <sup>b</sup>                  | <10 <sup>b</sup>                    | <10 <sup>b</sup>                                  |
|                                                                                                                                                                                                                             | Active In                      | 22,424           | 46 (0.2)                        | 40 (87.0)                         | <10 <sup>b</sup>                    | 40 (87.0)                                         |
|                                                                                                                                                                                                                             | Active Out                     | 625              | <10 <sup>b</sup>                | <10 <sup>b</sup>                  | <10 <sup>b</sup>                    | <10 <sup>b</sup>                                  |
|                                                                                                                                                                                                                             | Convicted Sentence             | 1,361            | <10 <sup>b</sup>                | <10 <sup>b</sup>                  | <10 <sup>b</sup>                    | <10 <sup>b</sup>                                  |
|                                                                                                                                                                                                                             | Downgrade in security category | <10 <sup>b</sup> | <10 <sup>b</sup>                | <10 <sup>b</sup>                  | <10 <sup>b</sup>                    | <10 <sup>b</sup>                                  |
|                                                                                                                                                                                                                             | Internal Cell Move             | <10 <sup>b</sup> | <10 <sup>b</sup>                | <10 <sup>b</sup>                  | <10 <sup>b</sup>                    | <10 <sup>b</sup>                                  |
|                                                                                                                                                                                                                             | Judges Remand                  | 19               | <10 <sup>b</sup>                | <10 <sup>b</sup>                  | <10 <sup>b</sup>                    | <10 <sup>b</sup>                                  |
|                                                                                                                                                                                                                             | Licence Revoke                 | 178              | <10 <sup>b</sup>                | <10 <sup>b</sup>                  | <10 <sup>b</sup>                    | <10 <sup>b</sup>                                  |
|                                                                                                                                                                                                                             | On Remand                      | 1,031            | <10 <sup>b</sup>                | <10 <sup>b</sup>                  | <10 <sup>b</sup>                    | <10 <sup>b</sup>                                  |
|                                                                                                                                                                                                                             | Transfer                       | 101              | <10 <sup>b</sup>                | <10 <sup>b</sup>                  | <10 <sup>b</sup>                    | <10 <sup>b</sup>                                  |
|                                                                                                                                                                                                                             | Upgrade in security category   | <10 <sup>b</sup> | <10 <sup>b</sup>                | <10 <sup>b</sup>                  | <10 <sup>b</sup>                    | <10 <sup>b</sup>                                  |
| <b>Age - years</b>                                                                                                                                                                                                          |                                |                  |                                 |                                   |                                     |                                                   |
| 2017/18                                                                                                                                                                                                                     | 10 - <20                       | 468              | <10 <sup>b</sup>                | <10 <sup>b</sup>                  | <10 <sup>b</sup>                    | <10 <sup>b</sup>                                  |
|                                                                                                                                                                                                                             | 20 - <30                       | 6,994            | <10 <sup>b</sup>                | <10 <sup>b</sup>                  | <10 <sup>b</sup>                    | <10 <sup>b</sup>                                  |
|                                                                                                                                                                                                                             | 30 - <40                       | 7,051            | <10 <sup>b</sup>                | <10 <sup>b</sup>                  | <10 <sup>b</sup>                    | <10 <sup>b</sup>                                  |
|                                                                                                                                                                                                                             | 40 - <50                       | 4,114            | <10 <sup>b</sup>                | <10 <sup>b</sup>                  | <10 <sup>b</sup>                    | <10 <sup>b</sup>                                  |
|                                                                                                                                                                                                                             | 50 - <60                       | 2,107            | 11 (0.5)                        | 8 (72.7)                          | <10 <sup>b</sup>                    | <10 <sup>b</sup>                                  |
|                                                                                                                                                                                                                             | 60 - <70                       | 684              | 13 (1.9)                        | 11 (84.6)                         | <10 <sup>b</sup>                    | 11 (84.6)                                         |
|                                                                                                                                                                                                                             | 70 - <80                       | 213              | 11 (5.2)                        | 10 (90.9)                         | <10 <sup>b</sup>                    | 10 (90.9)                                         |
|                                                                                                                                                                                                                             | 80 - <90                       | 40               | <10 <sup>b</sup>                | <10 <sup>b</sup>                  | <10 <sup>b</sup>                    | <10 <sup>b</sup>                                  |
|                                                                                                                                                                                                                             | 90 - <100                      | <10 <sup>b</sup> | <10 <sup>b</sup>                | <10 <sup>b</sup>                  | <10 <sup>b</sup>                    | <10 <sup>b</sup>                                  |
|                                                                                                                                                                                                                             | 100 - <110                     | <10 <sup>b</sup> | <10 <sup>b</sup>                | <10 <sup>b</sup>                  | <10 <sup>b</sup>                    | <10 <sup>b</sup>                                  |
| 2018/19                                                                                                                                                                                                                     | 10 - <20                       | 436              | <10 <sup>b</sup>                | <10 <sup>b</sup>                  | <10 <sup>b</sup>                    | <10 <sup>b</sup>                                  |
|                                                                                                                                                                                                                             | 20 - <30                       | 7,163            | <10 <sup>b</sup>                | <10 <sup>b</sup>                  | <10 <sup>b</sup>                    | <10 <sup>b</sup>                                  |
|                                                                                                                                                                                                                             | 30 - <40                       | 7,381            | <10 <sup>b</sup>                | <10 <sup>b</sup>                  | <10 <sup>b</sup>                    | <10 <sup>b</sup>                                  |
|                                                                                                                                                                                                                             | 40 - <50                       | 4,180            | <10 <sup>b</sup>                | <10 <sup>b</sup>                  | <10 <sup>b</sup>                    | <10 <sup>b</sup>                                  |
|                                                                                                                                                                                                                             | 50 - <60                       | 1,978            | 10 (0.5)                        | <10 <sup>b</sup>                  | <10 <sup>b</sup>                    | <10 <sup>b</sup>                                  |
|                                                                                                                                                                                                                             | 60 - <70                       | 701              | 21 (3.0)                        | 17 (81.0)                         | <10 <sup>b</sup>                    | 17 (81.0)                                         |
|                                                                                                                                                                                                                             | 70 - <80                       | 209              | 13 (6.2)                        | 11 (84.6)                         | <10 <sup>b</sup>                    | 11 (84.6)                                         |
|                                                                                                                                                                                                                             | 80 - <90                       | 45               | <10 <sup>b</sup>                | <10 <sup>b</sup>                  | <10 <sup>b</sup>                    | <10 <sup>b</sup>                                  |
|                                                                                                                                                                                                                             | 90 - <100                      | <10 <sup>b</sup> | <10 <sup>b</sup>                | <10 <sup>b</sup>                  | <10 <sup>b</sup>                    | <10 <sup>b</sup>                                  |
|                                                                                                                                                                                                                             | 100 - <110                     | <10 <sup>b</sup> | <10 <sup>b</sup>                | <10 <sup>b</sup>                  | <10 <sup>b</sup>                    | <10 <sup>b</sup>                                  |
| 2019/20                                                                                                                                                                                                                     | 10 - <20                       | 404              | <10 <sup>b</sup>                | <10 <sup>b</sup>                  | <10 <sup>b</sup>                    | <10 <sup>b</sup>                                  |
|                                                                                                                                                                                                                             | 20 - <30                       | 8,064            | <10 <sup>b</sup>                | <10 <sup>b</sup>                  | <10 <sup>b</sup>                    | <10 <sup>b</sup>                                  |
|                                                                                                                                                                                                                             | 30 - <40                       | 9,125            | <10 <sup>b</sup>                | <10 <sup>b</sup>                  | <10 <sup>b</sup>                    | <10 <sup>b</sup>                                  |
|                                                                                                                                                                                                                             | 40 - <50                       | 4,948            | <10 <sup>b</sup>                | <10 <sup>b</sup>                  | <10 <sup>b</sup>                    | <10 <sup>b</sup>                                  |
|                                                                                                                                                                                                                             | 50 - <60                       | 2,224            | <10 <sup>b</sup>                | <10 <sup>b</sup>                  | <10 <sup>b</sup>                    | <10 <sup>b</sup>                                  |
|                                                                                                                                                                                                                             | 60 - <70                       | 751              | 22 (2.9)                        | 19 (86.4)                         | <10 <sup>b</sup>                    | 19 (86.4)                                         |
|                                                                                                                                                                                                                             | 70 - <80                       | 238              | 15 (6.3)                        | 12 (80.0)                         | <10 <sup>b</sup>                    | 12 (80.0)                                         |
|                                                                                                                                                                                                                             | 80 - <90                       | 53               | <10 <sup>b</sup>                | <10 <sup>b</sup>                  | <10 <sup>b</sup>                    | <10 <sup>b</sup>                                  |
|                                                                                                                                                                                                                             | 90 - <100                      | <10 <sup>b</sup> | <10 <sup>b</sup>                | <10 <sup>b</sup>                  | <10 <sup>b</sup>                    | <10 <sup>b</sup>                                  |
|                                                                                                                                                                                                                             | 100 - <110                     | <10 <sup>b</sup> | <10 <sup>b</sup>                | <10 <sup>b</sup>                  | <10 <sup>b</sup>                    | <10 <sup>b</sup>                                  |

<sup>1</sup>Eligible for indicator; <sup>2</sup>Achieve in current prison; <sup>3</sup>Achieve in previous prison; <sup>4</sup>Overall achievement - either current or previous prison; <sup>5</sup>Declined indicator; <sup>6</sup>Suppressed (<10) to avoid disclosure

| <i>The proportion of people with persistent or paroxysmal atrial fibrillation and a CHA2DS2-VASc score equal to two or more, with a prescription for warfarin or a direct-acting oral anticoagulant in the preceding 12 months</i> |                               |                                 |                                   |                                     |                                   |                  | Community achievement 2019/20:<br>87.26% (QOF 19/20) |
|------------------------------------------------------------------------------------------------------------------------------------------------------------------------------------------------------------------------------------|-------------------------------|---------------------------------|-----------------------------------|-------------------------------------|-----------------------------------|------------------|------------------------------------------------------|
| Indicator                                                                                                                                                                                                                          | Group: Cardiovascular Disease |                                 |                                   |                                     |                                   |                  |                                                      |
| Variable                                                                                                                                                                                                                           | Population                    | Eligible <sup>1</sup> (% popln) | Satisfy <sup>2</sup> (% eligible) | Elsewhere <sup>3</sup> (% eligible) | Achieve <sup>4</sup> (% eligible) |                  |                                                      |
| <b>Length of Stay (months)</b>                                                                                                                                                                                                     |                               |                                 |                                   |                                     |                                   |                  |                                                      |
| 2017/18                                                                                                                                                                                                                            | <1                            | 4,474                           | <10 <sup>6</sup>                  | <10 <sup>6</sup>                    | <10 <sup>6</sup>                  | <10 <sup>6</sup> |                                                      |
|                                                                                                                                                                                                                                    | 1-<6                          | 8,075                           | <10 <sup>6</sup>                  | <10 <sup>6</sup>                    | <10 <sup>6</sup>                  | <10 <sup>6</sup> |                                                      |
|                                                                                                                                                                                                                                    | 6-<12                         | 3,672                           | <10 <sup>6</sup>                  | <10 <sup>6</sup>                    | <10 <sup>6</sup>                  | <10 <sup>6</sup> |                                                      |
|                                                                                                                                                                                                                                    | 12-<24                        | 2,832                           | <10 <sup>6</sup>                  | <10 <sup>6</sup>                    | <10 <sup>6</sup>                  | <10 <sup>6</sup> |                                                      |
|                                                                                                                                                                                                                                    | 24+                           | 2,624                           | 18 (0.7)                          | 13 (72.2)                           | <10 <sup>6</sup>                  | 14 (77.8)        |                                                      |
| 2018/19                                                                                                                                                                                                                            | <1                            | 4,801                           | <10 <sup>6</sup>                  | <10 <sup>6</sup>                    | <10 <sup>6</sup>                  | <10 <sup>6</sup> |                                                      |
|                                                                                                                                                                                                                                    | 1-<6                          | 7,742                           | <10 <sup>6</sup>                  | <10 <sup>6</sup>                    | <10 <sup>6</sup>                  | <10 <sup>6</sup> |                                                      |
|                                                                                                                                                                                                                                    | 6-<12                         | 3,616                           | <10 <sup>6</sup>                  | <10 <sup>6</sup>                    | <10 <sup>6</sup>                  | <10 <sup>6</sup> |                                                      |
|                                                                                                                                                                                                                                    | 12-<24                        | 3,447                           | 13 (0.4)                          | 13 (100.0)                          | <10 <sup>6</sup>                  | 13 (100.0)       |                                                      |
|                                                                                                                                                                                                                                    | 24+                           | 2,493                           | 27 (1.1)                          | 18 (66.7)                           | <10 <sup>6</sup>                  | 18 (66.7)        |                                                      |
| 2019/20                                                                                                                                                                                                                            | <1                            | 5,745                           | <10 <sup>6</sup>                  | <10 <sup>6</sup>                    | <10 <sup>6</sup>                  | <10 <sup>6</sup> |                                                      |
|                                                                                                                                                                                                                                    | 1-<6                          | 9,697                           | <10 <sup>6</sup>                  | <10 <sup>6</sup>                    | <10 <sup>6</sup>                  | <10 <sup>6</sup> |                                                      |
|                                                                                                                                                                                                                                    | 6-<12                         | 5,090                           | <10 <sup>6</sup>                  | <10 <sup>6</sup>                    | <10 <sup>6</sup>                  | <10 <sup>6</sup> |                                                      |
|                                                                                                                                                                                                                                    | 12-<24                        | 3,244                           | 16 (0.5)                          | 14 (87.5)                           | <10 <sup>6</sup>                  | 14 (87.5)        |                                                      |
|                                                                                                                                                                                                                                    | 24+                           | 2,035                           | 26 (1.3)                          | 19 (73.1)                           | <10 <sup>6</sup>                  | 19 (73.1)        |                                                      |
| <b>Ethnic Group</b>                                                                                                                                                                                                                |                               |                                 |                                   |                                     |                                   |                  |                                                      |
| 2017/18                                                                                                                                                                                                                            | White                         | 15,638                          | 35 (0.2)                          | 30 (85.7)                           | <10 <sup>6</sup>                  | 31 (88.6)        |                                                      |
|                                                                                                                                                                                                                                    | Mixed                         | 431                             | <10 <sup>6</sup>                  | <10 <sup>6</sup>                    | <10 <sup>6</sup>                  | <10 <sup>6</sup> |                                                      |
|                                                                                                                                                                                                                                    | Asian or Asian British        | 813                             | <10 <sup>6</sup>                  | <10 <sup>6</sup>                    | <10 <sup>6</sup>                  | <10 <sup>6</sup> |                                                      |
|                                                                                                                                                                                                                                    | Black or Black British        | 404                             | <10 <sup>6</sup>                  | <10 <sup>6</sup>                    | <10 <sup>6</sup>                  | <10 <sup>6</sup> |                                                      |
|                                                                                                                                                                                                                                    | Chinese and Other             | 214                             | <10 <sup>6</sup>                  | <10 <sup>6</sup>                    | <10 <sup>6</sup>                  | <10 <sup>6</sup> |                                                      |
|                                                                                                                                                                                                                                    | Unclassified                  | 372                             | <10 <sup>6</sup>                  | <10 <sup>6</sup>                    | <10 <sup>6</sup>                  | <10 <sup>6</sup> |                                                      |
| 2018/19                                                                                                                                                                                                                            | White                         | 14,911                          | 46 (0.3)                          | 36 (78.3)                           | <10 <sup>6</sup>                  | 36 (78.3)        |                                                      |
|                                                                                                                                                                                                                                    | Mixed                         | 371                             | <10 <sup>6</sup>                  | <10 <sup>6</sup>                    | <10 <sup>6</sup>                  | <10 <sup>6</sup> |                                                      |
|                                                                                                                                                                                                                                    | Asian or Asian British        | 726                             | <10 <sup>6</sup>                  | <10 <sup>6</sup>                    | <10 <sup>6</sup>                  | <10 <sup>6</sup> |                                                      |
|                                                                                                                                                                                                                                    | Black or Black British        | 364                             | <10 <sup>6</sup>                  | <10 <sup>6</sup>                    | <10 <sup>6</sup>                  | <10 <sup>6</sup> |                                                      |
|                                                                                                                                                                                                                                    | Chinese and Other             | 167                             | <10 <sup>6</sup>                  | <10 <sup>6</sup>                    | <10 <sup>6</sup>                  | <10 <sup>6</sup> |                                                      |
|                                                                                                                                                                                                                                    | Unclassified                  | 409                             | <10 <sup>6</sup>                  | <10 <sup>6</sup>                    | <10 <sup>6</sup>                  | <10 <sup>6</sup> |                                                      |
| 2019/20                                                                                                                                                                                                                            | White                         | 16,606                          | 48 (0.3)                          | 40 (83.3)                           | <10 <sup>6</sup>                  | 40 (83.3)        |                                                      |
|                                                                                                                                                                                                                                    | Mixed                         | 409                             | <10 <sup>6</sup>                  | <10 <sup>6</sup>                    | <10 <sup>6</sup>                  | <10 <sup>6</sup> |                                                      |
|                                                                                                                                                                                                                                    | Asian or Asian British        | 755                             | <10 <sup>6</sup>                  | <10 <sup>6</sup>                    | <10 <sup>6</sup>                  | <10 <sup>6</sup> |                                                      |
|                                                                                                                                                                                                                                    | Black or Black British        | 451                             | <10 <sup>6</sup>                  | <10 <sup>6</sup>                    | <10 <sup>6</sup>                  | <10 <sup>6</sup> |                                                      |
|                                                                                                                                                                                                                                    | Chinese and Other             | 163                             | <10 <sup>6</sup>                  | <10 <sup>6</sup>                    | <10 <sup>6</sup>                  | <10 <sup>6</sup> |                                                      |
|                                                                                                                                                                                                                                    | Unclassified                  | 387                             | <10 <sup>6</sup>                  | <10 <sup>6</sup>                    | <10 <sup>6</sup>                  | <10 <sup>6</sup> |                                                      |

<sup>1</sup>Eligible for indicator; <sup>2</sup>Achieve in current prison; <sup>3</sup>Achieve in previous prison; <sup>4</sup>Overall achievement - either current or previous prison; <sup>5</sup>Declined indicator; <sup>6</sup>Suppressed (<10) to avoid disclosure

| Indicator                     |           | The proportion of people with persistent or paroxysmal atrial fibrillation and a CHA2DS2-VASc score in the preceding 12 months |                                 |                                   |                                     |                                   |
|-------------------------------|-----------|--------------------------------------------------------------------------------------------------------------------------------|---------------------------------|-----------------------------------|-------------------------------------|-----------------------------------|
| Group: Cardiovascular Disease |           | Population                                                                                                                     | Eligible <sup>1</sup> (% popln) | Satisfy <sup>2</sup> (% eligible) | Elsewhere <sup>3</sup> (% eligible) | Achieve <sup>4</sup> (% eligible) |
| Variable                      |           |                                                                                                                                |                                 |                                   |                                     |                                   |
| <b>Year</b>                   |           |                                                                                                                                |                                 |                                   |                                     |                                   |
|                               | 2017/18   | 21,677                                                                                                                         | 22 (0.1)                        | <10 <sup>6</sup>                  | <10 <sup>6</sup>                    | <10 <sup>6</sup>                  |
|                               | 2018/19   | 22,099                                                                                                                         | 23 (0.1)                        | 12 (52.2)                         | <10 <sup>6</sup>                    | 12 (52.2)                         |
|                               | 2019/20   | 25,811                                                                                                                         | 25 (0.1)                        | 15 (60.0)                         | <10 <sup>6</sup>                    | 15 (60.0)                         |
| <b>Prison</b>                 |           |                                                                                                                                |                                 |                                   |                                     |                                   |
| 2017/18                       | Prison 1  | 1,323                                                                                                                          | <10 <sup>6</sup>                | <10 <sup>6</sup>                  | <10 <sup>6</sup>                    | <10 <sup>6</sup>                  |
|                               | Prison 2  | 3,261                                                                                                                          | <10 <sup>6</sup>                | <10 <sup>6</sup>                  | <10 <sup>6</sup>                    | <10 <sup>6</sup>                  |
|                               | Prison 3  | 2,623                                                                                                                          | <10 <sup>6</sup>                | <10 <sup>6</sup>                  | <10 <sup>6</sup>                    | <10 <sup>6</sup>                  |
|                               | Prison 4  | 2,089                                                                                                                          | <10 <sup>6</sup>                | <10 <sup>6</sup>                  | <10 <sup>6</sup>                    | <10 <sup>6</sup>                  |
|                               | Prison 5  | 637                                                                                                                            | <10 <sup>6</sup>                | <10 <sup>6</sup>                  | <10 <sup>6</sup>                    | <10 <sup>6</sup>                  |
|                               | Prison 6  | 1,552                                                                                                                          | <10 <sup>6</sup>                | <10 <sup>6</sup>                  | <10 <sup>6</sup>                    | <10 <sup>6</sup>                  |
|                               | Prison 7  | 635                                                                                                                            | <10 <sup>6</sup>                | <10 <sup>6</sup>                  | <10 <sup>6</sup>                    | <10 <sup>6</sup>                  |
|                               | Prison 8  | 1,085                                                                                                                          | <10 <sup>6</sup>                | <10 <sup>6</sup>                  | <10 <sup>6</sup>                    | <10 <sup>6</sup>                  |
|                               | Prison 9  | 981                                                                                                                            | <10 <sup>6</sup>                | <10 <sup>6</sup>                  | <10 <sup>6</sup>                    | <10 <sup>6</sup>                  |
|                               | Prison 10 | 2,523                                                                                                                          | <10 <sup>6</sup>                | <10 <sup>6</sup>                  | <10 <sup>6</sup>                    | <10 <sup>6</sup>                  |
|                               | Prison 11 | 3,470                                                                                                                          | <10 <sup>6</sup>                | <10 <sup>6</sup>                  | <10 <sup>6</sup>                    | <10 <sup>6</sup>                  |
|                               | Prison 12 | 815                                                                                                                            | <10 <sup>6</sup>                | <10 <sup>6</sup>                  | <10 <sup>6</sup>                    | <10 <sup>6</sup>                  |
|                               | Prison 13 | 683                                                                                                                            | <10 <sup>6</sup>                | <10 <sup>6</sup>                  | <10 <sup>6</sup>                    | <10 <sup>6</sup>                  |
| 2018/19                       | Prison 1  | 1,333                                                                                                                          | <10 <sup>6</sup>                | <10 <sup>6</sup>                  | <10 <sup>6</sup>                    | <10 <sup>6</sup>                  |
|                               | Prison 2  | 2,705                                                                                                                          | <10 <sup>6</sup>                | <10 <sup>6</sup>                  | <10 <sup>6</sup>                    | <10 <sup>6</sup>                  |
|                               | Prison 3  | 2,522                                                                                                                          | <10 <sup>6</sup>                | <10 <sup>6</sup>                  | <10 <sup>6</sup>                    | <10 <sup>6</sup>                  |
|                               | Prison 4  | 2,349                                                                                                                          | <10 <sup>6</sup>                | <10 <sup>6</sup>                  | <10 <sup>6</sup>                    | <10 <sup>6</sup>                  |
|                               | Prison 5  | 676                                                                                                                            | <10 <sup>6</sup>                | <10 <sup>6</sup>                  | <10 <sup>6</sup>                    | <10 <sup>6</sup>                  |
|                               | Prison 6  | 1,513                                                                                                                          | <10 <sup>6</sup>                | <10 <sup>6</sup>                  | <10 <sup>6</sup>                    | <10 <sup>6</sup>                  |
|                               | Prison 7  | 654                                                                                                                            | <10 <sup>6</sup>                | <10 <sup>6</sup>                  | <10 <sup>6</sup>                    | <10 <sup>6</sup>                  |
|                               | Prison 8  | 1,148                                                                                                                          | <10 <sup>6</sup>                | <10 <sup>6</sup>                  | <10 <sup>6</sup>                    | <10 <sup>6</sup>                  |
|                               | Prison 9  | 996                                                                                                                            | <10 <sup>6</sup>                | <10 <sup>6</sup>                  | <10 <sup>6</sup>                    | <10 <sup>6</sup>                  |
|                               | Prison 10 | 2,717                                                                                                                          | <10 <sup>6</sup>                | <10 <sup>6</sup>                  | <10 <sup>6</sup>                    | <10 <sup>6</sup>                  |
|                               | Prison 11 | 4,020                                                                                                                          | <10 <sup>6</sup>                | <10 <sup>6</sup>                  | <10 <sup>6</sup>                    | <10 <sup>6</sup>                  |
|                               | Prison 12 | 792                                                                                                                            | <10 <sup>6</sup>                | <10 <sup>6</sup>                  | <10 <sup>6</sup>                    | <10 <sup>6</sup>                  |
|                               | Prison 13 | 674                                                                                                                            | <10 <sup>6</sup>                | <10 <sup>6</sup>                  | <10 <sup>6</sup>                    | <10 <sup>6</sup>                  |
| 2019/20                       | Prison 1  | 1,410                                                                                                                          | <10 <sup>6</sup>                | <10 <sup>6</sup>                  | <10 <sup>6</sup>                    | <10 <sup>6</sup>                  |
|                               | Prison 2  | 2,979                                                                                                                          | <10 <sup>6</sup>                | <10 <sup>6</sup>                  | <10 <sup>6</sup>                    | <10 <sup>6</sup>                  |
|                               | Prison 3  | 2,809                                                                                                                          | <10 <sup>6</sup>                | <10 <sup>6</sup>                  | <10 <sup>6</sup>                    | <10 <sup>6</sup>                  |
|                               | Prison 4  | 2,651                                                                                                                          | <10 <sup>6</sup>                | <10 <sup>6</sup>                  | <10 <sup>6</sup>                    | <10 <sup>6</sup>                  |
|                               | Prison 5  | 616                                                                                                                            | <10 <sup>6</sup>                | <10 <sup>6</sup>                  | <10 <sup>6</sup>                    | <10 <sup>6</sup>                  |
|                               | Prison 6  | 1,533                                                                                                                          | <10 <sup>6</sup>                | <10 <sup>6</sup>                  | <10 <sup>6</sup>                    | <10 <sup>6</sup>                  |
|                               | Prison 7  | 860                                                                                                                            | <10 <sup>6</sup>                | <10 <sup>6</sup>                  | <10 <sup>6</sup>                    | <10 <sup>6</sup>                  |
|                               | Prison 8  | 1,385                                                                                                                          | <10 <sup>6</sup>                | <10 <sup>6</sup>                  | <10 <sup>6</sup>                    | <10 <sup>6</sup>                  |
|                               | Prison 9  | 1,092                                                                                                                          | <10 <sup>6</sup>                | <10 <sup>6</sup>                  | <10 <sup>6</sup>                    | <10 <sup>6</sup>                  |
|                               | Prison 10 | 3,577                                                                                                                          | <10 <sup>6</sup>                | <10 <sup>6</sup>                  | <10 <sup>6</sup>                    | <10 <sup>6</sup>                  |
|                               | Prison 11 | 5,348                                                                                                                          | <10 <sup>6</sup>                | <10 <sup>6</sup>                  | <10 <sup>6</sup>                    | <10 <sup>6</sup>                  |
|                               | Prison 12 | 805                                                                                                                            | <10 <sup>6</sup>                | <10 <sup>6</sup>                  | <10 <sup>6</sup>                    | <10 <sup>6</sup>                  |
|                               | Prison 13 | 746                                                                                                                            | <10 <sup>6</sup>                | <10 <sup>6</sup>                  | <10 <sup>6</sup>                    | <10 <sup>6</sup>                  |
| <b>Prison category</b>        |           |                                                                                                                                |                                 |                                   |                                     |                                   |
| 2017/18                       | A         | 1,664                                                                                                                          | <10 <sup>6</sup>                | <10 <sup>6</sup>                  | <10 <sup>6</sup>                    | <10 <sup>6</sup>                  |
|                               | B         | 9,254                                                                                                                          | <10 <sup>6</sup>                | <10 <sup>6</sup>                  | <10 <sup>6</sup>                    | <10 <sup>6</sup>                  |
|                               | C         | 6,035                                                                                                                          | <10 <sup>6</sup>                | <10 <sup>6</sup>                  | <10 <sup>6</sup>                    | <10 <sup>6</sup>                  |
|                               | Closed    | 1,720                                                                                                                          | <10 <sup>6</sup>                | <10 <sup>6</sup>                  | <10 <sup>6</sup>                    | <10 <sup>6</sup>                  |
|                               | D         | 2,189                                                                                                                          | <10 <sup>6</sup>                | <10 <sup>6</sup>                  | <10 <sup>6</sup>                    | <10 <sup>6</sup>                  |
|                               | YOI       | 815                                                                                                                            | <10 <sup>6</sup>                | <10 <sup>6</sup>                  | <10 <sup>6</sup>                    | <10 <sup>6</sup>                  |
| 2018/19                       | A         | 1,670                                                                                                                          | <10 <sup>6</sup>                | <10 <sup>6</sup>                  | <10 <sup>6</sup>                    | <10 <sup>6</sup>                  |
|                               | B         | 9,442                                                                                                                          | <10 <sup>6</sup>                | <10 <sup>6</sup>                  | <10 <sup>6</sup>                    | <10 <sup>6</sup>                  |
|                               | C         | 6,204                                                                                                                          | <10 <sup>6</sup>                | <10 <sup>6</sup>                  | <10 <sup>6</sup>                    | <10 <sup>6</sup>                  |
|                               | Closed    | 1,802                                                                                                                          | <10 <sup>6</sup>                | <10 <sup>6</sup>                  | <10 <sup>6</sup>                    | <10 <sup>6</sup>                  |
|                               | D         | 2,189                                                                                                                          | <10 <sup>6</sup>                | <10 <sup>6</sup>                  | <10 <sup>6</sup>                    | <10 <sup>6</sup>                  |
|                               | YOI       | 792                                                                                                                            | <10 <sup>6</sup>                | <10 <sup>6</sup>                  | <10 <sup>6</sup>                    | <10 <sup>6</sup>                  |
| 2019/20                       | A         | 1,838                                                                                                                          | 10 (0.5)                        | <10 <sup>6</sup>                  | <10 <sup>6</sup>                    | <10 <sup>6</sup>                  |
|                               | B         | 11,904                                                                                                                         | <10 <sup>6</sup>                | <10 <sup>6</sup>                  | <10 <sup>6</sup>                    | <10 <sup>6</sup>                  |
|                               | C         | 6,870                                                                                                                          | <10 <sup>6</sup>                | <10 <sup>6</sup>                  | <10 <sup>6</sup>                    | <10 <sup>6</sup>                  |
|                               | Closed    | 2,245                                                                                                                          | <10 <sup>6</sup>                | <10 <sup>6</sup>                  | <10 <sup>6</sup>                    | <10 <sup>6</sup>                  |
|                               | D         | 2,149                                                                                                                          | <10 <sup>6</sup>                | <10 <sup>6</sup>                  | <10 <sup>6</sup>                    | <10 <sup>6</sup>                  |
|                               | YOI       | 805                                                                                                                            | <10 <sup>6</sup>                | <10 <sup>6</sup>                  | <10 <sup>6</sup>                    | <10 <sup>6</sup>                  |
| <b>Gender</b>                 |           |                                                                                                                                |                                 |                                   |                                     |                                   |
| 2017/18                       | F         | 1,699                                                                                                                          | <10 <sup>6</sup>                | <10 <sup>6</sup>                  | <10 <sup>6</sup>                    | <10 <sup>6</sup>                  |
|                               | M         | 19,977                                                                                                                         | 21 (0.1)                        | <10 <sup>6</sup>                  | <10 <sup>6</sup>                    | <10 <sup>6</sup>                  |
| 2018/19                       | F         | 1,802                                                                                                                          | <10 <sup>6</sup>                | <10 <sup>6</sup>                  | <10 <sup>6</sup>                    | <10 <sup>6</sup>                  |
|                               | M         | 20,295                                                                                                                         | 22 (0.1)                        | 12 (54.5)                         | <10 <sup>6</sup>                    | 12 (54.5)                         |
| 2019/20                       | F         | 1,376                                                                                                                          | <10 <sup>6</sup>                | <10 <sup>6</sup>                  | <10 <sup>6</sup>                    | <10 <sup>6</sup>                  |
|                               | M         | 23,570                                                                                                                         | 24 (0.1)                        | 14 (58.3)                         | <10 <sup>6</sup>                    | 14 (58.3)                         |

<sup>1</sup>Eligible for indicator; <sup>2</sup>Achieve in current prison; <sup>3</sup>Achieve in previous prison; <sup>4</sup>Overall achievement - either current or previous prison; <sup>5</sup>Declined indicator; <sup>6</sup>Suppressed (<10) to avoid disclosure



| Indicator                     |                                | The proportion of people with persistent or paroxysmal atrial fibrillation and a CHA2DS2-VASc score in the preceding 12 months |                                   |                                     |                                   |                  |
|-------------------------------|--------------------------------|--------------------------------------------------------------------------------------------------------------------------------|-----------------------------------|-------------------------------------|-----------------------------------|------------------|
| Group: Cardiovascular Disease |                                |                                                                                                                                |                                   |                                     |                                   |                  |
| Variable                      | Population                     | Eligible <sup>1</sup> (% popln)                                                                                                | Satisfy <sup>2</sup> (% eligible) | Elsewhere <sup>3</sup> (% eligible) | Achieve <sup>4</sup> (% eligible) |                  |
| <b>Sentence Status</b>        |                                |                                                                                                                                |                                   |                                     |                                   |                  |
| 2017/18                       | .                              | 81                                                                                                                             | <10 <sup>6</sup>                  | <10 <sup>6</sup>                    | <10 <sup>6</sup>                  | <10 <sup>6</sup> |
|                               | Absconded                      | <10 <sup>0</sup>                                                                                                               | <10 <sup>6</sup>                  | <10 <sup>6</sup>                    | <10 <sup>6</sup>                  | <10 <sup>6</sup> |
|                               | Active In                      | 15,872                                                                                                                         | 19 (0.1)                          | <10 <sup>6</sup>                    | <10 <sup>6</sup>                  | <10 <sup>6</sup> |
|                               | Active Out                     | 1,052                                                                                                                          | <10 <sup>6</sup>                  | <10 <sup>6</sup>                    | <10 <sup>6</sup>                  | <10 <sup>6</sup> |
|                               | Convicted Sentence             | 2,125                                                                                                                          | <10 <sup>6</sup>                  | <10 <sup>6</sup>                    | <10 <sup>6</sup>                  | <10 <sup>6</sup> |
|                               | Downgrade in security category | <10 <sup>0</sup>                                                                                                               | <10 <sup>6</sup>                  | <10 <sup>6</sup>                    | <10 <sup>6</sup>                  | <10 <sup>6</sup> |
|                               | Internal Cell Move             | <10 <sup>0</sup>                                                                                                               | <10 <sup>6</sup>                  | <10 <sup>6</sup>                    | <10 <sup>6</sup>                  | <10 <sup>6</sup> |
|                               | Judges Remand                  | 92                                                                                                                             | <10 <sup>6</sup>                  | <10 <sup>6</sup>                    | <10 <sup>6</sup>                  | <10 <sup>6</sup> |
|                               | Licence Revoke                 | 52                                                                                                                             | <10 <sup>6</sup>                  | <10 <sup>6</sup>                    | <10 <sup>6</sup>                  | <10 <sup>6</sup> |
|                               | On Remand                      | 1,492                                                                                                                          | <10 <sup>6</sup>                  | <10 <sup>6</sup>                    | <10 <sup>6</sup>                  | <10 <sup>6</sup> |
|                               | Transfer                       | 910                                                                                                                            | <10 <sup>6</sup>                  | <10 <sup>6</sup>                    | <10 <sup>6</sup>                  | <10 <sup>6</sup> |
|                               | Upgrade in security category   | <10 <sup>0</sup>                                                                                                               | <10 <sup>6</sup>                  | <10 <sup>6</sup>                    | <10 <sup>6</sup>                  | <10 <sup>6</sup> |
| 2018/19                       | .                              | 88                                                                                                                             | <10 <sup>6</sup>                  | <10 <sup>6</sup>                    | <10 <sup>6</sup>                  | <10 <sup>6</sup> |
|                               | Absconded                      | <10 <sup>0</sup>                                                                                                               | <10 <sup>6</sup>                  | <10 <sup>6</sup>                    | <10 <sup>6</sup>                  | <10 <sup>6</sup> |
|                               | Active In                      | 18,145                                                                                                                         | 20 (0.1)                          | 11 (55.0)                           | <10 <sup>6</sup>                  | 11 (55.0)        |
|                               | Active Out                     | 835                                                                                                                            | <10 <sup>6</sup>                  | <10 <sup>6</sup>                    | <10 <sup>6</sup>                  | <10 <sup>6</sup> |
|                               | Convicted Sentence             | 1,320                                                                                                                          | <10 <sup>6</sup>                  | <10 <sup>6</sup>                    | <10 <sup>6</sup>                  | <10 <sup>6</sup> |
|                               | Downgrade in security category | <10 <sup>0</sup>                                                                                                               | <10 <sup>6</sup>                  | <10 <sup>6</sup>                    | <10 <sup>6</sup>                  | <10 <sup>6</sup> |
|                               | Internal Cell Move             | <10 <sup>0</sup>                                                                                                               | <10 <sup>6</sup>                  | <10 <sup>6</sup>                    | <10 <sup>6</sup>                  | <10 <sup>6</sup> |
|                               | Judges Remand                  | <10 <sup>0</sup>                                                                                                               | <10 <sup>6</sup>                  | <10 <sup>6</sup>                    | <10 <sup>6</sup>                  | <10 <sup>6</sup> |
|                               | Licence Revoke                 | 125                                                                                                                            | <10 <sup>6</sup>                  | <10 <sup>6</sup>                    | <10 <sup>6</sup>                  | <10 <sup>6</sup> |
|                               | On Remand                      | 1,059                                                                                                                          | <10 <sup>6</sup>                  | <10 <sup>6</sup>                    | <10 <sup>6</sup>                  | <10 <sup>6</sup> |
|                               | Transfer                       | 518                                                                                                                            | <10 <sup>6</sup>                  | <10 <sup>6</sup>                    | <10 <sup>6</sup>                  | <10 <sup>6</sup> |
|                               | Upgrade in security category   | <10 <sup>0</sup>                                                                                                               | <10 <sup>6</sup>                  | <10 <sup>6</sup>                    | <10 <sup>6</sup>                  | <10 <sup>6</sup> |
| 2019/20                       | .                              | 69                                                                                                                             | <10 <sup>6</sup>                  | <10 <sup>6</sup>                    | <10 <sup>6</sup>                  | <10 <sup>6</sup> |
|                               | Absconded                      | <10 <sup>0</sup>                                                                                                               | <10 <sup>6</sup>                  | <10 <sup>6</sup>                    | <10 <sup>6</sup>                  | <10 <sup>6</sup> |
|                               | Active In                      | 22,424                                                                                                                         | 21 (0.1)                          | 12 (57.1)                           | <10 <sup>6</sup>                  | 12 (57.1)        |
|                               | Active Out                     | 625                                                                                                                            | <10 <sup>6</sup>                  | <10 <sup>6</sup>                    | <10 <sup>6</sup>                  | <10 <sup>6</sup> |
|                               | Convicted Sentence             | 1,361                                                                                                                          | <10 <sup>6</sup>                  | <10 <sup>6</sup>                    | <10 <sup>6</sup>                  | <10 <sup>6</sup> |
|                               | Downgrade in security category | <10 <sup>0</sup>                                                                                                               | <10 <sup>6</sup>                  | <10 <sup>6</sup>                    | <10 <sup>6</sup>                  | <10 <sup>6</sup> |
|                               | Internal Cell Move             | <10 <sup>0</sup>                                                                                                               | <10 <sup>6</sup>                  | <10 <sup>6</sup>                    | <10 <sup>6</sup>                  | <10 <sup>6</sup> |
|                               | Judges Remand                  | 19                                                                                                                             | <10 <sup>6</sup>                  | <10 <sup>6</sup>                    | <10 <sup>6</sup>                  | <10 <sup>6</sup> |
|                               | Licence Revoke                 | 178                                                                                                                            | <10 <sup>6</sup>                  | <10 <sup>6</sup>                    | <10 <sup>6</sup>                  | <10 <sup>6</sup> |
|                               | On Remand                      | 1,031                                                                                                                          | <10 <sup>6</sup>                  | <10 <sup>6</sup>                    | <10 <sup>6</sup>                  | <10 <sup>6</sup> |
|                               | Transfer                       | 101                                                                                                                            | <10 <sup>6</sup>                  | <10 <sup>6</sup>                    | <10 <sup>6</sup>                  | <10 <sup>6</sup> |
|                               | Upgrade in security category   | <10 <sup>0</sup>                                                                                                               | <10 <sup>6</sup>                  | <10 <sup>6</sup>                    | <10 <sup>6</sup>                  | <10 <sup>6</sup> |
| <b>Age - years</b>            |                                |                                                                                                                                |                                   |                                     |                                   |                  |
| 2017/18                       | 10 - <20                       | 468                                                                                                                            | <10 <sup>6</sup>                  | <10 <sup>6</sup>                    | <10 <sup>6</sup>                  | <10 <sup>6</sup> |
|                               | 20 - <30                       | 6,994                                                                                                                          | <10 <sup>6</sup>                  | <10 <sup>6</sup>                    | <10 <sup>6</sup>                  | <10 <sup>6</sup> |
|                               | 30 - <40                       | 7,051                                                                                                                          | <10 <sup>6</sup>                  | <10 <sup>6</sup>                    | <10 <sup>6</sup>                  | <10 <sup>6</sup> |
|                               | 40 - <50                       | 4,114                                                                                                                          | <10 <sup>6</sup>                  | <10 <sup>6</sup>                    | <10 <sup>6</sup>                  | <10 <sup>6</sup> |
|                               | 50 - <60                       | 2,107                                                                                                                          | <10 <sup>6</sup>                  | <10 <sup>6</sup>                    | <10 <sup>6</sup>                  | <10 <sup>6</sup> |
|                               | 60 - <70                       | 684                                                                                                                            | <10 <sup>6</sup>                  | <10 <sup>6</sup>                    | <10 <sup>6</sup>                  | <10 <sup>6</sup> |
|                               | 70 - <80                       | 213                                                                                                                            | <10 <sup>6</sup>                  | <10 <sup>6</sup>                    | <10 <sup>6</sup>                  | <10 <sup>6</sup> |
|                               | 80 - <90                       | 40                                                                                                                             | <10 <sup>6</sup>                  | <10 <sup>6</sup>                    | <10 <sup>6</sup>                  | <10 <sup>6</sup> |
|                               | 90 - <100                      | <10 <sup>0</sup>                                                                                                               | <10 <sup>6</sup>                  | <10 <sup>6</sup>                    | <10 <sup>6</sup>                  | <10 <sup>6</sup> |
|                               | 100 - <110                     | <10 <sup>0</sup>                                                                                                               | <10 <sup>6</sup>                  | <10 <sup>6</sup>                    | <10 <sup>6</sup>                  | <10 <sup>6</sup> |
| 2018/19                       | 10 - <20                       | 436                                                                                                                            | <10 <sup>6</sup>                  | <10 <sup>6</sup>                    | <10 <sup>6</sup>                  | <10 <sup>6</sup> |
|                               | 20 - <30                       | 7,163                                                                                                                          | <10 <sup>6</sup>                  | <10 <sup>6</sup>                    | <10 <sup>6</sup>                  | <10 <sup>6</sup> |
|                               | 30 - <40                       | 7,381                                                                                                                          | <10 <sup>6</sup>                  | <10 <sup>6</sup>                    | <10 <sup>6</sup>                  | <10 <sup>6</sup> |
|                               | 40 - <50                       | 4,180                                                                                                                          | <10 <sup>6</sup>                  | <10 <sup>6</sup>                    | <10 <sup>6</sup>                  | <10 <sup>6</sup> |
|                               | 50 - <60                       | 1,978                                                                                                                          | <10 <sup>6</sup>                  | <10 <sup>6</sup>                    | <10 <sup>6</sup>                  | <10 <sup>6</sup> |
|                               | 60 - <70                       | 701                                                                                                                            | <10 <sup>6</sup>                  | <10 <sup>6</sup>                    | <10 <sup>6</sup>                  | <10 <sup>6</sup> |
|                               | 70 - <80                       | 209                                                                                                                            | <10 <sup>6</sup>                  | <10 <sup>6</sup>                    | <10 <sup>6</sup>                  | <10 <sup>6</sup> |
|                               | 80 - <90                       | 45                                                                                                                             | <10 <sup>6</sup>                  | <10 <sup>6</sup>                    | <10 <sup>6</sup>                  | <10 <sup>6</sup> |
|                               | 90 - <100                      | <10 <sup>0</sup>                                                                                                               | <10 <sup>6</sup>                  | <10 <sup>6</sup>                    | <10 <sup>6</sup>                  | <10 <sup>6</sup> |
|                               | 100 - <110                     | <10 <sup>0</sup>                                                                                                               | <10 <sup>6</sup>                  | <10 <sup>6</sup>                    | <10 <sup>6</sup>                  | <10 <sup>6</sup> |
| 2019/20                       | 10 - <20                       | 404                                                                                                                            | <10 <sup>6</sup>                  | <10 <sup>6</sup>                    | <10 <sup>6</sup>                  | <10 <sup>6</sup> |
|                               | 20 - <30                       | 8,064                                                                                                                          | <10 <sup>6</sup>                  | <10 <sup>6</sup>                    | <10 <sup>6</sup>                  | <10 <sup>6</sup> |
|                               | 30 - <40                       | 9,125                                                                                                                          | <10 <sup>6</sup>                  | <10 <sup>6</sup>                    | <10 <sup>6</sup>                  | <10 <sup>6</sup> |
|                               | 40 - <50                       | 4,948                                                                                                                          | <10 <sup>6</sup>                  | <10 <sup>6</sup>                    | <10 <sup>6</sup>                  | <10 <sup>6</sup> |
|                               | 50 - <60                       | 2,224                                                                                                                          | <10 <sup>6</sup>                  | <10 <sup>6</sup>                    | <10 <sup>6</sup>                  | <10 <sup>6</sup> |
|                               | 60 - <70                       | 751                                                                                                                            | <10 <sup>6</sup>                  | <10 <sup>6</sup>                    | <10 <sup>6</sup>                  | <10 <sup>6</sup> |
|                               | 70 - <80                       | 238                                                                                                                            | <10 <sup>6</sup>                  | <10 <sup>6</sup>                    | <10 <sup>6</sup>                  | <10 <sup>6</sup> |
|                               | 80 - <90                       | 53                                                                                                                             | <10 <sup>6</sup>                  | <10 <sup>6</sup>                    | <10 <sup>6</sup>                  | <10 <sup>6</sup> |
|                               | 90 - <100                      | <10 <sup>0</sup>                                                                                                               | <10 <sup>6</sup>                  | <10 <sup>6</sup>                    | <10 <sup>6</sup>                  | <10 <sup>6</sup> |
|                               | 100 - <110                     | <10 <sup>0</sup>                                                                                                               | <10 <sup>6</sup>                  | <10 <sup>6</sup>                    | <10 <sup>6</sup>                  | <10 <sup>6</sup> |

<sup>1</sup>Eligible for indicator; <sup>2</sup>Achieve in current prison; <sup>3</sup>Achieve in previous prison; <sup>4</sup>Overall achievement - either current or previous prison; <sup>5</sup>Declined indicator; <sup>6</sup>Suppressed (<10) to avoid disclosure

| Indicator                      |                        | The proportion of people with persistent or paroxysmal atrial fibrillation and a CHA2DS2-VASc score in the preceding 12 months |                                   |                                     |                                   |                  |
|--------------------------------|------------------------|--------------------------------------------------------------------------------------------------------------------------------|-----------------------------------|-------------------------------------|-----------------------------------|------------------|
| Group: Cardiovascular Disease  |                        |                                                                                                                                |                                   |                                     |                                   |                  |
| Variable                       | Population             | Eligible <sup>1</sup> (% popln)                                                                                                | Satisfy <sup>2</sup> (% eligible) | Elsewhere <sup>3</sup> (% eligible) | Achieve <sup>4</sup> (% eligible) |                  |
| <b>Length of Stay (months)</b> |                        |                                                                                                                                |                                   |                                     |                                   |                  |
| 2017/18                        | <1                     | 4,474                                                                                                                          | <10 <sup>6</sup>                  | <10 <sup>6</sup>                    | <10 <sup>6</sup>                  | <10 <sup>6</sup> |
|                                | 1-<6                   | 8,075                                                                                                                          | <10 <sup>6</sup>                  | <10 <sup>6</sup>                    | <10 <sup>6</sup>                  | <10 <sup>6</sup> |
|                                | 6-<12                  | 3,672                                                                                                                          | <10 <sup>6</sup>                  | <10 <sup>6</sup>                    | <10 <sup>6</sup>                  | <10 <sup>6</sup> |
|                                | 12-<24                 | 2,832                                                                                                                          | <10 <sup>6</sup>                  | <10 <sup>6</sup>                    | <10 <sup>6</sup>                  | <10 <sup>6</sup> |
|                                | 24+                    | 2,624                                                                                                                          | 11 (0.4)                          | <10 <sup>6</sup>                    | <10 <sup>6</sup>                  | <10 <sup>6</sup> |
| 2018/19                        | <1                     | 4,801                                                                                                                          | <10 <sup>6</sup>                  | <10 <sup>6</sup>                    | <10 <sup>6</sup>                  | <10 <sup>6</sup> |
|                                | 1-<6                   | 7,742                                                                                                                          | <10 <sup>6</sup>                  | <10 <sup>6</sup>                    | <10 <sup>6</sup>                  | <10 <sup>6</sup> |
|                                | 6-<12                  | 3,616                                                                                                                          | <10 <sup>6</sup>                  | <10 <sup>6</sup>                    | <10 <sup>6</sup>                  | <10 <sup>6</sup> |
|                                | 12-<24                 | 3,447                                                                                                                          | <10 <sup>6</sup>                  | <10 <sup>6</sup>                    | <10 <sup>6</sup>                  | <10 <sup>6</sup> |
|                                | 24+                    | 2,493                                                                                                                          | 13 (0.5)                          | <10 <sup>6</sup>                    | <10 <sup>6</sup>                  | <10 <sup>6</sup> |
| 2019/20                        | <1                     | 5,745                                                                                                                          | <10 <sup>6</sup>                  | <10 <sup>6</sup>                    | <10 <sup>6</sup>                  | <10 <sup>6</sup> |
|                                | 1-<6                   | 9,697                                                                                                                          | <10 <sup>6</sup>                  | <10 <sup>6</sup>                    | <10 <sup>6</sup>                  | <10 <sup>6</sup> |
|                                | 6-<12                  | 5,090                                                                                                                          | <10 <sup>6</sup>                  | <10 <sup>6</sup>                    | <10 <sup>6</sup>                  | <10 <sup>6</sup> |
|                                | 12-<24                 | 3,244                                                                                                                          | <10 <sup>6</sup>                  | <10 <sup>6</sup>                    | <10 <sup>6</sup>                  | <10 <sup>6</sup> |
|                                | 24+                    | 2,035                                                                                                                          | 12 (0.6)                          | <10 <sup>6</sup>                    | <10 <sup>6</sup>                  | <10 <sup>6</sup> |
| <b>Ethnic Group</b>            |                        |                                                                                                                                |                                   |                                     |                                   |                  |
| 2017/18                        | White                  | 15,638                                                                                                                         | 22 (0.1)                          | <10 <sup>6</sup>                    | <10 <sup>6</sup>                  | <10 <sup>6</sup> |
|                                | Mixed                  | 431                                                                                                                            | <10 <sup>6</sup>                  | <10 <sup>6</sup>                    | <10 <sup>6</sup>                  | <10 <sup>6</sup> |
|                                | Asian or Asian British | 813                                                                                                                            | <10 <sup>6</sup>                  | <10 <sup>6</sup>                    | <10 <sup>6</sup>                  | <10 <sup>6</sup> |
|                                | Black or Black British | 404                                                                                                                            | <10 <sup>6</sup>                  | <10 <sup>6</sup>                    | <10 <sup>6</sup>                  | <10 <sup>6</sup> |
|                                | Chinese and Other      | 214                                                                                                                            | <10 <sup>6</sup>                  | <10 <sup>6</sup>                    | <10 <sup>6</sup>                  | <10 <sup>6</sup> |
|                                | Unclassified           | 372                                                                                                                            | <10 <sup>6</sup>                  | <10 <sup>6</sup>                    | <10 <sup>6</sup>                  | <10 <sup>6</sup> |
| 2018/19                        | White                  | 14,911                                                                                                                         | 23 (0.2)                          | 12 (52.2)                           | <10 <sup>6</sup>                  | 12 (52.2)        |
|                                | Mixed                  | 371                                                                                                                            | <10 <sup>6</sup>                  | <10 <sup>6</sup>                    | <10 <sup>6</sup>                  | <10 <sup>6</sup> |
|                                | Asian or Asian British | 726                                                                                                                            | <10 <sup>6</sup>                  | <10 <sup>6</sup>                    | <10 <sup>6</sup>                  | <10 <sup>6</sup> |
|                                | Black or Black British | 364                                                                                                                            | <10 <sup>6</sup>                  | <10 <sup>6</sup>                    | <10 <sup>6</sup>                  | <10 <sup>6</sup> |
|                                | Chinese and Other      | 167                                                                                                                            | <10 <sup>6</sup>                  | <10 <sup>6</sup>                    | <10 <sup>6</sup>                  | <10 <sup>6</sup> |
|                                | Unclassified           | 409                                                                                                                            | <10 <sup>6</sup>                  | <10 <sup>6</sup>                    | <10 <sup>6</sup>                  | <10 <sup>6</sup> |
| 2019/20                        | White                  | 16,606                                                                                                                         | 23 (0.1)                          | 14 (60.9)                           | <10 <sup>6</sup>                  | 14 (60.9)        |
|                                | Mixed                  | 409                                                                                                                            | <10 <sup>6</sup>                  | <10 <sup>6</sup>                    | <10 <sup>6</sup>                  | <10 <sup>6</sup> |
|                                | Asian or Asian British | 755                                                                                                                            | <10 <sup>6</sup>                  | <10 <sup>6</sup>                    | <10 <sup>6</sup>                  | <10 <sup>6</sup> |
|                                | Black or Black British | 451                                                                                                                            | <10 <sup>6</sup>                  | <10 <sup>6</sup>                    | <10 <sup>6</sup>                  | <10 <sup>6</sup> |
|                                | Chinese and Other      | 163                                                                                                                            | <10 <sup>6</sup>                  | <10 <sup>6</sup>                    | <10 <sup>6</sup>                  | <10 <sup>6</sup> |
|                                | Unclassified           | 387                                                                                                                            | <10 <sup>6</sup>                  | <10 <sup>6</sup>                    | <10 <sup>6</sup>                  | <10 <sup>6</sup> |

<sup>1</sup>Eligible for indicator; <sup>2</sup>Achieve in current prison; <sup>3</sup>Achieve in previous prison; <sup>4</sup>Overall achievement - either current or previous prison; <sup>5</sup>Declined indicator; <sup>6</sup>Suppressed (<10) to avoid disclosure

| Indicator              | The proportion of people aged 79 years or under, with coronary heart disease, hypertension, stroke, transient ischaemic attack or peripheral arterial disease, who have had a blood pressure of 140/90mmHg or less in the preceding 12 months |            |                                 |                                   |                                     |                                   | Community achievement 2019/20: CHD: 77.77%, Hypertension: 67.28%, Stroke/TIA: 73.92%, PAD not recorded |
|------------------------|-----------------------------------------------------------------------------------------------------------------------------------------------------------------------------------------------------------------------------------------------|------------|---------------------------------|-----------------------------------|-------------------------------------|-----------------------------------|--------------------------------------------------------------------------------------------------------|
|                        | Group: Cardiovascular Disease                                                                                                                                                                                                                 | Population | Eligible <sup>1</sup> (% popln) | Satisfy <sup>2</sup> (% eligible) | Elsewhere <sup>3</sup> (% eligible) | Achieve <sup>4</sup> (% eligible) |                                                                                                        |
| <b>Year</b>            |                                                                                                                                                                                                                                               |            |                                 |                                   |                                     |                                   |                                                                                                        |
|                        | 2017/18                                                                                                                                                                                                                                       | 21,677     | 989 (4.6)                       | 457 (46.2)                        | <10 <sup>6</sup>                    | 465 (47.0)                        |                                                                                                        |
|                        | 2018/19                                                                                                                                                                                                                                       | 22,099     | 1,103 (5.0)                     | 491 (44.5)                        | 19 (1.7)                            | 510 (46.2)                        |                                                                                                        |
|                        | 2019/20                                                                                                                                                                                                                                       | 25,811     | 1,311 (5.1)                     | 543 (41.4)                        | 43 (3.3)                            | 586 (44.7)                        |                                                                                                        |
| <b>Prison</b>          |                                                                                                                                                                                                                                               |            |                                 |                                   |                                     |                                   |                                                                                                        |
| 2017/18                | Prison 1                                                                                                                                                                                                                                      | 1,323      | 69 (5.2)                        | 33 (47.8)                         | <10 <sup>6</sup>                    | 34 (49.3)                         |                                                                                                        |
|                        | Prison 2                                                                                                                                                                                                                                      | 3,261      | 114 (3.5)                       | 42 (36.8)                         | <10 <sup>6</sup>                    | 42 (36.8)                         |                                                                                                        |
|                        | Prison 3                                                                                                                                                                                                                                      | 2,623      | 81 (3.1)                        | 30 (37.0)                         | <10 <sup>6</sup>                    | 31 (38.3)                         |                                                                                                        |
|                        | Prison 4                                                                                                                                                                                                                                      | 2,089      | 113 (5.4)                       | 57 (50.4)                         | <10 <sup>6</sup>                    | 61 (54.0)                         |                                                                                                        |
|                        | Prison 5                                                                                                                                                                                                                                      | 637        | 32 (5.0)                        | 20 (62.5)                         | <10 <sup>6</sup>                    | 20 (62.5)                         |                                                                                                        |
|                        | Prison 6                                                                                                                                                                                                                                      | 1,552      | 85 (5.5)                        | 54 (63.5)                         | <10 <sup>6</sup>                    | 54 (63.5)                         |                                                                                                        |
|                        | Prison 7                                                                                                                                                                                                                                      | 635        | 31 (4.9)                        | 14 (45.2)                         | <10 <sup>6</sup>                    | 15 (48.4)                         |                                                                                                        |
|                        | Prison 8                                                                                                                                                                                                                                      | 1,085      | 49 (4.5)                        | 31 (63.3)                         | <10 <sup>6</sup>                    | 31 (63.3)                         |                                                                                                        |
|                        | Prison 9                                                                                                                                                                                                                                      | 981        | 125 (12.7)                      | 52 (41.6)                         | <10 <sup>6</sup>                    | 52 (41.6)                         |                                                                                                        |
|                        | Prison 10                                                                                                                                                                                                                                     | 2,523      | 126 (5.0)                       | 64 (50.8)                         | <10 <sup>6</sup>                    | 64 (50.8)                         |                                                                                                        |
|                        | Prison 11                                                                                                                                                                                                                                     | 3,470      | 99 (2.9)                        | 31 (31.3)                         | <10 <sup>6</sup>                    | 31 (31.3)                         |                                                                                                        |
|                        | Prison 12                                                                                                                                                                                                                                     | 815        | <10 <sup>6</sup>                | <10 <sup>6</sup>                  | <10 <sup>6</sup>                    | <10 <sup>6</sup>                  |                                                                                                        |
|                        | Prison 13                                                                                                                                                                                                                                     | 683        | 65 (9.5)                        | 29 (44.6)                         | <10 <sup>6</sup>                    | 30 (46.2)                         |                                                                                                        |
| 2018/19                | Prison 1                                                                                                                                                                                                                                      | 1,333      | 58 (4.4)                        | 32 (55.2)                         | <10 <sup>6</sup>                    | 33 (56.9)                         |                                                                                                        |
|                        | Prison 2                                                                                                                                                                                                                                      | 2,705      | 89 (3.3)                        | 30 (33.7)                         | <10 <sup>6</sup>                    | 31 (34.8)                         |                                                                                                        |
|                        | Prison 3                                                                                                                                                                                                                                      | 2,522      | 91 (3.6)                        | 25 (27.5)                         | <10 <sup>6</sup>                    | 26 (28.6)                         |                                                                                                        |
|                        | Prison 4                                                                                                                                                                                                                                      | 2,349      | 141 (6.0)                       | 78 (55.3)                         | <10 <sup>6</sup>                    | 84 (59.6)                         |                                                                                                        |
|                        | Prison 5                                                                                                                                                                                                                                      | 676        | 43 (6.4)                        | 26 (60.5)                         | <10 <sup>6</sup>                    | 27 (62.8)                         |                                                                                                        |
|                        | Prison 6                                                                                                                                                                                                                                      | 1,513      | 82 (5.4)                        | 51 (62.2)                         | <10 <sup>6</sup>                    | 51 (62.2)                         |                                                                                                        |
|                        | Prison 7                                                                                                                                                                                                                                      | 654        | 48 (7.3)                        | 21 (43.8)                         | <10 <sup>6</sup>                    | 21 (43.8)                         |                                                                                                        |
|                        | Prison 8                                                                                                                                                                                                                                      | 1,148      | 60 (5.2)                        | 43 (71.7)                         | <10 <sup>6</sup>                    | 45 (75.0)                         |                                                                                                        |
|                        | Prison 9                                                                                                                                                                                                                                      | 996        | 125 (12.6)                      | 43 (34.4)                         | <10 <sup>6</sup>                    | 47 (37.6)                         |                                                                                                        |
|                        | Prison 10                                                                                                                                                                                                                                     | 2,717      | 133 (4.9)                       | 70 (52.6)                         | <10 <sup>6</sup>                    | 70 (52.6)                         |                                                                                                        |
|                        | Prison 11                                                                                                                                                                                                                                     | 4,020      | 150 (3.7)                       | 46 (30.7)                         | <10 <sup>6</sup>                    | 46 (30.7)                         |                                                                                                        |
|                        | Prison 12                                                                                                                                                                                                                                     | 792        | <10 <sup>6</sup>                | <10 <sup>6</sup>                  | <10 <sup>6</sup>                    | <10 <sup>6</sup>                  |                                                                                                        |
|                        | Prison 13                                                                                                                                                                                                                                     | 674        | 80 (11.9)                       | 25 (31.3)                         | <10 <sup>6</sup>                    | 28 (35.0)                         |                                                                                                        |
| 2019/20                | Prison 1                                                                                                                                                                                                                                      | 1,410      | 64 (4.5)                        | 29 (45.3)                         | <10 <sup>6</sup>                    | 32 (50.0)                         |                                                                                                        |
|                        | Prison 2                                                                                                                                                                                                                                      | 2,979      | 100 (3.4)                       | 26 (26.0)                         | <10 <sup>6</sup>                    | 28 (28.0)                         |                                                                                                        |
|                        | Prison 3                                                                                                                                                                                                                                      | 2,809      | 107 (3.8)                       | 50 (46.7)                         | <10 <sup>6</sup>                    | 53 (49.5)                         |                                                                                                        |
|                        | Prison 4                                                                                                                                                                                                                                      | 2,651      | 239 (9.0)                       | 88 (36.8)                         | 15 (6.3)                            | 103 (43.1)                        |                                                                                                        |
|                        | Prison 5                                                                                                                                                                                                                                      | 616        | 39 (6.3)                        | 18 (46.2)                         | <10 <sup>6</sup>                    | 18 (46.2)                         |                                                                                                        |
|                        | Prison 6                                                                                                                                                                                                                                      | 1,533      | 79 (5.2)                        | 41 (51.9)                         | <10 <sup>6</sup>                    | 41 (51.9)                         |                                                                                                        |
|                        | Prison 7                                                                                                                                                                                                                                      | 860        | 47 (5.5)                        | 29 (61.7)                         | <10 <sup>6</sup>                    | 29 (61.7)                         |                                                                                                        |
|                        | Prison 8                                                                                                                                                                                                                                      | 1,385      | 62 (4.5)                        | 40 (64.5)                         | <10 <sup>6</sup>                    | 41 (66.1)                         |                                                                                                        |
|                        | Prison 9                                                                                                                                                                                                                                      | 1,092      | 155 (14.2)                      | 52 (33.5)                         | <10 <sup>6</sup>                    | 60 (38.7)                         |                                                                                                        |
|                        | Prison 10                                                                                                                                                                                                                                     | 3,577      | 160 (4.5)                       | 90 (56.3)                         | <10 <sup>6</sup>                    | 92 (57.5)                         |                                                                                                        |
|                        | Prison 11                                                                                                                                                                                                                                     | 5,348      | 174 (3.3)                       | 45 (25.9)                         | <10 <sup>6</sup>                    | 47 (27.0)                         |                                                                                                        |
|                        | Prison 12                                                                                                                                                                                                                                     | 805        | <10 <sup>6</sup>                | <10 <sup>6</sup>                  | <10 <sup>6</sup>                    | <10 <sup>6</sup>                  |                                                                                                        |
|                        | Prison 13                                                                                                                                                                                                                                     | 746        | 84 (11.3)                       | 34 (40.5)                         | <10 <sup>6</sup>                    | 41 (48.8)                         |                                                                                                        |
| <b>Prison category</b> |                                                                                                                                                                                                                                               |            |                                 |                                   |                                     |                                   |                                                                                                        |
| 2017/18                | A                                                                                                                                                                                                                                             | 1,664      | 190 (11.4)                      | 81 (42.6)                         | <10 <sup>6</sup>                    | 82 (43.2)                         |                                                                                                        |
|                        | B                                                                                                                                                                                                                                             | 9,254      | 339 (3.7)                       | 137 (40.4)                        | <10 <sup>6</sup>                    | 137 (40.4)                        |                                                                                                        |
|                        | C                                                                                                                                                                                                                                             | 6,035      | 263 (4.4)                       | 120 (45.6)                        | <10 <sup>6</sup>                    | 126 (47.9)                        |                                                                                                        |
|                        | Closed                                                                                                                                                                                                                                        | 1,720      | 80 (4.7)                        | 45 (56.3)                         | <10 <sup>6</sup>                    | 46 (57.5)                         |                                                                                                        |
|                        | D                                                                                                                                                                                                                                             | 2,189      | 117 (5.3)                       | 74 (63.2)                         | <10 <sup>6</sup>                    | 74 (63.2)                         |                                                                                                        |
|                        | YOI                                                                                                                                                                                                                                           | 815        | <10 <sup>6</sup>                | <10 <sup>6</sup>                  | <10 <sup>6</sup>                    | <10 <sup>6</sup>                  |                                                                                                        |
| 2018/19                | A                                                                                                                                                                                                                                             | 1,670      | 205 (12.3)                      | 68 (33.2)                         | <10 <sup>6</sup>                    | 75 (36.6)                         |                                                                                                        |
|                        | B                                                                                                                                                                                                                                             | 9,442      | 372 (3.9)                       | 146 (39.2)                        | <10 <sup>6</sup>                    | 147 (39.5)                        |                                                                                                        |
|                        | C                                                                                                                                                                                                                                             | 6,204      | 290 (4.7)                       | 135 (46.6)                        | <10 <sup>6</sup>                    | 143 (49.3)                        |                                                                                                        |
|                        | Closed                                                                                                                                                                                                                                        | 1,802      | 108 (6.0)                       | 64 (59.3)                         | <10 <sup>6</sup>                    | 66 (61.1)                         |                                                                                                        |
|                        | D                                                                                                                                                                                                                                             | 2,189      | 125 (5.7)                       | 77 (61.6)                         | <10 <sup>6</sup>                    | 78 (62.4)                         |                                                                                                        |
|                        | YOI                                                                                                                                                                                                                                           | 792        | <10 <sup>6</sup>                | <10 <sup>6</sup>                  | <10 <sup>6</sup>                    | <10 <sup>6</sup>                  |                                                                                                        |
| 2019/20                | A                                                                                                                                                                                                                                             | 1,838      | 239 (13.0)                      | 86 (36.0)                         | 15 (6.3)                            | 101 (42.3)                        |                                                                                                        |
|                        | B                                                                                                                                                                                                                                             | 11,904     | 434 (3.6)                       | 161 (37.1)                        | <10 <sup>6</sup>                    | 167 (38.5)                        |                                                                                                        |
|                        | C                                                                                                                                                                                                                                             | 6,870      | 410 (6.0)                       | 167 (40.7)                        | 21 (5.1)                            | 188 (45.9)                        |                                                                                                        |
|                        | Closed                                                                                                                                                                                                                                        | 2,245      | 109 (4.9)                       | 69 (63.3)                         | <10 <sup>6</sup>                    | 70 (64.2)                         |                                                                                                        |
|                        | D                                                                                                                                                                                                                                             | 2,149      | 118 (5.5)                       | 59 (50.0)                         | <10 <sup>6</sup>                    | 59 (50.0)                         |                                                                                                        |
|                        | YOI                                                                                                                                                                                                                                           | 805        | <10 <sup>6</sup>                | <10 <sup>6</sup>                  | <10 <sup>6</sup>                    | <10 <sup>6</sup>                  |                                                                                                        |
| <b>Gender</b>          |                                                                                                                                                                                                                                               |            |                                 |                                   |                                     |                                   |                                                                                                        |
| 2017/18                | F                                                                                                                                                                                                                                             | 1,699      | 78 (4.6)                        | 45 (57.7)                         | <10 <sup>6</sup>                    | 46 (59.0)                         |                                                                                                        |
|                        | M                                                                                                                                                                                                                                             | 19,977     | 911 (4.6)                       | 412 (45.2)                        | <10 <sup>6</sup>                    | 419 (46.0)                        |                                                                                                        |
| 2018/19                | F                                                                                                                                                                                                                                             | 1,802      | 107 (5.9)                       | 63 (58.9)                         | <10 <sup>6</sup>                    | 65 (60.7)                         |                                                                                                        |
|                        | M                                                                                                                                                                                                                                             | 20,295     | 996 (4.9)                       | 428 (43.0)                        | 17 (1.7)                            | 445 (44.7)                        |                                                                                                        |
| 2019/20                | F                                                                                                                                                                                                                                             | 1,376      | 62 (4.5)                        | 40 (64.5)                         | <10 <sup>6</sup>                    | 41 (66.1)                         |                                                                                                        |
|                        | M                                                                                                                                                                                                                                             | 23,570     | 1,202 (5.1)                     | 475 (39.5)                        | 42 (3.5)                            | 517 (43.0)                        |                                                                                                        |

<sup>1</sup>Eligible for indicator; <sup>2</sup>Achieve in current prison; <sup>3</sup>Achieve in previous prison; <sup>4</sup>Overall achievement - either current or previous prison; <sup>5</sup>Declined indicator; <sup>6</sup>Suppressed (<10) to avoid disclosure

| Indicator              | The proportion of people aged 79 years or under, with coronary heart disease, hypertension, stroke, transient ischaemic attack or peripheral arterial disease, who have had a blood pressure of 140/90mmHg or less in the preceding 12 months |                  |                                 |                                   |                                     | Community achievement 2019/20: CHD: 77.77%, Hypertension: 67.28%, Stroke/TIA: 73.92%, PAD not recorded |                                   |
|------------------------|-----------------------------------------------------------------------------------------------------------------------------------------------------------------------------------------------------------------------------------------------|------------------|---------------------------------|-----------------------------------|-------------------------------------|--------------------------------------------------------------------------------------------------------|-----------------------------------|
|                        | Group: Cardiovascular Disease                                                                                                                                                                                                                 |                  |                                 |                                   |                                     |                                                                                                        |                                   |
|                        | Variable                                                                                                                                                                                                                                      | Population       | Eligible <sup>1</sup> (% popln) | Satisfy <sup>2</sup> (% eligible) | Elsewhere <sup>3</sup> (% eligible) |                                                                                                        | Achieve <sup>4</sup> (% eligible) |
| <b>Sentence Status</b> |                                                                                                                                                                                                                                               |                  |                                 |                                   |                                     |                                                                                                        |                                   |
| 2017/18                | .                                                                                                                                                                                                                                             | 81               | <10 <sup>6</sup>                | <10 <sup>6</sup>                  | <10 <sup>6</sup>                    | <10 <sup>6</sup>                                                                                       |                                   |
|                        | Absconded                                                                                                                                                                                                                                     | <10 <sup>6</sup> | <10 <sup>6</sup>                | <10 <sup>6</sup>                  | <10 <sup>6</sup>                    | <10 <sup>6</sup>                                                                                       |                                   |
|                        | Active In                                                                                                                                                                                                                                     | 15,872           | 751 (4.7)                       | 349 (46.5)                        | <10 <sup>6</sup>                    | 357 (47.5)                                                                                             |                                   |
|                        | Active Out                                                                                                                                                                                                                                    | 1,052            | 47 (4.5)                        | 23 (48.9)                         | <10 <sup>6</sup>                    | 23 (48.9)                                                                                              |                                   |
|                        | Convicted Sentence                                                                                                                                                                                                                            | 2,125            | 76 (3.6)                        | 25 (32.9)                         | <10 <sup>6</sup>                    | 25 (32.9)                                                                                              |                                   |
|                        | Downgrade in security category                                                                                                                                                                                                                | <10 <sup>6</sup> | <10 <sup>6</sup>                | <10 <sup>6</sup>                  | <10 <sup>6</sup>                    | <10 <sup>6</sup>                                                                                       |                                   |
|                        | Internal Cell Move                                                                                                                                                                                                                            | <10 <sup>6</sup> | <10 <sup>6</sup>                | <10 <sup>6</sup>                  | <10 <sup>6</sup>                    | <10 <sup>6</sup>                                                                                       |                                   |
|                        | Judges Remand                                                                                                                                                                                                                                 | 92               | <10 <sup>6</sup>                | <10 <sup>6</sup>                  | <10 <sup>6</sup>                    | <10 <sup>6</sup>                                                                                       |                                   |
|                        | Licence Revoke                                                                                                                                                                                                                                | 52               | <10 <sup>6</sup>                | <10 <sup>6</sup>                  | <10 <sup>6</sup>                    | <10 <sup>6</sup>                                                                                       |                                   |
|                        | On Remand                                                                                                                                                                                                                                     | 1,492            | 53 (3.6)                        | 25 (47.2)                         | <10 <sup>6</sup>                    | 25 (47.2)                                                                                              |                                   |
|                        | Transfer                                                                                                                                                                                                                                      | 910              | 52 (5.7)                        | 32 (61.5)                         | <10 <sup>6</sup>                    | 32 (61.5)                                                                                              |                                   |
|                        | Upgrade in security category                                                                                                                                                                                                                  | <10 <sup>6</sup> | <10 <sup>6</sup>                | <10 <sup>6</sup>                  | <10 <sup>6</sup>                    | <10 <sup>6</sup>                                                                                       |                                   |
| 2018/19                | .                                                                                                                                                                                                                                             | 88               | <10 <sup>6</sup>                | <10 <sup>6</sup>                  | <10 <sup>6</sup>                    | <10 <sup>6</sup>                                                                                       |                                   |
|                        | Absconded                                                                                                                                                                                                                                     | <10 <sup>6</sup> | <10 <sup>6</sup>                | <10 <sup>6</sup>                  | <10 <sup>6</sup>                    | <10 <sup>6</sup>                                                                                       |                                   |
|                        | Active In                                                                                                                                                                                                                                     | 18,145           | 939 (5.2)                       | 421 (44.8)                        | 17 (1.8)                            | 438 (46.6)                                                                                             |                                   |
|                        | Active Out                                                                                                                                                                                                                                    | 835              | 46 (5.5)                        | 24 (52.2)                         | <10 <sup>6</sup>                    | 25 (54.3)                                                                                              |                                   |
|                        | Convicted Sentence                                                                                                                                                                                                                            | 1,320            | 38 (2.9)                        | 12 (31.6)                         | <10 <sup>6</sup>                    | 13 (34.2)                                                                                              |                                   |
|                        | Downgrade in security category                                                                                                                                                                                                                | <10 <sup>6</sup> | <10 <sup>6</sup>                | <10 <sup>6</sup>                  | <10 <sup>6</sup>                    | <10 <sup>6</sup>                                                                                       |                                   |
|                        | Internal Cell Move                                                                                                                                                                                                                            | <10 <sup>6</sup> | <10 <sup>6</sup>                | <10 <sup>6</sup>                  | <10 <sup>6</sup>                    | <10 <sup>6</sup>                                                                                       |                                   |
|                        | Judges Remand                                                                                                                                                                                                                                 | <10 <sup>6</sup> | <10 <sup>6</sup>                | <10 <sup>6</sup>                  | <10 <sup>6</sup>                    | <10 <sup>6</sup>                                                                                       |                                   |
|                        | Licence Revoke                                                                                                                                                                                                                                | 125              | <10 <sup>6</sup>                | <10 <sup>6</sup>                  | <10 <sup>6</sup>                    | <10 <sup>6</sup>                                                                                       |                                   |
|                        | On Remand                                                                                                                                                                                                                                     | 1,059            | 46 (4.3)                        | 16 (34.8)                         | <10 <sup>6</sup>                    | 16 (34.8)                                                                                              |                                   |
|                        | Transfer                                                                                                                                                                                                                                      | 518              | 28 (5.4)                        | 17 (60.7)                         | <10 <sup>6</sup>                    | 17 (60.7)                                                                                              |                                   |
|                        | Upgrade in security category                                                                                                                                                                                                                  | <10 <sup>6</sup> | <10 <sup>6</sup>                | <10 <sup>6</sup>                  | <10 <sup>6</sup>                    | <10 <sup>6</sup>                                                                                       |                                   |
| 2019/20                | .                                                                                                                                                                                                                                             | 69               | <10 <sup>6</sup>                | <10 <sup>6</sup>                  | <10 <sup>6</sup>                    | <10 <sup>6</sup>                                                                                       |                                   |
|                        | Absconded                                                                                                                                                                                                                                     | <10 <sup>6</sup> | <10 <sup>6</sup>                | <10 <sup>6</sup>                  | <10 <sup>6</sup>                    | <10 <sup>6</sup>                                                                                       |                                   |
|                        | Active In                                                                                                                                                                                                                                     | 22,424           | 1,187 (5.3)                     | 505 (42.5)                        | 42 (3.5)                            | 547 (46.1)                                                                                             |                                   |
|                        | Active Out                                                                                                                                                                                                                                    | 625              | 29 (4.6)                        | <10 <sup>6</sup>                  | <10 <sup>6</sup>                    | <10 <sup>6</sup>                                                                                       |                                   |
|                        | Convicted Sentence                                                                                                                                                                                                                            | 1,361            | 45 (3.3)                        | 12 (26.7)                         | <10 <sup>6</sup>                    | 12 (26.7)                                                                                              |                                   |
|                        | Downgrade in security category                                                                                                                                                                                                                | <10 <sup>6</sup> | <10 <sup>6</sup>                | <10 <sup>6</sup>                  | <10 <sup>6</sup>                    | <10 <sup>6</sup>                                                                                       |                                   |
|                        | Internal Cell Move                                                                                                                                                                                                                            | <10 <sup>6</sup> | <10 <sup>6</sup>                | <10 <sup>6</sup>                  | <10 <sup>6</sup>                    | <10 <sup>6</sup>                                                                                       |                                   |
|                        | Judges Remand                                                                                                                                                                                                                                 | 19               | <10 <sup>6</sup>                | <10 <sup>6</sup>                  | <10 <sup>6</sup>                    | <10 <sup>6</sup>                                                                                       |                                   |
|                        | Licence Revoke                                                                                                                                                                                                                                | 178              | <10 <sup>6</sup>                | <10 <sup>6</sup>                  | <10 <sup>6</sup>                    | <10 <sup>6</sup>                                                                                       |                                   |
|                        | On Remand                                                                                                                                                                                                                                     | 1,031            | 37 (3.6)                        | 11 (29.7)                         | <10 <sup>6</sup>                    | 12 (32.4)                                                                                              |                                   |
|                        | Transfer                                                                                                                                                                                                                                      | 101              | <10 <sup>6</sup>                | <10 <sup>6</sup>                  | <10 <sup>6</sup>                    | <10 <sup>6</sup>                                                                                       |                                   |
|                        | Upgrade in security category                                                                                                                                                                                                                  | <10 <sup>6</sup> | <10 <sup>6</sup>                | <10 <sup>6</sup>                  | <10 <sup>6</sup>                    | <10 <sup>6</sup>                                                                                       |                                   |
| <b>Age - years</b>     |                                                                                                                                                                                                                                               |                  |                                 |                                   |                                     |                                                                                                        |                                   |
| 2017/18                | 10 - <20                                                                                                                                                                                                                                      | 468              | <10 <sup>6</sup>                | <10 <sup>6</sup>                  | <10 <sup>6</sup>                    | <10 <sup>6</sup>                                                                                       |                                   |
|                        | 20 - <30                                                                                                                                                                                                                                      | 6,994            | 30 (0.4)                        | 19 (63.3)                         | <10 <sup>6</sup>                    | 21 (70.0)                                                                                              |                                   |
|                        | 30 - <40                                                                                                                                                                                                                                      | 7,051            | 120 (1.7)                       | 57 (47.5)                         | <10 <sup>6</sup>                    | 57 (47.5)                                                                                              |                                   |
|                        | 40 - <50                                                                                                                                                                                                                                      | 4,114            | 264 (6.4)                       | 115 (43.6)                        | <10 <sup>6</sup>                    | 117 (44.3)                                                                                             |                                   |
|                        | 50 - <60                                                                                                                                                                                                                                      | 2,107            | 323 (15.3)                      | 149 (46.1)                        | <10 <sup>6</sup>                    | 152 (47.1)                                                                                             |                                   |
|                        | 60 - <70                                                                                                                                                                                                                                      | 684              | 180 (26.3)                      | 88 (48.9)                         | <10 <sup>6</sup>                    | 89 (49.4)                                                                                              |                                   |
|                        | 70 - <80                                                                                                                                                                                                                                      | 213              | 71 (33.3)                       | 28 (39.4)                         | <10 <sup>6</sup>                    | 28 (39.4)                                                                                              |                                   |
|                        | 80 - <90                                                                                                                                                                                                                                      | 40               | <10 <sup>6</sup>                | <10 <sup>6</sup>                  | <10 <sup>6</sup>                    | <10 <sup>6</sup>                                                                                       |                                   |
|                        | 90 - <100                                                                                                                                                                                                                                     | <10 <sup>6</sup> | <10 <sup>6</sup>                | <10 <sup>6</sup>                  | <10 <sup>6</sup>                    | <10 <sup>6</sup>                                                                                       |                                   |
|                        | 100 - <110                                                                                                                                                                                                                                    | <10 <sup>6</sup> | <10 <sup>6</sup>                | <10 <sup>6</sup>                  | <10 <sup>6</sup>                    | <10 <sup>6</sup>                                                                                       |                                   |
| 2018/19                | 10 - <20                                                                                                                                                                                                                                      | 436              | <10 <sup>6</sup>                | <10 <sup>6</sup>                  | <10 <sup>6</sup>                    | <10 <sup>6</sup>                                                                                       |                                   |
|                        | 20 - <30                                                                                                                                                                                                                                      | 7,163            | 46 (0.6)                        | 22 (47.8)                         | <10 <sup>6</sup>                    | 24 (52.2)                                                                                              |                                   |
|                        | 30 - <40                                                                                                                                                                                                                                      | 7,381            | 157 (2.1)                       | 77 (49.0)                         | <10 <sup>6</sup>                    | 80 (51.0)                                                                                              |                                   |
|                        | 40 - <50                                                                                                                                                                                                                                      | 4,180            | 284 (6.8)                       | 126 (44.4)                        | <10 <sup>6</sup>                    | 131 (46.1)                                                                                             |                                   |
|                        | 50 - <60                                                                                                                                                                                                                                      | 1,978            | 344 (17.4)                      | 158 (45.9)                        | <10 <sup>6</sup>                    | 162 (47.1)                                                                                             |                                   |
|                        | 60 - <70                                                                                                                                                                                                                                      | 701              | 196 (28.0)                      | 78 (39.8)                         | <10 <sup>6</sup>                    | 80 (40.8)                                                                                              |                                   |
|                        | 70 - <80                                                                                                                                                                                                                                      | 209              | 76 (36.4)                       | 30 (39.5)                         | <10 <sup>6</sup>                    | 33 (43.4)                                                                                              |                                   |
|                        | 80 - <90                                                                                                                                                                                                                                      | 45               | <10 <sup>6</sup>                | <10 <sup>6</sup>                  | <10 <sup>6</sup>                    | <10 <sup>6</sup>                                                                                       |                                   |
|                        | 90 - <100                                                                                                                                                                                                                                     | <10 <sup>6</sup> | <10 <sup>6</sup>                | <10 <sup>6</sup>                  | <10 <sup>6</sup>                    | <10 <sup>6</sup>                                                                                       |                                   |
|                        | 100 - <110                                                                                                                                                                                                                                    | <10 <sup>6</sup> | <10 <sup>6</sup>                | <10 <sup>6</sup>                  | <10 <sup>6</sup>                    | <10 <sup>6</sup>                                                                                       |                                   |
| 2019/20                | 10 - <20                                                                                                                                                                                                                                      | 404              | <10 <sup>6</sup>                | <10 <sup>6</sup>                  | <10 <sup>6</sup>                    | <10 <sup>6</sup>                                                                                       |                                   |
|                        | 20 - <30                                                                                                                                                                                                                                      | 8,064            | 56 (0.7)                        | 25 (44.6)                         | <10 <sup>6</sup>                    | 27 (48.2)                                                                                              |                                   |
|                        | 30 - <40                                                                                                                                                                                                                                      | 9,125            | 207 (2.3)                       | 101 (48.8)                        | <10 <sup>6</sup>                    | 110 (53.1)                                                                                             |                                   |
|                        | 40 - <50                                                                                                                                                                                                                                      | 4,948            | 310 (6.3)                       | 130 (41.9)                        | <10 <sup>6</sup>                    | 137 (44.2)                                                                                             |                                   |
|                        | 50 - <60                                                                                                                                                                                                                                      | 2,224            | 423 (19.0)                      | 166 (39.2)                        | 15 (3.5)                            | 181 (42.8)                                                                                             |                                   |
|                        | 60 - <70                                                                                                                                                                                                                                      | 751              | 220 (29.3)                      | 84 (38.2)                         | <10 <sup>6</sup>                    | 89 (40.5)                                                                                              |                                   |
|                        | 70 - <80                                                                                                                                                                                                                                      | 238              | 93 (39.1)                       | 35 (37.6)                         | <10 <sup>6</sup>                    | 40 (43.0)                                                                                              |                                   |
|                        | 80 - <90                                                                                                                                                                                                                                      | 53               | <10 <sup>6</sup>                | <10 <sup>6</sup>                  | <10 <sup>6</sup>                    | <10 <sup>6</sup>                                                                                       |                                   |
|                        | 90 - <100                                                                                                                                                                                                                                     | <10 <sup>6</sup> | <10 <sup>6</sup>                | <10 <sup>6</sup>                  | <10 <sup>6</sup>                    | <10 <sup>6</sup>                                                                                       |                                   |
|                        | 100 - <110                                                                                                                                                                                                                                    | <10 <sup>6</sup> | <10 <sup>6</sup>                | <10 <sup>6</sup>                  | <10 <sup>6</sup>                    | <10 <sup>6</sup>                                                                                       |                                   |

<sup>1</sup>Eligible for indicator; <sup>2</sup>Achieve in current prison; <sup>3</sup>Achieve in previous prison; <sup>4</sup>Overall achievement - either current or previous prison; <sup>5</sup>Declined indicator; <sup>6</sup>Suppressed (<10) to avoid disclosure

| Indicator                      | The proportion of people aged 79 years or under, with coronary heart disease, hypertension, stroke, transient ischaemic attack or peripheral arterial disease, who have had a blood pressure of 140/90mmHg or less in the preceding 12 months |            |                                 |                                   |                                     | Community achievement 2019/20: CHD: 77.77%, Hypertension: 67.28%, Stroke/TIA: 73.92%, PAD not recorded |
|--------------------------------|-----------------------------------------------------------------------------------------------------------------------------------------------------------------------------------------------------------------------------------------------|------------|---------------------------------|-----------------------------------|-------------------------------------|--------------------------------------------------------------------------------------------------------|
|                                | Group: Cardiovascular Disease                                                                                                                                                                                                                 | Population | Eligible <sup>1</sup> (% popln) | Satisfy <sup>2</sup> (% eligible) | Elsewhere <sup>3</sup> (% eligible) |                                                                                                        |
| Variable                       |                                                                                                                                                                                                                                               |            |                                 |                                   |                                     |                                                                                                        |
| <b>Length of Stay (months)</b> |                                                                                                                                                                                                                                               |            |                                 |                                   |                                     |                                                                                                        |
| 2017/18                        | <1                                                                                                                                                                                                                                            | 4,474      | 114 (2.5)                       | 46 (40.4)                         | <10 <sup>6</sup>                    | 46 (40.4)                                                                                              |
|                                | 1-<6                                                                                                                                                                                                                                          | 8,075      | 282 (3.5)                       | 127 (45.0)                        | <10 <sup>6</sup>                    | 134 (47.5)                                                                                             |
|                                | 6-<12                                                                                                                                                                                                                                         | 3,672      | 159 (4.3)                       | 79 (49.7)                         | <10 <sup>6</sup>                    | 80 (50.3)                                                                                              |
|                                | 12-<24                                                                                                                                                                                                                                        | 2,832      | 135 (4.8)                       | 59 (43.7)                         | <10 <sup>6</sup>                    | 59 (43.7)                                                                                              |
|                                | 24+                                                                                                                                                                                                                                           | 2,624      | 299 (11.4)                      | 146 (48.8)                        | <10 <sup>6</sup>                    | 146 (48.8)                                                                                             |
| 2018/19                        | <1                                                                                                                                                                                                                                            | 4,801      | 163 (3.4)                       | 64 (39.3)                         | <10 <sup>6</sup>                    | 64 (39.3)                                                                                              |
|                                | 1-<6                                                                                                                                                                                                                                          | 7,742      | 313 (4.0)                       | 148 (47.3)                        | <10 <sup>6</sup>                    | 154 (49.2)                                                                                             |
|                                | 6-<12                                                                                                                                                                                                                                         | 3,616      | 144 (4.0)                       | 61 (42.4)                         | <10 <sup>6</sup>                    | 61 (42.4)                                                                                              |
|                                | 12-<24                                                                                                                                                                                                                                        | 3,447      | 191 (5.5)                       | 94 (49.2)                         | <10 <sup>6</sup>                    | 103 (53.9)                                                                                             |
|                                | 24+                                                                                                                                                                                                                                           | 2,493      | 292 (11.7)                      | 124 (42.5)                        | <10 <sup>6</sup>                    | 128 (43.8)                                                                                             |
| 2019/20                        | <1                                                                                                                                                                                                                                            | 5,745      | 160 (2.8)                       | 65 (40.6)                         | <10 <sup>6</sup>                    | 67 (41.9)                                                                                              |
|                                | 1-<6                                                                                                                                                                                                                                          | 9,697      | 383 (3.9)                       | 153 (39.9)                        | 15 (3.9)                            | 168 (43.9)                                                                                             |
|                                | 6-<12                                                                                                                                                                                                                                         | 5,090      | 259 (5.1)                       | 96 (37.1)                         | 19 (7.3)                            | 115 (44.4)                                                                                             |
|                                | 12-<24                                                                                                                                                                                                                                        | 3,244      | 223 (6.9)                       | 94 (42.2)                         | <10 <sup>6</sup>                    | 97 (43.5)                                                                                              |
|                                | 24+                                                                                                                                                                                                                                           | 2,035      | 286 (14.1)                      | 135 (47.2)                        | <10 <sup>6</sup>                    | 139 (48.6)                                                                                             |
| <b>Ethnic Group</b>            |                                                                                                                                                                                                                                               |            |                                 |                                   |                                     |                                                                                                        |
| 2017/18                        | White                                                                                                                                                                                                                                         | 15,638     | 839 (5.4)                       | 398 (47.4)                        | <10 <sup>6</sup>                    | 404 (48.2)                                                                                             |
|                                | Mixed                                                                                                                                                                                                                                         | 431        | <10 <sup>6</sup>                | <10 <sup>6</sup>                  | <10 <sup>6</sup>                    | <10 <sup>6</sup>                                                                                       |
|                                | Asian or Asian British                                                                                                                                                                                                                        | 813        | 23 (2.8)                        | 13 (56.5)                         | <10 <sup>6</sup>                    | 14 (60.9)                                                                                              |
|                                | Black or Black British                                                                                                                                                                                                                        | 404        | 12 (3.0)                        | <10 <sup>6</sup>                  | <10 <sup>6</sup>                    | <10 <sup>6</sup>                                                                                       |
|                                | Chinese and Other                                                                                                                                                                                                                             | 214        | 13 (6.1)                        | <10 <sup>6</sup>                  | <10 <sup>6</sup>                    | <10 <sup>6</sup>                                                                                       |
|                                | Unclassified                                                                                                                                                                                                                                  | 372        | 17 (4.6)                        | <10 <sup>6</sup>                  | <10 <sup>6</sup>                    | <10 <sup>6</sup>                                                                                       |
| 2018/19                        | White                                                                                                                                                                                                                                         | 14,911     | 864 (5.8)                       | 375 (43.4)                        | 15 (1.7)                            | 390 (45.1)                                                                                             |
|                                | Mixed                                                                                                                                                                                                                                         | 371        | 13 (3.5)                        | <10 <sup>6</sup>                  | <10 <sup>6</sup>                    | <10 <sup>6</sup>                                                                                       |
|                                | Asian or Asian British                                                                                                                                                                                                                        | 726        | 25 (3.4)                        | 16 (64.0)                         | <10 <sup>6</sup>                    | 16 (64.0)                                                                                              |
|                                | Black or Black British                                                                                                                                                                                                                        | 364        | 17 (4.7)                        | <10 <sup>6</sup>                  | <10 <sup>6</sup>                    | <10 <sup>6</sup>                                                                                       |
|                                | Chinese and Other                                                                                                                                                                                                                             | 167        | <10 <sup>6</sup>                | <10 <sup>6</sup>                  | <10 <sup>6</sup>                    | <10 <sup>6</sup>                                                                                       |
|                                | Unclassified                                                                                                                                                                                                                                  | 409        | 17 (4.2)                        | <10 <sup>6</sup>                  | <10 <sup>6</sup>                    | <10 <sup>6</sup>                                                                                       |
| 2019/20                        | White                                                                                                                                                                                                                                         | 16,606     | 956 (5.8)                       | 416 (43.5)                        | 30 (3.1)                            | 446 (46.7)                                                                                             |
|                                | Mixed                                                                                                                                                                                                                                         | 409        | 12 (2.9)                        | <10 <sup>6</sup>                  | <10 <sup>6</sup>                    | <10 <sup>6</sup>                                                                                       |
|                                | Asian or Asian British                                                                                                                                                                                                                        | 755        | 33 (4.4)                        | 20 (60.6)                         | <10 <sup>6</sup>                    | 22 (66.7)                                                                                              |
|                                | Black or Black British                                                                                                                                                                                                                        | 451        | 21 (4.7)                        | <10 <sup>6</sup>                  | <10 <sup>6</sup>                    | <10 <sup>6</sup>                                                                                       |
|                                | Chinese and Other                                                                                                                                                                                                                             | 163        | <10 <sup>6</sup>                | <10 <sup>6</sup>                  | <10 <sup>6</sup>                    | <10 <sup>6</sup>                                                                                       |
|                                | Unclassified                                                                                                                                                                                                                                  | 387        | 21 (5.4)                        | <10 <sup>6</sup>                  | <10 <sup>6</sup>                    | <10 <sup>6</sup>                                                                                       |

<sup>1</sup>Eligible for indicator; <sup>2</sup>Achieve in current prison; <sup>3</sup>Achieve in previous prison; <sup>4</sup>Overall achievement - either current or previous prison; <sup>5</sup>Declined indicator; <sup>6</sup>Suppressed (<10) to avoid disclosure

| Indicator                            | The proportion of people aged 80 years or over, with coronary heart disease, hypertension, stroke, transient ischaemic attack or peripheral arterial disease, who have had a blood pressure of 150/90mmHg or less in the preceding 12 months |            |                                 |                                   |                                     |                                   |
|--------------------------------------|----------------------------------------------------------------------------------------------------------------------------------------------------------------------------------------------------------------------------------------------|------------|---------------------------------|-----------------------------------|-------------------------------------|-----------------------------------|
|                                      | Variable                                                                                                                                                                                                                                     | Population | Eligible <sup>1</sup> (% popln) | Satisfy <sup>2</sup> (% eligible) | Elsewhere <sup>3</sup> (% eligible) | Achieve <sup>4</sup> (% eligible) |
| <b>Group: Cardiovascular Disease</b> |                                                                                                                                                                                                                                              |            |                                 |                                   |                                     |                                   |
| <b>Year</b>                          |                                                                                                                                                                                                                                              |            |                                 |                                   |                                     |                                   |
|                                      | 2017/18                                                                                                                                                                                                                                      | 21,677     | <10 <sup>6</sup>                | <10 <sup>6</sup>                  | <10 <sup>6</sup>                    | <10 <sup>6</sup>                  |
|                                      | 2018/19                                                                                                                                                                                                                                      | 22,099     | 12 (0.1)                        | <10 <sup>6</sup>                  | <10 <sup>6</sup>                    | <10 <sup>6</sup>                  |
|                                      | 2019/20                                                                                                                                                                                                                                      | 25,811     | 19 (0.1)                        | <10 <sup>6</sup>                  | <10 <sup>6</sup>                    | 10 (52.6)                         |
| <b>Prison</b>                        |                                                                                                                                                                                                                                              |            |                                 |                                   |                                     |                                   |
| 2017/18                              | Prison 1                                                                                                                                                                                                                                     | 1,323      | <10 <sup>6</sup>                | <10 <sup>6</sup>                  | <10 <sup>6</sup>                    | <10 <sup>6</sup>                  |
|                                      | Prison 2                                                                                                                                                                                                                                     | 3,261      | <10 <sup>6</sup>                | <10 <sup>6</sup>                  | <10 <sup>6</sup>                    | <10 <sup>6</sup>                  |
|                                      | Prison 3                                                                                                                                                                                                                                     | 2,623      | <10 <sup>6</sup>                | <10 <sup>6</sup>                  | <10 <sup>6</sup>                    | <10 <sup>6</sup>                  |
|                                      | Prison 4                                                                                                                                                                                                                                     | 2,089      | <10 <sup>6</sup>                | <10 <sup>6</sup>                  | <10 <sup>6</sup>                    | <10 <sup>6</sup>                  |
|                                      | Prison 5                                                                                                                                                                                                                                     | 637        | <10 <sup>6</sup>                | <10 <sup>6</sup>                  | <10 <sup>6</sup>                    | <10 <sup>6</sup>                  |
|                                      | Prison 6                                                                                                                                                                                                                                     | 1,552      | <10 <sup>6</sup>                | <10 <sup>6</sup>                  | <10 <sup>6</sup>                    | <10 <sup>6</sup>                  |
|                                      | Prison 7                                                                                                                                                                                                                                     | 635        | <10 <sup>6</sup>                | <10 <sup>6</sup>                  | <10 <sup>6</sup>                    | <10 <sup>6</sup>                  |
|                                      | Prison 8                                                                                                                                                                                                                                     | 1,085      | <10 <sup>6</sup>                | <10 <sup>6</sup>                  | <10 <sup>6</sup>                    | <10 <sup>6</sup>                  |
|                                      | Prison 9                                                                                                                                                                                                                                     | 981        | <10 <sup>6</sup>                | <10 <sup>6</sup>                  | <10 <sup>6</sup>                    | <10 <sup>6</sup>                  |
|                                      | Prison 10                                                                                                                                                                                                                                    | 2,523      | <10 <sup>6</sup>                | <10 <sup>6</sup>                  | <10 <sup>6</sup>                    | <10 <sup>6</sup>                  |
|                                      | Prison 11                                                                                                                                                                                                                                    | 3,470      | <10 <sup>6</sup>                | <10 <sup>6</sup>                  | <10 <sup>6</sup>                    | <10 <sup>6</sup>                  |
|                                      | Prison 12                                                                                                                                                                                                                                    | 815        | <10 <sup>6</sup>                | <10 <sup>6</sup>                  | <10 <sup>6</sup>                    | <10 <sup>6</sup>                  |
|                                      | Prison 13                                                                                                                                                                                                                                    | 683        | <10 <sup>6</sup>                | <10 <sup>6</sup>                  | <10 <sup>6</sup>                    | <10 <sup>6</sup>                  |
| 2018/19                              | Prison 1                                                                                                                                                                                                                                     | 1,333      | <10 <sup>6</sup>                | <10 <sup>6</sup>                  | <10 <sup>6</sup>                    | <10 <sup>6</sup>                  |
|                                      | Prison 2                                                                                                                                                                                                                                     | 2,705      | <10 <sup>6</sup>                | <10 <sup>6</sup>                  | <10 <sup>6</sup>                    | <10 <sup>6</sup>                  |
|                                      | Prison 3                                                                                                                                                                                                                                     | 2,522      | <10 <sup>6</sup>                | <10 <sup>6</sup>                  | <10 <sup>6</sup>                    | <10 <sup>6</sup>                  |
|                                      | Prison 4                                                                                                                                                                                                                                     | 2,349      | <10 <sup>6</sup>                | <10 <sup>6</sup>                  | <10 <sup>6</sup>                    | <10 <sup>6</sup>                  |
|                                      | Prison 5                                                                                                                                                                                                                                     | 676        | <10 <sup>6</sup>                | <10 <sup>6</sup>                  | <10 <sup>6</sup>                    | <10 <sup>6</sup>                  |
|                                      | Prison 6                                                                                                                                                                                                                                     | 1,513      | <10 <sup>6</sup>                | <10 <sup>6</sup>                  | <10 <sup>6</sup>                    | <10 <sup>6</sup>                  |
|                                      | Prison 7                                                                                                                                                                                                                                     | 654        | <10 <sup>6</sup>                | <10 <sup>6</sup>                  | <10 <sup>6</sup>                    | <10 <sup>6</sup>                  |
|                                      | Prison 8                                                                                                                                                                                                                                     | 1,148      | <10 <sup>6</sup>                | <10 <sup>6</sup>                  | <10 <sup>6</sup>                    | <10 <sup>6</sup>                  |
|                                      | Prison 9                                                                                                                                                                                                                                     | 996        | <10 <sup>6</sup>                | <10 <sup>6</sup>                  | <10 <sup>6</sup>                    | <10 <sup>6</sup>                  |
|                                      | Prison 10                                                                                                                                                                                                                                    | 2,717      | <10 <sup>6</sup>                | <10 <sup>6</sup>                  | <10 <sup>6</sup>                    | <10 <sup>6</sup>                  |
|                                      | Prison 11                                                                                                                                                                                                                                    | 4,020      | <10 <sup>6</sup>                | <10 <sup>6</sup>                  | <10 <sup>6</sup>                    | <10 <sup>6</sup>                  |
|                                      | Prison 12                                                                                                                                                                                                                                    | 792        | <10 <sup>6</sup>                | <10 <sup>6</sup>                  | <10 <sup>6</sup>                    | <10 <sup>6</sup>                  |
|                                      | Prison 13                                                                                                                                                                                                                                    | 674        | <10 <sup>6</sup>                | <10 <sup>6</sup>                  | <10 <sup>6</sup>                    | <10 <sup>6</sup>                  |
| 2019/20                              | Prison 1                                                                                                                                                                                                                                     | 1,410      | <10 <sup>6</sup>                | <10 <sup>6</sup>                  | <10 <sup>6</sup>                    | <10 <sup>6</sup>                  |
|                                      | Prison 2                                                                                                                                                                                                                                     | 2,979      | <10 <sup>6</sup>                | <10 <sup>6</sup>                  | <10 <sup>6</sup>                    | <10 <sup>6</sup>                  |
|                                      | Prison 3                                                                                                                                                                                                                                     | 2,809      | <10 <sup>6</sup>                | <10 <sup>6</sup>                  | <10 <sup>6</sup>                    | <10 <sup>6</sup>                  |
|                                      | Prison 4                                                                                                                                                                                                                                     | 2,651      | <10 <sup>6</sup>                | <10 <sup>6</sup>                  | <10 <sup>6</sup>                    | <10 <sup>6</sup>                  |
|                                      | Prison 5                                                                                                                                                                                                                                     | 616        | <10 <sup>6</sup>                | <10 <sup>6</sup>                  | <10 <sup>6</sup>                    | <10 <sup>6</sup>                  |
|                                      | Prison 6                                                                                                                                                                                                                                     | 1,533      | <10 <sup>6</sup>                | <10 <sup>6</sup>                  | <10 <sup>6</sup>                    | <10 <sup>6</sup>                  |
|                                      | Prison 7                                                                                                                                                                                                                                     | 860        | <10 <sup>6</sup>                | <10 <sup>6</sup>                  | <10 <sup>6</sup>                    | <10 <sup>6</sup>                  |
|                                      | Prison 8                                                                                                                                                                                                                                     | 1,385      | <10 <sup>6</sup>                | <10 <sup>6</sup>                  | <10 <sup>6</sup>                    | <10 <sup>6</sup>                  |
|                                      | Prison 9                                                                                                                                                                                                                                     | 1,092      | <10 <sup>6</sup>                | <10 <sup>6</sup>                  | <10 <sup>6</sup>                    | <10 <sup>6</sup>                  |
|                                      | Prison 10                                                                                                                                                                                                                                    | 3,577      | <10 <sup>6</sup>                | <10 <sup>6</sup>                  | <10 <sup>6</sup>                    | <10 <sup>6</sup>                  |
|                                      | Prison 11                                                                                                                                                                                                                                    | 5,348      | <10 <sup>6</sup>                | <10 <sup>6</sup>                  | <10 <sup>6</sup>                    | <10 <sup>6</sup>                  |
|                                      | Prison 12                                                                                                                                                                                                                                    | 805        | <10 <sup>6</sup>                | <10 <sup>6</sup>                  | <10 <sup>6</sup>                    | <10 <sup>6</sup>                  |
|                                      | Prison 13                                                                                                                                                                                                                                    | 746        | <10 <sup>6</sup>                | <10 <sup>6</sup>                  | <10 <sup>6</sup>                    | <10 <sup>6</sup>                  |
| <b>Prison category</b>               |                                                                                                                                                                                                                                              |            |                                 |                                   |                                     |                                   |
| 2017/18                              | A                                                                                                                                                                                                                                            | 1,664      | <10 <sup>6</sup>                | <10 <sup>6</sup>                  | <10 <sup>6</sup>                    | <10 <sup>6</sup>                  |
|                                      | B                                                                                                                                                                                                                                            | 9,254      | <10 <sup>6</sup>                | <10 <sup>6</sup>                  | <10 <sup>6</sup>                    | <10 <sup>6</sup>                  |
|                                      | C                                                                                                                                                                                                                                            | 6,035      | <10 <sup>6</sup>                | <10 <sup>6</sup>                  | <10 <sup>6</sup>                    | <10 <sup>6</sup>                  |
|                                      | Closed                                                                                                                                                                                                                                       | 1,720      | <10 <sup>6</sup>                | <10 <sup>6</sup>                  | <10 <sup>6</sup>                    | <10 <sup>6</sup>                  |
|                                      | D                                                                                                                                                                                                                                            | 2,189      | <10 <sup>6</sup>                | <10 <sup>6</sup>                  | <10 <sup>6</sup>                    | <10 <sup>6</sup>                  |
|                                      | YOI                                                                                                                                                                                                                                          | 815        | <10 <sup>6</sup>                | <10 <sup>6</sup>                  | <10 <sup>6</sup>                    | <10 <sup>6</sup>                  |
| 2018/19                              | A                                                                                                                                                                                                                                            | 1,670      | <10 <sup>6</sup>                | <10 <sup>6</sup>                  | <10 <sup>6</sup>                    | <10 <sup>6</sup>                  |
|                                      | B                                                                                                                                                                                                                                            | 9,442      | <10 <sup>6</sup>                | <10 <sup>6</sup>                  | <10 <sup>6</sup>                    | <10 <sup>6</sup>                  |
|                                      | C                                                                                                                                                                                                                                            | 6,204      | <10 <sup>6</sup>                | <10 <sup>6</sup>                  | <10 <sup>6</sup>                    | <10 <sup>6</sup>                  |
|                                      | Closed                                                                                                                                                                                                                                       | 1,802      | <10 <sup>6</sup>                | <10 <sup>6</sup>                  | <10 <sup>6</sup>                    | <10 <sup>6</sup>                  |
|                                      | D                                                                                                                                                                                                                                            | 2,189      | <10 <sup>6</sup>                | <10 <sup>6</sup>                  | <10 <sup>6</sup>                    | <10 <sup>6</sup>                  |
|                                      | YOI                                                                                                                                                                                                                                          | 792        | <10 <sup>6</sup>                | <10 <sup>6</sup>                  | <10 <sup>6</sup>                    | <10 <sup>6</sup>                  |
| 2019/20                              | A                                                                                                                                                                                                                                            | 1,838      | <10 <sup>6</sup>                | <10 <sup>6</sup>                  | <10 <sup>6</sup>                    | <10 <sup>6</sup>                  |
|                                      | B                                                                                                                                                                                                                                            | 11,904     | <10 <sup>6</sup>                | <10 <sup>6</sup>                  | <10 <sup>6</sup>                    | <10 <sup>6</sup>                  |
|                                      | C                                                                                                                                                                                                                                            | 6,870      | <10 <sup>6</sup>                | <10 <sup>6</sup>                  | <10 <sup>6</sup>                    | <10 <sup>6</sup>                  |
|                                      | Closed                                                                                                                                                                                                                                       | 2,245      | <10 <sup>6</sup>                | <10 <sup>6</sup>                  | <10 <sup>6</sup>                    | <10 <sup>6</sup>                  |
|                                      | D                                                                                                                                                                                                                                            | 2,149      | <10 <sup>6</sup>                | <10 <sup>6</sup>                  | <10 <sup>6</sup>                    | <10 <sup>6</sup>                  |
|                                      | YOI                                                                                                                                                                                                                                          | 805        | <10 <sup>6</sup>                | <10 <sup>6</sup>                  | <10 <sup>6</sup>                    | <10 <sup>6</sup>                  |
| <b>Gender</b>                        |                                                                                                                                                                                                                                              |            |                                 |                                   |                                     |                                   |
| 2017/18                              | F                                                                                                                                                                                                                                            | 1,699      | <10 <sup>6</sup>                | <10 <sup>6</sup>                  | <10 <sup>6</sup>                    | <10 <sup>6</sup>                  |
|                                      | M                                                                                                                                                                                                                                            | 19,977     | <10 <sup>6</sup>                | <10 <sup>6</sup>                  | <10 <sup>6</sup>                    | <10 <sup>6</sup>                  |
| 2018/19                              | F                                                                                                                                                                                                                                            | 1,802      | <10 <sup>6</sup>                | <10 <sup>6</sup>                  | <10 <sup>6</sup>                    | <10 <sup>6</sup>                  |
|                                      | M                                                                                                                                                                                                                                            | 20,295     | 12 (0.1)                        | <10 <sup>6</sup>                  | <10 <sup>6</sup>                    | <10 <sup>6</sup>                  |
| 2019/20                              | F                                                                                                                                                                                                                                            | 1,376      | <10 <sup>6</sup>                | <10 <sup>6</sup>                  | <10 <sup>6</sup>                    | <10 <sup>6</sup>                  |
|                                      | M                                                                                                                                                                                                                                            | 23,570     | 19 (0.1)                        | <10 <sup>6</sup>                  | <10 <sup>6</sup>                    | 10 (52.6)                         |

Community achievement 2019/20: CHD: 86.5%, Hypertension: 81.97%, Stroke/TIA: 84.9%, PAD not recorded

<sup>1</sup>Eligible for indicator; <sup>2</sup>Achieve in current prison; <sup>3</sup>Achieve in previous prison; <sup>4</sup>Overall achievement - either current or previous prison; <sup>5</sup>Declined indicator; <sup>6</sup>Suppressed (<10) to avoid disclosure

| Indicator              | The proportion of people aged 80 years or over, with coronary heart disease, hypertension, stroke, transient ischaemic attack or peripheral arterial disease, who have had a blood pressure of 150/90mmHg or less in the preceding 12 months |                  |                                 |                                   |                                     | Community achievement 2019/20: CHD: 86.5%, Hypertension: 81.97%, Stroke/TIA: 84.9%, PAD not recorded |
|------------------------|----------------------------------------------------------------------------------------------------------------------------------------------------------------------------------------------------------------------------------------------|------------------|---------------------------------|-----------------------------------|-------------------------------------|------------------------------------------------------------------------------------------------------|
|                        | Group: Cardiovascular Disease                                                                                                                                                                                                                | Population       | Eligible <sup>1</sup> (% popln) | Satisfy <sup>2</sup> (% eligible) | Elsewhere <sup>3</sup> (% eligible) |                                                                                                      |
| <b>Sentence Status</b> |                                                                                                                                                                                                                                              |                  |                                 |                                   |                                     |                                                                                                      |
| 2017/18                | .                                                                                                                                                                                                                                            | 81               | <10 <sup>6</sup>                | <10 <sup>6</sup>                  | <10 <sup>6</sup>                    | <10 <sup>6</sup>                                                                                     |
|                        | Absconded                                                                                                                                                                                                                                    | <10 <sup>0</sup> | <10 <sup>6</sup>                | <10 <sup>6</sup>                  | <10 <sup>6</sup>                    | <10 <sup>6</sup>                                                                                     |
|                        | Active In                                                                                                                                                                                                                                    | 15,872           | <10 <sup>6</sup>                | <10 <sup>6</sup>                  | <10 <sup>6</sup>                    | <10 <sup>6</sup>                                                                                     |
|                        | Active Out                                                                                                                                                                                                                                   | 1,052            | <10 <sup>6</sup>                | <10 <sup>6</sup>                  | <10 <sup>6</sup>                    | <10 <sup>6</sup>                                                                                     |
|                        | Convicted Sentence                                                                                                                                                                                                                           | 2,125            | <10 <sup>6</sup>                | <10 <sup>6</sup>                  | <10 <sup>6</sup>                    | <10 <sup>6</sup>                                                                                     |
|                        | Downgrade in security category                                                                                                                                                                                                               | <10 <sup>0</sup> | <10 <sup>6</sup>                | <10 <sup>6</sup>                  | <10 <sup>6</sup>                    | <10 <sup>6</sup>                                                                                     |
|                        | Internal Cell Move                                                                                                                                                                                                                           | <10 <sup>0</sup> | <10 <sup>6</sup>                | <10 <sup>6</sup>                  | <10 <sup>6</sup>                    | <10 <sup>6</sup>                                                                                     |
|                        | Judges Remand                                                                                                                                                                                                                                | 92               | <10 <sup>6</sup>                | <10 <sup>6</sup>                  | <10 <sup>6</sup>                    | <10 <sup>6</sup>                                                                                     |
|                        | Licence Revoke                                                                                                                                                                                                                               | 52               | <10 <sup>6</sup>                | <10 <sup>6</sup>                  | <10 <sup>6</sup>                    | <10 <sup>6</sup>                                                                                     |
|                        | On Remand                                                                                                                                                                                                                                    | 1,492            | <10 <sup>6</sup>                | <10 <sup>6</sup>                  | <10 <sup>6</sup>                    | <10 <sup>6</sup>                                                                                     |
|                        | Transfer                                                                                                                                                                                                                                     | 910              | <10 <sup>6</sup>                | <10 <sup>6</sup>                  | <10 <sup>6</sup>                    | <10 <sup>6</sup>                                                                                     |
|                        | Upgrade in security category                                                                                                                                                                                                                 | <10 <sup>0</sup> | <10 <sup>6</sup>                | <10 <sup>6</sup>                  | <10 <sup>6</sup>                    | <10 <sup>6</sup>                                                                                     |
| 2018/19                | .                                                                                                                                                                                                                                            | 88               | <10 <sup>6</sup>                | <10 <sup>6</sup>                  | <10 <sup>6</sup>                    | <10 <sup>6</sup>                                                                                     |
|                        | Absconded                                                                                                                                                                                                                                    | <10 <sup>0</sup> | <10 <sup>6</sup>                | <10 <sup>6</sup>                  | <10 <sup>6</sup>                    | <10 <sup>6</sup>                                                                                     |
|                        | Active In                                                                                                                                                                                                                                    | 18,145           | <10 <sup>6</sup>                | <10 <sup>6</sup>                  | <10 <sup>6</sup>                    | <10 <sup>6</sup>                                                                                     |
|                        | Active Out                                                                                                                                                                                                                                   | 835              | <10 <sup>6</sup>                | <10 <sup>6</sup>                  | <10 <sup>6</sup>                    | <10 <sup>6</sup>                                                                                     |
|                        | Convicted Sentence                                                                                                                                                                                                                           | 1,320            | <10 <sup>6</sup>                | <10 <sup>6</sup>                  | <10 <sup>6</sup>                    | <10 <sup>6</sup>                                                                                     |
|                        | Downgrade in security category                                                                                                                                                                                                               | <10 <sup>0</sup> | <10 <sup>6</sup>                | <10 <sup>6</sup>                  | <10 <sup>6</sup>                    | <10 <sup>6</sup>                                                                                     |
|                        | Internal Cell Move                                                                                                                                                                                                                           | <10 <sup>0</sup> | <10 <sup>6</sup>                | <10 <sup>6</sup>                  | <10 <sup>6</sup>                    | <10 <sup>6</sup>                                                                                     |
|                        | Judges Remand                                                                                                                                                                                                                                | <10 <sup>0</sup> | <10 <sup>6</sup>                | <10 <sup>6</sup>                  | <10 <sup>6</sup>                    | <10 <sup>6</sup>                                                                                     |
|                        | Licence Revoke                                                                                                                                                                                                                               | 125              | <10 <sup>6</sup>                | <10 <sup>6</sup>                  | <10 <sup>6</sup>                    | <10 <sup>6</sup>                                                                                     |
|                        | On Remand                                                                                                                                                                                                                                    | 1,059            | <10 <sup>6</sup>                | <10 <sup>6</sup>                  | <10 <sup>6</sup>                    | <10 <sup>6</sup>                                                                                     |
|                        | Transfer                                                                                                                                                                                                                                     | 518              | <10 <sup>6</sup>                | <10 <sup>6</sup>                  | <10 <sup>6</sup>                    | <10 <sup>6</sup>                                                                                     |
|                        | Upgrade in security category                                                                                                                                                                                                                 | <10 <sup>0</sup> | <10 <sup>6</sup>                | <10 <sup>6</sup>                  | <10 <sup>6</sup>                    | <10 <sup>6</sup>                                                                                     |
| 2019/20                | .                                                                                                                                                                                                                                            | 69               | <10 <sup>6</sup>                | <10 <sup>6</sup>                  | <10 <sup>6</sup>                    | <10 <sup>6</sup>                                                                                     |
|                        | Absconded                                                                                                                                                                                                                                    | <10 <sup>0</sup> | <10 <sup>6</sup>                | <10 <sup>6</sup>                  | <10 <sup>6</sup>                    | <10 <sup>6</sup>                                                                                     |
|                        | Active In                                                                                                                                                                                                                                    | 22,424           | 15 (0.1)                        | <10 <sup>6</sup>                  | <10 <sup>6</sup>                    | <10 <sup>6</sup>                                                                                     |
|                        | Active Out                                                                                                                                                                                                                                   | 625              | <10 <sup>6</sup>                | <10 <sup>6</sup>                  | <10 <sup>6</sup>                    | <10 <sup>6</sup>                                                                                     |
|                        | Convicted Sentence                                                                                                                                                                                                                           | 1,361            | <10 <sup>6</sup>                | <10 <sup>6</sup>                  | <10 <sup>6</sup>                    | <10 <sup>6</sup>                                                                                     |
|                        | Downgrade in security category                                                                                                                                                                                                               | <10 <sup>0</sup> | <10 <sup>6</sup>                | <10 <sup>6</sup>                  | <10 <sup>6</sup>                    | <10 <sup>6</sup>                                                                                     |
|                        | Internal Cell Move                                                                                                                                                                                                                           | <10 <sup>0</sup> | <10 <sup>6</sup>                | <10 <sup>6</sup>                  | <10 <sup>6</sup>                    | <10 <sup>6</sup>                                                                                     |
|                        | Judges Remand                                                                                                                                                                                                                                | 19               | <10 <sup>6</sup>                | <10 <sup>6</sup>                  | <10 <sup>6</sup>                    | <10 <sup>6</sup>                                                                                     |
|                        | Licence Revoke                                                                                                                                                                                                                               | 178              | <10 <sup>6</sup>                | <10 <sup>6</sup>                  | <10 <sup>6</sup>                    | <10 <sup>6</sup>                                                                                     |
|                        | On Remand                                                                                                                                                                                                                                    | 1,031            | <10 <sup>6</sup>                | <10 <sup>6</sup>                  | <10 <sup>6</sup>                    | <10 <sup>6</sup>                                                                                     |
|                        | Transfer                                                                                                                                                                                                                                     | 101              | <10 <sup>6</sup>                | <10 <sup>6</sup>                  | <10 <sup>6</sup>                    | <10 <sup>6</sup>                                                                                     |
|                        | Upgrade in security category                                                                                                                                                                                                                 | <10 <sup>0</sup> | <10 <sup>6</sup>                | <10 <sup>6</sup>                  | <10 <sup>6</sup>                    | <10 <sup>6</sup>                                                                                     |
| <b>Age - years</b>     |                                                                                                                                                                                                                                              |                  |                                 |                                   |                                     |                                                                                                      |
| 2017/18                | 10 - <20                                                                                                                                                                                                                                     | 468              | <10 <sup>6</sup>                | <10 <sup>6</sup>                  | <10 <sup>6</sup>                    | <10 <sup>6</sup>                                                                                     |
|                        | 20 - <30                                                                                                                                                                                                                                     | 6,994            | <10 <sup>6</sup>                | <10 <sup>6</sup>                  | <10 <sup>6</sup>                    | <10 <sup>6</sup>                                                                                     |
|                        | 30 - <40                                                                                                                                                                                                                                     | 7,051            | <10 <sup>6</sup>                | <10 <sup>6</sup>                  | <10 <sup>6</sup>                    | <10 <sup>6</sup>                                                                                     |
|                        | 40 - <50                                                                                                                                                                                                                                     | 4,114            | <10 <sup>6</sup>                | <10 <sup>6</sup>                  | <10 <sup>6</sup>                    | <10 <sup>6</sup>                                                                                     |
|                        | 50 - <60                                                                                                                                                                                                                                     | 2,107            | <10 <sup>6</sup>                | <10 <sup>6</sup>                  | <10 <sup>6</sup>                    | <10 <sup>6</sup>                                                                                     |
|                        | 60 - <70                                                                                                                                                                                                                                     | 684              | <10 <sup>6</sup>                | <10 <sup>6</sup>                  | <10 <sup>6</sup>                    | <10 <sup>6</sup>                                                                                     |
|                        | 70 - <80                                                                                                                                                                                                                                     | 213              | <10 <sup>6</sup>                | <10 <sup>6</sup>                  | <10 <sup>6</sup>                    | <10 <sup>6</sup>                                                                                     |
|                        | 80 - <90                                                                                                                                                                                                                                     | 40               | <10 <sup>6</sup>                | <10 <sup>6</sup>                  | <10 <sup>6</sup>                    | <10 <sup>6</sup>                                                                                     |
|                        | 90 - <100                                                                                                                                                                                                                                    | <10 <sup>0</sup> | <10 <sup>6</sup>                | <10 <sup>6</sup>                  | <10 <sup>6</sup>                    | <10 <sup>6</sup>                                                                                     |
|                        | 100 - <110                                                                                                                                                                                                                                   | <10 <sup>0</sup> | <10 <sup>6</sup>                | <10 <sup>6</sup>                  | <10 <sup>6</sup>                    | <10 <sup>6</sup>                                                                                     |
| 2018/19                | 10 - <20                                                                                                                                                                                                                                     | 436              | <10 <sup>6</sup>                | <10 <sup>6</sup>                  | <10 <sup>6</sup>                    | <10 <sup>6</sup>                                                                                     |
|                        | 20 - <30                                                                                                                                                                                                                                     | 7,163            | <10 <sup>6</sup>                | <10 <sup>6</sup>                  | <10 <sup>6</sup>                    | <10 <sup>6</sup>                                                                                     |
|                        | 30 - <40                                                                                                                                                                                                                                     | 7,381            | <10 <sup>6</sup>                | <10 <sup>6</sup>                  | <10 <sup>6</sup>                    | <10 <sup>6</sup>                                                                                     |
|                        | 40 - <50                                                                                                                                                                                                                                     | 4,180            | <10 <sup>6</sup>                | <10 <sup>6</sup>                  | <10 <sup>6</sup>                    | <10 <sup>6</sup>                                                                                     |
|                        | 50 - <60                                                                                                                                                                                                                                     | 1,978            | <10 <sup>6</sup>                | <10 <sup>6</sup>                  | <10 <sup>6</sup>                    | <10 <sup>6</sup>                                                                                     |
|                        | 60 - <70                                                                                                                                                                                                                                     | 701              | <10 <sup>6</sup>                | <10 <sup>6</sup>                  | <10 <sup>6</sup>                    | <10 <sup>6</sup>                                                                                     |
|                        | 70 - <80                                                                                                                                                                                                                                     | 209              | <10 <sup>6</sup>                | <10 <sup>6</sup>                  | <10 <sup>6</sup>                    | <10 <sup>6</sup>                                                                                     |
|                        | 80 - <90                                                                                                                                                                                                                                     | 45               | 10 (22.2)                       | <10 <sup>6</sup>                  | <10 <sup>6</sup>                    | <10 <sup>6</sup>                                                                                     |
|                        | 90 - <100                                                                                                                                                                                                                                    | <10 <sup>0</sup> | <10 <sup>6</sup>                | <10 <sup>6</sup>                  | <10 <sup>6</sup>                    | <10 <sup>6</sup>                                                                                     |
|                        | 100 - <110                                                                                                                                                                                                                                   | <10 <sup>0</sup> | <10 <sup>6</sup>                | <10 <sup>6</sup>                  | <10 <sup>6</sup>                    | <10 <sup>6</sup>                                                                                     |
| 2019/20                | 10 - <20                                                                                                                                                                                                                                     | 404              | <10 <sup>6</sup>                | <10 <sup>6</sup>                  | <10 <sup>6</sup>                    | <10 <sup>6</sup>                                                                                     |
|                        | 20 - <30                                                                                                                                                                                                                                     | 8,064            | <10 <sup>6</sup>                | <10 <sup>6</sup>                  | <10 <sup>6</sup>                    | <10 <sup>6</sup>                                                                                     |
|                        | 30 - <40                                                                                                                                                                                                                                     | 9,125            | <10 <sup>6</sup>                | <10 <sup>6</sup>                  | <10 <sup>6</sup>                    | <10 <sup>6</sup>                                                                                     |
|                        | 40 - <50                                                                                                                                                                                                                                     | 4,948            | <10 <sup>6</sup>                | <10 <sup>6</sup>                  | <10 <sup>6</sup>                    | <10 <sup>6</sup>                                                                                     |
|                        | 50 - <60                                                                                                                                                                                                                                     | 2,224            | <10 <sup>6</sup>                | <10 <sup>6</sup>                  | <10 <sup>6</sup>                    | <10 <sup>6</sup>                                                                                     |
|                        | 60 - <70                                                                                                                                                                                                                                     | 751              | <10 <sup>6</sup>                | <10 <sup>6</sup>                  | <10 <sup>6</sup>                    | <10 <sup>6</sup>                                                                                     |
|                        | 70 - <80                                                                                                                                                                                                                                     | 238              | <10 <sup>6</sup>                | <10 <sup>6</sup>                  | <10 <sup>6</sup>                    | <10 <sup>6</sup>                                                                                     |
|                        | 80 - <90                                                                                                                                                                                                                                     | 53               | 18 (34.0)                       | <10 <sup>6</sup>                  | <10 <sup>6</sup>                    | <10 <sup>6</sup>                                                                                     |
|                        | 90 - <100                                                                                                                                                                                                                                    | <10 <sup>0</sup> | <10 <sup>6</sup>                | <10 <sup>6</sup>                  | <10 <sup>6</sup>                    | <10 <sup>6</sup>                                                                                     |
|                        | 100 - <110                                                                                                                                                                                                                                   | <10 <sup>0</sup> | <10 <sup>6</sup>                | <10 <sup>6</sup>                  | <10 <sup>6</sup>                    | <10 <sup>6</sup>                                                                                     |

<sup>1</sup>Eligible for indicator; <sup>2</sup>Achieve in current prison; <sup>3</sup>Achieve in previous prison; <sup>4</sup>Overall achievement - either current or previous prison; <sup>5</sup>Declined indicator; <sup>6</sup>Suppressed (<10) to avoid disclosure

| Indicator                      | The proportion of people aged 80 years or over, with coronary heart disease, hypertension, stroke, transient ischaemic attack or peripheral arterial disease, who have had a blood pressure of 150/90mmHg or less in the preceding 12 months |            |                                 |                                   |                                     | Community achievement 2019/20: CHD: 86.5%, Hypertension: 81.97%, Stroke/TIA: 84.9%, PAD not recorded |
|--------------------------------|----------------------------------------------------------------------------------------------------------------------------------------------------------------------------------------------------------------------------------------------|------------|---------------------------------|-----------------------------------|-------------------------------------|------------------------------------------------------------------------------------------------------|
|                                | Group: Cardiovascular Disease                                                                                                                                                                                                                | Population | Eligible <sup>1</sup> (% popln) | Satisfy <sup>2</sup> (% eligible) | Elsewhere <sup>3</sup> (% eligible) |                                                                                                      |
| <b>Length of Stay (months)</b> |                                                                                                                                                                                                                                              |            |                                 |                                   |                                     |                                                                                                      |
| 2017/18                        | <1                                                                                                                                                                                                                                           | 4,474      | <10 <sup>6</sup>                | <10 <sup>6</sup>                  | <10 <sup>6</sup>                    | <10 <sup>6</sup>                                                                                     |
|                                | 1-<6                                                                                                                                                                                                                                         | 8,075      | <10 <sup>6</sup>                | <10 <sup>6</sup>                  | <10 <sup>6</sup>                    | <10 <sup>6</sup>                                                                                     |
|                                | 6-<12                                                                                                                                                                                                                                        | 3,672      | <10 <sup>6</sup>                | <10 <sup>6</sup>                  | <10 <sup>6</sup>                    | <10 <sup>6</sup>                                                                                     |
|                                | 12-<24                                                                                                                                                                                                                                       | 2,832      | <10 <sup>6</sup>                | <10 <sup>6</sup>                  | <10 <sup>6</sup>                    | <10 <sup>6</sup>                                                                                     |
|                                | 24+                                                                                                                                                                                                                                          | 2,624      | <10 <sup>6</sup>                | <10 <sup>6</sup>                  | <10 <sup>6</sup>                    | <10 <sup>6</sup>                                                                                     |
| 2018/19                        | <1                                                                                                                                                                                                                                           | 4,801      | <10 <sup>6</sup>                | <10 <sup>6</sup>                  | <10 <sup>6</sup>                    | <10 <sup>6</sup>                                                                                     |
|                                | 1-<6                                                                                                                                                                                                                                         | 7,742      | <10 <sup>6</sup>                | <10 <sup>6</sup>                  | <10 <sup>6</sup>                    | <10 <sup>6</sup>                                                                                     |
|                                | 6-<12                                                                                                                                                                                                                                        | 3,616      | <10 <sup>6</sup>                | <10 <sup>6</sup>                  | <10 <sup>6</sup>                    | <10 <sup>6</sup>                                                                                     |
|                                | 12-<24                                                                                                                                                                                                                                       | 3,447      | <10 <sup>6</sup>                | <10 <sup>6</sup>                  | <10 <sup>6</sup>                    | <10 <sup>6</sup>                                                                                     |
|                                | 24+                                                                                                                                                                                                                                          | 2,493      | <10 <sup>6</sup>                | <10 <sup>6</sup>                  | <10 <sup>6</sup>                    | <10 <sup>6</sup>                                                                                     |
| 2019/20                        | <1                                                                                                                                                                                                                                           | 5,745      | <10 <sup>6</sup>                | <10 <sup>6</sup>                  | <10 <sup>6</sup>                    | <10 <sup>6</sup>                                                                                     |
|                                | 1-<6                                                                                                                                                                                                                                         | 9,697      | <10 <sup>6</sup>                | <10 <sup>6</sup>                  | <10 <sup>6</sup>                    | <10 <sup>6</sup>                                                                                     |
|                                | 6-<12                                                                                                                                                                                                                                        | 5,090      | <10 <sup>6</sup>                | <10 <sup>6</sup>                  | <10 <sup>6</sup>                    | <10 <sup>6</sup>                                                                                     |
|                                | 12-<24                                                                                                                                                                                                                                       | 3,244      | <10 <sup>6</sup>                | <10 <sup>6</sup>                  | <10 <sup>6</sup>                    | <10 <sup>6</sup>                                                                                     |
|                                | 24+                                                                                                                                                                                                                                          | 2,035      | <10 <sup>6</sup>                | <10 <sup>6</sup>                  | <10 <sup>6</sup>                    | <10 <sup>6</sup>                                                                                     |
| <b>Ethnic Group</b>            |                                                                                                                                                                                                                                              |            |                                 |                                   |                                     |                                                                                                      |
| 2017/18                        | White                                                                                                                                                                                                                                        | 15,638     | <10 <sup>6</sup>                | <10 <sup>6</sup>                  | <10 <sup>6</sup>                    | <10 <sup>6</sup>                                                                                     |
|                                | Mixed                                                                                                                                                                                                                                        | 431        | <10 <sup>6</sup>                | <10 <sup>6</sup>                  | <10 <sup>6</sup>                    | <10 <sup>6</sup>                                                                                     |
|                                | Asian or Asian British                                                                                                                                                                                                                       | 813        | <10 <sup>6</sup>                | <10 <sup>6</sup>                  | <10 <sup>6</sup>                    | <10 <sup>6</sup>                                                                                     |
|                                | Black or Black British                                                                                                                                                                                                                       | 404        | <10 <sup>6</sup>                | <10 <sup>6</sup>                  | <10 <sup>6</sup>                    | <10 <sup>6</sup>                                                                                     |
|                                | Chinese and Other                                                                                                                                                                                                                            | 214        | <10 <sup>6</sup>                | <10 <sup>6</sup>                  | <10 <sup>6</sup>                    | <10 <sup>6</sup>                                                                                     |
|                                | Unclassified                                                                                                                                                                                                                                 | 372        | <10 <sup>6</sup>                | <10 <sup>6</sup>                  | <10 <sup>6</sup>                    | <10 <sup>6</sup>                                                                                     |
| 2018/19                        | White                                                                                                                                                                                                                                        | 14,911     | 10 (0.1)                        | <10 <sup>6</sup>                  | <10 <sup>6</sup>                    | <10 <sup>6</sup>                                                                                     |
|                                | Mixed                                                                                                                                                                                                                                        | 371        | <10 <sup>6</sup>                | <10 <sup>6</sup>                  | <10 <sup>6</sup>                    | <10 <sup>6</sup>                                                                                     |
|                                | Asian or Asian British                                                                                                                                                                                                                       | 726        | <10 <sup>6</sup>                | <10 <sup>6</sup>                  | <10 <sup>6</sup>                    | <10 <sup>6</sup>                                                                                     |
|                                | Black or Black British                                                                                                                                                                                                                       | 364        | <10 <sup>6</sup>                | <10 <sup>6</sup>                  | <10 <sup>6</sup>                    | <10 <sup>6</sup>                                                                                     |
|                                | Chinese and Other                                                                                                                                                                                                                            | 167        | <10 <sup>6</sup>                | <10 <sup>6</sup>                  | <10 <sup>6</sup>                    | <10 <sup>6</sup>                                                                                     |
|                                | Unclassified                                                                                                                                                                                                                                 | 409        | <10 <sup>6</sup>                | <10 <sup>6</sup>                  | <10 <sup>6</sup>                    | <10 <sup>6</sup>                                                                                     |
| 2019/20                        | White                                                                                                                                                                                                                                        | 16,606     | 16 (0.1)                        | <10 <sup>6</sup>                  | <10 <sup>6</sup>                    | <10 <sup>6</sup>                                                                                     |
|                                | Mixed                                                                                                                                                                                                                                        | 409        | <10 <sup>6</sup>                | <10 <sup>6</sup>                  | <10 <sup>6</sup>                    | <10 <sup>6</sup>                                                                                     |
|                                | Asian or Asian British                                                                                                                                                                                                                       | 755        | <10 <sup>6</sup>                | <10 <sup>6</sup>                  | <10 <sup>6</sup>                    | <10 <sup>6</sup>                                                                                     |
|                                | Black or Black British                                                                                                                                                                                                                       | 451        | <10 <sup>6</sup>                | <10 <sup>6</sup>                  | <10 <sup>6</sup>                    | <10 <sup>6</sup>                                                                                     |
|                                | Chinese and Other                                                                                                                                                                                                                            | 163        | <10 <sup>6</sup>                | <10 <sup>6</sup>                  | <10 <sup>6</sup>                    | <10 <sup>6</sup>                                                                                     |
|                                | Unclassified                                                                                                                                                                                                                                 | 387        | <10 <sup>6</sup>                | <10 <sup>6</sup>                  | <10 <sup>6</sup>                    | <10 <sup>6</sup>                                                                                     |

<sup>1</sup>Eligible for indicator; <sup>2</sup>Achieve in current prison; <sup>3</sup>Achieve in previous prison; <sup>4</sup>Overall achievement - either current or previous prison; <sup>5</sup>Declined indicator; <sup>6</sup>Suppressed (<10) to avoid disclosure



| Indicator              | The proportion of people who have had a myocardial infarction and are have received a prescription for an ACE-inhibitor or angiotensin receptor blocker, anti-platelet therapy, beta-blocker and a statin in the preceding 12 months |                                    |                                          |                                           |                                          |                                                     |                                                    | no comparable data in QOF 2019/20 data. Latest was QOF 2014/15 in which achievement was 70.57% |  |  |
|------------------------|--------------------------------------------------------------------------------------------------------------------------------------------------------------------------------------------------------------------------------------|------------------------------------|------------------------------------------|-------------------------------------------|------------------------------------------|-----------------------------------------------------|----------------------------------------------------|------------------------------------------------------------------------------------------------|--|--|
|                        | Group: Cardiovascular Disease                                                                                                                                                                                                        |                                    |                                          |                                           |                                          |                                                     |                                                    |                                                                                                |  |  |
| Variable               | Population                                                                                                                                                                                                                           | Eligible <sup>1</sup><br>(% popln) | Satisfy All <sup>2</sup><br>(% eligible) | Satisfy ACEI <sup>2</sup><br>(% eligible) | Satisfy ARB <sup>2</sup><br>(% eligible) | Satisfy Anti Platelet <sup>2</sup> (%)<br>eligible) | Satisfy Beta Blocker <sup>2</sup> (%)<br>eligible) | Satisfy Statin <sup>2</sup><br>(% eligible)                                                    |  |  |
| <b>Year</b>            |                                                                                                                                                                                                                                      |                                    |                                          |                                           |                                          |                                                     |                                                    |                                                                                                |  |  |
| 2017/18                | 21,677                                                                                                                                                                                                                               | 343 (1.6)                          | <10 <sup>6</sup>                         | 130 (37.9)                                | <10 <sup>6</sup>                         | 202 (58.9)                                          | 192 (56.0)                                         | 254 (74.1)                                                                                     |  |  |
| 2018/19                | 22,099                                                                                                                                                                                                                               | 429 (1.9)                          | <10 <sup>6</sup>                         | 172 (40.1)                                | <10 <sup>6</sup>                         | 254 (59.2)                                          | 240 (55.9)                                         | 292 (68.1)                                                                                     |  |  |
| 2019/20                | 25,811                                                                                                                                                                                                                               | 492 (1.9)                          | <10 <sup>6</sup>                         | 207 (42.1)                                | <10 <sup>6</sup>                         | 300 (61.0)                                          | 280 (56.9)                                         | 346 (70.3)                                                                                     |  |  |
| <b>Prison</b>          |                                                                                                                                                                                                                                      |                                    |                                          |                                           |                                          |                                                     |                                                    |                                                                                                |  |  |
| 2017/18                |                                                                                                                                                                                                                                      |                                    |                                          |                                           |                                          |                                                     |                                                    |                                                                                                |  |  |
| Prison 1               | 1,323                                                                                                                                                                                                                                | <10 <sup>6</sup>                   | <10 <sup>6</sup>                         | <10 <sup>6</sup>                          | <10 <sup>6</sup>                         | <10 <sup>6</sup>                                    | <10 <sup>6</sup>                                   | <10 <sup>6</sup>                                                                               |  |  |
| Prison 2               | 3,261                                                                                                                                                                                                                                | 47 (1.4)                           | <10 <sup>6</sup>                         | 15 (31.9)                                 | <10 <sup>6</sup>                         | 25 (53.2)                                           | 19 (40.4)                                          | 24 (51.1)                                                                                      |  |  |
| Prison 3               | 2,623                                                                                                                                                                                                                                | 35 (1.3)                           | <10 <sup>6</sup>                         | <10 <sup>6</sup>                          | <10 <sup>6</sup>                         | 20 (57.1)                                           | 22 (62.9)                                          | 27 (77.1)                                                                                      |  |  |
| Prison 4               | 2,089                                                                                                                                                                                                                                | 42 (2.0)                           | <10 <sup>6</sup>                         | 18 (42.9)                                 | <10 <sup>6</sup>                         | 32 (76.2)                                           | 28 (66.7)                                          | 33 (78.6)                                                                                      |  |  |
| Prison 5               | 637                                                                                                                                                                                                                                  | <10 <sup>6</sup>                   | <10 <sup>6</sup>                         | <10 <sup>6</sup>                          | <10 <sup>6</sup>                         | <10 <sup>6</sup>                                    | <10 <sup>6</sup>                                   | <10 <sup>6</sup>                                                                               |  |  |
| Prison 6               | 1,552                                                                                                                                                                                                                                | 33 (2.1)                           | <10 <sup>6</sup>                         | 15 (45.5)                                 | <10 <sup>6</sup>                         | <10 <sup>6</sup>                                    | 17 (51.5)                                          | 23 (69.7)                                                                                      |  |  |
| Prison 7               | 635                                                                                                                                                                                                                                  | <10 <sup>6</sup>                   | <10 <sup>6</sup>                         | <10 <sup>6</sup>                          | <10 <sup>6</sup>                         | <10 <sup>6</sup>                                    | <10 <sup>6</sup>                                   | <10 <sup>6</sup>                                                                               |  |  |
| Prison 8               | 1,085                                                                                                                                                                                                                                | 12 (1.1)                           | <10 <sup>6</sup>                         | <10 <sup>6</sup>                          | <10 <sup>6</sup>                         | <10 <sup>6</sup>                                    | <10 <sup>6</sup>                                   | 10 (83.3)                                                                                      |  |  |
| Prison 9               | 981                                                                                                                                                                                                                                  | 52 (5.3)                           | <10 <sup>6</sup>                         | 23 (44.2)                                 | <10 <sup>6</sup>                         | 40 (76.9)                                           | 28 (53.8)                                          | 44 (84.6)                                                                                      |  |  |
| Prison 10              | 2,523                                                                                                                                                                                                                                | 16 (0.6)                           | <10 <sup>6</sup>                         | 12 (75.0)                                 | <10 <sup>6</sup>                         | 11 (68.8)                                           | 11 (68.8)                                          | 14 (87.5)                                                                                      |  |  |
| Prison 11              | 3,470                                                                                                                                                                                                                                | 50 (1.4)                           | <10 <sup>6</sup>                         | 15 (30.0)                                 | <10 <sup>6</sup>                         | 27 (54.0)                                           | 31 (62.0)                                          | 35 (70.0)                                                                                      |  |  |
| Prison 12              | 815                                                                                                                                                                                                                                  | <10 <sup>6</sup>                   | <10 <sup>6</sup>                         | <10 <sup>6</sup>                          | <10 <sup>6</sup>                         | <10 <sup>6</sup>                                    | <10 <sup>6</sup>                                   | <10 <sup>6</sup>                                                                               |  |  |
| Prison 13              | 683                                                                                                                                                                                                                                  | 34 (5.0)                           | <10 <sup>6</sup>                         | 15 (44.1)                                 | <10 <sup>6</sup>                         | 26 (76.5)                                           | 19 (55.9)                                          | 28 (82.4)                                                                                      |  |  |
| 2018/19                |                                                                                                                                                                                                                                      |                                    |                                          |                                           |                                          |                                                     |                                                    |                                                                                                |  |  |
| Prison 1               | 1,333                                                                                                                                                                                                                                | 10 (0.8)                           | <10 <sup>6</sup>                         | <10 <sup>6</sup>                          | <10 <sup>6</sup>                         | <10 <sup>6</sup>                                    | <10 <sup>6</sup>                                   | <10 <sup>6</sup>                                                                               |  |  |
| Prison 2               | 2,705                                                                                                                                                                                                                                | 42 (1.6)                           | <10 <sup>6</sup>                         | 22 (52.4)                                 | <10 <sup>6</sup>                         | 29 (69.0)                                           | 24 (57.1)                                          | 28 (66.7)                                                                                      |  |  |
| Prison 3               | 2,522                                                                                                                                                                                                                                | 32 (1.3)                           | <10 <sup>6</sup>                         | <10 <sup>6</sup>                          | <10 <sup>6</sup>                         | 20 (62.5)                                           | 19 (59.4)                                          | 24 (75.0)                                                                                      |  |  |
| Prison 4               | 2,349                                                                                                                                                                                                                                | 57 (2.4)                           | <10 <sup>6</sup>                         | 26 (45.6)                                 | <10 <sup>6</sup>                         | 37 (64.9)                                           | 34 (59.6)                                          | 45 (78.9)                                                                                      |  |  |
| Prison 5               | 676                                                                                                                                                                                                                                  | 14 (2.1)                           | <10 <sup>6</sup>                         | <10 <sup>6</sup>                          | <10 <sup>6</sup>                         | <10 <sup>6</sup>                                    | <10 <sup>6</sup>                                   | <10 <sup>6</sup>                                                                               |  |  |
| Prison 6               | 1,513                                                                                                                                                                                                                                | 32 (2.1)                           | <10 <sup>6</sup>                         | 12 (37.5)                                 | <10 <sup>6</sup>                         | 19 (59.4)                                           | 16 (50.0)                                          | 21 (65.6)                                                                                      |  |  |
| Prison 7               | 654                                                                                                                                                                                                                                  | <10 <sup>6</sup>                   | <10 <sup>6</sup>                         | <10 <sup>6</sup>                          | <10 <sup>6</sup>                         | <10 <sup>6</sup>                                    | <10 <sup>6</sup>                                   | <10 <sup>6</sup>                                                                               |  |  |
| Prison 8               | 1,148                                                                                                                                                                                                                                | 23 (2.0)                           | <10 <sup>6</sup>                         | <10 <sup>6</sup>                          | <10 <sup>6</sup>                         | 11 (47.8)                                           | <10 <sup>6</sup>                                   | 12 (52.2)                                                                                      |  |  |
| Prison 9               | 996                                                                                                                                                                                                                                  | 54 (5.4)                           | <10 <sup>6</sup>                         | 26 (48.1)                                 | <10 <sup>6</sup>                         | 41 (75.9)                                           | 34 (63.0)                                          | 46 (85.2)                                                                                      |  |  |
| Prison 10              | 2,717                                                                                                                                                                                                                                | 55 (2.0)                           | <10 <sup>6</sup>                         | 21 (38.2)                                 | <10 <sup>6</sup>                         | 26 (47.3)                                           | 28 (50.9)                                          | 30 (54.5)                                                                                      |  |  |
| Prison 11              | 4,020                                                                                                                                                                                                                                | 65 (1.6)                           | <10 <sup>6</sup>                         | 21 (32.3)                                 | <10 <sup>6</sup>                         | 30 (46.2)                                           | 36 (55.4)                                          | 38 (58.5)                                                                                      |  |  |
| Prison 12              | 792                                                                                                                                                                                                                                  | <10 <sup>6</sup>                   | <10 <sup>6</sup>                         | <10 <sup>6</sup>                          | <10 <sup>6</sup>                         | <10 <sup>6</sup>                                    | <10 <sup>6</sup>                                   | <10 <sup>6</sup>                                                                               |  |  |
| Prison 13              | 674                                                                                                                                                                                                                                  | 37 (5.5)                           | <10 <sup>6</sup>                         | 18 (48.6)                                 | <10 <sup>6</sup>                         | 23 (62.2)                                           | 24 (64.9)                                          | 30 (81.1)                                                                                      |  |  |
| 2019/20                |                                                                                                                                                                                                                                      |                                    |                                          |                                           |                                          |                                                     |                                                    |                                                                                                |  |  |
| Prison 1               | 1,410                                                                                                                                                                                                                                | 22 (1.6)                           | <10 <sup>6</sup>                         | <10 <sup>6</sup>                          | <10 <sup>6</sup>                         | 12 (54.5)                                           | 11 (50.0)                                          | 12 (54.5)                                                                                      |  |  |
| Prison 2               | 2,979                                                                                                                                                                                                                                | 48 (1.6)                           | <10 <sup>6</sup>                         | 24 (50.0)                                 | <10 <sup>6</sup>                         | 37 (77.1)                                           | 29 (60.4)                                          | 39 (81.3)                                                                                      |  |  |
| Prison 3               | 2,809                                                                                                                                                                                                                                | 40 (1.4)                           | <10 <sup>6</sup>                         | 17 (42.5)                                 | <10 <sup>6</sup>                         | 20 (50.0)                                           | 21 (52.5)                                          | 29 (72.5)                                                                                      |  |  |
| Prison 4               | 2,651                                                                                                                                                                                                                                | 80 (3.0)                           | <10 <sup>6</sup>                         | 44 (55.0)                                 | <10 <sup>6</sup>                         | 58 (72.5)                                           | 54 (67.5)                                          | 65 (81.3)                                                                                      |  |  |
| Prison 5               | 616                                                                                                                                                                                                                                  | 10 (1.6)                           | <10 <sup>6</sup>                         | <10 <sup>6</sup>                          | <10 <sup>6</sup>                         | <10 <sup>6</sup>                                    | <10 <sup>6</sup>                                   | <10 <sup>6</sup>                                                                               |  |  |
| Prison 6               | 1,533                                                                                                                                                                                                                                | 29 (1.9)                           | <10 <sup>6</sup>                         | 12 (41.4)                                 | <10 <sup>6</sup>                         | 17 (58.6)                                           | 13 (44.8)                                          | 23 (79.3)                                                                                      |  |  |
| Prison 7               | 860                                                                                                                                                                                                                                  | 12 (1.4)                           | <10 <sup>6</sup>                         | <10 <sup>6</sup>                          | <10 <sup>6</sup>                         | <10 <sup>6</sup>                                    | <10 <sup>6</sup>                                   | <10 <sup>6</sup>                                                                               |  |  |
| Prison 8               | 1,385                                                                                                                                                                                                                                | 20 (1.4)                           | <10 <sup>6</sup>                         | <10 <sup>6</sup>                          | <10 <sup>6</sup>                         | 10 (50.0)                                           | <10 <sup>6</sup>                                   | <10 <sup>6</sup>                                                                               |  |  |
| Prison 9               | 1,092                                                                                                                                                                                                                                | 65 (6.0)                           | <10 <sup>6</sup>                         | 33 (50.8)                                 | <10 <sup>6</sup>                         | 44 (67.7)                                           | 41 (63.1)                                          | 51 (78.5)                                                                                      |  |  |
| Prison 10              | 3,577                                                                                                                                                                                                                                | 58 (1.6)                           | <10 <sup>6</sup>                         | 21 (36.2)                                 | <10 <sup>6</sup>                         | 26 (44.8)                                           | 32 (55.2)                                          | 31 (53.4)                                                                                      |  |  |
| Prison 11              | 5,348                                                                                                                                                                                                                                | 71 (1.3)                           | <10 <sup>6</sup>                         | 31 (43.7)                                 | <10 <sup>6</sup>                         | 44 (62.0)                                           | 39 (54.9)                                          | 48 (67.6)                                                                                      |  |  |
| Prison 12              | 805                                                                                                                                                                                                                                  | <10 <sup>6</sup>                   | <10 <sup>6</sup>                         | <10 <sup>6</sup>                          | <10 <sup>6</sup>                         | <10 <sup>6</sup>                                    | <10 <sup>6</sup>                                   | <10 <sup>6</sup>                                                                               |  |  |
| Prison 13              | 746                                                                                                                                                                                                                                  | 37 (5.0)                           | <10 <sup>6</sup>                         | 13 (35.1)                                 | <10 <sup>6</sup>                         | 22 (59.5)                                           | 24 (64.9)                                          | 29 (78.4)                                                                                      |  |  |
| <b>Prison category</b> |                                                                                                                                                                                                                                      |                                    |                                          |                                           |                                          |                                                     |                                                    |                                                                                                |  |  |
| 2017/18                |                                                                                                                                                                                                                                      |                                    |                                          |                                           |                                          |                                                     |                                                    |                                                                                                |  |  |
| A                      | 1,664                                                                                                                                                                                                                                | 86 (5.2)                           | <10 <sup>6</sup>                         | 38 (44.2)                                 | <10 <sup>6</sup>                         | 66 (76.7)                                           | 47 (54.7)                                          | 72 (83.7)                                                                                      |  |  |
| B                      | 9,254                                                                                                                                                                                                                                | 113 (1.2)                          | <10 <sup>6</sup>                         | 42 (37.2)                                 | <10 <sup>6</sup>                         | 63 (55.8)                                           | 61 (54.0)                                          | 73 (64.6)                                                                                      |  |  |
| C                      | 6,035                                                                                                                                                                                                                                | 85 (1.4)                           | <10 <sup>6</sup>                         | 26 (30.6)                                 | <10 <sup>6</sup>                         | 57 (67.1)                                           | 55 (64.7)                                          | 66 (77.6)                                                                                      |  |  |
| Closed                 | 1,720                                                                                                                                                                                                                                | 18 (1.0)                           | <10 <sup>6</sup>                         | <10 <sup>6</sup>                          | <10 <sup>6</sup>                         | <10 <sup>6</sup>                                    | <10 <sup>6</sup>                                   | 13 (72.2)                                                                                      |  |  |
| D                      | 2,189                                                                                                                                                                                                                                | 41 (1.9)                           | <10 <sup>6</sup>                         | 17 (41.5)                                 | <10 <sup>6</sup>                         | <10 <sup>6</sup>                                    | 23 (56.1)                                          | 30 (73.2)                                                                                      |  |  |
| YOI                    | 815                                                                                                                                                                                                                                  | <10 <sup>6</sup>                   | <10 <sup>6</sup>                         | <10 <sup>6</sup>                          | <10 <sup>6</sup>                         | <10 <sup>6</sup>                                    | <10 <sup>6</sup>                                   | <10 <sup>6</sup>                                                                               |  |  |
| 2018/19                |                                                                                                                                                                                                                                      |                                    |                                          |                                           |                                          |                                                     |                                                    |                                                                                                |  |  |
| A                      | 1,670                                                                                                                                                                                                                                | 91 (5.4)                           | <10 <sup>6</sup>                         | 44 (48.4)                                 | <10 <sup>6</sup>                         | 64 (70.3)                                           | 58 (63.7)                                          | 76 (83.5)                                                                                      |  |  |
| B                      | 9,442                                                                                                                                                                                                                                | 162 (1.7)                          | <10 <sup>6</sup>                         | 64 (39.5)                                 | <10 <sup>6</sup>                         | 85 (52.5)                                           | 88 (54.3)                                          | 96 (59.3)                                                                                      |  |  |
| C                      | 6,204                                                                                                                                                                                                                                | 99 (1.6)                           | <10 <sup>6</sup>                         | 39 (39.4)                                 | <10 <sup>6</sup>                         | 63 (63.6)                                           | 57 (57.6)                                          | 75 (75.8)                                                                                      |  |  |
| Closed                 | 1,802                                                                                                                                                                                                                                | 29 (1.6)                           | <10 <sup>6</sup>                         | <10 <sup>6</sup>                          | <10 <sup>6</sup>                         | 14 (48.3)                                           | 11 (37.9)                                          | 15 (51.7)                                                                                      |  |  |
| D                      | 2,189                                                                                                                                                                                                                                | 46 (2.1)                           | <10 <sup>6</sup>                         | 16 (34.8)                                 | <10 <sup>6</sup>                         | 27 (58.7)                                           | 25 (54.3)                                          | 30 (65.2)                                                                                      |  |  |
| YOI                    | 792                                                                                                                                                                                                                                  | <10 <sup>6</sup>                   | <10 <sup>6</sup>                         | <10 <sup>6</sup>                          | <10 <sup>6</sup>                         | <10 <sup>6</sup>                                    | <10 <sup>6</sup>                                   | <10 <sup>6</sup>                                                                               |  |  |
| 2019/20                |                                                                                                                                                                                                                                      |                                    |                                          |                                           |                                          |                                                     |                                                    |                                                                                                |  |  |
| A                      | 1,838                                                                                                                                                                                                                                | 102 (5.5)                          | <10 <sup>6</sup>                         | 46 (45.1)                                 | <10 <sup>6</sup>                         | 66 (64.7)                                           | 65 (63.7)                                          | 80 (78.4)                                                                                      |  |  |
| B                      | 11,904                                                                                                                                                                                                                               | 177 (1.5)                          | <10 <sup>6</sup>                         | 76 (42.9)                                 | <10 <sup>6</sup>                         | 107 (60.5)                                          | 100 (56.5)                                         | 118 (66.7)                                                                                     |  |  |
| C                      | 6,870                                                                                                                                                                                                                                | 142 (2.1)                          | <10 <sup>6</sup>                         | 61 (43.0)                                 | <10 <sup>6</sup>                         | 90 (63.4)                                           | 86 (60.6)                                          | 106 (74.6)                                                                                     |  |  |
| Closed                 | 2,245                                                                                                                                                                                                                                | 32 (1.4)                           | <10 <sup>6</sup>                         | <10 <sup>6</sup>                          | <10 <sup>6</sup>                         | 15 (46.9)                                           | 10 (31.3)                                          | 13 (40.6)                                                                                      |  |  |
| D                      | 2,149                                                                                                                                                                                                                                | 39 (1.8)                           | <10 <sup>6</sup>                         | 16 (41.0)                                 | <10 <sup>6</sup>                         | 22 (56.4)                                           | 19 (48.7)                                          | 29 (74.4)                                                                                      |  |  |
| YOI                    | 805                                                                                                                                                                                                                                  | <10 <sup>6</sup>                   | <10 <sup>6</sup>                         | <10 <sup>6</sup>                          | <10 <sup>6</sup>                         | <10 <sup>6</sup>                                    | <10 <sup>6</sup>                                   | <10 <sup>6</sup>                                                                               |  |  |
| <b>Gender</b>          |                                                                                                                                                                                                                                      |                                    |                                          |                                           |                                          |                                                     |                                                    |                                                                                                |  |  |
| 2017/18                |                                                                                                                                                                                                                                      |                                    |                                          |                                           |                                          |                                                     |                                                    |                                                                                                |  |  |
| F                      | 1,699                                                                                                                                                                                                                                | 18 (1.1)                           | <10 <sup>6</sup>                         | <10 <sup>6</sup>                          | <10 <sup>6</sup>                         | <10 <sup>6</sup>                                    | <10 <sup>6</sup>                                   | 13 (72.2)                                                                                      |  |  |
| M                      | 19,977                                                                                                                                                                                                                               | 325 (1.6)                          | <10 <sup>6</sup>                         | 123 (37.8)                                | <10 <sup>6</sup>                         | 193 (59.4)                                          | 186 (57.2)                                         | 241 (74.2)                                                                                     |  |  |
| 2018/19                |                                                                                                                                                                                                                                      |                                    |                                          |                                           |                                          |                                                     |                                                    |                                                                                                |  |  |
| F                      | 1,802                                                                                                                                                                                                                                | 28 (1.6)                           | <10 <sup>6</sup>                         | <10 <sup>6</sup>                          | <10 <sup>6</sup>                         | 13 (46.4)                                           | 10 (35.7)                                          | 14 (50.0)                                                                                      |  |  |
| M                      | 20,295                                                                                                                                                                                                                               | 401 (2.0)                          | <10 <sup>6</sup>                         | 164 (40.9)                                | <10 <sup>6</sup>                         | 241 (60.1)                                          | 230 (57.4)                                         | 278 (69.3)                                                                                     |  |  |
| 2019/20                |                                                                                                                                                                                                                                      |                                    |                                          |                                           |                                          |                                                     |                                                    |                                                                                                |  |  |
| F                      | 1,376                                                                                                                                                                                                                                | 20 (1.5)                           | <10 <sup>6</sup>                         | <10 <sup>6</sup>                          | <10 <sup>6</sup>                         | 10 (50.0)                                           | <10 <sup>6</sup>                                   | <10 <sup>6</sup>                                                                               |  |  |
| M                      | 23,570                                                                                                                                                                                                                               | 460 (2.0)                          | <10 <sup>6</sup>                         | 199 (43.3)                                | <10 <sup>6</sup>                         | 285 (62.0)                                          | 270 (58.7)                                         | 333 (72.4)                                                                                     |  |  |

<sup>1</sup>Eligible for indicator; <sup>2</sup>Achieve in current prison; <sup>3</sup>Achieve in previous prison; <sup>4</sup>Overall achievement - either current or previous prison; <sup>5</sup>Declined indicator; <sup>6</sup>Suppressed (<10) to avoid disclosure

| Indicator              | The proportion of people who have had a myocardial infarction and are have received a prescription for an ACE-inhibitor or angiotensin receptor blocker, anti-platelet therapy, beta-blocker and a statin in the preceding 12 months |                                    |                                          |                                           |                                          |                                                 | no comparable data in QOF 2019/20 data. Latest was QOF 2014/15 in which achievement was 70.57% |                                             |                  |
|------------------------|--------------------------------------------------------------------------------------------------------------------------------------------------------------------------------------------------------------------------------------|------------------------------------|------------------------------------------|-------------------------------------------|------------------------------------------|-------------------------------------------------|------------------------------------------------------------------------------------------------|---------------------------------------------|------------------|
|                        | Group: Cardiovascular Disease                                                                                                                                                                                                        |                                    |                                          |                                           |                                          |                                                 |                                                                                                |                                             |                  |
| Variable               | Population                                                                                                                                                                                                                           | Eligible <sup>1</sup><br>(% popln) | Satisfy All <sup>2</sup><br>(% eligible) | Satisfy ACEI <sup>2</sup><br>(% eligible) | Satisfy ARB <sup>2</sup><br>(% eligible) | Satisfy Anti Platelet <sup>2</sup> (% eligible) | Satisfy Beta Blocker <sup>2</sup> (%)<br>eligible)                                             | Satisfy Statin <sup>2</sup><br>(% eligible) |                  |
| <b>Sentence Status</b> |                                                                                                                                                                                                                                      |                                    |                                          |                                           |                                          |                                                 |                                                                                                |                                             |                  |
| 2017/18                | .                                                                                                                                                                                                                                    | 81                                 | <10 <sup>6</sup>                         | <10 <sup>6</sup>                          | <10 <sup>6</sup>                         | <10 <sup>6</sup>                                | <10 <sup>6</sup>                                                                               | <10 <sup>6</sup>                            | <10 <sup>6</sup> |
|                        | Abscinded                                                                                                                                                                                                                            | <10 <sup>6</sup>                   | <10 <sup>6</sup>                         | <10 <sup>6</sup>                          | <10 <sup>6</sup>                         | <10 <sup>6</sup>                                | <10 <sup>6</sup>                                                                               | <10 <sup>6</sup>                            | <10 <sup>6</sup> |
|                        | Active In                                                                                                                                                                                                                            | 15,872                             | 267 (1.7)                                | <10 <sup>6</sup>                          | 107 (40.1)                               | <10 <sup>6</sup>                                | 168 (62.9)                                                                                     | 157 (58.8)                                  | 211 (79.0)       |
|                        | Active Out                                                                                                                                                                                                                           | 1,052                              | 13 (1.2)                                 | <10 <sup>6</sup>                          | <10 <sup>6</sup>                         | <10 <sup>6</sup>                                | <10 <sup>6</sup>                                                                               | <10 <sup>6</sup>                            | <10 <sup>6</sup> |
|                        | Convicted Sentence                                                                                                                                                                                                                   | 2,125                              | 27 (1.3)                                 | <10 <sup>6</sup>                          | <10 <sup>6</sup>                         | <10 <sup>6</sup>                                | 16 (59.3)                                                                                      | 14 (51.9)                                   | 17 (63.0)        |
|                        | Downgrade in security category                                                                                                                                                                                                       | <10 <sup>6</sup>                   | <10 <sup>6</sup>                         | <10 <sup>6</sup>                          | <10 <sup>6</sup>                         | <10 <sup>6</sup>                                | <10 <sup>6</sup>                                                                               | <10 <sup>6</sup>                            | <10 <sup>6</sup> |
|                        | Internal Cell Move                                                                                                                                                                                                                   | <10 <sup>6</sup>                   | <10 <sup>6</sup>                         | <10 <sup>6</sup>                          | <10 <sup>6</sup>                         | <10 <sup>6</sup>                                | <10 <sup>6</sup>                                                                               | <10 <sup>6</sup>                            | <10 <sup>6</sup> |
|                        | Judges Remand                                                                                                                                                                                                                        | 92                                 | <10 <sup>6</sup>                         | <10 <sup>6</sup>                          | <10 <sup>6</sup>                         | <10 <sup>6</sup>                                | <10 <sup>6</sup>                                                                               | <10 <sup>6</sup>                            | <10 <sup>6</sup> |
|                        | Licence Revoke                                                                                                                                                                                                                       | 52                                 | <10 <sup>6</sup>                         | <10 <sup>6</sup>                          | <10 <sup>6</sup>                         | <10 <sup>6</sup>                                | <10 <sup>6</sup>                                                                               | <10 <sup>6</sup>                            | <10 <sup>6</sup> |
|                        | On Remand                                                                                                                                                                                                                            | 1,492                              | 17 (1.1)                                 | <10 <sup>6</sup>                          | <10 <sup>6</sup>                         | <10 <sup>6</sup>                                | 11 (64.7)                                                                                      | <10 <sup>6</sup>                            | <10 <sup>6</sup> |
|                        | Transfer                                                                                                                                                                                                                             | 910                                | 16 (1.8)                                 | <10 <sup>6</sup>                          | <10 <sup>6</sup>                         | <10 <sup>6</sup>                                | <10 <sup>6</sup>                                                                               | <10 <sup>6</sup>                            | 11 (68.8)        |
|                        | Upgrade in security category                                                                                                                                                                                                         | <10 <sup>6</sup>                   | <10 <sup>6</sup>                         | <10 <sup>6</sup>                          | <10 <sup>6</sup>                         | <10 <sup>6</sup>                                | <10 <sup>6</sup>                                                                               | <10 <sup>6</sup>                            | <10 <sup>6</sup> |
| 2018/19                | .                                                                                                                                                                                                                                    | 88                                 | <10 <sup>6</sup>                         | <10 <sup>6</sup>                          | <10 <sup>6</sup>                         | <10 <sup>6</sup>                                | <10 <sup>6</sup>                                                                               | <10 <sup>6</sup>                            | <10 <sup>6</sup> |
|                        | Abscinded                                                                                                                                                                                                                            | <10 <sup>6</sup>                   | <10 <sup>6</sup>                         | <10 <sup>6</sup>                          | <10 <sup>6</sup>                         | <10 <sup>6</sup>                                | <10 <sup>6</sup>                                                                               | <10 <sup>6</sup>                            | <10 <sup>6</sup> |
|                        | Active In                                                                                                                                                                                                                            | 18,145                             | 363 (2.0)                                | <10 <sup>6</sup>                          | 144 (39.7)                               | <10 <sup>6</sup>                                | 220 (60.6)                                                                                     | 205 (56.5)                                  | 255 (70.2)       |
|                        | Active Out                                                                                                                                                                                                                           | 835                                | 18 (2.2)                                 | <10 <sup>6</sup>                          | <10 <sup>6</sup>                         | <10 <sup>6</sup>                                | <10 <sup>6</sup>                                                                               | <10 <sup>6</sup>                            | <10 <sup>6</sup> |
|                        | Convicted Sentence                                                                                                                                                                                                                   | 1,320                              | 21 (1.6)                                 | <10 <sup>6</sup>                          | 10 (47.6)                                | <10 <sup>6</sup>                                | 14 (66.7)                                                                                      | 14 (66.7)                                   | 14 (66.7)        |
|                        | Downgrade in security category                                                                                                                                                                                                       | <10 <sup>6</sup>                   | <10 <sup>6</sup>                         | <10 <sup>6</sup>                          | <10 <sup>6</sup>                         | <10 <sup>6</sup>                                | <10 <sup>6</sup>                                                                               | <10 <sup>6</sup>                            | <10 <sup>6</sup> |
|                        | Internal Cell Move                                                                                                                                                                                                                   | <10 <sup>6</sup>                   | <10 <sup>6</sup>                         | <10 <sup>6</sup>                          | <10 <sup>6</sup>                         | <10 <sup>6</sup>                                | <10 <sup>6</sup>                                                                               | <10 <sup>6</sup>                            | <10 <sup>6</sup> |
|                        | Judges Remand                                                                                                                                                                                                                        | <10 <sup>6</sup>                   | <10 <sup>6</sup>                         | <10 <sup>6</sup>                          | <10 <sup>6</sup>                         | <10 <sup>6</sup>                                | <10 <sup>6</sup>                                                                               | <10 <sup>6</sup>                            | <10 <sup>6</sup> |
|                        | Licence Revoke                                                                                                                                                                                                                       | 125                                | <10 <sup>6</sup>                         | <10 <sup>6</sup>                          | <10 <sup>6</sup>                         | <10 <sup>6</sup>                                | <10 <sup>6</sup>                                                                               | <10 <sup>6</sup>                            | <10 <sup>6</sup> |
|                        | On Remand                                                                                                                                                                                                                            | 1,059                              | 15 (1.4)                                 | <10 <sup>6</sup>                          | <10 <sup>6</sup>                         | <10 <sup>6</sup>                                | <10 <sup>6</sup>                                                                               | <10 <sup>6</sup>                            | <10 <sup>6</sup> |
|                        | Transfer                                                                                                                                                                                                                             | 518                                | <10 <sup>6</sup>                         | <10 <sup>6</sup>                          | <10 <sup>6</sup>                         | <10 <sup>6</sup>                                | <10 <sup>6</sup>                                                                               | <10 <sup>6</sup>                            | <10 <sup>6</sup> |
|                        | Upgrade in security category                                                                                                                                                                                                         | <10 <sup>6</sup>                   | <10 <sup>6</sup>                         | <10 <sup>6</sup>                          | <10 <sup>6</sup>                         | <10 <sup>6</sup>                                | <10 <sup>6</sup>                                                                               | <10 <sup>6</sup>                            | <10 <sup>6</sup> |
| 2019/20                | .                                                                                                                                                                                                                                    | 69                                 | <10 <sup>6</sup>                         | <10 <sup>6</sup>                          | <10 <sup>6</sup>                         | <10 <sup>6</sup>                                | <10 <sup>6</sup>                                                                               | <10 <sup>6</sup>                            | <10 <sup>6</sup> |
|                        | Abscinded                                                                                                                                                                                                                            | <10 <sup>6</sup>                   | <10 <sup>6</sup>                         | <10 <sup>6</sup>                          | <10 <sup>6</sup>                         | <10 <sup>6</sup>                                | <10 <sup>6</sup>                                                                               | <10 <sup>6</sup>                            | <10 <sup>6</sup> |
|                        | Active In                                                                                                                                                                                                                            | 22,424                             | 433 (1.9)                                | <10 <sup>6</sup>                          | 185 (42.7)                               | <10 <sup>6</sup>                                | 263 (60.7)                                                                                     | 246 (56.8)                                  | 304 (70.2)       |
|                        | Active Out                                                                                                                                                                                                                           | 625                                | <10 <sup>6</sup>                         | <10 <sup>6</sup>                          | <10 <sup>6</sup>                         | <10 <sup>6</sup>                                | <10 <sup>6</sup>                                                                               | <10 <sup>6</sup>                            | <10 <sup>6</sup> |
|                        | Convicted Sentence                                                                                                                                                                                                                   | 1,361                              | 26 (1.9)                                 | <10 <sup>6</sup>                          | <10 <sup>6</sup>                         | <10 <sup>6</sup>                                | 16 (61.5)                                                                                      | 15 (57.7)                                   | 17 (65.4)        |
|                        | Downgrade in security category                                                                                                                                                                                                       | <10 <sup>6</sup>                   | <10 <sup>6</sup>                         | <10 <sup>6</sup>                          | <10 <sup>6</sup>                         | <10 <sup>6</sup>                                | <10 <sup>6</sup>                                                                               | <10 <sup>6</sup>                            | <10 <sup>6</sup> |
|                        | Internal Cell Move                                                                                                                                                                                                                   | <10 <sup>6</sup>                   | <10 <sup>6</sup>                         | <10 <sup>6</sup>                          | <10 <sup>6</sup>                         | <10 <sup>6</sup>                                | <10 <sup>6</sup>                                                                               | <10 <sup>6</sup>                            | <10 <sup>6</sup> |
|                        | Judges Remand                                                                                                                                                                                                                        | 19                                 | <10 <sup>6</sup>                         | <10 <sup>6</sup>                          | <10 <sup>6</sup>                         | <10 <sup>6</sup>                                | <10 <sup>6</sup>                                                                               | <10 <sup>6</sup>                            | <10 <sup>6</sup> |
|                        | Licence Revoke                                                                                                                                                                                                                       | 178                                | <10 <sup>6</sup>                         | <10 <sup>6</sup>                          | <10 <sup>6</sup>                         | <10 <sup>6</sup>                                | <10 <sup>6</sup>                                                                               | <10 <sup>6</sup>                            | <10 <sup>6</sup> |
|                        | On Remand                                                                                                                                                                                                                            | 1,031                              | 16 (1.6)                                 | <10 <sup>6</sup>                          | <10 <sup>6</sup>                         | <10 <sup>6</sup>                                | 13 (81.3)                                                                                      | <10 <sup>6</sup>                            | 13 (81.3)        |
|                        | Transfer                                                                                                                                                                                                                             | 101                                | <10 <sup>6</sup>                         | <10 <sup>6</sup>                          | <10 <sup>6</sup>                         | <10 <sup>6</sup>                                | <10 <sup>6</sup>                                                                               | <10 <sup>6</sup>                            | <10 <sup>6</sup> |
|                        | Upgrade in security category                                                                                                                                                                                                         | <10 <sup>6</sup>                   | <10 <sup>6</sup>                         | <10 <sup>6</sup>                          | <10 <sup>6</sup>                         | <10 <sup>6</sup>                                | <10 <sup>6</sup>                                                                               | <10 <sup>6</sup>                            | <10 <sup>6</sup> |
| <b>Age - years</b>     |                                                                                                                                                                                                                                      |                                    |                                          |                                           |                                          |                                                 |                                                                                                |                                             |                  |
| 2017/18                | 10 - <20                                                                                                                                                                                                                             | 468                                | <10 <sup>6</sup>                         | <10 <sup>6</sup>                          | <10 <sup>6</sup>                         | <10 <sup>6</sup>                                | <10 <sup>6</sup>                                                                               | <10 <sup>6</sup>                            | <10 <sup>6</sup> |
|                        | 20 - <30                                                                                                                                                                                                                             | 6,994                              | <10 <sup>6</sup>                         | <10 <sup>6</sup>                          | <10 <sup>6</sup>                         | <10 <sup>6</sup>                                | <10 <sup>6</sup>                                                                               | <10 <sup>6</sup>                            | <10 <sup>6</sup> |
|                        | 30 - <40                                                                                                                                                                                                                             | 7,051                              | 18 (0.3)                                 | <10 <sup>6</sup>                          | <10 <sup>6</sup>                         | <10 <sup>6</sup>                                | <10 <sup>6</sup>                                                                               | <10 <sup>6</sup>                            | <10 <sup>6</sup> |
|                        | 40 - <50                                                                                                                                                                                                                             | 4,114                              | 54 (1.3)                                 | <10 <sup>6</sup>                          | 13 (24.1)                                | <10 <sup>6</sup>                                | 27 (50.0)                                                                                      | 25 (46.3)                                   | 34 (63.0)        |
|                        | 50 - <60                                                                                                                                                                                                                             | 2,107                              | 123 (5.8)                                | <10 <sup>6</sup>                          | 58 (47.2)                                | <10 <sup>6</sup>                                | 76 (61.8)                                                                                      | 75 (61.0)                                   | 95 (77.2)        |
|                        | 60 - <70                                                                                                                                                                                                                             | 684                                | 96 (14.0)                                | <10 <sup>6</sup>                          | 34 (35.4)                                | <10 <sup>6</sup>                                | 63 (65.6)                                                                                      | 54 (56.3)                                   | 76 (79.2)        |
|                        | 70 - <80                                                                                                                                                                                                                             | 213                                | 41 (19.2)                                | <10 <sup>6</sup>                          | 15 (36.6)                                | <10 <sup>6</sup>                                | 26 (63.4)                                                                                      | 25 (61.0)                                   | 35 (85.4)        |
|                        | 80 - <90                                                                                                                                                                                                                             | 40                                 | <10 <sup>6</sup>                         | <10 <sup>6</sup>                          | <10 <sup>6</sup>                         | <10 <sup>6</sup>                                | <10 <sup>6</sup>                                                                               | <10 <sup>6</sup>                            | <10 <sup>6</sup> |
|                        | 90 - <100                                                                                                                                                                                                                            | <10 <sup>6</sup>                   | <10 <sup>6</sup>                         | <10 <sup>6</sup>                          | <10 <sup>6</sup>                         | <10 <sup>6</sup>                                | <10 <sup>6</sup>                                                                               | <10 <sup>6</sup>                            | <10 <sup>6</sup> |
|                        | 100 - <110                                                                                                                                                                                                                           | <10 <sup>6</sup>                   | <10 <sup>6</sup>                         | <10 <sup>6</sup>                          | <10 <sup>6</sup>                         | <10 <sup>6</sup>                                | <10 <sup>6</sup>                                                                               | <10 <sup>6</sup>                            | <10 <sup>6</sup> |
| 2018/19                | 10 - <20                                                                                                                                                                                                                             | 436                                | <10 <sup>6</sup>                         | <10 <sup>6</sup>                          | <10 <sup>6</sup>                         | <10 <sup>6</sup>                                | <10 <sup>6</sup>                                                                               | <10 <sup>6</sup>                            | <10 <sup>6</sup> |
|                        | 20 - <30                                                                                                                                                                                                                             | 7,163                              | 11 (0.2)                                 | <10 <sup>6</sup>                          | <10 <sup>6</sup>                         | <10 <sup>6</sup>                                | <10 <sup>6</sup>                                                                               | <10 <sup>6</sup>                            | <10 <sup>6</sup> |
|                        | 30 - <40                                                                                                                                                                                                                             | 7,381                              | 38 (0.5)                                 | <10 <sup>6</sup>                          | <10 <sup>6</sup>                         | <10 <sup>6</sup>                                | <10 <sup>6</sup>                                                                               | 11 (28.9)                                   | <10 <sup>6</sup> |
|                        | 40 - <50                                                                                                                                                                                                                             | 4,180                              | 69 (1.7)                                 | <10 <sup>6</sup>                          | 26 (37.7)                                | <10 <sup>6</sup>                                | 36 (52.2)                                                                                      | 35 (50.7)                                   | 39 (56.5)        |
|                        | 50 - <60                                                                                                                                                                                                                             | 1,978                              | 149 (7.5)                                | <10 <sup>6</sup>                          | 66 (44.3)                                | <10 <sup>6</sup>                                | 104 (69.8)                                                                                     | 90 (60.4)                                   | 114 (76.5)       |
|                        | 60 - <70                                                                                                                                                                                                                             | 701                                | 109 (15.5)                               | <10 <sup>6</sup>                          | 53 (48.6)                                | <10 <sup>6</sup>                                | 75 (68.8)                                                                                      | 64 (58.7)                                   | 85 (78.0)        |
|                        | 70 - <80                                                                                                                                                                                                                             | 209                                | 40 (19.1)                                | <10 <sup>6</sup>                          | 18 (45.0)                                | <10 <sup>6</sup>                                | 23 (57.5)                                                                                      | 27 (67.5)                                   | 35 (87.5)        |
|                        | 80 - <90                                                                                                                                                                                                                             | 45                                 | 13 (28.9)                                | <10 <sup>6</sup>                          | <10 <sup>6</sup>                         | <10 <sup>6</sup>                                | <10 <sup>6</sup>                                                                               | <10 <sup>6</sup>                            | 11 (84.6)        |
|                        | 90 - <100                                                                                                                                                                                                                            | <10 <sup>6</sup>                   | <10 <sup>6</sup>                         | <10 <sup>6</sup>                          | <10 <sup>6</sup>                         | <10 <sup>6</sup>                                | <10 <sup>6</sup>                                                                               | <10 <sup>6</sup>                            | <10 <sup>6</sup> |
|                        | 100 - <110                                                                                                                                                                                                                           | <10 <sup>6</sup>                   | <10 <sup>6</sup>                         | <10 <sup>6</sup>                          | <10 <sup>6</sup>                         | <10 <sup>6</sup>                                | <10 <sup>6</sup>                                                                               | <10 <sup>6</sup>                            | <10 <sup>6</sup> |
| 2019/20                | 10 - <20                                                                                                                                                                                                                             | 404                                | <10 <sup>6</sup>                         | <10 <sup>6</sup>                          | <10 <sup>6</sup>                         | <10 <sup>6</sup>                                | <10 <sup>6</sup>                                                                               | <10 <sup>6</sup>                            | <10 <sup>6</sup> |
|                        | 20 - <30                                                                                                                                                                                                                             | 8,064                              | <10 <sup>6</sup>                         | <10 <sup>6</sup>                          | <10 <sup>6</sup>                         | <10 <sup>6</sup>                                | <10 <sup>6</sup>                                                                               | <10 <sup>6</sup>                            | <10 <sup>6</sup> |
|                        | 30 - <40                                                                                                                                                                                                                             | 9,125                              | 37 (0.4)                                 | <10 <sup>6</sup>                          | <10 <sup>6</sup>                         | <10 <sup>6</sup>                                | <10 <sup>6</sup>                                                                               | 12 (32.4)                                   | <10 <sup>6</sup> |
|                        | 40 - <50                                                                                                                                                                                                                             | 4,948                              | 84 (1.7)                                 | <10 <sup>6</sup>                          | 30 (35.7)                                | <10 <sup>6</sup>                                | 40 (47.6)                                                                                      | 41 (48.8)                                   | 52 (61.9)        |
|                        | 50 - <60                                                                                                                                                                                                                             | 2,224                              | 163 (7.3)                                | <10 <sup>6</sup>                          | 74 (45.4)                                | <10 <sup>6</sup>                                | 110 (67.5)                                                                                     | 96 (58.9)                                   | 125 (76.7)       |
|                        | 60 - <70                                                                                                                                                                                                                             | 751                                | 137 (18.2)                               | <10 <sup>6</sup>                          | 66 (48.2)                                | <10 <sup>6</sup>                                | 101 (73.7)                                                                                     | 91 (66.4)                                   | 115 (83.9)       |
|                        | 70 - <80                                                                                                                                                                                                                             | 238                                | 48 (20.2)                                | <10 <sup>6</sup>                          | 22 (45.8)                                | <10 <sup>6</sup>                                | 31 (64.6)                                                                                      | 29 (60.4)                                   | 35 (72.9)        |
|                        | 80 - <90                                                                                                                                                                                                                             | 53                                 | 13 (24.5)                                | <10 <sup>6</sup>                          | <10 <sup>6</sup>                         | <10 <sup>6</sup>                                | <10 <sup>6</sup>                                                                               | <10 <sup>6</sup>                            | <10 <sup>6</sup> |
|                        | 90 - <100                                                                                                                                                                                                                            | <10 <sup>6</sup>                   | <10 <sup>6</sup>                         | <10 <sup>6</sup>                          | <10 <sup>6</sup>                         | <10 <sup>6</sup>                                | <10 <sup>6</sup>                                                                               | <10 <sup>6</sup>                            | <10 <sup>6</sup> |
|                        | 100 - <110                                                                                                                                                                                                                           | <10 <sup>6</sup>                   | <10 <sup>6</sup>                         | <10 <sup>6</sup>                          | <10 <sup>6</sup>                         | <10 <sup>6</sup>                                | <10 <sup>6</sup>                                                                               | <10 <sup>6</sup>                            | <10 <sup>6</sup> |

<sup>1</sup>Eligible for indicator; <sup>2</sup>Achieve in current prison; <sup>3</sup>Achieve in previous prison; <sup>4</sup>Overall achievement - either current or previous prison; <sup>5</sup>Declined indicator; <sup>6</sup>Suppressed (<10) to avoid disclosure

| Indicator                      | The proportion of people who have had a myocardial infarction and are have received a prescription for an ACE-inhibitor or angiotensin receptor blocker, anti-platelet therapy, beta-blocker and a statin in the preceding 12 months |                                    |                                          |                                           |                                          |                                                    | no comparable data in QOF 2019/20 data. Latest was QOF 2014/15 in which achievement was 70.57% |                                             |                  |
|--------------------------------|--------------------------------------------------------------------------------------------------------------------------------------------------------------------------------------------------------------------------------------|------------------------------------|------------------------------------------|-------------------------------------------|------------------------------------------|----------------------------------------------------|------------------------------------------------------------------------------------------------|---------------------------------------------|------------------|
| Group: Cardiovascular Disease  |                                                                                                                                                                                                                                      |                                    |                                          |                                           |                                          |                                                    |                                                                                                |                                             |                  |
| Variable                       | Population                                                                                                                                                                                                                           | Eligible <sup>1</sup><br>(% popln) | Satisfy All <sup>2</sup><br>(% eligible) | Satisfy ACEI <sup>2</sup><br>(% eligible) | Satisfy ARB <sup>2</sup><br>(% eligible) | Satisfy Anti Platelet <sup>2</sup> (%<br>eligible) | Satisfy Beta Blocker <sup>2</sup> (%<br>eligible)                                              | Satisfy Statin <sup>2</sup><br>(% eligible) |                  |
| <b>Length of Stay (months)</b> |                                                                                                                                                                                                                                      |                                    |                                          |                                           |                                          |                                                    |                                                                                                |                                             |                  |
| 2017/18                        | <1                                                                                                                                                                                                                                   | 4,474                              | 37 (0.8)                                 | <10 <sup>6</sup>                          | <10 <sup>6</sup>                         | <10 <sup>6</sup>                                   | 14 (37.8)                                                                                      | 12 (32.4)                                   | 18 (48.6)        |
|                                | 1-<6                                                                                                                                                                                                                                 | 8,075                              | 78 (1.0)                                 | <10 <sup>6</sup>                          | 30 (38.5)                                | <10 <sup>6</sup>                                   | 43 (55.1)                                                                                      | 51 (65.4)                                   | 55 (70.5)        |
|                                | 6-<12                                                                                                                                                                                                                                | 3,672                              | 54 (1.5)                                 | <10 <sup>6</sup>                          | 22 (40.7)                                | <10 <sup>6</sup>                                   | 35 (64.8)                                                                                      | 37 (68.5)                                   | 43 (79.6)        |
|                                | 12-<24                                                                                                                                                                                                                               | 2,832                              | 50 (1.8)                                 | <10 <sup>6</sup>                          | 16 (32.0)                                | <10 <sup>6</sup>                                   | 20 (40.0)                                                                                      | 26 (52.0)                                   | 36 (72.0)        |
|                                | 24+                                                                                                                                                                                                                                  | 2,624                              | 124 (4.7)                                | <10 <sup>6</sup>                          | 53 (42.7)                                | <10 <sup>6</sup>                                   | 90 (72.6)                                                                                      | 66 (53.2)                                   | 102 (82.3)       |
| 2018/19                        | <1                                                                                                                                                                                                                                   | 4,801                              | 60 (1.2)                                 | <10 <sup>6</sup>                          | 15 (25.0)                                | <10 <sup>6</sup>                                   | 23 (38.3)                                                                                      | 29 (48.3)                                   | 29 (48.3)        |
|                                | 1-<6                                                                                                                                                                                                                                 | 7,742                              | 107 (1.4)                                | <10 <sup>6</sup>                          | 40 (37.4)                                | <10 <sup>6</sup>                                   | 64 (59.8)                                                                                      | 58 (54.2)                                   | 65 (60.7)        |
|                                | 6-<12                                                                                                                                                                                                                                | 3,616                              | 60 (1.7)                                 | <10 <sup>6</sup>                          | 20 (33.3)                                | <10 <sup>6</sup>                                   | 34 (56.7)                                                                                      | 33 (55.0)                                   | 38 (63.3)        |
|                                | 12-<24                                                                                                                                                                                                                               | 3,447                              | 68 (2.0)                                 | <10 <sup>6</sup>                          | 32 (47.1)                                | <10 <sup>6</sup>                                   | 38 (55.9)                                                                                      | 43 (63.2)                                   | 46 (67.6)        |
|                                | 24+                                                                                                                                                                                                                                  | 2,493                              | 134 (5.4)                                | <10 <sup>6</sup>                          | 65 (48.5)                                | <10 <sup>6</sup>                                   | 95 (70.9)                                                                                      | 77 (57.5)                                   | 114 (85.1)       |
| 2019/20                        | <1                                                                                                                                                                                                                                   | 5,745                              | 69 (1.2)                                 | <10 <sup>6</sup>                          | 20 (29.0)                                | <10 <sup>6</sup>                                   | 33 (47.8)                                                                                      | 30 (43.5)                                   | 40 (58.0)        |
|                                | 1-<6                                                                                                                                                                                                                                 | 9,697                              | 117 (1.2)                                | <10 <sup>6</sup>                          | 49 (41.9)                                | <10 <sup>6</sup>                                   | 66 (56.4)                                                                                      | 66 (56.4)                                   | 72 (61.5)        |
|                                | 6-<12                                                                                                                                                                                                                                | 5,090                              | 97 (1.9)                                 | <10 <sup>6</sup>                          | 36 (37.1)                                | <10 <sup>6</sup>                                   | 56 (57.7)                                                                                      | 54 (55.7)                                   | 70 (72.2)        |
|                                | 12-<24                                                                                                                                                                                                                               | 3,244                              | 83 (2.6)                                 | <10 <sup>6</sup>                          | 42 (50.6)                                | <10 <sup>6</sup>                                   | 54 (65.1)                                                                                      | 49 (59.0)                                   | 57 (68.7)        |
|                                | 24+                                                                                                                                                                                                                                  | 2,035                              | 126 (6.2)                                | <10 <sup>6</sup>                          | 60 (47.6)                                | <10 <sup>6</sup>                                   | 91 (72.2)                                                                                      | 81 (64.3)                                   | 107 (84.9)       |
| <b>Ethnic Group</b>            |                                                                                                                                                                                                                                      |                                    |                                          |                                           |                                          |                                                    |                                                                                                |                                             |                  |
| 2017/18                        | White                                                                                                                                                                                                                                | 15,638                             | 290 (1.9)                                | <10 <sup>6</sup>                          | 104 (35.9)                               | <10 <sup>6</sup>                                   | 174 (60.0)                                                                                     | 161 (55.5)                                  | 213 (73.4)       |
|                                | Mixed                                                                                                                                                                                                                                | 431                                | <10 <sup>6</sup>                         | <10 <sup>6</sup>                          | <10 <sup>6</sup>                         | <10 <sup>6</sup>                                   | <10 <sup>6</sup>                                                                               | <10 <sup>6</sup>                            | <10 <sup>6</sup> |
|                                | Asian or Asian British                                                                                                                                                                                                               | 813                                | <10 <sup>6</sup>                         | <10 <sup>6</sup>                          | <10 <sup>6</sup>                         | <10 <sup>6</sup>                                   | <10 <sup>6</sup>                                                                               | <10 <sup>6</sup>                            | <10 <sup>6</sup> |
|                                | Black or Black British                                                                                                                                                                                                               | 404                                | <10 <sup>6</sup>                         | <10 <sup>6</sup>                          | <10 <sup>6</sup>                         | <10 <sup>6</sup>                                   | <10 <sup>6</sup>                                                                               | <10 <sup>6</sup>                            | <10 <sup>6</sup> |
|                                | Chinese and Other                                                                                                                                                                                                                    | 214                                | <10 <sup>6</sup>                         | <10 <sup>6</sup>                          | <10 <sup>6</sup>                         | <10 <sup>6</sup>                                   | <10 <sup>6</sup>                                                                               | <10 <sup>6</sup>                            | <10 <sup>6</sup> |
|                                | Unclassified                                                                                                                                                                                                                         | 372                                | 12 (3.2)                                 | <10 <sup>6</sup>                          | <10 <sup>6</sup>                         | <10 <sup>6</sup>                                   | <10 <sup>6</sup>                                                                               | <10 <sup>6</sup>                            | <10 <sup>6</sup> |
| 2018/19                        | White                                                                                                                                                                                                                                | 14,911                             | 341 (2.3)                                | <10 <sup>6</sup>                          | 137 (40.2)                               | <10 <sup>6</sup>                                   | 207 (60.7)                                                                                     | 187 (54.8)                                  | 233 (68.3)       |
|                                | Mixed                                                                                                                                                                                                                                | 371                                | <10 <sup>6</sup>                         | <10 <sup>6</sup>                          | <10 <sup>6</sup>                         | <10 <sup>6</sup>                                   | <10 <sup>6</sup>                                                                               | <10 <sup>6</sup>                            | <10 <sup>6</sup> |
|                                | Asian or Asian British                                                                                                                                                                                                               | 726                                | 13 (1.8)                                 | <10 <sup>6</sup>                          | <10 <sup>6</sup>                         | <10 <sup>6</sup>                                   | <10 <sup>6</sup>                                                                               | <10 <sup>6</sup>                            | <10 <sup>6</sup> |
|                                | Black or Black British                                                                                                                                                                                                               | 364                                | <10 <sup>6</sup>                         | <10 <sup>6</sup>                          | <10 <sup>6</sup>                         | <10 <sup>6</sup>                                   | <10 <sup>6</sup>                                                                               | <10 <sup>6</sup>                            | <10 <sup>6</sup> |
|                                | Chinese and Other                                                                                                                                                                                                                    | 167                                | <10 <sup>6</sup>                         | <10 <sup>6</sup>                          | <10 <sup>6</sup>                         | <10 <sup>6</sup>                                   | <10 <sup>6</sup>                                                                               | <10 <sup>6</sup>                            | <10 <sup>6</sup> |
|                                | Unclassified                                                                                                                                                                                                                         | 409                                | <10 <sup>6</sup>                         | <10 <sup>6</sup>                          | <10 <sup>6</sup>                         | <10 <sup>6</sup>                                   | <10 <sup>6</sup>                                                                               | <10 <sup>6</sup>                            | <10 <sup>6</sup> |
| 2019/20                        | White                                                                                                                                                                                                                                | 16,606                             | 376 (2.3)                                | <10 <sup>6</sup>                          | 159 (42.3)                               | <10 <sup>6</sup>                                   | 235 (62.5)                                                                                     | 211 (56.1)                                  | 263 (69.9)       |
|                                | Mixed                                                                                                                                                                                                                                | 409                                | <10 <sup>6</sup>                         | <10 <sup>6</sup>                          | <10 <sup>6</sup>                         | <10 <sup>6</sup>                                   | <10 <sup>6</sup>                                                                               | <10 <sup>6</sup>                            | <10 <sup>6</sup> |
|                                | Asian or Asian British                                                                                                                                                                                                               | 755                                | 21 (2.8)                                 | <10 <sup>6</sup>                          | <10 <sup>6</sup>                         | <10 <sup>6</sup>                                   | 12 (57.1)                                                                                      | 11 (52.4)                                   | 16 (76.2)        |
|                                | Black or Black British                                                                                                                                                                                                               | 451                                | <10 <sup>6</sup>                         | <10 <sup>6</sup>                          | <10 <sup>6</sup>                         | <10 <sup>6</sup>                                   | <10 <sup>6</sup>                                                                               | <10 <sup>6</sup>                            | <10 <sup>6</sup> |
|                                | Chinese and Other                                                                                                                                                                                                                    | 163                                | <10 <sup>6</sup>                         | <10 <sup>6</sup>                          | <10 <sup>6</sup>                         | <10 <sup>6</sup>                                   | <10 <sup>6</sup>                                                                               | <10 <sup>6</sup>                            | <10 <sup>6</sup> |
|                                | Unclassified                                                                                                                                                                                                                         | 387                                | <10 <sup>6</sup>                         | <10 <sup>6</sup>                          | <10 <sup>6</sup>                         | <10 <sup>6</sup>                                   | <10 <sup>6</sup>                                                                               | <10 <sup>6</sup>                            | <10 <sup>6</sup> |

<sup>1</sup>Eligible for indicator; <sup>2</sup>Achieve in current prison; <sup>3</sup>Achieve in previous prison; <sup>4</sup>Overall achievement - either current or previous prison; <sup>5</sup>Declined indicator; <sup>6</sup>Suppressed (<10) to avoid disclosure

| Indicator              | The proportion of people who have had a myocardial infarction and are have received a prescription for an ACE-inhibitor or angiotensin receptor blocker, anti-platelet therapy, beta-blocker and a statin in the preceding 12 months |          |                  | Community achievement 2019/20 (%): no comparable data in QOF 2019/20 data. Latest was QOF 2014/15 in which achievement was 70.57% |                                      |
|------------------------|--------------------------------------------------------------------------------------------------------------------------------------------------------------------------------------------------------------------------------------|----------|------------------|-----------------------------------------------------------------------------------------------------------------------------------|--------------------------------------|
|                        | Group: Cardiovascular Disease                                                                                                                                                                                                        | Variable | Population       |                                                                                                                                   | Eligible <sup>1</sup> (% population) |
| <b>Year</b>            |                                                                                                                                                                                                                                      |          |                  |                                                                                                                                   |                                      |
|                        | 2017/18                                                                                                                                                                                                                              | 21,677   | 343 (1.6)        |                                                                                                                                   | 175 (51.0)                           |
|                        | 2018/19                                                                                                                                                                                                                              | 22,099   | 429 (1.9)        |                                                                                                                                   | 223 (52.0)                           |
|                        | 2019/20                                                                                                                                                                                                                              | 25,811   | 492 (1.9)        |                                                                                                                                   | 256 (52.0)                           |
| <b>Prison</b>          |                                                                                                                                                                                                                                      |          |                  |                                                                                                                                   |                                      |
| 2017/18                | Prison 1                                                                                                                                                                                                                             | 1,323    | <10 <sup>6</sup> |                                                                                                                                   | <10 <sup>6</sup>                     |
|                        | Prison 2                                                                                                                                                                                                                             | 3,261    | 47 (1.4)         |                                                                                                                                   | 20 (42.6)                            |
|                        | Prison 3                                                                                                                                                                                                                             | 2,623    | 35 (1.3)         |                                                                                                                                   | 16 (45.7)                            |
|                        | Prison 4                                                                                                                                                                                                                             | 2,089    | 42 (2.0)         |                                                                                                                                   | 25 (59.5)                            |
|                        | Prison 5                                                                                                                                                                                                                             | 637      | <10 <sup>6</sup> |                                                                                                                                   | <10 <sup>6</sup>                     |
|                        | Prison 6                                                                                                                                                                                                                             | 1,552    | 33 (2.1)         |                                                                                                                                   | 12 (36.4)                            |
|                        | Prison 7                                                                                                                                                                                                                             | 635      | <10 <sup>6</sup> |                                                                                                                                   | <10 <sup>6</sup>                     |
|                        | Prison 8                                                                                                                                                                                                                             | 1,085    | 12 (1.1)         |                                                                                                                                   | <10 <sup>6</sup>                     |
|                        | Prison 9                                                                                                                                                                                                                             | 981      | 52 (5.3)         |                                                                                                                                   | 32 (61.5)                            |
|                        | Prison 10                                                                                                                                                                                                                            | 2,523    | 16 (0.6)         |                                                                                                                                   | 11 (68.8)                            |
|                        | Prison 11                                                                                                                                                                                                                            | 3,470    | 50 (1.4)         |                                                                                                                                   | 22 (44.0)                            |
|                        | Prison 12                                                                                                                                                                                                                            | 815      | <10 <sup>6</sup> |                                                                                                                                   | <10 <sup>6</sup>                     |
|                        | Prison 13                                                                                                                                                                                                                            | 683      | 34 (5.0)         |                                                                                                                                   | 21 (61.8)                            |
| 2018/19                | Prison 1                                                                                                                                                                                                                             | 1,333    | 10 (0.8)         |                                                                                                                                   | <10 <sup>6</sup>                     |
|                        | Prison 2                                                                                                                                                                                                                             | 2,705    | 42 (1.6)         |                                                                                                                                   | 25 (59.5)                            |
|                        | Prison 3                                                                                                                                                                                                                             | 2,522    | 32 (1.3)         |                                                                                                                                   | 17 (53.1)                            |
|                        | Prison 4                                                                                                                                                                                                                             | 2,349    | 57 (2.4)         |                                                                                                                                   | 31 (54.4)                            |
|                        | Prison 5                                                                                                                                                                                                                             | 676      | 14 (2.1)         |                                                                                                                                   | <10 <sup>6</sup>                     |
|                        | Prison 6                                                                                                                                                                                                                             | 1,513    | 32 (2.1)         |                                                                                                                                   | 15 (46.9)                            |
|                        | Prison 7                                                                                                                                                                                                                             | 654      | <10 <sup>6</sup> |                                                                                                                                   | <10 <sup>6</sup>                     |
|                        | Prison 8                                                                                                                                                                                                                             | 1,148    | 23 (2.0)         |                                                                                                                                   | <10 <sup>6</sup>                     |
|                        | Prison 9                                                                                                                                                                                                                             | 996      | 54 (5.4)         |                                                                                                                                   | 36 (66.7)                            |
|                        | Prison 10                                                                                                                                                                                                                            | 2,717    | 55 (2.0)         |                                                                                                                                   | 24 (43.6)                            |
|                        | Prison 11                                                                                                                                                                                                                            | 4,020    | 65 (1.6)         |                                                                                                                                   | 28 (43.1)                            |
|                        | Prison 12                                                                                                                                                                                                                            | 792      | <10 <sup>6</sup> |                                                                                                                                   | <10 <sup>6</sup>                     |
|                        | Prison 13                                                                                                                                                                                                                            | 674      | 37 (5.5)         |                                                                                                                                   | 24 (64.9)                            |
| 2019/20                | Prison 1                                                                                                                                                                                                                             | 1,410    | 22 (1.6)         |                                                                                                                                   | <10 <sup>6</sup>                     |
|                        | Prison 2                                                                                                                                                                                                                             | 2,979    | 48 (1.6)         |                                                                                                                                   | 34 (70.8)                            |
|                        | Prison 3                                                                                                                                                                                                                             | 2,809    | 40 (1.4)         |                                                                                                                                   | 18 (45.0)                            |
|                        | Prison 4                                                                                                                                                                                                                             | 2,651    | 80 (3.0)         |                                                                                                                                   | 55 (68.8)                            |
|                        | Prison 5                                                                                                                                                                                                                             | 616      | 10 (1.6)         |                                                                                                                                   | <10 <sup>6</sup>                     |
|                        | Prison 6                                                                                                                                                                                                                             | 1,533    | 29 (1.9)         |                                                                                                                                   | 14 (48.3)                            |
|                        | Prison 7                                                                                                                                                                                                                             | 860      | 12 (1.4)         |                                                                                                                                   | <10 <sup>6</sup>                     |
|                        | Prison 8                                                                                                                                                                                                                             | 1,385    | 20 (1.4)         |                                                                                                                                   | <10 <sup>6</sup>                     |
|                        | Prison 9                                                                                                                                                                                                                             | 1,092    | 65 (6.0)         |                                                                                                                                   | 38 (58.5)                            |
|                        | Prison 10                                                                                                                                                                                                                            | 3,577    | 58 (1.6)         |                                                                                                                                   | 24 (41.4)                            |
|                        | Prison 11                                                                                                                                                                                                                            | 5,348    | 71 (1.3)         |                                                                                                                                   | 34 (47.9)                            |
|                        | Prison 12                                                                                                                                                                                                                            | 805      | <10 <sup>6</sup> |                                                                                                                                   | <10 <sup>6</sup>                     |
|                        | Prison 13                                                                                                                                                                                                                            | 746      | 37 (5.0)         |                                                                                                                                   | 20 (54.1)                            |
| <b>Prison category</b> |                                                                                                                                                                                                                                      |          |                  |                                                                                                                                   |                                      |
| 2017/18                | A                                                                                                                                                                                                                                    | 1,664    | 86 (5.2)         |                                                                                                                                   | 53 (61.6)                            |
|                        | B                                                                                                                                                                                                                                    | 9,254    | 113 (1.2)        |                                                                                                                                   | 53 (46.9)                            |
|                        | C                                                                                                                                                                                                                                    | 6,035    | 85 (1.4)         |                                                                                                                                   | 45 (52.9)                            |
|                        | Closed                                                                                                                                                                                                                               | 1,720    | 18 (1.0)         |                                                                                                                                   | <10 <sup>6</sup>                     |
|                        | D                                                                                                                                                                                                                                    | 2,189    | 41 (1.9)         |                                                                                                                                   | 17 (41.5)                            |
|                        | YOI                                                                                                                                                                                                                                  | 815      | <10 <sup>6</sup> |                                                                                                                                   | <10 <sup>6</sup>                     |
| 2018/19                | A                                                                                                                                                                                                                                    | 1,670    | <10 <sup>6</sup> |                                                                                                                                   | 60 (65.9)                            |
|                        | B                                                                                                                                                                                                                                    | 9,442    | 162 (1.7)        |                                                                                                                                   | 77 (47.5)                            |
|                        | C                                                                                                                                                                                                                                    | 6,204    | 99 (1.6)         |                                                                                                                                   | 53 (53.5)                            |
|                        | Closed                                                                                                                                                                                                                               | 1,802    | 29 (1.6)         |                                                                                                                                   | 11 (37.9)                            |
|                        | D                                                                                                                                                                                                                                    | 2,189    | 46 (2.1)         |                                                                                                                                   | 22 (47.8)                            |
|                        | YOI                                                                                                                                                                                                                                  | 792      | <10 <sup>6</sup> |                                                                                                                                   | <10 <sup>6</sup>                     |
| 2019/20                | A                                                                                                                                                                                                                                    | 1,838    | 102 (5.5)        |                                                                                                                                   | 58 (56.9)                            |
|                        | B                                                                                                                                                                                                                                    | 11,904   | 177 (1.5)        |                                                                                                                                   | 92 (52.0)                            |
|                        | C                                                                                                                                                                                                                                    | 6,870    | 142 (2.1)        |                                                                                                                                   | 79 (55.6)                            |
|                        | Closed                                                                                                                                                                                                                               | 2,245    | 32 (1.4)         |                                                                                                                                   | <10 <sup>6</sup>                     |
|                        | D                                                                                                                                                                                                                                    | 2,149    | 39 (1.8)         |                                                                                                                                   | 18 (46.2)                            |
|                        | YOI                                                                                                                                                                                                                                  | 805      | <10 <sup>6</sup> |                                                                                                                                   | <10 <sup>6</sup>                     |
| <b>Gender</b>          |                                                                                                                                                                                                                                      |          |                  |                                                                                                                                   |                                      |
| 2017/18                | F                                                                                                                                                                                                                                    | 1,699    | 18 (1.1)         |                                                                                                                                   | <10 <sup>6</sup>                     |
|                        | M                                                                                                                                                                                                                                    | 19,977   | 325 (1.6)        |                                                                                                                                   | 168 (51.7)                           |
| 2018/19                | F                                                                                                                                                                                                                                    | 1,802    | 28 (1.6)         |                                                                                                                                   | 10 (35.7)                            |
|                        | M                                                                                                                                                                                                                                    | 20,295   | 401 (2.0)        |                                                                                                                                   | 213 (53.1)                           |
| 2019/20                | F                                                                                                                                                                                                                                    | 1,376    | 20 (1.5)         |                                                                                                                                   | <10 <sup>6</sup>                     |
|                        | M                                                                                                                                                                                                                                    | 23,570   | 460 (2.0)        |                                                                                                                                   | 247 (53.7)                           |

<sup>1</sup>Eligible for indicator; <sup>2</sup>Achieve in current prison; <sup>3</sup>Achieve in previous prison; <sup>4</sup>Overall achievement - either current or previous prison; <sup>5</sup>Declined indicator; <sup>6</sup>Suppressed (<10) to avoid disclosure

| Indicator              | The proportion of people who have had a myocardial infarction and are have received a prescription for an ACE-inhibitor or angiotensin receptor blocker, anti-platelet therapy, beta-blocker and a statin in the preceding 12 months |                  |                                      | Community achievement 2019/20 (%): no comparable data in QOF 2019/20 data. Latest was QOF 2014/15 in which achievement was 70.57% |
|------------------------|--------------------------------------------------------------------------------------------------------------------------------------------------------------------------------------------------------------------------------------|------------------|--------------------------------------|-----------------------------------------------------------------------------------------------------------------------------------|
|                        | Group: Cardiovascular Disease                                                                                                                                                                                                        | Population       | Eligible <sup>1</sup> (% population) |                                                                                                                                   |
| <b>Sentence Status</b> |                                                                                                                                                                                                                                      |                  |                                      |                                                                                                                                   |
| 2017/18                | .                                                                                                                                                                                                                                    | 81               | <10 <sup>0</sup>                     | <10 <sup>0</sup>                                                                                                                  |
|                        | Absconded                                                                                                                                                                                                                            | <10 <sup>0</sup> | <10 <sup>0</sup>                     | <10 <sup>0</sup>                                                                                                                  |
|                        | Active In                                                                                                                                                                                                                            | 15,872           | 267 (1.7)                            | 143 (53.6)                                                                                                                        |
|                        | Active Out                                                                                                                                                                                                                           | 1,052            | 13 (1.2)                             | <10 <sup>0</sup>                                                                                                                  |
|                        | Convicted Sentence                                                                                                                                                                                                                   | 2,125            | 27 (1.3)                             | 14 (51.9)                                                                                                                         |
|                        | Downgrade in security category                                                                                                                                                                                                       | <10 <sup>0</sup> | <10 <sup>0</sup>                     | <10 <sup>0</sup>                                                                                                                  |
|                        | Internal Cell Move                                                                                                                                                                                                                   | <10 <sup>0</sup> | <10 <sup>0</sup>                     | <10 <sup>0</sup>                                                                                                                  |
|                        | Judges Remand                                                                                                                                                                                                                        | 92               | <10 <sup>0</sup>                     | <10 <sup>0</sup>                                                                                                                  |
|                        | Licence Revoke                                                                                                                                                                                                                       | 52               | <10 <sup>0</sup>                     | <10 <sup>0</sup>                                                                                                                  |
|                        | On Remand                                                                                                                                                                                                                            | 1,492            | 17 (1.1)                             | <10 <sup>0</sup>                                                                                                                  |
|                        | Transfer                                                                                                                                                                                                                             | 910              | 16 (1.8)                             | <10 <sup>0</sup>                                                                                                                  |
|                        | Upgrade in security category                                                                                                                                                                                                         | <10 <sup>0</sup> | <10 <sup>0</sup>                     | <10 <sup>0</sup>                                                                                                                  |
| 2018/19                | .                                                                                                                                                                                                                                    | 88               | <10 <sup>0</sup>                     | <10 <sup>0</sup>                                                                                                                  |
|                        | Absconded                                                                                                                                                                                                                            | <10 <sup>0</sup> | <10 <sup>0</sup>                     | <10 <sup>0</sup>                                                                                                                  |
|                        | Active In                                                                                                                                                                                                                            | 18,145           | 363 (2.0)                            | 192 (52.9)                                                                                                                        |
|                        | Active Out                                                                                                                                                                                                                           | 835              | 18 (2.2)                             | <10 <sup>0</sup>                                                                                                                  |
|                        | Convicted Sentence                                                                                                                                                                                                                   | 1,320            | 21 (1.6)                             | 12 (57.1)                                                                                                                         |
|                        | Downgrade in security category                                                                                                                                                                                                       | <10 <sup>0</sup> | <10 <sup>0</sup>                     | <10 <sup>0</sup>                                                                                                                  |
|                        | Internal Cell Move                                                                                                                                                                                                                   | <10 <sup>0</sup> | <10 <sup>0</sup>                     | <10 <sup>0</sup>                                                                                                                  |
|                        | Judges Remand                                                                                                                                                                                                                        | <10 <sup>0</sup> | <10 <sup>0</sup>                     | <10 <sup>0</sup>                                                                                                                  |
|                        | Licence Revoke                                                                                                                                                                                                                       | 125              | <10 <sup>0</sup>                     | <10 <sup>0</sup>                                                                                                                  |
|                        | On Remand                                                                                                                                                                                                                            | 1,059            | 15 (1.4)                             | <10 <sup>0</sup>                                                                                                                  |
|                        | Transfer                                                                                                                                                                                                                             | 518              | <10 <sup>0</sup>                     | <10 <sup>0</sup>                                                                                                                  |
|                        | Upgrade in security category                                                                                                                                                                                                         | <10 <sup>0</sup> | <10 <sup>0</sup>                     | <10 <sup>0</sup>                                                                                                                  |
| 2019/20                | .                                                                                                                                                                                                                                    | 69               | <10 <sup>0</sup>                     | <10 <sup>0</sup>                                                                                                                  |
|                        | Absconded                                                                                                                                                                                                                            | <10 <sup>0</sup> | <10 <sup>0</sup>                     | <10 <sup>0</sup>                                                                                                                  |
|                        | Active In                                                                                                                                                                                                                            | 22,424           | 433 (1.9)                            | 223 (51.5)                                                                                                                        |
|                        | Active Out                                                                                                                                                                                                                           | 625              | <10 <sup>0</sup>                     | <10 <sup>0</sup>                                                                                                                  |
|                        | Convicted Sentence                                                                                                                                                                                                                   | 1,361            | 26 (1.9)                             | 15 (57.7)                                                                                                                         |
|                        | Downgrade in security category                                                                                                                                                                                                       | <10 <sup>0</sup> | <10 <sup>0</sup>                     | <10 <sup>0</sup>                                                                                                                  |
|                        | Internal Cell Move                                                                                                                                                                                                                   | <10 <sup>0</sup> | <10 <sup>0</sup>                     | <10 <sup>0</sup>                                                                                                                  |
|                        | Judges Remand                                                                                                                                                                                                                        | 19               | <10 <sup>0</sup>                     | <10 <sup>0</sup>                                                                                                                  |
|                        | Licence Revoke                                                                                                                                                                                                                       | 178              | <10 <sup>0</sup>                     | <10 <sup>0</sup>                                                                                                                  |
|                        | On Remand                                                                                                                                                                                                                            | 1,031            | 16 (1.6)                             | <10 <sup>0</sup>                                                                                                                  |
|                        | Transfer                                                                                                                                                                                                                             | 101              | <10 <sup>0</sup>                     | <10 <sup>0</sup>                                                                                                                  |
|                        | Upgrade in security category                                                                                                                                                                                                         | <10 <sup>0</sup> | <10 <sup>0</sup>                     | <10 <sup>0</sup>                                                                                                                  |
| <b>Age - years</b>     |                                                                                                                                                                                                                                      |                  |                                      |                                                                                                                                   |
| 2017/18                | 10 - <20                                                                                                                                                                                                                             | 468              | <10 <sup>0</sup>                     | <10 <sup>0</sup>                                                                                                                  |
|                        | 20 - <30                                                                                                                                                                                                                             | 6,994            | <10 <sup>0</sup>                     | <10 <sup>0</sup>                                                                                                                  |
|                        | 30 - <40                                                                                                                                                                                                                             | 7,051            | 18 (0.3)                             | <10 <sup>0</sup>                                                                                                                  |
|                        | 40 - <50                                                                                                                                                                                                                             | 4,114            | 54 (1.3)                             | 22 (40.7)                                                                                                                         |
|                        | 50 - <60                                                                                                                                                                                                                             | 2,107            | 123 (5.8)                            | 71 (57.7)                                                                                                                         |
|                        | 60 - <70                                                                                                                                                                                                                             | 684              | 96 (14.0)                            | 52 (54.2)                                                                                                                         |
|                        | 70 - <80                                                                                                                                                                                                                             | 213              | 41 (19.2)                            | 20 (48.8)                                                                                                                         |
|                        | 80 - <90                                                                                                                                                                                                                             | 40               | <10 <sup>0</sup>                     | <10 <sup>0</sup>                                                                                                                  |
|                        | 90 - <100                                                                                                                                                                                                                            | <10 <sup>0</sup> | <10 <sup>0</sup>                     | <10 <sup>0</sup>                                                                                                                  |
|                        | 100 - <110                                                                                                                                                                                                                           | <10 <sup>0</sup> | <10 <sup>0</sup>                     | <10 <sup>0</sup>                                                                                                                  |
| 2018/19                | 10 - <20                                                                                                                                                                                                                             | 436              | <10 <sup>0</sup>                     | <10 <sup>0</sup>                                                                                                                  |
|                        | 20 - <30                                                                                                                                                                                                                             | 7,163            | 11 (0.2)                             | <10 <sup>0</sup>                                                                                                                  |
|                        | 30 - <40                                                                                                                                                                                                                             | 7,381            | 38 (0.5)                             | <10 <sup>0</sup>                                                                                                                  |
|                        | 40 - <50                                                                                                                                                                                                                             | 4,180            | 69 (1.7)                             | 30 (43.5)                                                                                                                         |
|                        | 50 - <60                                                                                                                                                                                                                             | 1,978            | 149 (7.5)                            | 90 (60.4)                                                                                                                         |
|                        | 60 - <70                                                                                                                                                                                                                             | 701              | 109 (15.5)                           | 69 (63.3)                                                                                                                         |
|                        | 70 - <80                                                                                                                                                                                                                             | 209              | 40 (19.1)                            | 22 (55.0)                                                                                                                         |
|                        | 80 - <90                                                                                                                                                                                                                             | 45               | 13 (28.9)                            | <10 <sup>0</sup>                                                                                                                  |
|                        | 90 - <100                                                                                                                                                                                                                            | <10 <sup>0</sup> | <10 <sup>0</sup>                     | <10 <sup>0</sup>                                                                                                                  |
|                        | 100 - <110                                                                                                                                                                                                                           | <10 <sup>0</sup> | <10 <sup>0</sup>                     | <10 <sup>0</sup>                                                                                                                  |
| 2019/20                | 10 - <20                                                                                                                                                                                                                             | 404              | <10 <sup>0</sup>                     | <10 <sup>0</sup>                                                                                                                  |
|                        | 20 - <30                                                                                                                                                                                                                             | 8,064            | <10 <sup>0</sup>                     | <10 <sup>0</sup>                                                                                                                  |
|                        | 30 - <40                                                                                                                                                                                                                             | 9,125            | 37 (0.4)                             | <10 <sup>0</sup>                                                                                                                  |
|                        | 40 - <50                                                                                                                                                                                                                             | 4,948            | 84 (1.7)                             | 37 (44.0)                                                                                                                         |
|                        | 50 - <60                                                                                                                                                                                                                             | 2,224            | 163 (7.3)                            | 92 (56.4)                                                                                                                         |
|                        | 60 - <70                                                                                                                                                                                                                             | 751              | 137 (18.2)                           | 88 (64.2)                                                                                                                         |
|                        | 70 - <80                                                                                                                                                                                                                             | 238              | 48 (20.2)                            | 25 (52.1)                                                                                                                         |
|                        | 80 - <90                                                                                                                                                                                                                             | 53               | 13 (24.5)                            | <10 <sup>0</sup>                                                                                                                  |
|                        | 90 - <100                                                                                                                                                                                                                            | <10 <sup>0</sup> | <10 <sup>0</sup>                     | <10 <sup>0</sup>                                                                                                                  |
|                        | 100 - <110                                                                                                                                                                                                                           | <10 <sup>0</sup> | <10 <sup>0</sup>                     | <10 <sup>0</sup>                                                                                                                  |

<sup>1</sup>Eligible for indicator; <sup>2</sup>Achieve in current prison; <sup>3</sup>Achieve in previous prison; <sup>4</sup>Overall achievement - either current or previous prison; <sup>5</sup>Declined indicator; <sup>6</sup>Suppressed (<10) to avoid disclosure

| Indicator                      | The proportion of people who have had a myocardial infarction and are have received a prescription for an ACE-inhibitor or angiotensin receptor blocker, anti-platelet therapy, beta-blocker and a statin in the preceding 12 months |          |                  | Community achievement 2019/20 (%): no comparable data in QOF 2019/20 data. Latest was QOF 2014/15 in which achievement was 70.57% |
|--------------------------------|--------------------------------------------------------------------------------------------------------------------------------------------------------------------------------------------------------------------------------------|----------|------------------|-----------------------------------------------------------------------------------------------------------------------------------|
|                                | Group: Cardiovascular Disease                                                                                                                                                                                                        | Variable | Population       |                                                                                                                                   |
| <b>Length of Stay (months)</b> |                                                                                                                                                                                                                                      |          |                  |                                                                                                                                   |
| 2017/18                        | <1                                                                                                                                                                                                                                   | 4,474    | 37 (0.8)         | 11 (29.7)                                                                                                                         |
|                                | 1-<6                                                                                                                                                                                                                                 | 8,075    | 78 (1.0)         | 40 (51.3)                                                                                                                         |
|                                | 6-<12                                                                                                                                                                                                                                | 3,672    | 54 (1.5)         | 30 (55.6)                                                                                                                         |
|                                | 12-<24                                                                                                                                                                                                                               | 2,832    | 50 (1.8)         | 21 (42.0)                                                                                                                         |
|                                | 24+                                                                                                                                                                                                                                  | 2,624    | 124 (4.7)        | 73 (58.9)                                                                                                                         |
| 2018/19                        | <1                                                                                                                                                                                                                                   | 4,801    | 60 (1.2)         | 20 (33.3)                                                                                                                         |
|                                | 1-<6                                                                                                                                                                                                                                 | 7,742    | 107 (1.4)        | 54 (50.5)                                                                                                                         |
|                                | 6-<12                                                                                                                                                                                                                                | 3,616    | 60 (1.7)         | 25 (41.7)                                                                                                                         |
|                                | 12-<24                                                                                                                                                                                                                               | 3,447    | 68 (2.0)         | 37 (54.4)                                                                                                                         |
|                                | 24+                                                                                                                                                                                                                                  | 2,493    | 134 (5.4)        | 87 (64.9)                                                                                                                         |
| 2019/20                        | <1                                                                                                                                                                                                                                   | 5,745    | 69 (1.2)         | 28 (40.6)                                                                                                                         |
|                                | 1-<6                                                                                                                                                                                                                                 | 9,697    | 117 (1.2)        | 57 (48.7)                                                                                                                         |
|                                | 6-<12                                                                                                                                                                                                                                | 5,090    | 97 (1.9)         | 45 (46.4)                                                                                                                         |
|                                | 12-<24                                                                                                                                                                                                                               | 3,244    | 83 (2.6)         | 42 (50.6)                                                                                                                         |
|                                | 24+                                                                                                                                                                                                                                  | 2,035    | 126 (6.2)        | 84 (66.7)                                                                                                                         |
| <b>Ethnic Group</b>            |                                                                                                                                                                                                                                      |          |                  |                                                                                                                                   |
| 2017/18                        | White                                                                                                                                                                                                                                | 15,638   | 290 (1.9)        | 145 (50.0)                                                                                                                        |
|                                | Mixed                                                                                                                                                                                                                                | 431      | <10 <sup>6</sup> | <10 <sup>6</sup>                                                                                                                  |
|                                | Asian or Asian British                                                                                                                                                                                                               | 813      | <10 <sup>6</sup> | <10 <sup>6</sup>                                                                                                                  |
|                                | Black or Black British                                                                                                                                                                                                               | 404      | <10 <sup>6</sup> | <10 <sup>6</sup>                                                                                                                  |
|                                | Chinese and Other                                                                                                                                                                                                                    | 214      | <10 <sup>6</sup> | <10 <sup>6</sup>                                                                                                                  |
|                                | Unclassified                                                                                                                                                                                                                         | 372      | 12 (3.2)         | <10 <sup>6</sup>                                                                                                                  |
| 2018/19                        | White                                                                                                                                                                                                                                | 14,911   | 341 (2.3)        | 176 (51.6)                                                                                                                        |
|                                | Mixed                                                                                                                                                                                                                                | 371      | <10 <sup>6</sup> | <10 <sup>6</sup>                                                                                                                  |
|                                | Asian or Asian British                                                                                                                                                                                                               | 726      | 13 (1.8)         | <10 <sup>6</sup>                                                                                                                  |
|                                | Black or Black British                                                                                                                                                                                                               | 364      | <10 <sup>6</sup> | <10 <sup>6</sup>                                                                                                                  |
|                                | Chinese and Other                                                                                                                                                                                                                    | 167      | <10 <sup>6</sup> | <10 <sup>6</sup>                                                                                                                  |
|                                | Unclassified                                                                                                                                                                                                                         | 409      | <10 <sup>6</sup> | <10 <sup>6</sup>                                                                                                                  |
| 2019/20                        | White                                                                                                                                                                                                                                | 16,606   | 376 (2.3)        | 198 (52.7)                                                                                                                        |
|                                | Mixed                                                                                                                                                                                                                                | 409      | <10 <sup>6</sup> | <10 <sup>6</sup>                                                                                                                  |
|                                | Asian or Asian British                                                                                                                                                                                                               | 755      | 21 (2.8)         | 10 (47.6)                                                                                                                         |
|                                | Black or Black British                                                                                                                                                                                                               | 451      | <10 <sup>6</sup> | <10 <sup>6</sup>                                                                                                                  |
|                                | Chinese and Other                                                                                                                                                                                                                    | 163      | <10 <sup>6</sup> | <10 <sup>6</sup>                                                                                                                  |
|                                | Unclassified                                                                                                                                                                                                                         | 387      | <10 <sup>6</sup> | <10 <sup>6</sup>                                                                                                                  |

<sup>1</sup>Eligible for indicator; <sup>2</sup>Achieve in current prison; <sup>3</sup>Achieve in previous prison; <sup>4</sup>Overall achievement - either current or previous prison; <sup>5</sup>Declined indicator; <sup>6</sup>Suppressed (<10) to avoid disclosure

| Indicator                     |           | The proportion of people with coronary heart disease who have received a prescription for anti-platelet or anti-coagulant therapy in the preceding 12 months |                                 |                                   |                                     |                                   |
|-------------------------------|-----------|--------------------------------------------------------------------------------------------------------------------------------------------------------------|---------------------------------|-----------------------------------|-------------------------------------|-----------------------------------|
| Group: Cardiovascular Disease |           | Population                                                                                                                                                   | Eligible <sup>1</sup> (% popln) | Satisfy <sup>2</sup> (% eligible) | Elsewhere <sup>3</sup> (% eligible) | Achieve <sup>4</sup> (% eligible) |
| Year                          | Variable  |                                                                                                                                                              |                                 |                                   |                                     |                                   |
|                               | 2017/18   | 21,677                                                                                                                                                       | 355 (1.6)                       | 262 (73.8)                        | <10 <sup>6</sup>                    | 265 (74.6)                        |
|                               | 2018/19   | 22,099                                                                                                                                                       | 441 (2.0)                       | 302 (68.5)                        | <10 <sup>6</sup>                    | 308 (69.8)                        |
|                               | 2019/20   | 25,811                                                                                                                                                       | 494 (1.9)                       | 351 (71.1)                        | <10 <sup>6</sup>                    | 360 (72.9)                        |
| <b>Prison</b>                 |           |                                                                                                                                                              |                                 |                                   |                                     |                                   |
| 2017/18                       | Prison 1  | 1,323                                                                                                                                                        | <10 <sup>6</sup>                | <10 <sup>6</sup>                  | <10 <sup>6</sup>                    | <10 <sup>6</sup>                  |
|                               | Prison 2  | 3,261                                                                                                                                                        | 47 (1.4)                        | 27 (57.4)                         | <10 <sup>6</sup>                    | 27 (57.4)                         |
|                               | Prison 3  | 2,623                                                                                                                                                        | 36 (1.4)                        | 26 (72.2)                         | <10 <sup>6</sup>                    | 27 (75.0)                         |
|                               | Prison 4  | 2,089                                                                                                                                                        | 52 (2.5)                        | 44 (84.6)                         | <10 <sup>6</sup>                    | 45 (86.5)                         |
|                               | Prison 5  | 637                                                                                                                                                          | <10 <sup>6</sup>                | <10 <sup>6</sup>                  | <10 <sup>6</sup>                    | <10 <sup>6</sup>                  |
|                               | Prison 6  | 1,552                                                                                                                                                        | 33 (2.1)                        | 24 (72.7)                         | <10 <sup>6</sup>                    | 25 (75.8)                         |
|                               | Prison 7  | 635                                                                                                                                                          | <10 <sup>6</sup>                | <10 <sup>6</sup>                  | <10 <sup>6</sup>                    | <10 <sup>6</sup>                  |
|                               | Prison 8  | 1,085                                                                                                                                                        | 12 (1.1)                        | <10 <sup>6</sup>                  | <10 <sup>6</sup>                    | <10 <sup>6</sup>                  |
|                               | Prison 9  | 981                                                                                                                                                          | 52 (5.3)                        | 43 (82.7)                         | <10 <sup>6</sup>                    | 43 (82.7)                         |
|                               | Prison 10 | 2,523                                                                                                                                                        | 16 (0.6)                        | 13 (81.3)                         | <10 <sup>6</sup>                    | 13 (81.3)                         |
|                               | Prison 11 | 3,470                                                                                                                                                        | 50 (1.4)                        | 33 (66.0)                         | <10 <sup>6</sup>                    | 33 (66.0)                         |
|                               | Prison 12 | 815                                                                                                                                                          | <10 <sup>6</sup>                | <10 <sup>6</sup>                  | <10 <sup>6</sup>                    | <10 <sup>6</sup>                  |
|                               | Prison 13 | 683                                                                                                                                                          | 35 (5.1)                        | 28 (80.0)                         | <10 <sup>6</sup>                    | 28 (80.0)                         |
| 2018/19                       | Prison 1  | 1,333                                                                                                                                                        | 10 (0.8)                        | <10 <sup>6</sup>                  | <10 <sup>6</sup>                    | <10 <sup>6</sup>                  |
|                               | Prison 2  | 2,705                                                                                                                                                        | 42 (1.6)                        | 31 (73.8)                         | <10 <sup>6</sup>                    | 31 (73.8)                         |
|                               | Prison 3  | 2,522                                                                                                                                                        | 32 (1.3)                        | 24 (75.0)                         | <10 <sup>6</sup>                    | 27 (84.4)                         |
|                               | Prison 4  | 2,349                                                                                                                                                        | 68 (2.9)                        | 55 (80.9)                         | <10 <sup>6</sup>                    | 56 (82.4)                         |
|                               | Prison 5  | 676                                                                                                                                                          | 14 (2.1)                        | 10 (71.4)                         | <10 <sup>6</sup>                    | 10 (71.4)                         |
|                               | Prison 6  | 1,513                                                                                                                                                        | 32 (2.1)                        | 20 (62.5)                         | <10 <sup>6</sup>                    | 20 (62.5)                         |
|                               | Prison 7  | 654                                                                                                                                                          | <10 <sup>6</sup>                | <10 <sup>6</sup>                  | <10 <sup>6</sup>                    | <10 <sup>6</sup>                  |
|                               | Prison 8  | 1,148                                                                                                                                                        | 23 (2.0)                        | <10 <sup>6</sup>                  | <10 <sup>6</sup>                    | <10 <sup>6</sup>                  |
|                               | Prison 9  | 996                                                                                                                                                          | 54 (5.4)                        | 44 (81.5)                         | <10 <sup>6</sup>                    | 44 (81.5)                         |
|                               | Prison 10 | 2,717                                                                                                                                                        | 55 (2.0)                        | 32 (58.2)                         | <10 <sup>6</sup>                    | 32 (58.2)                         |
|                               | Prison 11 | 4,020                                                                                                                                                        | 65 (1.6)                        | 37 (56.9)                         | <10 <sup>6</sup>                    | 38 (58.5)                         |
|                               | Prison 12 | 792                                                                                                                                                          | <10 <sup>6</sup>                | <10 <sup>6</sup>                  | <10 <sup>6</sup>                    | <10 <sup>6</sup>                  |
|                               | Prison 13 | 674                                                                                                                                                          | 38 (5.6)                        | 30 (78.9)                         | <10 <sup>6</sup>                    | 31 (81.6)                         |
| 2019/20                       | Prison 1  | 1,410                                                                                                                                                        | 22 (1.6)                        | 14 (63.6)                         | <10 <sup>6</sup>                    | 15 (68.2)                         |
|                               | Prison 2  | 2,979                                                                                                                                                        | 48 (1.6)                        | 38 (79.2)                         | <10 <sup>6</sup>                    | 38 (79.2)                         |
|                               | Prison 3  | 2,809                                                                                                                                                        | 41 (1.5)                        | 26 (63.4)                         | <10 <sup>6</sup>                    | 26 (63.4)                         |
|                               | Prison 4  | 2,651                                                                                                                                                        | 80 (3.0)                        | 66 (82.5)                         | <10 <sup>6</sup>                    | 67 (83.8)                         |
|                               | Prison 5  | 616                                                                                                                                                          | 10 (1.6)                        | <10 <sup>6</sup>                  | <10 <sup>6</sup>                    | <10 <sup>6</sup>                  |
|                               | Prison 6  | 1,533                                                                                                                                                        | 29 (1.9)                        | 21 (72.4)                         | <10 <sup>6</sup>                    | 21 (72.4)                         |
|                               | Prison 7  | 860                                                                                                                                                          | 12 (1.4)                        | <10 <sup>6</sup>                  | <10 <sup>6</sup>                    | <10 <sup>6</sup>                  |
|                               | Prison 8  | 1,385                                                                                                                                                        | 20 (1.4)                        | 11 (55.0)                         | <10 <sup>6</sup>                    | 11 (55.0)                         |
|                               | Prison 9  | 1,092                                                                                                                                                        | 65 (6.0)                        | 51 (78.5)                         | <10 <sup>6</sup>                    | 52 (80.0)                         |
|                               | Prison 10 | 3,577                                                                                                                                                        | 58 (1.6)                        | 36 (62.1)                         | <10 <sup>6</sup>                    | 38 (65.5)                         |
|                               | Prison 11 | 5,348                                                                                                                                                        | 71 (1.3)                        | 47 (66.2)                         | <10 <sup>6</sup>                    | 48 (67.6)                         |
|                               | Prison 12 | 805                                                                                                                                                          | <10 <sup>6</sup>                | <10 <sup>6</sup>                  | <10 <sup>6</sup>                    | <10 <sup>6</sup>                  |
|                               | Prison 13 | 746                                                                                                                                                          | 38 (5.1)                        | 29 (76.3)                         | <10 <sup>6</sup>                    | 30 (78.9)                         |
| <b>Prison category</b>        |           |                                                                                                                                                              |                                 |                                   |                                     |                                   |
| 2017/18                       | A         | 1,664                                                                                                                                                        | 87 (5.2)                        | 71 (81.6)                         | <10 <sup>6</sup>                    | 71 (81.6)                         |
|                               | B         | 9,254                                                                                                                                                        | 113 (1.2)                       | 73 (64.6)                         | <10 <sup>6</sup>                    | 73 (64.6)                         |
|                               | C         | 6,035                                                                                                                                                        | 96 (1.6)                        | 76 (79.2)                         | <10 <sup>6</sup>                    | 78 (81.3)                         |
|                               | Closed    | 1,720                                                                                                                                                        | 18 (1.0)                        | 10 (55.6)                         | <10 <sup>6</sup>                    | 10 (55.6)                         |
|                               | D         | 2,189                                                                                                                                                        | 41 (1.9)                        | 32 (78.0)                         | <10 <sup>6</sup>                    | 33 (80.5)                         |
|                               | YOI       | 815                                                                                                                                                          | <10 <sup>6</sup>                | <10 <sup>6</sup>                  | <10 <sup>6</sup>                    | <10 <sup>6</sup>                  |
| 2018/19                       | A         | 1,670                                                                                                                                                        | 92 (5.5)                        | 74 (80.4)                         | <10 <sup>6</sup>                    | 75 (81.5)                         |
|                               | B         | 9,442                                                                                                                                                        | 162 (1.7)                       | 100 (61.7)                        | <10 <sup>6</sup>                    | 101 (62.3)                        |
|                               | C         | 6,204                                                                                                                                                        | 110 (1.8)                       | 85 (77.3)                         | <10 <sup>6</sup>                    | 89 (80.9)                         |
|                               | Closed    | 1,802                                                                                                                                                        | 29 (1.6)                        | 12 (41.4)                         | <10 <sup>6</sup>                    | 12 (41.4)                         |
|                               | D         | 2,189                                                                                                                                                        | 46 (2.1)                        | 30 (65.2)                         | <10 <sup>6</sup>                    | 30 (65.2)                         |
|                               | YOI       | 792                                                                                                                                                          | <10 <sup>6</sup>                | <10 <sup>6</sup>                  | <10 <sup>6</sup>                    | <10 <sup>6</sup>                  |
| 2019/20                       | A         | 1,838                                                                                                                                                        | 103 (5.6)                       | 80 (77.7)                         | <10 <sup>6</sup>                    | 82 (79.6)                         |
|                               | B         | 11,904                                                                                                                                                       | 177 (1.5)                       | 121 (68.4)                        | <10 <sup>6</sup>                    | 124 (70.1)                        |
|                               | C         | 6,870                                                                                                                                                        | 143 (2.1)                       | 106 (74.1)                        | <10 <sup>6</sup>                    | 108 (75.5)                        |
|                               | Closed    | 2,245                                                                                                                                                        | 32 (1.4)                        | 15 (46.9)                         | <10 <sup>6</sup>                    | 17 (53.1)                         |
|                               | D         | 2,149                                                                                                                                                        | 39 (1.8)                        | 29 (74.4)                         | <10 <sup>6</sup>                    | 29 (74.4)                         |
|                               | YOI       | 805                                                                                                                                                          | <10 <sup>6</sup>                | <10 <sup>6</sup>                  | <10 <sup>6</sup>                    | <10 <sup>6</sup>                  |
| <b>Gender</b>                 |           |                                                                                                                                                              |                                 |                                   |                                     |                                   |
| 2017/18                       | F         | 1,699                                                                                                                                                        | 18 (1.1)                        | 10 (55.6)                         | <10 <sup>6</sup>                    | 10 (55.6)                         |
|                               | M         | 19,977                                                                                                                                                       | 337 (1.7)                       | 252 (74.8)                        | <10 <sup>6</sup>                    | 255 (75.7)                        |
| 2018/19                       | F         | 1,802                                                                                                                                                        | 28 (1.6)                        | 12 (42.9)                         | <10 <sup>6</sup>                    | 12 (42.9)                         |
|                               | M         | 20,295                                                                                                                                                       | 413 (2.0)                       | 290 (70.2)                        | <10 <sup>6</sup>                    | 296 (71.7)                        |
| 2019/20                       | F         | 1,376                                                                                                                                                        | 20 (1.5)                        | 11 (55.0)                         | <10 <sup>6</sup>                    | 11 (55.0)                         |
|                               | M         | 23,570                                                                                                                                                       | 462 (2.0)                       | 336 (72.7)                        | <10 <sup>6</sup>                    | 343 (74.2)                        |

<sup>1</sup>Eligible for indicator; <sup>2</sup>Achieve in current prison; <sup>3</sup>Achieve in previous prison; <sup>4</sup>Overall achievement - either current or previous prison; <sup>5</sup>Declined indicator; <sup>6</sup>Suppressed (<10) to avoid disclosure

| Indicator                     |                                | The proportion of people with coronary heart disease who have received a prescription for anti-platelet or anti-coagulant therapy in the preceding 12 months |                                 |                                   |                                     |                                   |
|-------------------------------|--------------------------------|--------------------------------------------------------------------------------------------------------------------------------------------------------------|---------------------------------|-----------------------------------|-------------------------------------|-----------------------------------|
| Group: Cardiovascular Disease |                                | Population                                                                                                                                                   | Eligible <sup>1</sup> (% popln) | Satisfy <sup>2</sup> (% eligible) | Elsewhere <sup>3</sup> (% eligible) | Achieve <sup>4</sup> (% eligible) |
| Variable                      |                                |                                                                                                                                                              |                                 |                                   |                                     |                                   |
| <b>Sentence Status</b>        |                                |                                                                                                                                                              |                                 |                                   |                                     |                                   |
| 2017/18                       | .                              | 81                                                                                                                                                           | <10 <sup>6</sup>                | <10 <sup>6</sup>                  | <10 <sup>6</sup>                    | <10 <sup>6</sup>                  |
|                               | Absconded                      | <10 <sup>6</sup>                                                                                                                                             | <10 <sup>6</sup>                | <10 <sup>6</sup>                  | <10 <sup>6</sup>                    | <10 <sup>6</sup>                  |
|                               | Active In                      | 15,872                                                                                                                                                       | 279 (1.8)                       | 215 (77.1)                        | <10 <sup>6</sup>                    | 217 (77.8)                        |
|                               | Active Out                     | 1,052                                                                                                                                                        | 13 (1.2)                        | <10 <sup>6</sup>                  | <10 <sup>6</sup>                    | <10 <sup>6</sup>                  |
|                               | Convicted Sentence             | 2,125                                                                                                                                                        | 27 (1.3)                        | 16 (59.3)                         | <10 <sup>6</sup>                    | 16 (59.3)                         |
|                               | Downgrade in security category | <10 <sup>6</sup>                                                                                                                                             | <10 <sup>6</sup>                | <10 <sup>6</sup>                  | <10 <sup>6</sup>                    | <10 <sup>6</sup>                  |
|                               | Internal Cell Move             | <10 <sup>6</sup>                                                                                                                                             | <10 <sup>6</sup>                | <10 <sup>6</sup>                  | <10 <sup>6</sup>                    | <10 <sup>6</sup>                  |
|                               | Judges Remand                  | 92                                                                                                                                                           | <10 <sup>6</sup>                | <10 <sup>6</sup>                  | <10 <sup>6</sup>                    | <10 <sup>6</sup>                  |
|                               | Licence Revoke                 | 52                                                                                                                                                           | <10 <sup>6</sup>                | <10 <sup>6</sup>                  | <10 <sup>6</sup>                    | <10 <sup>6</sup>                  |
|                               | On Remand                      | 1,492                                                                                                                                                        | 17 (1.1)                        | 14 (82.4)                         | <10 <sup>6</sup>                    | 14 (82.4)                         |
|                               | Transfer                       | 910                                                                                                                                                          | 16 (1.8)                        | 10 (62.5)                         | <10 <sup>6</sup>                    | 11 (68.8)                         |
|                               | Upgrade in security category   | <10 <sup>6</sup>                                                                                                                                             | <10 <sup>6</sup>                | <10 <sup>6</sup>                  | <10 <sup>6</sup>                    | <10 <sup>6</sup>                  |
| 2018/19                       | .                              | 88                                                                                                                                                           | <10 <sup>6</sup>                | <10 <sup>6</sup>                  | <10 <sup>6</sup>                    | <10 <sup>6</sup>                  |
|                               | Absconded                      | <10 <sup>6</sup>                                                                                                                                             | <10 <sup>6</sup>                | <10 <sup>6</sup>                  | <10 <sup>6</sup>                    | <10 <sup>6</sup>                  |
|                               | Active In                      | 18,145                                                                                                                                                       | 375 (2.1)                       | 264 (70.4)                        | <10 <sup>6</sup>                    | 270 (72.0)                        |
|                               | Active Out                     | 835                                                                                                                                                          | 18 (2.2)                        | <10 <sup>6</sup>                  | <10 <sup>6</sup>                    | <10 <sup>6</sup>                  |
|                               | Convicted Sentence             | 1,320                                                                                                                                                        | 21 (1.6)                        | 16 (76.2)                         | <10 <sup>6</sup>                    | 16 (76.2)                         |
|                               | Downgrade in security category | <10 <sup>6</sup>                                                                                                                                             | <10 <sup>6</sup>                | <10 <sup>6</sup>                  | <10 <sup>6</sup>                    | <10 <sup>6</sup>                  |
|                               | Internal Cell Move             | <10 <sup>6</sup>                                                                                                                                             | <10 <sup>6</sup>                | <10 <sup>6</sup>                  | <10 <sup>6</sup>                    | <10 <sup>6</sup>                  |
|                               | Judges Remand                  | <10 <sup>6</sup>                                                                                                                                             | <10 <sup>6</sup>                | <10 <sup>6</sup>                  | <10 <sup>6</sup>                    | <10 <sup>6</sup>                  |
|                               | Licence Revoke                 | 125                                                                                                                                                          | <10 <sup>6</sup>                | <10 <sup>6</sup>                  | <10 <sup>6</sup>                    | <10 <sup>6</sup>                  |
|                               | On Remand                      | 1,059                                                                                                                                                        | 15 (1.4)                        | 11 (73.3)                         | <10 <sup>6</sup>                    | 11 (73.3)                         |
|                               | Transfer                       | 518                                                                                                                                                          | <10 <sup>6</sup>                | <10 <sup>6</sup>                  | <10 <sup>6</sup>                    | <10 <sup>6</sup>                  |
|                               | Upgrade in security category   | <10 <sup>6</sup>                                                                                                                                             | <10 <sup>6</sup>                | <10 <sup>6</sup>                  | <10 <sup>6</sup>                    | <10 <sup>6</sup>                  |
| 2019/20                       | .                              | 69                                                                                                                                                           | <10 <sup>6</sup>                | <10 <sup>6</sup>                  | <10 <sup>6</sup>                    | <10 <sup>6</sup>                  |
|                               | Absconded                      | <10 <sup>6</sup>                                                                                                                                             | <10 <sup>6</sup>                | <10 <sup>6</sup>                  | <10 <sup>6</sup>                    | <10 <sup>6</sup>                  |
|                               | Active In                      | 22,424                                                                                                                                                       | 435 (1.9)                       | 311 (71.5)                        | <10 <sup>6</sup>                    | 320 (73.6)                        |
|                               | Active Out                     | 625                                                                                                                                                          | <10 <sup>6</sup>                | <10 <sup>6</sup>                  | <10 <sup>6</sup>                    | <10 <sup>6</sup>                  |
|                               | Convicted Sentence             | 1,361                                                                                                                                                        | 26 (1.9)                        | 17 (65.4)                         | <10 <sup>6</sup>                    | 17 (65.4)                         |
|                               | Downgrade in security category | <10 <sup>6</sup>                                                                                                                                             | <10 <sup>6</sup>                | <10 <sup>6</sup>                  | <10 <sup>6</sup>                    | <10 <sup>6</sup>                  |
|                               | Internal Cell Move             | <10 <sup>6</sup>                                                                                                                                             | <10 <sup>6</sup>                | <10 <sup>6</sup>                  | <10 <sup>6</sup>                    | <10 <sup>6</sup>                  |
|                               | Judges Remand                  | 19                                                                                                                                                           | <10 <sup>6</sup>                | <10 <sup>6</sup>                  | <10 <sup>6</sup>                    | <10 <sup>6</sup>                  |
|                               | Licence Revoke                 | 178                                                                                                                                                          | <10 <sup>6</sup>                | <10 <sup>6</sup>                  | <10 <sup>6</sup>                    | <10 <sup>6</sup>                  |
|                               | On Remand                      | 1,031                                                                                                                                                        | 16 (1.6)                        | 13 (81.3)                         | <10 <sup>6</sup>                    | 13 (81.3)                         |
|                               | Transfer                       | 101                                                                                                                                                          | <10 <sup>6</sup>                | <10 <sup>6</sup>                  | <10 <sup>6</sup>                    | <10 <sup>6</sup>                  |
|                               | Upgrade in security category   | <10 <sup>6</sup>                                                                                                                                             | <10 <sup>6</sup>                | <10 <sup>6</sup>                  | <10 <sup>6</sup>                    | <10 <sup>6</sup>                  |
| <b>Age - years</b>            |                                |                                                                                                                                                              |                                 |                                   |                                     |                                   |
| 2017/18                       | 10 - <20                       | 468                                                                                                                                                          | <10 <sup>6</sup>                | <10 <sup>6</sup>                  | <10 <sup>6</sup>                    | <10 <sup>6</sup>                  |
|                               | 20 - <30                       | 6,994                                                                                                                                                        | <10 <sup>6</sup>                | <10 <sup>6</sup>                  | <10 <sup>6</sup>                    | <10 <sup>6</sup>                  |
|                               | 30 - <40                       | 7,051                                                                                                                                                        | 18 (0.3)                        | <10 <sup>6</sup>                  | <10 <sup>6</sup>                    | <10 <sup>6</sup>                  |
|                               | 40 - <50                       | 4,114                                                                                                                                                        | 56 (1.4)                        | 34 (60.7)                         | <10 <sup>6</sup>                    | 35 (62.5)                         |
|                               | 50 - <60                       | 2,107                                                                                                                                                        | 127 (6.0)                       | 101 (79.5)                        | <10 <sup>6</sup>                    | 101 (79.5)                        |
|                               | 60 - <70                       | 684                                                                                                                                                          | 101 (14.8)                      | 79 (78.2)                         | <10 <sup>6</sup>                    | 80 (79.2)                         |
|                               | 70 - <80                       | 213                                                                                                                                                          | 42 (19.7)                       | 35 (83.3)                         | <10 <sup>6</sup>                    | 36 (85.7)                         |
|                               | 80 - <90                       | 40                                                                                                                                                           | <10 <sup>6</sup>                | <10 <sup>6</sup>                  | <10 <sup>6</sup>                    | <10 <sup>6</sup>                  |
|                               | 90 - <100                      | <10 <sup>6</sup>                                                                                                                                             | <10 <sup>6</sup>                | <10 <sup>6</sup>                  | <10 <sup>6</sup>                    | <10 <sup>6</sup>                  |
|                               | 100 - <110                     | <10 <sup>6</sup>                                                                                                                                             | <10 <sup>6</sup>                | <10 <sup>6</sup>                  | <10 <sup>6</sup>                    | <10 <sup>6</sup>                  |
| 2018/19                       | 10 - <20                       | 436                                                                                                                                                          | <10 <sup>6</sup>                | <10 <sup>6</sup>                  | <10 <sup>6</sup>                    | <10 <sup>6</sup>                  |
|                               | 20 - <30                       | 7,163                                                                                                                                                        | 11 (0.2)                        | <10 <sup>6</sup>                  | <10 <sup>6</sup>                    | <10 <sup>6</sup>                  |
|                               | 30 - <40                       | 7,381                                                                                                                                                        | 38 (0.5)                        | 10 (26.3)                         | <10 <sup>6</sup>                    | 10 (26.3)                         |
|                               | 40 - <50                       | 4,180                                                                                                                                                        | 70 (1.7)                        | 37 (52.9)                         | <10 <sup>6</sup>                    | 38 (54.3)                         |
|                               | 50 - <60                       | 1,978                                                                                                                                                        | 152 (7.7)                       | 115 (75.7)                        | <10 <sup>6</sup>                    | 116 (76.3)                        |
|                               | 60 - <70                       | 701                                                                                                                                                          | 116 (16.5)                      | 90 (77.6)                         | <10 <sup>6</sup>                    | 93 (80.2)                         |
|                               | 70 - <80                       | 209                                                                                                                                                          | 41 (19.6)                       | 34 (82.9)                         | <10 <sup>6</sup>                    | 34 (82.9)                         |
|                               | 80 - <90                       | 45                                                                                                                                                           | 13 (28.9)                       | 11 (84.6)                         | <10 <sup>6</sup>                    | 12 (92.3)                         |
|                               | 90 - <100                      | <10 <sup>6</sup>                                                                                                                                             | <10 <sup>6</sup>                | <10 <sup>6</sup>                  | <10 <sup>6</sup>                    | <10 <sup>6</sup>                  |
|                               | 100 - <110                     | <10 <sup>6</sup>                                                                                                                                             | <10 <sup>6</sup>                | <10 <sup>6</sup>                  | <10 <sup>6</sup>                    | <10 <sup>6</sup>                  |
| 2019/20                       | 10 - <20                       | 404                                                                                                                                                          | <10 <sup>6</sup>                | <10 <sup>6</sup>                  | <10 <sup>6</sup>                    | <10 <sup>6</sup>                  |
|                               | 20 - <30                       | 8,064                                                                                                                                                        | <10 <sup>6</sup>                | <10 <sup>6</sup>                  | <10 <sup>6</sup>                    | <10 <sup>6</sup>                  |
|                               | 30 - <40                       | 9,125                                                                                                                                                        | 37 (0.4)                        | <10 <sup>6</sup>                  | <10 <sup>6</sup>                    | <10 <sup>6</sup>                  |
|                               | 40 - <50                       | 4,948                                                                                                                                                        | 84 (1.7)                        | 44 (52.4)                         | <10 <sup>6</sup>                    | 45 (53.6)                         |
|                               | 50 - <60                       | 2,224                                                                                                                                                        | 164 (7.4)                       | 126 (76.8)                        | <10 <sup>6</sup>                    | 129 (78.7)                        |
|                               | 60 - <70                       | 751                                                                                                                                                          | 137 (18.2)                      | 113 (82.5)                        | <10 <sup>6</sup>                    | 117 (85.4)                        |
|                               | 70 - <80                       | 238                                                                                                                                                          | 49 (20.6)                       | 43 (87.8)                         | <10 <sup>6</sup>                    | 43 (87.8)                         |
|                               | 80 - <90                       | 53                                                                                                                                                           | 13 (24.5)                       | 12 (92.3)                         | <10 <sup>6</sup>                    | 12 (92.3)                         |
|                               | 90 - <100                      | <10 <sup>6</sup>                                                                                                                                             | <10 <sup>6</sup>                | <10 <sup>6</sup>                  | <10 <sup>6</sup>                    | <10 <sup>6</sup>                  |
|                               | 100 - <110                     | <10 <sup>6</sup>                                                                                                                                             | <10 <sup>6</sup>                | <10 <sup>6</sup>                  | <10 <sup>6</sup>                    | <10 <sup>6</sup>                  |

<sup>1</sup>Eligible for indicator; <sup>2</sup>Achieve in current prison; <sup>3</sup>Achieve in previous prison; <sup>4</sup>Overall achievement - either current or previous prison; <sup>5</sup>Declined indicator; <sup>6</sup>Suppressed (<10) to avoid disclosure



| Indicator                      |                        | <i>The proportion of people with coronary heart disease who have received a prescription for anti-platelet or anti-coagulant therapy in the preceding 12 months</i> |                                 |                                   |                                     |                                   | Community<br>achievement 2019/20:<br>90.87% (QOF 19/20) |
|--------------------------------|------------------------|---------------------------------------------------------------------------------------------------------------------------------------------------------------------|---------------------------------|-----------------------------------|-------------------------------------|-----------------------------------|---------------------------------------------------------|
| Group: Cardiovascular Disease  |                        | Population                                                                                                                                                          | Eligible <sup>1</sup> (% popln) | Satisfy <sup>2</sup> (% eligible) | Elsewhere <sup>3</sup> (% eligible) | Achieve <sup>4</sup> (% eligible) |                                                         |
| Variable                       |                        |                                                                                                                                                                     |                                 |                                   |                                     |                                   |                                                         |
| <b>Length of Stay (months)</b> |                        |                                                                                                                                                                     |                                 |                                   |                                     |                                   |                                                         |
| 2017/18                        | <1                     | 4,474                                                                                                                                                               | 37 (0.8)                        | 16 (43.2)                         | <10 <sup>6</sup>                    | 17 (45.9)                         |                                                         |
|                                | 1-<6                   | 8,075                                                                                                                                                               | 78 (1.0)                        | 54 (69.2)                         | <10 <sup>6</sup>                    | 55 (70.5)                         |                                                         |
|                                | 6-<12                  | 3,672                                                                                                                                                               | 54 (1.5)                        | 46 (85.2)                         | <10 <sup>6</sup>                    | 46 (85.2)                         |                                                         |
|                                | 12-<24                 | 2,832                                                                                                                                                               | 51 (1.8)                        | 37 (72.5)                         | <10 <sup>6</sup>                    | 37 (72.5)                         |                                                         |
|                                | 24+                    | 2,624                                                                                                                                                               | 135 (5.1)                       | 109 (80.7)                        | <10 <sup>6</sup>                    | 110 (81.5)                        |                                                         |
| 2018/19                        | <1                     | 4,801                                                                                                                                                               | 60 (1.2)                        | 26 (43.3)                         | <10 <sup>6</sup>                    | 29 (48.3)                         |                                                         |
|                                | 1-<6                   | 7,742                                                                                                                                                               | 107 (1.4)                       | 69 (64.5)                         | <10 <sup>6</sup>                    | 70 (65.4)                         |                                                         |
|                                | 6-<12                  | 3,616                                                                                                                                                               | 61 (1.7)                        | 40 (65.6)                         | <10 <sup>6</sup>                    | 41 (67.2)                         |                                                         |
|                                | 12-<24                 | 3,447                                                                                                                                                               | 73 (2.1)                        | 55 (75.3)                         | <10 <sup>6</sup>                    | 56 (76.7)                         |                                                         |
|                                | 24+                    | 2,493                                                                                                                                                               | 140 (5.6)                       | 112 (80.0)                        | <10 <sup>6</sup>                    | 112 (80.0)                        |                                                         |
| 2019/20                        | <1                     | 5,745                                                                                                                                                               | 69 (1.2)                        | 37 (53.6)                         | <10 <sup>6</sup>                    | 39 (56.5)                         |                                                         |
|                                | 1-<6                   | 9,697                                                                                                                                                               | 117 (1.2)                       | 75 (64.1)                         | <10 <sup>6</sup>                    | 79 (67.5)                         |                                                         |
|                                | 6-<12                  | 5,090                                                                                                                                                               | 97 (1.9)                        | 67 (69.1)                         | <10 <sup>6</sup>                    | 70 (72.2)                         |                                                         |
|                                | 12-<24                 | 3,244                                                                                                                                                               | 84 (2.6)                        | 69 (82.1)                         | <10 <sup>6</sup>                    | 69 (82.1)                         |                                                         |
|                                | 24+                    | 2,035                                                                                                                                                               | 127 (6.2)                       | 103 (81.1)                        | <10 <sup>6</sup>                    | 103 (81.1)                        |                                                         |
| <b>Ethnic Group</b>            |                        |                                                                                                                                                                     |                                 |                                   |                                     |                                   |                                                         |
| 2017/18                        | White                  | 15,638                                                                                                                                                              | 302 (1.9)                       | 226 (74.8)                        | <10 <sup>6</sup>                    | 229 (75.8)                        |                                                         |
|                                | Mixed                  | 431                                                                                                                                                                 | <10 <sup>6</sup>                | <10 <sup>6</sup>                  | <10 <sup>6</sup>                    | <10 <sup>6</sup>                  |                                                         |
|                                | Asian or Asian British | 813                                                                                                                                                                 | <10 <sup>6</sup>                | <10 <sup>6</sup>                  | <10 <sup>6</sup>                    | <10 <sup>6</sup>                  |                                                         |
|                                | Black or Black British | 404                                                                                                                                                                 | <10 <sup>6</sup>                | <10 <sup>6</sup>                  | <10 <sup>6</sup>                    | <10 <sup>6</sup>                  |                                                         |
|                                | Chinese and Other      | 214                                                                                                                                                                 | <10 <sup>6</sup>                | <10 <sup>6</sup>                  | <10 <sup>6</sup>                    | <10 <sup>6</sup>                  |                                                         |
|                                | Unclassified           | 372                                                                                                                                                                 | 12 (3.2)                        | <10 <sup>6</sup>                  | <10 <sup>6</sup>                    | <10 <sup>6</sup>                  |                                                         |
| 2018/19                        | White                  | 14,911                                                                                                                                                              | 351 (2.4)                       | 247 (70.4)                        | <10 <sup>6</sup>                    | 252 (71.8)                        |                                                         |
|                                | Mixed                  | 371                                                                                                                                                                 | <10 <sup>6</sup>                | <10 <sup>6</sup>                  | <10 <sup>6</sup>                    | <10 <sup>6</sup>                  |                                                         |
|                                | Asian or Asian British | 726                                                                                                                                                                 | 14 (1.9)                        | <10 <sup>6</sup>                  | <10 <sup>6</sup>                    | <10 <sup>6</sup>                  |                                                         |
|                                | Black or Black British | 364                                                                                                                                                                 | <10 <sup>6</sup>                | <10 <sup>6</sup>                  | <10 <sup>6</sup>                    | <10 <sup>6</sup>                  |                                                         |
|                                | Chinese and Other      | 167                                                                                                                                                                 | <10 <sup>6</sup>                | <10 <sup>6</sup>                  | <10 <sup>6</sup>                    | <10 <sup>6</sup>                  |                                                         |
|                                | Unclassified           | 409                                                                                                                                                                 | <10 <sup>6</sup>                | <10 <sup>6</sup>                  | <10 <sup>6</sup>                    | <10 <sup>6</sup>                  |                                                         |
| 2019/20                        | White                  | 16,606                                                                                                                                                              | 378 (2.3)                       | 275 (72.8)                        | <10 <sup>6</sup>                    | 283 (74.9)                        |                                                         |
|                                | Mixed                  | 409                                                                                                                                                                 | <10 <sup>6</sup>                | <10 <sup>6</sup>                  | <10 <sup>6</sup>                    | <10 <sup>6</sup>                  |                                                         |
|                                | Asian or Asian British | 755                                                                                                                                                                 | 21 (2.8)                        | 12 (57.1)                         | <10 <sup>6</sup>                    | 12 (57.1)                         |                                                         |
|                                | Black or Black British | 451                                                                                                                                                                 | <10 <sup>6</sup>                | <10 <sup>6</sup>                  | <10 <sup>6</sup>                    | <10 <sup>6</sup>                  |                                                         |
|                                | Chinese and Other      | 163                                                                                                                                                                 | <10 <sup>6</sup>                | <10 <sup>6</sup>                  | <10 <sup>6</sup>                    | <10 <sup>6</sup>                  |                                                         |
|                                | Unclassified           | 387                                                                                                                                                                 | <10 <sup>6</sup>                | <10 <sup>6</sup>                  | <10 <sup>6</sup>                    | <10 <sup>6</sup>                  |                                                         |

<sup>1</sup>Eligible for indicator; <sup>2</sup>Achieve in current prison; <sup>3</sup>Achieve in previous prison; <sup>4</sup>Overall achievement - either current or previous prison; <sup>5</sup>Declined indicator; <sup>6</sup>Suppressed (<10) to avoid disclosure

| Indicator                     |            | The proportion of people with heart failure who have been prescribed an ACE-inhibitor or angiotensin receptor blocker in the preceding 12 months |                                   |                                     |                                   |                  |
|-------------------------------|------------|--------------------------------------------------------------------------------------------------------------------------------------------------|-----------------------------------|-------------------------------------|-----------------------------------|------------------|
| Group: Cardiovascular Disease |            |                                                                                                                                                  |                                   |                                     |                                   |                  |
| Variable                      | Population | Eligible <sup>1</sup> (% popln)                                                                                                                  | Satisfy <sup>2</sup> (% eligible) | Elsewhere <sup>3</sup> (% eligible) | Achieve <sup>4</sup> (% eligible) |                  |
| <b>Year</b>                   |            |                                                                                                                                                  |                                   |                                     |                                   |                  |
|                               | 2017/18    | 21,677                                                                                                                                           | 61 (0.3)                          | 44 (72.1)                           | <10 <sup>6</sup>                  | 46 (75.4)        |
|                               | 2018/19    | 22,099                                                                                                                                           | 75 (0.3)                          | 50 (66.7)                           | <10 <sup>6</sup>                  | 52 (69.3)        |
|                               | 2019/20    | 25,811                                                                                                                                           | 98 (0.4)                          | 61 (62.2)                           | <10 <sup>6</sup>                  | 62 (63.3)        |
| <b>Prison</b>                 |            |                                                                                                                                                  |                                   |                                     |                                   |                  |
| 2017/18                       | Prison 1   | 1,323                                                                                                                                            | <10 <sup>6</sup>                  | <10 <sup>6</sup>                    | <10 <sup>6</sup>                  | <10 <sup>6</sup> |
|                               | Prison 2   | 3,261                                                                                                                                            | <10 <sup>6</sup>                  | <10 <sup>6</sup>                    | <10 <sup>6</sup>                  | <10 <sup>6</sup> |
|                               | Prison 3   | 2,623                                                                                                                                            | 10 (0.4)                          | <10 <sup>6</sup>                    | <10 <sup>6</sup>                  | 10 (100.0)       |
|                               | Prison 4   | 2,089                                                                                                                                            | 13 (0.6)                          | 10 (76.9)                           | <10 <sup>6</sup>                  | 10 (76.9)        |
|                               | Prison 5   | 637                                                                                                                                              | <10 <sup>6</sup>                  | <10 <sup>6</sup>                    | <10 <sup>6</sup>                  | <10 <sup>6</sup> |
|                               | Prison 6   | 1,552                                                                                                                                            | <10 <sup>6</sup>                  | <10 <sup>6</sup>                    | <10 <sup>6</sup>                  | <10 <sup>6</sup> |
|                               | Prison 7   | 635                                                                                                                                              | <10 <sup>6</sup>                  | <10 <sup>6</sup>                    | <10 <sup>6</sup>                  | <10 <sup>6</sup> |
|                               | Prison 8   | 1,085                                                                                                                                            | <10 <sup>6</sup>                  | <10 <sup>6</sup>                    | <10 <sup>6</sup>                  | <10 <sup>6</sup> |
|                               | Prison 9   | 981                                                                                                                                              | <10 <sup>6</sup>                  | <10 <sup>6</sup>                    | <10 <sup>6</sup>                  | <10 <sup>6</sup> |
|                               | Prison 10  | 2,523                                                                                                                                            | <10 <sup>6</sup>                  | <10 <sup>6</sup>                    | <10 <sup>6</sup>                  | <10 <sup>6</sup> |
|                               | Prison 11  | 3,470                                                                                                                                            | 11 (0.3)                          | <10 <sup>6</sup>                    | <10 <sup>6</sup>                  | <10 <sup>6</sup> |
|                               | Prison 12  | 815                                                                                                                                              | <10 <sup>6</sup>                  | <10 <sup>6</sup>                    | <10 <sup>6</sup>                  | <10 <sup>6</sup> |
|                               | Prison 13  | 683                                                                                                                                              | <10 <sup>6</sup>                  | <10 <sup>6</sup>                    | <10 <sup>6</sup>                  | <10 <sup>6</sup> |
| 2018/19                       | Prison 1   | 1,333                                                                                                                                            | <10 <sup>6</sup>                  | <10 <sup>6</sup>                    | <10 <sup>6</sup>                  | <10 <sup>6</sup> |
|                               | Prison 2   | 2,705                                                                                                                                            | <10 <sup>6</sup>                  | <10 <sup>6</sup>                    | <10 <sup>6</sup>                  | <10 <sup>6</sup> |
|                               | Prison 3   | 2,522                                                                                                                                            | 13 (0.5)                          | 10 (76.9)                           | <10 <sup>6</sup>                  | 11 (84.6)        |
|                               | Prison 4   | 2,349                                                                                                                                            | 19 (0.8)                          | 13 (68.4)                           | <10 <sup>6</sup>                  | 13 (68.4)        |
|                               | Prison 5   | 676                                                                                                                                              | <10 <sup>6</sup>                  | <10 <sup>6</sup>                    | <10 <sup>6</sup>                  | <10 <sup>6</sup> |
|                               | Prison 6   | 1,513                                                                                                                                            | <10 <sup>6</sup>                  | <10 <sup>6</sup>                    | <10 <sup>6</sup>                  | <10 <sup>6</sup> |
|                               | Prison 7   | 654                                                                                                                                              | <10 <sup>6</sup>                  | <10 <sup>6</sup>                    | <10 <sup>6</sup>                  | <10 <sup>6</sup> |
|                               | Prison 8   | 1,148                                                                                                                                            | <10 <sup>6</sup>                  | <10 <sup>6</sup>                    | <10 <sup>6</sup>                  | <10 <sup>6</sup> |
|                               | Prison 9   | 996                                                                                                                                              | <10 <sup>6</sup>                  | <10 <sup>6</sup>                    | <10 <sup>6</sup>                  | <10 <sup>6</sup> |
|                               | Prison 10  | 2,717                                                                                                                                            | <10 <sup>6</sup>                  | <10 <sup>6</sup>                    | <10 <sup>6</sup>                  | <10 <sup>6</sup> |
|                               | Prison 11  | 4,020                                                                                                                                            | <10 <sup>6</sup>                  | <10 <sup>6</sup>                    | <10 <sup>6</sup>                  | <10 <sup>6</sup> |
|                               | Prison 12  | 792                                                                                                                                              | <10 <sup>6</sup>                  | <10 <sup>6</sup>                    | <10 <sup>6</sup>                  | <10 <sup>6</sup> |
|                               | Prison 13  | 674                                                                                                                                              | <10 <sup>6</sup>                  | <10 <sup>6</sup>                    | <10 <sup>6</sup>                  | <10 <sup>6</sup> |
| 2019/20                       | Prison 1   | 1,410                                                                                                                                            | <10 <sup>6</sup>                  | <10 <sup>6</sup>                    | <10 <sup>6</sup>                  | <10 <sup>6</sup> |
|                               | Prison 2   | 2,979                                                                                                                                            | <10 <sup>6</sup>                  | <10 <sup>6</sup>                    | <10 <sup>6</sup>                  | <10 <sup>6</sup> |
|                               | Prison 3   | 2,809                                                                                                                                            | 18 (0.6)                          | 11 (61.1)                           | <10 <sup>6</sup>                  | 11 (61.1)        |
|                               | Prison 4   | 2,651                                                                                                                                            | 16 (0.6)                          | 12 (75.0)                           | <10 <sup>6</sup>                  | 12 (75.0)        |
|                               | Prison 5   | 616                                                                                                                                              | <10 <sup>6</sup>                  | <10 <sup>6</sup>                    | <10 <sup>6</sup>                  | <10 <sup>6</sup> |
|                               | Prison 6   | 1,533                                                                                                                                            | <10 <sup>6</sup>                  | <10 <sup>6</sup>                    | <10 <sup>6</sup>                  | <10 <sup>6</sup> |
|                               | Prison 7   | 860                                                                                                                                              | <10 <sup>6</sup>                  | <10 <sup>6</sup>                    | <10 <sup>6</sup>                  | <10 <sup>6</sup> |
|                               | Prison 8   | 1,385                                                                                                                                            | <10 <sup>6</sup>                  | <10 <sup>6</sup>                    | <10 <sup>6</sup>                  | <10 <sup>6</sup> |
|                               | Prison 9   | 1,092                                                                                                                                            | 11 (1.0)                          | <10 <sup>6</sup>                    | <10 <sup>6</sup>                  | <10 <sup>6</sup> |
|                               | Prison 10  | 3,577                                                                                                                                            | 13 (0.4)                          | 11 (84.6)                           | <10 <sup>6</sup>                  | 11 (84.6)        |
|                               | Prison 11  | 5,348                                                                                                                                            | 15 (0.3)                          | <10 <sup>6</sup>                    | <10 <sup>6</sup>                  | <10 <sup>6</sup> |
|                               | Prison 12  | 805                                                                                                                                              | <10 <sup>6</sup>                  | <10 <sup>6</sup>                    | <10 <sup>6</sup>                  | <10 <sup>6</sup> |
|                               | Prison 13  | 746                                                                                                                                              | <10 <sup>6</sup>                  | <10 <sup>6</sup>                    | <10 <sup>6</sup>                  | <10 <sup>6</sup> |
| <b>Prison category</b>        |            |                                                                                                                                                  |                                   |                                     |                                   |                  |
| 2017/18                       | A          | 1,664                                                                                                                                            | <10 <sup>6</sup>                  | <10 <sup>6</sup>                    | <10 <sup>6</sup>                  | <10 <sup>6</sup> |
|                               | B          | 9,254                                                                                                                                            | 19 (0.2)                          | 14 (73.7)                           | <10 <sup>6</sup>                  | 14 (73.7)        |
|                               | C          | 6,035                                                                                                                                            | 23 (0.4)                          | 19 (82.6)                           | <10 <sup>6</sup>                  | 20 (87.0)        |
|                               | Closed     | 1,720                                                                                                                                            | <10 <sup>6</sup>                  | <10 <sup>6</sup>                    | <10 <sup>6</sup>                  | <10 <sup>6</sup> |
|                               | D          | 2,189                                                                                                                                            | <10 <sup>6</sup>                  | <10 <sup>6</sup>                    | <10 <sup>6</sup>                  | <10 <sup>6</sup> |
|                               | YOI        | 815                                                                                                                                              | <10 <sup>6</sup>                  | <10 <sup>6</sup>                    | <10 <sup>6</sup>                  | <10 <sup>6</sup> |
| 2018/19                       | A          | 1,670                                                                                                                                            | 11 (0.7)                          | <10 <sup>6</sup>                    | <10 <sup>6</sup>                  | <10 <sup>6</sup> |
|                               | B          | 9,442                                                                                                                                            | 20 (0.2)                          | 14 (70.0)                           | <10 <sup>6</sup>                  | 14 (70.0)        |
|                               | C          | 6,204                                                                                                                                            | 33 (0.5)                          | 24 (72.7)                           | <10 <sup>6</sup>                  | 25 (75.8)        |
|                               | Closed     | 1,802                                                                                                                                            | <10 <sup>6</sup>                  | <10 <sup>6</sup>                    | <10 <sup>6</sup>                  | <10 <sup>6</sup> |
|                               | D          | 2,189                                                                                                                                            | <10 <sup>6</sup>                  | <10 <sup>6</sup>                    | <10 <sup>6</sup>                  | <10 <sup>6</sup> |
|                               | YOI        | 792                                                                                                                                              | <10 <sup>6</sup>                  | <10 <sup>6</sup>                    | <10 <sup>6</sup>                  | <10 <sup>6</sup> |
| 2019/20                       | A          | 1,838                                                                                                                                            | 14 (0.8)                          | <10 <sup>6</sup>                    | <10 <sup>6</sup>                  | <10 <sup>6</sup> |
|                               | B          | 11,904                                                                                                                                           | 34 (0.3)                          | 23 (67.6)                           | <10 <sup>6</sup>                  | 23 (67.6)        |
|                               | C          | 6,870                                                                                                                                            | 36 (0.5)                          | 24 (66.7)                           | <10 <sup>6</sup>                  | 25 (69.4)        |
|                               | Closed     | 2,245                                                                                                                                            | <10 <sup>6</sup>                  | <10 <sup>6</sup>                    | <10 <sup>6</sup>                  | <10 <sup>6</sup> |
|                               | D          | 2,149                                                                                                                                            | <10 <sup>6</sup>                  | <10 <sup>6</sup>                    | <10 <sup>6</sup>                  | <10 <sup>6</sup> |
|                               | YOI        | 805                                                                                                                                              | <10 <sup>6</sup>                  | <10 <sup>6</sup>                    | <10 <sup>6</sup>                  | <10 <sup>6</sup> |
| <b>Gender</b>                 |            |                                                                                                                                                  |                                   |                                     |                                   |                  |
| 2017/18                       | F          | 1,699                                                                                                                                            | <10 <sup>6</sup>                  | <10 <sup>6</sup>                    | <10 <sup>6</sup>                  | <10 <sup>6</sup> |
|                               | M          | 19,977                                                                                                                                           | 60 (0.3)                          | 43 (71.7)                           | <10 <sup>6</sup>                  | 45 (75.0)        |
| 2018/19                       | F          | 1,802                                                                                                                                            | <10 <sup>6</sup>                  | <10 <sup>6</sup>                    | <10 <sup>6</sup>                  | <10 <sup>6</sup> |
|                               | M          | 20,295                                                                                                                                           | 72 (0.4)                          | 49 (68.1)                           | <10 <sup>6</sup>                  | 51 (70.8)        |
| 2019/20                       | F          | 1,376                                                                                                                                            | <10 <sup>6</sup>                  | <10 <sup>6</sup>                    | <10 <sup>6</sup>                  | <10 <sup>6</sup> |
|                               | M          | 23,570                                                                                                                                           | 91 (0.4)                          | 59 (64.8)                           | <10 <sup>6</sup>                  | 60 (65.9)        |

<sup>1</sup>Eligible for indicator; <sup>2</sup>Achieve in current prison; <sup>3</sup>Achieve in previous prison; <sup>4</sup>Overall achievement - either current or previous prison; <sup>5</sup>Declined indicator; <sup>6</sup>Suppressed (<10) to avoid disclosure

| Indicator              | The proportion of people with heart failure who have been prescribed an ACE-inhibitor or angiotensin receptor blocker in the preceding 12 months |                                 |                                   |                                     |                                   | Community achievement 2019/20:<br>81.95% (QOF 19/20) |
|------------------------|--------------------------------------------------------------------------------------------------------------------------------------------------|---------------------------------|-----------------------------------|-------------------------------------|-----------------------------------|------------------------------------------------------|
|                        | Group: Cardiovascular Disease                                                                                                                    |                                 |                                   |                                     |                                   |                                                      |
| Variable               | Population                                                                                                                                       | Eligible <sup>1</sup> (% popln) | Satisfy <sup>2</sup> (% eligible) | Elsewhere <sup>3</sup> (% eligible) | Achieve <sup>4</sup> (% eligible) |                                                      |
| <b>Sentence Status</b> |                                                                                                                                                  |                                 |                                   |                                     |                                   |                                                      |
| 2017/18                | .                                                                                                                                                | 81                              | <10 <sup>6</sup>                  | <10 <sup>6</sup>                    | <10 <sup>6</sup>                  | <10 <sup>6</sup>                                     |
|                        | Absconded                                                                                                                                        | <10 <sup>6</sup>                | <10 <sup>6</sup>                  | <10 <sup>6</sup>                    | <10 <sup>6</sup>                  | <10 <sup>6</sup>                                     |
|                        | Active In                                                                                                                                        | 15,872                          | 49 (0.3)                          | 37 (75.5)                           | <10 <sup>6</sup>                  | 38 (77.6)                                            |
|                        | Active Out                                                                                                                                       | 1,052                           | <10 <sup>6</sup>                  | <10 <sup>6</sup>                    | <10 <sup>6</sup>                  | <10 <sup>6</sup>                                     |
|                        | Convicted Sentence                                                                                                                               | 2,125                           | <10 <sup>6</sup>                  | <10 <sup>6</sup>                    | <10 <sup>6</sup>                  | <10 <sup>6</sup>                                     |
|                        | Downgrade in security category                                                                                                                   | <10 <sup>6</sup>                | <10 <sup>6</sup>                  | <10 <sup>6</sup>                    | <10 <sup>6</sup>                  | <10 <sup>6</sup>                                     |
|                        | Internal Cell Move                                                                                                                               | <10 <sup>6</sup>                | <10 <sup>6</sup>                  | <10 <sup>6</sup>                    | <10 <sup>6</sup>                  | <10 <sup>6</sup>                                     |
|                        | Judges Remand                                                                                                                                    | 92                              | <10 <sup>6</sup>                  | <10 <sup>6</sup>                    | <10 <sup>6</sup>                  | <10 <sup>6</sup>                                     |
|                        | Licence Revoke                                                                                                                                   | 52                              | <10 <sup>6</sup>                  | <10 <sup>6</sup>                    | <10 <sup>6</sup>                  | <10 <sup>6</sup>                                     |
|                        | On Remand                                                                                                                                        | 1,492                           | <10 <sup>6</sup>                  | <10 <sup>6</sup>                    | <10 <sup>6</sup>                  | <10 <sup>6</sup>                                     |
|                        | Transfer                                                                                                                                         | 910                             | <10 <sup>6</sup>                  | <10 <sup>6</sup>                    | <10 <sup>6</sup>                  | <10 <sup>6</sup>                                     |
|                        | Upgrade in security category                                                                                                                     | <10 <sup>6</sup>                | <10 <sup>6</sup>                  | <10 <sup>6</sup>                    | <10 <sup>6</sup>                  | <10 <sup>6</sup>                                     |
| 2018/19                | .                                                                                                                                                | 88                              | <10 <sup>6</sup>                  | <10 <sup>6</sup>                    | <10 <sup>6</sup>                  | <10 <sup>6</sup>                                     |
|                        | Absconded                                                                                                                                        | <10 <sup>6</sup>                | <10 <sup>6</sup>                  | <10 <sup>6</sup>                    | <10 <sup>6</sup>                  | <10 <sup>6</sup>                                     |
|                        | Active In                                                                                                                                        | 18,145                          | 65 (0.4)                          | 43 (66.2)                           | <10 <sup>6</sup>                  | 45 (69.2)                                            |
|                        | Active Out                                                                                                                                       | 835                             | <10 <sup>6</sup>                  | <10 <sup>6</sup>                    | <10 <sup>6</sup>                  | <10 <sup>6</sup>                                     |
|                        | Convicted Sentence                                                                                                                               | 1,320                           | <10 <sup>6</sup>                  | <10 <sup>6</sup>                    | <10 <sup>6</sup>                  | <10 <sup>6</sup>                                     |
|                        | Downgrade in security category                                                                                                                   | <10 <sup>6</sup>                | <10 <sup>6</sup>                  | <10 <sup>6</sup>                    | <10 <sup>6</sup>                  | <10 <sup>6</sup>                                     |
|                        | Internal Cell Move                                                                                                                               | <10 <sup>6</sup>                | <10 <sup>6</sup>                  | <10 <sup>6</sup>                    | <10 <sup>6</sup>                  | <10 <sup>6</sup>                                     |
|                        | Judges Remand                                                                                                                                    | <10 <sup>6</sup>                | <10 <sup>6</sup>                  | <10 <sup>6</sup>                    | <10 <sup>6</sup>                  | <10 <sup>6</sup>                                     |
|                        | Licence Revoke                                                                                                                                   | 125                             | <10 <sup>6</sup>                  | <10 <sup>6</sup>                    | <10 <sup>6</sup>                  | <10 <sup>6</sup>                                     |
|                        | On Remand                                                                                                                                        | 1,059                           | <10 <sup>6</sup>                  | <10 <sup>6</sup>                    | <10 <sup>6</sup>                  | <10 <sup>6</sup>                                     |
|                        | Transfer                                                                                                                                         | 518                             | <10 <sup>6</sup>                  | <10 <sup>6</sup>                    | <10 <sup>6</sup>                  | <10 <sup>6</sup>                                     |
|                        | Upgrade in security category                                                                                                                     | <10 <sup>6</sup>                | <10 <sup>6</sup>                  | <10 <sup>6</sup>                    | <10 <sup>6</sup>                  | <10 <sup>6</sup>                                     |
| 2019/20                | .                                                                                                                                                | 69                              | <10 <sup>6</sup>                  | <10 <sup>6</sup>                    | <10 <sup>6</sup>                  | <10 <sup>6</sup>                                     |
|                        | Absconded                                                                                                                                        | <10 <sup>6</sup>                | <10 <sup>6</sup>                  | <10 <sup>6</sup>                    | <10 <sup>6</sup>                  | <10 <sup>6</sup>                                     |
|                        | Active In                                                                                                                                        | 22,424                          | 88 (0.4)                          | 55 (62.5)                           | <10 <sup>6</sup>                  | 56 (63.6)                                            |
|                        | Active Out                                                                                                                                       | 625                             | <10 <sup>6</sup>                  | <10 <sup>6</sup>                    | <10 <sup>6</sup>                  | <10 <sup>6</sup>                                     |
|                        | Convicted Sentence                                                                                                                               | 1,361                           | <10 <sup>6</sup>                  | <10 <sup>6</sup>                    | <10 <sup>6</sup>                  | <10 <sup>6</sup>                                     |
|                        | Downgrade in security category                                                                                                                   | <10 <sup>6</sup>                | <10 <sup>6</sup>                  | <10 <sup>6</sup>                    | <10 <sup>6</sup>                  | <10 <sup>6</sup>                                     |
|                        | Internal Cell Move                                                                                                                               | <10 <sup>6</sup>                | <10 <sup>6</sup>                  | <10 <sup>6</sup>                    | <10 <sup>6</sup>                  | <10 <sup>6</sup>                                     |
|                        | Judges Remand                                                                                                                                    | 19                              | <10 <sup>6</sup>                  | <10 <sup>6</sup>                    | <10 <sup>6</sup>                  | <10 <sup>6</sup>                                     |
|                        | Licence Revoke                                                                                                                                   | 178                             | <10 <sup>6</sup>                  | <10 <sup>6</sup>                    | <10 <sup>6</sup>                  | <10 <sup>6</sup>                                     |
|                        | On Remand                                                                                                                                        | 1,031                           | <10 <sup>6</sup>                  | <10 <sup>6</sup>                    | <10 <sup>6</sup>                  | <10 <sup>6</sup>                                     |
|                        | Transfer                                                                                                                                         | 101                             | <10 <sup>6</sup>                  | <10 <sup>6</sup>                    | <10 <sup>6</sup>                  | <10 <sup>6</sup>                                     |
|                        | Upgrade in security category                                                                                                                     | <10 <sup>6</sup>                | <10 <sup>6</sup>                  | <10 <sup>6</sup>                    | <10 <sup>6</sup>                  | <10 <sup>6</sup>                                     |
| <b>Age - years</b>     |                                                                                                                                                  |                                 |                                   |                                     |                                   |                                                      |
| 2017/18                | 10 - <20                                                                                                                                         | 468                             | <10 <sup>6</sup>                  | <10 <sup>6</sup>                    | <10 <sup>6</sup>                  | <10 <sup>6</sup>                                     |
|                        | 20 - <30                                                                                                                                         | 6,994                           | <10 <sup>6</sup>                  | <10 <sup>6</sup>                    | <10 <sup>6</sup>                  | <10 <sup>6</sup>                                     |
|                        | 30 - <40                                                                                                                                         | 7,051                           | <10 <sup>6</sup>                  | <10 <sup>6</sup>                    | <10 <sup>6</sup>                  | <10 <sup>6</sup>                                     |
|                        | 40 - <50                                                                                                                                         | 4,114                           | <10 <sup>6</sup>                  | <10 <sup>6</sup>                    | <10 <sup>6</sup>                  | <10 <sup>6</sup>                                     |
|                        | 50 - <60                                                                                                                                         | 2,107                           | 15 (0.7)                          | 14 (93.3)                           | <10 <sup>6</sup>                  | 14 (93.3)                                            |
|                        | 60 - <70                                                                                                                                         | 684                             | 16 (2.3)                          | 12 (75.0)                           | <10 <sup>6</sup>                  | 13 (81.3)                                            |
|                        | 70 - <80                                                                                                                                         | 213                             | 15 (7.0)                          | <10 <sup>6</sup>                    | <10 <sup>6</sup>                  | 10 (66.7)                                            |
|                        | 80 - <90                                                                                                                                         | 40                              | <10 <sup>6</sup>                  | <10 <sup>6</sup>                    | <10 <sup>6</sup>                  | <10 <sup>6</sup>                                     |
|                        | 90 - <100                                                                                                                                        | <10 <sup>6</sup>                | <10 <sup>6</sup>                  | <10 <sup>6</sup>                    | <10 <sup>6</sup>                  | <10 <sup>6</sup>                                     |
|                        | 100 - <110                                                                                                                                       | <10 <sup>6</sup>                | <10 <sup>6</sup>                  | <10 <sup>6</sup>                    | <10 <sup>6</sup>                  | <10 <sup>6</sup>                                     |
| 2018/19                | 10 - <20                                                                                                                                         | 436                             | <10 <sup>6</sup>                  | <10 <sup>6</sup>                    | <10 <sup>6</sup>                  | <10 <sup>6</sup>                                     |
|                        | 20 - <30                                                                                                                                         | 7,163                           | <10 <sup>6</sup>                  | <10 <sup>6</sup>                    | <10 <sup>6</sup>                  | <10 <sup>6</sup>                                     |
|                        | 30 - <40                                                                                                                                         | 7,381                           | <10 <sup>6</sup>                  | <10 <sup>6</sup>                    | <10 <sup>6</sup>                  | <10 <sup>6</sup>                                     |
|                        | 40 - <50                                                                                                                                         | 4,180                           | 13 (0.3)                          | <10 <sup>6</sup>                    | <10 <sup>6</sup>                  | <10 <sup>6</sup>                                     |
|                        | 50 - <60                                                                                                                                         | 1,978                           | 22 (1.1)                          | 19 (86.4)                           | <10 <sup>6</sup>                  | 19 (86.4)                                            |
|                        | 60 - <70                                                                                                                                         | 701                             | 14 (2.0)                          | <10 <sup>6</sup>                    | <10 <sup>6</sup>                  | <10 <sup>6</sup>                                     |
|                        | 70 - <80                                                                                                                                         | 209                             | 14 (6.7)                          | <10 <sup>6</sup>                    | <10 <sup>6</sup>                  | <10 <sup>6</sup>                                     |
|                        | 80 - <90                                                                                                                                         | 45                              | <10 <sup>6</sup>                  | <10 <sup>6</sup>                    | <10 <sup>6</sup>                  | <10 <sup>6</sup>                                     |
|                        | 90 - <100                                                                                                                                        | <10 <sup>6</sup>                | <10 <sup>6</sup>                  | <10 <sup>6</sup>                    | <10 <sup>6</sup>                  | <10 <sup>6</sup>                                     |
|                        | 100 - <110                                                                                                                                       | <10 <sup>6</sup>                | <10 <sup>6</sup>                  | <10 <sup>6</sup>                    | <10 <sup>6</sup>                  | <10 <sup>6</sup>                                     |
| 2019/20                | 10 - <20                                                                                                                                         | 404                             | <10 <sup>6</sup>                  | <10 <sup>6</sup>                    | <10 <sup>6</sup>                  | <10 <sup>6</sup>                                     |
|                        | 20 - <30                                                                                                                                         | 8,064                           | <10 <sup>6</sup>                  | <10 <sup>6</sup>                    | <10 <sup>6</sup>                  | <10 <sup>6</sup>                                     |
|                        | 30 - <40                                                                                                                                         | 9,125                           | <10 <sup>6</sup>                  | <10 <sup>6</sup>                    | <10 <sup>6</sup>                  | <10 <sup>6</sup>                                     |
|                        | 40 - <50                                                                                                                                         | 4,948                           | 14 (0.3)                          | <10 <sup>6</sup>                    | <10 <sup>6</sup>                  | <10 <sup>6</sup>                                     |
|                        | 50 - <60                                                                                                                                         | 2,224                           | 28 (1.3)                          | 18 (64.3)                           | <10 <sup>6</sup>                  | 18 (64.3)                                            |
|                        | 60 - <70                                                                                                                                         | 751                             | 21 (2.8)                          | 12 (57.1)                           | <10 <sup>6</sup>                  | 13 (61.9)                                            |
|                        | 70 - <80                                                                                                                                         | 238                             | 14 (5.9)                          | 11 (78.6)                           | <10 <sup>6</sup>                  | 11 (78.6)                                            |
|                        | 80 - <90                                                                                                                                         | 53                              | <10 <sup>6</sup>                  | <10 <sup>6</sup>                    | <10 <sup>6</sup>                  | <10 <sup>6</sup>                                     |
|                        | 90 - <100                                                                                                                                        | <10 <sup>6</sup>                | <10 <sup>6</sup>                  | <10 <sup>6</sup>                    | <10 <sup>6</sup>                  | <10 <sup>6</sup>                                     |
|                        | 100 - <110                                                                                                                                       | <10 <sup>6</sup>                | <10 <sup>6</sup>                  | <10 <sup>6</sup>                    | <10 <sup>6</sup>                  | <10 <sup>6</sup>                                     |

<sup>1</sup>Eligible for indicator; <sup>2</sup>Achieve in current prison; <sup>3</sup>Achieve in previous prison; <sup>4</sup>Overall achievement - either current or previous prison; <sup>5</sup>Declined indicator; <sup>6</sup>Suppressed (<10) to avoid disclosure

| <b>Indicator</b> <i>The proportion of people with heart failure who have been prescribed an ACE-inhibitor or angiotensin receptor blocker in the preceding 12 months</i><br><b>Group: Cardiovascular Disease</b> |                        |                                 |                                   |                                     |                                   | Community<br>achievement 2019/20:<br>81.95% (QOF 19/20) |
|------------------------------------------------------------------------------------------------------------------------------------------------------------------------------------------------------------------|------------------------|---------------------------------|-----------------------------------|-------------------------------------|-----------------------------------|---------------------------------------------------------|
| Variable                                                                                                                                                                                                         | Population             | Eligible <sup>1</sup> (% popln) | Satisfy <sup>2</sup> (% eligible) | Elsewhere <sup>3</sup> (% eligible) | Achieve <sup>4</sup> (% eligible) |                                                         |
| <b>Length of Stay (months)</b>                                                                                                                                                                                   |                        |                                 |                                   |                                     |                                   |                                                         |
| 2017/18                                                                                                                                                                                                          | <1                     | 4,474                           | <10 <sup>6</sup>                  | <10 <sup>6</sup>                    | <10 <sup>6</sup>                  | <10 <sup>6</sup>                                        |
|                                                                                                                                                                                                                  | 1-<6                   | 8,075                           | 15 (0.2)                          | 11 (73.3)                           | <10 <sup>6</sup>                  | 12 (80.0)                                               |
|                                                                                                                                                                                                                  | 6-<12                  | 3,672                           | <10 <sup>6</sup>                  | <10 <sup>6</sup>                    | <10 <sup>6</sup>                  | <10 <sup>6</sup>                                        |
|                                                                                                                                                                                                                  | 12-<24                 | 2,832                           | <10 <sup>6</sup>                  | <10 <sup>6</sup>                    | <10 <sup>6</sup>                  | <10 <sup>6</sup>                                        |
|                                                                                                                                                                                                                  | 24+                    | 2,624                           | 22 (0.8)                          | 15 (68.2)                           | <10 <sup>6</sup>                  | 15 (68.2)                                               |
| 2018/19                                                                                                                                                                                                          | <1                     | 4,801                           | <10 <sup>6</sup>                  | <10 <sup>6</sup>                    | <10 <sup>6</sup>                  | <10 <sup>6</sup>                                        |
|                                                                                                                                                                                                                  | 1-<6                   | 7,742                           | 16 (0.2)                          | <10 <sup>6</sup>                    | <10 <sup>6</sup>                  | <10 <sup>6</sup>                                        |
|                                                                                                                                                                                                                  | 6-<12                  | 3,616                           | 12 (0.3)                          | 11 (91.7)                           | <10 <sup>6</sup>                  | 11 (91.7)                                               |
|                                                                                                                                                                                                                  | 12-<24                 | 3,447                           | 15 (0.4)                          | 12 (80.0)                           | <10 <sup>6</sup>                  | 13 (86.7)                                               |
|                                                                                                                                                                                                                  | 24+                    | 2,493                           | 26 (1.0)                          | 15 (57.7)                           | <10 <sup>6</sup>                  | 15 (57.7)                                               |
| 2019/20                                                                                                                                                                                                          | <1                     | 5,745                           | <10 <sup>6</sup>                  | <10 <sup>6</sup>                    | <10 <sup>6</sup>                  | <10 <sup>6</sup>                                        |
|                                                                                                                                                                                                                  | 1-<6                   | 9,697                           | 26 (0.3)                          | 11 (42.3)                           | <10 <sup>6</sup>                  | 11 (42.3)                                               |
|                                                                                                                                                                                                                  | 6-<12                  | 5,090                           | 20 (0.4)                          | 13 (65.0)                           | <10 <sup>6</sup>                  | 14 (70.0)                                               |
|                                                                                                                                                                                                                  | 12-<24                 | 3,244                           | 24 (0.7)                          | 18 (75.0)                           | <10 <sup>6</sup>                  | 18 (75.0)                                               |
|                                                                                                                                                                                                                  | 24+                    | 2,035                           | 21 (1.0)                          | 13 (61.9)                           | <10 <sup>6</sup>                  | 13 (61.9)                                               |
| <b>Ethnic group</b>                                                                                                                                                                                              |                        |                                 |                                   |                                     |                                   |                                                         |
| 2017/18                                                                                                                                                                                                          | White                  | 15,638                          | 53 (0.3)                          | 39 (73.6)                           | <10 <sup>6</sup>                  | 41 (77.4)                                               |
|                                                                                                                                                                                                                  | Mixed                  | 431                             | <10 <sup>6</sup>                  | <10 <sup>6</sup>                    | <10 <sup>6</sup>                  | <10 <sup>6</sup>                                        |
|                                                                                                                                                                                                                  | Asian or Asian British | 813                             | <10 <sup>6</sup>                  | <10 <sup>6</sup>                    | <10 <sup>6</sup>                  | <10 <sup>6</sup>                                        |
|                                                                                                                                                                                                                  | Black or Black British | 404                             | <10 <sup>6</sup>                  | <10 <sup>6</sup>                    | <10 <sup>6</sup>                  | <10 <sup>6</sup>                                        |
|                                                                                                                                                                                                                  | Chinese and Other      | 214                             | <10 <sup>6</sup>                  | <10 <sup>6</sup>                    | <10 <sup>6</sup>                  | <10 <sup>6</sup>                                        |
|                                                                                                                                                                                                                  | Unclassified           | 372                             | <10 <sup>6</sup>                  | <10 <sup>6</sup>                    | <10 <sup>6</sup>                  | <10 <sup>6</sup>                                        |
| 2018/19                                                                                                                                                                                                          | White                  | 14,911                          | 63 (0.4)                          | 42 (66.7)                           | <10 <sup>6</sup>                  | 44 (69.8)                                               |
|                                                                                                                                                                                                                  | Mixed                  | 371                             | <10 <sup>6</sup>                  | <10 <sup>6</sup>                    | <10 <sup>6</sup>                  | <10 <sup>6</sup>                                        |
|                                                                                                                                                                                                                  | Asian or Asian British | 726                             | <10 <sup>6</sup>                  | <10 <sup>6</sup>                    | <10 <sup>6</sup>                  | <10 <sup>6</sup>                                        |
|                                                                                                                                                                                                                  | Black or Black British | 364                             | <10 <sup>6</sup>                  | <10 <sup>6</sup>                    | <10 <sup>6</sup>                  | <10 <sup>6</sup>                                        |
|                                                                                                                                                                                                                  | Chinese and Other      | 167                             | <10 <sup>6</sup>                  | <10 <sup>6</sup>                    | <10 <sup>6</sup>                  | <10 <sup>6</sup>                                        |
|                                                                                                                                                                                                                  | Unclassified           | 409                             | <10 <sup>6</sup>                  | <10 <sup>6</sup>                    | <10 <sup>6</sup>                  | <10 <sup>6</sup>                                        |
| 2019/20                                                                                                                                                                                                          | White                  | 16,606                          | 79 (0.5)                          | 47 (59.5)                           | <10 <sup>6</sup>                  | 48 (60.8)                                               |
|                                                                                                                                                                                                                  | Mixed                  | 409                             | <10 <sup>6</sup>                  | <10 <sup>6</sup>                    | <10 <sup>6</sup>                  | <10 <sup>6</sup>                                        |
|                                                                                                                                                                                                                  | Asian or Asian British | 755                             | <10 <sup>6</sup>                  | <10 <sup>6</sup>                    | <10 <sup>6</sup>                  | <10 <sup>6</sup>                                        |
|                                                                                                                                                                                                                  | Black or Black British | 451                             | <10 <sup>6</sup>                  | <10 <sup>6</sup>                    | <10 <sup>6</sup>                  | <10 <sup>6</sup>                                        |
|                                                                                                                                                                                                                  | Chinese and Other      | 163                             | <10 <sup>6</sup>                  | <10 <sup>6</sup>                    | <10 <sup>6</sup>                  | <10 <sup>6</sup>                                        |
|                                                                                                                                                                                                                  | Unclassified           | 387                             | <10 <sup>6</sup>                  | <10 <sup>6</sup>                    | <10 <sup>6</sup>                  | <10 <sup>6</sup>                                        |

<sup>1</sup>Eligible for indicator; <sup>2</sup>Achieve in current prison; <sup>3</sup>Achieve in previous prison; <sup>4</sup>Overall achievement - either current or previous prison; <sup>5</sup>Declined indicator; <sup>6</sup>Suppressed (<10) to avoid disclosure

| Indicator                     | The proportion of people with heart failure who have been prescribed an ACE-inhibitor or angiotensin receptor blocker, and a beta blocker, in the preceding 12 months |                                 |                                   |                                     |                                   | Community achievement 2019/20: 82.01% (QOF 19/20) |
|-------------------------------|-----------------------------------------------------------------------------------------------------------------------------------------------------------------------|---------------------------------|-----------------------------------|-------------------------------------|-----------------------------------|---------------------------------------------------|
| Group: Cardiovascular Disease |                                                                                                                                                                       |                                 |                                   |                                     |                                   |                                                   |
| Variable                      | Population                                                                                                                                                            | Eligible <sup>1</sup> (% popln) | Satisfy <sup>2</sup> (% eligible) | Elsewhere <sup>3</sup> (% eligible) | Achieve <sup>4</sup> (% eligible) |                                                   |
| <b>Year</b>                   |                                                                                                                                                                       |                                 |                                   |                                     |                                   |                                                   |
| 2017/18                       | 21,677                                                                                                                                                                | 44 (0.2)                        | 35 (79.5)                         | <10 <sup>6</sup>                    | 36 (81.8)                         |                                                   |
| 2018/19                       | 22,099                                                                                                                                                                | 50 (0.2)                        | 40 (80.0)                         | <10 <sup>6</sup>                    | 42 (84.0)                         |                                                   |
| 2019/20                       | 25,811                                                                                                                                                                | 61 (0.2)                        | 45 (73.8)                         | <10 <sup>6</sup>                    | 49 (80.3)                         |                                                   |
| <b>Prison</b>                 |                                                                                                                                                                       |                                 |                                   |                                     |                                   |                                                   |
| 2017/18                       | Prison 1                                                                                                                                                              | 1,323                           | <10 <sup>0</sup>                  | <10 <sup>0</sup>                    | <10 <sup>0</sup>                  | <10 <sup>0</sup>                                  |
|                               | Prison 2                                                                                                                                                              | 3,261                           | <10 <sup>0</sup>                  | <10 <sup>0</sup>                    | <10 <sup>0</sup>                  | <10 <sup>0</sup>                                  |
|                               | Prison 3                                                                                                                                                              | 2,623                           | <10 <sup>0</sup>                  | <10 <sup>0</sup>                    | <10 <sup>0</sup>                  | <10 <sup>0</sup>                                  |
|                               | Prison 4                                                                                                                                                              | 2,089                           | 10 (0.5)                          | <10 <sup>0</sup>                    | <10 <sup>0</sup>                  | <10 <sup>0</sup>                                  |
|                               | Prison 5                                                                                                                                                              | 637                             | <10 <sup>0</sup>                  | <10 <sup>0</sup>                    | <10 <sup>0</sup>                  | <10 <sup>0</sup>                                  |
|                               | Prison 6                                                                                                                                                              | 1,552                           | <10 <sup>0</sup>                  | <10 <sup>0</sup>                    | <10 <sup>0</sup>                  | <10 <sup>0</sup>                                  |
|                               | Prison 7                                                                                                                                                              | 635                             | <10 <sup>0</sup>                  | <10 <sup>0</sup>                    | <10 <sup>0</sup>                  | <10 <sup>0</sup>                                  |
|                               | Prison 8                                                                                                                                                              | 1,085                           | <10 <sup>0</sup>                  | <10 <sup>0</sup>                    | <10 <sup>0</sup>                  | <10 <sup>0</sup>                                  |
|                               | Prison 9                                                                                                                                                              | 981                             | <10 <sup>0</sup>                  | <10 <sup>0</sup>                    | <10 <sup>0</sup>                  | <10 <sup>0</sup>                                  |
|                               | Prison 10                                                                                                                                                             | 2,523                           | <10 <sup>0</sup>                  | <10 <sup>0</sup>                    | <10 <sup>0</sup>                  | <10 <sup>0</sup>                                  |
|                               | Prison 11                                                                                                                                                             | 3,470                           | <10 <sup>0</sup>                  | <10 <sup>0</sup>                    | <10 <sup>0</sup>                  | <10 <sup>0</sup>                                  |
|                               | Prison 12                                                                                                                                                             | 815                             | <10 <sup>0</sup>                  | <10 <sup>0</sup>                    | <10 <sup>0</sup>                  | <10 <sup>0</sup>                                  |
|                               | Prison 13                                                                                                                                                             | 683                             | <10 <sup>0</sup>                  | <10 <sup>0</sup>                    | <10 <sup>0</sup>                  | <10 <sup>0</sup>                                  |
| 2018/19                       | Prison 1                                                                                                                                                              | 1,333                           | <10 <sup>0</sup>                  | <10 <sup>0</sup>                    | <10 <sup>0</sup>                  | <10 <sup>0</sup>                                  |
|                               | Prison 2                                                                                                                                                              | 2,705                           | <10 <sup>0</sup>                  | <10 <sup>0</sup>                    | <10 <sup>0</sup>                  | <10 <sup>0</sup>                                  |
|                               | Prison 3                                                                                                                                                              | 2,522                           | 10 (0.4)                          | <10 <sup>0</sup>                    | <10 <sup>0</sup>                  | <10 <sup>0</sup>                                  |
|                               | Prison 4                                                                                                                                                              | 2,349                           | 13 (0.6)                          | 11 (84.6)                           | <10 <sup>0</sup>                  | 11 (84.6)                                         |
|                               | Prison 5                                                                                                                                                              | 676                             | <10 <sup>0</sup>                  | <10 <sup>0</sup>                    | <10 <sup>0</sup>                  | <10 <sup>0</sup>                                  |
|                               | Prison 6                                                                                                                                                              | 1,513                           | <10 <sup>0</sup>                  | <10 <sup>0</sup>                    | <10 <sup>0</sup>                  | <10 <sup>0</sup>                                  |
|                               | Prison 7                                                                                                                                                              | 654                             | <10 <sup>0</sup>                  | <10 <sup>0</sup>                    | <10 <sup>0</sup>                  | <10 <sup>0</sup>                                  |
|                               | Prison 8                                                                                                                                                              | 1,148                           | <10 <sup>0</sup>                  | <10 <sup>0</sup>                    | <10 <sup>0</sup>                  | <10 <sup>0</sup>                                  |
|                               | Prison 9                                                                                                                                                              | 996                             | <10 <sup>0</sup>                  | <10 <sup>0</sup>                    | <10 <sup>0</sup>                  | <10 <sup>0</sup>                                  |
|                               | Prison 10                                                                                                                                                             | 2,717                           | <10 <sup>0</sup>                  | <10 <sup>0</sup>                    | <10 <sup>0</sup>                  | <10 <sup>0</sup>                                  |
|                               | Prison 11                                                                                                                                                             | 4,020                           | <10 <sup>0</sup>                  | <10 <sup>0</sup>                    | <10 <sup>0</sup>                  | <10 <sup>0</sup>                                  |
|                               | Prison 12                                                                                                                                                             | 792                             | <10 <sup>0</sup>                  | <10 <sup>0</sup>                    | <10 <sup>0</sup>                  | <10 <sup>0</sup>                                  |
|                               | Prison 13                                                                                                                                                             | 674                             | <10 <sup>0</sup>                  | <10 <sup>0</sup>                    | <10 <sup>0</sup>                  | <10 <sup>0</sup>                                  |
| 2019/20                       | Prison 1                                                                                                                                                              | 1,410                           | <10 <sup>0</sup>                  | <10 <sup>0</sup>                    | <10 <sup>0</sup>                  | <10 <sup>0</sup>                                  |
|                               | Prison 2                                                                                                                                                              | 2,979                           | <10 <sup>0</sup>                  | <10 <sup>0</sup>                    | <10 <sup>0</sup>                  | <10 <sup>0</sup>                                  |
|                               | Prison 3                                                                                                                                                              | 2,809                           | 11 (0.4)                          | <10 <sup>0</sup>                    | <10 <sup>0</sup>                  | <10 <sup>0</sup>                                  |
|                               | Prison 4                                                                                                                                                              | 2,651                           | 12 (0.5)                          | 11 (91.7)                           | <10 <sup>0</sup>                  | 11 (91.7)                                         |
|                               | Prison 5                                                                                                                                                              | 616                             | <10 <sup>0</sup>                  | <10 <sup>0</sup>                    | <10 <sup>0</sup>                  | <10 <sup>0</sup>                                  |
|                               | Prison 6                                                                                                                                                              | 1,533                           | <10 <sup>0</sup>                  | <10 <sup>0</sup>                    | <10 <sup>0</sup>                  | <10 <sup>0</sup>                                  |
|                               | Prison 7                                                                                                                                                              | 860                             | <10 <sup>0</sup>                  | <10 <sup>0</sup>                    | <10 <sup>0</sup>                  | <10 <sup>0</sup>                                  |
|                               | Prison 8                                                                                                                                                              | 1,385                           | <10 <sup>0</sup>                  | <10 <sup>0</sup>                    | <10 <sup>0</sup>                  | <10 <sup>0</sup>                                  |
|                               | Prison 9                                                                                                                                                              | 1,092                           | <10 <sup>0</sup>                  | <10 <sup>0</sup>                    | <10 <sup>0</sup>                  | <10 <sup>0</sup>                                  |
|                               | Prison 10                                                                                                                                                             | 3,577                           | 11 (0.3)                          | <10 <sup>0</sup>                    | <10 <sup>0</sup>                  | <10 <sup>0</sup>                                  |
|                               | Prison 11                                                                                                                                                             | 5,348                           | <10 <sup>0</sup>                  | <10 <sup>0</sup>                    | <10 <sup>0</sup>                  | <10 <sup>0</sup>                                  |
|                               | Prison 12                                                                                                                                                             | 805                             | <10 <sup>0</sup>                  | <10 <sup>0</sup>                    | <10 <sup>0</sup>                  | <10 <sup>0</sup>                                  |
|                               | Prison 13                                                                                                                                                             | 746                             | <10 <sup>0</sup>                  | <10 <sup>0</sup>                    | <10 <sup>0</sup>                  | <10 <sup>0</sup>                                  |
| <b>Prison category</b>        |                                                                                                                                                                       |                                 |                                   |                                     |                                   |                                                   |
| 2017/18                       | A                                                                                                                                                                     | 1,664                           | <10 <sup>0</sup>                  | <10 <sup>0</sup>                    | <10 <sup>0</sup>                  | <10 <sup>0</sup>                                  |
|                               | B                                                                                                                                                                     | 9,254                           | 14 (0.2)                          | 11 (78.6)                           | <10 <sup>0</sup>                  | 11 (78.6)                                         |
|                               | C                                                                                                                                                                     | 6,035                           | 19 (0.3)                          | 16 (84.2)                           | <10 <sup>0</sup>                  | 16 (84.2)                                         |
|                               | Closed                                                                                                                                                                | 1,720                           | <10 <sup>0</sup>                  | <10 <sup>0</sup>                    | <10 <sup>0</sup>                  | <10 <sup>0</sup>                                  |
|                               | D                                                                                                                                                                     | 2,189                           | <10 <sup>0</sup>                  | <10 <sup>0</sup>                    | <10 <sup>0</sup>                  | <10 <sup>0</sup>                                  |
|                               | YOI                                                                                                                                                                   | 815                             | <10 <sup>0</sup>                  | <10 <sup>0</sup>                    | <10 <sup>0</sup>                  | <10 <sup>0</sup>                                  |
| 2018/19                       | A                                                                                                                                                                     | 1,670                           | <10 <sup>0</sup>                  | <10 <sup>0</sup>                    | <10 <sup>0</sup>                  | <10 <sup>0</sup>                                  |
|                               | B                                                                                                                                                                     | 9,442                           | 14 (0.1)                          | 12 (85.7)                           | <10 <sup>0</sup>                  | 12 (85.7)                                         |
|                               | C                                                                                                                                                                     | 6,204                           | 24 (0.4)                          | 19 (79.2)                           | <10 <sup>0</sup>                  | 19 (79.2)                                         |
|                               | Closed                                                                                                                                                                | 1,802                           | <10 <sup>0</sup>                  | <10 <sup>0</sup>                    | <10 <sup>0</sup>                  | <10 <sup>0</sup>                                  |
|                               | D                                                                                                                                                                     | 2,189                           | <10 <sup>0</sup>                  | <10 <sup>0</sup>                    | <10 <sup>0</sup>                  | <10 <sup>0</sup>                                  |
|                               | YOI                                                                                                                                                                   | 792                             | <10 <sup>0</sup>                  | <10 <sup>0</sup>                    | <10 <sup>0</sup>                  | <10 <sup>0</sup>                                  |
| 2019/20                       | A                                                                                                                                                                     | 1,838                           | <10 <sup>0</sup>                  | <10 <sup>0</sup>                    | <10 <sup>0</sup>                  | <10 <sup>0</sup>                                  |
|                               | B                                                                                                                                                                     | 11,904                          | 23 (0.2)                          | 16 (69.6)                           | <10 <sup>0</sup>                  | 18 (78.3)                                         |
|                               | C                                                                                                                                                                     | 6,870                           | 24 (0.3)                          | 16 (66.7)                           | <10 <sup>0</sup>                  | 17 (70.8)                                         |
|                               | Closed                                                                                                                                                                | 2,245                           | <10 <sup>0</sup>                  | <10 <sup>0</sup>                    | <10 <sup>0</sup>                  | <10 <sup>0</sup>                                  |
|                               | D                                                                                                                                                                     | 2,149                           | <10 <sup>0</sup>                  | <10 <sup>0</sup>                    | <10 <sup>0</sup>                  | <10 <sup>0</sup>                                  |
|                               | YOI                                                                                                                                                                   | 805                             | <10 <sup>0</sup>                  | <10 <sup>0</sup>                    | <10 <sup>0</sup>                  | <10 <sup>0</sup>                                  |
| <b>Gender</b>                 |                                                                                                                                                                       |                                 |                                   |                                     |                                   |                                                   |
| 2017/18                       | F                                                                                                                                                                     | 1,699                           | <10 <sup>0</sup>                  | <10 <sup>0</sup>                    | <10 <sup>0</sup>                  | <10 <sup>0</sup>                                  |
|                               | M                                                                                                                                                                     | 19,977                          | 43 (0.2)                          | 34 (79.1)                           | <10 <sup>0</sup>                  | 35 (81.4)                                         |
| 2018/19                       | F                                                                                                                                                                     | 1,802                           | <10 <sup>0</sup>                  | <10 <sup>0</sup>                    | <10 <sup>0</sup>                  | <10 <sup>0</sup>                                  |
|                               | M                                                                                                                                                                     | 20,295                          | 49 (0.2)                          | 40 (81.6)                           | <10 <sup>0</sup>                  | 41 (83.7)                                         |
| 2019/20                       | F                                                                                                                                                                     | 1,376                           | <10 <sup>0</sup>                  | <10 <sup>0</sup>                    | <10 <sup>0</sup>                  | <10 <sup>0</sup>                                  |
|                               | M                                                                                                                                                                     | 23,570                          | 59 (0.3)                          | 43 (72.9)                           | <10 <sup>0</sup>                  | 47 (79.7)                                         |

<sup>1</sup>Eligible for indicator; <sup>2</sup>Achieve in current prison; <sup>3</sup>Achieve in previous prison; <sup>4</sup>Overall achievement - either current or previous prison; <sup>5</sup>Declined indicator; <sup>6</sup>Suppressed (<10) to avoid disclosure

Indicator *The proportion of people with heart failure who have been prescribed an ACE-inhibitor or angiotensin receptor blocker, and a beta blocker, in the preceding 12 months*

Group: Cardiovascular Disease

| Variable                       | Population       | Eligible <sup>1</sup> (% popln) | Satisfy <sup>2</sup> (% eligible) | Elsewhere <sup>3</sup> (% eligible) | Achieve <sup>4</sup> (% eligible) |
|--------------------------------|------------------|---------------------------------|-----------------------------------|-------------------------------------|-----------------------------------|
| <b>Sentence Status</b>         |                  |                                 |                                   |                                     |                                   |
| 2017/18                        | .                |                                 |                                   |                                     |                                   |
| Absconded                      | <10 <sup>0</sup> | <10 <sup>0</sup>                | <10 <sup>0</sup>                  | <10 <sup>0</sup>                    | <10 <sup>0</sup>                  |
| Active In                      | 15,872           | 37 (0.2)                        | 29 (78.4)                         | <10 <sup>0</sup>                    | 30 (81.1)                         |
| Active Out                     | 1,052            | <10 <sup>0</sup>                | <10 <sup>0</sup>                  | <10 <sup>0</sup>                    | <10 <sup>0</sup>                  |
| Convicted Sentence             | 2,125            | <10 <sup>0</sup>                | <10 <sup>0</sup>                  | <10 <sup>0</sup>                    | <10 <sup>0</sup>                  |
| Downgrade in security category | <10 <sup>0</sup> | <10 <sup>0</sup>                | <10 <sup>0</sup>                  | <10 <sup>0</sup>                    | <10 <sup>0</sup>                  |
| Internal Cell Move             | <10 <sup>0</sup> | <10 <sup>0</sup>                | <10 <sup>0</sup>                  | <10 <sup>0</sup>                    | <10 <sup>0</sup>                  |
| Judges Remand                  | 92               | <10 <sup>0</sup>                | <10 <sup>0</sup>                  | <10 <sup>0</sup>                    | <10 <sup>0</sup>                  |
| Licence Revoke                 | 52               | <10 <sup>0</sup>                | <10 <sup>0</sup>                  | <10 <sup>0</sup>                    | <10 <sup>0</sup>                  |
| On Remand                      | 1,492            | <10 <sup>0</sup>                | <10 <sup>0</sup>                  | <10 <sup>0</sup>                    | <10 <sup>0</sup>                  |
| Transfer                       | 910              | <10 <sup>0</sup>                | <10 <sup>0</sup>                  | <10 <sup>0</sup>                    | <10 <sup>0</sup>                  |
| Upgrade in security category   | <10 <sup>0</sup> | <10 <sup>0</sup>                | <10 <sup>0</sup>                  | <10 <sup>0</sup>                    | <10 <sup>0</sup>                  |
| 2018/19                        | .                |                                 |                                   |                                     |                                   |
| Absconded                      | <10 <sup>0</sup> | <10 <sup>0</sup>                | <10 <sup>0</sup>                  | <10 <sup>0</sup>                    | <10 <sup>0</sup>                  |
| Active In                      | 18,145           | 43 (0.2)                        | 34 (79.1)                         | <10 <sup>0</sup>                    | 36 (83.7)                         |
| Active Out                     | 835              | <10 <sup>0</sup>                | <10 <sup>0</sup>                  | <10 <sup>0</sup>                    | <10 <sup>0</sup>                  |
| Convicted Sentence             | 1,320            | <10 <sup>0</sup>                | <10 <sup>0</sup>                  | <10 <sup>0</sup>                    | <10 <sup>0</sup>                  |
| Downgrade in security category | <10 <sup>0</sup> | <10 <sup>0</sup>                | <10 <sup>0</sup>                  | <10 <sup>0</sup>                    | <10 <sup>0</sup>                  |
| Internal Cell Move             | <10 <sup>0</sup> | <10 <sup>0</sup>                | <10 <sup>0</sup>                  | <10 <sup>0</sup>                    | <10 <sup>0</sup>                  |
| Judges Remand                  | <10 <sup>0</sup> | <10 <sup>0</sup>                | <10 <sup>0</sup>                  | <10 <sup>0</sup>                    | <10 <sup>0</sup>                  |
| Licence Revoke                 | 125              | <10 <sup>0</sup>                | <10 <sup>0</sup>                  | <10 <sup>0</sup>                    | <10 <sup>0</sup>                  |
| On Remand                      | 1,059            | <10 <sup>0</sup>                | <10 <sup>0</sup>                  | <10 <sup>0</sup>                    | <10 <sup>0</sup>                  |
| Transfer                       | 518              | <10 <sup>0</sup>                | <10 <sup>0</sup>                  | <10 <sup>0</sup>                    | <10 <sup>0</sup>                  |
| Upgrade in security category   | <10 <sup>0</sup> | <10 <sup>0</sup>                | <10 <sup>0</sup>                  | <10 <sup>0</sup>                    | <10 <sup>0</sup>                  |
| 2019/20                        | .                |                                 |                                   |                                     |                                   |
| Absconded                      | <10 <sup>0</sup> | <10 <sup>0</sup>                | <10 <sup>0</sup>                  | <10 <sup>0</sup>                    | <10 <sup>0</sup>                  |
| Active In                      | 22,424           | 55 (0.2)                        | 39 (70.9)                         | <10 <sup>0</sup>                    | 43 (78.2)                         |
| Active Out                     | 625              | <10 <sup>0</sup>                | <10 <sup>0</sup>                  | <10 <sup>0</sup>                    | <10 <sup>0</sup>                  |
| Convicted Sentence             | 1,361            | <10 <sup>0</sup>                | <10 <sup>0</sup>                  | <10 <sup>0</sup>                    | <10 <sup>0</sup>                  |
| Downgrade in security category | <10 <sup>0</sup> | <10 <sup>0</sup>                | <10 <sup>0</sup>                  | <10 <sup>0</sup>                    | <10 <sup>0</sup>                  |
| Internal Cell Move             | <10 <sup>0</sup> | <10 <sup>0</sup>                | <10 <sup>0</sup>                  | <10 <sup>0</sup>                    | <10 <sup>0</sup>                  |
| Judges Remand                  | 19               | <10 <sup>0</sup>                | <10 <sup>0</sup>                  | <10 <sup>0</sup>                    | <10 <sup>0</sup>                  |
| Licence Revoke                 | 178              | <10 <sup>0</sup>                | <10 <sup>0</sup>                  | <10 <sup>0</sup>                    | <10 <sup>0</sup>                  |
| On Remand                      | 1,031            | <10 <sup>0</sup>                | <10 <sup>0</sup>                  | <10 <sup>0</sup>                    | <10 <sup>0</sup>                  |
| Transfer                       | 101              | <10 <sup>0</sup>                | <10 <sup>0</sup>                  | <10 <sup>0</sup>                    | <10 <sup>0</sup>                  |
| Upgrade in security category   | <10 <sup>0</sup> | <10 <sup>0</sup>                | <10 <sup>0</sup>                  | <10 <sup>0</sup>                    | <10 <sup>0</sup>                  |
| <b>Age - years</b>             |                  |                                 |                                   |                                     |                                   |
| 2017/18                        |                  |                                 |                                   |                                     |                                   |
| 10 - <20                       | 468              | <10 <sup>0</sup>                | <10 <sup>0</sup>                  | <10 <sup>0</sup>                    | <10 <sup>0</sup>                  |
| 20 - <30                       | 6,994            | <10 <sup>0</sup>                | <10 <sup>0</sup>                  | <10 <sup>0</sup>                    | <10 <sup>0</sup>                  |
| 30 - <40                       | 7,051            | <10 <sup>0</sup>                | <10 <sup>0</sup>                  | <10 <sup>0</sup>                    | <10 <sup>0</sup>                  |
| 40 - <50                       | 4,114            | <10 <sup>0</sup>                | <10 <sup>0</sup>                  | <10 <sup>0</sup>                    | <10 <sup>0</sup>                  |
| 50 - <60                       | 2,107            | 14 (0.7)                        | <10 <sup>0</sup>                  | <10 <sup>0</sup>                    | 10 (71.4)                         |
| 60 - <70                       | 684              | 12 (1.8)                        | 10 (83.3)                         | <10 <sup>0</sup>                    | 10 (83.3)                         |
| 70 - <80                       | 213              | <10 <sup>0</sup>                | <10 <sup>0</sup>                  | <10 <sup>0</sup>                    | <10 <sup>0</sup>                  |
| 80 - <90                       | 40               | <10 <sup>0</sup>                | <10 <sup>0</sup>                  | <10 <sup>0</sup>                    | <10 <sup>0</sup>                  |
| 90 - <100                      | <10 <sup>0</sup> | <10 <sup>0</sup>                | <10 <sup>0</sup>                  | <10 <sup>0</sup>                    | <10 <sup>0</sup>                  |
| 100 - <110                     | <10 <sup>0</sup> | <10 <sup>0</sup>                | <10 <sup>0</sup>                  | <10 <sup>0</sup>                    | <10 <sup>0</sup>                  |
| 2018/19                        |                  |                                 |                                   |                                     |                                   |
| 10 - <20                       | 436              | <10 <sup>0</sup>                | <10 <sup>0</sup>                  | <10 <sup>0</sup>                    | <10 <sup>0</sup>                  |
| 20 - <30                       | 7,163            | <10 <sup>0</sup>                | <10 <sup>0</sup>                  | <10 <sup>0</sup>                    | <10 <sup>0</sup>                  |
| 30 - <40                       | 7,381            | <10 <sup>0</sup>                | <10 <sup>0</sup>                  | <10 <sup>0</sup>                    | <10 <sup>0</sup>                  |
| 40 - <50                       | 4,180            | <10 <sup>0</sup>                | <10 <sup>0</sup>                  | <10 <sup>0</sup>                    | <10 <sup>0</sup>                  |
| 50 - <60                       | 1,978            | 19 (1.0)                        | 13 (68.4)                         | <10 <sup>0</sup>                    | 14 (73.7)                         |
| 60 - <70                       | 701              | <10 <sup>0</sup>                | <10 <sup>0</sup>                  | <10 <sup>0</sup>                    | <10 <sup>0</sup>                  |
| 70 - <80                       | 209              | <10 <sup>0</sup>                | <10 <sup>0</sup>                  | <10 <sup>0</sup>                    | <10 <sup>0</sup>                  |
| 80 - <90                       | 45               | <10 <sup>0</sup>                | <10 <sup>0</sup>                  | <10 <sup>0</sup>                    | <10 <sup>0</sup>                  |
| 90 - <100                      | <10 <sup>0</sup> | <10 <sup>0</sup>                | <10 <sup>0</sup>                  | <10 <sup>0</sup>                    | <10 <sup>0</sup>                  |
| 100 - <110                     | <10 <sup>0</sup> | <10 <sup>0</sup>                | <10 <sup>0</sup>                  | <10 <sup>0</sup>                    | <10 <sup>0</sup>                  |
| 2019/20                        |                  |                                 |                                   |                                     |                                   |
| 10 - <20                       | 404              | <10 <sup>0</sup>                | <10 <sup>0</sup>                  | <10 <sup>0</sup>                    | <10 <sup>0</sup>                  |
| 20 - <30                       | 8,064            | <10 <sup>0</sup>                | <10 <sup>0</sup>                  | <10 <sup>0</sup>                    | <10 <sup>0</sup>                  |
| 30 - <40                       | 9,125            | <10 <sup>0</sup>                | <10 <sup>0</sup>                  | <10 <sup>0</sup>                    | <10 <sup>0</sup>                  |
| 40 - <50                       | 4,948            | <10 <sup>0</sup>                | <10 <sup>0</sup>                  | <10 <sup>0</sup>                    | <10 <sup>0</sup>                  |
| 50 - <60                       | 2,224            | 18 (0.8)                        | 15 (83.3)                         | <10 <sup>0</sup>                    | 16 (88.9)                         |
| 60 - <70                       | 751              | 12 (1.6)                        | <10 <sup>0</sup>                  | <10 <sup>0</sup>                    | 10 (83.3)                         |
| 70 - <80                       | 238              | 11 (4.6)                        | <10 <sup>0</sup>                  | <10 <sup>0</sup>                    | <10 <sup>0</sup>                  |
| 80 - <90                       | 53               | <10 <sup>0</sup>                | <10 <sup>0</sup>                  | <10 <sup>0</sup>                    | <10 <sup>0</sup>                  |
| 90 - <100                      | <10 <sup>0</sup> | <10 <sup>0</sup>                | <10 <sup>0</sup>                  | <10 <sup>0</sup>                    | <10 <sup>0</sup>                  |
| 100 - <110                     | <10 <sup>0</sup> | <10 <sup>0</sup>                | <10 <sup>0</sup>                  | <10 <sup>0</sup>                    | <10 <sup>0</sup>                  |

<sup>1</sup>Eligible for indicator; <sup>2</sup>Achieve in current prison; <sup>3</sup>Achieve in previous prison; <sup>4</sup>Overall achievement - either current or previous prison; <sup>5</sup>Declined indicator; <sup>6</sup>Suppressed (<10) to avoid disclosure

Indicator *The proportion of people with heart failure who have been prescribed an ACE-inhibitor or angiotensin receptor blocker, and a beta blocker, in the preceding 12 months*

Group: Cardiovascular Disease

| Variable                       | Population | Eligible <sup>1</sup> (% popln) | Satisfy <sup>2</sup> (% eligible) | Elsewhere <sup>3</sup> (% eligible) | Achieve <sup>4</sup> (% eligible) |
|--------------------------------|------------|---------------------------------|-----------------------------------|-------------------------------------|-----------------------------------|
| <b>Length of Stay (months)</b> |            |                                 |                                   |                                     |                                   |
| 2017/18 <1                     | 4,474      | <10 <sup>6</sup>                | <10 <sup>6</sup>                  | <10 <sup>6</sup>                    | <10 <sup>6</sup>                  |
| 1-<6                           | 8,075      | 11 (0.1)                        | 11 (100.0)                        | <10 <sup>6</sup>                    | 11 (100.0)                        |
| 6-<12                          | 3,672      | <10 <sup>6</sup>                | <10 <sup>6</sup>                  | <10 <sup>6</sup>                    | <10 <sup>6</sup>                  |
| 12-<24                         | 2,832      | <10 <sup>6</sup>                | <10 <sup>6</sup>                  | <10 <sup>6</sup>                    | <10 <sup>6</sup>                  |
| 24+                            | 2,624      | 15 (0.6)                        | 11 (73.3)                         | <10 <sup>6</sup>                    | 11 (73.3)                         |
| 2018/19 <1                     | 4,801      | <10 <sup>6</sup>                | <10 <sup>6</sup>                  | <10 <sup>6</sup>                    | <10 <sup>6</sup>                  |
| 1-<6                           | 7,742      | <10 <sup>6</sup>                | <10 <sup>6</sup>                  | <10 <sup>6</sup>                    | <10 <sup>6</sup>                  |
| 6-<12                          | 3,616      | 11 (0.3)                        | 10 (90.9)                         | <10 <sup>6</sup>                    | 10 (90.9)                         |
| 12-<24                         | 3,447      | 12 (0.3)                        | <10 <sup>6</sup>                  | <10 <sup>6</sup>                    | 10 (83.3)                         |
| 24+                            | 2,493      | 15 (0.6)                        | 10 (66.7)                         | <10 <sup>6</sup>                    | 10 (66.7)                         |
| 2019/20 <1                     | 5,745      | <10 <sup>6</sup>                | <10 <sup>6</sup>                  | <10 <sup>6</sup>                    | <10 <sup>6</sup>                  |
| 1-<6                           | 9,697      | 11 (0.1)                        | <10 <sup>6</sup>                  | <10 <sup>6</sup>                    | <10 <sup>6</sup>                  |
| 6-<12                          | 5,090      | 13 (0.3)                        | 10 (76.9)                         | <10 <sup>6</sup>                    | 11 (84.6)                         |
| 12-<24                         | 3,244      | 18 (0.6)                        | 14 (77.8)                         | <10 <sup>6</sup>                    | 16 (88.9)                         |
| 24+                            | 2,035      | 13 (0.6)                        | 11 (84.6)                         | <10 <sup>6</sup>                    | 11 (84.6)                         |
| <b>Ethnic Group</b>            |            |                                 |                                   |                                     |                                   |
| 2017/18 White                  | 15,638     | 39 (0.2)                        | 32 (82.1)                         | <10 <sup>6</sup>                    | 32 (82.1)                         |
| Mixed                          | 431        | <10 <sup>6</sup>                | <10 <sup>6</sup>                  | <10 <sup>6</sup>                    | <10 <sup>6</sup>                  |
| Asian or Asian British         | 813        | <10 <sup>6</sup>                | <10 <sup>6</sup>                  | <10 <sup>6</sup>                    | <10 <sup>6</sup>                  |
| Black or Black British         | 404        | <10 <sup>6</sup>                | <10 <sup>6</sup>                  | <10 <sup>6</sup>                    | <10 <sup>6</sup>                  |
| Chinese and Other              | 214        | <10 <sup>6</sup>                | <10 <sup>6</sup>                  | <10 <sup>6</sup>                    | <10 <sup>6</sup>                  |
| Unclassified                   | 372        | <10 <sup>6</sup>                | <10 <sup>6</sup>                  | <10 <sup>6</sup>                    | <10 <sup>6</sup>                  |
| 2018/19 White                  | 14,911     | 42 (0.3)                        | 33 (78.6)                         | <10 <sup>6</sup>                    | 35 (83.3)                         |
| Mixed                          | 371        | <10 <sup>6</sup>                | <10 <sup>6</sup>                  | <10 <sup>6</sup>                    | <10 <sup>6</sup>                  |
| Asian or Asian British         | 726        | <10 <sup>6</sup>                | <10 <sup>6</sup>                  | <10 <sup>6</sup>                    | <10 <sup>6</sup>                  |
| Black or Black British         | 364        | <10 <sup>6</sup>                | <10 <sup>6</sup>                  | <10 <sup>6</sup>                    | <10 <sup>6</sup>                  |
| Chinese and Other              | 167        | <10 <sup>6</sup>                | <10 <sup>6</sup>                  | <10 <sup>6</sup>                    | <10 <sup>6</sup>                  |
| Unclassified                   | 409        | <10 <sup>6</sup>                | <10 <sup>6</sup>                  | <10 <sup>6</sup>                    | <10 <sup>6</sup>                  |
| 2019/20 White                  | 16,606     | 47 (0.3)                        | 34 (72.3)                         | <10 <sup>6</sup>                    | 38 (80.9)                         |
| Mixed                          | 409        | <10 <sup>6</sup>                | <10 <sup>6</sup>                  | <10 <sup>6</sup>                    | <10 <sup>6</sup>                  |
| Asian or Asian British         | 755        | <10 <sup>6</sup>                | <10 <sup>6</sup>                  | <10 <sup>6</sup>                    | <10 <sup>6</sup>                  |
| Black or Black British         | 451        | <10 <sup>6</sup>                | <10 <sup>6</sup>                  | <10 <sup>6</sup>                    | <10 <sup>6</sup>                  |
| Chinese and Other              | 163        | <10 <sup>6</sup>                | <10 <sup>6</sup>                  | <10 <sup>6</sup>                    | <10 <sup>6</sup>                  |
| Unclassified                   | 387        | <10 <sup>6</sup>                | <10 <sup>6</sup>                  | <10 <sup>6</sup>                    | <10 <sup>6</sup>                  |

<sup>1</sup>Eligible for indicator; <sup>2</sup>Achieve in current prison; <sup>3</sup>Achieve in previous prison; <sup>4</sup>Overall achievement - either current or previous prison; <sup>5</sup>Declined indicator; <sup>6</sup>Suppressed (<10) to avoid disclosure

| The proportion of women eligible for screening and aged 25-49 years who have had cervical screening in the preceding five years and six months |           |            |                                 |                                    |                                   |                                     | Community achievement<br>2019/20: 71.48% (QOF<br>19/20) |
|------------------------------------------------------------------------------------------------------------------------------------------------|-----------|------------|---------------------------------|------------------------------------|-----------------------------------|-------------------------------------|---------------------------------------------------------|
| Group: Screening                                                                                                                               |           |            |                                 |                                    |                                   |                                     |                                                         |
| Indicator                                                                                                                                      | Variable  | Population | Eligible <sup>1</sup> (% popln) | Declined <sup>5</sup> (% eligible) | Satisfy <sup>2</sup> (% eligible) | Elsewhere <sup>3</sup> (% eligible) | Achieve <sup>4</sup> (% eligible)                       |
| <b>Year</b>                                                                                                                                    |           |            |                                 |                                    |                                   |                                     |                                                         |
|                                                                                                                                                | 2017/18   | 21,677     | 1,294 (6.0)                     | 85 (6.6)                           | 629 (48.6)                        | 90 (7.0)                            | 719 (55.6)                                              |
|                                                                                                                                                | 2018/19   | 22,099     | 1,411 (6.4)                     | 81 (5.7)                           | 835 (59.2)                        | 85 (6.0)                            | 920 (65.2)                                              |
|                                                                                                                                                | 2019/20   | 25,811     | 1,796 (7.0)                     | 80 (4.5)                           | 972 (54.1)                        | 173 (9.6)                           | 1,145 (63.8)                                            |
| <b>Prison</b>                                                                                                                                  |           |            |                                 |                                    |                                   |                                     |                                                         |
| 2017/18                                                                                                                                        | Prison 1  | 1,323      | <10 <sup>6</sup>                | <10 <sup>6</sup>                   | <10 <sup>6</sup>                  | <10 <sup>6</sup>                    | <10 <sup>6</sup>                                        |
|                                                                                                                                                | Prison 2  | 3,261      | <10 <sup>6</sup>                | <10 <sup>6</sup>                   | <10 <sup>6</sup>                  | <10 <sup>6</sup>                    | <10 <sup>6</sup>                                        |
|                                                                                                                                                | Prison 3  | 2,623      | <10 <sup>6</sup>                | <10 <sup>6</sup>                   | <10 <sup>6</sup>                  | <10 <sup>6</sup>                    | <10 <sup>6</sup>                                        |
|                                                                                                                                                | Prison 4  | 2,089      | <10 <sup>6</sup>                | <10 <sup>6</sup>                   | <10 <sup>6</sup>                  | <10 <sup>6</sup>                    | <10 <sup>6</sup>                                        |
|                                                                                                                                                | Prison 5  | 637        | <10 <sup>6</sup>                | <10 <sup>6</sup>                   | <10 <sup>6</sup>                  | <10 <sup>6</sup>                    | <10 <sup>6</sup>                                        |
|                                                                                                                                                | Prison 6  | 1,552      | <10 <sup>6</sup>                | <10 <sup>6</sup>                   | <10 <sup>6</sup>                  | <10 <sup>6</sup>                    | <10 <sup>6</sup>                                        |
|                                                                                                                                                | Prison 7  | 635        | 491 (77.3)                      | 40 (8.1)                           | 252 (51.3)                        | 52 (10.6)                           | 304 (61.9)                                              |
|                                                                                                                                                | Prison 8  | 1,085      | 800 (73.7)                      | 45 (5.6)                           | 377 (47.1)                        | 38 (4.8)                            | 415 (51.9)                                              |
|                                                                                                                                                | Prison 9  | 981        | <10 <sup>6</sup>                | <10 <sup>6</sup>                   | <10 <sup>6</sup>                  | <10 <sup>6</sup>                    | <10 <sup>6</sup>                                        |
|                                                                                                                                                | Prison 10 | 2,523      | <10 <sup>6</sup>                | <10 <sup>6</sup>                   | <10 <sup>6</sup>                  | <10 <sup>6</sup>                    | <10 <sup>6</sup>                                        |
|                                                                                                                                                | Prison 11 | 3,470      | <10 <sup>6</sup>                | <10 <sup>6</sup>                   | <10 <sup>6</sup>                  | <10 <sup>6</sup>                    | <10 <sup>6</sup>                                        |
|                                                                                                                                                | Prison 12 | 815        | <10 <sup>6</sup>                | <10 <sup>6</sup>                   | <10 <sup>6</sup>                  | <10 <sup>6</sup>                    | <10 <sup>6</sup>                                        |
|                                                                                                                                                | Prison 13 | 683        | <10 <sup>6</sup>                | <10 <sup>6</sup>                   | <10 <sup>6</sup>                  | <10 <sup>6</sup>                    | <10 <sup>6</sup>                                        |
| 2018/19                                                                                                                                        | Prison 1  | 1,333      | <10 <sup>6</sup>                | <10 <sup>6</sup>                   | <10 <sup>6</sup>                  | <10 <sup>6</sup>                    | <10 <sup>6</sup>                                        |
|                                                                                                                                                | Prison 2  | 2,705      | <10 <sup>6</sup>                | <10 <sup>6</sup>                   | <10 <sup>6</sup>                  | <10 <sup>6</sup>                    | <10 <sup>6</sup>                                        |
|                                                                                                                                                | Prison 3  | 2,522      | <10 <sup>6</sup>                | <10 <sup>6</sup>                   | <10 <sup>6</sup>                  | <10 <sup>6</sup>                    | <10 <sup>6</sup>                                        |
|                                                                                                                                                | Prison 4  | 2,349      | <10 <sup>6</sup>                | <10 <sup>6</sup>                   | <10 <sup>6</sup>                  | <10 <sup>6</sup>                    | <10 <sup>6</sup>                                        |
|                                                                                                                                                | Prison 5  | 676        | <10 <sup>6</sup>                | <10 <sup>6</sup>                   | <10 <sup>6</sup>                  | <10 <sup>6</sup>                    | <10 <sup>6</sup>                                        |
|                                                                                                                                                | Prison 6  | 1,513      | <10 <sup>6</sup>                | <10 <sup>6</sup>                   | <10 <sup>6</sup>                  | <10 <sup>6</sup>                    | <10 <sup>6</sup>                                        |
|                                                                                                                                                | Prison 7  | 654        | 515 (78.7)                      | 37 (7.2)                           | 280 (54.4)                        | 59 (11.5)                           | 339 (65.8)                                              |
|                                                                                                                                                | Prison 8  | 1,148      | 887 (77.3)                      | 44 (5.0)                           | 555 (62.6)                        | 26 (2.9)                            | 581 (65.5)                                              |
|                                                                                                                                                | Prison 9  | 996        | <10 <sup>6</sup>                | <10 <sup>6</sup>                   | <10 <sup>6</sup>                  | <10 <sup>6</sup>                    | <10 <sup>6</sup>                                        |
|                                                                                                                                                | Prison 10 | 2,717      | <10 <sup>6</sup>                | <10 <sup>6</sup>                   | <10 <sup>6</sup>                  | <10 <sup>6</sup>                    | <10 <sup>6</sup>                                        |
|                                                                                                                                                | Prison 11 | 4,020      | <10 <sup>6</sup>                | <10 <sup>6</sup>                   | <10 <sup>6</sup>                  | <10 <sup>6</sup>                    | <10 <sup>6</sup>                                        |
|                                                                                                                                                | Prison 12 | 792        | <10 <sup>6</sup>                | <10 <sup>6</sup>                   | <10 <sup>6</sup>                  | <10 <sup>6</sup>                    | <10 <sup>6</sup>                                        |
|                                                                                                                                                | Prison 13 | 674        | <10 <sup>6</sup>                | <10 <sup>6</sup>                   | <10 <sup>6</sup>                  | <10 <sup>6</sup>                    | <10 <sup>6</sup>                                        |
| 2019/20                                                                                                                                        | Prison 1  | 1,410      | <10 <sup>6</sup>                | <10 <sup>6</sup>                   | <10 <sup>6</sup>                  | <10 <sup>6</sup>                    | <10 <sup>6</sup>                                        |
|                                                                                                                                                | Prison 2  | 2,979      | <10 <sup>6</sup>                | <10 <sup>6</sup>                   | <10 <sup>6</sup>                  | <10 <sup>6</sup>                    | <10 <sup>6</sup>                                        |
|                                                                                                                                                | Prison 3  | 2,809      | <10 <sup>6</sup>                | <10 <sup>6</sup>                   | <10 <sup>6</sup>                  | <10 <sup>6</sup>                    | <10 <sup>6</sup>                                        |
|                                                                                                                                                | Prison 4  | 2,651      | <10 <sup>6</sup>                | <10 <sup>6</sup>                   | <10 <sup>6</sup>                  | <10 <sup>6</sup>                    | <10 <sup>6</sup>                                        |
|                                                                                                                                                | Prison 5  | 616        | <10 <sup>6</sup>                | <10 <sup>6</sup>                   | <10 <sup>6</sup>                  | <10 <sup>6</sup>                    | <10 <sup>6</sup>                                        |
|                                                                                                                                                | Prison 6  | 1,533      | <10 <sup>6</sup>                | <10 <sup>6</sup>                   | <10 <sup>6</sup>                  | <10 <sup>6</sup>                    | <10 <sup>6</sup>                                        |
|                                                                                                                                                | Prison 7  | 860        | 688 (80.0)                      | 35 (5.1)                           | 262 (38.1)                        | 128 (18.6)                          | 390 (56.7)                                              |
|                                                                                                                                                | Prison 8  | 1,385      | 1,099 (79.4)                    | 45 (4.1)                           | 710 (64.6)                        | 45 (4.1)                            | 755 (68.7)                                              |
|                                                                                                                                                | Prison 9  | 1,092      | <10 <sup>6</sup>                | <10 <sup>6</sup>                   | <10 <sup>6</sup>                  | <10 <sup>6</sup>                    | <10 <sup>6</sup>                                        |
|                                                                                                                                                | Prison 10 | 3,577      | <10 <sup>6</sup>                | <10 <sup>6</sup>                   | <10 <sup>6</sup>                  | <10 <sup>6</sup>                    | <10 <sup>6</sup>                                        |
|                                                                                                                                                | Prison 11 | 5,348      | <10 <sup>6</sup>                | <10 <sup>6</sup>                   | <10 <sup>6</sup>                  | <10 <sup>6</sup>                    | <10 <sup>6</sup>                                        |
|                                                                                                                                                | Prison 12 | 805        | <10 <sup>6</sup>                | <10 <sup>6</sup>                   | <10 <sup>6</sup>                  | <10 <sup>6</sup>                    | <10 <sup>6</sup>                                        |
|                                                                                                                                                | Prison 13 | 746        | <10 <sup>6</sup>                | <10 <sup>6</sup>                   | <10 <sup>6</sup>                  | <10 <sup>6</sup>                    | <10 <sup>6</sup>                                        |
| <b>Prison category</b>                                                                                                                         |           |            |                                 |                                    |                                   |                                     |                                                         |
| 2017/18                                                                                                                                        | A         | 1,664      | <10 <sup>6</sup>                | <10 <sup>6</sup>                   | <10 <sup>6</sup>                  | <10 <sup>6</sup>                    | <10 <sup>6</sup>                                        |
|                                                                                                                                                | B         | 9,254      | <10 <sup>6</sup>                | <10 <sup>6</sup>                   | <10 <sup>6</sup>                  | <10 <sup>6</sup>                    | <10 <sup>6</sup>                                        |
|                                                                                                                                                | C         | 6,035      | <10 <sup>6</sup>                | <10 <sup>6</sup>                   | <10 <sup>6</sup>                  | <10 <sup>6</sup>                    | <10 <sup>6</sup>                                        |
|                                                                                                                                                | Closed    | 1,720      | 1,291 (75.1)                    | 85 (6.6)                           | 629 (48.7)                        | 90 (7.0)                            | 719 (55.7)                                              |
|                                                                                                                                                | D         | 2,189      | <10 <sup>6</sup>                | <10 <sup>6</sup>                   | <10 <sup>6</sup>                  | <10 <sup>6</sup>                    | <10 <sup>6</sup>                                        |
|                                                                                                                                                | YOI       | 815        | <10 <sup>6</sup>                | <10 <sup>6</sup>                   | <10 <sup>6</sup>                  | <10 <sup>6</sup>                    | <10 <sup>6</sup>                                        |
| 2018/19                                                                                                                                        | A         | 1,670      | <10 <sup>6</sup>                | <10 <sup>6</sup>                   | <10 <sup>6</sup>                  | <10 <sup>6</sup>                    | <10 <sup>6</sup>                                        |
|                                                                                                                                                | C         | 6,204      | <10 <sup>6</sup>                | <10 <sup>6</sup>                   | <10 <sup>6</sup>                  | <10 <sup>6</sup>                    | <10 <sup>6</sup>                                        |
|                                                                                                                                                | Closed    | 1,802      | 1,402 (77.8)                    | 81 (5.8)                           | 835 (59.6)                        | 85 (6.1)                            | 920 (65.6)                                              |
|                                                                                                                                                | D         | 2,189      | <10 <sup>6</sup>                | <10 <sup>6</sup>                   | <10 <sup>6</sup>                  | <10 <sup>6</sup>                    | <10 <sup>6</sup>                                        |
|                                                                                                                                                | YOI       | 792        | <10 <sup>6</sup>                | <10 <sup>6</sup>                   | <10 <sup>6</sup>                  | <10 <sup>6</sup>                    | <10 <sup>6</sup>                                        |
| 2019/20                                                                                                                                        | A         | 1,838      | <10 <sup>6</sup>                | <10 <sup>6</sup>                   | <10 <sup>6</sup>                  | <10 <sup>6</sup>                    | <10 <sup>6</sup>                                        |
|                                                                                                                                                | C         | 6,870      | <10 <sup>6</sup>                | <10 <sup>6</sup>                   | <10 <sup>6</sup>                  | <10 <sup>6</sup>                    | <10 <sup>6</sup>                                        |
|                                                                                                                                                | Closed    | 2,245      | 1,787 (79.6)                    | 80 (4.5)                           | 972 (54.4)                        | 173 (9.7)                           | 1,145 (64.1)                                            |
|                                                                                                                                                | D         | 2,149      | <10 <sup>6</sup>                | <10 <sup>6</sup>                   | <10 <sup>6</sup>                  | <10 <sup>6</sup>                    | <10 <sup>6</sup>                                        |
|                                                                                                                                                | YOI       | 805        | <10 <sup>6</sup>                | <10 <sup>6</sup>                   | <10 <sup>6</sup>                  | <10 <sup>6</sup>                    | <10 <sup>6</sup>                                        |
| <b>Gender</b>                                                                                                                                  |           |            |                                 |                                    |                                   |                                     |                                                         |
| 2017/18                                                                                                                                        | F         | 1,699      | 1,294 (76.2)                    | 85 (6.6)                           | 629 (48.6)                        | 90 (7.0)                            | 719 (55.6)                                              |
|                                                                                                                                                | M         | 19,977     | 0 (0.0)                         | 0 (0.0)                            | 0 (0.0)                           | 0 (0.0)                             | 0 (0.0)                                                 |
| 2018/19                                                                                                                                        | F         | 1,802      | 1,411 (78.3)                    | 81 (5.7)                           | 835 (59.2)                        | 85 (6.0)                            | 920 (65.2)                                              |
|                                                                                                                                                | M         | 20,295     | 0 (0.0)                         | 0 (0.0)                            | 0 (0.0)                           | 0 (0.0)                             | 0 (0.0)                                                 |
| 2019/20                                                                                                                                        | F         | 1,376      | 1,100 (79.9)                    | 45 (4.1)                           | 710 (64.5)                        | 45 (4.1)                            | 755 (68.6)                                              |
|                                                                                                                                                | M         | 23,570     | 0 (0.0)                         | 0 (0.0)                            | 0 (0.0)                           | 0 (0.0)                             | 0 (0.0)                                                 |

<sup>1</sup>Eligible for indicator; <sup>2</sup>Achieve in current prison; <sup>3</sup>Achieve in previous prison; <sup>4</sup>Overall achievement - either current or previous prison; <sup>5</sup>Declined indicator; <sup>6</sup>Suppressed (<10) to avoid disclosure



| The proportion of women eligible for screening and aged 25-49 years who have had cervical screening in the preceding five years and six months |                                |                  |                                 |                                    |                                   |                                     | Community achievement<br>2019/20: 71.48% (QOF<br>19/20) |                  |
|------------------------------------------------------------------------------------------------------------------------------------------------|--------------------------------|------------------|---------------------------------|------------------------------------|-----------------------------------|-------------------------------------|---------------------------------------------------------|------------------|
| Group: Screening                                                                                                                               |                                |                  |                                 |                                    |                                   |                                     |                                                         |                  |
| Indicator                                                                                                                                      | Variable                       | Population       | Eligible <sup>1</sup> (% popln) | Declined <sup>5</sup> (% eligible) | Satisfy <sup>2</sup> (% eligible) | Elsewhere <sup>3</sup> (% eligible) | Achieve <sup>4</sup> (% eligible)                       |                  |
| <b>Sentence Status</b>                                                                                                                         |                                |                  |                                 |                                    |                                   |                                     |                                                         |                  |
| 2017/18                                                                                                                                        | .                              | 81               | <10 <sup>6</sup>                | <10 <sup>6</sup>                   | <10 <sup>6</sup>                  | <10 <sup>6</sup>                    | <10 <sup>6</sup>                                        |                  |
|                                                                                                                                                | Absconded                      | <10 <sup>0</sup> | <10 <sup>6</sup>                | <10 <sup>6</sup>                   | <10 <sup>6</sup>                  | <10 <sup>6</sup>                    | <10 <sup>6</sup>                                        |                  |
|                                                                                                                                                | Active In                      | 15,872           | 1,138 (7.2)                     | 80 (7.0)                           | 560 (49.2)                        | 83 (7.3)                            | 643 (56.5)                                              |                  |
|                                                                                                                                                | Active Out                     | 1,052            | 94 (8.9)                        | <10 <sup>6</sup>                   | 45 (47.9)                         | <10 <sup>6</sup>                    | 49 (52.1)                                               |                  |
|                                                                                                                                                | Convicted Sentence             | 2,125            | 36 (1.7)                        | <10 <sup>6</sup>                   | 13 (36.1)                         | <10 <sup>6</sup>                    | 16 (44.4)                                               |                  |
|                                                                                                                                                | Downgrade in security category | <10 <sup>0</sup> | <10 <sup>6</sup>                | <10 <sup>6</sup>                   | <10 <sup>6</sup>                  | <10 <sup>6</sup>                    | <10 <sup>6</sup>                                        |                  |
|                                                                                                                                                | Internal Cell Move             | <10 <sup>0</sup> | <10 <sup>6</sup>                | <10 <sup>6</sup>                   | <10 <sup>6</sup>                  | <10 <sup>6</sup>                    | <10 <sup>6</sup>                                        |                  |
|                                                                                                                                                | Judges Remand                  | 92               | <10 <sup>6</sup>                | <10 <sup>6</sup>                   | <10 <sup>6</sup>                  | <10 <sup>6</sup>                    | <10 <sup>6</sup>                                        |                  |
|                                                                                                                                                | Licence Revoke                 | 52               | <10 <sup>6</sup>                | <10 <sup>6</sup>                   | <10 <sup>6</sup>                  | <10 <sup>6</sup>                    | <10 <sup>6</sup>                                        |                  |
|                                                                                                                                                | On Remand                      | 1,492            | 21 (1.4)                        | <10 <sup>6</sup>                   | <10 <sup>6</sup>                  | <10 <sup>6</sup>                    | <10 <sup>6</sup>                                        |                  |
|                                                                                                                                                | Transfer                       | 910              | <10 <sup>6</sup>                | <10 <sup>6</sup>                   | <10 <sup>6</sup>                  | <10 <sup>6</sup>                    | <10 <sup>6</sup>                                        |                  |
|                                                                                                                                                | Upgrade in security category   | <10 <sup>0</sup> | <10 <sup>6</sup>                | <10 <sup>6</sup>                   | <10 <sup>6</sup>                  | <10 <sup>6</sup>                    | <10 <sup>6</sup>                                        |                  |
|                                                                                                                                                | 2018/19                        | .                | 88                              | <10 <sup>6</sup>                   | <10 <sup>6</sup>                  | <10 <sup>6</sup>                    | <10 <sup>6</sup>                                        | <10 <sup>6</sup> |
|                                                                                                                                                |                                | Absconded        | <10 <sup>0</sup>                | <10 <sup>6</sup>                   | <10 <sup>6</sup>                  | <10 <sup>6</sup>                    | <10 <sup>6</sup>                                        | <10 <sup>6</sup> |
| Active In                                                                                                                                      |                                | 18,145           | 1,262 (7.0)                     | 75 (5.9)                           | 765 (60.6)                        | 81 (6.4)                            | 846 (67.0)                                              |                  |
| Active Out                                                                                                                                     |                                | 835              | 90 (10.8)                       | <10 <sup>6</sup>                   | 46 (51.1)                         | <10 <sup>6</sup>                    | 49 (54.4)                                               |                  |
| Convicted Sentence                                                                                                                             |                                | 1,320            | 36 (2.7)                        | <10 <sup>6</sup>                   | 16 (44.4)                         | <10 <sup>6</sup>                    | 17 (47.2)                                               |                  |
| Downgrade in security category                                                                                                                 |                                | <10 <sup>0</sup> | <10 <sup>6</sup>                | <10 <sup>6</sup>                   | <10 <sup>6</sup>                  | <10 <sup>6</sup>                    | <10 <sup>6</sup>                                        |                  |
| Internal Cell Move                                                                                                                             |                                | <10 <sup>0</sup> | <10 <sup>6</sup>                | <10 <sup>6</sup>                   | <10 <sup>6</sup>                  | <10 <sup>6</sup>                    | <10 <sup>6</sup>                                        |                  |
| Judges Remand                                                                                                                                  |                                | <10 <sup>0</sup> | <10 <sup>6</sup>                | <10 <sup>6</sup>                   | <10 <sup>6</sup>                  | <10 <sup>6</sup>                    | <10 <sup>6</sup>                                        |                  |
| Licence Revoke                                                                                                                                 |                                | 125              | <10 <sup>6</sup>                | <10 <sup>6</sup>                   | <10 <sup>6</sup>                  | <10 <sup>6</sup>                    | <10 <sup>6</sup>                                        |                  |
| On Remand                                                                                                                                      |                                | 1,059            | 14 (1.3)                        | <10 <sup>6</sup>                   | <10 <sup>6</sup>                  | <10 <sup>6</sup>                    | <10 <sup>6</sup>                                        |                  |
| Transfer                                                                                                                                       |                                | 518              | <10 <sup>6</sup>                | <10 <sup>6</sup>                   | <10 <sup>6</sup>                  | <10 <sup>6</sup>                    | <10 <sup>6</sup>                                        |                  |
| Upgrade in security category                                                                                                                   |                                | <10 <sup>0</sup> | <10 <sup>6</sup>                | <10 <sup>6</sup>                   | <10 <sup>6</sup>                  | <10 <sup>6</sup>                    | <10 <sup>6</sup>                                        |                  |
| 2019/20                                                                                                                                        |                                | .                | 69                              | <10 <sup>6</sup>                   | <10 <sup>6</sup>                  | <10 <sup>6</sup>                    | <10 <sup>6</sup>                                        | <10 <sup>6</sup> |
|                                                                                                                                                |                                | Absconded        | <10 <sup>0</sup>                | <10 <sup>6</sup>                   | <10 <sup>6</sup>                  | <10 <sup>6</sup>                    | <10 <sup>6</sup>                                        | <10 <sup>6</sup> |
|                                                                                                                                                | Active In                      | 22,424           | 1,650 (7.4)                     | 76 (4.6)                           | 910 (55.2)                        | 167 (10.1)                          | 1,077 (65.3)                                            |                  |
|                                                                                                                                                | Active Out                     | 625              | 104 (16.6)                      | <10 <sup>6</sup>                   | 48 (46.2)                         | <10 <sup>6</sup>                    | 52 (50.0)                                               |                  |
|                                                                                                                                                | Convicted Sentence             | 1,361            | 16 (1.2)                        | <10 <sup>6</sup>                   | <10 <sup>6</sup>                  | <10 <sup>6</sup>                    | <10 <sup>6</sup>                                        |                  |
|                                                                                                                                                | Downgrade in security category | <10 <sup>0</sup> | <10 <sup>6</sup>                | <10 <sup>6</sup>                   | <10 <sup>6</sup>                  | <10 <sup>6</sup>                    | <10 <sup>6</sup>                                        |                  |
|                                                                                                                                                | Internal Cell Move             | <10 <sup>0</sup> | <10 <sup>6</sup>                | <10 <sup>6</sup>                   | <10 <sup>6</sup>                  | <10 <sup>6</sup>                    | <10 <sup>6</sup>                                        |                  |
|                                                                                                                                                | Judges Remand                  | 19               | <10 <sup>6</sup>                | <10 <sup>6</sup>                   | <10 <sup>6</sup>                  | <10 <sup>6</sup>                    | <10 <sup>6</sup>                                        |                  |
|                                                                                                                                                | Licence Revoke                 | 178              | <10 <sup>6</sup>                | <10 <sup>6</sup>                   | <10 <sup>6</sup>                  | <10 <sup>6</sup>                    | <10 <sup>6</sup>                                        |                  |
|                                                                                                                                                | On Remand                      | 1,031            | 15 (1.5)                        | <10 <sup>6</sup>                   | <10 <sup>6</sup>                  | <10 <sup>6</sup>                    | <10 <sup>6</sup>                                        |                  |
|                                                                                                                                                | Transfer                       | 101              | <10 <sup>6</sup>                | <10 <sup>6</sup>                   | <10 <sup>6</sup>                  | <10 <sup>6</sup>                    | <10 <sup>6</sup>                                        |                  |
|                                                                                                                                                | Upgrade in security category   | <10 <sup>0</sup> | <10 <sup>6</sup>                | <10 <sup>6</sup>                   | <10 <sup>6</sup>                  | <10 <sup>6</sup>                    | <10 <sup>6</sup>                                        |                  |
|                                                                                                                                                | <b>Age - years</b>             |                  |                                 |                                    |                                   |                                     |                                                         |                  |
|                                                                                                                                                | 2017/18                        | 10 - <20         | 468                             | <10 <sup>6</sup>                   | <10 <sup>6</sup>                  | <10 <sup>6</sup>                    | <10 <sup>6</sup>                                        | <10 <sup>6</sup> |
| 20 - <30                                                                                                                                       |                                | 6,994            | 229 (3.3)                       | 14 (6.1)                           | 107 (46.7)                        | 18 (7.9)                            | 125 (54.6)                                              |                  |
| 30 - <40                                                                                                                                       |                                | 7,051            | 615 (8.7)                       | 35 (5.7)                           | 306 (49.8)                        | 49 (8.0)                            | 355 (57.7)                                              |                  |
| 40 - <50                                                                                                                                       |                                | 4,114            | 425 (10.3)                      | 35 (8.2)                           | 204 (48.0)                        | 23 (5.4)                            | 227 (53.4)                                              |                  |
| 50 - <60                                                                                                                                       |                                | 2,107            | 25 (1.2)                        | <10 <sup>6</sup>                   | 12 (48.0)                         | <10 <sup>6</sup>                    | 12 (48.0)                                               |                  |
| 60 - <70                                                                                                                                       |                                | 684              | <10 <sup>6</sup>                | <10 <sup>6</sup>                   | <10 <sup>6</sup>                  | <10 <sup>6</sup>                    | <10 <sup>6</sup>                                        |                  |
| 70 - <80                                                                                                                                       |                                | 213              | <10 <sup>6</sup>                | <10 <sup>6</sup>                   | <10 <sup>6</sup>                  | <10 <sup>6</sup>                    | <10 <sup>6</sup>                                        |                  |
| 80 - <90                                                                                                                                       |                                | 40               | <10 <sup>6</sup>                | <10 <sup>6</sup>                   | <10 <sup>6</sup>                  | <10 <sup>6</sup>                    | <10 <sup>6</sup>                                        |                  |
| 90 - <100                                                                                                                                      |                                | <10 <sup>0</sup> | <10 <sup>6</sup>                | <10 <sup>6</sup>                   | <10 <sup>6</sup>                  | <10 <sup>6</sup>                    | <10 <sup>6</sup>                                        |                  |
| 100 - <110                                                                                                                                     |                                | <10 <sup>0</sup> | <10 <sup>6</sup>                | <10 <sup>6</sup>                   | <10 <sup>6</sup>                  | <10 <sup>6</sup>                    | <10 <sup>6</sup>                                        |                  |
| 2018/19                                                                                                                                        | 10 - <20                       | 436              | <10 <sup>6</sup>                | <10 <sup>6</sup>                   | <10 <sup>6</sup>                  | <10 <sup>6</sup>                    | <10 <sup>6</sup>                                        |                  |
|                                                                                                                                                | 20 - <30                       | 7,163            | 245 (3.4)                       | 16 (6.5)                           | 123 (50.2)                        | 12 (4.9)                            | 135 (55.1)                                              |                  |
|                                                                                                                                                | 30 - <40                       | 7,381            | 650 (8.8)                       | 30 (4.6)                           | 404 (62.2)                        | 41 (6.3)                            | 445 (68.5)                                              |                  |
|                                                                                                                                                | 40 - <50                       | 4,180            | 474 (11.3)                      | 30 (6.3)                           | 289 (61.0)                        | 27 (5.7)                            | 316 (66.7)                                              |                  |
|                                                                                                                                                | 50 - <60                       | 1,978            | 42 (2.1)                        | <10 <sup>6</sup>                   | 19 (45.2)                         | <10 <sup>6</sup>                    | 24 (57.1)                                               |                  |
|                                                                                                                                                | 60 - <70                       | 701              | <10 <sup>6</sup>                | <10 <sup>6</sup>                   | <10 <sup>6</sup>                  | <10 <sup>6</sup>                    | <10 <sup>6</sup>                                        |                  |
|                                                                                                                                                | 70 - <80                       | 209              | <10 <sup>6</sup>                | <10 <sup>6</sup>                   | <10 <sup>6</sup>                  | <10 <sup>6</sup>                    | <10 <sup>6</sup>                                        |                  |
|                                                                                                                                                | 80 - <90                       | 45               | <10 <sup>6</sup>                | <10 <sup>6</sup>                   | <10 <sup>6</sup>                  | <10 <sup>6</sup>                    | <10 <sup>6</sup>                                        |                  |
|                                                                                                                                                | 90 - <100                      | <10 <sup>0</sup> | <10 <sup>6</sup>                | <10 <sup>6</sup>                   | <10 <sup>6</sup>                  | <10 <sup>6</sup>                    | <10 <sup>6</sup>                                        |                  |
|                                                                                                                                                | 100 - <110                     | <10 <sup>0</sup> | <10 <sup>6</sup>                | <10 <sup>6</sup>                   | <10 <sup>6</sup>                  | <10 <sup>6</sup>                    | <10 <sup>6</sup>                                        |                  |
| 2019/20                                                                                                                                        | 10 - <20                       | 404              | <10 <sup>6</sup>                | <10 <sup>6</sup>                   | <10 <sup>6</sup>                  | <10 <sup>6</sup>                    | <10 <sup>6</sup>                                        |                  |
|                                                                                                                                                | 20 - <30                       | 8,064            | 296 (3.7)                       | 13 (4.4)                           | 122 (41.2)                        | 25 (8.4)                            | 147 (49.7)                                              |                  |
|                                                                                                                                                | 30 - <40                       | 9,125            | 894 (9.8)                       | 32 (3.6)                           | 512 (57.3)                        | 83 (9.3)                            | 595 (66.6)                                              |                  |
|                                                                                                                                                | 40 - <50                       | 4,948            | 581 (11.7)                      | 33 (5.7)                           | 323 (55.6)                        | 62 (10.7)                           | 385 (66.3)                                              |                  |
|                                                                                                                                                | 50 - <60                       | 2,224            | 25 (1.1)                        | <10 <sup>6</sup>                   | 15 (60.0)                         | <10 <sup>6</sup>                    | 18 (72.0)                                               |                  |
|                                                                                                                                                | 60 - <70                       | 751              | <10 <sup>6</sup>                | <10 <sup>6</sup>                   | <10 <sup>6</sup>                  | <10 <sup>6</sup>                    | <10 <sup>6</sup>                                        |                  |
|                                                                                                                                                | 70 - <80                       | 238              | <10 <sup>6</sup>                | <10 <sup>6</sup>                   | <10 <sup>6</sup>                  | <10 <sup>6</sup>                    | <10 <sup>6</sup>                                        |                  |
|                                                                                                                                                | 80 - <90                       | 53               | <10 <sup>6</sup>                | <10 <sup>6</sup>                   | <10 <sup>6</sup>                  | <10 <sup>6</sup>                    | <10 <sup>6</sup>                                        |                  |
|                                                                                                                                                | 90 - <100                      | <10 <sup>0</sup> | <10 <sup>6</sup>                | <10 <sup>6</sup>                   | <10 <sup>6</sup>                  | <10 <sup>6</sup>                    | <10 <sup>6</sup>                                        |                  |
|                                                                                                                                                | 100 - <110                     | <10 <sup>0</sup> | <10 <sup>6</sup>                | <10 <sup>6</sup>                   | <10 <sup>6</sup>                  | <10 <sup>6</sup>                    | <10 <sup>6</sup>                                        |                  |

<sup>1</sup>Eligible for indicator; <sup>2</sup>Achieve in current prison; <sup>3</sup>Achieve in previous prison; <sup>4</sup>Overall achievement - either current or previous prison; <sup>5</sup>Declined indicator; <sup>6</sup>Suppressed (<10) to avoid disclosure

| <i>The proportion of women eligible for screening and aged 25-49 years who have had cervical screening in the preceding five years and six months</i> |                        |            |                                 |                                    |                                   |                                     | Community achievement<br>2019/20: 71.48% (QOF<br>19/20) |
|-------------------------------------------------------------------------------------------------------------------------------------------------------|------------------------|------------|---------------------------------|------------------------------------|-----------------------------------|-------------------------------------|---------------------------------------------------------|
| Group: Screening                                                                                                                                      |                        |            |                                 |                                    |                                   |                                     |                                                         |
| Indicator                                                                                                                                             | Variable               | Population | Eligible <sup>1</sup> (% popln) | Declined <sup>5</sup> (% eligible) | Satisfy <sup>2</sup> (% eligible) | Elsewhere <sup>3</sup> (% eligible) | Achieve <sup>4</sup> (% eligible)                       |
| <b>Length of Stay (months)</b>                                                                                                                        |                        |            |                                 |                                    |                                   |                                     |                                                         |
| 2017/18                                                                                                                                               | <1                     | 4,474      | 282 (6.3)                       | 18 (6.4)                           | 96 (34.0)                         | 12 (4.3)                            | 108 (38.3)                                              |
|                                                                                                                                                       | 1-<6                   | 8,075      | 535 (6.6)                       | 40 (7.5)                           | 231 (43.2)                        | 44 (8.2)                            | 275 (51.4)                                              |
|                                                                                                                                                       | 6-<12                  | 3,672      | 181 (4.9)                       | 12 (6.6)                           | 110 (60.8)                        | 13 (7.2)                            | 123 (68.0)                                              |
|                                                                                                                                                       | 12-<24                 | 2,832      | 158 (5.6)                       | <10 <sup>6</sup>                   | 97 (61.4)                         | 14 (8.9)                            | 111 (70.3)                                              |
|                                                                                                                                                       | 24+                    | 2,624      | 138 (5.3)                       | <10 <sup>6</sup>                   | 95 (68.8)                         | <10 <sup>6</sup>                    | 102 (73.9)                                              |
| 2018/19                                                                                                                                               | <1                     | 4,801      | 335 (7.0)                       | 15 (4.5)                           | 160 (47.8)                        | 17 (5.1)                            | 177 (52.8)                                              |
|                                                                                                                                                       | 1-<6                   | 7,742      | 561 (7.2)                       | 30 (5.3)                           | 311 (55.4)                        | 41 (7.3)                            | 352 (62.7)                                              |
|                                                                                                                                                       | 6-<12                  | 3,616      | 197 (5.4)                       | 18 (9.1)                           | 136 (69.0)                        | 10 (5.1)                            | 146 (74.1)                                              |
|                                                                                                                                                       | 12-<24                 | 3,447      | 182 (5.3)                       | <10 <sup>6</sup>                   | 126 (69.2)                        | 14 (7.7)                            | 140 (76.9)                                              |
|                                                                                                                                                       | 24+                    | 2,493      | 136 (5.5)                       | <10 <sup>6</sup>                   | 102 (75.0)                        | <10 <sup>6</sup>                    | 105 (77.2)                                              |
| 2019/20                                                                                                                                               | <1                     | 5,745      | 436 (7.6)                       | 18 (4.1)                           | 200 (45.9)                        | 28 (6.4)                            | 228 (52.3)                                              |
|                                                                                                                                                       | 1-<6                   | 9,697      | 751 (7.7)                       | 33 (4.4)                           | 377 (50.2)                        | 73 (9.7)                            | 450 (59.9)                                              |
|                                                                                                                                                       | 6-<12                  | 5,090      | 326 (6.4)                       | 14 (4.3)                           | 185 (56.7)                        | 54 (16.6)                           | 239 (73.3)                                              |
|                                                                                                                                                       | 12-<24                 | 3,244      | 171 (5.3)                       | <10 <sup>6</sup>                   | 120 (70.2)                        | 14 (8.2)                            | 134 (78.4)                                              |
|                                                                                                                                                       | 24+                    | 2,035      | 112 (5.5)                       | <10 <sup>6</sup>                   | 90 (80.4)                         | <10 <sup>6</sup>                    | 94 (83.9)                                               |
| <b>Ethnic Group</b>                                                                                                                                   |                        |            |                                 |                                    |                                   |                                     |                                                         |
| 2017/18                                                                                                                                               | White                  | 15,638     | 1,077 (6.9)                     | 76 (7.1)                           | 533 (49.5)                        | 79 (7.3)                            | 612 (56.8)                                              |
|                                                                                                                                                       | Mixed                  | 431        | 30 (7.0)                        | <10 <sup>6</sup>                   | 19 (63.3)                         | <10 <sup>6</sup>                    | 19 (63.3)                                               |
|                                                                                                                                                       | Asian or Asian British | 813        | 23 (2.8)                        | <10 <sup>6</sup>                   | <10 <sup>6</sup>                  | <10 <sup>6</sup>                    | <10 <sup>6</sup>                                        |
|                                                                                                                                                       | Black or Black British | 404        | 29 (7.2)                        | <10 <sup>6</sup>                   | <10 <sup>6</sup>                  | <10 <sup>6</sup>                    | 16 (55.2)                                               |
|                                                                                                                                                       | Chinese and Other      | 214        | 19 (8.9)                        | <10 <sup>6</sup>                   | <10 <sup>6</sup>                  | <10 <sup>6</sup>                    | 11 (57.9)                                               |
|                                                                                                                                                       | Unclassified           | 372        | <10 <sup>6</sup>                | <10 <sup>6</sup>                   | <10 <sup>6</sup>                  | <10 <sup>6</sup>                    | <10 <sup>6</sup>                                        |
|                                                                                                                                                       | 2018/19                | White      | 14,911                          | 1,176 (7.9)                        | 69 (5.9)                          | 716 (60.9)                          | 74 (6.3)                                                |
| Mixed                                                                                                                                                 |                        | 371        | 34 (9.2)                        | <10 <sup>6</sup>                   | 17 (50.0)                         | <10 <sup>6</sup>                    | 22 (64.7)                                               |
| Asian or Asian British                                                                                                                                |                        | 726        | 23 (3.2)                        | <10 <sup>6</sup>                   | 13 (56.5)                         | <10 <sup>6</sup>                    | 13 (56.5)                                               |
| Black or Black British                                                                                                                                |                        | 364        | 22 (6.0)                        | <10 <sup>6</sup>                   | 15 (68.2)                         | <10 <sup>6</sup>                    | 16 (72.7)                                               |
| Chinese and Other                                                                                                                                     |                        | 167        | 19 (11.4)                       | <10 <sup>6</sup>                   | <10 <sup>6</sup>                  | <10 <sup>6</sup>                    | <10 <sup>6</sup>                                        |
| Unclassified                                                                                                                                          |                        | 409        | <10 <sup>6</sup>                | <10 <sup>6</sup>                   | <10 <sup>6</sup>                  | <10 <sup>6</sup>                    | <10 <sup>6</sup>                                        |
| 2019/20                                                                                                                                               |                        | White      | 16,606                          | 1,482 (8.9)                        | 58 (3.9)                          | 820 (55.3)                          | 162 (10.9)                                              |
|                                                                                                                                                       | Mixed                  | 409        | 29 (7.1)                        | <10 <sup>6</sup>                   | 18 (62.1)                         | <10 <sup>6</sup>                    | 22 (75.9)                                               |
|                                                                                                                                                       | Asian or Asian British | 755        | 18 (2.4)                        | <10 <sup>6</sup>                   | 14 (77.8)                         | <10 <sup>6</sup>                    | 14 (77.8)                                               |
|                                                                                                                                                       | Black or Black British | 451        | 29 (6.4)                        | <10 <sup>6</sup>                   | 18 (62.1)                         | <10 <sup>6</sup>                    | 22 (75.9)                                               |
|                                                                                                                                                       | Chinese and Other      | 163        | 20 (12.3)                       | <10 <sup>6</sup>                   | <10 <sup>6</sup>                  | <10 <sup>6</sup>                    | <10 <sup>6</sup>                                        |
|                                                                                                                                                       | Unclassified           | 387        | <10 <sup>6</sup>                | <10 <sup>6</sup>                   | <10 <sup>6</sup>                  | <10 <sup>6</sup>                    | <10 <sup>6</sup>                                        |

<sup>1</sup>Eligible for indicator; <sup>2</sup>Achieve in current prison; <sup>3</sup>Achieve in previous prison; <sup>4</sup>Overall achievement - either current or previous prison; <sup>5</sup>Declined indicator; <sup>6</sup>Suppressed (<10) to avoid disclosure

| The proportion of women eligible for screening and aged 50-64 years who have had cervical screening in the preceding five years and six months |                  |                                 |                                    |                                   |                                     |                                   | Community achievement<br>2019/20: 77.64% (QOF<br>19/20) |
|------------------------------------------------------------------------------------------------------------------------------------------------|------------------|---------------------------------|------------------------------------|-----------------------------------|-------------------------------------|-----------------------------------|---------------------------------------------------------|
| Indicator                                                                                                                                      | Group: Screening |                                 |                                    |                                   |                                     |                                   |                                                         |
| Variable                                                                                                                                       | Population       | Eligible <sup>1</sup> (% popln) | Declined <sup>5</sup> (% eligible) | Satisfy <sup>2</sup> (% eligible) | Elsewhere <sup>3</sup> (% eligible) | Achieve <sup>4</sup> (% eligible) |                                                         |
| <b>Year</b>                                                                                                                                    |                  |                                 |                                    |                                   |                                     |                                   |                                                         |
| 2017/18                                                                                                                                        | 21,677           | 215 (1.0)                       | 16 (7.4)                           | 97 (45.1)                         | 20 (9.3)                            | 117 (54.4)                        |                                                         |
| 2018/19                                                                                                                                        | 22,099           | 243 (1.1)                       | 25 (10.3)                          | 117 (48.1)                        | 21 (8.6)                            | 138 (56.8)                        |                                                         |
| 2019/20                                                                                                                                        | 25,811           | 259 (1.0)                       | 18 (6.9)                           | 129 (49.8)                        | 30 (11.6)                           | 159 (61.4)                        |                                                         |
| <b>Prison</b>                                                                                                                                  |                  |                                 |                                    |                                   |                                     |                                   |                                                         |
| 2017/18                                                                                                                                        | Prison 1         | 1,323                           | <10 <sup>6</sup>                   | <10 <sup>6</sup>                  | <10 <sup>6</sup>                    | <10 <sup>6</sup>                  | <10 <sup>6</sup>                                        |
|                                                                                                                                                | Prison 2         | 3,261                           | <10 <sup>6</sup>                   | <10 <sup>6</sup>                  | <10 <sup>6</sup>                    | <10 <sup>6</sup>                  | <10 <sup>6</sup>                                        |
|                                                                                                                                                | Prison 3         | 2,623                           | <10 <sup>6</sup>                   | <10 <sup>6</sup>                  | <10 <sup>6</sup>                    | <10 <sup>6</sup>                  | <10 <sup>6</sup>                                        |
|                                                                                                                                                | Prison 4         | 2,089                           | <10 <sup>6</sup>                   | <10 <sup>6</sup>                  | <10 <sup>6</sup>                    | <10 <sup>6</sup>                  | <10 <sup>6</sup>                                        |
|                                                                                                                                                | Prison 5         | 637                             | <10 <sup>6</sup>                   | <10 <sup>6</sup>                  | <10 <sup>6</sup>                    | <10 <sup>6</sup>                  | <10 <sup>6</sup>                                        |
|                                                                                                                                                | Prison 6         | 1,552                           | <10 <sup>6</sup>                   | <10 <sup>6</sup>                  | <10 <sup>6</sup>                    | <10 <sup>6</sup>                  | <10 <sup>6</sup>                                        |
|                                                                                                                                                | Prison 7         | 635                             | 68 (10.7)                          | <10 <sup>6</sup>                  | 30 (44.1)                           | 10 (14.7)                         | 40 (58.8)                                               |
|                                                                                                                                                | Prison 8         | 1,085                           | 146 (13.5)                         | 10 (6.8)                          | 67 (45.9)                           | 10 (6.8)                          | 77 (52.7)                                               |
|                                                                                                                                                | Prison 9         | 981                             | <10 <sup>6</sup>                   | <10 <sup>6</sup>                  | <10 <sup>6</sup>                    | <10 <sup>6</sup>                  | <10 <sup>6</sup>                                        |
|                                                                                                                                                | Prison 10        | 2,523                           | <10 <sup>6</sup>                   | <10 <sup>6</sup>                  | <10 <sup>6</sup>                    | <10 <sup>6</sup>                  | <10 <sup>6</sup>                                        |
|                                                                                                                                                | Prison 11        | 3,470                           | <10 <sup>6</sup>                   | <10 <sup>6</sup>                  | <10 <sup>6</sup>                    | <10 <sup>6</sup>                  | <10 <sup>6</sup>                                        |
|                                                                                                                                                | Prison 12        | 815                             | <10 <sup>6</sup>                   | <10 <sup>6</sup>                  | <10 <sup>6</sup>                    | <10 <sup>6</sup>                  | <10 <sup>6</sup>                                        |
|                                                                                                                                                | Prison 13        | 683                             | <10 <sup>6</sup>                   | <10 <sup>6</sup>                  | <10 <sup>6</sup>                    | <10 <sup>6</sup>                  | <10 <sup>6</sup>                                        |
| 2018/19                                                                                                                                        | Prison 1         | 1,333                           | <10 <sup>6</sup>                   | <10 <sup>6</sup>                  | <10 <sup>6</sup>                    | <10 <sup>6</sup>                  | <10 <sup>6</sup>                                        |
|                                                                                                                                                | Prison 2         | 2,705                           | <10 <sup>6</sup>                   | <10 <sup>6</sup>                  | <10 <sup>6</sup>                    | <10 <sup>6</sup>                  | <10 <sup>6</sup>                                        |
|                                                                                                                                                | Prison 3         | 2,522                           | <10 <sup>6</sup>                   | <10 <sup>6</sup>                  | <10 <sup>6</sup>                    | <10 <sup>6</sup>                  | <10 <sup>6</sup>                                        |
|                                                                                                                                                | Prison 4         | 2,349                           | <10 <sup>6</sup>                   | <10 <sup>6</sup>                  | <10 <sup>6</sup>                    | <10 <sup>6</sup>                  | <10 <sup>6</sup>                                        |
|                                                                                                                                                | Prison 5         | 676                             | <10 <sup>6</sup>                   | <10 <sup>6</sup>                  | <10 <sup>6</sup>                    | <10 <sup>6</sup>                  | <10 <sup>6</sup>                                        |
|                                                                                                                                                | Prison 6         | 1,513                           | <10 <sup>6</sup>                   | <10 <sup>6</sup>                  | <10 <sup>6</sup>                    | <10 <sup>6</sup>                  | <10 <sup>6</sup>                                        |
|                                                                                                                                                | Prison 7         | 654                             | 85 (13.0)                          | 11 (12.9)                         | 34 (40.0)                           | 15 (17.6)                         | 49 (57.6)                                               |
|                                                                                                                                                | Prison 8         | 1,148                           | 157 (13.7)                         | 14 (8.9)                          | 83 (52.9)                           | <10 <sup>6</sup>                  | 89 (56.7)                                               |
|                                                                                                                                                | Prison 9         | 996                             | <10 <sup>6</sup>                   | <10 <sup>6</sup>                  | <10 <sup>6</sup>                    | <10 <sup>6</sup>                  | <10 <sup>6</sup>                                        |
|                                                                                                                                                | Prison 10        | 2,717                           | <10 <sup>6</sup>                   | <10 <sup>6</sup>                  | <10 <sup>6</sup>                    | <10 <sup>6</sup>                  | <10 <sup>6</sup>                                        |
|                                                                                                                                                | Prison 11        | 4,020                           | <10 <sup>6</sup>                   | <10 <sup>6</sup>                  | <10 <sup>6</sup>                    | <10 <sup>6</sup>                  | <10 <sup>6</sup>                                        |
|                                                                                                                                                | Prison 12        | 792                             | <10 <sup>6</sup>                   | <10 <sup>6</sup>                  | <10 <sup>6</sup>                    | <10 <sup>6</sup>                  | <10 <sup>6</sup>                                        |
|                                                                                                                                                | Prison 13        | 674                             | <10 <sup>6</sup>                   | <10 <sup>6</sup>                  | <10 <sup>6</sup>                    | <10 <sup>6</sup>                  | <10 <sup>6</sup>                                        |
| 2019/20                                                                                                                                        | Prison 1         | 1,410                           | <10 <sup>6</sup>                   | <10 <sup>6</sup>                  | <10 <sup>6</sup>                    | <10 <sup>6</sup>                  | <10 <sup>6</sup>                                        |
|                                                                                                                                                | Prison 2         | 2,979                           | <10 <sup>6</sup>                   | <10 <sup>6</sup>                  | <10 <sup>6</sup>                    | <10 <sup>6</sup>                  | <10 <sup>6</sup>                                        |
|                                                                                                                                                | Prison 3         | 2,809                           | <10 <sup>6</sup>                   | <10 <sup>6</sup>                  | <10 <sup>6</sup>                    | <10 <sup>6</sup>                  | <10 <sup>6</sup>                                        |
|                                                                                                                                                | Prison 4         | 2,651                           | <10 <sup>6</sup>                   | <10 <sup>6</sup>                  | <10 <sup>6</sup>                    | <10 <sup>6</sup>                  | <10 <sup>6</sup>                                        |
|                                                                                                                                                | Prison 5         | 616                             | <10 <sup>6</sup>                   | <10 <sup>6</sup>                  | <10 <sup>6</sup>                    | <10 <sup>6</sup>                  | <10 <sup>6</sup>                                        |
|                                                                                                                                                | Prison 6         | 1,533                           | <10 <sup>6</sup>                   | <10 <sup>6</sup>                  | <10 <sup>6</sup>                    | <10 <sup>6</sup>                  | <10 <sup>6</sup>                                        |
|                                                                                                                                                | Prison 7         | 860                             | 94 (10.9)                          | <10 <sup>6</sup>                  | 28 (29.8)                           | 25 (26.6)                         | 53 (56.4)                                               |
|                                                                                                                                                | Prison 8         | 1,385                           | 164 (11.8)                         | 12 (7.3)                          | 101 (61.6)                          | <10 <sup>6</sup>                  | 106 (64.6)                                              |
|                                                                                                                                                | Prison 9         | 1,092                           | <10 <sup>6</sup>                   | <10 <sup>6</sup>                  | <10 <sup>6</sup>                    | <10 <sup>6</sup>                  | <10 <sup>6</sup>                                        |
|                                                                                                                                                | Prison 10        | 3,577                           | <10 <sup>6</sup>                   | <10 <sup>6</sup>                  | <10 <sup>6</sup>                    | <10 <sup>6</sup>                  | <10 <sup>6</sup>                                        |
|                                                                                                                                                | Prison 11        | 5,348                           | <10 <sup>6</sup>                   | <10 <sup>6</sup>                  | <10 <sup>6</sup>                    | <10 <sup>6</sup>                  | <10 <sup>6</sup>                                        |
|                                                                                                                                                | Prison 12        | 805                             | <10 <sup>6</sup>                   | <10 <sup>6</sup>                  | <10 <sup>6</sup>                    | <10 <sup>6</sup>                  | <10 <sup>6</sup>                                        |
|                                                                                                                                                | Prison 13        | 746                             | <10 <sup>6</sup>                   | <10 <sup>6</sup>                  | <10 <sup>6</sup>                    | <10 <sup>6</sup>                  | <10 <sup>6</sup>                                        |
| <b>Prison category</b>                                                                                                                         |                  |                                 |                                    |                                   |                                     |                                   |                                                         |
| 2017/18                                                                                                                                        | A                | 1,664                           | <10 <sup>6</sup>                   | <10 <sup>6</sup>                  | <10 <sup>6</sup>                    | <10 <sup>6</sup>                  | <10 <sup>6</sup>                                        |
|                                                                                                                                                | B                | 9,254                           | <10 <sup>6</sup>                   | <10 <sup>6</sup>                  | <10 <sup>6</sup>                    | <10 <sup>6</sup>                  | <10 <sup>6</sup>                                        |
|                                                                                                                                                | C                | 6,035                           | <10 <sup>6</sup>                   | <10 <sup>6</sup>                  | <10 <sup>6</sup>                    | <10 <sup>6</sup>                  | <10 <sup>6</sup>                                        |
|                                                                                                                                                | Closed           | 1,720                           | 214 (12.4)                         | 16 (7.5)                          | 97 (45.3)                           | 20 (9.3)                          | 117 (54.7)                                              |
|                                                                                                                                                | D                | 2,189                           | <10 <sup>6</sup>                   | <10 <sup>6</sup>                  | <10 <sup>6</sup>                    | <10 <sup>6</sup>                  | <10 <sup>6</sup>                                        |
|                                                                                                                                                | YOI              | 815                             | <10 <sup>6</sup>                   | <10 <sup>6</sup>                  | <10 <sup>6</sup>                    | <10 <sup>6</sup>                  | <10 <sup>6</sup>                                        |
| 2018/19                                                                                                                                        | A                | 1,670                           | <10 <sup>6</sup>                   | <10 <sup>6</sup>                  | <10 <sup>6</sup>                    | <10 <sup>6</sup>                  | <10 <sup>6</sup>                                        |
|                                                                                                                                                | B                | 9,442                           | <10 <sup>6</sup>                   | <10 <sup>6</sup>                  | <10 <sup>6</sup>                    | <10 <sup>6</sup>                  | <10 <sup>6</sup>                                        |
|                                                                                                                                                | C                | 6,204                           | <10 <sup>6</sup>                   | <10 <sup>6</sup>                  | <10 <sup>6</sup>                    | <10 <sup>6</sup>                  | <10 <sup>6</sup>                                        |
|                                                                                                                                                | Closed           | 1,802                           | 242 (13.4)                         | 25 (10.3)                         | 117 (48.3)                          | 21 (8.7)                          | 138 (57.0)                                              |
|                                                                                                                                                | D                | 2,189                           | <10 <sup>6</sup>                   | <10 <sup>6</sup>                  | <10 <sup>6</sup>                    | <10 <sup>6</sup>                  | <10 <sup>6</sup>                                        |
|                                                                                                                                                | YOI              | 792                             | <10 <sup>6</sup>                   | <10 <sup>6</sup>                  | <10 <sup>6</sup>                    | <10 <sup>6</sup>                  | <10 <sup>6</sup>                                        |
| 2019/20                                                                                                                                        | A                | 1,838                           | <10 <sup>6</sup>                   | <10 <sup>6</sup>                  | <10 <sup>6</sup>                    | <10 <sup>6</sup>                  | <10 <sup>6</sup>                                        |
|                                                                                                                                                | B                | 11,904                          | <10 <sup>6</sup>                   | <10 <sup>6</sup>                  | <10 <sup>6</sup>                    | <10 <sup>6</sup>                  | <10 <sup>6</sup>                                        |
|                                                                                                                                                | C                | 6,870                           | <10 <sup>6</sup>                   | <10 <sup>6</sup>                  | <10 <sup>6</sup>                    | <10 <sup>6</sup>                  | <10 <sup>6</sup>                                        |
|                                                                                                                                                | Closed           | 2,245                           | 258 (11.5)                         | 18 (7.0)                          | 129 (50.0)                          | 30 (11.6)                         | 159 (61.6)                                              |
|                                                                                                                                                | D                | 2,149                           | <10 <sup>6</sup>                   | <10 <sup>6</sup>                  | <10 <sup>6</sup>                    | <10 <sup>6</sup>                  | <10 <sup>6</sup>                                        |
|                                                                                                                                                | YOI              | 805                             | <10 <sup>6</sup>                   | <10 <sup>6</sup>                  | <10 <sup>6</sup>                    | <10 <sup>6</sup>                  | <10 <sup>6</sup>                                        |
| <b>Gender</b>                                                                                                                                  |                  |                                 |                                    |                                   |                                     |                                   |                                                         |
| 2017/18                                                                                                                                        | F                | 1,699                           | 215 (12.7)                         | 16 (7.4)                          | 97 (45.1)                           | 20 (9.3)                          | 117 (54.4)                                              |
|                                                                                                                                                | M                | 19,977                          | 0 (0.0)                            | 0 (0.0)                           | 0 (0.0)                             | 0 (0.0)                           | 0 (0.0)                                                 |
| 2018/19                                                                                                                                        | F                | 1,802                           | 243 (13.5)                         | 25 (10.3)                         | 117 (48.1)                          | 21 (8.6)                          | 138 (56.8)                                              |
|                                                                                                                                                | M                | 20,295                          | 0 (0.0)                            | 0 (0.0)                           | 0 (0.0)                             | 0 (0.0)                           | 0 (0.0)                                                 |
| 2019/20                                                                                                                                        | F                | 1,376                           | 164 (11.9)                         | 12 (7.3)                          | 101 (61.6)                          | 5 (3.0)                           | 106 (64.6)                                              |
|                                                                                                                                                | M                | 23,570                          | 0 (0.0)                            | 0 (0.0)                           | 0 (0.0)                             | 0 (0.0)                           | 0 (0.0)                                                 |

<sup>1</sup>Eligible for indicator; <sup>2</sup>Achieve in current prison; <sup>3</sup>Achieve in previous prison; <sup>4</sup>Overall achievement - either current or previous prison; <sup>5</sup>Declined indicator; <sup>6</sup>Suppressed (<10) to avoid disclosure

| Indicator              | The proportion of women eligible for screening and aged 50-64 years who have had cervical screening in the preceding five years and six months |                  |                                 |                                    |                                   |                                     | Community achievement<br>2019/20: 77.64% (QOF<br>19/20) |                                   |
|------------------------|------------------------------------------------------------------------------------------------------------------------------------------------|------------------|---------------------------------|------------------------------------|-----------------------------------|-------------------------------------|---------------------------------------------------------|-----------------------------------|
|                        | Group: Screening                                                                                                                               |                  |                                 |                                    |                                   |                                     |                                                         |                                   |
|                        | Variable                                                                                                                                       | Population       | Eligible <sup>1</sup> (% popln) | Declined <sup>5</sup> (% eligible) | Satisfy <sup>2</sup> (% eligible) | Elsewhere <sup>3</sup> (% eligible) |                                                         | Achieve <sup>4</sup> (% eligible) |
| <b>Sentence Status</b> |                                                                                                                                                |                  |                                 |                                    |                                   |                                     |                                                         |                                   |
| 2017/18                | .                                                                                                                                              | 81               | <10 <sup>6</sup>                | <10 <sup>6</sup>                   | <10 <sup>6</sup>                  | <10 <sup>6</sup>                    | <10 <sup>6</sup>                                        |                                   |
|                        | Abscinded                                                                                                                                      | <10 <sup>0</sup> | <10 <sup>6</sup>                | <10 <sup>6</sup>                   | <10 <sup>6</sup>                  | <10 <sup>6</sup>                    | <10 <sup>6</sup>                                        |                                   |
|                        | Active In                                                                                                                                      | 15,872           | 192 (1.2)                       | 15 (7.8)                           | 86 (44.8)                         | 19 (9.9)                            | 105 (54.7)                                              |                                   |
|                        | Active Out                                                                                                                                     | 1,052            | 17 (1.6)                        | <10 <sup>6</sup>                   | <10 <sup>6</sup>                  | <10 <sup>6</sup>                    | 10 (58.8)                                               |                                   |
|                        | Convicted Sentence                                                                                                                             | 2,125            | <10 <sup>6</sup>                | <10 <sup>6</sup>                   | <10 <sup>6</sup>                  | <10 <sup>6</sup>                    | <10 <sup>6</sup>                                        |                                   |
|                        | Downgrade in security category                                                                                                                 | <10 <sup>0</sup> | <10 <sup>6</sup>                | <10 <sup>6</sup>                   | <10 <sup>6</sup>                  | <10 <sup>6</sup>                    | <10 <sup>6</sup>                                        |                                   |
|                        | Internal Cell Move                                                                                                                             | <10 <sup>0</sup> | <10 <sup>6</sup>                | <10 <sup>6</sup>                   | <10 <sup>6</sup>                  | <10 <sup>6</sup>                    | <10 <sup>6</sup>                                        |                                   |
|                        | Judges Remand                                                                                                                                  | 92               | <10 <sup>6</sup>                | <10 <sup>6</sup>                   | <10 <sup>6</sup>                  | <10 <sup>6</sup>                    | <10 <sup>6</sup>                                        |                                   |
|                        | Licence Revoke                                                                                                                                 | 52               | <10 <sup>6</sup>                | <10 <sup>6</sup>                   | <10 <sup>6</sup>                  | <10 <sup>6</sup>                    | <10 <sup>6</sup>                                        |                                   |
|                        | On Remand                                                                                                                                      | 1,492            | <10 <sup>6</sup>                | <10 <sup>6</sup>                   | <10 <sup>6</sup>                  | <10 <sup>6</sup>                    | <10 <sup>6</sup>                                        |                                   |
|                        | Transfer                                                                                                                                       | 910              | <10 <sup>6</sup>                | <10 <sup>6</sup>                   | <10 <sup>6</sup>                  | <10 <sup>6</sup>                    | <10 <sup>6</sup>                                        |                                   |
|                        | Upgrade in security category                                                                                                                   | <10 <sup>0</sup> | <10 <sup>6</sup>                | <10 <sup>6</sup>                   | <10 <sup>6</sup>                  | <10 <sup>6</sup>                    | <10 <sup>6</sup>                                        |                                   |
| 2018/19                | .                                                                                                                                              | 88               | <10 <sup>6</sup>                | <10 <sup>6</sup>                   | <10 <sup>6</sup>                  | <10 <sup>6</sup>                    | <10 <sup>6</sup>                                        |                                   |
|                        | Abscinded                                                                                                                                      | <10 <sup>0</sup> | <10 <sup>6</sup>                | <10 <sup>6</sup>                   | <10 <sup>6</sup>                  | <10 <sup>6</sup>                    | <10 <sup>6</sup>                                        |                                   |
|                        | Active In                                                                                                                                      | 18,145           | 207 (1.1)                       | 22 (10.6)                          | 101 (48.8)                        | 15 (7.2)                            | 116 (56.0)                                              |                                   |
|                        | Active Out                                                                                                                                     | 835              | 22 (2.6)                        | <10 <sup>6</sup>                   | <10 <sup>6</sup>                  | <10 <sup>6</sup>                    | 13 (59.1)                                               |                                   |
|                        | Convicted Sentence                                                                                                                             | 1,320            | 12 (0.9)                        | <10 <sup>6</sup>                   | <10 <sup>6</sup>                  | <10 <sup>6</sup>                    | <10 <sup>6</sup>                                        |                                   |
|                        | Downgrade in security category                                                                                                                 | <10 <sup>0</sup> | <10 <sup>6</sup>                | <10 <sup>6</sup>                   | <10 <sup>6</sup>                  | <10 <sup>6</sup>                    | <10 <sup>6</sup>                                        |                                   |
|                        | Internal Cell Move                                                                                                                             | <10 <sup>0</sup> | <10 <sup>6</sup>                | <10 <sup>6</sup>                   | <10 <sup>6</sup>                  | <10 <sup>6</sup>                    | <10 <sup>6</sup>                                        |                                   |
|                        | Judges Remand                                                                                                                                  | <10 <sup>0</sup> | <10 <sup>6</sup>                | <10 <sup>6</sup>                   | <10 <sup>6</sup>                  | <10 <sup>6</sup>                    | <10 <sup>6</sup>                                        |                                   |
|                        | Licence Revoke                                                                                                                                 | 125              | <10 <sup>6</sup>                | <10 <sup>6</sup>                   | <10 <sup>6</sup>                  | <10 <sup>6</sup>                    | <10 <sup>6</sup>                                        |                                   |
|                        | On Remand                                                                                                                                      | 1,059            | <10 <sup>6</sup>                | <10 <sup>6</sup>                   | <10 <sup>6</sup>                  | <10 <sup>6</sup>                    | <10 <sup>6</sup>                                        |                                   |
|                        | Transfer                                                                                                                                       | 518              | <10 <sup>6</sup>                | <10 <sup>6</sup>                   | <10 <sup>6</sup>                  | <10 <sup>6</sup>                    | <10 <sup>6</sup>                                        |                                   |
|                        | Upgrade in security category                                                                                                                   | <10 <sup>0</sup> | <10 <sup>6</sup>                | <10 <sup>6</sup>                   | <10 <sup>6</sup>                  | <10 <sup>6</sup>                    | <10 <sup>6</sup>                                        |                                   |
| 2019/20                | .                                                                                                                                              | 69               | <10 <sup>6</sup>                | <10 <sup>6</sup>                   | <10 <sup>6</sup>                  | <10 <sup>6</sup>                    | <10 <sup>6</sup>                                        |                                   |
|                        | Abscinded                                                                                                                                      | <10 <sup>0</sup> | <10 <sup>6</sup>                | <10 <sup>6</sup>                   | <10 <sup>6</sup>                  | <10 <sup>6</sup>                    | <10 <sup>6</sup>                                        |                                   |
|                        | Active In                                                                                                                                      | 22,424           | 243 (1.1)                       | 16 (6.6)                           | 123 (50.6)                        | 29 (11.9)                           | 152 (62.6)                                              |                                   |
|                        | Active Out                                                                                                                                     | 625              | 13 (2.1)                        | <10 <sup>6</sup>                   | <10 <sup>6</sup>                  | <10 <sup>6</sup>                    | <10 <sup>6</sup>                                        |                                   |
|                        | Convicted Sentence                                                                                                                             | 1,361            | <10 <sup>6</sup>                | <10 <sup>6</sup>                   | <10 <sup>6</sup>                  | <10 <sup>6</sup>                    | <10 <sup>6</sup>                                        |                                   |
|                        | Downgrade in security category                                                                                                                 | <10 <sup>0</sup> | <10 <sup>6</sup>                | <10 <sup>6</sup>                   | <10 <sup>6</sup>                  | <10 <sup>6</sup>                    | <10 <sup>6</sup>                                        |                                   |
|                        | Internal Cell Move                                                                                                                             | <10 <sup>0</sup> | <10 <sup>6</sup>                | <10 <sup>6</sup>                   | <10 <sup>6</sup>                  | <10 <sup>6</sup>                    | <10 <sup>6</sup>                                        |                                   |
|                        | Judges Remand                                                                                                                                  | 19               | <10 <sup>6</sup>                | <10 <sup>6</sup>                   | <10 <sup>6</sup>                  | <10 <sup>6</sup>                    | <10 <sup>6</sup>                                        |                                   |
|                        | Licence Revoke                                                                                                                                 | 178              | <10 <sup>6</sup>                | <10 <sup>6</sup>                   | <10 <sup>6</sup>                  | <10 <sup>6</sup>                    | <10 <sup>6</sup>                                        |                                   |
|                        | On Remand                                                                                                                                      | 1,031            | <10 <sup>6</sup>                | <10 <sup>6</sup>                   | <10 <sup>6</sup>                  | <10 <sup>6</sup>                    | <10 <sup>6</sup>                                        |                                   |
|                        | Transfer                                                                                                                                       | 101              | <10 <sup>6</sup>                | <10 <sup>6</sup>                   | <10 <sup>6</sup>                  | <10 <sup>6</sup>                    | <10 <sup>6</sup>                                        |                                   |
|                        | Upgrade in security category                                                                                                                   | <10 <sup>0</sup> | <10 <sup>6</sup>                | <10 <sup>6</sup>                   | <10 <sup>6</sup>                  | <10 <sup>6</sup>                    | <10 <sup>6</sup>                                        |                                   |
| <b>Age - years</b>     |                                                                                                                                                |                  |                                 |                                    |                                   |                                     |                                                         |                                   |
| 2017/18                | 10 - <20                                                                                                                                       | 468              | <10 <sup>6</sup>                | <10 <sup>6</sup>                   | <10 <sup>6</sup>                  | <10 <sup>6</sup>                    | <10 <sup>6</sup>                                        |                                   |
|                        | 20 - <30                                                                                                                                       | 6,994            | <10 <sup>6</sup>                | <10 <sup>6</sup>                   | <10 <sup>6</sup>                  | <10 <sup>6</sup>                    | <10 <sup>6</sup>                                        |                                   |
|                        | 30 - <40                                                                                                                                       | 7,051            | <10 <sup>6</sup>                | <10 <sup>6</sup>                   | <10 <sup>6</sup>                  | <10 <sup>6</sup>                    | <10 <sup>6</sup>                                        |                                   |
|                        | 40 - <50                                                                                                                                       | 4,114            | <10 <sup>0</sup>                | <10 <sup>0</sup>                   | <10 <sup>0</sup>                  | <10 <sup>0</sup>                    | <10 <sup>0</sup>                                        |                                   |
|                        | 50 - <60                                                                                                                                       | 2,107            | 178 (8.4)                       | 11 (6.2)                           | 79 (44.4)                         | 17 (9.6)                            | 96 (53.9)                                               |                                   |
|                        | 60 - <70                                                                                                                                       | 684              | 37 (5.4)                        | <10 <sup>6</sup>                   | 18 (48.6)                         | <10 <sup>0</sup>                    | 21 (56.8)                                               |                                   |
|                        | 70 - <80                                                                                                                                       | 213              | <10 <sup>0</sup>                | <10 <sup>0</sup>                   | <10 <sup>0</sup>                  | <10 <sup>0</sup>                    | <10 <sup>0</sup>                                        |                                   |
|                        | 80 - <90                                                                                                                                       | 40               | <10 <sup>0</sup>                | <10 <sup>0</sup>                   | <10 <sup>0</sup>                  | <10 <sup>0</sup>                    | <10 <sup>0</sup>                                        |                                   |
|                        | 90 - <100                                                                                                                                      | <10 <sup>0</sup> | <10 <sup>0</sup>                | <10 <sup>0</sup>                   | <10 <sup>0</sup>                  | <10 <sup>0</sup>                    | <10 <sup>0</sup>                                        |                                   |
|                        | 100 - <110                                                                                                                                     | <10 <sup>0</sup> | <10 <sup>0</sup>                | <10 <sup>0</sup>                   | <10 <sup>0</sup>                  | <10 <sup>0</sup>                    | <10 <sup>0</sup>                                        |                                   |
| 2018/19                | 10 - <20                                                                                                                                       | 436              | <10 <sup>6</sup>                | <10 <sup>6</sup>                   | <10 <sup>6</sup>                  | <10 <sup>6</sup>                    | <10 <sup>6</sup>                                        |                                   |
|                        | 20 - <30                                                                                                                                       | 7,163            | <10 <sup>6</sup>                | <10 <sup>6</sup>                   | <10 <sup>6</sup>                  | <10 <sup>6</sup>                    | <10 <sup>6</sup>                                        |                                   |
|                        | 30 - <40                                                                                                                                       | 7,381            | <10 <sup>6</sup>                | <10 <sup>6</sup>                   | <10 <sup>6</sup>                  | <10 <sup>6</sup>                    | <10 <sup>6</sup>                                        |                                   |
|                        | 40 - <50                                                                                                                                       | 4,180            | <10 <sup>6</sup>                | <10 <sup>6</sup>                   | <10 <sup>6</sup>                  | <10 <sup>6</sup>                    | <10 <sup>6</sup>                                        |                                   |
|                        | 50 - <60                                                                                                                                       | 1,978            | 209 (10.6)                      | 20 (9.6)                           | 106 (50.7)                        | 18 (8.6)                            | 124 (59.3)                                              |                                   |
|                        | 60 - <70                                                                                                                                       | 701              | 34 (4.9)                        | <10 <sup>6</sup>                   | 11 (32.4)                         | <10 <sup>0</sup>                    | 14 (41.2)                                               |                                   |
|                        | 70 - <80                                                                                                                                       | 209              | <10 <sup>0</sup>                | <10 <sup>0</sup>                   | <10 <sup>0</sup>                  | <10 <sup>0</sup>                    | <10 <sup>0</sup>                                        |                                   |
|                        | 80 - <90                                                                                                                                       | 45               | <10 <sup>6</sup>                | <10 <sup>6</sup>                   | <10 <sup>6</sup>                  | <10 <sup>6</sup>                    | <10 <sup>6</sup>                                        |                                   |
|                        | 90 - <100                                                                                                                                      | <10 <sup>0</sup> | <10 <sup>6</sup>                | <10 <sup>6</sup>                   | <10 <sup>6</sup>                  | <10 <sup>6</sup>                    | <10 <sup>6</sup>                                        |                                   |
|                        | 100 - <110                                                                                                                                     | <10 <sup>0</sup> | <10 <sup>6</sup>                | <10 <sup>6</sup>                   | <10 <sup>6</sup>                  | <10 <sup>6</sup>                    | <10 <sup>6</sup>                                        |                                   |
| 2019/20                | 10 - <20                                                                                                                                       | 404              | <10 <sup>6</sup>                | <10 <sup>6</sup>                   | <10 <sup>6</sup>                  | <10 <sup>6</sup>                    | <10 <sup>6</sup>                                        |                                   |
|                        | 20 - <30                                                                                                                                       | 8,064            | <10 <sup>6</sup>                | <10 <sup>6</sup>                   | <10 <sup>6</sup>                  | <10 <sup>6</sup>                    | <10 <sup>6</sup>                                        |                                   |
|                        | 30 - <40                                                                                                                                       | 9,125            | <10 <sup>6</sup>                | <10 <sup>6</sup>                   | <10 <sup>6</sup>                  | <10 <sup>6</sup>                    | <10 <sup>6</sup>                                        |                                   |
|                        | 40 - <50                                                                                                                                       | 4,948            | <10 <sup>0</sup>                | <10 <sup>0</sup>                   | <10 <sup>0</sup>                  | <10 <sup>0</sup>                    | <10 <sup>0</sup>                                        |                                   |
|                        | 50 - <60                                                                                                                                       | 2,224            | 225 (10.1)                      | 14 (6.2)                           | 117 (52.0)                        | 23 (10.2)                           | 140 (62.2)                                              |                                   |
|                        | 60 - <70                                                                                                                                       | 751              | 34 (4.5)                        | <10 <sup>0</sup>                   | 12 (35.3)                         | <10 <sup>0</sup>                    | 19 (55.9)                                               |                                   |
|                        | 70 - <80                                                                                                                                       | 238              | <10 <sup>0</sup>                | <10 <sup>0</sup>                   | <10 <sup>0</sup>                  | <10 <sup>0</sup>                    | <10 <sup>0</sup>                                        |                                   |
|                        | 80 - <90                                                                                                                                       | 53               | <10 <sup>0</sup>                | <10 <sup>0</sup>                   | <10 <sup>0</sup>                  | <10 <sup>0</sup>                    | <10 <sup>0</sup>                                        |                                   |
|                        | 90 - <100                                                                                                                                      | <10 <sup>0</sup> | <10 <sup>0</sup>                | <10 <sup>0</sup>                   | <10 <sup>0</sup>                  | <10 <sup>0</sup>                    | <10 <sup>0</sup>                                        |                                   |
|                        | 100 - <110                                                                                                                                     | <10 <sup>0</sup> | <10 <sup>0</sup>                | <10 <sup>0</sup>                   | <10 <sup>0</sup>                  | <10 <sup>0</sup>                    | <10 <sup>0</sup>                                        |                                   |

<sup>1</sup>Eligible for indicator; <sup>2</sup>Achieve in current prison; <sup>3</sup>Achieve in previous prison; <sup>4</sup>Overall achievement - either current or previous prison; <sup>5</sup>Declined indicator; <sup>6</sup>Suppressed (<10) to avoid disclosure

| Indicator                      | The proportion of women eligible for screening and aged 50-64 years who have had cervical screening in the preceding five years and six months |            |                                 |                                    |                                   |                                     | Community achievement<br>2019/20: 77.64% (QOF<br>19/20) |                                   |
|--------------------------------|------------------------------------------------------------------------------------------------------------------------------------------------|------------|---------------------------------|------------------------------------|-----------------------------------|-------------------------------------|---------------------------------------------------------|-----------------------------------|
|                                | Group: Screening                                                                                                                               |            |                                 |                                    |                                   |                                     |                                                         |                                   |
|                                | Variable                                                                                                                                       | Population | Eligible <sup>1</sup> (% popln) | Declined <sup>5</sup> (% eligible) | Satisfy <sup>2</sup> (% eligible) | Elsewhere <sup>3</sup> (% eligible) |                                                         | Achieve <sup>4</sup> (% eligible) |
| <b>Length of Stay (months)</b> |                                                                                                                                                |            |                                 |                                    |                                   |                                     |                                                         |                                   |
| 2017/18                        | <1                                                                                                                                             | 4,474      | 32 (0.7)                        | <10 <sup>6</sup>                   | <10 <sup>6</sup>                  | <10 <sup>6</sup>                    | 11 (34.4)                                               |                                   |
|                                | 1-<6                                                                                                                                           | 8,075      | 88 (1.1)                        | <10 <sup>6</sup>                   | 45 (51.1)                         | <10 <sup>6</sup>                    | 48 (54.5)                                               |                                   |
|                                | 6-<12                                                                                                                                          | 3,672      | 36 (1.0)                        | <10 <sup>6</sup>                   | 12 (33.3)                         | <10 <sup>6</sup>                    | 16 (44.4)                                               |                                   |
|                                | 12-<24                                                                                                                                         | 2,832      | 15 (0.5)                        | <10 <sup>6</sup>                   | 11 (73.3)                         | <10 <sup>6</sup>                    | 11 (73.3)                                               |                                   |
|                                | 24+                                                                                                                                            | 2,624      | 44 (1.7)                        | <10 <sup>6</sup>                   | 21 (47.7)                         | 10 (22.7)                           | 31 (70.5)                                               |                                   |
| 2018/19                        | <1                                                                                                                                             | 4,801      | 41 (0.9)                        | <10 <sup>6</sup>                   | 17 (41.5)                         | <10 <sup>6</sup>                    | 18 (43.9)                                               |                                   |
|                                | 1-<6                                                                                                                                           | 7,742      | 98 (1.3)                        | 10 (10.2)                          | 51 (52.0)                         | <10 <sup>6</sup>                    | 56 (57.1)                                               |                                   |
|                                | 6-<12                                                                                                                                          | 3,616      | 41 (1.1)                        | <10 <sup>6</sup>                   | 20 (48.8)                         | <10 <sup>6</sup>                    | 26 (63.4)                                               |                                   |
|                                | 12-<24                                                                                                                                         | 3,447      | 17 (0.5)                        | <10 <sup>6</sup>                   | <10 <sup>6</sup>                  | <10 <sup>6</sup>                    | <10 <sup>6</sup>                                        |                                   |
|                                | 24+                                                                                                                                            | 2,493      | 46 (1.8)                        | <10 <sup>6</sup>                   | 22 (47.8)                         | <10 <sup>6</sup>                    | 29 (63.0)                                               |                                   |
| 2019/20                        | <1                                                                                                                                             | 5,745      | 50 (0.9)                        | <10 <sup>6</sup>                   | 24 (48.0)                         | <10 <sup>6</sup>                    | 31 (62.0)                                               |                                   |
|                                | 1-<6                                                                                                                                           | 9,697      | 107 (1.1)                       | <10 <sup>6</sup>                   | 55 (51.4)                         | <10 <sup>6</sup>                    | 64 (59.8)                                               |                                   |
|                                | 6-<12                                                                                                                                          | 5,090      | 51 (1.0)                        | <10 <sup>6</sup>                   | 25 (49.0)                         | <10 <sup>6</sup>                    | 34 (66.7)                                               |                                   |
|                                | 12-<24                                                                                                                                         | 3,244      | 16 (0.5)                        | <10 <sup>6</sup>                   | <10 <sup>6</sup>                  | <10 <sup>6</sup>                    | <10 <sup>6</sup>                                        |                                   |
|                                | 24+                                                                                                                                            | 2,035      | 35 (1.7)                        | <10 <sup>6</sup>                   | 19 (54.3)                         | <10 <sup>6</sup>                    | 22 (62.9)                                               |                                   |
| <b>Ethnic Group</b>            |                                                                                                                                                |            |                                 |                                    |                                   |                                     |                                                         |                                   |
| 2017/18                        | White                                                                                                                                          | 15,638     | 191 (1.2)                       | 15 (7.9)                           | 87 (45.5)                         | 19 (9.9)                            | 106 (55.5)                                              |                                   |
|                                | Mixed                                                                                                                                          | 431        | <10 <sup>6</sup>                | <10 <sup>6</sup>                   | <10 <sup>6</sup>                  | <10 <sup>6</sup>                    | <10 <sup>6</sup>                                        |                                   |
|                                | Asian or Asian British                                                                                                                         | 813        | <10 <sup>6</sup>                | <10 <sup>6</sup>                   | <10 <sup>6</sup>                  | <10 <sup>6</sup>                    | <10 <sup>6</sup>                                        |                                   |
|                                | Black or Black British                                                                                                                         | 404        | <10 <sup>6</sup>                | <10 <sup>6</sup>                   | <10 <sup>6</sup>                  | <10 <sup>6</sup>                    | <10 <sup>6</sup>                                        |                                   |
|                                | Chinese and Other                                                                                                                              | 214        | <10 <sup>6</sup>                | <10 <sup>6</sup>                   | <10 <sup>6</sup>                  | <10 <sup>6</sup>                    | <10 <sup>6</sup>                                        |                                   |
|                                | Unclassified                                                                                                                                   | 372        | <10 <sup>6</sup>                | <10 <sup>6</sup>                   | <10 <sup>6</sup>                  | <10 <sup>6</sup>                    | <10 <sup>6</sup>                                        |                                   |
| 2018/19                        | White                                                                                                                                          | 14,911     | 218 (1.5)                       | 22 (10.1)                          | 108 (49.5)                        | 21 (9.6)                            | 129 (59.2)                                              |                                   |
|                                | Mixed                                                                                                                                          | 371        | <10 <sup>6</sup>                | <10 <sup>6</sup>                   | <10 <sup>6</sup>                  | <10 <sup>6</sup>                    | <10 <sup>6</sup>                                        |                                   |
|                                | Asian or Asian British                                                                                                                         | 726        | <10 <sup>6</sup>                | <10 <sup>6</sup>                   | <10 <sup>6</sup>                  | <10 <sup>6</sup>                    | <10 <sup>6</sup>                                        |                                   |
|                                | Black or Black British                                                                                                                         | 364        | <10 <sup>6</sup>                | <10 <sup>6</sup>                   | <10 <sup>6</sup>                  | <10 <sup>6</sup>                    | <10 <sup>6</sup>                                        |                                   |
|                                | Chinese and Other                                                                                                                              | 167        | <10 <sup>6</sup>                | <10 <sup>6</sup>                   | <10 <sup>6</sup>                  | <10 <sup>6</sup>                    | <10 <sup>6</sup>                                        |                                   |
|                                | Unclassified                                                                                                                                   | 409        | <10 <sup>6</sup>                | <10 <sup>6</sup>                   | <10 <sup>6</sup>                  | <10 <sup>6</sup>                    | <10 <sup>6</sup>                                        |                                   |
| 2019/20                        | White                                                                                                                                          | 16,606     | 218 (1.3)                       | 15 (6.9)                           | 111 (50.9)                        | 27 (12.4)                           | 138 (63.3)                                              |                                   |
|                                | Mixed                                                                                                                                          | 409        | <10 <sup>6</sup>                | <10 <sup>6</sup>                   | <10 <sup>6</sup>                  | <10 <sup>6</sup>                    | <10 <sup>6</sup>                                        |                                   |
|                                | Asian or Asian British                                                                                                                         | 755        | <10 <sup>6</sup>                | <10 <sup>6</sup>                   | <10 <sup>6</sup>                  | <10 <sup>6</sup>                    | <10 <sup>6</sup>                                        |                                   |
|                                | Black or Black British                                                                                                                         | 451        | <10 <sup>6</sup>                | <10 <sup>6</sup>                   | <10 <sup>6</sup>                  | <10 <sup>6</sup>                    | <10 <sup>6</sup>                                        |                                   |
|                                | Chinese and Other                                                                                                                              | 163        | <10 <sup>6</sup>                | <10 <sup>6</sup>                   | <10 <sup>6</sup>                  | <10 <sup>6</sup>                    | <10 <sup>6</sup>                                        |                                   |
|                                | Unclassified                                                                                                                                   | 387        | <10 <sup>6</sup>                | <10 <sup>6</sup>                   | <10 <sup>6</sup>                  | <10 <sup>6</sup>                    | <10 <sup>6</sup>                                        |                                   |

<sup>1</sup>Eligible for indicator; <sup>2</sup>Achieve in current prison; <sup>3</sup>Achieve in previous prison; <sup>4</sup>Overall achievement - either current or previous prison; <sup>5</sup>Declined indicator; <sup>6</sup>Suppressed (<10) to avoid disclosure

no comparable data in 2019/20. NHS Digital reports that proportion of women (50-70) taking up routine breast screening invitations was 70.5% in 2017-18

| Indicator              |           | The proportion of women eligible for screening and aged 50-70 years who have had breast screening in the preceding three years |                                 |                                    |                                   |                                     |                                   |
|------------------------|-----------|--------------------------------------------------------------------------------------------------------------------------------|---------------------------------|------------------------------------|-----------------------------------|-------------------------------------|-----------------------------------|
| Group: Screening       |           | Population                                                                                                                     | Eligible <sup>1</sup> (% popln) | Declined <sup>5</sup> (% eligible) | Satisfy <sup>2</sup> (% eligible) | Elsewhere <sup>3</sup> (% eligible) | Achieve <sup>4</sup> (% eligible) |
| Year                   | Variable  |                                                                                                                                |                                 |                                    |                                   |                                     |                                   |
| 2017/18                |           | 21,677                                                                                                                         | 157 (0.7)                       | <10 <sup>6</sup>                   | 42 (26.8)                         | <10 <sup>6</sup>                    | 45 (28.7)                         |
| 2018/19                |           | 22,099                                                                                                                         | 162 (0.7)                       | <10 <sup>6</sup>                   | 48 (29.6)                         | <10 <sup>6</sup>                    | 51 (31.5)                         |
| 2019/20                |           | 25,811                                                                                                                         | 179 (0.7)                       | <10 <sup>6</sup>                   | 53 (29.6)                         | <10 <sup>6</sup>                    | 59 (33.0)                         |
| <b>Prison</b>          |           |                                                                                                                                |                                 |                                    |                                   |                                     |                                   |
| 2017/18                | Prison 1  | 1,323                                                                                                                          | <10 <sup>6</sup>                | <10 <sup>6</sup>                   | <10 <sup>6</sup>                  | <10 <sup>6</sup>                    | <10 <sup>6</sup>                  |
|                        | Prison 2  | 3,261                                                                                                                          | <10 <sup>6</sup>                | <10 <sup>6</sup>                   | <10 <sup>6</sup>                  | <10 <sup>6</sup>                    | <10 <sup>6</sup>                  |
|                        | Prison 3  | 2,623                                                                                                                          | <10 <sup>6</sup>                | <10 <sup>6</sup>                   | <10 <sup>6</sup>                  | <10 <sup>6</sup>                    | <10 <sup>6</sup>                  |
|                        | Prison 4  | 2,089                                                                                                                          | <10 <sup>6</sup>                | <10 <sup>6</sup>                   | <10 <sup>6</sup>                  | <10 <sup>6</sup>                    | <10 <sup>6</sup>                  |
|                        | Prison 5  | 637                                                                                                                            | <10 <sup>6</sup>                | <10 <sup>6</sup>                   | <10 <sup>6</sup>                  | <10 <sup>6</sup>                    | <10 <sup>6</sup>                  |
|                        | Prison 6  | 1,552                                                                                                                          | <10 <sup>6</sup>                | <10 <sup>6</sup>                   | <10 <sup>6</sup>                  | <10 <sup>6</sup>                    | <10 <sup>6</sup>                  |
|                        | Prison 7  | 635                                                                                                                            | 55 (8.7)                        | <10 <sup>6</sup>                   | 27 (49.1)                         | <10 <sup>6</sup>                    | 27 (49.1)                         |
|                        | Prison 8  | 1,085                                                                                                                          | 102 (9.4)                       | <10 <sup>6</sup>                   | 15 (14.7)                         | <10 <sup>6</sup>                    | 18 (17.6)                         |
|                        | Prison 9  | 981                                                                                                                            | <10 <sup>6</sup>                | <10 <sup>6</sup>                   | <10 <sup>6</sup>                  | <10 <sup>6</sup>                    | <10 <sup>6</sup>                  |
|                        | Prison 10 | 2,523                                                                                                                          | <10 <sup>6</sup>                | <10 <sup>6</sup>                   | <10 <sup>6</sup>                  | <10 <sup>6</sup>                    | <10 <sup>6</sup>                  |
|                        | Prison 11 | 3,470                                                                                                                          | <10 <sup>6</sup>                | <10 <sup>6</sup>                   | <10 <sup>6</sup>                  | <10 <sup>6</sup>                    | <10 <sup>6</sup>                  |
|                        | Prison 12 | 815                                                                                                                            | <10 <sup>6</sup>                | <10 <sup>6</sup>                   | <10 <sup>6</sup>                  | <10 <sup>6</sup>                    | <10 <sup>6</sup>                  |
|                        | Prison 13 | 683                                                                                                                            | <10 <sup>6</sup>                | <10 <sup>6</sup>                   | <10 <sup>6</sup>                  | <10 <sup>6</sup>                    | <10 <sup>6</sup>                  |
| 2018/19                | Prison 1  | 1,333                                                                                                                          | <10 <sup>6</sup>                | <10 <sup>6</sup>                   | <10 <sup>6</sup>                  | <10 <sup>6</sup>                    | <10 <sup>6</sup>                  |
|                        | Prison 2  | 2,705                                                                                                                          | <10 <sup>6</sup>                | <10 <sup>6</sup>                   | <10 <sup>6</sup>                  | <10 <sup>6</sup>                    | <10 <sup>6</sup>                  |
|                        | Prison 3  | 2,522                                                                                                                          | <10 <sup>6</sup>                | <10 <sup>6</sup>                   | <10 <sup>6</sup>                  | <10 <sup>6</sup>                    | <10 <sup>6</sup>                  |
|                        | Prison 4  | 2,349                                                                                                                          | <10 <sup>6</sup>                | <10 <sup>6</sup>                   | <10 <sup>6</sup>                  | <10 <sup>6</sup>                    | <10 <sup>6</sup>                  |
|                        | Prison 5  | 676                                                                                                                            | <10 <sup>6</sup>                | <10 <sup>6</sup>                   | <10 <sup>6</sup>                  | <10 <sup>6</sup>                    | <10 <sup>6</sup>                  |
|                        | Prison 6  | 1,513                                                                                                                          | <10 <sup>6</sup>                | <10 <sup>6</sup>                   | <10 <sup>6</sup>                  | <10 <sup>6</sup>                    | <10 <sup>6</sup>                  |
|                        | Prison 7  | 654                                                                                                                            | 51 (7.8)                        | <10 <sup>6</sup>                   | 22 (43.1)                         | <10 <sup>6</sup>                    | 23 (45.1)                         |
|                        | Prison 8  | 1,148                                                                                                                          | 110 (9.6)                       | <10 <sup>6</sup>                   | 26 (23.6)                         | <10 <sup>6</sup>                    | 28 (25.5)                         |
|                        | Prison 9  | 996                                                                                                                            | <10 <sup>6</sup>                | <10 <sup>6</sup>                   | <10 <sup>6</sup>                  | <10 <sup>6</sup>                    | <10 <sup>6</sup>                  |
|                        | Prison 10 | 2,717                                                                                                                          | <10 <sup>6</sup>                | <10 <sup>6</sup>                   | <10 <sup>6</sup>                  | <10 <sup>6</sup>                    | <10 <sup>6</sup>                  |
|                        | Prison 11 | 4,020                                                                                                                          | <10 <sup>6</sup>                | <10 <sup>6</sup>                   | <10 <sup>6</sup>                  | <10 <sup>6</sup>                    | <10 <sup>6</sup>                  |
|                        | Prison 12 | 792                                                                                                                            | <10 <sup>6</sup>                | <10 <sup>6</sup>                   | <10 <sup>6</sup>                  | <10 <sup>6</sup>                    | <10 <sup>6</sup>                  |
|                        | Prison 13 | 674                                                                                                                            | <10 <sup>6</sup>                | <10 <sup>6</sup>                   | <10 <sup>6</sup>                  | <10 <sup>6</sup>                    | <10 <sup>6</sup>                  |
| 2019/20                | Prison 1  | 1,410                                                                                                                          | <10 <sup>6</sup>                | <10 <sup>6</sup>                   | <10 <sup>6</sup>                  | <10 <sup>6</sup>                    | <10 <sup>6</sup>                  |
|                        | Prison 2  | 2,979                                                                                                                          | <10 <sup>6</sup>                | <10 <sup>6</sup>                   | <10 <sup>6</sup>                  | <10 <sup>6</sup>                    | <10 <sup>6</sup>                  |
|                        | Prison 3  | 2,809                                                                                                                          | <10 <sup>6</sup>                | <10 <sup>6</sup>                   | <10 <sup>6</sup>                  | <10 <sup>6</sup>                    | <10 <sup>6</sup>                  |
|                        | Prison 4  | 2,651                                                                                                                          | <10 <sup>6</sup>                | <10 <sup>6</sup>                   | <10 <sup>6</sup>                  | <10 <sup>6</sup>                    | <10 <sup>6</sup>                  |
|                        | Prison 5  | 616                                                                                                                            | <10 <sup>6</sup>                | <10 <sup>6</sup>                   | <10 <sup>6</sup>                  | <10 <sup>6</sup>                    | <10 <sup>6</sup>                  |
|                        | Prison 6  | 1,533                                                                                                                          | <10 <sup>6</sup>                | <10 <sup>6</sup>                   | <10 <sup>6</sup>                  | <10 <sup>6</sup>                    | <10 <sup>6</sup>                  |
|                        | Prison 7  | 860                                                                                                                            | 73 (8.5)                        | <10 <sup>6</sup>                   | 23 (31.5)                         | <10 <sup>6</sup>                    | 29 (39.7)                         |
|                        | Prison 8  | 1,385                                                                                                                          | 106 (7.7)                       | <10 <sup>6</sup>                   | 30 (28.3)                         | <10 <sup>6</sup>                    | 30 (28.3)                         |
|                        | Prison 9  | 1,092                                                                                                                          | <10 <sup>6</sup>                | <10 <sup>6</sup>                   | <10 <sup>6</sup>                  | <10 <sup>6</sup>                    | <10 <sup>6</sup>                  |
|                        | Prison 10 | 3,577                                                                                                                          | <10 <sup>6</sup>                | <10 <sup>6</sup>                   | <10 <sup>6</sup>                  | <10 <sup>6</sup>                    | <10 <sup>6</sup>                  |
|                        | Prison 11 | 5,348                                                                                                                          | <10 <sup>6</sup>                | <10 <sup>6</sup>                   | <10 <sup>6</sup>                  | <10 <sup>6</sup>                    | <10 <sup>6</sup>                  |
|                        | Prison 12 | 805                                                                                                                            | <10 <sup>6</sup>                | <10 <sup>6</sup>                   | <10 <sup>6</sup>                  | <10 <sup>6</sup>                    | <10 <sup>6</sup>                  |
|                        | Prison 13 | 746                                                                                                                            | <10 <sup>6</sup>                | <10 <sup>6</sup>                   | <10 <sup>6</sup>                  | <10 <sup>6</sup>                    | <10 <sup>6</sup>                  |
| <b>Prison category</b> |           |                                                                                                                                |                                 |                                    |                                   |                                     |                                   |
| 2017/18                | A         | 1,664                                                                                                                          | <10 <sup>6</sup>                | <10 <sup>6</sup>                   | <10 <sup>6</sup>                  | <10 <sup>6</sup>                    | <10 <sup>6</sup>                  |
|                        | B         | 9,254                                                                                                                          | <10 <sup>6</sup>                | <10 <sup>6</sup>                   | <10 <sup>6</sup>                  | <10 <sup>6</sup>                    | <10 <sup>6</sup>                  |
|                        | C         | 6,035                                                                                                                          | <10 <sup>6</sup>                | <10 <sup>6</sup>                   | <10 <sup>6</sup>                  | <10 <sup>6</sup>                    | <10 <sup>6</sup>                  |
|                        | Closed    | 1,720                                                                                                                          | 157 (9.1)                       | <10 <sup>6</sup>                   | 42 (26.8)                         | <10 <sup>6</sup>                    | 45 (28.7)                         |
|                        | D         | 2,189                                                                                                                          | <10 <sup>6</sup>                | <10 <sup>6</sup>                   | <10 <sup>6</sup>                  | <10 <sup>6</sup>                    | <10 <sup>6</sup>                  |
|                        | YOI       | 815                                                                                                                            | <10 <sup>6</sup>                | <10 <sup>6</sup>                   | <10 <sup>6</sup>                  | <10 <sup>6</sup>                    | <10 <sup>6</sup>                  |
| 2018/19                | A         | 1,670                                                                                                                          | <10 <sup>6</sup>                | <10 <sup>6</sup>                   | <10 <sup>6</sup>                  | <10 <sup>6</sup>                    | <10 <sup>6</sup>                  |
|                        | B         | 9,442                                                                                                                          | <10 <sup>6</sup>                | <10 <sup>6</sup>                   | <10 <sup>6</sup>                  | <10 <sup>6</sup>                    | <10 <sup>6</sup>                  |
|                        | C         | 6,204                                                                                                                          | <10 <sup>6</sup>                | <10 <sup>6</sup>                   | <10 <sup>6</sup>                  | <10 <sup>6</sup>                    | <10 <sup>6</sup>                  |
|                        | Closed    | 1,802                                                                                                                          | 161 (8.9)                       | <10 <sup>6</sup>                   | 48 (29.8)                         | <10 <sup>6</sup>                    | 51 (31.7)                         |
|                        | D         | 2,189                                                                                                                          | <10 <sup>6</sup>                | <10 <sup>6</sup>                   | <10 <sup>6</sup>                  | <10 <sup>6</sup>                    | <10 <sup>6</sup>                  |
|                        | YOI       | 792                                                                                                                            | <10 <sup>6</sup>                | <10 <sup>6</sup>                   | <10 <sup>6</sup>                  | <10 <sup>6</sup>                    | <10 <sup>6</sup>                  |
| 2019/20                | A         | 1,838                                                                                                                          | <10 <sup>6</sup>                | <10 <sup>6</sup>                   | <10 <sup>6</sup>                  | <10 <sup>6</sup>                    | <10 <sup>6</sup>                  |
|                        | B         | 11,904                                                                                                                         | <10 <sup>6</sup>                | <10 <sup>6</sup>                   | <10 <sup>6</sup>                  | <10 <sup>6</sup>                    | <10 <sup>6</sup>                  |
|                        | C         | 6,870                                                                                                                          | <10 <sup>6</sup>                | <10 <sup>6</sup>                   | <10 <sup>6</sup>                  | <10 <sup>6</sup>                    | <10 <sup>6</sup>                  |
|                        | Closed    | 2,245                                                                                                                          | 179 (8.0)                       | <10 <sup>6</sup>                   | 53 (29.6)                         | <10 <sup>6</sup>                    | 59 (33.0)                         |
|                        | D         | 2,149                                                                                                                          | <10 <sup>6</sup>                | <10 <sup>6</sup>                   | <10 <sup>6</sup>                  | <10 <sup>6</sup>                    | <10 <sup>6</sup>                  |
|                        | YOI       | 805                                                                                                                            | <10 <sup>6</sup>                | <10 <sup>6</sup>                   | <10 <sup>6</sup>                  | <10 <sup>6</sup>                    | <10 <sup>6</sup>                  |
| <b>Gender</b>          |           |                                                                                                                                |                                 |                                    |                                   |                                     |                                   |
| 2017/18                | F         | 1,699                                                                                                                          | 157 (9.2)                       | <10 <sup>6</sup>                   | 42 (26.8)                         | <10 <sup>6</sup>                    | 45 (28.7)                         |
|                        | M         | 19,977                                                                                                                         | 0 (0.0)                         | <10 <sup>6</sup>                   | 0 (0.0)                           | <10 <sup>6</sup>                    | 0 (0.0)                           |
| 2018/19                | F         | 1,802                                                                                                                          | 162 (9.0)                       | <10 <sup>6</sup>                   | 48 (29.6)                         | <10 <sup>6</sup>                    | 51 (31.5)                         |
|                        | M         | 20,295                                                                                                                         | 0 (0.0)                         | <10 <sup>6</sup>                   | 0 (0.0)                           | <10 <sup>6</sup>                    | 0 (0.0)                           |
| 2019/20                | F         | 1,376                                                                                                                          | 106 (7.7)                       | <10 <sup>6</sup>                   | 30 (28.3)                         | <10 <sup>6</sup>                    | 30 (28.3)                         |
|                        | M         | 23,570                                                                                                                         | 0 (0.0)                         | <10 <sup>6</sup>                   | 0 (0.0)                           | <10 <sup>6</sup>                    | 0 (0.0)                           |

<sup>1</sup>Eligible for indicator; <sup>2</sup>Achieve in current prison; <sup>3</sup>Achieve in previous prison; <sup>4</sup>Overall achievement - either current or previous prison; <sup>5</sup>Declined indicator; <sup>6</sup>Suppressed (<10) to avoid disclosure

| The proportion of women eligible for screening and aged 50-70 years who have had breast screening in the preceding three years |                                |                  |                                 |                                    |                                   |                                     | no comparable data in 2019/20. NHS Digital reports that proportion of women (50-70) taking up routine breast screening invitations was 70.5% in 2017-18 |
|--------------------------------------------------------------------------------------------------------------------------------|--------------------------------|------------------|---------------------------------|------------------------------------|-----------------------------------|-------------------------------------|---------------------------------------------------------------------------------------------------------------------------------------------------------|
| Indicator                                                                                                                      | Group: Screening Variable      | Population       | Eligible <sup>1</sup> (% popln) | Declined <sup>5</sup> (% eligible) | Satisfy <sup>2</sup> (% eligible) | Elsewhere <sup>3</sup> (% eligible) |                                                                                                                                                         |
| <b>Sentence Status</b>                                                                                                         |                                |                  |                                 |                                    |                                   |                                     |                                                                                                                                                         |
| 2017/18                                                                                                                        | .                              | 81               | <10 <sup>6</sup>                | <10 <sup>6</sup>                   | <10 <sup>6</sup>                  | <10 <sup>6</sup>                    | <10 <sup>6</sup>                                                                                                                                        |
|                                                                                                                                | Abscinded                      | <10 <sup>6</sup> | <10 <sup>6</sup>                | <10 <sup>6</sup>                   | <10 <sup>6</sup>                  | <10 <sup>6</sup>                    | <10 <sup>6</sup>                                                                                                                                        |
|                                                                                                                                | Active In                      | 15,872           | 146 (0.9)                       | <10 <sup>6</sup>                   | 42 (28.8)                         | <10 <sup>6</sup>                    | 45 (30.8)                                                                                                                                               |
|                                                                                                                                | Active Out                     | 1,052            | <10 <sup>6</sup>                | <10 <sup>6</sup>                   | <10 <sup>6</sup>                  | <10 <sup>6</sup>                    | <10 <sup>6</sup>                                                                                                                                        |
|                                                                                                                                | Convicted Sentence             | 2,125            | <10 <sup>6</sup>                | <10 <sup>6</sup>                   | <10 <sup>6</sup>                  | <10 <sup>6</sup>                    | <10 <sup>6</sup>                                                                                                                                        |
|                                                                                                                                | Downgrade in security category | <10 <sup>6</sup> | <10 <sup>6</sup>                | <10 <sup>6</sup>                   | <10 <sup>6</sup>                  | <10 <sup>6</sup>                    | <10 <sup>6</sup>                                                                                                                                        |
|                                                                                                                                | Internal Cell Move             | <10 <sup>6</sup> | <10 <sup>6</sup>                | <10 <sup>6</sup>                   | <10 <sup>6</sup>                  | <10 <sup>6</sup>                    | <10 <sup>6</sup>                                                                                                                                        |
|                                                                                                                                | Judges Remand                  | 92               | <10 <sup>6</sup>                | <10 <sup>6</sup>                   | <10 <sup>6</sup>                  | <10 <sup>6</sup>                    | <10 <sup>6</sup>                                                                                                                                        |
|                                                                                                                                | Licence Revoke                 | 52               | <10 <sup>6</sup>                | <10 <sup>6</sup>                   | <10 <sup>6</sup>                  | <10 <sup>6</sup>                    | <10 <sup>6</sup>                                                                                                                                        |
|                                                                                                                                | On Remand                      | 1,492            | <10 <sup>6</sup>                | <10 <sup>6</sup>                   | <10 <sup>6</sup>                  | <10 <sup>6</sup>                    | <10 <sup>6</sup>                                                                                                                                        |
|                                                                                                                                | Transfer                       | 910              | <10 <sup>6</sup>                | <10 <sup>6</sup>                   | <10 <sup>6</sup>                  | <10 <sup>6</sup>                    | <10 <sup>6</sup>                                                                                                                                        |
|                                                                                                                                | Upgrade in security category   | <10 <sup>6</sup> | <10 <sup>6</sup>                | <10 <sup>6</sup>                   | <10 <sup>6</sup>                  | <10 <sup>6</sup>                    | <10 <sup>6</sup>                                                                                                                                        |
| 2018/19                                                                                                                        | .                              | 88               | <10 <sup>6</sup>                | <10 <sup>6</sup>                   | <10 <sup>6</sup>                  | <10 <sup>6</sup>                    | <10 <sup>6</sup>                                                                                                                                        |
|                                                                                                                                | Abscinded                      | <10 <sup>6</sup> | <10 <sup>6</sup>                | <10 <sup>6</sup>                   | <10 <sup>6</sup>                  | <10 <sup>6</sup>                    | <10 <sup>6</sup>                                                                                                                                        |
|                                                                                                                                | Active In                      | 18,145           | 142 (0.8)                       | <10 <sup>6</sup>                   | 45 (31.7)                         | <10 <sup>6</sup>                    | 48 (33.8)                                                                                                                                               |
|                                                                                                                                | Active Out                     | 835              | 13 (1.6)                        | <10 <sup>6</sup>                   | <10 <sup>6</sup>                  | <10 <sup>6</sup>                    | <10 <sup>6</sup>                                                                                                                                        |
|                                                                                                                                | Convicted Sentence             | 1,320            | <10 <sup>6</sup>                | <10 <sup>6</sup>                   | <10 <sup>6</sup>                  | <10 <sup>6</sup>                    | <10 <sup>6</sup>                                                                                                                                        |
|                                                                                                                                | Downgrade in security category | <10 <sup>6</sup> | <10 <sup>6</sup>                | <10 <sup>6</sup>                   | <10 <sup>6</sup>                  | <10 <sup>6</sup>                    | <10 <sup>6</sup>                                                                                                                                        |
|                                                                                                                                | Internal Cell Move             | <10 <sup>6</sup> | <10 <sup>6</sup>                | <10 <sup>6</sup>                   | <10 <sup>6</sup>                  | <10 <sup>6</sup>                    | <10 <sup>6</sup>                                                                                                                                        |
|                                                                                                                                | Judges Remand                  | <10 <sup>6</sup> | <10 <sup>6</sup>                | <10 <sup>6</sup>                   | <10 <sup>6</sup>                  | <10 <sup>6</sup>                    | <10 <sup>6</sup>                                                                                                                                        |
|                                                                                                                                | Licence Revoke                 | 125              | <10 <sup>6</sup>                | <10 <sup>6</sup>                   | <10 <sup>6</sup>                  | <10 <sup>6</sup>                    | <10 <sup>6</sup>                                                                                                                                        |
|                                                                                                                                | On Remand                      | 1,059            | <10 <sup>6</sup>                | <10 <sup>6</sup>                   | <10 <sup>6</sup>                  | <10 <sup>6</sup>                    | <10 <sup>6</sup>                                                                                                                                        |
|                                                                                                                                | Transfer                       | 518              | <10 <sup>6</sup>                | <10 <sup>6</sup>                   | <10 <sup>6</sup>                  | <10 <sup>6</sup>                    | <10 <sup>6</sup>                                                                                                                                        |
|                                                                                                                                | Upgrade in security category   | <10 <sup>6</sup> | <10 <sup>6</sup>                | <10 <sup>6</sup>                   | <10 <sup>6</sup>                  | <10 <sup>6</sup>                    | <10 <sup>6</sup>                                                                                                                                        |
| 2019/20                                                                                                                        | .                              | 69               | <10 <sup>6</sup>                | <10 <sup>6</sup>                   | <10 <sup>6</sup>                  | <10 <sup>6</sup>                    | <10 <sup>6</sup>                                                                                                                                        |
|                                                                                                                                | Abscinded                      | <10 <sup>6</sup> | <10 <sup>6</sup>                | <10 <sup>6</sup>                   | <10 <sup>6</sup>                  | <10 <sup>6</sup>                    | <10 <sup>6</sup>                                                                                                                                        |
|                                                                                                                                | Active In                      | 22,424           | 168 (0.7)                       | <10 <sup>6</sup>                   | 50 (29.8)                         | <10 <sup>6</sup>                    | 56 (33.3)                                                                                                                                               |
|                                                                                                                                | Active Out                     | 625              | <10 <sup>6</sup>                | <10 <sup>6</sup>                   | <10 <sup>6</sup>                  | <10 <sup>6</sup>                    | <10 <sup>6</sup>                                                                                                                                        |
|                                                                                                                                | Convicted Sentence             | 1,361            | <10 <sup>6</sup>                | <10 <sup>6</sup>                   | <10 <sup>6</sup>                  | <10 <sup>6</sup>                    | <10 <sup>6</sup>                                                                                                                                        |
|                                                                                                                                | Downgrade in security category | <10 <sup>6</sup> | <10 <sup>6</sup>                | <10 <sup>6</sup>                   | <10 <sup>6</sup>                  | <10 <sup>6</sup>                    | <10 <sup>6</sup>                                                                                                                                        |
|                                                                                                                                | Internal Cell Move             | <10 <sup>6</sup> | <10 <sup>6</sup>                | <10 <sup>6</sup>                   | <10 <sup>6</sup>                  | <10 <sup>6</sup>                    | <10 <sup>6</sup>                                                                                                                                        |
|                                                                                                                                | Judges Remand                  | 19               | <10 <sup>6</sup>                | <10 <sup>6</sup>                   | <10 <sup>6</sup>                  | <10 <sup>6</sup>                    | <10 <sup>6</sup>                                                                                                                                        |
|                                                                                                                                | Licence Revoke                 | 178              | <10 <sup>6</sup>                | <10 <sup>6</sup>                   | <10 <sup>6</sup>                  | <10 <sup>6</sup>                    | <10 <sup>6</sup>                                                                                                                                        |
|                                                                                                                                | On Remand                      | 1,031            | <10 <sup>6</sup>                | <10 <sup>6</sup>                   | <10 <sup>6</sup>                  | <10 <sup>6</sup>                    | <10 <sup>6</sup>                                                                                                                                        |
|                                                                                                                                | Transfer                       | 101              | <10 <sup>6</sup>                | <10 <sup>6</sup>                   | <10 <sup>6</sup>                  | <10 <sup>6</sup>                    | <10 <sup>6</sup>                                                                                                                                        |
|                                                                                                                                | Upgrade in security category   | <10 <sup>6</sup> | <10 <sup>6</sup>                | <10 <sup>6</sup>                   | <10 <sup>6</sup>                  | <10 <sup>6</sup>                    | <10 <sup>6</sup>                                                                                                                                        |
| <b>Age - years</b>                                                                                                             |                                |                  |                                 |                                    |                                   |                                     |                                                                                                                                                         |
| 2017/18                                                                                                                        | 10 - <20                       | 468              | <10 <sup>6</sup>                | <10 <sup>6</sup>                   | <10 <sup>6</sup>                  | <10 <sup>6</sup>                    | <10 <sup>6</sup>                                                                                                                                        |
|                                                                                                                                | 20 - <30                       | 6,994            | <10 <sup>6</sup>                | <10 <sup>6</sup>                   | <10 <sup>6</sup>                  | <10 <sup>6</sup>                    | <10 <sup>6</sup>                                                                                                                                        |
|                                                                                                                                | 30 - <40                       | 7,051            | <10 <sup>6</sup>                | <10 <sup>6</sup>                   | <10 <sup>6</sup>                  | <10 <sup>6</sup>                    | <10 <sup>6</sup>                                                                                                                                        |
|                                                                                                                                | 40 - <50                       | 4,114            | <10 <sup>6</sup>                | <10 <sup>6</sup>                   | <10 <sup>6</sup>                  | <10 <sup>6</sup>                    | <10 <sup>6</sup>                                                                                                                                        |
|                                                                                                                                | 50 - <60                       | 2,107            | 111 (5.3)                       | <10 <sup>6</sup>                   | 33 (29.7)                         | <10 <sup>6</sup>                    | 36 (32.4)                                                                                                                                               |
|                                                                                                                                | 60 - <70                       | 684              | 44 (6.4)                        | <10 <sup>6</sup>                   | <10 <sup>6</sup>                  | <10 <sup>6</sup>                    | <10 <sup>6</sup>                                                                                                                                        |
|                                                                                                                                | 70 - <80                       | 213              | <10 <sup>6</sup>                | <10 <sup>6</sup>                   | <10 <sup>6</sup>                  | <10 <sup>6</sup>                    | <10 <sup>6</sup>                                                                                                                                        |
|                                                                                                                                | 80 - <90                       | 40               | <10 <sup>6</sup>                | <10 <sup>6</sup>                   | <10 <sup>6</sup>                  | <10 <sup>6</sup>                    | <10 <sup>6</sup>                                                                                                                                        |
|                                                                                                                                | 90 - <100                      | <10 <sup>6</sup> | <10 <sup>6</sup>                | <10 <sup>6</sup>                   | <10 <sup>6</sup>                  | <10 <sup>6</sup>                    | <10 <sup>6</sup>                                                                                                                                        |
|                                                                                                                                | 100 - <110                     | <10 <sup>6</sup> | <10 <sup>6</sup>                | <10 <sup>6</sup>                   | <10 <sup>6</sup>                  | <10 <sup>6</sup>                    | <10 <sup>6</sup>                                                                                                                                        |
| 2018/19                                                                                                                        | 10 - <20                       | 436              | <10 <sup>6</sup>                | <10 <sup>6</sup>                   | <10 <sup>6</sup>                  | <10 <sup>6</sup>                    | <10 <sup>6</sup>                                                                                                                                        |
|                                                                                                                                | 20 - <30                       | 7,163            | <10 <sup>6</sup>                | <10 <sup>6</sup>                   | <10 <sup>6</sup>                  | <10 <sup>6</sup>                    | <10 <sup>6</sup>                                                                                                                                        |
|                                                                                                                                | 30 - <40                       | 7,381            | <10 <sup>6</sup>                | <10 <sup>6</sup>                   | <10 <sup>6</sup>                  | <10 <sup>6</sup>                    | <10 <sup>6</sup>                                                                                                                                        |
|                                                                                                                                | 40 - <50                       | 4,180            | <10 <sup>6</sup>                | <10 <sup>6</sup>                   | <10 <sup>6</sup>                  | <10 <sup>6</sup>                    | <10 <sup>6</sup>                                                                                                                                        |
|                                                                                                                                | 50 - <60                       | 1,978            | 120 (6.1)                       | <10 <sup>6</sup>                   | 37 (30.8)                         | <10 <sup>6</sup>                    | 40 (33.3)                                                                                                                                               |
|                                                                                                                                | 60 - <70                       | 701              | 40 (5.7)                        | <10 <sup>6</sup>                   | 11 (27.5)                         | <10 <sup>6</sup>                    | 11 (27.5)                                                                                                                                               |
|                                                                                                                                | 70 - <80                       | 209              | <10 <sup>6</sup>                | <10 <sup>6</sup>                   | <10 <sup>6</sup>                  | <10 <sup>6</sup>                    | <10 <sup>6</sup>                                                                                                                                        |
|                                                                                                                                | 80 - <90                       | 45               | <10 <sup>6</sup>                | <10 <sup>6</sup>                   | <10 <sup>6</sup>                  | <10 <sup>6</sup>                    | <10 <sup>6</sup>                                                                                                                                        |
|                                                                                                                                | 90 - <100                      | <10 <sup>6</sup> | <10 <sup>6</sup>                | <10 <sup>6</sup>                   | <10 <sup>6</sup>                  | <10 <sup>6</sup>                    | <10 <sup>6</sup>                                                                                                                                        |
|                                                                                                                                | 100 - <110                     | <10 <sup>6</sup> | <10 <sup>6</sup>                | <10 <sup>6</sup>                   | <10 <sup>6</sup>                  | <10 <sup>6</sup>                    | <10 <sup>6</sup>                                                                                                                                        |
| 2019/20                                                                                                                        | 10 - <20                       | 404              | <10 <sup>6</sup>                | <10 <sup>6</sup>                   | <10 <sup>6</sup>                  | <10 <sup>6</sup>                    | <10 <sup>6</sup>                                                                                                                                        |
|                                                                                                                                | 20 - <30                       | 8,064            | <10 <sup>6</sup>                | <10 <sup>6</sup>                   | <10 <sup>6</sup>                  | <10 <sup>6</sup>                    | <10 <sup>6</sup>                                                                                                                                        |
|                                                                                                                                | 30 - <40                       | 9,125            | <10 <sup>6</sup>                | <10 <sup>6</sup>                   | <10 <sup>6</sup>                  | <10 <sup>6</sup>                    | <10 <sup>6</sup>                                                                                                                                        |
|                                                                                                                                | 40 - <50                       | 4,948            | <10 <sup>6</sup>                | <10 <sup>6</sup>                   | <10 <sup>6</sup>                  | <10 <sup>6</sup>                    | <10 <sup>6</sup>                                                                                                                                        |
|                                                                                                                                | 50 - <60                       | 2,224            | 131 (5.9)                       | <10 <sup>6</sup>                   | 44 (33.6)                         | <10 <sup>6</sup>                    | 48 (36.6)                                                                                                                                               |
|                                                                                                                                | 60 - <70                       | 751              | 46 (6.1)                        | <10 <sup>6</sup>                   | <10 <sup>6</sup>                  | <10 <sup>6</sup>                    | 11 (23.9)                                                                                                                                               |
|                                                                                                                                | 70 - <80                       | 238              | <10 <sup>6</sup>                | <10 <sup>6</sup>                   | <10 <sup>6</sup>                  | <10 <sup>6</sup>                    | <10 <sup>6</sup>                                                                                                                                        |
|                                                                                                                                | 80 - <90                       | 53               | <10 <sup>6</sup>                | <10 <sup>6</sup>                   | <10 <sup>6</sup>                  | <10 <sup>6</sup>                    | <10 <sup>6</sup>                                                                                                                                        |
|                                                                                                                                | 90 - <100                      | <10 <sup>6</sup> | <10 <sup>6</sup>                | <10 <sup>6</sup>                   | <10 <sup>6</sup>                  | <10 <sup>6</sup>                    | <10 <sup>6</sup>                                                                                                                                        |
|                                                                                                                                | 100 - <110                     | <10 <sup>6</sup> | <10 <sup>6</sup>                | <10 <sup>6</sup>                   | <10 <sup>6</sup>                  | <10 <sup>6</sup>                    | <10 <sup>6</sup>                                                                                                                                        |

<sup>1</sup>Eligible for indicator; <sup>2</sup>Achieve in current prison; <sup>3</sup>Achieve in previous prison; <sup>4</sup>Overall achievement - either current or previous prison; <sup>5</sup>Declined indicator; <sup>6</sup>Suppressed (<10) to avoid disclosure

| The proportion of women eligible for screening and aged 50-70 years who have had breast screening in the preceding three years |                           |            |                                 |                                    |                                   |                                     | no comparable data in 2019/20. NHS Digital reports that proportion of women (50-70) taking up routine breast screening invitations was 70.5% in 2017-18 |
|--------------------------------------------------------------------------------------------------------------------------------|---------------------------|------------|---------------------------------|------------------------------------|-----------------------------------|-------------------------------------|---------------------------------------------------------------------------------------------------------------------------------------------------------|
| Indicator                                                                                                                      | Group: Screening Variable | Population | Eligible <sup>1</sup> (% popln) | Declined <sup>5</sup> (% eligible) | Satisfy <sup>2</sup> (% eligible) | Elsewhere <sup>3</sup> (% eligible) |                                                                                                                                                         |
| <b>Length of Stay (months)</b>                                                                                                 |                           |            |                                 |                                    |                                   |                                     |                                                                                                                                                         |
| 2017/18                                                                                                                        | <1                        | 4,474      | 23 (0.5)                        | <10 <sup>6</sup>                   | <10 <sup>6</sup>                  | <10 <sup>6</sup>                    | <10 <sup>6</sup>                                                                                                                                        |
|                                                                                                                                | 1-<6                      | 8,075      | 60 (0.7)                        | <10 <sup>6</sup>                   | 12 (20.0)                         | <10 <sup>6</sup>                    | 13 (21.7)                                                                                                                                               |
|                                                                                                                                | 6-<12                     | 3,672      | 28 (0.8)                        | <10 <sup>6</sup>                   | <10 <sup>6</sup>                  | <10 <sup>6</sup>                    | 10 (35.7)                                                                                                                                               |
|                                                                                                                                | 12-<24                    | 2,832      | 10 (0.4)                        | <10 <sup>6</sup>                   | <10 <sup>6</sup>                  | <10 <sup>6</sup>                    | <10 <sup>6</sup>                                                                                                                                        |
|                                                                                                                                | 24+                       | 2,624      | 36 (1.4)                        | <10 <sup>6</sup>                   | 18 (50.0)                         | <10 <sup>6</sup>                    | 19 (52.8)                                                                                                                                               |
| 2018/19                                                                                                                        | <1                        | 4,801      | 27 (0.6)                        | <10 <sup>6</sup>                   | <10 <sup>6</sup>                  | <10 <sup>6</sup>                    | <10 <sup>6</sup>                                                                                                                                        |
|                                                                                                                                | 1-<6                      | 7,742      | 58 (0.7)                        | <10 <sup>6</sup>                   | 17 (29.3)                         | <10 <sup>6</sup>                    | 17 (29.3)                                                                                                                                               |
|                                                                                                                                | 6-<12                     | 3,616      | 31 (0.9)                        | <10 <sup>6</sup>                   | <10 <sup>6</sup>                  | <10 <sup>6</sup>                    | 10 (32.3)                                                                                                                                               |
|                                                                                                                                | 12-<24                    | 3,447      | 11 (0.3)                        | <10 <sup>6</sup>                   | <10 <sup>6</sup>                  | <10 <sup>6</sup>                    | <10 <sup>6</sup>                                                                                                                                        |
|                                                                                                                                | 24+                       | 2,493      | 35 (1.4)                        | <10 <sup>6</sup>                   | 14 (40.0)                         | <10 <sup>6</sup>                    | 14 (40.0)                                                                                                                                               |
| 2019/20                                                                                                                        | <1                        | 5,745      | 33 (0.6)                        | <10 <sup>6</sup>                   | <10 <sup>6</sup>                  | <10 <sup>6</sup>                    | 10 (30.3)                                                                                                                                               |
|                                                                                                                                | 1-<6                      | 9,697      | 69 (0.7)                        | <10 <sup>6</sup>                   | 19 (27.5)                         | <10 <sup>6</sup>                    | 21 (30.4)                                                                                                                                               |
|                                                                                                                                | 6-<12                     | 5,090      | 34 (0.7)                        | <10 <sup>6</sup>                   | 10 (29.4)                         | <10 <sup>6</sup>                    | 13 (38.2)                                                                                                                                               |
|                                                                                                                                | 12-<24                    | 3,244      | 14 (0.4)                        | <10 <sup>6</sup>                   | <10 <sup>6</sup>                  | <10 <sup>6</sup>                    | <10 <sup>6</sup>                                                                                                                                        |
|                                                                                                                                | 24+                       | 2,035      | 29 (1.4)                        | <10 <sup>6</sup>                   | 10 (34.5)                         | <10 <sup>6</sup>                    | 10 (34.5)                                                                                                                                               |
| <b>Ethnic Group</b>                                                                                                            |                           |            |                                 |                                    |                                   |                                     |                                                                                                                                                         |
| 2017/18                                                                                                                        | White                     | 15,638     | 141 (0.9)                       | <10 <sup>6</sup>                   | 38 (27.0)                         | <10 <sup>6</sup>                    | 41 (29.1)                                                                                                                                               |
|                                                                                                                                | Mixed                     | 431        | <10 <sup>6</sup>                | <10 <sup>6</sup>                   | <10 <sup>6</sup>                  | <10 <sup>6</sup>                    | <10 <sup>6</sup>                                                                                                                                        |
|                                                                                                                                | Asian or Asian British    | 813        | <10 <sup>6</sup>                | <10 <sup>6</sup>                   | <10 <sup>6</sup>                  | <10 <sup>6</sup>                    | <10 <sup>6</sup>                                                                                                                                        |
|                                                                                                                                | Black or Black British    | 404        | <10 <sup>6</sup>                | <10 <sup>6</sup>                   | <10 <sup>6</sup>                  | <10 <sup>6</sup>                    | <10 <sup>6</sup>                                                                                                                                        |
|                                                                                                                                | Chinese and Other         | 214        | <10 <sup>6</sup>                | <10 <sup>6</sup>                   | <10 <sup>6</sup>                  | <10 <sup>6</sup>                    | <10 <sup>6</sup>                                                                                                                                        |
|                                                                                                                                | Unclassified              | 372        | <10 <sup>6</sup>                | <10 <sup>6</sup>                   | <10 <sup>6</sup>                  | <10 <sup>6</sup>                    | <10 <sup>6</sup>                                                                                                                                        |
| 2018/19                                                                                                                        | White                     | 14,911     | 144 (1.0)                       | <10 <sup>6</sup>                   | 42 (29.2)                         | <10 <sup>6</sup>                    | 45 (31.3)                                                                                                                                               |
|                                                                                                                                | Mixed                     | 371        | <10 <sup>6</sup>                | <10 <sup>6</sup>                   | <10 <sup>6</sup>                  | <10 <sup>6</sup>                    | <10 <sup>6</sup>                                                                                                                                        |
|                                                                                                                                | Asian or Asian British    | 726        | <10 <sup>6</sup>                | <10 <sup>6</sup>                   | <10 <sup>6</sup>                  | <10 <sup>6</sup>                    | <10 <sup>6</sup>                                                                                                                                        |
|                                                                                                                                | Black or Black British    | 364        | <10 <sup>6</sup>                | <10 <sup>6</sup>                   | <10 <sup>6</sup>                  | <10 <sup>6</sup>                    | <10 <sup>6</sup>                                                                                                                                        |
|                                                                                                                                | Chinese and Other         | 167        | <10 <sup>6</sup>                | <10 <sup>6</sup>                   | <10 <sup>6</sup>                  | <10 <sup>6</sup>                    | <10 <sup>6</sup>                                                                                                                                        |
|                                                                                                                                | Unclassified              | 409        | <10 <sup>6</sup>                | <10 <sup>6</sup>                   | <10 <sup>6</sup>                  | <10 <sup>6</sup>                    | <10 <sup>6</sup>                                                                                                                                        |
| 2019/20                                                                                                                        | White                     | 16,606     | 156 (0.9)                       | <10 <sup>6</sup>                   | 48 (30.8)                         | <10 <sup>6</sup>                    | 52 (33.3)                                                                                                                                               |
|                                                                                                                                | Mixed                     | 409        | <10 <sup>6</sup>                | <10 <sup>6</sup>                   | <10 <sup>6</sup>                  | <10 <sup>6</sup>                    | <10 <sup>6</sup>                                                                                                                                        |
|                                                                                                                                | Asian or Asian British    | 755        | <10 <sup>6</sup>                | <10 <sup>6</sup>                   | <10 <sup>6</sup>                  | <10 <sup>6</sup>                    | <10 <sup>6</sup>                                                                                                                                        |
|                                                                                                                                | Black or Black British    | 451        | <10 <sup>6</sup>                | <10 <sup>6</sup>                   | <10 <sup>6</sup>                  | <10 <sup>6</sup>                    | <10 <sup>6</sup>                                                                                                                                        |
|                                                                                                                                | Chinese and Other         | 163        | <10 <sup>6</sup>                | <10 <sup>6</sup>                   | <10 <sup>6</sup>                  | <10 <sup>6</sup>                    | <10 <sup>6</sup>                                                                                                                                        |
|                                                                                                                                | Unclassified              | 387        | <10 <sup>6</sup>                | <10 <sup>6</sup>                   | <10 <sup>6</sup>                  | <10 <sup>6</sup>                    | <10 <sup>6</sup>                                                                                                                                        |

<sup>1</sup>Eligible for indicator; <sup>2</sup>Achieve in current prison; <sup>3</sup>Achieve in previous prison; <sup>4</sup>Overall achievement - either current or previous prison; <sup>5</sup>Declined indicator; <sup>6</sup>Suppressed (<10) to avoid disclosure



no comparable data in QOF 2019/20. PHE source states initial uptake of screening in 2014/15 was 79.5%

| Indicator              |           | The proportion of men eligible for screening and aged 65 years or over with a record of abdominal aortic aneurysm screening |                                 |                                    |                                   |                                     |                                   |
|------------------------|-----------|-----------------------------------------------------------------------------------------------------------------------------|---------------------------------|------------------------------------|-----------------------------------|-------------------------------------|-----------------------------------|
| Group: Screening       |           | Population                                                                                                                  | Eligible <sup>1</sup> (% popln) | Declined <sup>5</sup> (% eligible) | Satisfy <sup>2</sup> (% eligible) | Elsewhere <sup>3</sup> (% eligible) | Achieve <sup>4</sup> (% eligible) |
| Year                   | Variable  |                                                                                                                             |                                 |                                    |                                   |                                     |                                   |
| 2017/18                |           | 21,677                                                                                                                      | 501 (2.3)                       | <10 <sup>6</sup>                   | 195 (38.9)                        | 23 (4.6)                            | 218 (43.5)                        |
| 2018/19                |           | 22,099                                                                                                                      | 478 (2.2)                       | <10 <sup>6</sup>                   | 187 (39.1)                        | 37 (7.7)                            | 224 (46.9)                        |
| 2019/20                |           | 25,811                                                                                                                      | 540 (2.1)                       | <10 <sup>6</sup>                   | 187 (34.6)                        | 54 (10.0)                           | 241 (44.6)                        |
| <b>Prison</b>          |           |                                                                                                                             |                                 |                                    |                                   |                                     |                                   |
| 2017/18                | Prison 1  | 1,323                                                                                                                       | <10 <sup>6</sup>                | <10 <sup>6</sup>                   | <10 <sup>6</sup>                  | <10 <sup>6</sup>                    | <10 <sup>6</sup>                  |
|                        | Prison 2  | 3,261                                                                                                                       | 64 (2.0)                        | <10 <sup>6</sup>                   | 26 (40.6)                         | <10 <sup>6</sup>                    | 27 (42.2)                         |
|                        | Prison 3  | 2,623                                                                                                                       | 64 (2.4)                        | <10 <sup>6</sup>                   | <10 <sup>6</sup>                  | <10 <sup>6</sup>                    | <10 <sup>6</sup>                  |
|                        | Prison 4  | 2,089                                                                                                                       | 82 (3.9)                        | <10 <sup>6</sup>                   | 58 (70.7)                         | <10 <sup>6</sup>                    | 64 (78.0)                         |
|                        | Prison 5  | 637                                                                                                                         | 14 (2.2)                        | <10 <sup>6</sup>                   | <10 <sup>6</sup>                  | <10 <sup>6</sup>                    | <10 <sup>6</sup>                  |
|                        | Prison 6  | 1,552                                                                                                                       | 28 (1.8)                        | <10 <sup>6</sup>                   | 10 (35.7)                         | <10 <sup>6</sup>                    | 14 (50.0)                         |
|                        | Prison 7  | 635                                                                                                                         | <10 <sup>6</sup>                | <10 <sup>6</sup>                   | <10 <sup>6</sup>                  | <10 <sup>6</sup>                    | <10 <sup>6</sup>                  |
|                        | Prison 8  | 1,085                                                                                                                       | <10 <sup>6</sup>                | <10 <sup>6</sup>                   | <10 <sup>6</sup>                  | <10 <sup>6</sup>                    | <10 <sup>6</sup>                  |
|                        | Prison 9  | 981                                                                                                                         | 76 (7.7)                        | <10 <sup>6</sup>                   | 45 (59.2)                         | <10 <sup>6</sup>                    | 48 (63.2)                         |
|                        | Prison 10 | 2,523                                                                                                                       | 54 (2.1)                        | <10 <sup>6</sup>                   | 19 (35.2)                         | <10 <sup>6</sup>                    | 19 (35.2)                         |
|                        | Prison 11 | 3,470                                                                                                                       | 70 (2.0)                        | <10 <sup>6</sup>                   | <10 <sup>6</sup>                  | <10 <sup>6</sup>                    | 13 (18.6)                         |
|                        | Prison 12 | 815                                                                                                                         | <10 <sup>6</sup>                | <10 <sup>6</sup>                   | <10 <sup>6</sup>                  | <10 <sup>6</sup>                    | <10 <sup>6</sup>                  |
|                        | Prison 13 | 683                                                                                                                         | 43 (6.3)                        | <10 <sup>6</sup>                   | 27 (62.8)                         | <10 <sup>6</sup>                    | 29 (67.4)                         |
| 2018/19                | Prison 1  | 1,333                                                                                                                       | <10 <sup>6</sup>                | <10 <sup>6</sup>                   | <10 <sup>6</sup>                  | <10 <sup>6</sup>                    | <10 <sup>6</sup>                  |
|                        | Prison 2  | 2,705                                                                                                                       | 54 (2.0)                        | <10 <sup>6</sup>                   | 26 (48.1)                         | <10 <sup>6</sup>                    | 27 (50.0)                         |
|                        | Prison 3  | 2,522                                                                                                                       | 60 (2.4)                        | <10 <sup>6</sup>                   | <10 <sup>6</sup>                  | <10 <sup>6</sup>                    | <10 <sup>6</sup>                  |
|                        | Prison 4  | 2,349                                                                                                                       | 76 (3.2)                        | <10 <sup>6</sup>                   | 58 (76.3)                         | <10 <sup>6</sup>                    | 65 (85.5)                         |
|                        | Prison 5  | 676                                                                                                                         | 19 (2.8)                        | <10 <sup>6</sup>                   | <10 <sup>6</sup>                  | <10 <sup>6</sup>                    | <10 <sup>6</sup>                  |
|                        | Prison 6  | 1,513                                                                                                                       | 27 (1.8)                        | <10 <sup>6</sup>                   | 13 (48.1)                         | <10 <sup>6</sup>                    | 18 (66.7)                         |
|                        | Prison 7  | 654                                                                                                                         | <10 <sup>6</sup>                | <10 <sup>6</sup>                   | <10 <sup>6</sup>                  | <10 <sup>6</sup>                    | <10 <sup>6</sup>                  |
|                        | Prison 8  | 1,148                                                                                                                       | <10 <sup>6</sup>                | <10 <sup>6</sup>                   | <10 <sup>6</sup>                  | <10 <sup>6</sup>                    | <10 <sup>6</sup>                  |
|                        | Prison 9  | 996                                                                                                                         | 81 (8.1)                        | <10 <sup>6</sup>                   | 42 (51.9)                         | <10 <sup>6</sup>                    | 49 (60.5)                         |
|                        | Prison 10 | 2,717                                                                                                                       | 54 (2.0)                        | <10 <sup>6</sup>                   | 11 (20.4)                         | <10 <sup>6</sup>                    | 14 (25.9)                         |
|                        | Prison 11 | 4,020                                                                                                                       | 56 (1.4)                        | <10 <sup>6</sup>                   | <10 <sup>6</sup>                  | <10 <sup>6</sup>                    | 11 (19.6)                         |
|                        | Prison 12 | 792                                                                                                                         | <10 <sup>6</sup>                | <10 <sup>6</sup>                   | <10 <sup>6</sup>                  | <10 <sup>6</sup>                    | <10 <sup>6</sup>                  |
|                        | Prison 13 | 674                                                                                                                         | 48 (7.1)                        | <10 <sup>6</sup>                   | 27 (56.3)                         | <10 <sup>6</sup>                    | 31 (64.6)                         |
| 2019/20                | Prison 1  | 1,410                                                                                                                       | <10 <sup>6</sup>                | <10 <sup>6</sup>                   | <10 <sup>6</sup>                  | <10 <sup>6</sup>                    | <10 <sup>6</sup>                  |
|                        | Prison 2  | 2,979                                                                                                                       | 60 (2.0)                        | <10 <sup>6</sup>                   | 30 (50.0)                         | <10 <sup>6</sup>                    | 36 (60.0)                         |
|                        | Prison 3  | 2,809                                                                                                                       | 60 (2.1)                        | <10 <sup>6</sup>                   | <10 <sup>6</sup>                  | <10 <sup>6</sup>                    | <10 <sup>6</sup>                  |
|                        | Prison 4  | 2,651                                                                                                                       | 91 (3.4)                        | <10 <sup>6</sup>                   | 51 (56.0)                         | 10 (11.0)                           | 61 (67.0)                         |
|                        | Prison 5  | 616                                                                                                                         | 13 (2.1)                        | <10 <sup>6</sup>                   | <10 <sup>6</sup>                  | <10 <sup>6</sup>                    | 10 (76.9)                         |
|                        | Prison 6  | 1,533                                                                                                                       | 22 (1.4)                        | <10 <sup>6</sup>                   | <10 <sup>6</sup>                  | <10 <sup>6</sup>                    | 14 (63.6)                         |
|                        | Prison 7  | 860                                                                                                                         | <10 <sup>6</sup>                | <10 <sup>6</sup>                   | <10 <sup>6</sup>                  | <10 <sup>6</sup>                    | <10 <sup>6</sup>                  |
|                        | Prison 8  | 1,385                                                                                                                       | <10 <sup>6</sup>                | <10 <sup>6</sup>                   | <10 <sup>6</sup>                  | <10 <sup>6</sup>                    | <10 <sup>6</sup>                  |
|                        | Prison 9  | 1,092                                                                                                                       | 95 (8.7)                        | <10 <sup>6</sup>                   | 44 (46.3)                         | <10 <sup>6</sup>                    | 55 (57.9)                         |
|                        | Prison 10 | 3,577                                                                                                                       | 59 (1.6)                        | <10 <sup>6</sup>                   | 14 (23.7)                         | <10 <sup>6</sup>                    | 18 (30.5)                         |
|                        | Prison 11 | 5,348                                                                                                                       | 78 (1.5)                        | <10 <sup>6</sup>                   | <10 <sup>6</sup>                  | <10 <sup>6</sup>                    | <10 <sup>6</sup>                  |
|                        | Prison 12 | 805                                                                                                                         | <10 <sup>6</sup>                | <10 <sup>6</sup>                   | <10 <sup>6</sup>                  | <10 <sup>6</sup>                    | <10 <sup>6</sup>                  |
|                        | Prison 13 | 746                                                                                                                         | 56 (7.5)                        | <10 <sup>6</sup>                   | 30 (53.6)                         | <10 <sup>6</sup>                    | 33 (58.9)                         |
| <b>Prison category</b> |           |                                                                                                                             |                                 |                                    |                                   |                                     |                                   |
| 2017/18                | A         | 1,664                                                                                                                       | 119 (7.2)                       | <10 <sup>6</sup>                   | 72 (60.5)                         | <10 <sup>6</sup>                    | 77 (64.7)                         |
|                        | B         | 9,254                                                                                                                       | 188 (2.0)                       | <10 <sup>6</sup>                   | 53 (28.2)                         | <10 <sup>6</sup>                    | 59 (31.4)                         |
|                        | C         | 6,035                                                                                                                       | 151 (2.5)                       | <10 <sup>6</sup>                   | 60 (39.7)                         | <10 <sup>6</sup>                    | 67 (44.4)                         |
|                        | Closed    | 1,720                                                                                                                       | <10 <sup>6</sup>                | <10 <sup>6</sup>                   | <10 <sup>6</sup>                  | <10 <sup>6</sup>                    | <10 <sup>6</sup>                  |
|                        | D         | 2,189                                                                                                                       | 42 (1.9)                        | <10 <sup>6</sup>                   | 10 (23.8)                         | <10 <sup>6</sup>                    | 15 (35.7)                         |
|                        | YOI       | 815                                                                                                                         | <10 <sup>6</sup>                | <10 <sup>6</sup>                   | <10 <sup>6</sup>                  | <10 <sup>6</sup>                    | <10 <sup>6</sup>                  |
| 2018/19                | A         | 1,670                                                                                                                       | 129 (7.7)                       | <10 <sup>6</sup>                   | 69 (53.5)                         | 11 (8.5)                            | 80 (62.0)                         |
|                        | B         | 9,442                                                                                                                       | 164 (1.7)                       | <10 <sup>6</sup>                   | 45 (27.4)                         | <10 <sup>6</sup>                    | 52 (31.7)                         |
|                        | C         | 6,204                                                                                                                       | 139 (2.2)                       | <10 <sup>6</sup>                   | 59 (42.4)                         | <10 <sup>6</sup>                    | 68 (48.9)                         |
|                        | Closed    | 1,802                                                                                                                       | <10 <sup>6</sup>                | <10 <sup>6</sup>                   | <10 <sup>6</sup>                  | <10 <sup>6</sup>                    | <10 <sup>6</sup>                  |
|                        | D         | 2,189                                                                                                                       | 46 (2.1)                        | <10 <sup>6</sup>                   | 14 (30.4)                         | 10 (21.7)                           | 24 (52.2)                         |
|                        | YOI       | 792                                                                                                                         | <10 <sup>6</sup>                | <10 <sup>6</sup>                   | <10 <sup>6</sup>                  | <10 <sup>6</sup>                    | <10 <sup>6</sup>                  |
| 2019/20                | A         | 1,838                                                                                                                       | 151 (8.2)                       | <10 <sup>6</sup>                   | 74 (49.0)                         | 14 (9.3)                            | 88 (58.3)                         |
|                        | B         | 11,904                                                                                                                      | 197 (1.7)                       | <10 <sup>6</sup>                   | 49 (24.9)                         | 14 (7.1)                            | 63 (32.0)                         |
|                        | C         | 6,870                                                                                                                       | 157 (2.3)                       | <10 <sup>6</sup>                   | 52 (33.1)                         | 14 (8.9)                            | 66 (42.0)                         |
|                        | Closed    | 2,245                                                                                                                       | <10 <sup>6</sup>                | <10 <sup>6</sup>                   | <10 <sup>6</sup>                  | <10 <sup>6</sup>                    | <10 <sup>6</sup>                  |
|                        | D         | 2,149                                                                                                                       | 35 (1.6)                        | <10 <sup>6</sup>                   | 12 (34.3)                         | 12 (34.3)                           | 24 (68.6)                         |
|                        | YOI       | 805                                                                                                                         | <10 <sup>6</sup>                | <10 <sup>6</sup>                   | <10 <sup>6</sup>                  | <10 <sup>6</sup>                    | <10 <sup>6</sup>                  |
| <b>Gender</b>          |           |                                                                                                                             |                                 |                                    |                                   |                                     |                                   |
| 2017/18                | F         | 1,699                                                                                                                       | 0 (0.0)                         | <10 <sup>6</sup>                   | 0 (0.0)                           | 0 (0.0)                             | 0 (0.0)                           |
|                        | M         | 19,977                                                                                                                      | 501 (2.5)                       | <10 <sup>6</sup>                   | 195 (38.9)                        | 23 (4.6)                            | 218 (43.5)                        |
| 2018/19                | F         | 1,802                                                                                                                       | 0 (0.0)                         | <10 <sup>6</sup>                   | 0 (0.0)                           | 0 (0.0)                             | 0 (0.0)                           |
|                        | M         | 20,295                                                                                                                      | 478 (2.4)                       | <10 <sup>6</sup>                   | 187 (39.1)                        | 37 (7.7)                            | 224 (46.9)                        |
| 2019/20                | F         | 1,376                                                                                                                       | 0 (0.0)                         | <10 <sup>6</sup>                   | 0 (0.0)                           | 0 (0.0)                             | 0 (0.0)                           |
|                        | M         | 23,570                                                                                                                      | 540 (2.3)                       | <10 <sup>6</sup>                   | 187 (34.6)                        | 54 (10.0)                           | 241 (44.6)                        |

<sup>1</sup>Eligible for indicator; <sup>2</sup>Achieve in current prison; <sup>3</sup>Achieve in previous prison; <sup>4</sup>Overall achievement - either current or previous prison; <sup>5</sup>Declined indicator; <sup>6</sup>Suppressed (<10) to avoid disclosure

no comparable data in QOF 2019/20. PHE source states initial uptake of screening in 2014/15 was 79.5%

Indicator *The proportion of men eligible for screening and aged 65 years or over with a record of abdominal aortic aneurysm screening*

| Group: Screening       |                                | Population       | Eligible <sup>1</sup> (% popln) | Declined <sup>5</sup> (% eligible) | Satisfy <sup>2</sup> (% eligible) | Elsewhere <sup>3</sup> (% eligible) | Achieve <sup>4</sup> (% eligible) |
|------------------------|--------------------------------|------------------|---------------------------------|------------------------------------|-----------------------------------|-------------------------------------|-----------------------------------|
| <b>Sentence Status</b> |                                |                  |                                 |                                    |                                   |                                     |                                   |
| 2017/18                | .                              | 81               | <10 <sup>6</sup>                | <10 <sup>6</sup>                   | <10 <sup>6</sup>                  | <10 <sup>6</sup>                    | <10 <sup>6</sup>                  |
|                        | Abscinded                      | <10 <sup>6</sup> | <10 <sup>6</sup>                | <10 <sup>6</sup>                   | <10 <sup>6</sup>                  | <10 <sup>6</sup>                    | <10 <sup>6</sup>                  |
|                        | Active In                      | 15,872           | 380 (2.4)                       | <10 <sup>6</sup>                   | 149 (39.2)                        | 20 (5.3)                            | 169 (44.5)                        |
|                        | Active Out                     | 1,052            | 20 (1.9)                        | <10 <sup>6</sup>                   | <10 <sup>6</sup>                  | <10 <sup>6</sup>                    | <10 <sup>6</sup>                  |
|                        | Convicted Sentence             | 2,125            | 55 (2.6)                        | <10 <sup>6</sup>                   | 23 (41.8)                         | <10 <sup>6</sup>                    | 23 (41.8)                         |
|                        | Downgrade in security category | <10 <sup>6</sup> | <10 <sup>6</sup>                | <10 <sup>6</sup>                   | <10 <sup>6</sup>                  | <10 <sup>6</sup>                    | <10 <sup>6</sup>                  |
|                        | Internal Cell Move             | <10 <sup>6</sup> | <10 <sup>6</sup>                | <10 <sup>6</sup>                   | <10 <sup>6</sup>                  | <10 <sup>6</sup>                    | <10 <sup>6</sup>                  |
|                        | Judges Remand                  | 92               | <10 <sup>6</sup>                | <10 <sup>6</sup>                   | <10 <sup>6</sup>                  | <10 <sup>6</sup>                    | <10 <sup>6</sup>                  |
|                        | Licence Revoke                 | 52               | <10 <sup>6</sup>                | <10 <sup>6</sup>                   | <10 <sup>6</sup>                  | <10 <sup>6</sup>                    | <10 <sup>6</sup>                  |
|                        | On Remand                      | 1,492            | 17 (1.1)                        | <10 <sup>6</sup>                   | <10 <sup>6</sup>                  | <10 <sup>6</sup>                    | <10 <sup>6</sup>                  |
|                        | Transfer                       | 910              | 21 (2.3)                        | <10 <sup>6</sup>                   | <10 <sup>6</sup>                  | <10 <sup>6</sup>                    | 10 (47.6)                         |
|                        | Upgrade in security category   | <10 <sup>6</sup> | <10 <sup>6</sup>                | <10 <sup>6</sup>                   | <10 <sup>6</sup>                  | <10 <sup>6</sup>                    | <10 <sup>6</sup>                  |
| 2018/19                | .                              | 88               | <10 <sup>6</sup>                | <10 <sup>6</sup>                   | <10 <sup>6</sup>                  | <10 <sup>6</sup>                    | <10 <sup>6</sup>                  |
|                        | Abscinded                      | <10 <sup>6</sup> | <10 <sup>6</sup>                | <10 <sup>6</sup>                   | <10 <sup>6</sup>                  | <10 <sup>6</sup>                    | <10 <sup>6</sup>                  |
|                        | Active In                      | 18,145           | 403 (2.2)                       | <10 <sup>6</sup>                   | 157 (39.0)                        | 36 (8.9)                            | 193 (47.9)                        |
|                        | Active Out                     | 835              | 12 (1.4)                        | <10 <sup>6</sup>                   | <10 <sup>6</sup>                  | <10 <sup>6</sup>                    | <10 <sup>6</sup>                  |
|                        | Convicted Sentence             | 1,320            | 35 (2.7)                        | <10 <sup>6</sup>                   | 15 (42.9)                         | <10 <sup>6</sup>                    | 15 (42.9)                         |
|                        | Downgrade in security category | <10 <sup>6</sup> | <10 <sup>6</sup>                | <10 <sup>6</sup>                   | <10 <sup>6</sup>                  | <10 <sup>6</sup>                    | <10 <sup>6</sup>                  |
|                        | Internal Cell Move             | <10 <sup>6</sup> | <10 <sup>6</sup>                | <10 <sup>6</sup>                   | <10 <sup>6</sup>                  | <10 <sup>6</sup>                    | <10 <sup>6</sup>                  |
|                        | Judges Remand                  | <10 <sup>6</sup> | <10 <sup>6</sup>                | <10 <sup>6</sup>                   | <10 <sup>6</sup>                  | <10 <sup>6</sup>                    | <10 <sup>6</sup>                  |
|                        | Licence Revoke                 | 125              | <10 <sup>6</sup>                | <10 <sup>6</sup>                   | <10 <sup>6</sup>                  | <10 <sup>6</sup>                    | <10 <sup>6</sup>                  |
|                        | On Remand                      | 1,059            | 16 (1.5)                        | <10 <sup>6</sup>                   | <10 <sup>6</sup>                  | <10 <sup>6</sup>                    | <10 <sup>6</sup>                  |
|                        | Transfer                       | 518              | <10 <sup>6</sup>                | <10 <sup>6</sup>                   | <10 <sup>6</sup>                  | <10 <sup>6</sup>                    | <10 <sup>6</sup>                  |
|                        | Upgrade in security category   | <10 <sup>6</sup> | <10 <sup>6</sup>                | <10 <sup>6</sup>                   | <10 <sup>6</sup>                  | <10 <sup>6</sup>                    | <10 <sup>6</sup>                  |
| 2019/20                | .                              | 69               | <10 <sup>6</sup>                | <10 <sup>6</sup>                   | <10 <sup>6</sup>                  | <10 <sup>6</sup>                    | <10 <sup>6</sup>                  |
|                        | Abscinded                      | <10 <sup>6</sup> | <10 <sup>6</sup>                | <10 <sup>6</sup>                   | <10 <sup>6</sup>                  | <10 <sup>6</sup>                    | <10 <sup>6</sup>                  |
|                        | Active In                      | 22,424           | 465 (2.1)                       | <10 <sup>6</sup>                   | 156 (33.5)                        | 49 (10.5)                           | 205 (44.1)                        |
|                        | Active Out                     | 625              | 14 (2.2)                        | <10 <sup>6</sup>                   | <10 <sup>6</sup>                  | <10 <sup>6</sup>                    | <10 <sup>6</sup>                  |
|                        | Convicted Sentence             | 1,361            | 35 (2.6)                        | <10 <sup>6</sup>                   | 17 (48.6)                         | <10 <sup>6</sup>                    | 18 (51.4)                         |
|                        | Downgrade in security category | <10 <sup>6</sup> | <10 <sup>6</sup>                | <10 <sup>6</sup>                   | <10 <sup>6</sup>                  | <10 <sup>6</sup>                    | <10 <sup>6</sup>                  |
|                        | Internal Cell Move             | <10 <sup>6</sup> | <10 <sup>6</sup>                | <10 <sup>6</sup>                   | <10 <sup>6</sup>                  | <10 <sup>6</sup>                    | <10 <sup>6</sup>                  |
|                        | Judges Remand                  | 19               | <10 <sup>6</sup>                | <10 <sup>6</sup>                   | <10 <sup>6</sup>                  | <10 <sup>6</sup>                    | <10 <sup>6</sup>                  |
|                        | Licence Revoke                 | 178              | <10 <sup>6</sup>                | <10 <sup>6</sup>                   | <10 <sup>6</sup>                  | <10 <sup>6</sup>                    | <10 <sup>6</sup>                  |
|                        | On Remand                      | 1,031            | 18 (1.7)                        | <10 <sup>6</sup>                   | <10 <sup>6</sup>                  | <10 <sup>6</sup>                    | 11 (61.1)                         |
|                        | Transfer                       | 101              | <10 <sup>6</sup>                | <10 <sup>6</sup>                   | <10 <sup>6</sup>                  | <10 <sup>6</sup>                    | <10 <sup>6</sup>                  |
|                        | Upgrade in security category   | <10 <sup>6</sup> | <10 <sup>6</sup>                | <10 <sup>6</sup>                   | <10 <sup>6</sup>                  | <10 <sup>6</sup>                    | <10 <sup>6</sup>                  |
| <b>Age - years</b>     |                                |                  |                                 |                                    |                                   |                                     |                                   |
| 2017/18                | 10 - <20                       | 468              | <10 <sup>6</sup>                | <10 <sup>6</sup>                   | <10 <sup>6</sup>                  | <10 <sup>6</sup>                    | <10 <sup>6</sup>                  |
|                        | 20 - <30                       | 6,994            | <10 <sup>6</sup>                | <10 <sup>6</sup>                   | <10 <sup>6</sup>                  | <10 <sup>6</sup>                    | <10 <sup>6</sup>                  |
|                        | 30 - <40                       | 7,051            | <10 <sup>6</sup>                | <10 <sup>6</sup>                   | <10 <sup>6</sup>                  | <10 <sup>6</sup>                    | <10 <sup>6</sup>                  |
|                        | 40 - <50                       | 4,114            | <10 <sup>6</sup>                | <10 <sup>6</sup>                   | <10 <sup>6</sup>                  | <10 <sup>6</sup>                    | <10 <sup>6</sup>                  |
|                        | 50 - <60                       | 2,107            | <10 <sup>6</sup>                | <10 <sup>6</sup>                   | <10 <sup>6</sup>                  | <10 <sup>6</sup>                    | <10 <sup>6</sup>                  |
|                        | 60 - <70                       | 213              | 211 (99.1)                      | <10 <sup>6</sup>                   | 89 (42.2)                         | 10 (4.7)                            | 99 (46.9)                         |
|                        | 70 - <80                       | 40               | 40 (100.0)                      | <10 <sup>6</sup>                   | 11 (27.5)                         | <10 <sup>6</sup>                    | 11 (27.5)                         |
|                        | 80 - <90                       | <10 <sup>6</sup> | <10 <sup>6</sup>                | <10 <sup>6</sup>                   | <10 <sup>6</sup>                  | <10 <sup>6</sup>                    | <10 <sup>6</sup>                  |
|                        | 90 - <100                      | <10 <sup>6</sup> | <10 <sup>6</sup>                | <10 <sup>6</sup>                   | <10 <sup>6</sup>                  | <10 <sup>6</sup>                    | <10 <sup>6</sup>                  |
|                        | 100 - <110                     | <10 <sup>6</sup> | <10 <sup>6</sup>                | <10 <sup>6</sup>                   | <10 <sup>6</sup>                  | <10 <sup>6</sup>                    | <10 <sup>6</sup>                  |
| 2018/19                | 10 - <20                       | 436              | <10 <sup>6</sup>                | <10 <sup>6</sup>                   | <10 <sup>6</sup>                  | <10 <sup>6</sup>                    | <10 <sup>6</sup>                  |
|                        | 20 - <30                       | 7,163            | <10 <sup>6</sup>                | <10 <sup>6</sup>                   | <10 <sup>6</sup>                  | <10 <sup>6</sup>                    | <10 <sup>6</sup>                  |
|                        | 30 - <40                       | 7,381            | <10 <sup>6</sup>                | <10 <sup>6</sup>                   | <10 <sup>6</sup>                  | <10 <sup>6</sup>                    | <10 <sup>6</sup>                  |
|                        | 40 - <50                       | 4,180            | <10 <sup>6</sup>                | <10 <sup>6</sup>                   | <10 <sup>6</sup>                  | <10 <sup>6</sup>                    | <10 <sup>6</sup>                  |
|                        | 50 - <60                       | 1,978            | <10 <sup>6</sup>                | <10 <sup>6</sup>                   | <10 <sup>6</sup>                  | <10 <sup>6</sup>                    | <10 <sup>6</sup>                  |
|                        | 60 - <70                       | 701              | 227 (32.4)                      | <10 <sup>6</sup>                   | 87 (38.3)                         | 15 (6.6)                            | 102 (44.9)                        |
|                        | 70 - <80                       | 209              | 204 (97.6)                      | <10 <sup>6</sup>                   | 80 (39.2)                         | 19 (9.3)                            | 99 (48.5)                         |
|                        | 80 - <90                       | 45               | 44 (97.8)                       | <10 <sup>6</sup>                   | 18 (40.9)                         | <10 <sup>6</sup>                    | 21 (47.7)                         |
|                        | 90 - <100                      | <10 <sup>6</sup> | <10 <sup>6</sup>                | <10 <sup>6</sup>                   | <10 <sup>6</sup>                  | <10 <sup>6</sup>                    | <10 <sup>6</sup>                  |
|                        | 100 - <110                     | <10 <sup>6</sup> | <10 <sup>6</sup>                | <10 <sup>6</sup>                   | <10 <sup>6</sup>                  | <10 <sup>6</sup>                    | <10 <sup>6</sup>                  |
| 2019/20                | 10 - <20                       | 404              | <10 <sup>6</sup>                | <10 <sup>6</sup>                   | <10 <sup>6</sup>                  | <10 <sup>6</sup>                    | <10 <sup>6</sup>                  |
|                        | 20 - <30                       | 9,125            | <10 <sup>6</sup>                | <10 <sup>6</sup>                   | <10 <sup>6</sup>                  | <10 <sup>6</sup>                    | <10 <sup>6</sup>                  |
|                        | 30 - <40                       | 4,948            | <10 <sup>6</sup>                | <10 <sup>6</sup>                   | <10 <sup>6</sup>                  | <10 <sup>6</sup>                    | <10 <sup>6</sup>                  |
|                        | 40 - <50                       | 2,224            | <10 <sup>6</sup>                | <10 <sup>6</sup>                   | <10 <sup>6</sup>                  | <10 <sup>6</sup>                    | <10 <sup>6</sup>                  |
|                        | 50 - <60                       | 751              | 254 (33.8)                      | <10 <sup>6</sup>                   | 91 (35.8)                         | 20 (7.9)                            | 111 (43.7)                        |
|                        | 60 - <70                       | 238              | 233 (97.9)                      | <10 <sup>6</sup>                   | 74 (31.8)                         | 32 (13.7)                           | 106 (45.5)                        |
|                        | 70 - <80                       | 53               | 51 (96.2)                       | <10 <sup>6</sup>                   | 20 (39.2)                         | <10 <sup>6</sup>                    | 22 (43.1)                         |
|                        | 80 - <90                       | <10 <sup>6</sup> | <10 <sup>6</sup>                | <10 <sup>6</sup>                   | <10 <sup>6</sup>                  | <10 <sup>6</sup>                    | <10 <sup>6</sup>                  |
|                        | 90 - <100                      | <10 <sup>6</sup> | <10 <sup>6</sup>                | <10 <sup>6</sup>                   | <10 <sup>6</sup>                  | <10 <sup>6</sup>                    | <10 <sup>6</sup>                  |
|                        | 100 - <110                     | <10 <sup>6</sup> | <10 <sup>6</sup>                | <10 <sup>6</sup>                   | <10 <sup>6</sup>                  | <10 <sup>6</sup>                    | <10 <sup>6</sup>                  |

<sup>1</sup>Eligible for indicator; <sup>2</sup>Achieve in current prison; <sup>3</sup>Achieve in previous prison; <sup>4</sup>Overall achievement - either current or previous prison; <sup>5</sup>Declined indicator; <sup>6</sup>Suppressed (<10) to avoid disclosure

no comparable data in QOF 2019/20. PHE source states initial uptake of screening in 2014/15 was 79.5%

| Indicator                      |                        | The proportion of men eligible for screening and aged 65 years or over with a record of abdominal aortic aneurysm screening |                                 |                                    |                                   |                                     |                                   |
|--------------------------------|------------------------|-----------------------------------------------------------------------------------------------------------------------------|---------------------------------|------------------------------------|-----------------------------------|-------------------------------------|-----------------------------------|
| Group: Screening               |                        | Population                                                                                                                  | Eligible <sup>1</sup> (% popln) | Declined <sup>5</sup> (% eligible) | Satisfy <sup>2</sup> (% eligible) | Elsewhere <sup>3</sup> (% eligible) | Achieve <sup>4</sup> (% eligible) |
| Variable                       |                        |                                                                                                                             |                                 |                                    |                                   |                                     |                                   |
| <b>Length of Stay (months)</b> |                        |                                                                                                                             |                                 |                                    |                                   |                                     |                                   |
| 2017/18                        | <1                     | 4,474                                                                                                                       | 60 (1.3)                        | <10 <sup>6</sup>                   | <10 <sup>6</sup>                  | 1 (1.7)                             | <10 <sup>6</sup>                  |
|                                | 1-<6                   | 8,075                                                                                                                       | 92 (1.1)                        | <10 <sup>6</sup>                   | 11 (12.0)                         | <10 <sup>6</sup>                    | 15 (16.3)                         |
|                                | 6-<12                  | 3,672                                                                                                                       | 67 (1.8)                        | <10 <sup>6</sup>                   | 30 (44.8)                         | <10 <sup>6</sup>                    | 33 (49.3)                         |
|                                | 12-<24                 | 2,832                                                                                                                       | 80 (2.8)                        | <10 <sup>6</sup>                   | 35 (43.8)                         | <10 <sup>6</sup>                    | 39 (48.8)                         |
|                                | 24+                    | 2,624                                                                                                                       | 202 (7.7)                       | <10 <sup>6</sup>                   | 118 (58.4)                        | 11 (5.4)                            | 129 (63.9)                        |
| 2018/19                        | <1                     | 4,801                                                                                                                       | 62 (1.3)                        | <10 <sup>6</sup>                   | <10 <sup>6</sup>                  | <10 <sup>6</sup>                    | <10 <sup>6</sup>                  |
|                                | 1-<6                   | 7,742                                                                                                                       | 76 (1.0)                        | <10 <sup>6</sup>                   | 12 (15.8)                         | <10 <sup>6</sup>                    | 19 (25.0)                         |
|                                | 6-<12                  | 3,616                                                                                                                       | 49 (1.4)                        | <10 <sup>6</sup>                   | 18 (36.7)                         | <10 <sup>6</sup>                    | 21 (42.9)                         |
|                                | 12-<24                 | 3,447                                                                                                                       | 87 (2.5)                        | <10 <sup>6</sup>                   | 39 (44.8)                         | <10 <sup>6</sup>                    | 46 (52.9)                         |
|                                | 24+                    | 2,493                                                                                                                       | 204 (8.2)                       | <10 <sup>6</sup>                   | 117 (57.4)                        | 15 (7.4)                            | 132 (64.7)                        |
| 2019/20                        | <1                     | 5,745                                                                                                                       | 78 (1.4)                        | <10 <sup>6</sup>                   | <10 <sup>6</sup>                  | <10 <sup>6</sup>                    | <10 <sup>6</sup>                  |
|                                | 1-<6                   | 9,697                                                                                                                       | 112 (1.2)                       | <10 <sup>6</sup>                   | 14 (12.5)                         | 14 (12.5)                           | 28 (25.0)                         |
|                                | 6-<12                  | 5,090                                                                                                                       | 76 (1.5)                        | <10 <sup>6</sup>                   | 32 (42.1)                         | 10 (13.2)                           | 42 (55.3)                         |
|                                | 12-<24                 | 3,244                                                                                                                       | 83 (2.6)                        | <10 <sup>6</sup>                   | 36 (43.4)                         | <10 <sup>6</sup>                    | 45 (54.2)                         |
|                                | 24+                    | 2,035                                                                                                                       | 191 (9.4)                       | <10 <sup>6</sup>                   | 102 (53.4)                        | 15 (7.9)                            | 117 (61.3)                        |
| <b>Ethnic Group</b>            |                        |                                                                                                                             |                                 |                                    |                                   |                                     |                                   |
| 2017/18                        | White                  | 15,638                                                                                                                      | 417 (2.7)                       | <10 <sup>6</sup>                   | 177 (42.4)                        | 22 (5.3)                            | 199 (47.7)                        |
|                                | Mixed                  | 431                                                                                                                         | <10 <sup>6</sup>                | <10 <sup>6</sup>                   | <10 <sup>6</sup>                  | <10 <sup>6</sup>                    | <10 <sup>6</sup>                  |
|                                | Asian or Asian British | 813                                                                                                                         | <10 <sup>6</sup>                | <10 <sup>6</sup>                   | <10 <sup>6</sup>                  | <10 <sup>6</sup>                    | <10 <sup>6</sup>                  |
|                                | Black or Black British | 404                                                                                                                         | <10 <sup>6</sup>                | <10 <sup>6</sup>                   | <10 <sup>6</sup>                  | <10 <sup>6</sup>                    | <10 <sup>6</sup>                  |
|                                | Chinese and Other      | 214                                                                                                                         | <10 <sup>6</sup>                | <10 <sup>6</sup>                   | <10 <sup>6</sup>                  | <10 <sup>6</sup>                    | <10 <sup>6</sup>                  |
|                                | Unclassified           | 372                                                                                                                         | 13 (3.5)                        | <10 <sup>6</sup>                   | <10 <sup>6</sup>                  | <10 <sup>6</sup>                    | <10 <sup>6</sup>                  |
| 2018/19                        | White                  | 14,911                                                                                                                      | 386 (2.6)                       | <10 <sup>6</sup>                   | 166 (43.0)                        | 30 (7.8)                            | 196 (50.8)                        |
|                                | Mixed                  | 371                                                                                                                         | <10 <sup>6</sup>                | <10 <sup>6</sup>                   | <10 <sup>6</sup>                  | <10 <sup>6</sup>                    | <10 <sup>6</sup>                  |
|                                | Asian or Asian British | 726                                                                                                                         | 10 (1.4)                        | <10 <sup>6</sup>                   | <10 <sup>6</sup>                  | <10 <sup>6</sup>                    | <10 <sup>6</sup>                  |
|                                | Black or Black British | 364                                                                                                                         | <10 <sup>6</sup>                | <10 <sup>6</sup>                   | <10 <sup>6</sup>                  | <10 <sup>6</sup>                    | <10 <sup>6</sup>                  |
|                                | Chinese and Other      | 167                                                                                                                         | <10 <sup>6</sup>                | <10 <sup>6</sup>                   | <10 <sup>6</sup>                  | <10 <sup>6</sup>                    | <10 <sup>6</sup>                  |
|                                | Unclassified           | 409                                                                                                                         | <10 <sup>6</sup>                | <10 <sup>6</sup>                   | <10 <sup>6</sup>                  | <10 <sup>6</sup>                    | <10 <sup>6</sup>                  |
| 2019/20                        | White                  | 16,606                                                                                                                      | 363 (2.2)                       | <10 <sup>6</sup>                   | 160 (44.1)                        | 39 (10.7)                           | 199 (54.8)                        |
|                                | Mixed                  | 409                                                                                                                         | <10 <sup>6</sup>                | <10 <sup>6</sup>                   | <10 <sup>6</sup>                  | <10 <sup>6</sup>                    | <10 <sup>6</sup>                  |
|                                | Asian or Asian British | 755                                                                                                                         | 12 (1.6)                        | <10 <sup>6</sup>                   | <10 <sup>6</sup>                  | <10 <sup>6</sup>                    | <10 <sup>6</sup>                  |
|                                | Black or Black British | 451                                                                                                                         | <10 <sup>6</sup>                | <10 <sup>6</sup>                   | <10 <sup>6</sup>                  | <10 <sup>6</sup>                    | <10 <sup>6</sup>                  |
|                                | Chinese and Other      | 163                                                                                                                         | <10 <sup>6</sup>                | <10 <sup>6</sup>                   | <10 <sup>6</sup>                  | <10 <sup>6</sup>                    | <10 <sup>6</sup>                  |
|                                | Unclassified           | 387                                                                                                                         | 12 (3.1)                        | <10 <sup>6</sup>                   | <10 <sup>6</sup>                  | <10 <sup>6</sup>                    | <10 <sup>6</sup>                  |

<sup>1</sup>Eligible for indicator; <sup>2</sup>Achieve in current prison; <sup>3</sup>Achieve in previous prison; <sup>4</sup>Overall achievement - either current or previous prison; <sup>5</sup>Declined indicator; <sup>6</sup>Suppressed (<10) to avoid disclosure

| <p>The proportion of people aged 45 to 74 years with a recorded cardiovascular disease risk assessment in the preceding 5 years, and who do NOT have a diagnosis of: coronary heart disease, chronic kidney disease, diabetes, hypertension, atrial fibrillation, transient ischaemic attack, familial hypercholesterolemia, heart failure, peripheral arterial disease, stroke or previously documented 20% or higher 10-year cardiovascular disease risk BEFORE the last 5 years</p> |                  |                        |                  |                                 |                                    |                                   | <p>no comparable data in QOF. PHE Fingertips states: % of people in England invited for NHS Health Check per year in 2019/20 was 17.7%, % of people in England receiving an NHS Health Check per year in 2019/20 was 7.7%, % of people in England taking up an NHS Health Check per year in 2019/20 was 43.7%</p> |                                   |
|----------------------------------------------------------------------------------------------------------------------------------------------------------------------------------------------------------------------------------------------------------------------------------------------------------------------------------------------------------------------------------------------------------------------------------------------------------------------------------------|------------------|------------------------|------------------|---------------------------------|------------------------------------|-----------------------------------|-------------------------------------------------------------------------------------------------------------------------------------------------------------------------------------------------------------------------------------------------------------------------------------------------------------------|-----------------------------------|
| Indicator                                                                                                                                                                                                                                                                                                                                                                                                                                                                              | Group: Screening | Variable               | Population       | Eligible <sup>1</sup> (% popIn) | Declined <sup>5</sup> (% eligible) | Satisfy <sup>2</sup> (% eligible) | Elsewhere <sup>3</sup> (% eligible)                                                                                                                                                                                                                                                                               | Achieve <sup>4</sup> (% eligible) |
| <b>Year</b>                                                                                                                                                                                                                                                                                                                                                                                                                                                                            |                  |                        |                  |                                 |                                    |                                   |                                                                                                                                                                                                                                                                                                                   |                                   |
|                                                                                                                                                                                                                                                                                                                                                                                                                                                                                        |                  | 2019/20                | 8,225            | 1,183 (14.4)                    | 77 (6.5)                           | 198 (16.7)                        | 155 (13.1)                                                                                                                                                                                                                                                                                                        | 353 (29.8)                        |
| <b>Prison</b>                                                                                                                                                                                                                                                                                                                                                                                                                                                                          |                  |                        |                  |                                 |                                    |                                   |                                                                                                                                                                                                                                                                                                                   |                                   |
|                                                                                                                                                                                                                                                                                                                                                                                                                                                                                        |                  | 2019/20                |                  |                                 |                                    |                                   |                                                                                                                                                                                                                                                                                                                   |                                   |
|                                                                                                                                                                                                                                                                                                                                                                                                                                                                                        |                  | Prison 1               | 488              | 46 (9.4)                        | <10 <sup>6</sup>                   | <10 <sup>6</sup>                  | 15 (32.6)                                                                                                                                                                                                                                                                                                         | 24 (52.2)                         |
|                                                                                                                                                                                                                                                                                                                                                                                                                                                                                        |                  | Prison 2               | 756              | 114 (15.1)                      | <10 <sup>6</sup>                   | <10 <sup>6</sup>                  | 22 (19.3)                                                                                                                                                                                                                                                                                                         | 30 (26.3)                         |
|                                                                                                                                                                                                                                                                                                                                                                                                                                                                                        |                  | Prison 3               | 1,144            | 136 (11.9)                      | <10 <sup>6</sup>                   | 20 (14.7)                         | 21 (15.4)                                                                                                                                                                                                                                                                                                         | 41 (30.1)                         |
|                                                                                                                                                                                                                                                                                                                                                                                                                                                                                        |                  | Prison 4               | 1,305            | 196 (15.0)                      | <10 <sup>6</sup>                   | <10 <sup>6</sup>                  | 27 (13.8)                                                                                                                                                                                                                                                                                                         | 32 (16.3)                         |
|                                                                                                                                                                                                                                                                                                                                                                                                                                                                                        |                  | Prison 5               | 205              | 38 (18.5)                       | <10 <sup>6</sup>                   | <10 <sup>6</sup>                  | <10 <sup>6</sup>                                                                                                                                                                                                                                                                                                  | 10 (26.3)                         |
|                                                                                                                                                                                                                                                                                                                                                                                                                                                                                        |                  | Prison 6               | 462              | 72 (15.6)                       | <10 <sup>6</sup>                   | 37 (51.4)                         | 11 (15.3)                                                                                                                                                                                                                                                                                                         | 48 (66.7)                         |
|                                                                                                                                                                                                                                                                                                                                                                                                                                                                                        |                  | Prison 7               | 265              | 41 (15.5)                       | <10 <sup>6</sup>                   | <10 <sup>6</sup>                  | <10 <sup>6</sup>                                                                                                                                                                                                                                                                                                  | 10 (24.4)                         |
|                                                                                                                                                                                                                                                                                                                                                                                                                                                                                        |                  | Prison 8               | 339              | 65 (19.2)                       | <10 <sup>6</sup>                   | 10 (15.4)                         | <10 <sup>6</sup>                                                                                                                                                                                                                                                                                                  | 14 (21.5)                         |
|                                                                                                                                                                                                                                                                                                                                                                                                                                                                                        |                  | Prison 9               | 827              | 169 (20.4)                      | 27 (16.0)                          | 35 (20.7)                         | 16 (9.5)                                                                                                                                                                                                                                                                                                          | 51 (30.2)                         |
|                                                                                                                                                                                                                                                                                                                                                                                                                                                                                        |                  | Prison 10              | 657              | 88 (13.4)                       | <10 <sup>6</sup>                   | 14 (15.9)                         | 10 (11.4)                                                                                                                                                                                                                                                                                                         | 24 (27.3)                         |
|                                                                                                                                                                                                                                                                                                                                                                                                                                                                                        |                  | Prison 11              | 892              | 92 (10.3)                       | <10 <sup>6</sup>                   | <10 <sup>6</sup>                  | <10 <sup>6</sup>                                                                                                                                                                                                                                                                                                  | <10 <sup>6</sup>                  |
|                                                                                                                                                                                                                                                                                                                                                                                                                                                                                        |                  | Prison 12              | 310              | <10 <sup>6</sup>                | <10 <sup>6</sup>                   | <10 <sup>6</sup>                  | <10 <sup>6</sup>                                                                                                                                                                                                                                                                                                  | <10 <sup>6</sup>                  |
|                                                                                                                                                                                                                                                                                                                                                                                                                                                                                        |                  | Prison 13              | 575              | 126 (21.9)                      | 19 (15.1)                          | 47 (37.3)                         | 14 (11.1)                                                                                                                                                                                                                                                                                                         | 61 (48.4)                         |
|                                                                                                                                                                                                                                                                                                                                                                                                                                                                                        |                  | 2019/20                |                  |                                 |                                    |                                   |                                                                                                                                                                                                                                                                                                                   |                                   |
|                                                                                                                                                                                                                                                                                                                                                                                                                                                                                        |                  | A                      | 1,402            | 295 (21.0)                      | 46 (15.6)                          | 82 (27.8)                         | 30 (10.2)                                                                                                                                                                                                                                                                                                         | 112 (38.0)                        |
|                                                                                                                                                                                                                                                                                                                                                                                                                                                                                        |                  | B                      | 2,305            | 294 (12.8)                      | <10 <sup>6</sup>                   | 24 (8.2)                          | 38 (12.9)                                                                                                                                                                                                                                                                                                         | 62 (21.1)                         |
|                                                                                                                                                                                                                                                                                                                                                                                                                                                                                        |                  | C                      | 2,937            | 378 (12.9)                      | <10 <sup>6</sup>                   | 34 (9.0)                          | 63 (16.7)                                                                                                                                                                                                                                                                                                         | 97 (25.7)                         |
|                                                                                                                                                                                                                                                                                                                                                                                                                                                                                        |                  | Closed                 | 604              | 106 (17.5)                      | <10 <sup>6</sup>                   | 18 (17.0)                         | <10 <sup>6</sup>                                                                                                                                                                                                                                                                                                  | 24 (22.6)                         |
|                                                                                                                                                                                                                                                                                                                                                                                                                                                                                        |                  | D                      | 667              | 110 (16.5)                      | 17 (15.5)                          | 40 (36.4)                         | 18 (16.4)                                                                                                                                                                                                                                                                                                         | 58 (52.7)                         |
|                                                                                                                                                                                                                                                                                                                                                                                                                                                                                        |                  | YOI                    | 310              | <10 <sup>6</sup>                | <10 <sup>6</sup>                   | <10 <sup>6</sup>                  | <10 <sup>6</sup>                                                                                                                                                                                                                                                                                                  | <10 <sup>6</sup>                  |
| <b>Gender</b>                                                                                                                                                                                                                                                                                                                                                                                                                                                                          |                  |                        |                  |                                 |                                    |                                   |                                                                                                                                                                                                                                                                                                                   |                                   |
|                                                                                                                                                                                                                                                                                                                                                                                                                                                                                        |                  | 2019/20                |                  |                                 |                                    |                                   |                                                                                                                                                                                                                                                                                                                   |                                   |
|                                                                                                                                                                                                                                                                                                                                                                                                                                                                                        |                  | F                      | 604              | 108 (17.9)                      | <10 <sup>6</sup>                   | 18 (16.7)                         | <10 <sup>6</sup>                                                                                                                                                                                                                                                                                                  | 25 (23.1)                         |
|                                                                                                                                                                                                                                                                                                                                                                                                                                                                                        |                  | M                      | 7,621            | 1,075 (14.1)                    | 76 (7.1)                           | 180 (16.7)                        | 148 (13.8)                                                                                                                                                                                                                                                                                                        | 328 (30.5)                        |
| <b>Sentence Status</b>                                                                                                                                                                                                                                                                                                                                                                                                                                                                 |                  |                        |                  |                                 |                                    |                                   |                                                                                                                                                                                                                                                                                                                   |                                   |
|                                                                                                                                                                                                                                                                                                                                                                                                                                                                                        |                  | 2019/20                |                  |                                 |                                    |                                   |                                                                                                                                                                                                                                                                                                                   |                                   |
|                                                                                                                                                                                                                                                                                                                                                                                                                                                                                        |                  | .                      | <10 <sup>6</sup> | <10 <sup>6</sup>                | <10 <sup>6</sup>                   | <10 <sup>6</sup>                  | <10 <sup>6</sup>                                                                                                                                                                                                                                                                                                  | <10 <sup>6</sup>                  |
|                                                                                                                                                                                                                                                                                                                                                                                                                                                                                        |                  | Active In              | 7,522            | 1,072 (14.3)                    | 73 (6.8)                           | 191 (17.8)                        | 129 (12.0)                                                                                                                                                                                                                                                                                                        | 320 (29.9)                        |
|                                                                                                                                                                                                                                                                                                                                                                                                                                                                                        |                  | Active Out             | 72               | <10 <sup>6</sup>                | <10 <sup>6</sup>                   | <10 <sup>6</sup>                  | <10 <sup>6</sup>                                                                                                                                                                                                                                                                                                  | <10 <sup>6</sup>                  |
|                                                                                                                                                                                                                                                                                                                                                                                                                                                                                        |                  | Convicted Sentence     | 277              | 43 (15.5)                       | <10 <sup>6</sup>                   | <10 <sup>6</sup>                  | 10 (23.3)                                                                                                                                                                                                                                                                                                         | 12 (27.9)                         |
|                                                                                                                                                                                                                                                                                                                                                                                                                                                                                        |                  | Judges Remand          | <10 <sup>6</sup> | <10 <sup>6</sup>                | <10 <sup>6</sup>                   | <10 <sup>6</sup>                  | <10 <sup>6</sup>                                                                                                                                                                                                                                                                                                  | <10 <sup>6</sup>                  |
|                                                                                                                                                                                                                                                                                                                                                                                                                                                                                        |                  | Licence Revoke         | 33               | 10 (30.3)                       | <10 <sup>6</sup>                   | <10 <sup>6</sup>                  | <10 <sup>6</sup>                                                                                                                                                                                                                                                                                                  | <10 <sup>6</sup>                  |
|                                                                                                                                                                                                                                                                                                                                                                                                                                                                                        |                  | On Remand              | 300              | 50 (16.7)                       | <10 <sup>6</sup>                   | <10 <sup>6</sup>                  | <10 <sup>6</sup>                                                                                                                                                                                                                                                                                                  | 10 (20.0)                         |
|                                                                                                                                                                                                                                                                                                                                                                                                                                                                                        |                  | Transfer               | 16               | <10 <sup>6</sup>                | <10 <sup>6</sup>                   | <10 <sup>6</sup>                  | <10 <sup>6</sup>                                                                                                                                                                                                                                                                                                  | <10 <sup>6</sup>                  |
| <b>Age - years</b>                                                                                                                                                                                                                                                                                                                                                                                                                                                                     |                  |                        |                  |                                 |                                    |                                   |                                                                                                                                                                                                                                                                                                                   |                                   |
|                                                                                                                                                                                                                                                                                                                                                                                                                                                                                        |                  | 2019/20                |                  |                                 |                                    |                                   |                                                                                                                                                                                                                                                                                                                   |                                   |
|                                                                                                                                                                                                                                                                                                                                                                                                                                                                                        |                  | 10 - <20               | 150              | <10 <sup>6</sup>                | <10 <sup>6</sup>                   | <10 <sup>6</sup>                  | <10 <sup>6</sup>                                                                                                                                                                                                                                                                                                  | <10 <sup>6</sup>                  |
|                                                                                                                                                                                                                                                                                                                                                                                                                                                                                        |                  | 20 - <30               | 2,307            | <10 <sup>6</sup>                | <10 <sup>6</sup>                   | <10 <sup>6</sup>                  | <10 <sup>6</sup>                                                                                                                                                                                                                                                                                                  | <10 <sup>6</sup>                  |
|                                                                                                                                                                                                                                                                                                                                                                                                                                                                                        |                  | 30 - <40               | 2,802            | <10 <sup>6</sup>                | <10 <sup>6</sup>                   | <10 <sup>6</sup>                  | <10 <sup>6</sup>                                                                                                                                                                                                                                                                                                  | <10 <sup>6</sup>                  |
|                                                                                                                                                                                                                                                                                                                                                                                                                                                                                        |                  | 40 - <50               | 1,682            | 522 (31.0)                      | 24 (4.6)                           | 72 (13.8)                         | 78 (14.9)                                                                                                                                                                                                                                                                                                         | 150 (28.7)                        |
|                                                                                                                                                                                                                                                                                                                                                                                                                                                                                        |                  | 50 - <60               | 812              | 528 (65.0)                      | 34 (6.4)                           | 104 (19.7)                        | 67 (12.7)                                                                                                                                                                                                                                                                                                         | 171 (32.4)                        |
|                                                                                                                                                                                                                                                                                                                                                                                                                                                                                        |                  | 60 - <70               | 339              | 118 (34.8)                      | 17 (14.4)                          | 21 (17.8)                         | <10 <sup>6</sup>                                                                                                                                                                                                                                                                                                  | 30 (25.4)                         |
|                                                                                                                                                                                                                                                                                                                                                                                                                                                                                        |                  | 70 - <80               | 113              | 15 (13.3)                       | <10 <sup>6</sup>                   | <10 <sup>6</sup>                  | <10 <sup>6</sup>                                                                                                                                                                                                                                                                                                  | <10 <sup>6</sup>                  |
|                                                                                                                                                                                                                                                                                                                                                                                                                                                                                        |                  | 80 - <90               | 20               | 0 (0.0)                         | <10 <sup>6</sup>                   | <10 <sup>6</sup>                  | <10 <sup>6</sup>                                                                                                                                                                                                                                                                                                  | <10 <sup>6</sup>                  |
| <b>Length of Stay (months)</b>                                                                                                                                                                                                                                                                                                                                                                                                                                                         |                  |                        |                  |                                 |                                    |                                   |                                                                                                                                                                                                                                                                                                                   |                                   |
|                                                                                                                                                                                                                                                                                                                                                                                                                                                                                        |                  | 2019/20                |                  |                                 |                                    |                                   |                                                                                                                                                                                                                                                                                                                   |                                   |
|                                                                                                                                                                                                                                                                                                                                                                                                                                                                                        |                  | 1-<6                   | 2,686            | 293 (10.9)                      | <10 <sup>6</sup>                   | 19 (6.5)                          | 40 (13.7)                                                                                                                                                                                                                                                                                                         | 59 (20.1)                         |
|                                                                                                                                                                                                                                                                                                                                                                                                                                                                                        |                  | 6-<12                  | 1,697            | 208 (12.3)                      | 14 (6.7)                           | 34 (16.3)                         | 43 (20.7)                                                                                                                                                                                                                                                                                                         | 77 (37.0)                         |
|                                                                                                                                                                                                                                                                                                                                                                                                                                                                                        |                  | 12-<24                 | 1,422            | 222 (15.6)                      | 15 (6.8)                           | 37 (16.7)                         | 43 (19.4)                                                                                                                                                                                                                                                                                                         | 80 (36.0)                         |
|                                                                                                                                                                                                                                                                                                                                                                                                                                                                                        |                  | 24+                    | 1,350            | 323 (23.9)                      | 48 (14.9)                          | 103 (31.9)                        | 13 (4.0)                                                                                                                                                                                                                                                                                                          | 116 (35.9)                        |
| <b>Ethnic Group</b>                                                                                                                                                                                                                                                                                                                                                                                                                                                                    |                  |                        |                  |                                 |                                    |                                   |                                                                                                                                                                                                                                                                                                                   |                                   |
|                                                                                                                                                                                                                                                                                                                                                                                                                                                                                        |                  | 2019/20                |                  |                                 |                                    |                                   |                                                                                                                                                                                                                                                                                                                   |                                   |
|                                                                                                                                                                                                                                                                                                                                                                                                                                                                                        |                  | Mixed                  | 188              | 34 (18.1)                       | <10 <sup>6</sup>                   | <10 <sup>6</sup>                  | <10 <sup>6</sup>                                                                                                                                                                                                                                                                                                  | 11 (32.4)                         |
|                                                                                                                                                                                                                                                                                                                                                                                                                                                                                        |                  | Asian or Asian British | 310              | 37 (11.9)                       | <10 <sup>6</sup>                   | <10 <sup>6</sup>                  | <10 <sup>6</sup>                                                                                                                                                                                                                                                                                                  | 14 (37.8)                         |
|                                                                                                                                                                                                                                                                                                                                                                                                                                                                                        |                  | Black or Black British | 211              | 22 (10.4)                       | <10 <sup>6</sup>                   | <10 <sup>6</sup>                  | <10 <sup>6</sup>                                                                                                                                                                                                                                                                                                  | 11 (50.0)                         |
|                                                                                                                                                                                                                                                                                                                                                                                                                                                                                        |                  | Chinese and Other      | 85               | 11 (12.9)                       | <10 <sup>6</sup>                   | <10 <sup>6</sup>                  | <10 <sup>6</sup>                                                                                                                                                                                                                                                                                                  | <10 <sup>6</sup>                  |
|                                                                                                                                                                                                                                                                                                                                                                                                                                                                                        |                  | Unclassified           | 128              | 30 (23.4)                       | <10 <sup>6</sup>                   | 10 (33.3)                         | <10 <sup>6</sup>                                                                                                                                                                                                                                                                                                  | 12 (40.0)                         |

<sup>1</sup>Eligible for indicator; <sup>2</sup>Achieve in current prison; <sup>3</sup>Achieve in previous prison; <sup>4</sup>Overall achievement - either current or previous prison; <sup>5</sup>Declined indicator; <sup>6</sup>Suppressed (<10) to avoid disclosure

| Indicator              | Community achievement 2019/20: No direct comparison in QoF - just percentage of patients with MH diagnosis of schizophrenia, bipolar affective disorder and other psychoses who have record of BP and BMI in the last 12 months (80.28% and 74.40% respectively) |                                 |                              |                        |                      |                        |                            |                        |                      |                        |  |  |
|------------------------|------------------------------------------------------------------------------------------------------------------------------------------------------------------------------------------------------------------------------------------------------------------|---------------------------------|------------------------------|------------------------|----------------------|------------------------|----------------------------|------------------------|----------------------|------------------------|--|--|
|                        | Group: Mental health                                                                                                                                                                                                                                             |                                 | Fasting glucose (% eligible) |                        | HbA1c (% eligible)   |                        | Lipid profile (% eligible) |                        | (% eligible)         |                        |  |  |
| Variable               | Population                                                                                                                                                                                                                                                       | Eligible <sup>1</sup> (% popln) | Satisfy <sup>2</sup>         | Elsewhere <sup>3</sup> | Satisfy <sup>2</sup> | Elsewhere <sup>3</sup> | Satisfy <sup>2</sup>       | Elsewhere <sup>3</sup> | Satisfy <sup>2</sup> | Elsewhere <sup>3</sup> |  |  |
| <b>Year</b>            |                                                                                                                                                                                                                                                                  |                                 |                              |                        |                      |                        |                            |                        |                      |                        |  |  |
| 2017/18                | 21,677                                                                                                                                                                                                                                                           | 244 (1.1)                       | <10 <sup>6</sup>             | <10 <sup>6</sup>       | 75 (30.7)            | <10 <sup>6</sup>       | 57 (23.4)                  | <10 <sup>6</sup>       | 112 (45.9)           | 12 (4.9)               |  |  |
| 2018/19                | 22,099                                                                                                                                                                                                                                                           | 326 (1.5)                       | <10 <sup>6</sup>             | <10 <sup>6</sup>       | 31 (9.5)             | 11 (3.4)               | 28 (8.6)                   | 13 (4.0)               | 46 (14.1)            | 21 (6.4)               |  |  |
| 2019/20                | 25,811                                                                                                                                                                                                                                                           | 463 (1.8)                       | <10 <sup>6</sup>             | <10 <sup>6</sup>       | 29 (6.3)             | <10 <sup>6</sup>       | 22 (4.8)                   | <10 <sup>6</sup>       | 35 (7.6)             | <10 <sup>6</sup>       |  |  |
| <b>Prison</b>          |                                                                                                                                                                                                                                                                  |                                 |                              |                        |                      |                        |                            |                        |                      |                        |  |  |
| 2017/18                |                                                                                                                                                                                                                                                                  |                                 |                              |                        |                      |                        |                            |                        |                      |                        |  |  |
| Prison 1               | 1,323                                                                                                                                                                                                                                                            | 11 (0.8)                        | <10 <sup>6</sup>             | <10 <sup>6</sup>       | <10 <sup>6</sup>     | <10 <sup>6</sup>       | <10 <sup>6</sup>           | <10 <sup>6</sup>       | <10 <sup>6</sup>     | <10 <sup>6</sup>       |  |  |
| Prison 2               | 3,261                                                                                                                                                                                                                                                            | 36 (1.1)                        | <10 <sup>6</sup>             | <10 <sup>6</sup>       | 11 (30.6)            | <10 <sup>6</sup>       | <10 <sup>6</sup>           | <10 <sup>6</sup>       | 15 (41.7)            | <10 <sup>6</sup>       |  |  |
| Prison 3               | 2,623                                                                                                                                                                                                                                                            | 38 (1.4)                        | <10 <sup>6</sup>             | <10 <sup>6</sup>       | <10 <sup>6</sup>     | <10 <sup>6</sup>       | <10 <sup>6</sup>           | <10 <sup>6</sup>       | 12 (31.6)            | <10 <sup>6</sup>       |  |  |
| Prison 4               | 2,089                                                                                                                                                                                                                                                            | 22 (1.1)                        | <10 <sup>6</sup>             | <10 <sup>6</sup>       | <10 <sup>6</sup>     | <10 <sup>6</sup>       | <10 <sup>6</sup>           | <10 <sup>6</sup>       | <10 <sup>6</sup>     | <10 <sup>6</sup>       |  |  |
| Prison 5               | 637                                                                                                                                                                                                                                                              | <10 <sup>6</sup>                | <10 <sup>6</sup>             | <10 <sup>6</sup>       | <10 <sup>6</sup>     | <10 <sup>6</sup>       | <10 <sup>6</sup>           | <10 <sup>6</sup>       | <10 <sup>6</sup>     | <10 <sup>6</sup>       |  |  |
| Prison 6               | 1,552                                                                                                                                                                                                                                                            | <10 <sup>6</sup>                | <10 <sup>6</sup>             | <10 <sup>6</sup>       | <10 <sup>6</sup>     | <10 <sup>6</sup>       | <10 <sup>6</sup>           | <10 <sup>6</sup>       | <10 <sup>6</sup>     | <10 <sup>6</sup>       |  |  |
| Prison 7               | 635                                                                                                                                                                                                                                                              | 15 (2.4)                        | <10 <sup>6</sup>             | <10 <sup>6</sup>       | <10 <sup>6</sup>     | <10 <sup>6</sup>       | <10 <sup>6</sup>           | <10 <sup>6</sup>       | 11 (73.3)            | <10 <sup>6</sup>       |  |  |
| Prison 8               | 1,085                                                                                                                                                                                                                                                            | 27 (2.5)                        | <10 <sup>6</sup>             | <10 <sup>6</sup>       | 12 (44.4)            | <10 <sup>6</sup>       | <10 <sup>6</sup>           | <10 <sup>6</sup>       | 16 (59.3)            | <10 <sup>6</sup>       |  |  |
| Prison 9               | 981                                                                                                                                                                                                                                                              | 28 (2.9)                        | <10 <sup>6</sup>             | <10 <sup>6</sup>       | 17 (60.7)            | <10 <sup>6</sup>       | 16 (57.1)                  | <10 <sup>6</sup>       | 20 (71.4)            | <10 <sup>6</sup>       |  |  |
| Prison 10              | 2,523                                                                                                                                                                                                                                                            | 19 (0.8)                        | <10 <sup>6</sup>             | <10 <sup>6</sup>       | <10 <sup>6</sup>     | <10 <sup>6</sup>       | <10 <sup>6</sup>           | <10 <sup>6</sup>       | <10 <sup>6</sup>     | <10 <sup>6</sup>       |  |  |
| Prison 11              | 3,470                                                                                                                                                                                                                                                            | 23 (0.7)                        | <10 <sup>6</sup>             | <10 <sup>6</sup>       | <10 <sup>6</sup>     | <10 <sup>6</sup>       | <10 <sup>6</sup>           | <10 <sup>6</sup>       | <10 <sup>6</sup>     | <10 <sup>6</sup>       |  |  |
| Prison 12              | 815                                                                                                                                                                                                                                                              | <10 <sup>6</sup>                | <10 <sup>6</sup>             | <10 <sup>6</sup>       | <10 <sup>6</sup>     | <10 <sup>6</sup>       | <10 <sup>6</sup>           | <10 <sup>6</sup>       | <10 <sup>6</sup>     | <10 <sup>6</sup>       |  |  |
| Prison 13              | 683                                                                                                                                                                                                                                                              | 15 (2.2)                        | <10 <sup>6</sup>             | <10 <sup>6</sup>       | 11 (73.3)            | <10 <sup>6</sup>       | <10 <sup>6</sup>           | <10 <sup>6</sup>       | 11 (73.3)            | <10 <sup>6</sup>       |  |  |
| 2018/19                |                                                                                                                                                                                                                                                                  |                                 |                              |                        |                      |                        |                            |                        |                      |                        |  |  |
| Prison 1               | 1,333                                                                                                                                                                                                                                                            | 16 (1.2)                        | <10 <sup>6</sup>             | <10 <sup>6</sup>       | <10 <sup>6</sup>     | <10 <sup>6</sup>       | <10 <sup>6</sup>           | <10 <sup>6</sup>       | <10 <sup>6</sup>     | <10 <sup>6</sup>       |  |  |
| Prison 2               | 2,705                                                                                                                                                                                                                                                            | 43 (1.6)                        | <10 <sup>6</sup>             | <10 <sup>6</sup>       | <10 <sup>6</sup>     | <10 <sup>6</sup>       | <10 <sup>6</sup>           | <10 <sup>6</sup>       | <10 <sup>6</sup>     | <10 <sup>6</sup>       |  |  |
| Prison 3               | 2,522                                                                                                                                                                                                                                                            | 34 (1.3)                        | <10 <sup>6</sup>             | <10 <sup>6</sup>       | <10 <sup>6</sup>     | <10 <sup>6</sup>       | <10 <sup>6</sup>           | <10 <sup>6</sup>       | <10 <sup>6</sup>     | <10 <sup>6</sup>       |  |  |
| Prison 4               | 2,349                                                                                                                                                                                                                                                            | 37 (1.6)                        | <10 <sup>6</sup>             | <10 <sup>6</sup>       | <10 <sup>6</sup>     | <10 <sup>6</sup>       | <10 <sup>6</sup>           | <10 <sup>6</sup>       | <10 <sup>6</sup>     | <10 <sup>6</sup>       |  |  |
| Prison 5               | 676                                                                                                                                                                                                                                                              | <10 <sup>6</sup>                | <10 <sup>6</sup>             | <10 <sup>6</sup>       | <10 <sup>6</sup>     | <10 <sup>6</sup>       | <10 <sup>6</sup>           | <10 <sup>6</sup>       | <10 <sup>6</sup>     | <10 <sup>6</sup>       |  |  |
| Prison 6               | 1,513                                                                                                                                                                                                                                                            | <10 <sup>6</sup>                | <10 <sup>6</sup>             | <10 <sup>6</sup>       | <10 <sup>6</sup>     | <10 <sup>6</sup>       | <10 <sup>6</sup>           | <10 <sup>6</sup>       | <10 <sup>6</sup>     | <10 <sup>6</sup>       |  |  |
| Prison 7               | 654                                                                                                                                                                                                                                                              | 45 (6.9)                        | <10 <sup>6</sup>             | <10 <sup>6</sup>       | <10 <sup>6</sup>     | <10 <sup>6</sup>       | <10 <sup>6</sup>           | <10 <sup>6</sup>       | <10 <sup>6</sup>     | <10 <sup>6</sup>       |  |  |
| Prison 8               | 1,148                                                                                                                                                                                                                                                            | 30 (2.6)                        | <10 <sup>6</sup>             | <10 <sup>6</sup>       | <10 <sup>6</sup>     | <10 <sup>6</sup>       | <10 <sup>6</sup>           | <10 <sup>6</sup>       | <10 <sup>6</sup>     | <10 <sup>6</sup>       |  |  |
| Prison 9               | 996                                                                                                                                                                                                                                                              | 28 (2.8)                        | <10 <sup>6</sup>             | <10 <sup>6</sup>       | <10 <sup>6</sup>     | <10 <sup>6</sup>       | <10 <sup>6</sup>           | <10 <sup>6</sup>       | <10 <sup>6</sup>     | <10 <sup>6</sup>       |  |  |
| Prison 10              | 2,717                                                                                                                                                                                                                                                            | <10 <sup>6</sup>                | <10 <sup>6</sup>             | <10 <sup>6</sup>       | <10 <sup>6</sup>     | <10 <sup>6</sup>       | <10 <sup>6</sup>           | <10 <sup>6</sup>       | <10 <sup>6</sup>     | <10 <sup>6</sup>       |  |  |
| Prison 11              | 4,020                                                                                                                                                                                                                                                            | 73 (1.8)                        | <10 <sup>6</sup>             | <10 <sup>6</sup>       | <10 <sup>6</sup>     | <10 <sup>6</sup>       | <10 <sup>6</sup>           | <10 <sup>6</sup>       | <10 <sup>6</sup>     | <10 <sup>6</sup>       |  |  |
| Prison 12              | 792                                                                                                                                                                                                                                                              | <10 <sup>6</sup>                | <10 <sup>6</sup>             | <10 <sup>6</sup>       | <10 <sup>6</sup>     | <10 <sup>6</sup>       | <10 <sup>6</sup>           | <10 <sup>6</sup>       | <10 <sup>6</sup>     | <10 <sup>6</sup>       |  |  |
| Prison 13              | 674                                                                                                                                                                                                                                                              | 17 (2.5)                        | <10 <sup>6</sup>             | <10 <sup>6</sup>       | <10 <sup>6</sup>     | <10 <sup>6</sup>       | <10 <sup>6</sup>           | <10 <sup>6</sup>       | <10 <sup>6</sup>     | <10 <sup>6</sup>       |  |  |
| 2019/20                |                                                                                                                                                                                                                                                                  |                                 |                              |                        |                      |                        |                            |                        |                      |                        |  |  |
| Prison 1               | 1,410                                                                                                                                                                                                                                                            | 16 (1.1)                        | <10 <sup>6</sup>             | <10 <sup>6</sup>       | <10 <sup>6</sup>     | <10 <sup>6</sup>       | <10 <sup>6</sup>           | <10 <sup>6</sup>       | <10 <sup>6</sup>     | <10 <sup>6</sup>       |  |  |
| Prison 2               | 2,979                                                                                                                                                                                                                                                            | 43 (1.4)                        | <10 <sup>6</sup>             | <10 <sup>6</sup>       | <10 <sup>6</sup>     | <10 <sup>6</sup>       | <10 <sup>6</sup>           | <10 <sup>6</sup>       | <10 <sup>6</sup>     | <10 <sup>6</sup>       |  |  |
| Prison 3               | 2,809                                                                                                                                                                                                                                                            | 55 (2.0)                        | <10 <sup>6</sup>             | <10 <sup>6</sup>       | <10 <sup>6</sup>     | <10 <sup>6</sup>       | <10 <sup>6</sup>           | <10 <sup>6</sup>       | <10 <sup>6</sup>     | <10 <sup>6</sup>       |  |  |
| Prison 4               | 2,651                                                                                                                                                                                                                                                            | 35 (1.3)                        | <10 <sup>6</sup>             | <10 <sup>6</sup>       | <10 <sup>6</sup>     | <10 <sup>6</sup>       | <10 <sup>6</sup>           | <10 <sup>6</sup>       | <10 <sup>6</sup>     | <10 <sup>6</sup>       |  |  |
| Prison 5               | 616                                                                                                                                                                                                                                                              | <10 <sup>6</sup>                | <10 <sup>6</sup>             | <10 <sup>6</sup>       | <10 <sup>6</sup>     | <10 <sup>6</sup>       | <10 <sup>6</sup>           | <10 <sup>6</sup>       | <10 <sup>6</sup>     | <10 <sup>6</sup>       |  |  |
| Prison 6               | 1,533                                                                                                                                                                                                                                                            | <10 <sup>6</sup>                | <10 <sup>6</sup>             | <10 <sup>6</sup>       | <10 <sup>6</sup>     | <10 <sup>6</sup>       | <10 <sup>6</sup>           | <10 <sup>6</sup>       | <10 <sup>6</sup>     | <10 <sup>6</sup>       |  |  |
| Prison 7               | 860                                                                                                                                                                                                                                                              | 75 (8.7)                        | <10 <sup>6</sup>             | <10 <sup>6</sup>       | <10 <sup>6</sup>     | <10 <sup>6</sup>       | <10 <sup>6</sup>           | <10 <sup>6</sup>       | <10 <sup>6</sup>     | <10 <sup>6</sup>       |  |  |
| Prison 8               | 1,385                                                                                                                                                                                                                                                            | 38 (2.7)                        | <10 <sup>6</sup>             | <10 <sup>6</sup>       | <10 <sup>6</sup>     | <10 <sup>6</sup>       | <10 <sup>6</sup>           | <10 <sup>6</sup>       | <10 <sup>6</sup>     | <10 <sup>6</sup>       |  |  |
| Prison 9               | 1,092                                                                                                                                                                                                                                                            | 31 (2.8)                        | <10 <sup>6</sup>             | <10 <sup>6</sup>       | 12 (38.7)            | <10 <sup>6</sup>       | 12 (38.7)                  | <10 <sup>6</sup>       | 10 (32.3)            | <10 <sup>6</sup>       |  |  |
| Prison 10              | 3,577                                                                                                                                                                                                                                                            | 38 (1.1)                        | <10 <sup>6</sup>             | <10 <sup>6</sup>       | <10 <sup>6</sup>     | <10 <sup>6</sup>       | <10 <sup>6</sup>           | <10 <sup>6</sup>       | <10 <sup>6</sup>     | <10 <sup>6</sup>       |  |  |
| Prison 11              | 5,348                                                                                                                                                                                                                                                            | 97 (1.8)                        | <10 <sup>6</sup>             | <10 <sup>6</sup>       | <10 <sup>6</sup>     | <10 <sup>6</sup>       | <10 <sup>6</sup>           | <10 <sup>6</sup>       | <10 <sup>6</sup>     | <10 <sup>6</sup>       |  |  |
| Prison 12              | 805                                                                                                                                                                                                                                                              | <10 <sup>6</sup>                | <10 <sup>6</sup>             | <10 <sup>6</sup>       | <10 <sup>6</sup>     | <10 <sup>6</sup>       | <10 <sup>6</sup>           | <10 <sup>6</sup>       | <10 <sup>6</sup>     | <10 <sup>6</sup>       |  |  |
| Prison 13              | 746                                                                                                                                                                                                                                                              | 21 (2.8)                        | <10 <sup>6</sup>             | <10 <sup>6</sup>       | <10 <sup>6</sup>     | <10 <sup>6</sup>       | <10 <sup>6</sup>           | <10 <sup>6</sup>       | <10 <sup>6</sup>     | <10 <sup>6</sup>       |  |  |
| <b>Prison category</b> |                                                                                                                                                                                                                                                                  |                                 |                              |                        |                      |                        |                            |                        |                      |                        |  |  |
| 2017/18                |                                                                                                                                                                                                                                                                  |                                 |                              |                        |                      |                        |                            |                        |                      |                        |  |  |
| A                      | 1,664                                                                                                                                                                                                                                                            | 43 (2.6)                        | <10 <sup>6</sup>             | <10 <sup>6</sup>       | 28 (65.1)            | <10 <sup>6</sup>       | 25 (58.1)                  | <10 <sup>6</sup>       | 31 (72.1)            | <10 <sup>6</sup>       |  |  |
| B                      | 9,254                                                                                                                                                                                                                                                            | 78 (0.8)                        | <10 <sup>6</sup>             | <10 <sup>6</sup>       | 14 (17.9)            | <10 <sup>6</sup>       | <10 <sup>6</sup>           | <10 <sup>6</sup>       | 28 (35.9)            | <10 <sup>6</sup>       |  |  |
| C                      | 6,035                                                                                                                                                                                                                                                            | 71 (1.2)                        | <10 <sup>6</sup>             | <10 <sup>6</sup>       | 12 (16.9)            | <10 <sup>6</sup>       | 13 (18.3)                  | <10 <sup>6</sup>       | 23 (32.4)            | <10 <sup>6</sup>       |  |  |
| Closed                 | 1,720                                                                                                                                                                                                                                                            | 42 (2.4)                        | <10 <sup>6</sup>             | <10 <sup>6</sup>       | 19 (45.2)            | <10 <sup>6</sup>       | 12 (28.6)                  | <10 <sup>6</sup>       | 27 (64.3)            | <10 <sup>6</sup>       |  |  |
| D                      | 2,189                                                                                                                                                                                                                                                            | <10 <sup>6</sup>                | <10 <sup>6</sup>             | <10 <sup>6</sup>       | <10 <sup>6</sup>     | <10 <sup>6</sup>       | <10 <sup>6</sup>           | <10 <sup>6</sup>       | <10 <sup>6</sup>     | <10 <sup>6</sup>       |  |  |
| YOI                    | 815                                                                                                                                                                                                                                                              | <10 <sup>6</sup>                | <10 <sup>6</sup>             | <10 <sup>6</sup>       | <10 <sup>6</sup>     | <10 <sup>6</sup>       | <10 <sup>6</sup>           | <10 <sup>6</sup>       | <10 <sup>6</sup>     | <10 <sup>6</sup>       |  |  |
| 2018/19                |                                                                                                                                                                                                                                                                  |                                 |                              |                        |                      |                        |                            |                        |                      |                        |  |  |
| A                      | 1,670                                                                                                                                                                                                                                                            | 45 (2.7)                        | <10 <sup>6</sup>             | <10 <sup>6</sup>       | 15 (33.3)            | <10 <sup>6</sup>       | 14 (31.1)                  | <10 <sup>6</sup>       | 14 (31.1)            | <10 <sup>6</sup>       |  |  |
| B                      | 9,442                                                                                                                                                                                                                                                            | 116 (1.2)                       | <10 <sup>6</sup>             | <10 <sup>6</sup>       | <10 <sup>6</sup>     | <10 <sup>6</sup>       | <10 <sup>6</sup>           | <10 <sup>6</sup>       | <10 <sup>6</sup>     | <10 <sup>6</sup>       |  |  |
| C                      | 6,204                                                                                                                                                                                                                                                            | 87 (1.4)                        | <10 <sup>6</sup>             | <10 <sup>6</sup>       | <10 <sup>6</sup>     | <10 <sup>6</sup>       | <10 <sup>6</sup>           | <10 <sup>6</sup>       | 15 (17.2)            | <10 <sup>6</sup>       |  |  |
| Closed                 | 1,802                                                                                                                                                                                                                                                            | 75 (4.2)                        | <10 <sup>6</sup>             | <10 <sup>6</sup>       | <10 <sup>6</sup>     | <10 <sup>6</sup>       | <10 <sup>6</sup>           | <10 <sup>6</sup>       | 12 (16.0)            | <10 <sup>6</sup>       |  |  |
| D                      | 2,189                                                                                                                                                                                                                                                            | <10 <sup>6</sup>                | <10 <sup>6</sup>             | <10 <sup>6</sup>       | <10 <sup>6</sup>     | <10 <sup>6</sup>       | <10 <sup>6</sup>           | <10 <sup>6</sup>       | <10 <sup>6</sup>     | <10 <sup>6</sup>       |  |  |
| YOI                    | 792                                                                                                                                                                                                                                                              | <10 <sup>6</sup>                | <10 <sup>6</sup>             | <10 <sup>6</sup>       | <10 <sup>6</sup>     | <10 <sup>6</sup>       | <10 <sup>6</sup>           | <10 <sup>6</sup>       | <10 <sup>6</sup>     | <10 <sup>6</sup>       |  |  |
| 2019/20                |                                                                                                                                                                                                                                                                  |                                 |                              |                        |                      |                        |                            |                        |                      |                        |  |  |
| A                      | 1,838                                                                                                                                                                                                                                                            | 52 (2.8)                        | <10 <sup>6</sup>             | <10 <sup>6</sup>       | 14 (26.9)            | <10 <sup>6</sup>       | 14 (26.9)                  | <10 <sup>6</sup>       | 13 (25.0)            | <10 <sup>6</sup>       |  |  |
| B                      | 11,904                                                                                                                                                                                                                                                           | 178 (1.5)                       | <10 <sup>6</sup>             | <10 <sup>6</sup>       | <10 <sup>6</sup>     | <10 <sup>6</sup>       | <10 <sup>6</sup>           | <10 <sup>6</sup>       | <10 <sup>6</sup>     | <10 <sup>6</sup>       |  |  |
| C                      | 6,870                                                                                                                                                                                                                                                            | 106 (1.5)                       | <10 <sup>6</sup>             | <10 <sup>6</sup>       | <10 <sup>6</sup>     | <10 <sup>6</sup>       | <10 <sup>6</sup>           | <10 <sup>6</sup>       | <10 <sup>6</sup>     | <10 <sup>6</sup>       |  |  |
| Closed                 | 2,245                                                                                                                                                                                                                                                            | 113 (5.0)                       | <10 <sup>6</sup>             | <10 <sup>6</sup>       | <10 <sup>6</sup>     | <10 <sup>6</sup>       | <10 <sup>6</sup>           | <10 <sup>6</sup>       | <10 <sup>6</sup>     | <10 <sup>6</sup>       |  |  |
| D                      | 2,149                                                                                                                                                                                                                                                            | 11 (0.5)                        | <10 <sup>6</sup>             | <10 <sup>6</sup>       | <10 <sup>6</sup>     | <10 <sup>6</sup>       | <10 <sup>6</sup>           | <10 <sup>6</sup>       | <10 <sup>6</sup>     | <10 <sup>6</sup>       |  |  |
| YOI                    | 805                                                                                                                                                                                                                                                              | <10 <sup>6</sup>                | <10 <sup>6</sup>             | <10 <sup>6</sup>       | <10 <sup>6</sup>     | <10 <sup>6</sup>       | <10 <sup>6</sup>           | <10 <sup>6</sup>       | <10 <sup>6</sup>     | <10 <sup>6</sup>       |  |  |

<sup>1</sup>Eligible for indicator; <sup>2</sup>Achieve in current prison; <sup>3</sup>Achieve in previous prison; <sup>4</sup>Overall achievement - either current or previous prison; <sup>5</sup>Declined indicator; <sup>6</sup>Suppressed (<10) to avoid disclosure

| The proportion of people who have received three or more prescriptions for an antipsychotic in the preceding 12 months, and who have a record of blood testing (fasting glucose, HbA1c, lipid profile, urea and electrolytes, full blood count, liver function tests), body mass index and blood pressure |                      |                  |                               | Community achievement 2019/20: No direct comparison in QOF - just percentage of patients with MH diagnosis of schizophrenia, bipolar affective disorder and other psychoses who have record of BP and BMI in the last 12 months (80.28% and 74.40% respectively) |                             |                        |                      |                        |                       |                             |                        |
|-----------------------------------------------------------------------------------------------------------------------------------------------------------------------------------------------------------------------------------------------------------------------------------------------------------|----------------------|------------------|-------------------------------|------------------------------------------------------------------------------------------------------------------------------------------------------------------------------------------------------------------------------------------------------------------|-----------------------------|------------------------|----------------------|------------------------|-----------------------|-----------------------------|------------------------|
| Indicator                                                                                                                                                                                                                                                                                                 | Group: Mental health |                  |                               |                                                                                                                                                                                                                                                                  |                             |                        |                      |                        |                       |                             |                        |
|                                                                                                                                                                                                                                                                                                           | Variable             | Eligible         | Full blood count (% eligible) |                                                                                                                                                                                                                                                                  | Liver function (% eligible) |                        | BMI (% eligible)     |                        | Declined <sup>5</sup> | Blood Pressure (% eligible) |                        |
|                                                                                                                                                                                                                                                                                                           |                      |                  | Satisfy <sup>2</sup>          | Elsewhere <sup>3</sup>                                                                                                                                                                                                                                           | Satisfy <sup>2</sup>        | Elsewhere <sup>3</sup> | Satisfy <sup>2</sup> | Elsewhere <sup>3</sup> |                       | Satisfy <sup>2</sup>        | Elsewhere <sup>3</sup> |
| Year                                                                                                                                                                                                                                                                                                      |                      |                  |                               |                                                                                                                                                                                                                                                                  |                             |                        |                      |                        |                       |                             |                        |
| 2017/18                                                                                                                                                                                                                                                                                                   |                      | 244              | 116 (47.5)                    | 11 (4.5)                                                                                                                                                                                                                                                         | 107 (43.9)                  | <10 <sup>6</sup>       | 179 (73.4)           | <10 <sup>6</sup>       | <10 <sup>6</sup>      | 203 (83.2)                  | <10 <sup>6</sup>       |
| 2018/19                                                                                                                                                                                                                                                                                                   |                      | 326              | 49 (15.0)                     | 22 (6.7)                                                                                                                                                                                                                                                         | 40 (12.3)                   | 14 (4.3)               | 95 (29.1)            | 18 (5.5)               | <10 <sup>6</sup>      | 101 (31.0)                  | 18 (5.5)               |
| 2019/20                                                                                                                                                                                                                                                                                                   |                      | 463              | 37 (8.0)                      | <10 <sup>6</sup>                                                                                                                                                                                                                                                 | 17 (3.7)                    | <10 <sup>6</sup>       | 20 (4.3)             | 11 (2.4)               | <10 <sup>6</sup>      | 62 (13.4)                   | <10 <sup>6</sup>       |
| <b>Prison</b>                                                                                                                                                                                                                                                                                             |                      |                  |                               |                                                                                                                                                                                                                                                                  |                             |                        |                      |                        |                       |                             |                        |
| 2017/18                                                                                                                                                                                                                                                                                                   | Prison 1             | 11               | <10 <sup>6</sup>              | <10 <sup>6</sup>                                                                                                                                                                                                                                                 | <10 <sup>6</sup>            | <10 <sup>6</sup>       | 10 (90.9)            | <10 <sup>6</sup>       | <10 <sup>6</sup>      | 11 (100.0)                  | <10 <sup>6</sup>       |
|                                                                                                                                                                                                                                                                                                           | Prison 2             | 36               | 14 (38.9)                     | <10 <sup>6</sup>                                                                                                                                                                                                                                                 | 12 (33.3)                   | <10 <sup>6</sup>       | 27 (75.0)            | <10 <sup>6</sup>       | <10 <sup>6</sup>      | 31 (86.1)                   | <10 <sup>6</sup>       |
|                                                                                                                                                                                                                                                                                                           | Prison 3             | 38               | 14 (36.8)                     | <10 <sup>6</sup>                                                                                                                                                                                                                                                 | 10 (26.3)                   | <10 <sup>6</sup>       | 30 (78.9)            | <10 <sup>6</sup>       | <10 <sup>6</sup>      | 34 (89.5)                   | <10 <sup>6</sup>       |
|                                                                                                                                                                                                                                                                                                           | Prison 4             | 22               | <10 <sup>6</sup>              | <10 <sup>6</sup>                                                                                                                                                                                                                                                 | <10 <sup>6</sup>            | <10 <sup>6</sup>       | 17 (77.3)            | <10 <sup>6</sup>       | <10 <sup>6</sup>      | 10 (45.5)                   | <10 <sup>6</sup>       |
|                                                                                                                                                                                                                                                                                                           | Prison 5             | <10 <sup>6</sup> | <10 <sup>6</sup>              | <10 <sup>6</sup>                                                                                                                                                                                                                                                 | <10 <sup>6</sup>            | <10 <sup>6</sup>       | <10 <sup>6</sup>     | <10 <sup>6</sup>       | <10 <sup>6</sup>      | <10 <sup>6</sup>            | <10 <sup>6</sup>       |
|                                                                                                                                                                                                                                                                                                           | Prison 6             | <10 <sup>6</sup> | <10 <sup>6</sup>              | <10 <sup>6</sup>                                                                                                                                                                                                                                                 | <10 <sup>6</sup>            | <10 <sup>6</sup>       | <10 <sup>6</sup>     | <10 <sup>6</sup>       | <10 <sup>6</sup>      | <10 <sup>6</sup>            | <10 <sup>6</sup>       |
|                                                                                                                                                                                                                                                                                                           | Prison 7             | 15               | 11 (73.3)                     | <10 <sup>6</sup>                                                                                                                                                                                                                                                 | 11 (73.3)                   | <10 <sup>6</sup>       | 10 (66.7)            | <10 <sup>6</sup>       | <10 <sup>6</sup>      | 15 (100.0)                  | <10 <sup>6</sup>       |
|                                                                                                                                                                                                                                                                                                           | Prison 8             | 27               | 15 (55.6)                     | <10 <sup>6</sup>                                                                                                                                                                                                                                                 | 14 (51.9)                   | <10 <sup>6</sup>       | 24 (88.9)            | <10 <sup>6</sup>       | <10 <sup>6</sup>      | 25 (92.6)                   | <10 <sup>6</sup>       |
|                                                                                                                                                                                                                                                                                                           | Prison 9             | 28               | 22 (78.6)                     | <10 <sup>6</sup>                                                                                                                                                                                                                                                 | 20 (71.4)                   | <10 <sup>6</sup>       | 15 (53.6)            | <10 <sup>6</sup>       | <10 <sup>6</sup>      | 24 (85.7)                   | <10 <sup>6</sup>       |
|                                                                                                                                                                                                                                                                                                           | Prison 10            | 19               | <10 <sup>6</sup>              | <10 <sup>6</sup>                                                                                                                                                                                                                                                 | <10 <sup>6</sup>            | <10 <sup>6</sup>       | 12 (63.2)            | <10 <sup>6</sup>       | <10 <sup>6</sup>      | 15 (78.9)                   | <10 <sup>6</sup>       |
|                                                                                                                                                                                                                                                                                                           | Prison 11            | 23               | <10 <sup>6</sup>              | <10 <sup>6</sup>                                                                                                                                                                                                                                                 | <10 <sup>6</sup>            | <10 <sup>6</sup>       | 16 (69.6)            | <10 <sup>6</sup>       | <10 <sup>6</sup>      | 18 (78.3)                   | <10 <sup>6</sup>       |
|                                                                                                                                                                                                                                                                                                           | Prison 12            | <10 <sup>6</sup> | <10 <sup>6</sup>              | <10 <sup>6</sup>                                                                                                                                                                                                                                                 | <10 <sup>6</sup>            | <10 <sup>6</sup>       | <10 <sup>6</sup>     | <10 <sup>6</sup>       | <10 <sup>6</sup>      | <10 <sup>6</sup>            | <10 <sup>6</sup>       |
|                                                                                                                                                                                                                                                                                                           | Prison 13            | 15               | 11 (73.3)                     | <10 <sup>6</sup>                                                                                                                                                                                                                                                 | 11 (73.3)                   | <10 <sup>6</sup>       | 12 (80.0)            | <10 <sup>6</sup>       | <10 <sup>6</sup>      | 13 (86.7)                   | <10 <sup>6</sup>       |
| 2018/19                                                                                                                                                                                                                                                                                                   | Prison 1             | 16               | <10 <sup>6</sup>              | <10 <sup>6</sup>                                                                                                                                                                                                                                                 | <10 <sup>6</sup>            | <10 <sup>6</sup>       | <10 <sup>6</sup>     | <10 <sup>6</sup>       | <10 <sup>6</sup>      | <10 <sup>6</sup>            | <10 <sup>6</sup>       |
|                                                                                                                                                                                                                                                                                                           | Prison 2             | 43               | <10 <sup>6</sup>              | <10 <sup>6</sup>                                                                                                                                                                                                                                                 | <10 <sup>6</sup>            | <10 <sup>6</sup>       | <10 <sup>6</sup>     | <10 <sup>6</sup>       | <10 <sup>6</sup>      | <10 <sup>6</sup>            | <10 <sup>6</sup>       |
|                                                                                                                                                                                                                                                                                                           | Prison 3             | 34               | 10 (29.4)                     | <10 <sup>6</sup>                                                                                                                                                                                                                                                 | <10 <sup>6</sup>            | <10 <sup>6</sup>       | 28 (82.4)            | <10 <sup>6</sup>       | <10 <sup>6</sup>      | 29 (85.3)                   | <10 <sup>6</sup>       |
|                                                                                                                                                                                                                                                                                                           | Prison 4             | 37               | <10 <sup>6</sup>              | <10 <sup>6</sup>                                                                                                                                                                                                                                                 | <10 <sup>6</sup>            | <10 <sup>6</sup>       | 10 (27.0)            | <10 <sup>6</sup>       | <10 <sup>6</sup>      | 11 (29.7)                   | <10 <sup>6</sup>       |
|                                                                                                                                                                                                                                                                                                           | Prison 5             | <10 <sup>6</sup> | <10 <sup>6</sup>              | <10 <sup>6</sup>                                                                                                                                                                                                                                                 | <10 <sup>6</sup>            | <10 <sup>6</sup>       | <10 <sup>6</sup>     | <10 <sup>6</sup>       | <10 <sup>6</sup>      | <10 <sup>6</sup>            | <10 <sup>6</sup>       |
|                                                                                                                                                                                                                                                                                                           | Prison 6             | <10 <sup>6</sup> | <10 <sup>6</sup>              | <10 <sup>6</sup>                                                                                                                                                                                                                                                 | <10 <sup>6</sup>            | <10 <sup>6</sup>       | <10 <sup>6</sup>     | <10 <sup>6</sup>       | <10 <sup>6</sup>      | <10 <sup>6</sup>            | <10 <sup>6</sup>       |
|                                                                                                                                                                                                                                                                                                           | Prison 7             | 45               | <10 <sup>6</sup>              | <10 <sup>6</sup>                                                                                                                                                                                                                                                 | <10 <sup>6</sup>            | <10 <sup>6</sup>       | 11 (24.4)            | <10 <sup>6</sup>       | <10 <sup>6</sup>      | 12 (26.7)                   | <10 <sup>6</sup>       |
|                                                                                                                                                                                                                                                                                                           | Prison 8             | 30               | <10 <sup>6</sup>              | <10 <sup>6</sup>                                                                                                                                                                                                                                                 | <10 <sup>6</sup>            | <10 <sup>6</sup>       | <10 <sup>6</sup>     | <10 <sup>6</sup>       | <10 <sup>6</sup>      | <10 <sup>6</sup>            | <10 <sup>6</sup>       |
|                                                                                                                                                                                                                                                                                                           | Prison 9             | 28               | <10 <sup>6</sup>              | <10 <sup>6</sup>                                                                                                                                                                                                                                                 | <10 <sup>6</sup>            | <10 <sup>6</sup>       | 10 (35.7)            | <10 <sup>6</sup>       | <10 <sup>6</sup>      | 12 (42.9)                   | <10 <sup>6</sup>       |
|                                                                                                                                                                                                                                                                                                           | Prison 10            | <10 <sup>6</sup> | <10 <sup>6</sup>              | <10 <sup>6</sup>                                                                                                                                                                                                                                                 | <10 <sup>6</sup>            | <10 <sup>6</sup>       | <10 <sup>6</sup>     | <10 <sup>6</sup>       | <10 <sup>6</sup>      | <10 <sup>6</sup>            | <10 <sup>6</sup>       |
|                                                                                                                                                                                                                                                                                                           | Prison 11            | 73               | <10 <sup>6</sup>              | <10 <sup>6</sup>                                                                                                                                                                                                                                                 | <10 <sup>6</sup>            | <10 <sup>6</sup>       | <10 <sup>6</sup>     | <10 <sup>6</sup>       | <10 <sup>6</sup>      | <10 <sup>6</sup>            | <10 <sup>6</sup>       |
|                                                                                                                                                                                                                                                                                                           | Prison 12            | <10 <sup>6</sup> | <10 <sup>6</sup>              | <10 <sup>6</sup>                                                                                                                                                                                                                                                 | <10 <sup>6</sup>            | <10 <sup>6</sup>       | <10 <sup>6</sup>     | <10 <sup>6</sup>       | <10 <sup>6</sup>      | <10 <sup>6</sup>            | <10 <sup>6</sup>       |
|                                                                                                                                                                                                                                                                                                           | Prison 13            | 17               | <10 <sup>6</sup>              | <10 <sup>6</sup>                                                                                                                                                                                                                                                 | <10 <sup>6</sup>            | <10 <sup>6</sup>       | <10 <sup>6</sup>     | <10 <sup>6</sup>       | <10 <sup>6</sup>      | <10 <sup>6</sup>            | <10 <sup>6</sup>       |
| 2019/20                                                                                                                                                                                                                                                                                                   | Prison 1             | 16               | <10 <sup>6</sup>              | <10 <sup>6</sup>                                                                                                                                                                                                                                                 | <10 <sup>6</sup>            | <10 <sup>6</sup>       | <10 <sup>6</sup>     | <10 <sup>6</sup>       | <10 <sup>6</sup>      | <10 <sup>6</sup>            | <10 <sup>6</sup>       |
|                                                                                                                                                                                                                                                                                                           | Prison 2             | 43               | <10 <sup>6</sup>              | <10 <sup>6</sup>                                                                                                                                                                                                                                                 | <10 <sup>6</sup>            | <10 <sup>6</sup>       | <10 <sup>6</sup>     | <10 <sup>6</sup>       | <10 <sup>6</sup>      | <10 <sup>6</sup>            | <10 <sup>6</sup>       |
|                                                                                                                                                                                                                                                                                                           | Prison 3             | 55               | <10 <sup>6</sup>              | <10 <sup>6</sup>                                                                                                                                                                                                                                                 | <10 <sup>6</sup>            | <10 <sup>6</sup>       | <10 <sup>6</sup>     | <10 <sup>6</sup>       | <10 <sup>6</sup>      | <10 <sup>6</sup>            | <10 <sup>6</sup>       |
|                                                                                                                                                                                                                                                                                                           | Prison 4             | 35               | <10 <sup>6</sup>              | <10 <sup>6</sup>                                                                                                                                                                                                                                                 | <10 <sup>6</sup>            | <10 <sup>6</sup>       | <10 <sup>6</sup>     | <10 <sup>6</sup>       | <10 <sup>6</sup>      | <10 <sup>6</sup>            | <10 <sup>6</sup>       |
|                                                                                                                                                                                                                                                                                                           | Prison 5             | <10 <sup>6</sup> | <10 <sup>6</sup>              | <10 <sup>6</sup>                                                                                                                                                                                                                                                 | <10 <sup>6</sup>            | <10 <sup>6</sup>       | <10 <sup>6</sup>     | <10 <sup>6</sup>       | <10 <sup>6</sup>      | <10 <sup>6</sup>            | <10 <sup>6</sup>       |
|                                                                                                                                                                                                                                                                                                           | Prison 6             | <10 <sup>6</sup> | <10 <sup>6</sup>              | <10 <sup>6</sup>                                                                                                                                                                                                                                                 | <10 <sup>6</sup>            | <10 <sup>6</sup>       | <10 <sup>6</sup>     | <10 <sup>6</sup>       | <10 <sup>6</sup>      | <10 <sup>6</sup>            | <10 <sup>6</sup>       |
|                                                                                                                                                                                                                                                                                                           | Prison 7             | 75               | <10 <sup>6</sup>              | <10 <sup>6</sup>                                                                                                                                                                                                                                                 | <10 <sup>6</sup>            | <10 <sup>6</sup>       | <10 <sup>6</sup>     | <10 <sup>6</sup>       | <10 <sup>6</sup>      | <10 <sup>6</sup>            | <10 <sup>6</sup>       |
|                                                                                                                                                                                                                                                                                                           | Prison 8             | 38               | <10 <sup>6</sup>              | <10 <sup>6</sup>                                                                                                                                                                                                                                                 | <10 <sup>6</sup>            | <10 <sup>6</sup>       | <10 <sup>6</sup>     | <10 <sup>6</sup>       | <10 <sup>6</sup>      | <10 <sup>6</sup>            | <10 <sup>6</sup>       |
|                                                                                                                                                                                                                                                                                                           | Prison 9             | 31               | 12 (38.7)                     | <10 <sup>6</sup>                                                                                                                                                                                                                                                 | 11 (35.5)                   | <10 <sup>6</sup>       | 13 (41.9)            | <10 <sup>6</sup>       | <10 <sup>6</sup>      | 14 (45.2)                   | <10 <sup>6</sup>       |
|                                                                                                                                                                                                                                                                                                           | Prison 10            | 38               | <10 <sup>6</sup>              | <10 <sup>6</sup>                                                                                                                                                                                                                                                 | <10 <sup>6</sup>            | <10 <sup>6</sup>       | <10 <sup>6</sup>     | <10 <sup>6</sup>       | <10 <sup>6</sup>      | <10 <sup>6</sup>            | <10 <sup>6</sup>       |
|                                                                                                                                                                                                                                                                                                           | Prison 11            | 97               | <10 <sup>6</sup>              | <10 <sup>6</sup>                                                                                                                                                                                                                                                 | <10 <sup>6</sup>            | <10 <sup>6</sup>       | <10 <sup>6</sup>     | <10 <sup>6</sup>       | <10 <sup>6</sup>      | <10 <sup>6</sup>            | <10 <sup>6</sup>       |
|                                                                                                                                                                                                                                                                                                           | Prison 12            | <10 <sup>6</sup> | <10 <sup>6</sup>              | <10 <sup>6</sup>                                                                                                                                                                                                                                                 | <10 <sup>6</sup>            | <10 <sup>6</sup>       | <10 <sup>6</sup>     | <10 <sup>6</sup>       | <10 <sup>6</sup>      | <10 <sup>6</sup>            | <10 <sup>6</sup>       |
|                                                                                                                                                                                                                                                                                                           | Prison 13            | 21               | <10 <sup>6</sup>              | <10 <sup>6</sup>                                                                                                                                                                                                                                                 | <10 <sup>6</sup>            | <10 <sup>6</sup>       | <10 <sup>6</sup>     | <10 <sup>6</sup>       | <10 <sup>6</sup>      | <10 <sup>6</sup>            | <10 <sup>6</sup>       |
| <b>Prison category</b>                                                                                                                                                                                                                                                                                    |                      |                  |                               |                                                                                                                                                                                                                                                                  |                             |                        |                      |                        |                       |                             |                        |
| 2017/18                                                                                                                                                                                                                                                                                                   | A                    | 43               | 33 (76.7)                     | <10 <sup>6</sup>                                                                                                                                                                                                                                                 | 31 (72.1)                   | <10 <sup>6</sup>       | 27 (62.8)            | <10 <sup>6</sup>       | <10 <sup>6</sup>      | 37 (86.0)                   | <10 <sup>6</sup>       |
|                                                                                                                                                                                                                                                                                                           | B                    | 78               | 27 (34.6)                     | <10 <sup>6</sup>                                                                                                                                                                                                                                                 | 25 (32.1)                   | <10 <sup>6</sup>       | 55 (70.5)            | <10 <sup>6</sup>       | <10 <sup>6</sup>      | 64 (82.1)                   | <10 <sup>6</sup>       |
|                                                                                                                                                                                                                                                                                                           | C                    | 71               | 27 (38.0)                     | <10 <sup>6</sup>                                                                                                                                                                                                                                                 | 23 (32.4)                   | <10 <sup>6</sup>       | 57 (80.3)            | <10 <sup>6</sup>       | <10 <sup>6</sup>      | 55 (77.5)                   | <10 <sup>6</sup>       |
|                                                                                                                                                                                                                                                                                                           | Closed               | 42               | 26 (61.9)                     | <10 <sup>6</sup>                                                                                                                                                                                                                                                 | 25 (59.5)                   | <10 <sup>6</sup>       | 34 (81.0)            | <10 <sup>6</sup>       | <10 <sup>6</sup>      | 40 (95.2)                   | <10 <sup>6</sup>       |
|                                                                                                                                                                                                                                                                                                           | D                    | <10 <sup>6</sup> | <10 <sup>6</sup>              | <10 <sup>6</sup>                                                                                                                                                                                                                                                 | <10 <sup>6</sup>            | <10 <sup>6</sup>       | <10 <sup>6</sup>     | <10 <sup>6</sup>       | <10 <sup>6</sup>      | <10 <sup>6</sup>            | <10 <sup>6</sup>       |
|                                                                                                                                                                                                                                                                                                           | YOI                  | <10 <sup>6</sup> | <10 <sup>6</sup>              | <10 <sup>6</sup>                                                                                                                                                                                                                                                 | <10 <sup>6</sup>            | <10 <sup>6</sup>       | <10 <sup>6</sup>     | <10 <sup>6</sup>       | <10 <sup>6</sup>      | <10 <sup>6</sup>            | <10 <sup>6</sup>       |
| 2018/19                                                                                                                                                                                                                                                                                                   | A                    | 45               | 15 (33.3)                     | <10 <sup>6</sup>                                                                                                                                                                                                                                                 | 16 (35.6)                   | <10 <sup>6</sup>       | 18 (40.0)            | <10 <sup>6</sup>       | <10 <sup>6</sup>      | 19 (42.2)                   | <10 <sup>6</sup>       |
|                                                                                                                                                                                                                                                                                                           | B                    | 116              | <10 <sup>6</sup>              | <10 <sup>6</sup>                                                                                                                                                                                                                                                 | <10 <sup>6</sup>            | <10 <sup>6</sup>       | 16 (13.8)            | <10 <sup>6</sup>       | <10 <sup>6</sup>      | 17 (14.7)                   | <10 <sup>6</sup>       |
|                                                                                                                                                                                                                                                                                                           | C                    | 87               | 17 (19.5)                     | <10 <sup>6</sup>                                                                                                                                                                                                                                                 | <10 <sup>6</sup>            | <10 <sup>6</sup>       | 42 (48.3)            | <10 <sup>6</sup>       | <10 <sup>6</sup>      | 45 (51.7)                   | <10 <sup>6</sup>       |
|                                                                                                                                                                                                                                                                                                           | Closed               | 75               | 12 (16.0)                     | <10 <sup>6</sup>                                                                                                                                                                                                                                                 | 12 (16.0)                   | <10 <sup>6</sup>       | 19 (25.3)            | <10 <sup>6</sup>       | <10 <sup>6</sup>      | 20 (26.7)                   | <10 <sup>6</sup>       |
|                                                                                                                                                                                                                                                                                                           | D                    | <10 <sup>6</sup> | <10 <sup>6</sup>              | <10 <sup>6</sup>                                                                                                                                                                                                                                                 | <10 <sup>6</sup>            | <10 <sup>6</sup>       | <10 <sup>6</sup>     | <10 <sup>6</sup>       | <10 <sup>6</sup>      | <10 <sup>6</sup>            | <10 <sup>6</sup>       |
|                                                                                                                                                                                                                                                                                                           | YOI                  | <10 <sup>6</sup> | <10 <sup>6</sup>              | <10 <sup>6</sup>                                                                                                                                                                                                                                                 | <10 <sup>6</sup>            | <10 <sup>6</sup>       | <10 <sup>6</sup>     | <10 <sup>6</sup>       | <10 <sup>6</sup>      | <10 <sup>6</sup>            | <10 <sup>6</sup>       |
| 2019/20                                                                                                                                                                                                                                                                                                   | A                    | 52               | 15 (28.8)                     | <10 <sup>6</sup>                                                                                                                                                                                                                                                 | 12 (23.1)                   | <10 <sup>6</sup>       | 14 (26.9)            | <10 <sup>6</sup>       | <10 <sup>6</sup>      | 18 (34.6)                   | <10 <sup>6</sup>       |
|                                                                                                                                                                                                                                                                                                           | B                    | 178              | <10 <sup>6</sup>              | <10 <sup>6</sup>                                                                                                                                                                                                                                                 | <10 <sup>6</sup>            | <10 <sup>6</sup>       | <10 <sup>6</sup>     | <10 <sup>6</sup>       | <10 <sup>6</sup>      | 21 (11.8)                   | <10 <sup>6</sup>       |
|                                                                                                                                                                                                                                                                                                           | C                    | 106              | <10 <sup>6</sup>              | <10 <sup>6</sup>                                                                                                                                                                                                                                                 | <10 <sup>6</sup>            | <10 <sup>6</sup>       | <10 <sup>6</sup>     | <10 <sup>6</sup>       | <10 <sup>6</sup>      | <10 <sup>6</sup>            | <10 <sup>6</sup>       |
|                                                                                                                                                                                                                                                                                                           | Closed               | 113              | <10 <sup>6</sup>              | <10 <sup>6</sup>                                                                                                                                                                                                                                                 | <10 <sup>6</sup>            | <10 <sup>6</sup>       | <10 <sup>6</sup>     | <10 <sup>6</sup>       | <10 <sup>6</sup>      | 13 (11.5)                   | <10 <sup>6</sup>       |
|                                                                                                                                                                                                                                                                                                           | D                    | 11               | <10 <sup>6</sup>              | <10 <sup>6</sup>                                                                                                                                                                                                                                                 | <10 <sup>6</sup>            | <10 <sup>6</sup>       | <10 <sup>6</sup>     | <10 <sup>6</sup>       | <10 <sup>6</sup>      | <10 <sup>6</sup>            | <10 <sup>6</sup>       |
|                                                                                                                                                                                                                                                                                                           | YOI                  | <10 <sup>6</sup> | <10 <sup>6</sup>              | <10 <sup>6</sup>                                                                                                                                                                                                                                                 | <10 <sup>6</sup>            | <10 <sup>6</sup>       | <10 <sup>6</sup>     | <10 <sup>6</sup>       | <10 <sup>6</sup>      | <10 <sup>6</sup>            | <10 <sup>6</sup>       |

<sup>1</sup>Eligible for indicator; <sup>2</sup>Achieve in current prison; <sup>3</sup>Achieve in previous prison; <sup>4</sup>Overall achievement - either current or previous prison; <sup>5</sup>Declined indicator; <sup>6</sup>Suppressed (<10) to avoid disclosure

| Indicator                                                                                                                                                                                                                                                                                                 |                                | Community achievement 2019/20: No direct comparison in QOF - just percentage of patients with MH diagnosis of schizophrenia, bipolar affective disorder and other psychoses who have record of BP and BMI in the last 12 months (80.28% and 74.40% respectively) |                              |                        |                      |                        |                            |                        |                                    |                        |                  |
|-----------------------------------------------------------------------------------------------------------------------------------------------------------------------------------------------------------------------------------------------------------------------------------------------------------|--------------------------------|------------------------------------------------------------------------------------------------------------------------------------------------------------------------------------------------------------------------------------------------------------------|------------------------------|------------------------|----------------------|------------------------|----------------------------|------------------------|------------------------------------|------------------------|------------------|
| Group: Mental health                                                                                                                                                                                                                                                                                      |                                |                                                                                                                                                                                                                                                                  |                              |                        |                      |                        |                            |                        |                                    |                        |                  |
| The proportion of people who have received three or more prescriptions for an antipsychotic in the preceding 12 months, and who have a record of blood testing (fasting glucose, HbA1c, lipid profile, urea and electrolytes, full blood count, liver function tests), body mass index and blood pressure |                                |                                                                                                                                                                                                                                                                  |                              |                        |                      |                        |                            |                        |                                    |                        |                  |
| Variable                                                                                                                                                                                                                                                                                                  | Population                     | Eligible (% popln)                                                                                                                                                                                                                                               | Fasting glucose (% eligible) |                        | HbA1c (% eligible)   |                        | Lipid profile (% eligible) |                        | Urea and electrolytes (% eligible) |                        |                  |
|                                                                                                                                                                                                                                                                                                           |                                |                                                                                                                                                                                                                                                                  | Satisfy <sup>2</sup>         | Elsewhere <sup>3</sup> | Satisfy <sup>2</sup> | Elsewhere <sup>3</sup> | Satisfy <sup>2</sup>       | Elsewhere <sup>3</sup> | Satisfy <sup>2</sup>               | Elsewhere <sup>3</sup> |                  |
| <b>Gender</b>                                                                                                                                                                                                                                                                                             |                                |                                                                                                                                                                                                                                                                  |                              |                        |                      |                        |                            |                        |                                    |                        |                  |
| 2017/18                                                                                                                                                                                                                                                                                                   | F                              | 1,699                                                                                                                                                                                                                                                            | 42 (2.5)                     | <10 <sup>6</sup>       | <10 <sup>6</sup>     | 19 (45.2)              | <10 <sup>6</sup>           | 12 (28.6)              | <10 <sup>6</sup>                   | 27 (64.3)              | <10 <sup>6</sup> |
|                                                                                                                                                                                                                                                                                                           | M                              | 19,977                                                                                                                                                                                                                                                           | 202 (1.0)                    | <10 <sup>6</sup>       | <10 <sup>6</sup>     | 56 (27.7)              | <10 <sup>6</sup>           | 45 (22.3)              | <10 <sup>6</sup>                   | 85 (42.1)              | 11 (5.4)         |
| 2018/19                                                                                                                                                                                                                                                                                                   | F                              | 1,802                                                                                                                                                                                                                                                            | 75 (4.2)                     | <10 <sup>6</sup>       | <10 <sup>6</sup>     | <10 <sup>6</sup>       | <10 <sup>6</sup>           | <10 <sup>6</sup>       | <10 <sup>6</sup>                   | 12 (16.0)              | <10 <sup>6</sup> |
|                                                                                                                                                                                                                                                                                                           | M                              | 20,295                                                                                                                                                                                                                                                           | 251 (1.2)                    | <10 <sup>6</sup>       | <10 <sup>6</sup>     | 25 (10.0)              | 10 (4.0)                   | 24 (9.6)               | 11 (4.4)                           | 34 (13.5)              | 20 (8.0)         |
| 2019/20                                                                                                                                                                                                                                                                                                   | F                              | 1,376                                                                                                                                                                                                                                                            | 38 (2.8)                     | <10 <sup>6</sup>       | <10 <sup>6</sup>     | <10 <sup>6</sup>       | <10 <sup>6</sup>           | <10 <sup>6</sup>       | <10 <sup>6</sup>                   | <10 <sup>6</sup>       | <10 <sup>6</sup> |
|                                                                                                                                                                                                                                                                                                           | M                              | 23,570                                                                                                                                                                                                                                                           | 350 (1.5)                    | <10 <sup>6</sup>       | <10 <sup>6</sup>     | 25 (7.1)               | <10 <sup>6</sup>           | 18 (5.1)               | <10 <sup>6</sup>                   | 28 (8.0)               | <10 <sup>6</sup> |
| <b>Sentence Status</b>                                                                                                                                                                                                                                                                                    |                                |                                                                                                                                                                                                                                                                  |                              |                        |                      |                        |                            |                        |                                    |                        |                  |
| 2017/18                                                                                                                                                                                                                                                                                                   | .                              | 81                                                                                                                                                                                                                                                               | <10 <sup>6</sup>             | <10 <sup>6</sup>       | <10 <sup>6</sup>     | <10 <sup>6</sup>       | <10 <sup>6</sup>           | <10 <sup>6</sup>       | <10 <sup>6</sup>                   | <10 <sup>6</sup>       | <10 <sup>6</sup> |
|                                                                                                                                                                                                                                                                                                           | Absconded                      | <10 <sup>6</sup>                                                                                                                                                                                                                                                 | <10 <sup>6</sup>             | <10 <sup>6</sup>       | <10 <sup>6</sup>     | <10 <sup>6</sup>       | <10 <sup>6</sup>           | <10 <sup>6</sup>       | <10 <sup>6</sup>                   | <10 <sup>6</sup>       | <10 <sup>6</sup> |
|                                                                                                                                                                                                                                                                                                           | Active In                      | 15,872                                                                                                                                                                                                                                                           | 187 (1.2)                    | <10 <sup>6</sup>       | <10 <sup>6</sup>     | 62 (33.2)              | <10 <sup>6</sup>           | 50 (26.7)              | <10 <sup>6</sup>                   | 90 (48.1)              | 12 (6.4)         |
|                                                                                                                                                                                                                                                                                                           | Active Out                     | 1,052                                                                                                                                                                                                                                                            | 13 (1.2)                     | <10 <sup>6</sup>       | <10 <sup>6</sup>     | <10 <sup>6</sup>       | <10 <sup>6</sup>           | <10 <sup>6</sup>       | <10 <sup>6</sup>                   | <10 <sup>6</sup>       | <10 <sup>6</sup> |
|                                                                                                                                                                                                                                                                                                           | Convicted Sentence             | 2,125                                                                                                                                                                                                                                                            | 22 (1.0)                     | <10 <sup>6</sup>       | <10 <sup>6</sup>     | <10 <sup>6</sup>       | <10 <sup>6</sup>           | <10 <sup>6</sup>       | <10 <sup>6</sup>                   | <10 <sup>6</sup>       | <10 <sup>6</sup> |
|                                                                                                                                                                                                                                                                                                           | Downgrade in security category | <10 <sup>6</sup>                                                                                                                                                                                                                                                 | <10 <sup>6</sup>             | <10 <sup>6</sup>       | <10 <sup>6</sup>     | <10 <sup>6</sup>       | <10 <sup>6</sup>           | <10 <sup>6</sup>       | <10 <sup>6</sup>                   | <10 <sup>6</sup>       | <10 <sup>6</sup> |
|                                                                                                                                                                                                                                                                                                           | Internal Cell Move             | <10 <sup>6</sup>                                                                                                                                                                                                                                                 | <10 <sup>6</sup>             | <10 <sup>6</sup>       | <10 <sup>6</sup>     | <10 <sup>6</sup>       | <10 <sup>6</sup>           | <10 <sup>6</sup>       | <10 <sup>6</sup>                   | <10 <sup>6</sup>       | <10 <sup>6</sup> |
|                                                                                                                                                                                                                                                                                                           | Judges Remand                  | 92                                                                                                                                                                                                                                                               | <10 <sup>6</sup>             | <10 <sup>6</sup>       | <10 <sup>6</sup>     | <10 <sup>6</sup>       | <10 <sup>6</sup>           | <10 <sup>6</sup>       | <10 <sup>6</sup>                   | <10 <sup>6</sup>       | <10 <sup>6</sup> |
|                                                                                                                                                                                                                                                                                                           | Licence Revoke                 | 52                                                                                                                                                                                                                                                               | <10 <sup>6</sup>             | <10 <sup>6</sup>       | <10 <sup>6</sup>     | <10 <sup>6</sup>       | <10 <sup>6</sup>           | <10 <sup>6</sup>       | <10 <sup>6</sup>                   | <10 <sup>6</sup>       | <10 <sup>6</sup> |
|                                                                                                                                                                                                                                                                                                           | On Remand                      | 1,492                                                                                                                                                                                                                                                            | 15 (1.0)                     | <10 <sup>6</sup>       | <10 <sup>6</sup>     | <10 <sup>6</sup>       | <10 <sup>6</sup>           | <10 <sup>6</sup>       | <10 <sup>6</sup>                   | <10 <sup>6</sup>       | <10 <sup>6</sup> |
|                                                                                                                                                                                                                                                                                                           | Transfer                       | 910                                                                                                                                                                                                                                                              | <10 <sup>6</sup>             | <10 <sup>6</sup>       | <10 <sup>6</sup>     | <10 <sup>6</sup>       | <10 <sup>6</sup>           | <10 <sup>6</sup>       | <10 <sup>6</sup>                   | <10 <sup>6</sup>       | <10 <sup>6</sup> |
|                                                                                                                                                                                                                                                                                                           | Upgrade in security category   | <10 <sup>6</sup>                                                                                                                                                                                                                                                 | <10 <sup>6</sup>             | <10 <sup>6</sup>       | <10 <sup>6</sup>     | <10 <sup>6</sup>       | <10 <sup>6</sup>           | <10 <sup>6</sup>       | <10 <sup>6</sup>                   | <10 <sup>6</sup>       | <10 <sup>6</sup> |
| 2018/19                                                                                                                                                                                                                                                                                                   | .                              | 88                                                                                                                                                                                                                                                               | <10 <sup>6</sup>             | <10 <sup>6</sup>       | <10 <sup>6</sup>     | <10 <sup>6</sup>       | <10 <sup>6</sup>           | <10 <sup>6</sup>       | <10 <sup>6</sup>                   | <10 <sup>6</sup>       | <10 <sup>6</sup> |
|                                                                                                                                                                                                                                                                                                           | Absconded                      | <10 <sup>6</sup>                                                                                                                                                                                                                                                 | <10 <sup>6</sup>             | <10 <sup>6</sup>       | <10 <sup>6</sup>     | <10 <sup>6</sup>       | <10 <sup>6</sup>           | <10 <sup>6</sup>       | <10 <sup>6</sup>                   | <10 <sup>6</sup>       | <10 <sup>6</sup> |
|                                                                                                                                                                                                                                                                                                           | Active In                      | 18,145                                                                                                                                                                                                                                                           | 266 (1.5)                    | <10 <sup>6</sup>       | <10 <sup>6</sup>     | 26 (9.8)               | 10 (3.8)                   | 25 (9.4)               | 12 (4.5)                           | 39 (14.7)              | 20 (7.5)         |
|                                                                                                                                                                                                                                                                                                           | Active Out                     | 835                                                                                                                                                                                                                                                              | 12 (1.4)                     | <10 <sup>6</sup>       | <10 <sup>6</sup>     | <10 <sup>6</sup>       | <10 <sup>6</sup>           | <10 <sup>6</sup>       | <10 <sup>6</sup>                   | <10 <sup>6</sup>       | <10 <sup>6</sup> |
|                                                                                                                                                                                                                                                                                                           | Convicted Sentence             | 1,320                                                                                                                                                                                                                                                            | 24 (1.8)                     | <10 <sup>6</sup>       | <10 <sup>6</sup>     | <10 <sup>6</sup>       | <10 <sup>6</sup>           | <10 <sup>6</sup>       | <10 <sup>6</sup>                   | <10 <sup>6</sup>       | <10 <sup>6</sup> |
|                                                                                                                                                                                                                                                                                                           | Downgrade in security category | <10 <sup>6</sup>                                                                                                                                                                                                                                                 | <10 <sup>6</sup>             | <10 <sup>6</sup>       | <10 <sup>6</sup>     | <10 <sup>6</sup>       | <10 <sup>6</sup>           | <10 <sup>6</sup>       | <10 <sup>6</sup>                   | <10 <sup>6</sup>       | <10 <sup>6</sup> |
|                                                                                                                                                                                                                                                                                                           | Internal Cell Move             | <10 <sup>6</sup>                                                                                                                                                                                                                                                 | <10 <sup>6</sup>             | <10 <sup>6</sup>       | <10 <sup>6</sup>     | <10 <sup>6</sup>       | <10 <sup>6</sup>           | <10 <sup>6</sup>       | <10 <sup>6</sup>                   | <10 <sup>6</sup>       | <10 <sup>6</sup> |
|                                                                                                                                                                                                                                                                                                           | Judges Remand                  | <10 <sup>6</sup>                                                                                                                                                                                                                                                 | <10 <sup>6</sup>             | <10 <sup>6</sup>       | <10 <sup>6</sup>     | <10 <sup>6</sup>       | <10 <sup>6</sup>           | <10 <sup>6</sup>       | <10 <sup>6</sup>                   | <10 <sup>6</sup>       | <10 <sup>6</sup> |
|                                                                                                                                                                                                                                                                                                           | Licence Revoke                 | 125                                                                                                                                                                                                                                                              | <10 <sup>6</sup>             | <10 <sup>6</sup>       | <10 <sup>6</sup>     | <10 <sup>6</sup>       | <10 <sup>6</sup>           | <10 <sup>6</sup>       | <10 <sup>6</sup>                   | <10 <sup>6</sup>       | <10 <sup>6</sup> |
|                                                                                                                                                                                                                                                                                                           | On Remand                      | 1,059                                                                                                                                                                                                                                                            | 23 (2.2)                     | <10 <sup>6</sup>       | <10 <sup>6</sup>     | <10 <sup>6</sup>       | <10 <sup>6</sup>           | <10 <sup>6</sup>       | <10 <sup>6</sup>                   | <10 <sup>6</sup>       | <10 <sup>6</sup> |
|                                                                                                                                                                                                                                                                                                           | Transfer                       | 518                                                                                                                                                                                                                                                              | <10 <sup>6</sup>             | <10 <sup>6</sup>       | <10 <sup>6</sup>     | <10 <sup>6</sup>       | <10 <sup>6</sup>           | <10 <sup>6</sup>       | <10 <sup>6</sup>                   | <10 <sup>6</sup>       | <10 <sup>6</sup> |
|                                                                                                                                                                                                                                                                                                           | Upgrade in security category   | <10 <sup>6</sup>                                                                                                                                                                                                                                                 | <10 <sup>6</sup>             | <10 <sup>6</sup>       | <10 <sup>6</sup>     | <10 <sup>6</sup>       | <10 <sup>6</sup>           | <10 <sup>6</sup>       | <10 <sup>6</sup>                   | <10 <sup>6</sup>       | <10 <sup>6</sup> |
| 2019/20                                                                                                                                                                                                                                                                                                   | .                              | 69                                                                                                                                                                                                                                                               | <10 <sup>6</sup>             | <10 <sup>6</sup>       | <10 <sup>6</sup>     | <10 <sup>6</sup>       | <10 <sup>6</sup>           | <10 <sup>6</sup>       | <10 <sup>6</sup>                   | <10 <sup>6</sup>       | <10 <sup>6</sup> |
|                                                                                                                                                                                                                                                                                                           | Absconded                      | <10 <sup>6</sup>                                                                                                                                                                                                                                                 | <10 <sup>6</sup>             | <10 <sup>6</sup>       | <10 <sup>6</sup>     | <10 <sup>6</sup>       | <10 <sup>6</sup>           | <10 <sup>6</sup>       | <10 <sup>6</sup>                   | <10 <sup>6</sup>       | <10 <sup>6</sup> |
|                                                                                                                                                                                                                                                                                                           | Active In                      | 22,424                                                                                                                                                                                                                                                           | 411 (1.8)                    | <10 <sup>6</sup>       | <10 <sup>6</sup>     | 25 (6.1)               | <10 <sup>6</sup>           | 21 (5.1)               | <10 <sup>6</sup>                   | 31 (7.5)               | <10 <sup>6</sup> |
|                                                                                                                                                                                                                                                                                                           | Active Out                     | 625                                                                                                                                                                                                                                                              | 10 (1.6)                     | <10 <sup>6</sup>       | <10 <sup>6</sup>     | <10 <sup>6</sup>       | <10 <sup>6</sup>           | <10 <sup>6</sup>       | <10 <sup>6</sup>                   | <10 <sup>6</sup>       | <10 <sup>6</sup> |
|                                                                                                                                                                                                                                                                                                           | Convicted Sentence             | 1,361                                                                                                                                                                                                                                                            | 13 (1.0)                     | <10 <sup>6</sup>       | <10 <sup>6</sup>     | <10 <sup>6</sup>       | <10 <sup>6</sup>           | <10 <sup>6</sup>       | <10 <sup>6</sup>                   | <10 <sup>6</sup>       | <10 <sup>6</sup> |
|                                                                                                                                                                                                                                                                                                           | Downgrade in security category | <10 <sup>6</sup>                                                                                                                                                                                                                                                 | <10 <sup>6</sup>             | <10 <sup>6</sup>       | <10 <sup>6</sup>     | <10 <sup>6</sup>       | <10 <sup>6</sup>           | <10 <sup>6</sup>       | <10 <sup>6</sup>                   | <10 <sup>6</sup>       | <10 <sup>6</sup> |
|                                                                                                                                                                                                                                                                                                           | Internal Cell Move             | <10 <sup>6</sup>                                                                                                                                                                                                                                                 | <10 <sup>6</sup>             | <10 <sup>6</sup>       | <10 <sup>6</sup>     | <10 <sup>6</sup>       | <10 <sup>6</sup>           | <10 <sup>6</sup>       | <10 <sup>6</sup>                   | <10 <sup>6</sup>       | <10 <sup>6</sup> |
|                                                                                                                                                                                                                                                                                                           | Judges Remand                  | 19                                                                                                                                                                                                                                                               | <10 <sup>6</sup>             | <10 <sup>6</sup>       | <10 <sup>6</sup>     | <10 <sup>6</sup>       | <10 <sup>6</sup>           | <10 <sup>6</sup>       | <10 <sup>6</sup>                   | <10 <sup>6</sup>       | <10 <sup>6</sup> |
|                                                                                                                                                                                                                                                                                                           | Licence Revoke                 | 178                                                                                                                                                                                                                                                              | <10 <sup>6</sup>             | <10 <sup>6</sup>       | <10 <sup>6</sup>     | <10 <sup>6</sup>       | <10 <sup>6</sup>           | <10 <sup>6</sup>       | <10 <sup>6</sup>                   | <10 <sup>6</sup>       | <10 <sup>6</sup> |
|                                                                                                                                                                                                                                                                                                           | On Remand                      | 1,031                                                                                                                                                                                                                                                            | 23 (2.2)                     | <10 <sup>6</sup>       | <10 <sup>6</sup>     | <10 <sup>6</sup>       | <10 <sup>6</sup>           | <10 <sup>6</sup>       | <10 <sup>6</sup>                   | <10 <sup>6</sup>       | <10 <sup>6</sup> |
|                                                                                                                                                                                                                                                                                                           | Transfer                       | 101                                                                                                                                                                                                                                                              | <10 <sup>6</sup>             | <10 <sup>6</sup>       | <10 <sup>6</sup>     | <10 <sup>6</sup>       | <10 <sup>6</sup>           | <10 <sup>6</sup>       | <10 <sup>6</sup>                   | <10 <sup>6</sup>       | <10 <sup>6</sup> |
|                                                                                                                                                                                                                                                                                                           | Upgrade in security category   | <10 <sup>6</sup>                                                                                                                                                                                                                                                 | <10 <sup>6</sup>             | <10 <sup>6</sup>       | <10 <sup>6</sup>     | <10 <sup>6</sup>       | <10 <sup>6</sup>           | <10 <sup>6</sup>       | <10 <sup>6</sup>                   | <10 <sup>6</sup>       | <10 <sup>6</sup> |
| <b>Age - years</b>                                                                                                                                                                                                                                                                                        |                                |                                                                                                                                                                                                                                                                  |                              |                        |                      |                        |                            |                        |                                    |                        |                  |
| 2017/18                                                                                                                                                                                                                                                                                                   | 10 - <20                       | 468                                                                                                                                                                                                                                                              | <10 <sup>6</sup>             | <10 <sup>6</sup>       | <10 <sup>6</sup>     | <10 <sup>6</sup>       | <10 <sup>6</sup>           | <10 <sup>6</sup>       | <10 <sup>6</sup>                   | <10 <sup>6</sup>       | <10 <sup>6</sup> |
|                                                                                                                                                                                                                                                                                                           | 20 - <30                       | 6,994                                                                                                                                                                                                                                                            | 37 (0.5)                     | <10 <sup>6</sup>       | <10 <sup>6</sup>     | <10 <sup>6</sup>       | <10 <sup>6</sup>           | <10 <sup>6</sup>       | <10 <sup>6</sup>                   | 14 (37.8)              | <10 <sup>6</sup> |
|                                                                                                                                                                                                                                                                                                           | 30 - <40                       | 7,051                                                                                                                                                                                                                                                            | 94 (1.3)                     | <10 <sup>6</sup>       | <10 <sup>6</sup>     | 27 (28.7)              | <10 <sup>6</sup>           | 21 (22.3)              | <10 <sup>6</sup>                   | 42 (44.7)              | <10 <sup>6</sup> |
|                                                                                                                                                                                                                                                                                                           | 40 - <50                       | 4,114                                                                                                                                                                                                                                                            | 60 (1.5)                     | <10 <sup>6</sup>       | <10 <sup>6</sup>     | 19 (31.7)              | <10 <sup>6</sup>           | 16 (26.7)              | <10 <sup>6</sup>                   | 26 (43.3)              | <10 <sup>6</sup> |
|                                                                                                                                                                                                                                                                                                           | 50 - <60                       | 2,107                                                                                                                                                                                                                                                            | 35 (1.7)                     | <10 <sup>6</sup>       | <10 <sup>6</sup>     | 15 (42.9)              | <10 <sup>6</sup>           | 13 (37.1)              | <10 <sup>6</sup>                   | 19 (54.3)              | <10 <sup>6</sup> |
|                                                                                                                                                                                                                                                                                                           | 60 - <70                       | 684                                                                                                                                                                                                                                                              | <10 <sup>6</sup>             | <10 <sup>6</sup>       | <10 <sup>6</sup>     | <10 <sup>6</sup>       | <10 <sup>6</sup>           | <10 <sup>6</sup>       | <10 <sup>6</sup>                   | <10 <sup>6</sup>       | <10 <sup>6</sup> |
|                                                                                                                                                                                                                                                                                                           | 70 - <80                       | 213                                                                                                                                                                                                                                                              | <10 <sup>6</sup>             | <10 <sup>6</sup>       | <10 <sup>6</sup>     | <10 <sup>6</sup>       | <10 <sup>6</sup>           | <10 <sup>6</sup>       | <10 <sup>6</sup>                   | <10 <sup>6</sup>       | <10 <sup>6</sup> |
|                                                                                                                                                                                                                                                                                                           | 80 - <90                       | 40                                                                                                                                                                                                                                                               | <10 <sup>6</sup>             | <10 <sup>6</sup>       | <10 <sup>6</sup>     | <10 <sup>6</sup>       | <10 <sup>6</sup>           | <10 <sup>6</sup>       | <10 <sup>6</sup>                   | <10 <sup>6</sup>       | <10 <sup>6</sup> |
|                                                                                                                                                                                                                                                                                                           | 90 - <100                      | <10 <sup>6</sup>                                                                                                                                                                                                                                                 | <10 <sup>6</sup>             | <10 <sup>6</sup>       | <10 <sup>6</sup>     | <10 <sup>6</sup>       | <10 <sup>6</sup>           | <10 <sup>6</sup>       | <10 <sup>6</sup>                   | <10 <sup>6</sup>       | <10 <sup>6</sup> |
|                                                                                                                                                                                                                                                                                                           | 100 - <110                     | <10 <sup>6</sup>                                                                                                                                                                                                                                                 | <10 <sup>6</sup>             | <10 <sup>6</sup>       | <10 <sup>6</sup>     | <10 <sup>6</sup>       | <10 <sup>6</sup>           | <10 <sup>6</sup>       | <10 <sup>6</sup>                   | <10 <sup>6</sup>       | <10 <sup>6</sup> |

<sup>1</sup>Eligible for indicator; <sup>2</sup>Achieve in current prison; <sup>3</sup>Achieve in previous prison; <sup>4</sup>Overall achievement - either current or previous prison; <sup>5</sup>Declined indicator; <sup>6</sup>Suppressed (<10) to avoid disclosure

| The proportion of people who have received three or more prescriptions for an antipsychotic in the preceding 12 months, and who have a record of blood testing (fasting glucose, HbA1c, lipid profile, urea and electrolytes, full blood count, liver function tests), body mass index and blood pressure |                                |                               |                      |                        |                             |                        |                      |                        |                             |                      |                        |                  |
|-----------------------------------------------------------------------------------------------------------------------------------------------------------------------------------------------------------------------------------------------------------------------------------------------------------|--------------------------------|-------------------------------|----------------------|------------------------|-----------------------------|------------------------|----------------------|------------------------|-----------------------------|----------------------|------------------------|------------------|
| Community achievement 2019/20: No direct comparison in QOF - just percentage of patients with MH diagnosis of schizophrenia, bipolar affective disorder and other psychoses who have record of BP and BMI in the last 12 months (80.28% and 74.40% respectively)                                          |                                |                               |                      |                        |                             |                        |                      |                        |                             |                      |                        |                  |
| Group: Mental health                                                                                                                                                                                                                                                                                      |                                |                               |                      |                        |                             |                        |                      |                        |                             |                      |                        |                  |
| Indicator                                                                                                                                                                                                                                                                                                 | Variable                       | Full blood count (% eligible) |                      |                        | Liver function (% eligible) |                        | BMI (% eligible)     |                        | Blood Pressure (% eligible) |                      |                        |                  |
|                                                                                                                                                                                                                                                                                                           |                                | Eligible                      | Satisfy <sup>2</sup> | Elsewhere <sup>3</sup> | Satisfy <sup>2</sup>        | Elsewhere <sup>3</sup> | Satisfy <sup>2</sup> | Elsewhere <sup>3</sup> | Declined <sup>5</sup>       | Satisfy <sup>2</sup> | Elsewhere <sup>3</sup> |                  |
| Gender                                                                                                                                                                                                                                                                                                    | 2017/18                        |                               |                      |                        |                             |                        |                      |                        |                             |                      |                        |                  |
|                                                                                                                                                                                                                                                                                                           | F                              | 42                            | 26 (61.9)            | <10 <sup>6</sup>       | 25 (59.5)                   | <10 <sup>6</sup>       | 34 (81.0)            | <10 <sup>6</sup>       | <10 <sup>6</sup>            | 40 (95.2)            | <10 <sup>6</sup>       |                  |
|                                                                                                                                                                                                                                                                                                           | M                              | 202                           | 90 (44.6)            | 10 (5.0)               | 82 (40.6)                   | <10 <sup>6</sup>       | 145 (71.8)           | <10 <sup>6</sup>       | <10 <sup>6</sup>            | 163 (80.7)           | <10 <sup>6</sup>       |                  |
|                                                                                                                                                                                                                                                                                                           | 2018/19                        | F                             | 75                   | 12 (16.0)              | <10 <sup>6</sup>            | 12 (16.0)              | <10 <sup>6</sup>     | 19 (25.3)              | <10 <sup>6</sup>            | 20 (26.7)            | <10 <sup>6</sup>       |                  |
|                                                                                                                                                                                                                                                                                                           | M                              | 251                           | 37 (14.7)            | 20 (8.0)               | 28 (11.2)                   | 12 (4.8)               | 76 (30.3)            | 16 (6.4)               | <10 <sup>6</sup>            | 81 (32.3)            | 15 (6.0)               |                  |
|                                                                                                                                                                                                                                                                                                           | 2019/20                        | F                             | 38                   | <10 <sup>6</sup>       | <10 <sup>6</sup>            | <10 <sup>6</sup>       | <10 <sup>6</sup>     | <10 <sup>6</sup>       | <10 <sup>6</sup>            | <10 <sup>6</sup>     | <10 <sup>6</sup>       |                  |
| M                                                                                                                                                                                                                                                                                                         | 350                            | 30 (8.6)                      | 6 (1.7)              | 16 (4.6)               | <10 <sup>6</sup>            | 19 (5.4)               | 10 (2.9)             | <10 <sup>6</sup>       | 49 (14.0)                   | <10 <sup>6</sup>     |                        |                  |
| Sentence Status                                                                                                                                                                                                                                                                                           |                                |                               |                      |                        |                             |                        |                      |                        |                             |                      |                        |                  |
| 2017/18                                                                                                                                                                                                                                                                                                   | .                              | <10 <sup>9</sup>              | <10 <sup>6</sup>     | <10 <sup>6</sup>       | <10 <sup>6</sup>            | <10 <sup>6</sup>       | <10 <sup>6</sup>     | <10 <sup>6</sup>       | <10 <sup>6</sup>            | <10 <sup>6</sup>     | <10 <sup>6</sup>       |                  |
|                                                                                                                                                                                                                                                                                                           | Absconded                      | <10 <sup>9</sup>              | <10 <sup>6</sup>     | <10 <sup>6</sup>       | <10 <sup>6</sup>            | <10 <sup>6</sup>       | <10 <sup>6</sup>     | <10 <sup>6</sup>       | <10 <sup>6</sup>            | <10 <sup>6</sup>     | <10 <sup>6</sup>       |                  |
|                                                                                                                                                                                                                                                                                                           | Active In                      | 187                           | 95 (50.8)            | 11 (5.9)               | 88 (47.1)                   | <10 <sup>6</sup>       | 139 (74.3)           | <10 <sup>6</sup>       | <10 <sup>6</sup>            | 157 (84.0)           | <10 <sup>6</sup>       |                  |
|                                                                                                                                                                                                                                                                                                           | Active Out                     | 13                            | <10 <sup>6</sup>     | <10 <sup>6</sup>       | <10 <sup>6</sup>            | <10 <sup>6</sup>       | <10 <sup>6</sup>     | <10 <sup>6</sup>       | <10 <sup>6</sup>            | <10 <sup>6</sup>     | <10 <sup>6</sup>       |                  |
|                                                                                                                                                                                                                                                                                                           | Convicted Sentence             | 22                            | <10 <sup>6</sup>     | <10 <sup>6</sup>       | <10 <sup>6</sup>            | <10 <sup>6</sup>       | 17 (77.3)            | <10 <sup>6</sup>       | <10 <sup>6</sup>            | 20 (90.9)            | <10 <sup>6</sup>       |                  |
|                                                                                                                                                                                                                                                                                                           | Downgrade in security category | <10 <sup>9</sup>              | <10 <sup>6</sup>     | <10 <sup>6</sup>       | <10 <sup>6</sup>            | <10 <sup>6</sup>       | <10 <sup>6</sup>     | <10 <sup>6</sup>       | <10 <sup>6</sup>            | <10 <sup>6</sup>     | <10 <sup>6</sup>       |                  |
|                                                                                                                                                                                                                                                                                                           | Internal Cell Move             | <10 <sup>9</sup>              | <10 <sup>6</sup>     | <10 <sup>6</sup>       | <10 <sup>6</sup>            | <10 <sup>6</sup>       | <10 <sup>6</sup>     | <10 <sup>6</sup>       | <10 <sup>6</sup>            | <10 <sup>6</sup>     | <10 <sup>6</sup>       |                  |
|                                                                                                                                                                                                                                                                                                           | Judges Remand                  | <10 <sup>9</sup>              | <10 <sup>6</sup>     | <10 <sup>6</sup>       | <10 <sup>6</sup>            | <10 <sup>6</sup>       | <10 <sup>6</sup>     | <10 <sup>6</sup>       | <10 <sup>6</sup>            | <10 <sup>6</sup>     | <10 <sup>6</sup>       |                  |
|                                                                                                                                                                                                                                                                                                           | Licence Revoke                 | <10 <sup>9</sup>              | <10 <sup>6</sup>     | <10 <sup>6</sup>       | <10 <sup>6</sup>            | <10 <sup>6</sup>       | <10 <sup>6</sup>     | <10 <sup>6</sup>       | <10 <sup>6</sup>            | <10 <sup>6</sup>     | <10 <sup>6</sup>       |                  |
|                                                                                                                                                                                                                                                                                                           | On Remand                      | 15                            | <10 <sup>6</sup>     | <10 <sup>6</sup>       | <10 <sup>6</sup>            | <10 <sup>6</sup>       | 12 (80.0)            | <10 <sup>6</sup>       | <10 <sup>6</sup>            | 12 (80.0)            | <10 <sup>6</sup>       |                  |
|                                                                                                                                                                                                                                                                                                           | Transfer                       | <10 <sup>9</sup>              | <10 <sup>6</sup>     | <10 <sup>6</sup>       | <10 <sup>6</sup>            | <10 <sup>6</sup>       | <10 <sup>6</sup>     | <10 <sup>6</sup>       | <10 <sup>6</sup>            | <10 <sup>6</sup>     | <10 <sup>6</sup>       |                  |
|                                                                                                                                                                                                                                                                                                           | Upgrade in security category   | <10 <sup>9</sup>              | <10 <sup>6</sup>     | <10 <sup>6</sup>       | <10 <sup>6</sup>            | <10 <sup>6</sup>       | <10 <sup>6</sup>     | <10 <sup>6</sup>       | <10 <sup>6</sup>            | <10 <sup>6</sup>     | <10 <sup>6</sup>       |                  |
|                                                                                                                                                                                                                                                                                                           | 2018/19                        | .                             | <10 <sup>9</sup>     | <10 <sup>6</sup>       | <10 <sup>6</sup>            | <10 <sup>6</sup>       | <10 <sup>6</sup>     | <10 <sup>6</sup>       | <10 <sup>6</sup>            | <10 <sup>6</sup>     | <10 <sup>6</sup>       | <10 <sup>6</sup> |
|                                                                                                                                                                                                                                                                                                           |                                | Absconded                     | <10 <sup>9</sup>     | <10 <sup>6</sup>       | <10 <sup>6</sup>            | <10 <sup>6</sup>       | <10 <sup>6</sup>     | <10 <sup>6</sup>       | <10 <sup>6</sup>            | <10 <sup>6</sup>     | <10 <sup>6</sup>       | <10 <sup>6</sup> |
|                                                                                                                                                                                                                                                                                                           |                                | Active In                     | 266                  | 42 (15.8)              | 21 (7.9)                    | 34 (12.8)              | 13 (4.9)             | 84 (31.6)              | 16 (6.0)                    | <10 <sup>6</sup>     | 88 (33.1)              | 16 (6.0)         |
|                                                                                                                                                                                                                                                                                                           |                                | Active Out                    | 12                   | <10 <sup>6</sup>       | <10 <sup>6</sup>            | <10 <sup>6</sup>       | <10 <sup>6</sup>     | <10 <sup>6</sup>       | <10 <sup>6</sup>            | <10 <sup>6</sup>     | <10 <sup>6</sup>       | <10 <sup>6</sup> |
|                                                                                                                                                                                                                                                                                                           |                                | Convicted Sentence            | 24                   | <10 <sup>6</sup>       | <10 <sup>6</sup>            | <10 <sup>6</sup>       | <10 <sup>6</sup>     | <10 <sup>6</sup>       | <10 <sup>6</sup>            | <10 <sup>6</sup>     | <10 <sup>6</sup>       | <10 <sup>6</sup> |
| Downgrade in security category                                                                                                                                                                                                                                                                            |                                | <10 <sup>9</sup>              | <10 <sup>6</sup>     | <10 <sup>6</sup>       | <10 <sup>6</sup>            | <10 <sup>6</sup>       | <10 <sup>6</sup>     | <10 <sup>6</sup>       | <10 <sup>6</sup>            | <10 <sup>6</sup>     | <10 <sup>6</sup>       |                  |
| Internal Cell Move                                                                                                                                                                                                                                                                                        |                                | <10 <sup>9</sup>              | <10 <sup>6</sup>     | <10 <sup>6</sup>       | <10 <sup>6</sup>            | <10 <sup>6</sup>       | <10 <sup>6</sup>     | <10 <sup>6</sup>       | <10 <sup>6</sup>            | <10 <sup>6</sup>     | <10 <sup>6</sup>       |                  |
| Judges Remand                                                                                                                                                                                                                                                                                             |                                | <10 <sup>9</sup>              | <10 <sup>6</sup>     | <10 <sup>6</sup>       | <10 <sup>6</sup>            | <10 <sup>6</sup>       | <10 <sup>6</sup>     | <10 <sup>6</sup>       | <10 <sup>6</sup>            | <10 <sup>6</sup>     | <10 <sup>6</sup>       |                  |
| Licence Revoke                                                                                                                                                                                                                                                                                            |                                | <10 <sup>9</sup>              | <10 <sup>6</sup>     | <10 <sup>6</sup>       | <10 <sup>6</sup>            | <10 <sup>6</sup>       | <10 <sup>6</sup>     | <10 <sup>6</sup>       | <10 <sup>6</sup>            | <10 <sup>6</sup>     | <10 <sup>6</sup>       |                  |
| On Remand                                                                                                                                                                                                                                                                                                 |                                | 23                            | <10 <sup>6</sup>     | <10 <sup>6</sup>       | <10 <sup>6</sup>            | <10 <sup>6</sup>       | <10 <sup>6</sup>     | <10 <sup>6</sup>       | <10 <sup>6</sup>            | <10 <sup>6</sup>     | <10 <sup>6</sup>       |                  |
| Transfer                                                                                                                                                                                                                                                                                                  |                                | <10 <sup>9</sup>              | <10 <sup>6</sup>     | <10 <sup>6</sup>       | <10 <sup>6</sup>            | <10 <sup>6</sup>       | <10 <sup>6</sup>     | <10 <sup>6</sup>       | <10 <sup>6</sup>            | <10 <sup>6</sup>     | <10 <sup>6</sup>       |                  |
| Upgrade in security category                                                                                                                                                                                                                                                                              |                                | <10 <sup>9</sup>              | <10 <sup>6</sup>     | <10 <sup>6</sup>       | <10 <sup>6</sup>            | <10 <sup>6</sup>       | <10 <sup>6</sup>     | <10 <sup>6</sup>       | <10 <sup>6</sup>            | <10 <sup>6</sup>     | <10 <sup>6</sup>       |                  |
| 2019/20                                                                                                                                                                                                                                                                                                   |                                | .                             | <10 <sup>9</sup>     | <10 <sup>6</sup>       | <10 <sup>6</sup>            | <10 <sup>6</sup>       | <10 <sup>6</sup>     | <10 <sup>6</sup>       | <10 <sup>6</sup>            | <10 <sup>6</sup>     | <10 <sup>6</sup>       | <10 <sup>6</sup> |
|                                                                                                                                                                                                                                                                                                           |                                | Absconded                     | <10 <sup>9</sup>     | <10 <sup>6</sup>       | <10 <sup>6</sup>            | <10 <sup>6</sup>       | <10 <sup>6</sup>     | <10 <sup>6</sup>       | <10 <sup>6</sup>            | <10 <sup>6</sup>     | <10 <sup>6</sup>       | <10 <sup>6</sup> |
|                                                                                                                                                                                                                                                                                                           |                                | Active In                     | 411                  | 32 (7.8)               | <10 <sup>6</sup>            | 15 (3.6)               | <10 <sup>6</sup>     | 20 (4.9)               | 11 (2.7)                    | <10 <sup>6</sup>     | 54 (13.1)              | <10 <sup>6</sup> |
|                                                                                                                                                                                                                                                                                                           |                                | Active Out                    | 10                   | <10 <sup>6</sup>       | <10 <sup>6</sup>            | <10 <sup>6</sup>       | <10 <sup>6</sup>     | <10 <sup>6</sup>       | <10 <sup>6</sup>            | <10 <sup>6</sup>     | <10 <sup>6</sup>       | <10 <sup>6</sup> |
|                                                                                                                                                                                                                                                                                                           |                                | Convicted Sentence            | 13                   | <10 <sup>6</sup>       | <10 <sup>6</sup>            | <10 <sup>6</sup>       | <10 <sup>6</sup>     | <10 <sup>6</sup>       | <10 <sup>6</sup>            | <10 <sup>6</sup>     | <10 <sup>6</sup>       | <10 <sup>6</sup> |
|                                                                                                                                                                                                                                                                                                           | Downgrade in security category | <10 <sup>9</sup>              | <10 <sup>6</sup>     | <10 <sup>6</sup>       | <10 <sup>6</sup>            | <10 <sup>6</sup>       | <10 <sup>6</sup>     | <10 <sup>6</sup>       | <10 <sup>6</sup>            | <10 <sup>6</sup>     | <10 <sup>6</sup>       |                  |
|                                                                                                                                                                                                                                                                                                           | Internal Cell Move             | <10 <sup>9</sup>              | <10 <sup>6</sup>     | <10 <sup>6</sup>       | <10 <sup>6</sup>            | <10 <sup>6</sup>       | <10 <sup>6</sup>     | <10 <sup>6</sup>       | <10 <sup>6</sup>            | <10 <sup>6</sup>     | <10 <sup>6</sup>       |                  |
|                                                                                                                                                                                                                                                                                                           | Judges Remand                  | <10 <sup>9</sup>              | <10 <sup>6</sup>     | <10 <sup>6</sup>       | <10 <sup>6</sup>            | <10 <sup>6</sup>       | <10 <sup>6</sup>     | <10 <sup>6</sup>       | <10 <sup>6</sup>            | <10 <sup>6</sup>     | <10 <sup>6</sup>       |                  |
|                                                                                                                                                                                                                                                                                                           | Licence Revoke                 | <10 <sup>9</sup>              | <10 <sup>6</sup>     | <10 <sup>6</sup>       | <10 <sup>6</sup>            | <10 <sup>6</sup>       | <10 <sup>6</sup>     | <10 <sup>6</sup>       | <10 <sup>6</sup>            | <10 <sup>6</sup>     | <10 <sup>6</sup>       |                  |
|                                                                                                                                                                                                                                                                                                           | On Remand                      | 23                            | <10 <sup>6</sup>     | <10 <sup>6</sup>       | <10 <sup>6</sup>            | <10 <sup>6</sup>       | <10 <sup>6</sup>     | <10 <sup>6</sup>       | <10 <sup>6</sup>            | <10 <sup>6</sup>     | <10 <sup>6</sup>       |                  |
|                                                                                                                                                                                                                                                                                                           | Transfer                       | <10 <sup>9</sup>              | <10 <sup>6</sup>     | <10 <sup>6</sup>       | <10 <sup>6</sup>            | <10 <sup>6</sup>       | <10 <sup>6</sup>     | <10 <sup>6</sup>       | <10 <sup>6</sup>            | <10 <sup>6</sup>     | <10 <sup>6</sup>       |                  |
|                                                                                                                                                                                                                                                                                                           | Upgrade in security category   | <10 <sup>9</sup>              | <10 <sup>6</sup>     | <10 <sup>6</sup>       | <10 <sup>6</sup>            | <10 <sup>6</sup>       | <10 <sup>6</sup>     | <10 <sup>6</sup>       | <10 <sup>6</sup>            | <10 <sup>6</sup>     | <10 <sup>6</sup>       |                  |
|                                                                                                                                                                                                                                                                                                           | Age - years                    |                               |                      |                        |                             |                        |                      |                        |                             |                      |                        |                  |
|                                                                                                                                                                                                                                                                                                           | 2017/18                        | 10 - <20                      | <10 <sup>9</sup>     | <10 <sup>6</sup>       | <10 <sup>6</sup>            | <10 <sup>6</sup>       | <10 <sup>6</sup>     | <10 <sup>6</sup>       | <10 <sup>6</sup>            | <10 <sup>6</sup>     | <10 <sup>6</sup>       | <10 <sup>6</sup> |
|                                                                                                                                                                                                                                                                                                           |                                | 20 - <30                      | 37                   | 14 (37.8)              | <10 <sup>6</sup>            | 15 (40.5)              | <10 <sup>6</sup>     | 31 (83.8)              | <10 <sup>6</sup>            | <10 <sup>6</sup>     | 32 (86.5)              | <10 <sup>6</sup> |
|                                                                                                                                                                                                                                                                                                           |                                | 30 - <40                      | 94                   | 43 (45.7)              | <10 <sup>6</sup>            | 40 (42.6)              | <10 <sup>6</sup>     | 65 (69.1)              | <10 <sup>6</sup>            | <10 <sup>6</sup>     | 74 (78.7)              | <10 <sup>6</sup> |
|                                                                                                                                                                                                                                                                                                           |                                | 40 - <50                      | 60                   | 28 (46.7)              | <10 <sup>6</sup>            | 24 (40.0)              | <10 <sup>6</sup>     | 45 (75.0)              | <10 <sup>6</sup>            | <10 <sup>6</sup>     | 52 (86.7)              | <10 <sup>6</sup> |
| 50 - <60                                                                                                                                                                                                                                                                                                  |                                | 35                            | 21 (60.0)            | <10 <sup>6</sup>       | 18 (51.4)                   | <10 <sup>6</sup>       | 26 (74.3)            | <10 <sup>6</sup>       | <10 <sup>6</sup>            | 29 (82.9)            | <10 <sup>6</sup>       |                  |
| 60 - <70                                                                                                                                                                                                                                                                                                  |                                | <10 <sup>9</sup>              | <10 <sup>6</sup>     | <10 <sup>6</sup>       | <10 <sup>6</sup>            | <10 <sup>6</sup>       | <10 <sup>6</sup>     | <10 <sup>6</sup>       | <10 <sup>6</sup>            | <10 <sup>6</sup>     | <10 <sup>6</sup>       |                  |
| 70 - <80                                                                                                                                                                                                                                                                                                  |                                | <10 <sup>9</sup>              | <10 <sup>6</sup>     | <10 <sup>6</sup>       | <10 <sup>6</sup>            | <10 <sup>6</sup>       | <10 <sup>6</sup>     | <10 <sup>6</sup>       | <10 <sup>6</sup>            | <10 <sup>6</sup>     | <10 <sup>6</sup>       |                  |
| 80 - <90                                                                                                                                                                                                                                                                                                  |                                | <10 <sup>9</sup>              | <10 <sup>6</sup>     | <10 <sup>6</sup>       | <10 <sup>6</sup>            | <10 <sup>6</sup>       | <10 <sup>6</sup>     | <10 <sup>6</sup>       | <10 <sup>6</sup>            | <10 <sup>6</sup>     | <10 <sup>6</sup>       |                  |
| 90 - <100                                                                                                                                                                                                                                                                                                 |                                | <10 <sup>9</sup>              | <10 <sup>6</sup>     | <10 <sup>6</sup>       | <10 <sup>6</sup>            | <10 <sup>6</sup>       | <10 <sup>6</sup>     | <10 <sup>6</sup>       | <10 <sup>6</sup>            | <10 <sup>6</sup>     | <10 <sup>6</sup>       |                  |
| 100 - <110                                                                                                                                                                                                                                                                                                |                                | <10 <sup>9</sup>              | <10 <sup>6</sup>     | <10 <sup>6</sup>       | <10 <sup>6</sup>            | <10 <sup>6</sup>       | <10 <sup>6</sup>     | <10 <sup>6</sup>       | <10 <sup>6</sup>            | <10 <sup>6</sup>     | <10 <sup>6</sup>       |                  |

<sup>1</sup>Eligible for indicator; <sup>2</sup>Achieve in current prison; <sup>3</sup>Achieve in previous prison; <sup>4</sup>Overall achievement - either current or previous prison; <sup>5</sup>Declined indicator; <sup>6</sup>Suppressed (<10) to avoid disclosure



| Indicator                                                                                                                                                                                                                                                                                                        |                        | Community achievement 2019/20: No direct comparison in QOF - just percentage of patients with MH diagnosis of schizophrenia, bipolar affective disorder and other psychoses who have record of BP and BMI in the last 12 months (80.28% and 74.40% respectively) |                      |                              |                      |                        |                      |                            |                      |                                    |                  |
|------------------------------------------------------------------------------------------------------------------------------------------------------------------------------------------------------------------------------------------------------------------------------------------------------------------|------------------------|------------------------------------------------------------------------------------------------------------------------------------------------------------------------------------------------------------------------------------------------------------------|----------------------|------------------------------|----------------------|------------------------|----------------------|----------------------------|----------------------|------------------------------------|------------------|
| Group: Mental health                                                                                                                                                                                                                                                                                             |                        | Population                                                                                                                                                                                                                                                       |                      | Fasting glucose (% eligible) |                      | HbA1c (% eligible)     |                      | Lipid profile (% eligible) |                      | Urea and electrolytes (% eligible) |                  |
| Variable                                                                                                                                                                                                                                                                                                         | Population             | Eligible (% popln)                                                                                                                                                                                                                                               | Satisfy <sup>2</sup> | Elsewhere <sup>3</sup>       | Satisfy <sup>2</sup> | Elsewhere <sup>3</sup> | Satisfy <sup>2</sup> | Elsewhere <sup>3</sup>     | Satisfy <sup>2</sup> | Elsewhere <sup>3</sup>             |                  |
| <i>The proportion of people who have received three or more prescriptions for an antipsychotic in the preceding 12 months, and who have a record of blood testing (fasting glucose, HbA1c, lipid profile, urea and electrolytes, full blood count, liver function tests), body mass index and blood pressure</i> |                        |                                                                                                                                                                                                                                                                  |                      |                              |                      |                        |                      |                            |                      |                                    |                  |
| 2018/19                                                                                                                                                                                                                                                                                                          | 10 - <20               | 436                                                                                                                                                                                                                                                              | <10 <sup>6</sup>     | <10 <sup>6</sup>             | <10 <sup>6</sup>     | <10 <sup>6</sup>       | <10 <sup>6</sup>     | <10 <sup>6</sup>           | <10 <sup>6</sup>     | <10 <sup>6</sup>                   | <10 <sup>6</sup> |
|                                                                                                                                                                                                                                                                                                                  | 20 - <30               | 7,163                                                                                                                                                                                                                                                            | 68 (0.9)             | <10 <sup>6</sup>             | <10 <sup>6</sup>     | <10 <sup>6</sup>       | <10 <sup>6</sup>     | <10 <sup>6</sup>           | <10 <sup>6</sup>     | <10 <sup>6</sup>                   | <10 <sup>6</sup> |
|                                                                                                                                                                                                                                                                                                                  | 30 - <40               | 7,381                                                                                                                                                                                                                                                            | 124 (1.7)            | <10 <sup>6</sup>             | <10 <sup>6</sup>     | 11 (8.9)               | <10 <sup>6</sup>     | <10 <sup>6</sup>           | <10 <sup>6</sup>     | 14 (11.3)                          | 10 (8.1)         |
|                                                                                                                                                                                                                                                                                                                  | 40 - <50               | 4,180                                                                                                                                                                                                                                                            | 85 (2.0)             | <10 <sup>6</sup>             | <10 <sup>6</sup>     | <10 <sup>6</sup>       | <10 <sup>6</sup>     | <10 <sup>6</sup>           | <10 <sup>6</sup>     | 14 (16.5)                          | <10 <sup>6</sup> |
|                                                                                                                                                                                                                                                                                                                  | 50 - <60               | 1,978                                                                                                                                                                                                                                                            | 31 (1.6)             | <10 <sup>6</sup>             | <10 <sup>6</sup>     | <10 <sup>6</sup>       | <10 <sup>6</sup>     | <10 <sup>6</sup>           | <10 <sup>6</sup>     | <10 <sup>6</sup>                   | <10 <sup>6</sup> |
|                                                                                                                                                                                                                                                                                                                  | 60 - <70               | 701                                                                                                                                                                                                                                                              | <10 <sup>6</sup>     | <10 <sup>6</sup>             | <10 <sup>6</sup>     | <10 <sup>6</sup>       | <10 <sup>6</sup>     | <10 <sup>6</sup>           | <10 <sup>6</sup>     | <10 <sup>6</sup>                   | <10 <sup>6</sup> |
|                                                                                                                                                                                                                                                                                                                  | 70 - <80               | 209                                                                                                                                                                                                                                                              | <10 <sup>6</sup>     | <10 <sup>6</sup>             | <10 <sup>6</sup>     | <10 <sup>6</sup>       | <10 <sup>6</sup>     | <10 <sup>6</sup>           | <10 <sup>6</sup>     | <10 <sup>6</sup>                   | <10 <sup>6</sup> |
|                                                                                                                                                                                                                                                                                                                  | 80 - <90               | 45                                                                                                                                                                                                                                                               | <10 <sup>6</sup>     | <10 <sup>6</sup>             | <10 <sup>6</sup>     | <10 <sup>6</sup>       | <10 <sup>6</sup>     | <10 <sup>6</sup>           | <10 <sup>6</sup>     | <10 <sup>6</sup>                   | <10 <sup>6</sup> |
|                                                                                                                                                                                                                                                                                                                  | 90 - <100              | <10 <sup>9</sup>                                                                                                                                                                                                                                                 | <10 <sup>6</sup>     | <10 <sup>6</sup>             | <10 <sup>6</sup>     | <10 <sup>6</sup>       | <10 <sup>6</sup>     | <10 <sup>6</sup>           | <10 <sup>6</sup>     | <10 <sup>6</sup>                   | <10 <sup>6</sup> |
|                                                                                                                                                                                                                                                                                                                  | 100 - <110             | <10 <sup>9</sup>                                                                                                                                                                                                                                                 | <10 <sup>6</sup>     | <10 <sup>6</sup>             | <10 <sup>6</sup>     | <10 <sup>6</sup>       | <10 <sup>6</sup>     | <10 <sup>6</sup>           | <10 <sup>6</sup>     | <10 <sup>6</sup>                   | <10 <sup>6</sup> |
| 2019/20                                                                                                                                                                                                                                                                                                          | 10 - <20               | 404                                                                                                                                                                                                                                                              | <10 <sup>6</sup>     | <10 <sup>6</sup>             | <10 <sup>6</sup>     | <10 <sup>6</sup>       | <10 <sup>6</sup>     | <10 <sup>6</sup>           | <10 <sup>6</sup>     | <10 <sup>6</sup>                   | <10 <sup>6</sup> |
|                                                                                                                                                                                                                                                                                                                  | 20 - <30               | 8,064                                                                                                                                                                                                                                                            | 92 (1.1)             | <10 <sup>6</sup>             | <10 <sup>6</sup>     | <10 <sup>6</sup>       | <10 <sup>6</sup>     | <10 <sup>6</sup>           | <10 <sup>6</sup>     | <10 <sup>6</sup>                   | <10 <sup>6</sup> |
|                                                                                                                                                                                                                                                                                                                  | 30 - <40               | 9,125                                                                                                                                                                                                                                                            | 188 (2.1)            | <10 <sup>6</sup>             | <10 <sup>6</sup>     | <10 <sup>6</sup>       | <10 <sup>6</sup>     | <10 <sup>6</sup>           | <10 <sup>6</sup>     | 14 (7.4)                           | <10 <sup>6</sup> |
|                                                                                                                                                                                                                                                                                                                  | 40 - <50               | 4,948                                                                                                                                                                                                                                                            | 130 (2.6)            | <10 <sup>6</sup>             | <10 <sup>6</sup>     | <10 <sup>6</sup>       | <10 <sup>6</sup>     | <10 <sup>6</sup>           | <10 <sup>6</sup>     | <10 <sup>6</sup>                   | <10 <sup>6</sup> |
|                                                                                                                                                                                                                                                                                                                  | 50 - <60               | 2,224                                                                                                                                                                                                                                                            | 35 (1.6)             | <10 <sup>6</sup>             | <10 <sup>6</sup>     | <10 <sup>6</sup>       | <10 <sup>6</sup>     | <10 <sup>6</sup>           | <10 <sup>6</sup>     | <10 <sup>6</sup>                   | <10 <sup>6</sup> |
|                                                                                                                                                                                                                                                                                                                  | 60 - <70               | 751                                                                                                                                                                                                                                                              | <10 <sup>6</sup>     | <10 <sup>6</sup>             | <10 <sup>6</sup>     | <10 <sup>6</sup>       | <10 <sup>6</sup>     | <10 <sup>6</sup>           | <10 <sup>6</sup>     | <10 <sup>6</sup>                   | <10 <sup>6</sup> |
|                                                                                                                                                                                                                                                                                                                  | 70 - <80               | 238                                                                                                                                                                                                                                                              | <10 <sup>6</sup>     | <10 <sup>6</sup>             | <10 <sup>6</sup>     | <10 <sup>6</sup>       | <10 <sup>6</sup>     | <10 <sup>6</sup>           | <10 <sup>6</sup>     | <10 <sup>6</sup>                   | <10 <sup>6</sup> |
|                                                                                                                                                                                                                                                                                                                  | 80 - <90               | 53                                                                                                                                                                                                                                                               | <10 <sup>6</sup>     | <10 <sup>6</sup>             | <10 <sup>6</sup>     | <10 <sup>6</sup>       | <10 <sup>6</sup>     | <10 <sup>6</sup>           | <10 <sup>6</sup>     | <10 <sup>6</sup>                   | <10 <sup>6</sup> |
|                                                                                                                                                                                                                                                                                                                  | 90 - <100              | <10 <sup>9</sup>                                                                                                                                                                                                                                                 | <10 <sup>6</sup>     | <10 <sup>6</sup>             | <10 <sup>6</sup>     | <10 <sup>6</sup>       | <10 <sup>6</sup>     | <10 <sup>6</sup>           | <10 <sup>6</sup>     | <10 <sup>6</sup>                   | <10 <sup>6</sup> |
|                                                                                                                                                                                                                                                                                                                  | 100 - <110             | <10 <sup>9</sup>                                                                                                                                                                                                                                                 | <10 <sup>6</sup>     | <10 <sup>6</sup>             | <10 <sup>6</sup>     | <10 <sup>6</sup>       | <10 <sup>6</sup>     | <10 <sup>6</sup>           | <10 <sup>6</sup>     | <10 <sup>6</sup>                   | <10 <sup>6</sup> |
| <b>Length of Stay (months)</b>                                                                                                                                                                                                                                                                                   |                        |                                                                                                                                                                                                                                                                  |                      |                              |                      |                        |                      |                            |                      |                                    |                  |
| 2017/18                                                                                                                                                                                                                                                                                                          | <1                     | 4,474                                                                                                                                                                                                                                                            | 19 (0.4)             | <10 <sup>6</sup>             | <10 <sup>6</sup>     | <10 <sup>6</sup>       | <10 <sup>6</sup>     | <10 <sup>6</sup>           | <10 <sup>6</sup>     | <10 <sup>6</sup>                   | <10 <sup>6</sup> |
|                                                                                                                                                                                                                                                                                                                  | 1-<6                   | 8,075                                                                                                                                                                                                                                                            | 65 (0.8)             | <10 <sup>6</sup>             | <10 <sup>6</sup>     | 13 (20.0)              | <10 <sup>6</sup>     | <10 <sup>6</sup>           | <10 <sup>6</sup>     | 24 (36.9)                          | <10 <sup>6</sup> |
|                                                                                                                                                                                                                                                                                                                  | 6-<12                  | 3,672                                                                                                                                                                                                                                                            | 51 (1.4)             | <10 <sup>6</sup>             | <10 <sup>6</sup>     | 14 (27.5)              | <10 <sup>6</sup>     | 10 (19.6)                  | <10 <sup>6</sup>     | 23 (45.1)                          | <10 <sup>6</sup> |
|                                                                                                                                                                                                                                                                                                                  | 12-<24                 | 2,832                                                                                                                                                                                                                                                            | 48 (1.7)             | <10 <sup>6</sup>             | <10 <sup>6</sup>     | 14 (29.2)              | <10 <sup>6</sup>     | 12 (25.0)                  | <10 <sup>6</sup>     | 21 (43.8)                          | <10 <sup>6</sup> |
|                                                                                                                                                                                                                                                                                                                  | 24+                    | 2,624                                                                                                                                                                                                                                                            | 61 (2.3)             | <10 <sup>6</sup>             | <10 <sup>6</sup>     | 32 (52.5)              | <10 <sup>6</sup>     | 28 (45.9)                  | <10 <sup>6</sup>     | 40 (65.6)                          | <10 <sup>6</sup> |
| 2018/19                                                                                                                                                                                                                                                                                                          | <1                     | 4,801                                                                                                                                                                                                                                                            | 49 (1.0)             | <10 <sup>6</sup>             | <10 <sup>6</sup>     | <10 <sup>6</sup>       | <10 <sup>6</sup>     | <10 <sup>6</sup>           | <10 <sup>6</sup>     | <10 <sup>6</sup>                   | <10 <sup>6</sup> |
|                                                                                                                                                                                                                                                                                                                  | 1-<6                   | 7,742                                                                                                                                                                                                                                                            | 106 (1.4)            | <10 <sup>6</sup>             | <10 <sup>6</sup>     | <10 <sup>6</sup>       | <10 <sup>6</sup>     | <10 <sup>6</sup>           | <10 <sup>6</sup>     | <10 <sup>6</sup>                   | <10 <sup>6</sup> |
|                                                                                                                                                                                                                                                                                                                  | 6-<12                  | 3,616                                                                                                                                                                                                                                                            | 54 (1.5)             | <10 <sup>6</sup>             | <10 <sup>6</sup>     | <10 <sup>6</sup>       | <10 <sup>6</sup>     | <10 <sup>6</sup>           | <10 <sup>6</sup>     | <10 <sup>6</sup>                   | <10 <sup>6</sup> |
|                                                                                                                                                                                                                                                                                                                  | 12-<24                 | 3,447                                                                                                                                                                                                                                                            | 57 (1.7)             | <10 <sup>6</sup>             | <10 <sup>6</sup>     | <10 <sup>6</sup>       | <10 <sup>6</sup>     | <10 <sup>6</sup>           | <10 <sup>6</sup>     | 10 (17.5)                          | <10 <sup>6</sup> |
|                                                                                                                                                                                                                                                                                                                  | 24+                    | 2,493                                                                                                                                                                                                                                                            | 60 (2.4)             | <10 <sup>6</sup>             | <10 <sup>6</sup>     | 13 (21.7)              | <10 <sup>6</sup>     | 13 (21.7)                  | <10 <sup>6</sup>     | 17 (28.3)                          | <10 <sup>6</sup> |
| 2019/20                                                                                                                                                                                                                                                                                                          | <1                     | 5,745                                                                                                                                                                                                                                                            | 70 (1.2)             | <10 <sup>6</sup>             | <10 <sup>6</sup>     | <10 <sup>6</sup>       | <10 <sup>6</sup>     | <10 <sup>6</sup>           | <10 <sup>6</sup>     | <10 <sup>6</sup>                   | <10 <sup>6</sup> |
|                                                                                                                                                                                                                                                                                                                  | 1-<6                   | 9,697                                                                                                                                                                                                                                                            | 177 (1.8)            | <10 <sup>6</sup>             | <10 <sup>6</sup>     | 10 (5.6)               | <10 <sup>6</sup>     | <10 <sup>6</sup>           | <10 <sup>6</sup>     | 12 (6.8)                           | <10 <sup>6</sup> |
|                                                                                                                                                                                                                                                                                                                  | 6-<12                  | 5,090                                                                                                                                                                                                                                                            | 120 (2.4)            | <10 <sup>6</sup>             | <10 <sup>6</sup>     | <10 <sup>6</sup>       | <10 <sup>6</sup>     | <10 <sup>6</sup>           | <10 <sup>6</sup>     | <10 <sup>6</sup>                   | <10 <sup>6</sup> |
|                                                                                                                                                                                                                                                                                                                  | 12-<24                 | 3,244                                                                                                                                                                                                                                                            | 52 (1.6)             | <10 <sup>6</sup>             | <10 <sup>6</sup>     | <10 <sup>6</sup>       | <10 <sup>6</sup>     | <10 <sup>6</sup>           | <10 <sup>6</sup>     | <10 <sup>6</sup>                   | <10 <sup>6</sup> |
|                                                                                                                                                                                                                                                                                                                  | 24+                    | 2,035                                                                                                                                                                                                                                                            | 44 (2.2)             | <10 <sup>6</sup>             | <10 <sup>6</sup>     | 10 (22.7)              | <10 <sup>6</sup>     | 11 (25.0)                  | <10 <sup>6</sup>     | 11 (25.0)                          | <10 <sup>6</sup> |
| <b>Ethnic Group</b>                                                                                                                                                                                                                                                                                              |                        |                                                                                                                                                                                                                                                                  |                      |                              |                      |                        |                      |                            |                      |                                    |                  |
| 2017/18                                                                                                                                                                                                                                                                                                          | White                  | 15,638                                                                                                                                                                                                                                                           | 192 (1.2)            | <10 <sup>6</sup>             | <10 <sup>6</sup>     | 56 (29.2)              | <10 <sup>6</sup>     | 40 (20.8)                  | <10 <sup>6</sup>     | 86 (44.8)                          | 11 (5.7)         |
|                                                                                                                                                                                                                                                                                                                  | Mixed                  | 431                                                                                                                                                                                                                                                              | <10 <sup>6</sup>     | <10 <sup>6</sup>             | <10 <sup>6</sup>     | <10 <sup>6</sup>       | <10 <sup>6</sup>     | <10 <sup>6</sup>           | <10 <sup>6</sup>     | <10 <sup>6</sup>                   | <10 <sup>6</sup> |
|                                                                                                                                                                                                                                                                                                                  | Asian or Asian British | 813                                                                                                                                                                                                                                                              | <10 <sup>6</sup>     | <10 <sup>6</sup>             | <10 <sup>6</sup>     | <10 <sup>6</sup>       | <10 <sup>6</sup>     | <10 <sup>6</sup>           | <10 <sup>6</sup>     | <10 <sup>6</sup>                   | <10 <sup>6</sup> |
|                                                                                                                                                                                                                                                                                                                  | Black or Black British | 404                                                                                                                                                                                                                                                              | <10 <sup>6</sup>     | <10 <sup>6</sup>             | <10 <sup>6</sup>     | <10 <sup>6</sup>       | <10 <sup>6</sup>     | <10 <sup>6</sup>           | <10 <sup>6</sup>     | <10 <sup>6</sup>                   | <10 <sup>6</sup> |
|                                                                                                                                                                                                                                                                                                                  | Chinese and Other      | 214                                                                                                                                                                                                                                                              | <10 <sup>6</sup>     | <10 <sup>6</sup>             | <10 <sup>6</sup>     | <10 <sup>6</sup>       | <10 <sup>6</sup>     | <10 <sup>6</sup>           | <10 <sup>6</sup>     | <10 <sup>6</sup>                   | <10 <sup>6</sup> |
|                                                                                                                                                                                                                                                                                                                  | Unclassified           | 372                                                                                                                                                                                                                                                              | <10 <sup>6</sup>     | <10 <sup>6</sup>             | <10 <sup>6</sup>     | <10 <sup>6</sup>       | <10 <sup>6</sup>     | <10 <sup>6</sup>           | <10 <sup>6</sup>     | <10 <sup>6</sup>                   | <10 <sup>6</sup> |
| 2018/19                                                                                                                                                                                                                                                                                                          | White                  | 14,911                                                                                                                                                                                                                                                           | 266 (1.8)            | <10 <sup>6</sup>             | <10 <sup>6</sup>     | 23 (8.6)               | <10 <sup>6</sup>     | 21 (7.9)                   | 12 (4.5)             | 36 (13.5)                          | 18 (6.8)         |
|                                                                                                                                                                                                                                                                                                                  | Mixed                  | 371                                                                                                                                                                                                                                                              | <10 <sup>6</sup>     | <10 <sup>6</sup>             | <10 <sup>6</sup>     | <10 <sup>6</sup>       | <10 <sup>6</sup>     | <10 <sup>6</sup>           | <10 <sup>6</sup>     | <10 <sup>6</sup>                   | <10 <sup>6</sup> |
|                                                                                                                                                                                                                                                                                                                  | Asian or Asian British | 726                                                                                                                                                                                                                                                              | <10 <sup>6</sup>     | <10 <sup>6</sup>             | <10 <sup>6</sup>     | <10 <sup>6</sup>       | <10 <sup>6</sup>     | <10 <sup>6</sup>           | <10 <sup>6</sup>     | <10 <sup>6</sup>                   | <10 <sup>6</sup> |
|                                                                                                                                                                                                                                                                                                                  | Black or Black British | 364                                                                                                                                                                                                                                                              | <10 <sup>6</sup>     | <10 <sup>6</sup>             | <10 <sup>6</sup>     | <10 <sup>6</sup>       | <10 <sup>6</sup>     | <10 <sup>6</sup>           | <10 <sup>6</sup>     | <10 <sup>6</sup>                   | <10 <sup>6</sup> |
|                                                                                                                                                                                                                                                                                                                  | Chinese and Other      | 167                                                                                                                                                                                                                                                              | <10 <sup>6</sup>     | <10 <sup>6</sup>             | <10 <sup>6</sup>     | <10 <sup>6</sup>       | <10 <sup>6</sup>     | <10 <sup>6</sup>           | <10 <sup>6</sup>     | <10 <sup>6</sup>                   | <10 <sup>6</sup> |
|                                                                                                                                                                                                                                                                                                                  | Unclassified           | 409                                                                                                                                                                                                                                                              | <10 <sup>6</sup>     | <10 <sup>6</sup>             | <10 <sup>6</sup>     | <10 <sup>6</sup>       | <10 <sup>6</sup>     | <10 <sup>6</sup>           | <10 <sup>6</sup>     | <10 <sup>6</sup>                   | <10 <sup>6</sup> |
| 2019/20                                                                                                                                                                                                                                                                                                          | White                  | 16,606                                                                                                                                                                                                                                                           | 364 (2.2)            | <10 <sup>6</sup>             | <10 <sup>6</sup>     | 24 (6.6)               | <10 <sup>6</sup>     | 17 (4.7)                   | <10 <sup>6</sup>     | 29 (8.0)                           | <10 <sup>6</sup> |
|                                                                                                                                                                                                                                                                                                                  | Mixed                  | 409                                                                                                                                                                                                                                                              | <10 <sup>6</sup>     | <10 <sup>6</sup>             | <10 <sup>6</sup>     | <10 <sup>6</sup>       | <10 <sup>6</sup>     | <10 <sup>6</sup>           | <10 <sup>6</sup>     | <10 <sup>6</sup>                   | <10 <sup>6</sup> |
|                                                                                                                                                                                                                                                                                                                  | Asian or Asian British | 755                                                                                                                                                                                                                                                              | <10 <sup>6</sup>     | <10 <sup>6</sup>             | <10 <sup>6</sup>     | <10 <sup>6</sup>       | <10 <sup>6</sup>     | <10 <sup>6</sup>           | <10 <sup>6</sup>     | <10 <sup>6</sup>                   | <10 <sup>6</sup> |
|                                                                                                                                                                                                                                                                                                                  | Black or Black British | 451                                                                                                                                                                                                                                                              | <10 <sup>6</sup>     | <10 <sup>6</sup>             | <10 <sup>6</sup>     | <10 <sup>6</sup>       | <10 <sup>6</sup>     | <10 <sup>6</sup>           | <10 <sup>6</sup>     | <10 <sup>6</sup>                   | <10 <sup>6</sup> |
|                                                                                                                                                                                                                                                                                                                  | Chinese and Other      | 163                                                                                                                                                                                                                                                              | <10 <sup>6</sup>     | <10 <sup>6</sup>             | <10 <sup>6</sup>     | <10 <sup>6</sup>       | <10 <sup>6</sup>     | <10 <sup>6</sup>           | <10 <sup>6</sup>     | <10 <sup>6</sup>                   | <10 <sup>6</sup> |
|                                                                                                                                                                                                                                                                                                                  | Unclassified           | 387                                                                                                                                                                                                                                                              | 11 (2.8)             | <10 <sup>6</sup>             | <10 <sup>6</sup>     | <10 <sup>6</sup>       | <10 <sup>6</sup>     | <10 <sup>6</sup>           | <10 <sup>6</sup>     | <10 <sup>6</sup>                   | <10 <sup>6</sup> |

<sup>1</sup>Eligible for indicator; <sup>2</sup>Achieve in current prison; <sup>3</sup>Achieve in previous prison; <sup>4</sup>Overall achievement - either current or previous prison; <sup>5</sup>Declined indicator; <sup>6</sup>Suppressed (<10) to avoid disclosure

| Indicator                      | The proportion of people who have received three or more prescriptions for an antipsychotic in the preceding 12 months, and who have a record of blood testing (fasting glucose, HbA1c, lipid profile, urea and electrolytes, full blood count, liver function tests), body mass index and blood pressure |                               |                        |                             |                        |                      |                        |                       |                             |                        |  |
|--------------------------------|-----------------------------------------------------------------------------------------------------------------------------------------------------------------------------------------------------------------------------------------------------------------------------------------------------------|-------------------------------|------------------------|-----------------------------|------------------------|----------------------|------------------------|-----------------------|-----------------------------|------------------------|--|
|                                | Community achievement 2019/20: No direct comparison in QOF - just percentage of patients with MH diagnosis of schizophrenia, bipolar affective disorder and other psychoses who have record of BP and BMI in the last 12 months (80.28% and 74.40% respectively)                                          |                               |                        |                             |                        |                      |                        |                       |                             |                        |  |
|                                | Group: Mental health                                                                                                                                                                                                                                                                                      |                               |                        |                             |                        |                      |                        |                       |                             |                        |  |
| Variable                       | Eligible                                                                                                                                                                                                                                                                                                  | Full blood count (% eligible) |                        | Liver function (% eligible) |                        | BMI (% eligible)     |                        | Declined <sup>5</sup> | Blood Pressure (% eligible) |                        |  |
|                                |                                                                                                                                                                                                                                                                                                           | Satisfy <sup>2</sup>          | Elsewhere <sup>3</sup> | Satisfy <sup>2</sup>        | Elsewhere <sup>3</sup> | Satisfy <sup>2</sup> | Elsewhere <sup>3</sup> |                       | Satisfy <sup>2</sup>        | Elsewhere <sup>3</sup> |  |
| 2018/19                        | 10 - <20                                                                                                                                                                                                                                                                                                  | <10 <sup>6</sup>              | <10 <sup>6</sup>       | <10 <sup>6</sup>            | <10 <sup>6</sup>       | <10 <sup>6</sup>     | <10 <sup>6</sup>       | <10 <sup>6</sup>      | <10 <sup>6</sup>            | <10 <sup>6</sup>       |  |
|                                | 20 - <30                                                                                                                                                                                                                                                                                                  | 68                            | <10 <sup>6</sup>       | <10 <sup>6</sup>            | <10 <sup>6</sup>       | 19 (27.9)            | <10 <sup>6</sup>       | <10 <sup>6</sup>      | 21 (30.9)                   | <10 <sup>6</sup>       |  |
|                                | 30 - <40                                                                                                                                                                                                                                                                                                  | 124                           | 15 (12.1)              | 10 (8.1)                    | 15 (12.1)              | 32 (25.8)            | <10 <sup>6</sup>       | <10 <sup>6</sup>      | 32 (25.8)                   | <10 <sup>6</sup>       |  |
|                                | 40 - <50                                                                                                                                                                                                                                                                                                  | 85                            | 14 (16.5)              | <10 <sup>6</sup>            | 10 (11.8)              | 24 (28.2)            | <10 <sup>6</sup>       | <10 <sup>6</sup>      | 25 (29.4)                   | <10 <sup>6</sup>       |  |
|                                | 50 - <60                                                                                                                                                                                                                                                                                                  | 31                            | <10 <sup>6</sup>       | <10 <sup>6</sup>            | <10 <sup>6</sup>       | <10 <sup>6</sup>     | <10 <sup>6</sup>       | <10 <sup>6</sup>      | 11 (35.5)                   | <10 <sup>6</sup>       |  |
|                                | 60 - <70                                                                                                                                                                                                                                                                                                  | <10 <sup>6</sup>              | <10 <sup>6</sup>       | <10 <sup>6</sup>            | <10 <sup>6</sup>       | <10 <sup>6</sup>     | <10 <sup>6</sup>       | <10 <sup>6</sup>      | <10 <sup>6</sup>            | <10 <sup>6</sup>       |  |
|                                | 70 - <80                                                                                                                                                                                                                                                                                                  | <10 <sup>6</sup>              | <10 <sup>6</sup>       | <10 <sup>6</sup>            | <10 <sup>6</sup>       | <10 <sup>6</sup>     | <10 <sup>6</sup>       | <10 <sup>6</sup>      | <10 <sup>6</sup>            | <10 <sup>6</sup>       |  |
|                                | 80 - <90                                                                                                                                                                                                                                                                                                  | <10 <sup>6</sup>              | <10 <sup>6</sup>       | <10 <sup>6</sup>            | <10 <sup>6</sup>       | <10 <sup>6</sup>     | <10 <sup>6</sup>       | <10 <sup>6</sup>      | <10 <sup>6</sup>            | <10 <sup>6</sup>       |  |
|                                | 90 - <100                                                                                                                                                                                                                                                                                                 | <10 <sup>6</sup>              | <10 <sup>6</sup>       | <10 <sup>6</sup>            | <10 <sup>6</sup>       | <10 <sup>6</sup>     | <10 <sup>6</sup>       | <10 <sup>6</sup>      | <10 <sup>6</sup>            | <10 <sup>6</sup>       |  |
|                                | 100 - <110                                                                                                                                                                                                                                                                                                | <10 <sup>6</sup>              | <10 <sup>6</sup>       | <10 <sup>6</sup>            | <10 <sup>6</sup>       | <10 <sup>6</sup>     | <10 <sup>6</sup>       | <10 <sup>6</sup>      | <10 <sup>6</sup>            | <10 <sup>6</sup>       |  |
| 2019/20                        | 10 - <20                                                                                                                                                                                                                                                                                                  | <10 <sup>6</sup>              | <10 <sup>6</sup>       | <10 <sup>6</sup>            | <10 <sup>6</sup>       | <10 <sup>6</sup>     | <10 <sup>6</sup>       | <10 <sup>6</sup>      | <10 <sup>6</sup>            | <10 <sup>6</sup>       |  |
|                                | 20 - <30                                                                                                                                                                                                                                                                                                  | 92                            | <10 <sup>6</sup>       | <10 <sup>6</sup>            | <10 <sup>6</sup>       | <10 <sup>6</sup>     | <10 <sup>6</sup>       | <10 <sup>6</sup>      | <10 <sup>6</sup>            | <10 <sup>6</sup>       |  |
|                                | 30 - <40                                                                                                                                                                                                                                                                                                  | 188                           | 14 (7.4)               | <10 <sup>6</sup>            | <10 <sup>6</sup>       | <10 <sup>6</sup>     | <10 <sup>6</sup>       | <10 <sup>6</sup>      | 23 (12.2)                   | <10 <sup>6</sup>       |  |
|                                | 40 - <50                                                                                                                                                                                                                                                                                                  | 130                           | 10 (7.7)               | <10 <sup>6</sup>            | <10 <sup>6</sup>       | <10 <sup>6</sup>     | <10 <sup>6</sup>       | <10 <sup>6</sup>      | 20 (15.4)                   | <10 <sup>6</sup>       |  |
|                                | 50 - <60                                                                                                                                                                                                                                                                                                  | 35                            | <10 <sup>6</sup>       | <10 <sup>6</sup>            | <10 <sup>6</sup>       | <10 <sup>6</sup>     | <10 <sup>6</sup>       | <10 <sup>6</sup>      | <10 <sup>6</sup>            | <10 <sup>6</sup>       |  |
|                                | 60 - <70                                                                                                                                                                                                                                                                                                  | <10 <sup>6</sup>              | <10 <sup>6</sup>       | <10 <sup>6</sup>            | <10 <sup>6</sup>       | <10 <sup>6</sup>     | <10 <sup>6</sup>       | <10 <sup>6</sup>      | <10 <sup>6</sup>            | <10 <sup>6</sup>       |  |
|                                | 70 - <80                                                                                                                                                                                                                                                                                                  | <10 <sup>6</sup>              | <10 <sup>6</sup>       | <10 <sup>6</sup>            | <10 <sup>6</sup>       | <10 <sup>6</sup>     | <10 <sup>6</sup>       | <10 <sup>6</sup>      | <10 <sup>6</sup>            | <10 <sup>6</sup>       |  |
|                                | 80 - <90                                                                                                                                                                                                                                                                                                  | <10 <sup>6</sup>              | <10 <sup>6</sup>       | <10 <sup>6</sup>            | <10 <sup>6</sup>       | <10 <sup>6</sup>     | <10 <sup>6</sup>       | <10 <sup>6</sup>      | <10 <sup>6</sup>            | <10 <sup>6</sup>       |  |
|                                | 90 - <100                                                                                                                                                                                                                                                                                                 | <10 <sup>6</sup>              | <10 <sup>6</sup>       | <10 <sup>6</sup>            | <10 <sup>6</sup>       | <10 <sup>6</sup>     | <10 <sup>6</sup>       | <10 <sup>6</sup>      | <10 <sup>6</sup>            | <10 <sup>6</sup>       |  |
|                                | 100 - <110                                                                                                                                                                                                                                                                                                | <10 <sup>6</sup>              | <10 <sup>6</sup>       | <10 <sup>6</sup>            | <10 <sup>6</sup>       | <10 <sup>6</sup>     | <10 <sup>6</sup>       | <10 <sup>6</sup>      | <10 <sup>6</sup>            | <10 <sup>6</sup>       |  |
| <b>Length of Stay (months)</b> |                                                                                                                                                                                                                                                                                                           |                               |                        |                             |                        |                      |                        |                       |                             |                        |  |
| 2017/18                        | <1                                                                                                                                                                                                                                                                                                        | 19                            | <10 <sup>6</sup>       | <10 <sup>6</sup>            | <10 <sup>6</sup>       | 18 (94.7)            | <10 <sup>6</sup>       | <10 <sup>6</sup>      | 18 (94.7)                   | <10 <sup>6</sup>       |  |
|                                | 1-6                                                                                                                                                                                                                                                                                                       | 65                            | 23 (35.4)              | <10 <sup>6</sup>            | 22 (33.8)              | 49 (75.4)            | <10 <sup>6</sup>       | <10 <sup>6</sup>      | 56 (86.2)                   | <10 <sup>6</sup>       |  |
|                                | 6-<12                                                                                                                                                                                                                                                                                                     | 51                            | 24 (47.1)              | <10 <sup>6</sup>            | 23 (45.1)              | 41 (80.4)            | <10 <sup>6</sup>       | <10 <sup>6</sup>      | 42 (82.4)                   | <10 <sup>6</sup>       |  |
|                                | 12-<24                                                                                                                                                                                                                                                                                                    | 48                            | 22 (45.8)              | <10 <sup>6</sup>            | 19 (39.6)              | 29 (60.4)            | <10 <sup>6</sup>       | <10 <sup>6</sup>      | 34 (70.8)                   | <10 <sup>6</sup>       |  |
|                                | 24+                                                                                                                                                                                                                                                                                                       | 61                            | 43 (70.5)              | <10 <sup>6</sup>            | 40 (65.6)              | 42 (68.9)            | <10 <sup>6</sup>       | <10 <sup>6</sup>      | 53 (86.9)                   | <10 <sup>6</sup>       |  |
| 2018/19                        | <1                                                                                                                                                                                                                                                                                                        | 49                            | <10 <sup>6</sup>       | <10 <sup>6</sup>            | <10 <sup>6</sup>       | 12 (24.5)            | <10 <sup>6</sup>       | <10 <sup>6</sup>      | 13 (26.5)                   | <10 <sup>6</sup>       |  |
|                                | 1-6                                                                                                                                                                                                                                                                                                       | 106                           | <10 <sup>6</sup>       | <10 <sup>6</sup>            | <10 <sup>6</sup>       | 20 (18.9)            | <10 <sup>6</sup>       | <10 <sup>6</sup>      | 20 (18.9)                   | <10 <sup>6</sup>       |  |
|                                | 6-<12                                                                                                                                                                                                                                                                                                     | 54                            | <10 <sup>6</sup>       | <10 <sup>6</sup>            | <10 <sup>6</sup>       | 16 (29.6)            | <10 <sup>6</sup>       | <10 <sup>6</sup>      | 17 (31.5)                   | <10 <sup>6</sup>       |  |
|                                | 12-<24                                                                                                                                                                                                                                                                                                    | 57                            | 10 (17.5)              | <10 <sup>6</sup>            | <10 <sup>6</sup>       | 22 (38.6)            | <10 <sup>6</sup>       | <10 <sup>6</sup>      | 23 (40.4)                   | <10 <sup>6</sup>       |  |
|                                | 24+                                                                                                                                                                                                                                                                                                       | 60                            | 19 (31.7)              | <10 <sup>6</sup>            | 17 (28.3)              | 25 (41.7)            | <10 <sup>6</sup>       | <10 <sup>6</sup>      | 28 (46.7)                   | <10 <sup>6</sup>       |  |
| 2019/20                        | <1                                                                                                                                                                                                                                                                                                        | 70                            | <10 <sup>6</sup>       | <10 <sup>6</sup>            | <10 <sup>6</sup>       | <10 <sup>6</sup>     | <10 <sup>6</sup>       | <10 <sup>6</sup>      | <10 <sup>6</sup>            | <10 <sup>6</sup>       |  |
|                                | 1-6                                                                                                                                                                                                                                                                                                       | 177                           | 12 (6.8)               | <10 <sup>6</sup>            | <10 <sup>6</sup>       | <10 <sup>6</sup>     | <10 <sup>6</sup>       | <10 <sup>6</sup>      | 18 (10.2)                   | <10 <sup>6</sup>       |  |
|                                | 6-<12                                                                                                                                                                                                                                                                                                     | 120                           | <10 <sup>6</sup>       | <10 <sup>6</sup>            | <10 <sup>6</sup>       | <10 <sup>6</sup>     | <10 <sup>6</sup>       | <10 <sup>6</sup>      | 11 (9.2)                    | <10 <sup>6</sup>       |  |
|                                | 12-<24                                                                                                                                                                                                                                                                                                    | 52                            | <10 <sup>6</sup>       | <10 <sup>6</sup>            | <10 <sup>6</sup>       | <10 <sup>6</sup>     | <10 <sup>6</sup>       | <10 <sup>6</sup>      | <10 <sup>6</sup>            | <10 <sup>6</sup>       |  |
|                                | 24+                                                                                                                                                                                                                                                                                                       | 44                            | 12 (27.3)              | <10 <sup>6</sup>            | <10 <sup>6</sup>       | 11 (25.0)            | <10 <sup>6</sup>       | <10 <sup>6</sup>      | 17 (38.6)                   | <10 <sup>6</sup>       |  |
| <b>Ethnic Group</b>            |                                                                                                                                                                                                                                                                                                           |                               |                        |                             |                        |                      |                        |                       |                             |                        |  |
| 2017/18                        | White                                                                                                                                                                                                                                                                                                     | 192                           | 89 (46.4)              | 10 (5.2)                    | 82 (42.7)              | 142 (74.0)           | <10 <sup>6</sup>       | <10 <sup>6</sup>      | 161 (83.9)                  | <10 <sup>6</sup>       |  |
|                                | Mixed                                                                                                                                                                                                                                                                                                     | <10 <sup>6</sup>              | <10 <sup>6</sup>       | <10 <sup>6</sup>            | <10 <sup>6</sup>       | <10 <sup>6</sup>     | <10 <sup>6</sup>       | <10 <sup>6</sup>      | <10 <sup>6</sup>            | <10 <sup>6</sup>       |  |
|                                | Asian or Asian British                                                                                                                                                                                                                                                                                    | <10 <sup>6</sup>              | <10 <sup>6</sup>       | <10 <sup>6</sup>            | <10 <sup>6</sup>       | <10 <sup>6</sup>     | <10 <sup>6</sup>       | <10 <sup>6</sup>      | <10 <sup>6</sup>            | <10 <sup>6</sup>       |  |
|                                | Black or Black British                                                                                                                                                                                                                                                                                    | <10 <sup>6</sup>              | <10 <sup>6</sup>       | <10 <sup>6</sup>            | <10 <sup>6</sup>       | <10 <sup>6</sup>     | <10 <sup>6</sup>       | <10 <sup>6</sup>      | <10 <sup>6</sup>            | <10 <sup>6</sup>       |  |
|                                | Chinese and Other                                                                                                                                                                                                                                                                                         | <10 <sup>6</sup>              | <10 <sup>6</sup>       | <10 <sup>6</sup>            | <10 <sup>6</sup>       | <10 <sup>6</sup>     | <10 <sup>6</sup>       | <10 <sup>6</sup>      | <10 <sup>6</sup>            | <10 <sup>6</sup>       |  |
|                                | Unclassified                                                                                                                                                                                                                                                                                              | <10 <sup>6</sup>              | <10 <sup>6</sup>       | <10 <sup>6</sup>            | <10 <sup>6</sup>       | <10 <sup>6</sup>     | <10 <sup>6</sup>       | <10 <sup>6</sup>      | <10 <sup>6</sup>            | <10 <sup>6</sup>       |  |
| 2018/19                        | White                                                                                                                                                                                                                                                                                                     | 266                           | 39 (14.7)              | 19 (7.1)                    | 31 (11.7)              | 77 (28.9)            | 15 (5.6)               | <10 <sup>6</sup>      | 84 (31.6)                   | 14 (5.3)               |  |
|                                | Mixed                                                                                                                                                                                                                                                                                                     | <10 <sup>6</sup>              | <10 <sup>6</sup>       | <10 <sup>6</sup>            | <10 <sup>6</sup>       | <10 <sup>6</sup>     | <10 <sup>6</sup>       | <10 <sup>6</sup>      | <10 <sup>6</sup>            | <10 <sup>6</sup>       |  |
|                                | Asian or Asian British                                                                                                                                                                                                                                                                                    | <10 <sup>6</sup>              | <10 <sup>6</sup>       | <10 <sup>6</sup>            | <10 <sup>6</sup>       | <10 <sup>6</sup>     | <10 <sup>6</sup>       | <10 <sup>6</sup>      | <10 <sup>6</sup>            | <10 <sup>6</sup>       |  |
|                                | Black or Black British                                                                                                                                                                                                                                                                                    | <10 <sup>6</sup>              | <10 <sup>6</sup>       | <10 <sup>6</sup>            | <10 <sup>6</sup>       | <10 <sup>6</sup>     | <10 <sup>6</sup>       | <10 <sup>6</sup>      | <10 <sup>6</sup>            | <10 <sup>6</sup>       |  |
|                                | Chinese and Other                                                                                                                                                                                                                                                                                         | <10 <sup>6</sup>              | <10 <sup>6</sup>       | <10 <sup>6</sup>            | <10 <sup>6</sup>       | <10 <sup>6</sup>     | <10 <sup>6</sup>       | <10 <sup>6</sup>      | <10 <sup>6</sup>            | <10 <sup>6</sup>       |  |
|                                | Unclassified                                                                                                                                                                                                                                                                                              | <10 <sup>6</sup>              | <10 <sup>6</sup>       | <10 <sup>6</sup>            | <10 <sup>6</sup>       | <10 <sup>6</sup>     | <10 <sup>6</sup>       | <10 <sup>6</sup>      | <10 <sup>6</sup>            | <10 <sup>6</sup>       |  |
| 2019/20                        | White                                                                                                                                                                                                                                                                                                     | 364                           | 31 (8.5)               | 12 (3.3)                    | 15 (4.1)               | 10 (2.7)             | <10 <sup>6</sup>       | <10 <sup>6</sup>      | 55 (15.1)                   | <10 <sup>6</sup>       |  |
|                                | Mixed                                                                                                                                                                                                                                                                                                     | <10 <sup>6</sup>              | <10 <sup>6</sup>       | <10 <sup>6</sup>            | <10 <sup>6</sup>       | <10 <sup>6</sup>     | <10 <sup>6</sup>       | <10 <sup>6</sup>      | <10 <sup>6</sup>            | <10 <sup>6</sup>       |  |
|                                | Asian or Asian British                                                                                                                                                                                                                                                                                    | <10 <sup>6</sup>              | <10 <sup>6</sup>       | <10 <sup>6</sup>            | <10 <sup>6</sup>       | <10 <sup>6</sup>     | <10 <sup>6</sup>       | <10 <sup>6</sup>      | <10 <sup>6</sup>            | <10 <sup>6</sup>       |  |
|                                | Black or Black British                                                                                                                                                                                                                                                                                    | <10 <sup>6</sup>              | <10 <sup>6</sup>       | <10 <sup>6</sup>            | <10 <sup>6</sup>       | <10 <sup>6</sup>     | <10 <sup>6</sup>       | <10 <sup>6</sup>      | <10 <sup>6</sup>            | <10 <sup>6</sup>       |  |
|                                | Chinese and Other                                                                                                                                                                                                                                                                                         | <10 <sup>6</sup>              | <10 <sup>6</sup>       | <10 <sup>6</sup>            | <10 <sup>6</sup>       | <10 <sup>6</sup>     | <10 <sup>6</sup>       | <10 <sup>6</sup>      | <10 <sup>6</sup>            | <10 <sup>6</sup>       |  |
|                                | Unclassified                                                                                                                                                                                                                                                                                              | 11                            | <10 <sup>6</sup>       | <10 <sup>6</sup>            | <10 <sup>6</sup>       | <10 <sup>6</sup>     | <10 <sup>6</sup>       | <10 <sup>6</sup>      | <10 <sup>6</sup>            | <10 <sup>6</sup>       |  |

<sup>1</sup>Eligible for indicator; <sup>2</sup>Achieve in current prison; <sup>3</sup>Achieve in previous prison; <sup>4</sup>Overall achievement - either current or previous prison; <sup>5</sup>Declined indicator; <sup>6</sup>Suppressed (<10) to avoid disclosure

| Indicator                   | The proportion of people who have received three or more prescriptions for an antipsychotic in the preceding 12 months, and who have a record of blood testing (fasting glucose, HbA1c, lipid profile, urea and electrolytes, full blood count, liver function tests), body mass index and blood pressure |            |                                      | Community achievement 2019/20 (%): No direct comparison in QOF - just percentage of patients with MH diagnosis of schizophrenia, bipolar affective disorder and other psychoses who have record of BP and BMI in the last 12 months (80.28% and 74.40% respectively) |
|-----------------------------|-----------------------------------------------------------------------------------------------------------------------------------------------------------------------------------------------------------------------------------------------------------------------------------------------------------|------------|--------------------------------------|----------------------------------------------------------------------------------------------------------------------------------------------------------------------------------------------------------------------------------------------------------------------|
|                             | Variable                                                                                                                                                                                                                                                                                                  | Population | Eligible <sup>1</sup> (% population) |                                                                                                                                                                                                                                                                      |
| <b>Group: Mental health</b> |                                                                                                                                                                                                                                                                                                           |            |                                      |                                                                                                                                                                                                                                                                      |
| <b>Year</b>                 |                                                                                                                                                                                                                                                                                                           |            |                                      |                                                                                                                                                                                                                                                                      |
|                             | 2017/18                                                                                                                                                                                                                                                                                                   | 21,677     | 244 (1.1)                            | 88 (36.1)                                                                                                                                                                                                                                                            |
|                             | 2018/19                                                                                                                                                                                                                                                                                                   | 22,099     | 326 (1.5)                            | 45 (13.8)                                                                                                                                                                                                                                                            |
|                             | 2019/20                                                                                                                                                                                                                                                                                                   | 25,811     | 463 (1.8)                            | 24 (5.2)                                                                                                                                                                                                                                                             |
| <b>Prison</b>               |                                                                                                                                                                                                                                                                                                           |            |                                      |                                                                                                                                                                                                                                                                      |
| 2017/18                     | Prison 1                                                                                                                                                                                                                                                                                                  | 1,323      | 11 (0.8)                             | <10 <sup>6</sup>                                                                                                                                                                                                                                                     |
|                             | Prison 2                                                                                                                                                                                                                                                                                                  | 3,261      | 36 (1.1)                             | <10 <sup>6</sup>                                                                                                                                                                                                                                                     |
|                             | Prison 3                                                                                                                                                                                                                                                                                                  | 2,623      | 38 (1.4)                             | 10 (26.3)                                                                                                                                                                                                                                                            |
|                             | Prison 4                                                                                                                                                                                                                                                                                                  | 2,089      | 22 (1.1)                             | <10 <sup>6</sup>                                                                                                                                                                                                                                                     |
|                             | Prison 5                                                                                                                                                                                                                                                                                                  | 637        | <10 <sup>6</sup>                     | <10 <sup>6</sup>                                                                                                                                                                                                                                                     |
|                             | Prison 6                                                                                                                                                                                                                                                                                                  | 1,552      | <10 <sup>6</sup>                     | <10 <sup>6</sup>                                                                                                                                                                                                                                                     |
|                             | Prison 7                                                                                                                                                                                                                                                                                                  | 635        | 15 (2.4)                             | <10 <sup>6</sup>                                                                                                                                                                                                                                                     |
|                             | Prison 8                                                                                                                                                                                                                                                                                                  | 1,085      | 27 (2.5)                             | 12 (44.4)                                                                                                                                                                                                                                                            |
|                             | Prison 9                                                                                                                                                                                                                                                                                                  | 981        | 28 (2.9)                             | 18 (64.3)                                                                                                                                                                                                                                                            |
|                             | Prison 10                                                                                                                                                                                                                                                                                                 | 2,523      | 19 (0.8)                             | <10 <sup>6</sup>                                                                                                                                                                                                                                                     |
|                             | Prison 11                                                                                                                                                                                                                                                                                                 | 3,470      | 23 (0.7)                             | <10 <sup>6</sup>                                                                                                                                                                                                                                                     |
|                             | Prison 12                                                                                                                                                                                                                                                                                                 | 815        | <10 <sup>6</sup>                     | <10 <sup>6</sup>                                                                                                                                                                                                                                                     |
|                             | Prison 13                                                                                                                                                                                                                                                                                                 | 683        | 15 (2.2)                             | 11 (73.3)                                                                                                                                                                                                                                                            |
| 2018/19                     | Prison 1                                                                                                                                                                                                                                                                                                  | 1,333      | 16 (1.2)                             | <10 <sup>6</sup>                                                                                                                                                                                                                                                     |
|                             | Prison 2                                                                                                                                                                                                                                                                                                  | 2,705      | 43 (1.6)                             | <10 <sup>6</sup>                                                                                                                                                                                                                                                     |
|                             | Prison 3                                                                                                                                                                                                                                                                                                  | 2,522      | 34 (1.3)                             | <10 <sup>6</sup>                                                                                                                                                                                                                                                     |
|                             | Prison 4                                                                                                                                                                                                                                                                                                  | 2,349      | 37 (1.6)                             | <10 <sup>6</sup>                                                                                                                                                                                                                                                     |
|                             | Prison 5                                                                                                                                                                                                                                                                                                  | 676        | <10 <sup>6</sup>                     | <10 <sup>6</sup>                                                                                                                                                                                                                                                     |
|                             | Prison 6                                                                                                                                                                                                                                                                                                  | 1,513      | <10 <sup>6</sup>                     | <10 <sup>6</sup>                                                                                                                                                                                                                                                     |
|                             | Prison 7                                                                                                                                                                                                                                                                                                  | 654        | 45 (6.9)                             | <10 <sup>6</sup>                                                                                                                                                                                                                                                     |
|                             | Prison 8                                                                                                                                                                                                                                                                                                  | 1,148      | 30 (2.6)                             | <10 <sup>6</sup>                                                                                                                                                                                                                                                     |
|                             | Prison 9                                                                                                                                                                                                                                                                                                  | 996        | 28 (2.8)                             | 13 (46.4)                                                                                                                                                                                                                                                            |
|                             | Prison 10                                                                                                                                                                                                                                                                                                 | 2,717      | <10 <sup>6</sup>                     | <10 <sup>6</sup>                                                                                                                                                                                                                                                     |
|                             | Prison 11                                                                                                                                                                                                                                                                                                 | 4,020      | 73 (1.8)                             | <10 <sup>6</sup>                                                                                                                                                                                                                                                     |
|                             | Prison 12                                                                                                                                                                                                                                                                                                 | 792        | <10 <sup>6</sup>                     | <10 <sup>6</sup>                                                                                                                                                                                                                                                     |
|                             | Prison 13                                                                                                                                                                                                                                                                                                 | 674        | 17 (2.5)                             | <10 <sup>6</sup>                                                                                                                                                                                                                                                     |
| 2019/20                     | Prison 1                                                                                                                                                                                                                                                                                                  | 1,410      | 16 (1.1)                             | <10 <sup>6</sup>                                                                                                                                                                                                                                                     |
|                             | Prison 2                                                                                                                                                                                                                                                                                                  | 2,979      | 43 (1.4)                             | <10 <sup>6</sup>                                                                                                                                                                                                                                                     |
|                             | Prison 3                                                                                                                                                                                                                                                                                                  | 2,809      | 55 (2.0)                             | <10 <sup>6</sup>                                                                                                                                                                                                                                                     |
|                             | Prison 4                                                                                                                                                                                                                                                                                                  | 2,651      | 35 (1.3)                             | <10 <sup>6</sup>                                                                                                                                                                                                                                                     |
|                             | Prison 5                                                                                                                                                                                                                                                                                                  | 616        | <10 <sup>6</sup>                     | <10 <sup>6</sup>                                                                                                                                                                                                                                                     |
|                             | Prison 6                                                                                                                                                                                                                                                                                                  | 1,533      | <10 <sup>6</sup>                     | <10 <sup>6</sup>                                                                                                                                                                                                                                                     |
|                             | Prison 7                                                                                                                                                                                                                                                                                                  | 860        | 75 (8.7)                             | <10 <sup>6</sup>                                                                                                                                                                                                                                                     |
|                             | Prison 8                                                                                                                                                                                                                                                                                                  | 1,385      | 38 (2.7)                             | <10 <sup>6</sup>                                                                                                                                                                                                                                                     |
|                             | Prison 9                                                                                                                                                                                                                                                                                                  | 1,092      | 31 (2.8)                             | 12 (38.7)                                                                                                                                                                                                                                                            |
|                             | Prison 10                                                                                                                                                                                                                                                                                                 | 3,577      | 38 (1.1)                             | <10 <sup>6</sup>                                                                                                                                                                                                                                                     |
|                             | Prison 11                                                                                                                                                                                                                                                                                                 | 5,348      | 97 (1.8)                             | <10 <sup>6</sup>                                                                                                                                                                                                                                                     |
|                             | Prison 12                                                                                                                                                                                                                                                                                                 | 805        | <10 <sup>6</sup>                     | <10 <sup>6</sup>                                                                                                                                                                                                                                                     |
|                             | Prison 13                                                                                                                                                                                                                                                                                                 | 746        | 21 (2.8)                             | <10 <sup>6</sup>                                                                                                                                                                                                                                                     |
| <b>Prison category</b>      |                                                                                                                                                                                                                                                                                                           |            |                                      |                                                                                                                                                                                                                                                                      |
| 2017/18                     | A                                                                                                                                                                                                                                                                                                         | 1,664      | 43 (2.6)                             | 29 (67.4)                                                                                                                                                                                                                                                            |
|                             | B                                                                                                                                                                                                                                                                                                         | 9,254      | 78 (0.8)                             | 15 (19.2)                                                                                                                                                                                                                                                            |
|                             | C                                                                                                                                                                                                                                                                                                         | 6,035      | 71 (1.2)                             | 20 (28.2)                                                                                                                                                                                                                                                            |
|                             | Closed                                                                                                                                                                                                                                                                                                    | 1,720      | 42 (2.4)                             | 20 (47.6)                                                                                                                                                                                                                                                            |
|                             | D                                                                                                                                                                                                                                                                                                         | 2,189      | <10 <sup>6</sup>                     | <10 <sup>6</sup>                                                                                                                                                                                                                                                     |
|                             | YOI                                                                                                                                                                                                                                                                                                       | 815        | <10 <sup>6</sup>                     | <10 <sup>6</sup>                                                                                                                                                                                                                                                     |
| 2018/19                     | A                                                                                                                                                                                                                                                                                                         | 1,670      | 45 (2.7)                             | 19 (42.2)                                                                                                                                                                                                                                                            |
|                             | B                                                                                                                                                                                                                                                                                                         | 9,442      | 116 (1.2)                            | <10 <sup>6</sup>                                                                                                                                                                                                                                                     |
|                             | C                                                                                                                                                                                                                                                                                                         | 6,204      | 87 (1.4)                             | 11 (12.6)                                                                                                                                                                                                                                                            |
|                             | Closed                                                                                                                                                                                                                                                                                                    | 1,802      | 75 (4.2)                             | <10 <sup>6</sup>                                                                                                                                                                                                                                                     |
|                             | D                                                                                                                                                                                                                                                                                                         | 2,189      | <10 <sup>6</sup>                     | <10 <sup>6</sup>                                                                                                                                                                                                                                                     |
|                             | YOI                                                                                                                                                                                                                                                                                                       | 792        | <10 <sup>6</sup>                     | <10 <sup>6</sup>                                                                                                                                                                                                                                                     |
| 2019/20                     | A                                                                                                                                                                                                                                                                                                         | 1,838      | 52 (2.8)                             | 14 (26.9)                                                                                                                                                                                                                                                            |
|                             | B                                                                                                                                                                                                                                                                                                         | 11,904     | 178 (1.5)                            | <10 <sup>6</sup>                                                                                                                                                                                                                                                     |
|                             | C                                                                                                                                                                                                                                                                                                         | 6,870      | 106 (1.5)                            | <10 <sup>6</sup>                                                                                                                                                                                                                                                     |
|                             | Closed                                                                                                                                                                                                                                                                                                    | 2,245      | 113 (5.0)                            | <10 <sup>6</sup>                                                                                                                                                                                                                                                     |
|                             | D                                                                                                                                                                                                                                                                                                         | 2,149      | 11 (0.5)                             | <10 <sup>6</sup>                                                                                                                                                                                                                                                     |
|                             | YOI                                                                                                                                                                                                                                                                                                       | 805        | <10 <sup>6</sup>                     | <10 <sup>6</sup>                                                                                                                                                                                                                                                     |
| <b>Gender</b>               |                                                                                                                                                                                                                                                                                                           |            |                                      |                                                                                                                                                                                                                                                                      |
| 2017/18                     | F                                                                                                                                                                                                                                                                                                         | 1,699      | 42 (2.5)                             | 20 (47.6)                                                                                                                                                                                                                                                            |
|                             | M                                                                                                                                                                                                                                                                                                         | 19,977     | 202 (1.0)                            | 68 (33.7)                                                                                                                                                                                                                                                            |
| 2018/19                     | F                                                                                                                                                                                                                                                                                                         | 1,802      | 75 (4.2)                             | <10 <sup>6</sup>                                                                                                                                                                                                                                                     |
|                             | M                                                                                                                                                                                                                                                                                                         | 20,295     | 251 (1.2)                            | 37 (14.7)                                                                                                                                                                                                                                                            |
| 2019/20                     | F                                                                                                                                                                                                                                                                                                         | 1,376      | 38 (2.8)                             | <10 <sup>6</sup>                                                                                                                                                                                                                                                     |
|                             | M                                                                                                                                                                                                                                                                                                         | 23,570     | 350 (1.5)                            | 20 (5.7)                                                                                                                                                                                                                                                             |

<sup>1</sup>Eligible for indicator; <sup>2</sup>Achieve in current prison; <sup>3</sup>Achieve in previous prison; <sup>4</sup>Overall achievement - either current or previous prison; <sup>5</sup>Declined indicator; <sup>6</sup>Suppressed (<10) to avoid disclosure

| Indicator                      | The proportion of people who have received three or more prescriptions for an antipsychotic in the preceding 12 months, and who have a record of blood testing (fasting glucose, HbA1c, lipid profile, urea and electrolytes, full blood count, liver function tests), body mass index and blood pressure |                    |                                      | Community achievement 2019/20 (%): No direct comparison in QOF - just percentage of patients with MH diagnosis of schizophrenia, bipolar affective disorder and other psychoses who have record of BP and BMI in the last 12 months (80.28% and 74.40% respectively) |                                                           |
|--------------------------------|-----------------------------------------------------------------------------------------------------------------------------------------------------------------------------------------------------------------------------------------------------------------------------------------------------------|--------------------|--------------------------------------|----------------------------------------------------------------------------------------------------------------------------------------------------------------------------------------------------------------------------------------------------------------------|-----------------------------------------------------------|
|                                | Variable                                                                                                                                                                                                                                                                                                  | Population         | Eligible <sup>1</sup> (% population) |                                                                                                                                                                                                                                                                      | Achieved <sup>4</sup> 4 of the 6 blood tests (% eligible) |
| <b>Group: Mental health</b>    |                                                                                                                                                                                                                                                                                                           |                    |                                      |                                                                                                                                                                                                                                                                      |                                                           |
| <b>Sentence Status</b>         |                                                                                                                                                                                                                                                                                                           |                    |                                      |                                                                                                                                                                                                                                                                      |                                                           |
| 2017/18                        | .                                                                                                                                                                                                                                                                                                         | 81                 | <10 <sup>6</sup>                     | <10 <sup>6</sup>                                                                                                                                                                                                                                                     |                                                           |
|                                | Absconded                                                                                                                                                                                                                                                                                                 | <10 <sup>6</sup>   | <10 <sup>6</sup>                     | <10 <sup>6</sup>                                                                                                                                                                                                                                                     |                                                           |
|                                | Active In                                                                                                                                                                                                                                                                                                 | 15,872             | 187 (1.2)                            | 75 (40.1)                                                                                                                                                                                                                                                            |                                                           |
|                                | Active Out                                                                                                                                                                                                                                                                                                | 1,052              | 13 (1.2)                             | <10 <sup>6</sup>                                                                                                                                                                                                                                                     |                                                           |
|                                | Convicted Sentence                                                                                                                                                                                                                                                                                        | 2,125              | 22 (1.0)                             | <10 <sup>6</sup>                                                                                                                                                                                                                                                     |                                                           |
|                                | Downgrade in security category                                                                                                                                                                                                                                                                            | <10 <sup>6</sup>   | <10 <sup>6</sup>                     | <10 <sup>6</sup>                                                                                                                                                                                                                                                     |                                                           |
|                                | Internal Cell Move                                                                                                                                                                                                                                                                                        | <10 <sup>6</sup>   | <10 <sup>6</sup>                     | <10 <sup>6</sup>                                                                                                                                                                                                                                                     |                                                           |
|                                | Judges Remand                                                                                                                                                                                                                                                                                             | 92                 | <10 <sup>6</sup>                     | <10 <sup>6</sup>                                                                                                                                                                                                                                                     |                                                           |
|                                | Licence Revoke                                                                                                                                                                                                                                                                                            | 52                 | <10 <sup>6</sup>                     | <10 <sup>6</sup>                                                                                                                                                                                                                                                     |                                                           |
|                                | On Remand                                                                                                                                                                                                                                                                                                 | 1,492              | 15 (1.0)                             | <10 <sup>6</sup>                                                                                                                                                                                                                                                     |                                                           |
|                                | Transfer                                                                                                                                                                                                                                                                                                  | 910                | <10 <sup>6</sup>                     | <10 <sup>6</sup>                                                                                                                                                                                                                                                     |                                                           |
|                                | Upgrade in security category                                                                                                                                                                                                                                                                              | <10 <sup>6</sup>   | <10 <sup>6</sup>                     | <10 <sup>6</sup>                                                                                                                                                                                                                                                     |                                                           |
|                                | 2018/19                                                                                                                                                                                                                                                                                                   | .                  | 88                                   | <10 <sup>6</sup>                                                                                                                                                                                                                                                     | <10 <sup>6</sup>                                          |
|                                |                                                                                                                                                                                                                                                                                                           | Absconded          | <10 <sup>6</sup>                     | <10 <sup>6</sup>                                                                                                                                                                                                                                                     | <10 <sup>6</sup>                                          |
|                                |                                                                                                                                                                                                                                                                                                           | Active In          | 18,145                               | 266 (1.5)                                                                                                                                                                                                                                                            | 39 (14.7)                                                 |
|                                |                                                                                                                                                                                                                                                                                                           | Active Out         | 835                                  | 12 (1.4)                                                                                                                                                                                                                                                             | <10 <sup>6</sup>                                          |
|                                |                                                                                                                                                                                                                                                                                                           | Convicted Sentence | 1,320                                | 24 (1.8)                                                                                                                                                                                                                                                             | <10 <sup>6</sup>                                          |
| Downgrade in security category |                                                                                                                                                                                                                                                                                                           | <10 <sup>6</sup>   | <10 <sup>6</sup>                     | <10 <sup>6</sup>                                                                                                                                                                                                                                                     |                                                           |
| Internal Cell Move             |                                                                                                                                                                                                                                                                                                           | <10 <sup>6</sup>   | <10 <sup>6</sup>                     | <10 <sup>6</sup>                                                                                                                                                                                                                                                     |                                                           |
| Judges Remand                  |                                                                                                                                                                                                                                                                                                           | <10 <sup>6</sup>   | <10 <sup>6</sup>                     | <10 <sup>6</sup>                                                                                                                                                                                                                                                     |                                                           |
| Licence Revoke                 |                                                                                                                                                                                                                                                                                                           | 125                | <10 <sup>6</sup>                     | <10 <sup>6</sup>                                                                                                                                                                                                                                                     |                                                           |
| On Remand                      |                                                                                                                                                                                                                                                                                                           | 1,059              | 23 (2.2)                             | <10 <sup>6</sup>                                                                                                                                                                                                                                                     |                                                           |
| Transfer                       |                                                                                                                                                                                                                                                                                                           | 518                | <10 <sup>6</sup>                     | <10 <sup>6</sup>                                                                                                                                                                                                                                                     |                                                           |
| Upgrade in security category   |                                                                                                                                                                                                                                                                                                           | <10 <sup>6</sup>   | <10 <sup>6</sup>                     | <10 <sup>6</sup>                                                                                                                                                                                                                                                     |                                                           |
| 2019/20                        |                                                                                                                                                                                                                                                                                                           | .                  | 69                                   | <10 <sup>6</sup>                                                                                                                                                                                                                                                     | <10 <sup>6</sup>                                          |
|                                |                                                                                                                                                                                                                                                                                                           | Absconded          | <10 <sup>6</sup>                     | <10 <sup>6</sup>                                                                                                                                                                                                                                                     | <10 <sup>6</sup>                                          |
|                                |                                                                                                                                                                                                                                                                                                           | Active In          | 22,424                               | 411 (1.8)                                                                                                                                                                                                                                                            | 22 (5.4)                                                  |
|                                |                                                                                                                                                                                                                                                                                                           | Active Out         | 625                                  | 10 (1.6)                                                                                                                                                                                                                                                             | <10 <sup>6</sup>                                          |
|                                |                                                                                                                                                                                                                                                                                                           | Convicted Sentence | 1,361                                | 13 (1.0)                                                                                                                                                                                                                                                             | <10 <sup>6</sup>                                          |
|                                | Downgrade in security category                                                                                                                                                                                                                                                                            | <10 <sup>6</sup>   | <10 <sup>6</sup>                     | <10 <sup>6</sup>                                                                                                                                                                                                                                                     |                                                           |
|                                | Internal Cell Move                                                                                                                                                                                                                                                                                        | <10 <sup>6</sup>   | <10 <sup>6</sup>                     | <10 <sup>6</sup>                                                                                                                                                                                                                                                     |                                                           |
|                                | Judges Remand                                                                                                                                                                                                                                                                                             | 19                 | <10 <sup>6</sup>                     | <10 <sup>6</sup>                                                                                                                                                                                                                                                     |                                                           |
|                                | Licence Revoke                                                                                                                                                                                                                                                                                            | 178                | <10 <sup>6</sup>                     | <10 <sup>6</sup>                                                                                                                                                                                                                                                     |                                                           |
|                                | On Remand                                                                                                                                                                                                                                                                                                 | 1,031              | 23 (2.2)                             | <10 <sup>6</sup>                                                                                                                                                                                                                                                     |                                                           |
|                                | Transfer                                                                                                                                                                                                                                                                                                  | 101                | <10 <sup>6</sup>                     | <10 <sup>6</sup>                                                                                                                                                                                                                                                     |                                                           |
|                                | Upgrade in security category                                                                                                                                                                                                                                                                              | <10 <sup>6</sup>   | <10 <sup>6</sup>                     | <10 <sup>6</sup>                                                                                                                                                                                                                                                     |                                                           |
|                                | <b>Age - years</b>                                                                                                                                                                                                                                                                                        |                    |                                      |                                                                                                                                                                                                                                                                      |                                                           |
|                                | 2017/18                                                                                                                                                                                                                                                                                                   | 10 - <20           | 468                                  | <10 <sup>6</sup>                                                                                                                                                                                                                                                     | <10 <sup>6</sup>                                          |
|                                |                                                                                                                                                                                                                                                                                                           | 20 - <30           | 6,994                                | 37 (0.5)                                                                                                                                                                                                                                                             | 10 (27.0)                                                 |
|                                |                                                                                                                                                                                                                                                                                                           | 30 - <40           | 7,051                                | 94 (1.3)                                                                                                                                                                                                                                                             | 32 (34.0)                                                 |
|                                |                                                                                                                                                                                                                                                                                                           | 40 - <50           | 4,114                                | 60 (1.5)                                                                                                                                                                                                                                                             | 22 (36.7)                                                 |
| 50 - <60                       |                                                                                                                                                                                                                                                                                                           | 2,107              | 35 (1.7)                             | 19 (54.3)                                                                                                                                                                                                                                                            |                                                           |
| 60 - <70                       |                                                                                                                                                                                                                                                                                                           | 684                | <10 <sup>6</sup>                     | <10 <sup>6</sup>                                                                                                                                                                                                                                                     |                                                           |
| 70 - <80                       |                                                                                                                                                                                                                                                                                                           | 213                | <10 <sup>6</sup>                     | <10 <sup>6</sup>                                                                                                                                                                                                                                                     |                                                           |
| 80 - <90                       |                                                                                                                                                                                                                                                                                                           | 40                 | <10 <sup>6</sup>                     | <10 <sup>6</sup>                                                                                                                                                                                                                                                     |                                                           |
| 90 - <100                      |                                                                                                                                                                                                                                                                                                           | <10 <sup>6</sup>   | <10 <sup>6</sup>                     | <10 <sup>6</sup>                                                                                                                                                                                                                                                     |                                                           |
| 100 - <110                     |                                                                                                                                                                                                                                                                                                           | <10 <sup>6</sup>   | <10 <sup>6</sup>                     | <10 <sup>6</sup>                                                                                                                                                                                                                                                     |                                                           |
| 2018/19                        |                                                                                                                                                                                                                                                                                                           | 10 - <20           | 436                                  | <10 <sup>6</sup>                                                                                                                                                                                                                                                     | <10 <sup>6</sup>                                          |
|                                | 20 - <30                                                                                                                                                                                                                                                                                                  | 7,163              | 68 (0.9)                             | <10 <sup>6</sup>                                                                                                                                                                                                                                                     |                                                           |
|                                | 30 - <40                                                                                                                                                                                                                                                                                                  | 7,381              | 124 (1.7)                            | 17 (13.7)                                                                                                                                                                                                                                                            |                                                           |
|                                | 40 - <50                                                                                                                                                                                                                                                                                                  | 4,180              | 85 (2.0)                             | 12 (14.1)                                                                                                                                                                                                                                                            |                                                           |
|                                | 50 - <60                                                                                                                                                                                                                                                                                                  | 1,978              | 31 (1.6)                             | <10 <sup>6</sup>                                                                                                                                                                                                                                                     |                                                           |
|                                | 60 - <70                                                                                                                                                                                                                                                                                                  | 701                | <10 <sup>6</sup>                     | <10 <sup>6</sup>                                                                                                                                                                                                                                                     |                                                           |
|                                | 70 - <80                                                                                                                                                                                                                                                                                                  | 209                | <10 <sup>6</sup>                     | <10 <sup>6</sup>                                                                                                                                                                                                                                                     |                                                           |
|                                | 80 - <90                                                                                                                                                                                                                                                                                                  | 45                 | <10 <sup>6</sup>                     | <10 <sup>6</sup>                                                                                                                                                                                                                                                     |                                                           |
|                                | 90 - <100                                                                                                                                                                                                                                                                                                 | <10 <sup>6</sup>   | <10 <sup>6</sup>                     | <10 <sup>6</sup>                                                                                                                                                                                                                                                     |                                                           |
|                                | 100 - <110                                                                                                                                                                                                                                                                                                | <10 <sup>6</sup>   | <10 <sup>6</sup>                     | <10 <sup>6</sup>                                                                                                                                                                                                                                                     |                                                           |
|                                | 2019/20                                                                                                                                                                                                                                                                                                   | 10 - <20           | 404                                  | <10 <sup>6</sup>                                                                                                                                                                                                                                                     | <10 <sup>6</sup>                                          |
| 20 - <30                       |                                                                                                                                                                                                                                                                                                           | 8,064              | 92 (1.1)                             | <10 <sup>6</sup>                                                                                                                                                                                                                                                     |                                                           |
| 30 - <40                       |                                                                                                                                                                                                                                                                                                           | 9,125              | 188 (2.1)                            | <10 <sup>6</sup>                                                                                                                                                                                                                                                     |                                                           |
| 40 - <50                       |                                                                                                                                                                                                                                                                                                           | 4,948              | 130 (2.6)                            | <10 <sup>6</sup>                                                                                                                                                                                                                                                     |                                                           |
| 50 - <60                       |                                                                                                                                                                                                                                                                                                           | 2,224              | 35 (1.6)                             | <10 <sup>6</sup>                                                                                                                                                                                                                                                     |                                                           |
| 60 - <70                       |                                                                                                                                                                                                                                                                                                           | 751                | <10 <sup>6</sup>                     | <10 <sup>6</sup>                                                                                                                                                                                                                                                     |                                                           |
| 70 - <80                       |                                                                                                                                                                                                                                                                                                           | 238                | <10 <sup>6</sup>                     | <10 <sup>6</sup>                                                                                                                                                                                                                                                     |                                                           |
| 80 - <90                       |                                                                                                                                                                                                                                                                                                           | 53                 | <10 <sup>6</sup>                     | <10 <sup>6</sup>                                                                                                                                                                                                                                                     |                                                           |
| 90 - <100                      |                                                                                                                                                                                                                                                                                                           | <10 <sup>6</sup>   | <10 <sup>6</sup>                     | <10 <sup>6</sup>                                                                                                                                                                                                                                                     |                                                           |
| 100 - <110                     |                                                                                                                                                                                                                                                                                                           | <10 <sup>6</sup>   | <10 <sup>6</sup>                     | <10 <sup>6</sup>                                                                                                                                                                                                                                                     |                                                           |

<sup>1</sup>Eligible for indicator; <sup>2</sup>Achieve in current prison; <sup>3</sup>Achieve in previous prison; <sup>4</sup>Overall achievement - either current or previous prison; <sup>5</sup>Declined indicator; <sup>6</sup>Suppressed (<10) to avoid disclosure

| Indicator                      | The proportion of people who have received three or more prescriptions for an antipsychotic in the preceding 12 months, and who have a record of blood testing (fasting glucose, HbA1c, lipid profile, urea and electrolytes, full blood count, liver function tests), body mass index and blood pressure |            |                                      | Community achievement 2019/20 (%): No direct comparison in QOF - just percentage of patients with MH diagnosis of schizophrenia, bipolar affective disorder and other psychoses who have record of BP and BMI in the last 12 months (80.28% and 74.40% respectively) |
|--------------------------------|-----------------------------------------------------------------------------------------------------------------------------------------------------------------------------------------------------------------------------------------------------------------------------------------------------------|------------|--------------------------------------|----------------------------------------------------------------------------------------------------------------------------------------------------------------------------------------------------------------------------------------------------------------------|
|                                | Variable                                                                                                                                                                                                                                                                                                  | Population | Eligible <sup>1</sup> (% population) |                                                                                                                                                                                                                                                                      |
| <b>Group: Mental health</b>    |                                                                                                                                                                                                                                                                                                           |            |                                      |                                                                                                                                                                                                                                                                      |
| <b>Length of Stay (months)</b> |                                                                                                                                                                                                                                                                                                           |            |                                      |                                                                                                                                                                                                                                                                      |
| 2017/18                        | <1                                                                                                                                                                                                                                                                                                        | 4,474      | 19 (0.4)                             | <10 <sup>6</sup>                                                                                                                                                                                                                                                     |
|                                | 1-<6                                                                                                                                                                                                                                                                                                      | 8,075      | 65 (0.8)                             | 16 (24.6)                                                                                                                                                                                                                                                            |
|                                | 6-<12                                                                                                                                                                                                                                                                                                     | 3,672      | 51 (1.4)                             | 18 (35.3)                                                                                                                                                                                                                                                            |
|                                | 12-<24                                                                                                                                                                                                                                                                                                    | 2,832      | 48 (1.7)                             | 16 (33.3)                                                                                                                                                                                                                                                            |
|                                | 24+                                                                                                                                                                                                                                                                                                       | 2,624      | 61 (2.3)                             | 37 (60.7)                                                                                                                                                                                                                                                            |
| 2018/19                        | <1                                                                                                                                                                                                                                                                                                        | 4,801      | 49 (1.0)                             | <10 <sup>6</sup>                                                                                                                                                                                                                                                     |
|                                | 1-<6                                                                                                                                                                                                                                                                                                      | 7,742      | 106 (1.4)                            | <10 <sup>6</sup>                                                                                                                                                                                                                                                     |
|                                | 6-<12                                                                                                                                                                                                                                                                                                     | 3,616      | 54 (1.5)                             | <10 <sup>6</sup>                                                                                                                                                                                                                                                     |
|                                | 12-<24                                                                                                                                                                                                                                                                                                    | 3,447      | 57 (1.7)                             | 10 (17.5)                                                                                                                                                                                                                                                            |
|                                | 24+                                                                                                                                                                                                                                                                                                       | 2,493      | 60 (2.4)                             | 19 (31.7)                                                                                                                                                                                                                                                            |
| 2019/20                        | <1                                                                                                                                                                                                                                                                                                        | 5,745      | 70 (1.2)                             | <10 <sup>6</sup>                                                                                                                                                                                                                                                     |
|                                | 1-<6                                                                                                                                                                                                                                                                                                      | 9,697      | 177 (1.8)                            | <10 <sup>6</sup>                                                                                                                                                                                                                                                     |
|                                | 6-<12                                                                                                                                                                                                                                                                                                     | 5,090      | 120 (2.4)                            | <10 <sup>6</sup>                                                                                                                                                                                                                                                     |
|                                | 12-<24                                                                                                                                                                                                                                                                                                    | 3,244      | 52 (1.6)                             | <10 <sup>6</sup>                                                                                                                                                                                                                                                     |
|                                | 24+                                                                                                                                                                                                                                                                                                       | 2,035      | 44 (2.2)                             | 11 (25.0)                                                                                                                                                                                                                                                            |
| <b>Ethnic Group</b>            |                                                                                                                                                                                                                                                                                                           |            |                                      |                                                                                                                                                                                                                                                                      |
| 2017/18                        | White                                                                                                                                                                                                                                                                                                     | 15,638     | 192 (1.2)                            | 64 (33.3)                                                                                                                                                                                                                                                            |
|                                | Mixed                                                                                                                                                                                                                                                                                                     | 431        | <10 <sup>6</sup>                     | <10 <sup>6</sup>                                                                                                                                                                                                                                                     |
|                                | Asian or Asian British                                                                                                                                                                                                                                                                                    | 813        | <10 <sup>6</sup>                     | <10 <sup>6</sup>                                                                                                                                                                                                                                                     |
|                                | Black or Black British                                                                                                                                                                                                                                                                                    | 404        | <10 <sup>6</sup>                     | <10 <sup>6</sup>                                                                                                                                                                                                                                                     |
|                                | Chinese and Other                                                                                                                                                                                                                                                                                         | 214        | <10 <sup>6</sup>                     | <10 <sup>6</sup>                                                                                                                                                                                                                                                     |
|                                | Unclassified                                                                                                                                                                                                                                                                                              | 372        | <10 <sup>6</sup>                     | <10 <sup>6</sup>                                                                                                                                                                                                                                                     |
| 2018/19                        | White                                                                                                                                                                                                                                                                                                     | 14,911     | 266 (1.8)                            | 35 (13.2)                                                                                                                                                                                                                                                            |
|                                | Mixed                                                                                                                                                                                                                                                                                                     | 371        | <10 <sup>6</sup>                     | <10 <sup>6</sup>                                                                                                                                                                                                                                                     |
|                                | Asian or Asian British                                                                                                                                                                                                                                                                                    | 726        | <10 <sup>6</sup>                     | <10 <sup>6</sup>                                                                                                                                                                                                                                                     |
|                                | Black or Black British                                                                                                                                                                                                                                                                                    | 364        | <10 <sup>6</sup>                     | <10 <sup>6</sup>                                                                                                                                                                                                                                                     |
|                                | Chinese and Other                                                                                                                                                                                                                                                                                         | 167        | <10 <sup>6</sup>                     | <10 <sup>6</sup>                                                                                                                                                                                                                                                     |
|                                | Unclassified                                                                                                                                                                                                                                                                                              | 409        | <10 <sup>6</sup>                     | <10 <sup>6</sup>                                                                                                                                                                                                                                                     |
| 2019/20                        | White                                                                                                                                                                                                                                                                                                     | 16,606     | 364 (2.2)                            | 19 (5.2)                                                                                                                                                                                                                                                             |
|                                | Mixed                                                                                                                                                                                                                                                                                                     | 409        | <10 <sup>6</sup>                     | <10 <sup>6</sup>                                                                                                                                                                                                                                                     |
|                                | Asian or Asian British                                                                                                                                                                                                                                                                                    | 755        | <10 <sup>6</sup>                     | <10 <sup>6</sup>                                                                                                                                                                                                                                                     |
|                                | Black or Black British                                                                                                                                                                                                                                                                                    | 451        | <10 <sup>6</sup>                     | <10 <sup>6</sup>                                                                                                                                                                                                                                                     |
|                                | Chinese and Other                                                                                                                                                                                                                                                                                         | 163        | <10 <sup>6</sup>                     | <10 <sup>6</sup>                                                                                                                                                                                                                                                     |
|                                | Unclassified                                                                                                                                                                                                                                                                                              | 387        | 11 (2.8)                             | <10 <sup>6</sup>                                                                                                                                                                                                                                                     |

<sup>1</sup>Eligible for indicator; <sup>2</sup>Achieve in current prison; <sup>3</sup>Achieve in previous prison; <sup>4</sup>Overall achievement - either current or previous prison; <sup>5</sup>Declined indicator; <sup>6</sup>Suppressed (<10) to avoid disclosure

| Indicator              | The proportion of the prison population prescribed three or more psychotropic drugs (antipsychotics, sedative anti-depressants, hypnotics and anxiolytics, pregabalin or gabapentin, opioids) at the same time during an eight-week period |                                          |                                            |                                          |                                          |                                            |                                          | Community achievement 2019/20 (%): No comparable data in QOF 2019/20 |
|------------------------|--------------------------------------------------------------------------------------------------------------------------------------------------------------------------------------------------------------------------------------------|------------------------------------------|--------------------------------------------|------------------------------------------|------------------------------------------|--------------------------------------------|------------------------------------------|----------------------------------------------------------------------|
|                        | Group: Mental health                                                                                                                                                                                                                       |                                          |                                            |                                          |                                          |                                            |                                          |                                                                      |
| Variable               | Population                                                                                                                                                                                                                                 | Satisfy 3 or more <sup>2</sup> (% popln) | Elsewhere 3 or more <sup>3</sup> (% popln) | Achieve 3 or more <sup>4</sup> (% popln) | Satisfy 4 or more <sup>2</sup> (% popln) | Elsewhere 4 or more <sup>3</sup> (% popln) | Achieve 4 or more <sup>4</sup> (% popln) |                                                                      |
| <b>Year</b>            |                                                                                                                                                                                                                                            |                                          |                                            |                                          |                                          |                                            |                                          |                                                                      |
| 2017/18                | 21,677                                                                                                                                                                                                                                     | 97 (0.4)                                 | 17 (0.1)                                   | 114 (0.5)                                | 33 (0.2)                                 | <10 <sup>6</sup>                           | 39 (0.2)                                 |                                                                      |
| 2018/19                | 22,099                                                                                                                                                                                                                                     | 145 (0.7)                                | 13 (0.1)                                   | 158 (0.7)                                | 53 (0.2)                                 | <10 <sup>6</sup>                           | 58 (0.3)                                 |                                                                      |
| 2019/20                | 25,811                                                                                                                                                                                                                                     | 196 (0.8)                                | 21 (0.1)                                   | 216 (0.8)                                | 97 (0.4)                                 | <10 <sup>6</sup>                           | 103 (0.4)                                |                                                                      |
| <b>Prison</b>          |                                                                                                                                                                                                                                            |                                          |                                            |                                          |                                          |                                            |                                          |                                                                      |
| 2017/18                |                                                                                                                                                                                                                                            |                                          |                                            |                                          |                                          |                                            |                                          |                                                                      |
| Prison 1               | 1,323                                                                                                                                                                                                                                      | <10 <sup>6</sup>                         | <10 <sup>6</sup>                           | <10 <sup>6</sup>                         | <10 <sup>6</sup>                         | <10 <sup>6</sup>                           | 1 (0.1)                                  |                                                                      |
| Prison 2               | 3,261                                                                                                                                                                                                                                      | 43 (1.3)                                 | <10 <sup>6</sup>                           | 45 (1.4)                                 | 16 (0.5)                                 | <10 <sup>6</sup>                           | 18 (0.6)                                 |                                                                      |
| Prison 3               | 2,623                                                                                                                                                                                                                                      | <10 <sup>6</sup>                         | <10 <sup>6</sup>                           | 16 (0.6)                                 | <10 <sup>6</sup>                         | <10 <sup>6</sup>                           | 3 (0.1)                                  |                                                                      |
| Prison 4               | 2,089                                                                                                                                                                                                                                      | <10 <sup>6</sup>                         | <10 <sup>6</sup>                           | <10 <sup>6</sup>                         | <10 <sup>6</sup>                         | <10 <sup>6</sup>                           | 1 (0.0)                                  |                                                                      |
| Prison 5               | 637                                                                                                                                                                                                                                        | <10 <sup>6</sup>                         | <10 <sup>6</sup>                           | <10 <sup>6</sup>                         | <10 <sup>6</sup>                         | <10 <sup>6</sup>                           | 0 (0.0)                                  |                                                                      |
| Prison 6               | 1,552                                                                                                                                                                                                                                      | <10 <sup>6</sup>                         | <10 <sup>6</sup>                           | <10 <sup>6</sup>                         | <10 <sup>6</sup>                         | <10 <sup>6</sup>                           | 0 (0.0)                                  |                                                                      |
| Prison 7               | 635                                                                                                                                                                                                                                        | <10 <sup>6</sup>                         | <10 <sup>6</sup>                           | <10 <sup>6</sup>                         | <10 <sup>6</sup>                         | <10 <sup>6</sup>                           | 1 (0.2)                                  |                                                                      |
| Prison 8               | 1,085                                                                                                                                                                                                                                      | <10 <sup>6</sup>                         | <10 <sup>6</sup>                           | <10 <sup>6</sup>                         | <10 <sup>6</sup>                         | <10 <sup>6</sup>                           | 4 (0.4)                                  |                                                                      |
| Prison 9               | 981                                                                                                                                                                                                                                        | <10 <sup>6</sup>                         | <10 <sup>6</sup>                           | <10 <sup>6</sup>                         | <10 <sup>6</sup>                         | <10 <sup>6</sup>                           | 1 (0.1)                                  |                                                                      |
| Prison 10              | 2,523                                                                                                                                                                                                                                      | <10 <sup>6</sup>                         | <10 <sup>6</sup>                           | <10 <sup>6</sup>                         | <10 <sup>6</sup>                         | <10 <sup>6</sup>                           | 5 (0.2)                                  |                                                                      |
| Prison 11              | 3,470                                                                                                                                                                                                                                      | <10 <sup>6</sup>                         | <10 <sup>6</sup>                           | <10 <sup>6</sup>                         | <10 <sup>6</sup>                         | <10 <sup>6</sup>                           | 2 (0.1)                                  |                                                                      |
| Prison 12              | 815                                                                                                                                                                                                                                        | <10 <sup>6</sup>                         | <10 <sup>6</sup>                           | <10 <sup>6</sup>                         | <10 <sup>6</sup>                         | <10 <sup>6</sup>                           | 0 (0.0)                                  |                                                                      |
| Prison 13              | 683                                                                                                                                                                                                                                        | 11 (1.6)                                 | <10 <sup>6</sup>                           | 12 (1.8)                                 | <10 <sup>6</sup>                         | <10 <sup>6</sup>                           | 3 (0.4)                                  |                                                                      |
| 2018/19                |                                                                                                                                                                                                                                            |                                          |                                            |                                          |                                          |                                            |                                          |                                                                      |
| Prison 1               | 1,333                                                                                                                                                                                                                                      | <10 <sup>6</sup>                         | <10 <sup>6</sup>                           | <10 <sup>6</sup>                         | <10 <sup>6</sup>                         | <10 <sup>6</sup>                           | 1 (0.1)                                  |                                                                      |
| Prison 2               | 2,705                                                                                                                                                                                                                                      | 46 (1.7)                                 | <10 <sup>6</sup>                           | 46 (1.7)                                 | 20 (0.7)                                 | <10 <sup>6</sup>                           | 20 (0.7)                                 |                                                                      |
| Prison 3               | 2,522                                                                                                                                                                                                                                      | 15 (0.6)                                 | <10 <sup>6</sup>                           | 18 (0.7)                                 | <10 <sup>6</sup>                         | <10 <sup>6</sup>                           | 3 (0.1)                                  |                                                                      |
| Prison 4               | 2,349                                                                                                                                                                                                                                      | 10 (0.4)                                 | <10 <sup>6</sup>                           | 13 (0.6)                                 | <10 <sup>6</sup>                         | <10 <sup>6</sup>                           | 6 (0.3)                                  |                                                                      |
| Prison 5               | 676                                                                                                                                                                                                                                        | <10 <sup>6</sup>                         | <10 <sup>6</sup>                           | <10 <sup>6</sup>                         | <10 <sup>6</sup>                         | <10 <sup>6</sup>                           | 0 (0.0)                                  |                                                                      |
| Prison 6               | 1,513                                                                                                                                                                                                                                      | <10 <sup>6</sup>                         | <10 <sup>6</sup>                           | <10 <sup>6</sup>                         | <10 <sup>6</sup>                         | <10 <sup>6</sup>                           | 0 (0.0)                                  |                                                                      |
| Prison 7               | 654                                                                                                                                                                                                                                        | 15 (2.3)                                 | <10 <sup>6</sup>                           | 15 (2.3)                                 | <10 <sup>6</sup>                         | <10 <sup>6</sup>                           | 4 (0.6)                                  |                                                                      |
| Prison 8               | 1,148                                                                                                                                                                                                                                      | 20 (1.7)                                 | <10 <sup>6</sup>                           | 20 (1.7)                                 | 12 (1.0)                                 | <10 <sup>6</sup>                           | 12 (1.0)                                 |                                                                      |
| Prison 9               | 996                                                                                                                                                                                                                                        | <10 <sup>6</sup>                         | <10 <sup>6</sup>                           | <10 <sup>6</sup>                         | <10 <sup>6</sup>                         | <10 <sup>6</sup>                           | 4 (0.4)                                  |                                                                      |
| Prison 10              | 2,717                                                                                                                                                                                                                                      | <10 <sup>6</sup>                         | <10 <sup>6</sup>                           | <10 <sup>6</sup>                         | <10 <sup>6</sup>                         | <10 <sup>6</sup>                           | 3 (0.1)                                  |                                                                      |
| Prison 11              | 4,020                                                                                                                                                                                                                                      | <10 <sup>6</sup>                         | <10 <sup>6</sup>                           | 13 (0.3)                                 | <10 <sup>6</sup>                         | <10 <sup>6</sup>                           | 3 (0.1)                                  |                                                                      |
| Prison 12              | 792                                                                                                                                                                                                                                        | <10 <sup>6</sup>                         | <10 <sup>6</sup>                           | <10 <sup>6</sup>                         | <10 <sup>6</sup>                         | <10 <sup>6</sup>                           | 0 (0.0)                                  |                                                                      |
| Prison 13              | 674                                                                                                                                                                                                                                        | <10 <sup>6</sup>                         | <10 <sup>6</sup>                           | <10 <sup>6</sup>                         | <10 <sup>6</sup>                         | <10 <sup>6</sup>                           | 2 (0.3)                                  |                                                                      |
| 2019/20                |                                                                                                                                                                                                                                            |                                          |                                            |                                          |                                          |                                            |                                          |                                                                      |
| Prison 1               | 1,410                                                                                                                                                                                                                                      | <10 <sup>6</sup>                         | <10 <sup>6</sup>                           | <10 <sup>6</sup>                         | <10 <sup>6</sup>                         | <10 <sup>6</sup>                           | 2 (0.1)                                  |                                                                      |
| Prison 2               | 2,979                                                                                                                                                                                                                                      | 41 (1.4)                                 | <10 <sup>6</sup>                           | 43 (1.4)                                 | 17 (0.6)                                 | <10 <sup>6</sup>                           | 17 (0.6)                                 |                                                                      |
| Prison 3               | 2,809                                                                                                                                                                                                                                      | <10 <sup>6</sup>                         | <10 <sup>6</sup>                           | 12 (0.4)                                 | <10 <sup>6</sup>                         | <10 <sup>6</sup>                           | 1 (0.0)                                  |                                                                      |
| Prison 4               | 2,651                                                                                                                                                                                                                                      | 17 (0.6)                                 | <10 <sup>6</sup>                           | 21 (0.8)                                 | <10 <sup>6</sup>                         | <10 <sup>6</sup>                           | 7 (0.3)                                  |                                                                      |
| Prison 5               | 616                                                                                                                                                                                                                                        | <10 <sup>6</sup>                         | <10 <sup>6</sup>                           | <10 <sup>6</sup>                         | <10 <sup>6</sup>                         | <10 <sup>6</sup>                           | 0 (0.0)                                  |                                                                      |
| Prison 6               | 1,533                                                                                                                                                                                                                                      | <10 <sup>6</sup>                         | <10 <sup>6</sup>                           | <10 <sup>6</sup>                         | <10 <sup>6</sup>                         | <10 <sup>6</sup>                           | 1 (0.1)                                  |                                                                      |
| Prison 7               | 860                                                                                                                                                                                                                                        | 11 (1.3)                                 | <10 <sup>6</sup>                           | 12 (1.4)                                 | <10 <sup>6</sup>                         | <10 <sup>6</sup>                           | 3 (0.3)                                  |                                                                      |
| Prison 8               | 1,385                                                                                                                                                                                                                                      | 71 (5.1)                                 | <10 <sup>6</sup>                           | 74 (5.3)                                 | 52 (3.8)                                 | <10 <sup>6</sup>                           | 53 (3.8)                                 |                                                                      |
| Prison 9               | 1,092                                                                                                                                                                                                                                      | <10 <sup>6</sup>                         | <10 <sup>6</sup>                           | <10 <sup>6</sup>                         | <10 <sup>6</sup>                         | <10 <sup>6</sup>                           | 1 (0.1)                                  |                                                                      |
| Prison 10              | 3,577                                                                                                                                                                                                                                      | <10 <sup>6</sup>                         | <10 <sup>6</sup>                           | <10 <sup>6</sup>                         | <10 <sup>6</sup>                         | <10 <sup>6</sup>                           | 6 (0.2)                                  |                                                                      |
| Prison 11              | 5,348                                                                                                                                                                                                                                      | 22 (0.4)                                 | <10 <sup>6</sup>                           | 24 (0.4)                                 | 12 (0.2)                                 | <10 <sup>6</sup>                           | 12 (0.2)                                 |                                                                      |
| Prison 12              | 805                                                                                                                                                                                                                                        | <10 <sup>6</sup>                         | <10 <sup>6</sup>                           | <10 <sup>6</sup>                         | <10 <sup>6</sup>                         | <10 <sup>6</sup>                           | 0 (0.0)                                  |                                                                      |
| Prison 13              | 746                                                                                                                                                                                                                                        | <10 <sup>6</sup>                         | <10 <sup>6</sup>                           | <10 <sup>6</sup>                         | <10 <sup>6</sup>                         | <10 <sup>6</sup>                           | 0 (0.0)                                  |                                                                      |
| <b>Prison category</b> |                                                                                                                                                                                                                                            |                                          |                                            |                                          |                                          |                                            |                                          |                                                                      |
| 2017/18                |                                                                                                                                                                                                                                            |                                          |                                            |                                          |                                          |                                            |                                          |                                                                      |
| A                      | 1,664                                                                                                                                                                                                                                      | 15 (0.9)                                 | <10 <sup>6</sup>                           | 17 (1.0)                                 | <10 <sup>6</sup>                         | <10 <sup>6</sup>                           | <10 <sup>6</sup>                         |                                                                      |
| B                      | 9,254                                                                                                                                                                                                                                      | 50 (0.5)                                 | <10 <sup>6</sup>                           | 55 (0.6)                                 | 21 (0.2)                                 | <10 <sup>6</sup>                           | 25 (0.3)                                 |                                                                      |
| C                      | 6,035                                                                                                                                                                                                                                      | 19 (0.3)                                 | <10 <sup>6</sup>                           | 27 (0.4)                                 | <10 <sup>6</sup>                         | <10 <sup>6</sup>                           | <10 <sup>6</sup>                         |                                                                      |
| Closed                 | 1,720                                                                                                                                                                                                                                      | 10 (0.6)                                 | <10 <sup>6</sup>                           | 12 (0.7)                                 | <10 <sup>6</sup>                         | <10 <sup>6</sup>                           | <10 <sup>6</sup>                         |                                                                      |
| D                      | 2,189                                                                                                                                                                                                                                      | <10 <sup>6</sup>                         | <10 <sup>6</sup>                           | <10 <sup>6</sup>                         | <10 <sup>6</sup>                         | <10 <sup>6</sup>                           | <10 <sup>6</sup>                         |                                                                      |
| YOI                    | 815                                                                                                                                                                                                                                        | <10 <sup>6</sup>                         | <10 <sup>6</sup>                           | <10 <sup>6</sup>                         | <10 <sup>6</sup>                         | <10 <sup>6</sup>                           | <10 <sup>6</sup>                         |                                                                      |
| 2018/19                |                                                                                                                                                                                                                                            |                                          |                                            |                                          |                                          |                                            |                                          |                                                                      |
| A                      | 1,670                                                                                                                                                                                                                                      | 10 (0.6)                                 | <10 <sup>6</sup>                           | 12 (0.7)                                 | <10 <sup>6</sup>                         | <10 <sup>6</sup>                           | <10 <sup>6</sup>                         |                                                                      |
| B                      | 9,442                                                                                                                                                                                                                                      | 65 (0.7)                                 | <10 <sup>6</sup>                           | 68 (0.7)                                 | 25 (0.3)                                 | <10 <sup>6</sup>                           | 26 (0.3)                                 |                                                                      |
| C                      | 6,204                                                                                                                                                                                                                                      | 31 (0.5)                                 | <10 <sup>6</sup>                           | 37 (0.6)                                 | <10 <sup>6</sup>                         | <10 <sup>6</sup>                           | 10 (0.2)                                 |                                                                      |
| Closed                 | 1,802                                                                                                                                                                                                                                      | 35 (1.9)                                 | <10 <sup>6</sup>                           | 35 (1.9)                                 | 16 (0.9)                                 | <10 <sup>6</sup>                           | 16 (0.9)                                 |                                                                      |
| D                      | 2,189                                                                                                                                                                                                                                      | <10 <sup>6</sup>                         | <10 <sup>6</sup>                           | <10 <sup>6</sup>                         | <10 <sup>6</sup>                         | <10 <sup>6</sup>                           | <10 <sup>6</sup>                         |                                                                      |
| YOI                    | 792                                                                                                                                                                                                                                        | <10 <sup>6</sup>                         | <10 <sup>6</sup>                           | <10 <sup>6</sup>                         | <10 <sup>6</sup>                         | <10 <sup>6</sup>                           | <10 <sup>6</sup>                         |                                                                      |
| 2019/20                |                                                                                                                                                                                                                                            |                                          |                                            |                                          |                                          |                                            |                                          |                                                                      |
| A                      | 1,838                                                                                                                                                                                                                                      | <10 <sup>6</sup>                         | <10 <sup>6</sup>                           | <10 <sup>6</sup>                         | <10 <sup>6</sup>                         | <10 <sup>6</sup>                           | <10 <sup>6</sup>                         |                                                                      |
| B                      | 11,904                                                                                                                                                                                                                                     | 71 (0.6)                                 | <10 <sup>6</sup>                           | 76 (0.6)                                 | 34 (0.3)                                 | <10 <sup>6</sup>                           | 35 (0.3)                                 |                                                                      |
| C                      | 6,870                                                                                                                                                                                                                                      | 29 (0.4)                                 | 11 (0.2)                                   | 40 (0.6)                                 | <10 <sup>6</sup>                         | <10 <sup>6</sup>                           | 10 (0.1)                                 |                                                                      |
| Closed                 | 2,245                                                                                                                                                                                                                                      | 82 (3.7)                                 | <10 <sup>6</sup>                           | 86 (3.8)                                 | 55 (2.4)                                 | <10 <sup>6</sup>                           | 56 (2.5)                                 |                                                                      |
| D                      | 2,149                                                                                                                                                                                                                                      | <10 <sup>6</sup>                         | <10 <sup>6</sup>                           | <10 <sup>6</sup>                         | <10 <sup>6</sup>                         | <10 <sup>6</sup>                           | <10 <sup>6</sup>                         |                                                                      |
| YOI                    | 805                                                                                                                                                                                                                                        | <10 <sup>6</sup>                         | <10 <sup>6</sup>                           | <10 <sup>6</sup>                         | <10 <sup>6</sup>                         | <10 <sup>6</sup>                           | <10 <sup>6</sup>                         |                                                                      |
| <b>Gender</b>          |                                                                                                                                                                                                                                            |                                          |                                            |                                          |                                          |                                            |                                          |                                                                      |
| 2017/18                |                                                                                                                                                                                                                                            |                                          |                                            |                                          |                                          |                                            |                                          |                                                                      |
| F                      | 1,699                                                                                                                                                                                                                                      | 10 (0.6)                                 | <10 <sup>6</sup>                           | 12 (0.7)                                 | <10 <sup>6</sup>                         | <10 <sup>6</sup>                           | <10 <sup>6</sup>                         |                                                                      |
| M                      | 19,977                                                                                                                                                                                                                                     | 87 (0.4)                                 | 15 (0.1)                                   | 102 (0.5)                                | 28 (0.1)                                 | <10 <sup>6</sup>                           | 34 (0.2)                                 |                                                                      |
| 2018/19                |                                                                                                                                                                                                                                            |                                          |                                            |                                          |                                          |                                            |                                          |                                                                      |
| F                      | 1,802                                                                                                                                                                                                                                      | 35 (1.9)                                 | <10 <sup>6</sup>                           | 35 (1.9)                                 | 16 (0.9)                                 | <10 <sup>6</sup>                           | 16 (0.9)                                 |                                                                      |
| M                      | 20,295                                                                                                                                                                                                                                     | 110 (0.5)                                | 13 (0.1)                                   | 123 (0.6)                                | 37 (0.2)                                 | <10 <sup>6</sup>                           | 42 (0.2)                                 |                                                                      |
| 2019/20                |                                                                                                                                                                                                                                            |                                          |                                            |                                          |                                          |                                            |                                          |                                                                      |
| F                      | 1,376                                                                                                                                                                                                                                      | 71 (5.2)                                 | <10 <sup>6</sup>                           | 74 (5.4)                                 | 52 (3.8)                                 | <10 <sup>6</sup>                           | 53 (3.9)                                 |                                                                      |
| M                      | 23,570                                                                                                                                                                                                                                     | 114 (0.5)                                | 16 (0.1)                                   | 130 (0.6)                                | 42 (0.2)                                 | <10 <sup>6</sup>                           | 47 (0.2)                                 |                                                                      |

<sup>1</sup>Eligible for indicator; <sup>2</sup>Achieve in current prison; <sup>3</sup>Achieve in previous prison; <sup>4</sup>Overall achievement - either current or previous prison; <sup>5</sup>Declined indicator; <sup>6</sup>Suppressed (<10) to avoid disclosure

| Indicator                      | The proportion of the prison population prescribed three or more psychotropic drugs (antipsychotics, sedative anti-depressants, hypnotics and anxiolytics, pregabalin or gabapentin, opioids) at the same time during an eight-week period |                                          |                                            |                                          |                                          |                                            |                                          | Community achievement 2019/20 (%): No comparable data in QOF 2019/20 |
|--------------------------------|--------------------------------------------------------------------------------------------------------------------------------------------------------------------------------------------------------------------------------------------|------------------------------------------|--------------------------------------------|------------------------------------------|------------------------------------------|--------------------------------------------|------------------------------------------|----------------------------------------------------------------------|
|                                | Group: Mental health                                                                                                                                                                                                                       |                                          |                                            |                                          |                                          |                                            |                                          |                                                                      |
| Variable                       | Population                                                                                                                                                                                                                                 | Satisfy 3 or more <sup>2</sup> (% popln) | Elsewhere 3 or more <sup>3</sup> (% popln) | Achieve 3 or more <sup>4</sup> (% popln) | Satisfy 4 or more <sup>2</sup> (% popln) | Elsewhere 4 or more <sup>3</sup> (% popln) | Achieve 4 or more <sup>4</sup> (% popln) |                                                                      |
| <b>Sentence Status</b>         |                                                                                                                                                                                                                                            |                                          |                                            |                                          |                                          |                                            |                                          |                                                                      |
| 2017/18                        | 81                                                                                                                                                                                                                                         | <10 <sup>6</sup>                         | <10 <sup>6</sup>                           | <10 <sup>6</sup>                         | <10 <sup>6</sup>                         | <10 <sup>6</sup>                           | <10 <sup>6</sup>                         | <10 <sup>6</sup>                                                     |
| Absconded                      | <10 <sup>6</sup>                                                                                                                                                                                                                           | <10 <sup>6</sup>                         | <10 <sup>6</sup>                           | <10 <sup>6</sup>                         | <10 <sup>6</sup>                         | <10 <sup>6</sup>                           | <10 <sup>6</sup>                         | <10 <sup>6</sup>                                                     |
| Active In                      | 15,872                                                                                                                                                                                                                                     | 60 (0.4)                                 | 15 (0.1)                                   | 75 (0.5)                                 | 17 (0.1)                                 | <10 <sup>6</sup>                           | 21 (0.1)                                 |                                                                      |
| Active Out                     | 1,052                                                                                                                                                                                                                                      | <10 <sup>6</sup>                         | <10 <sup>6</sup>                           | <10 <sup>6</sup>                         | <10 <sup>6</sup>                         | <10 <sup>6</sup>                           | <10 <sup>6</sup>                         |                                                                      |
| Convicted Sentence             | 2,125                                                                                                                                                                                                                                      | 12 (0.6)                                 | <10 <sup>6</sup>                           | 14 (0.7)                                 | <10 <sup>6</sup>                         | <10 <sup>6</sup>                           | <10 <sup>6</sup>                         |                                                                      |
| Downgrade in security category | <10 <sup>6</sup>                                                                                                                                                                                                                           | <10 <sup>6</sup>                         | <10 <sup>6</sup>                           | <10 <sup>6</sup>                         | <10 <sup>6</sup>                         | <10 <sup>6</sup>                           | <10 <sup>6</sup>                         |                                                                      |
| Internal Cell Move             | <10 <sup>6</sup>                                                                                                                                                                                                                           | <10 <sup>6</sup>                         | <10 <sup>6</sup>                           | <10 <sup>6</sup>                         | <10 <sup>6</sup>                         | <10 <sup>6</sup>                           | <10 <sup>6</sup>                         |                                                                      |
| Judges Remand                  | 92                                                                                                                                                                                                                                         | <10 <sup>6</sup>                         | <10 <sup>6</sup>                           | <10 <sup>6</sup>                         | <10 <sup>6</sup>                         | <10 <sup>6</sup>                           | <10 <sup>6</sup>                         |                                                                      |
| Licence Revoke                 | 52                                                                                                                                                                                                                                         | <10 <sup>6</sup>                         | <10 <sup>6</sup>                           | <10 <sup>6</sup>                         | <10 <sup>6</sup>                         | <10 <sup>6</sup>                           | <10 <sup>6</sup>                         |                                                                      |
| On Remand                      | 1,492                                                                                                                                                                                                                                      | 21 (1.4)                                 | <10 <sup>6</sup>                           | 21 (1.4)                                 | <10 <sup>6</sup>                         | <10 <sup>6</sup>                           | <10 <sup>6</sup>                         |                                                                      |
| Transfer                       | 910                                                                                                                                                                                                                                        | <10 <sup>6</sup>                         | <10 <sup>6</sup>                           | <10 <sup>6</sup>                         | <10 <sup>6</sup>                         | <10 <sup>6</sup>                           | <10 <sup>6</sup>                         |                                                                      |
| Upgrade in security category   | <10 <sup>6</sup>                                                                                                                                                                                                                           | <10 <sup>6</sup>                         | <10 <sup>6</sup>                           | <10 <sup>6</sup>                         | <10 <sup>6</sup>                         | <10 <sup>6</sup>                           | <10 <sup>6</sup>                         |                                                                      |
| 2018/19                        | 88                                                                                                                                                                                                                                         | <10 <sup>6</sup>                         | <10 <sup>6</sup>                           | <10 <sup>6</sup>                         | <10 <sup>6</sup>                         | <10 <sup>6</sup>                           | <10 <sup>6</sup>                         |                                                                      |
| Absconded                      | <10 <sup>6</sup>                                                                                                                                                                                                                           | <10 <sup>6</sup>                         | <10 <sup>6</sup>                           | <10 <sup>6</sup>                         | <10 <sup>6</sup>                         | <10 <sup>6</sup>                           | <10 <sup>6</sup>                         |                                                                      |
| Active In                      | 18,145                                                                                                                                                                                                                                     | 103 (0.6)                                | 13 (0.1)                                   | 116 (0.6)                                | 35 (0.2)                                 | <10 <sup>6</sup>                           | 40 (0.2)                                 |                                                                      |
| Active Out                     | 835                                                                                                                                                                                                                                        | <10 <sup>6</sup>                         | <10 <sup>6</sup>                           | <10 <sup>6</sup>                         | <10 <sup>6</sup>                         | <10 <sup>6</sup>                           | <10 <sup>6</sup>                         |                                                                      |
| Convicted Sentence             | 1,320                                                                                                                                                                                                                                      | 25 (1.9)                                 | <10 <sup>6</sup>                           | 25 (1.9)                                 | <10 <sup>6</sup>                         | <10 <sup>6</sup>                           | <10 <sup>6</sup>                         |                                                                      |
| Downgrade in security category | <10 <sup>6</sup>                                                                                                                                                                                                                           | <10 <sup>6</sup>                         | <10 <sup>6</sup>                           | <10 <sup>6</sup>                         | <10 <sup>6</sup>                         | <10 <sup>6</sup>                           | <10 <sup>6</sup>                         |                                                                      |
| Internal Cell Move             | <10 <sup>6</sup>                                                                                                                                                                                                                           | <10 <sup>6</sup>                         | <10 <sup>6</sup>                           | <10 <sup>6</sup>                         | <10 <sup>6</sup>                         | <10 <sup>6</sup>                           | <10 <sup>6</sup>                         |                                                                      |
| Judges Remand                  | <10 <sup>6</sup>                                                                                                                                                                                                                           | <10 <sup>6</sup>                         | <10 <sup>6</sup>                           | <10 <sup>6</sup>                         | <10 <sup>6</sup>                         | <10 <sup>6</sup>                           | <10 <sup>6</sup>                         |                                                                      |
| Licence Revoke                 | 125                                                                                                                                                                                                                                        | <10 <sup>6</sup>                         | <10 <sup>6</sup>                           | <10 <sup>6</sup>                         | <10 <sup>6</sup>                         | <10 <sup>6</sup>                           | <10 <sup>6</sup>                         |                                                                      |
| On Remand                      | 1,059                                                                                                                                                                                                                                      | 12 (1.1)                                 | <10 <sup>6</sup>                           | 12 (1.1)                                 | <10 <sup>6</sup>                         | <10 <sup>6</sup>                           | <10 <sup>6</sup>                         |                                                                      |
| Transfer                       | 518                                                                                                                                                                                                                                        | <10 <sup>6</sup>                         | <10 <sup>6</sup>                           | <10 <sup>6</sup>                         | <10 <sup>6</sup>                         | <10 <sup>6</sup>                           | <10 <sup>6</sup>                         |                                                                      |
| Upgrade in security category   | <10 <sup>6</sup>                                                                                                                                                                                                                           | <10 <sup>6</sup>                         | <10 <sup>6</sup>                           | <10 <sup>6</sup>                         | <10 <sup>6</sup>                         | <10 <sup>6</sup>                           | <10 <sup>6</sup>                         |                                                                      |
| 2019/20                        | 69                                                                                                                                                                                                                                         | <10 <sup>6</sup>                         | <10 <sup>6</sup>                           | <10 <sup>6</sup>                         | <10 <sup>6</sup>                         | <10 <sup>6</sup>                           | <10 <sup>6</sup>                         |                                                                      |
| Absconded                      | <10 <sup>6</sup>                                                                                                                                                                                                                           | <10 <sup>6</sup>                         | <10 <sup>6</sup>                           | <10 <sup>6</sup>                         | <10 <sup>6</sup>                         | <10 <sup>6</sup>                           | <10 <sup>6</sup>                         |                                                                      |
| Active In                      | 22,424                                                                                                                                                                                                                                     | 162 (0.7)                                | 20 (0.1)                                   | 181 (0.8)                                | 82 (0.4)                                 | <10 <sup>6</sup>                           | 88 (0.4)                                 |                                                                      |
| Active Out                     | 625                                                                                                                                                                                                                                        | <10 <sup>6</sup>                         | <10 <sup>6</sup>                           | <10 <sup>6</sup>                         | <10 <sup>6</sup>                         | <10 <sup>6</sup>                           | <10 <sup>6</sup>                         |                                                                      |
| Convicted Sentence             | 1,361                                                                                                                                                                                                                                      | 23 (1.7)                                 | <10 <sup>6</sup>                           | 23 (1.7)                                 | <10 <sup>6</sup>                         | <10 <sup>6</sup>                           | <10 <sup>6</sup>                         |                                                                      |
| Downgrade in security category | <10 <sup>6</sup>                                                                                                                                                                                                                           | <10 <sup>6</sup>                         | <10 <sup>6</sup>                           | <10 <sup>6</sup>                         | <10 <sup>6</sup>                         | <10 <sup>6</sup>                           | <10 <sup>6</sup>                         |                                                                      |
| Internal Cell Move             | <10 <sup>6</sup>                                                                                                                                                                                                                           | <10 <sup>6</sup>                         | <10 <sup>6</sup>                           | <10 <sup>6</sup>                         | <10 <sup>6</sup>                         | <10 <sup>6</sup>                           | <10 <sup>6</sup>                         |                                                                      |
| Judges Remand                  | 19                                                                                                                                                                                                                                         | <10 <sup>6</sup>                         | <10 <sup>6</sup>                           | <10 <sup>6</sup>                         | <10 <sup>6</sup>                         | <10 <sup>6</sup>                           | <10 <sup>6</sup>                         |                                                                      |
| Licence Revoke                 | 178                                                                                                                                                                                                                                        | <10 <sup>6</sup>                         | <10 <sup>6</sup>                           | <10 <sup>6</sup>                         | <10 <sup>6</sup>                         | <10 <sup>6</sup>                           | <10 <sup>6</sup>                         |                                                                      |
| Transfer                       | 101                                                                                                                                                                                                                                        | <10 <sup>6</sup>                         | <10 <sup>6</sup>                           | <10 <sup>6</sup>                         | <10 <sup>6</sup>                         | <10 <sup>6</sup>                           | <10 <sup>6</sup>                         |                                                                      |
| Upgrade in security category   | <10 <sup>6</sup>                                                                                                                                                                                                                           | <10 <sup>6</sup>                         | <10 <sup>6</sup>                           | <10 <sup>6</sup>                         | <10 <sup>6</sup>                         | <10 <sup>6</sup>                           | <10 <sup>6</sup>                         |                                                                      |
| <b>Age - years</b>             |                                                                                                                                                                                                                                            |                                          |                                            |                                          |                                          |                                            |                                          |                                                                      |
| 2017/18                        | 10 - <20                                                                                                                                                                                                                                   | 468                                      | <10 <sup>6</sup>                           | <10 <sup>6</sup>                         | <10 <sup>6</sup>                         | <10 <sup>6</sup>                           | <10 <sup>6</sup>                         | <10 <sup>6</sup>                                                     |
|                                | 20 - <30                                                                                                                                                                                                                                   | 6,994                                    | <10 <sup>6</sup>                           | <10 <sup>6</sup>                         | 10 (0.1)                                 | <10 <sup>6</sup>                           | <10 <sup>6</sup>                         | <10 <sup>6</sup>                                                     |
|                                | 30 - <40                                                                                                                                                                                                                                   | 7,051                                    | 28 (0.4)                                   | <10 <sup>6</sup>                         | 37 (0.5)                                 | <10 <sup>6</sup>                           | <10 <sup>6</sup>                         | 11 (0.2)                                                             |
|                                | 40 - <50                                                                                                                                                                                                                                   | 4,114                                    | 33 (0.8)                                   | <10 <sup>6</sup>                         | 38 (0.9)                                 | 13 (0.3)                                   | <10 <sup>6</sup>                         | 16 (0.4)                                                             |
|                                | 50 - <60                                                                                                                                                                                                                                   | 2,107                                    | 20 (0.9)                                   | <10 <sup>6</sup>                         | 22 (1.0)                                 | <10 <sup>6</sup>                           | <10 <sup>6</sup>                         | <10 <sup>6</sup>                                                     |
|                                | 60 - <70                                                                                                                                                                                                                                   | 684                                      | <10 <sup>6</sup>                           | <10 <sup>6</sup>                         | <10 <sup>6</sup>                         | <10 <sup>6</sup>                           | <10 <sup>6</sup>                         | <10 <sup>6</sup>                                                     |
|                                | 70 - <80                                                                                                                                                                                                                                   | 213                                      | <10 <sup>6</sup>                           | <10 <sup>6</sup>                         | <10 <sup>6</sup>                         | <10 <sup>6</sup>                           | <10 <sup>6</sup>                         | <10 <sup>6</sup>                                                     |
|                                | 80 - <90                                                                                                                                                                                                                                   | 40                                       | <10 <sup>6</sup>                           | <10 <sup>6</sup>                         | <10 <sup>6</sup>                         | <10 <sup>6</sup>                           | <10 <sup>6</sup>                         | <10 <sup>6</sup>                                                     |
|                                | 90 - <100                                                                                                                                                                                                                                  | <10 <sup>6</sup>                         | <10 <sup>6</sup>                           | <10 <sup>6</sup>                         | <10 <sup>6</sup>                         | <10 <sup>6</sup>                           | <10 <sup>6</sup>                         | <10 <sup>6</sup>                                                     |
|                                | 100 - <110                                                                                                                                                                                                                                 | <10 <sup>6</sup>                         | <10 <sup>6</sup>                           | <10 <sup>6</sup>                         | <10 <sup>6</sup>                         | <10 <sup>6</sup>                           | <10 <sup>6</sup>                         | <10 <sup>6</sup>                                                     |
| 2018/19                        | 10 - <20                                                                                                                                                                                                                                   | 436                                      | <10 <sup>6</sup>                           | <10 <sup>6</sup>                         | <10 <sup>6</sup>                         | <10 <sup>6</sup>                           | <10 <sup>6</sup>                         | <10 <sup>6</sup>                                                     |
|                                | 20 - <30                                                                                                                                                                                                                                   | 7,163                                    | 25 (0.3)                                   | <10 <sup>6</sup>                         | 29 (0.4)                                 | <10 <sup>6</sup>                           | <10 <sup>6</sup>                         | 10 (0.1)                                                             |
|                                | 30 - <40                                                                                                                                                                                                                                   | 7,381                                    | 53 (0.7)                                   | <10 <sup>6</sup>                         | 57 (0.8)                                 | 20 (0.3)                                   | <10 <sup>6</sup>                         | 23 (0.3)                                                             |
|                                | 40 - <50                                                                                                                                                                                                                                   | 4,180                                    | 41 (1.0)                                   | <10 <sup>6</sup>                         | 43 (1.0)                                 | 17 (0.4)                                   | <10 <sup>6</sup>                         | 17 (0.4)                                                             |
|                                | 50 - <60                                                                                                                                                                                                                                   | 1,978                                    | 14 (0.7)                                   | <10 <sup>6</sup>                         | 17 (0.9)                                 | <10 <sup>6</sup>                           | <10 <sup>6</sup>                         | <10 <sup>6</sup>                                                     |
|                                | 60 - <70                                                                                                                                                                                                                                   | 701                                      | <10 <sup>6</sup>                           | <10 <sup>6</sup>                         | <10 <sup>6</sup>                         | <10 <sup>6</sup>                           | <10 <sup>6</sup>                         | <10 <sup>6</sup>                                                     |
|                                | 70 - <80                                                                                                                                                                                                                                   | 209                                      | <10 <sup>6</sup>                           | <10 <sup>6</sup>                         | <10 <sup>6</sup>                         | <10 <sup>6</sup>                           | <10 <sup>6</sup>                         | <10 <sup>6</sup>                                                     |
|                                | 80 - <90                                                                                                                                                                                                                                   | 45                                       | <10 <sup>6</sup>                           | <10 <sup>6</sup>                         | <10 <sup>6</sup>                         | <10 <sup>6</sup>                           | <10 <sup>6</sup>                         | <10 <sup>6</sup>                                                     |
|                                | 90 - <100                                                                                                                                                                                                                                  | <10 <sup>6</sup>                         | <10 <sup>6</sup>                           | <10 <sup>6</sup>                         | <10 <sup>6</sup>                         | <10 <sup>6</sup>                           | <10 <sup>6</sup>                         | <10 <sup>6</sup>                                                     |
|                                | 100 - <110                                                                                                                                                                                                                                 | <10 <sup>6</sup>                         | <10 <sup>6</sup>                           | <10 <sup>6</sup>                         | <10 <sup>6</sup>                         | <10 <sup>6</sup>                           | <10 <sup>6</sup>                         | <10 <sup>6</sup>                                                     |
| 2019/20                        | 10 - <20                                                                                                                                                                                                                                   | 404                                      | <10 <sup>6</sup>                           | <10 <sup>6</sup>                         | <10 <sup>6</sup>                         | <10 <sup>6</sup>                           | <10 <sup>6</sup>                         | <10 <sup>6</sup>                                                     |
|                                | 20 - <30                                                                                                                                                                                                                                   | 8,064                                    | 29 (0.4)                                   | <10 <sup>6</sup>                         | 34 (0.4)                                 | 16 (0.2)                                   | <10 <sup>6</sup>                         | 17 (0.2)                                                             |
|                                | 30 - <40                                                                                                                                                                                                                                   | 9,125                                    | 90 (1.0)                                   | <10 <sup>6</sup>                         | 101 (1.1)                                | 44 (0.5)                                   | <10 <sup>6</sup>                         | 47 (0.5)                                                             |
|                                | 40 - <50                                                                                                                                                                                                                                   | 4,948                                    | 58 (1.2)                                   | <10 <sup>6</sup>                         | 61 (1.2)                                 | 31 (0.6)                                   | <10 <sup>6</sup>                         | 33 (0.7)                                                             |
|                                | 50 - <60                                                                                                                                                                                                                                   | 2,224                                    | 19 (0.9)                                   | <10 <sup>6</sup>                         | 20 (0.9)                                 | <10 <sup>6</sup>                           | <10 <sup>6</sup>                         | <10 <sup>6</sup>                                                     |
|                                | 60 - <70                                                                                                                                                                                                                                   | 751                                      | <10 <sup>6</sup>                           | <10 <sup>6</sup>                         | <10 <sup>6</sup>                         | <10 <sup>6</sup>                           | <10 <sup>6</sup>                         | <10 <sup>6</sup>                                                     |
|                                | 70 - <80                                                                                                                                                                                                                                   | 238                                      | <10 <sup>6</sup>                           | <10 <sup>6</sup>                         | <10 <sup>6</sup>                         | <10 <sup>6</sup>                           | <10 <sup>6</sup>                         | <10 <sup>6</sup>                                                     |
|                                | 80 - <90                                                                                                                                                                                                                                   | 53                                       | <10 <sup>6</sup>                           | <10 <sup>6</sup>                         | <10 <sup>6</sup>                         | <10 <sup>6</sup>                           | <10 <sup>6</sup>                         | <10 <sup>6</sup>                                                     |
|                                | 90 - <100                                                                                                                                                                                                                                  | <10 <sup>6</sup>                         | <10 <sup>6</sup>                           | <10 <sup>6</sup>                         | <10 <sup>6</sup>                         | <10 <sup>6</sup>                           | <10 <sup>6</sup>                         | <10 <sup>6</sup>                                                     |
|                                | 100 - <110                                                                                                                                                                                                                                 | <10 <sup>6</sup>                         | <10 <sup>6</sup>                           | <10 <sup>6</sup>                         | <10 <sup>6</sup>                         | <10 <sup>6</sup>                           | <10 <sup>6</sup>                         | <10 <sup>6</sup>                                                     |

<sup>1</sup>Eligible for indicator; <sup>2</sup>Achieve in current prison; <sup>3</sup>Achieve in previous prison; <sup>4</sup>Overall achievement - either current or previous prison; <sup>5</sup>Declined indicator; <sup>6</sup>Suppressed (<10) to avoid disclosure

| Indicator                      |                        | The proportion of the prison population prescribed three or more psychotropic drugs (antipsychotics, sedative anti-depressants, hypnotics and anxiolytics, pregabalin or gabapentin, opioids) at the same time during an eight-week period |                                            |                                          |                                          |                                            |                                          | Community achievement 2019/20 (%): No comparable data in QOF 2019/20 |
|--------------------------------|------------------------|--------------------------------------------------------------------------------------------------------------------------------------------------------------------------------------------------------------------------------------------|--------------------------------------------|------------------------------------------|------------------------------------------|--------------------------------------------|------------------------------------------|----------------------------------------------------------------------|
| Group: Mental health           |                        |                                                                                                                                                                                                                                            |                                            |                                          |                                          |                                            |                                          |                                                                      |
| Variable                       | Population             | Satisfy 3 or more <sup>2</sup> (% popln)                                                                                                                                                                                                   | Elsewhere 3 or more <sup>3</sup> (% popln) | Achieve 3 or more <sup>4</sup> (% popln) | Satisfy 4 or more <sup>2</sup> (% popln) | Elsewhere 4 or more <sup>3</sup> (% popln) | Achieve 4 or more <sup>4</sup> (% popln) |                                                                      |
| <b>Length of Stay (months)</b> |                        |                                                                                                                                                                                                                                            |                                            |                                          |                                          |                                            |                                          |                                                                      |
| 2017/18                        | <1                     | 4,474                                                                                                                                                                                                                                      | <10 <sup>6</sup>                           | <10 <sup>6</sup>                         | 11 (0.2)                                 | <10 <sup>6</sup>                           | <10 <sup>6</sup>                         |                                                                      |
|                                | 1-<6                   | 8,075                                                                                                                                                                                                                                      | 37 (0.5)                                   | <10 <sup>6</sup>                         | 45 (0.6)                                 | 12 (0.1)                                   | 14 (0.2)                                 |                                                                      |
|                                | 6-<12                  | 3,672                                                                                                                                                                                                                                      | 20 (0.5)                                   | <10 <sup>6</sup>                         | 23 (0.6)                                 | <10 <sup>6</sup>                           | <10 <sup>6</sup>                         |                                                                      |
|                                | 12-<24                 | 2,832                                                                                                                                                                                                                                      | 17 (0.6)                                   | <10 <sup>6</sup>                         | 17 (0.6)                                 | <10 <sup>6</sup>                           | <10 <sup>6</sup>                         |                                                                      |
|                                | 24+                    | 2,624                                                                                                                                                                                                                                      | 17 (0.6)                                   | <10 <sup>6</sup>                         | 18 (0.7)                                 | <10 <sup>6</sup>                           | <10 <sup>6</sup>                         |                                                                      |
| 2018/19                        | <1                     | 4,801                                                                                                                                                                                                                                      | 10 (0.2)                                   | <10 <sup>6</sup>                         | 13 (0.3)                                 | <10 <sup>6</sup>                           | <10 <sup>6</sup>                         |                                                                      |
|                                | 1-<6                   | 7,742                                                                                                                                                                                                                                      | 48 (0.6)                                   | <10 <sup>6</sup>                         | 52 (0.7)                                 | 18 (0.2)                                   | 20 (0.3)                                 |                                                                      |
|                                | 6-<12                  | 3,616                                                                                                                                                                                                                                      | 25 (0.7)                                   | <10 <sup>6</sup>                         | 27 (0.7)                                 | 11 (0.3)                                   | 12 (0.3)                                 |                                                                      |
|                                | 12-<24                 | 3,752                                                                                                                                                                                                                                      | 48 (1.3)                                   | <10 <sup>6</sup>                         | 52 (1.4)                                 | 16 (0.4)                                   | 18 (0.5)                                 |                                                                      |
|                                | 24+                    | 2,188                                                                                                                                                                                                                                      | 14 (0.6)                                   | <10 <sup>6</sup>                         | 14 (0.6)                                 | <10 <sup>6</sup>                           | <10 <sup>6</sup>                         |                                                                      |
| 2019/20                        | <1                     | 5,745                                                                                                                                                                                                                                      | 20 (0.3)                                   | <10 <sup>6</sup>                         | 23 (0.4)                                 | <10 <sup>6</sup>                           | 10 (0.2)                                 |                                                                      |
|                                | 1-<6                   | 9,697                                                                                                                                                                                                                                      | 61 (0.6)                                   | 14 (0.1)                                 | 75 (0.8)                                 | 31 (0.3)                                   | 35 (0.4)                                 |                                                                      |
|                                | 6-<12                  | 5,090                                                                                                                                                                                                                                      | 62 (1.2)                                   | <10 <sup>6</sup>                         | 64 (1.3)                                 | 31 (0.6)                                   | 32 (0.6)                                 |                                                                      |
|                                | 12-<24                 | 3,244                                                                                                                                                                                                                                      | 38 (1.2)                                   | <10 <sup>6</sup>                         | 38 (1.2)                                 | 19 (0.6)                                   | 19 (0.6)                                 |                                                                      |
|                                | 24+                    | 2,035                                                                                                                                                                                                                                      | 15 (0.7)                                   | <10 <sup>6</sup>                         | 16 (0.8)                                 | <10 <sup>6</sup>                           | <10 <sup>6</sup>                         |                                                                      |
| <b>Ethnic Group</b>            |                        |                                                                                                                                                                                                                                            |                                            |                                          |                                          |                                            |                                          |                                                                      |
| 2017/18                        | White                  | 15,638                                                                                                                                                                                                                                     | 83 (0.5)                                   | 16 (0.1)                                 | 99 (0.6)                                 | 29 (0.2)                                   | <10 <sup>6</sup>                         |                                                                      |
|                                | Mixed                  | 431                                                                                                                                                                                                                                        | <10 <sup>6</sup>                           | <10 <sup>6</sup>                         | <10 <sup>6</sup>                         | <10 <sup>6</sup>                           | <10 <sup>6</sup>                         |                                                                      |
|                                | Asian or Asian British | 813                                                                                                                                                                                                                                        | <10 <sup>6</sup>                           | <10 <sup>6</sup>                         | <10 <sup>6</sup>                         | <10 <sup>6</sup>                           | <10 <sup>6</sup>                         |                                                                      |
|                                | Black or Black British | 404                                                                                                                                                                                                                                        | <10 <sup>6</sup>                           | <10 <sup>6</sup>                         | <10 <sup>6</sup>                         | <10 <sup>6</sup>                           | <10 <sup>6</sup>                         |                                                                      |
|                                | Chinese and Other      | 214                                                                                                                                                                                                                                        | <10 <sup>6</sup>                           | <10 <sup>6</sup>                         | <10 <sup>6</sup>                         | <10 <sup>6</sup>                           | <10 <sup>6</sup>                         |                                                                      |
|                                | Unclassified           | 372                                                                                                                                                                                                                                        | <10 <sup>6</sup>                           | <10 <sup>6</sup>                         | <10 <sup>6</sup>                         | <10 <sup>6</sup>                           | <10 <sup>6</sup>                         |                                                                      |
| 2018/19                        | White                  | 14,911                                                                                                                                                                                                                                     | 122 (0.8)                                  | 11 (0.1)                                 | 133 (0.9)                                | 46 (0.3)                                   | 50 (0.3)                                 |                                                                      |
|                                | Mixed                  | 371                                                                                                                                                                                                                                        | <10 <sup>6</sup>                           | <10 <sup>6</sup>                         | <10 <sup>6</sup>                         | <10 <sup>6</sup>                           | <10 <sup>6</sup>                         |                                                                      |
|                                | Asian or Asian British | 726                                                                                                                                                                                                                                        | <10 <sup>6</sup>                           | <10 <sup>6</sup>                         | <10 <sup>6</sup>                         | <10 <sup>6</sup>                           | <10 <sup>6</sup>                         |                                                                      |
|                                | Black or Black British | 364                                                                                                                                                                                                                                        | <10 <sup>6</sup>                           | <10 <sup>6</sup>                         | <10 <sup>6</sup>                         | <10 <sup>6</sup>                           | <10 <sup>6</sup>                         |                                                                      |
|                                | Chinese and Other      | 167                                                                                                                                                                                                                                        | <10 <sup>6</sup>                           | <10 <sup>6</sup>                         | <10 <sup>6</sup>                         | <10 <sup>6</sup>                           | <10 <sup>6</sup>                         |                                                                      |
|                                | Unclassified           | 409                                                                                                                                                                                                                                        | <10 <sup>6</sup>                           | <10 <sup>6</sup>                         | <10 <sup>6</sup>                         | <10 <sup>6</sup>                           | <10 <sup>6</sup>                         |                                                                      |
| 2019/20                        | White                  | 16,606                                                                                                                                                                                                                                     | 161 (1.0)                                  | 20 (0.1)                                 | 180 (1.1)                                | 82 (0.5)                                   | 87 (0.5)                                 |                                                                      |
|                                | Mixed                  | 409                                                                                                                                                                                                                                        | <10 <sup>6</sup>                           | <10 <sup>6</sup>                         | <10 <sup>6</sup>                         | <10 <sup>6</sup>                           | <10 <sup>6</sup>                         |                                                                      |
|                                | Asian or Asian British | 755                                                                                                                                                                                                                                        | <10 <sup>6</sup>                           | <10 <sup>6</sup>                         | <10 <sup>6</sup>                         | <10 <sup>6</sup>                           | <10 <sup>6</sup>                         |                                                                      |
|                                | Black or Black British | 451                                                                                                                                                                                                                                        | <10 <sup>6</sup>                           | <10 <sup>6</sup>                         | <10 <sup>6</sup>                         | <10 <sup>6</sup>                           | <10 <sup>6</sup>                         |                                                                      |
|                                | Chinese and Other      | 163                                                                                                                                                                                                                                        | <10 <sup>6</sup>                           | <10 <sup>6</sup>                         | <10 <sup>6</sup>                         | <10 <sup>6</sup>                           | <10 <sup>6</sup>                         |                                                                      |
|                                | Unclassified           | 387                                                                                                                                                                                                                                        | <10 <sup>6</sup>                           | <10 <sup>6</sup>                         | <10 <sup>6</sup>                         | <10 <sup>6</sup>                           | <10 <sup>6</sup>                         |                                                                      |

<sup>1</sup>Eligible for indicator; <sup>2</sup>Achieve in current prison; <sup>3</sup>Achieve in previous prison; <sup>4</sup>Overall achievement - either current or previous prison; <sup>5</sup>Declined indicator; <sup>6</sup>Suppressed (<10) to avoid disclosure



| Indicator              | <i>The proportion of people aged over 55 years in the prison population who have a record of one of the following assessments in the preceding 12 months; Mini Mental State Examination, 6 item Cognitive Impairment Test, General practitioner Assessment of Cognition</i> |            |                                 |                                   |                                     |                                   | Community achievement<br>2019/20: no comparable<br>data in QOF 2019/20 |
|------------------------|-----------------------------------------------------------------------------------------------------------------------------------------------------------------------------------------------------------------------------------------------------------------------------|------------|---------------------------------|-----------------------------------|-------------------------------------|-----------------------------------|------------------------------------------------------------------------|
|                        | Group: Mental health                                                                                                                                                                                                                                                        | Population | Eligible <sup>1</sup> (% popln) | Satisfy <sup>2</sup> (% eligible) | Elsewhere <sup>3</sup> (% eligible) | Achieve <sup>4</sup> (% eligible) |                                                                        |
| <b>Year</b>            |                                                                                                                                                                                                                                                                             |            |                                 |                                   |                                     |                                   |                                                                        |
|                        | 2017/18                                                                                                                                                                                                                                                                     | 21,677     | 1,746 (8.1)                     | 23 (1.3)                          | <10 <sup>6</sup>                    | 23 (1.3)                          |                                                                        |
|                        | 2018/19                                                                                                                                                                                                                                                                     | 22,099     | 1,729 (7.8)                     | 125 (7.2)                         | <10 <sup>6</sup>                    | 125 (7.2)                         |                                                                        |
|                        | 2019/20                                                                                                                                                                                                                                                                     | 25,811     | 1,884 (7.3)                     | 370 (19.6)                        | <10 <sup>6</sup>                    | 370 (19.6)                        |                                                                        |
| <b>Prison</b>          |                                                                                                                                                                                                                                                                             |            |                                 |                                   |                                     |                                   |                                                                        |
| 2017/18                | Prison 1                                                                                                                                                                                                                                                                    | 1,323      | 40 (3.0)                        | <10 <sup>6</sup>                  | <10 <sup>6</sup>                    | <10 <sup>6</sup>                  |                                                                        |
|                        | Prison 2                                                                                                                                                                                                                                                                    | 3,261      | 241 (7.4)                       | <10 <sup>6</sup>                  | <10 <sup>6</sup>                    | <10 <sup>6</sup>                  |                                                                        |
|                        | Prison 3                                                                                                                                                                                                                                                                    | 2,623      | 189 (7.2)                       | <10 <sup>6</sup>                  | <10 <sup>6</sup>                    | <10 <sup>6</sup>                  |                                                                        |
|                        | Prison 4                                                                                                                                                                                                                                                                    | 2,089      | 223 (10.7)                      | <10 <sup>6</sup>                  | <10 <sup>6</sup>                    | <10 <sup>6</sup>                  |                                                                        |
|                        | Prison 5                                                                                                                                                                                                                                                                    | 637        | 56 (8.8)                        | <10 <sup>6</sup>                  | <10 <sup>6</sup>                    | <10 <sup>6</sup>                  |                                                                        |
|                        | Prison 6                                                                                                                                                                                                                                                                    | 1,552      | 130 (8.4)                       | <10 <sup>6</sup>                  | <10 <sup>6</sup>                    | <10 <sup>6</sup>                  |                                                                        |
|                        | Prison 7                                                                                                                                                                                                                                                                    | 635        | 40 (6.3)                        | <10 <sup>6</sup>                  | <10 <sup>6</sup>                    | <10 <sup>6</sup>                  |                                                                        |
|                        | Prison 8                                                                                                                                                                                                                                                                    | 1,085      | 70 (6.5)                        | <10 <sup>6</sup>                  | <10 <sup>6</sup>                    | <10 <sup>6</sup>                  |                                                                        |
|                        | Prison 9                                                                                                                                                                                                                                                                    | 981        | 224 (22.8)                      | 17 (7.6)                          | <10 <sup>6</sup>                    | 17 (7.6)                          |                                                                        |
|                        | Prison 10                                                                                                                                                                                                                                                                   | 2,523      | 178 (7.1)                       | <10 <sup>6</sup>                  | <10 <sup>6</sup>                    | <10 <sup>6</sup>                  |                                                                        |
|                        | Prison 11                                                                                                                                                                                                                                                                   | 3,470      | 230 (6.6)                       | <10 <sup>6</sup>                  | <10 <sup>6</sup>                    | <10 <sup>6</sup>                  |                                                                        |
|                        | Prison 12                                                                                                                                                                                                                                                                   | 815        | <10 <sup>6</sup>                | <10 <sup>6</sup>                  | <10 <sup>6</sup>                    | <10 <sup>6</sup>                  |                                                                        |
|                        | Prison 13                                                                                                                                                                                                                                                                   | 683        | 124 (18.2)                      | <10 <sup>6</sup>                  | <10 <sup>6</sup>                    | <10 <sup>6</sup>                  |                                                                        |
| 2018/19                | Prison 1                                                                                                                                                                                                                                                                    | 1,333      | 37 (2.8)                        | <10 <sup>6</sup>                  | <10 <sup>6</sup>                    | <10 <sup>6</sup>                  |                                                                        |
|                        | Prison 2                                                                                                                                                                                                                                                                    | 2,705      | 170 (6.3)                       | 65 (38.2)                         | <10 <sup>6</sup>                    | 65 (38.2)                         |                                                                        |
|                        | Prison 3                                                                                                                                                                                                                                                                    | 2,522      | 163 (6.5)                       | <10 <sup>6</sup>                  | <10 <sup>6</sup>                    | <10 <sup>6</sup>                  |                                                                        |
|                        | Prison 4                                                                                                                                                                                                                                                                    | 2,349      | 240 (10.2)                      | <10 <sup>6</sup>                  | <10 <sup>6</sup>                    | <10 <sup>6</sup>                  |                                                                        |
|                        | Prison 5                                                                                                                                                                                                                                                                    | 676        | 62 (9.2)                        | <10 <sup>6</sup>                  | <10 <sup>6</sup>                    | <10 <sup>6</sup>                  |                                                                        |
|                        | Prison 6                                                                                                                                                                                                                                                                    | 1,513      | 121 (8.0)                       | <10 <sup>6</sup>                  | <10 <sup>6</sup>                    | <10 <sup>6</sup>                  |                                                                        |
|                        | Prison 7                                                                                                                                                                                                                                                                    | 654        | 41 (6.3)                        | <10 <sup>6</sup>                  | <10 <sup>6</sup>                    | <10 <sup>6</sup>                  |                                                                        |
|                        | Prison 8                                                                                                                                                                                                                                                                    | 1,148      | 77 (6.7)                        | <10 <sup>6</sup>                  | <10 <sup>6</sup>                    | <10 <sup>6</sup>                  |                                                                        |
|                        | Prison 9                                                                                                                                                                                                                                                                    | 996        | 239 (24.0)                      | <10 <sup>6</sup>                  | <10 <sup>6</sup>                    | <10 <sup>6</sup>                  |                                                                        |
|                        | Prison 10                                                                                                                                                                                                                                                                   | 2,717      | 189 (7.0)                       | 36 (19.0)                         | <10 <sup>6</sup>                    | 36 (19.0)                         |                                                                        |
|                        | Prison 11                                                                                                                                                                                                                                                                   | 4,020      | 252 (6.3)                       | <10 <sup>6</sup>                  | <10 <sup>6</sup>                    | <10 <sup>6</sup>                  |                                                                        |
|                        | Prison 12                                                                                                                                                                                                                                                                   | 792        | <10 <sup>6</sup>                | <10 <sup>6</sup>                  | <10 <sup>6</sup>                    | <10 <sup>6</sup>                  |                                                                        |
|                        | Prison 13                                                                                                                                                                                                                                                                   | 674        | 138 (20.5)                      | <10 <sup>6</sup>                  | <10 <sup>6</sup>                    | <10 <sup>6</sup>                  |                                                                        |
| 2019/20                | Prison 1                                                                                                                                                                                                                                                                    | 1,410      | 46 (3.3)                        | 21 (45.7)                         | <10 <sup>6</sup>                    | 21 (45.7)                         |                                                                        |
|                        | Prison 2                                                                                                                                                                                                                                                                    | 2,979      | 196 (6.6)                       | 126 (64.3)                        | <10 <sup>6</sup>                    | 126 (64.3)                        |                                                                        |
|                        | Prison 3                                                                                                                                                                                                                                                                    | 2,809      | 172 (6.1)                       | <10 <sup>6</sup>                  | <10 <sup>6</sup>                    | <10 <sup>6</sup>                  |                                                                        |
|                        | Prison 4                                                                                                                                                                                                                                                                    | 2,651      | 270 (10.2)                      | <10 <sup>6</sup>                  | <10 <sup>6</sup>                    | <10 <sup>6</sup>                  |                                                                        |
|                        | Prison 5                                                                                                                                                                                                                                                                    | 616        | 55 (8.9)                        | <10 <sup>6</sup>                  | <10 <sup>6</sup>                    | <10 <sup>6</sup>                  |                                                                        |
|                        | Prison 6                                                                                                                                                                                                                                                                    | 1,533      | 104 (6.8)                       | 64 (61.5)                         | <10 <sup>6</sup>                    | 64 (61.5)                         |                                                                        |
|                        | Prison 7                                                                                                                                                                                                                                                                    | 860        | 60 (7.0)                        | <10 <sup>6</sup>                  | <10 <sup>6</sup>                    | <10 <sup>6</sup>                  |                                                                        |
|                        | Prison 8                                                                                                                                                                                                                                                                    | 1,385      | 84 (6.1)                        | 26 (31.0)                         | <10 <sup>6</sup>                    | 26 (31.0)                         |                                                                        |
|                        | Prison 9                                                                                                                                                                                                                                                                    | 1,092      | 260 (23.8)                      | <10 <sup>6</sup>                  | <10 <sup>6</sup>                    | <10 <sup>6</sup>                  |                                                                        |
|                        | Prison 10                                                                                                                                                                                                                                                                   | 3,577      | 203 (5.7)                       | 118 (58.1)                        | <10 <sup>6</sup>                    | 118 (58.1)                        |                                                                        |
|                        | Prison 11                                                                                                                                                                                                                                                                   | 5,348      | 295 (5.5)                       | <10 <sup>6</sup>                  | <10 <sup>6</sup>                    | <10 <sup>6</sup>                  |                                                                        |
|                        | Prison 12                                                                                                                                                                                                                                                                   | 805        | <10 <sup>6</sup>                | <10 <sup>6</sup>                  | <10 <sup>6</sup>                    | <10 <sup>6</sup>                  |                                                                        |
|                        | Prison 13                                                                                                                                                                                                                                                                   | 746        | 138 (18.5)                      | <10 <sup>6</sup>                  | <10 <sup>6</sup>                    | <10 <sup>6</sup>                  |                                                                        |
| <b>Prison category</b> |                                                                                                                                                                                                                                                                             |            |                                 |                                   |                                     |                                   |                                                                        |
| 2017/18                | A                                                                                                                                                                                                                                                                           | 1,664      | 348 (20.9)                      | 19 (5.5)                          | <10 <sup>6</sup>                    | 19 (5.5)                          |                                                                        |
|                        | B                                                                                                                                                                                                                                                                           | 9,254      | 649 (7.0)                       | <10 <sup>6</sup>                  | <10 <sup>6</sup>                    | <10 <sup>6</sup>                  |                                                                        |
|                        | C                                                                                                                                                                                                                                                                           | 6,035      | 452 (7.5)                       | <10 <sup>6</sup>                  | <10 <sup>6</sup>                    | <10 <sup>6</sup>                  |                                                                        |
|                        | Closed                                                                                                                                                                                                                                                                      | 1,720      | 110 (6.4)                       | <10 <sup>6</sup>                  | <10 <sup>6</sup>                    | <10 <sup>6</sup>                  |                                                                        |
|                        | D                                                                                                                                                                                                                                                                           | 2,189      | 186 (8.5)                       | <10 <sup>6</sup>                  | <10 <sup>6</sup>                    | <10 <sup>6</sup>                  |                                                                        |
|                        | YOI                                                                                                                                                                                                                                                                         | 815        | <10 <sup>6</sup>                | <10 <sup>6</sup>                  | <10 <sup>6</sup>                    | <10 <sup>6</sup>                  |                                                                        |
| 2018/19                | A                                                                                                                                                                                                                                                                           | 1,670      | 377 (22.6)                      | <10 <sup>6</sup>                  | <10 <sup>6</sup>                    | <10 <sup>6</sup>                  |                                                                        |
|                        | B                                                                                                                                                                                                                                                                           | 9,442      | 611 (6.5)                       | 103 (16.9)                        | <10 <sup>6</sup>                    | 103 (16.9)                        |                                                                        |
|                        | C                                                                                                                                                                                                                                                                           | 6,204      | 440 (7.1)                       | <10 <sup>6</sup>                  | <10 <sup>6</sup>                    | <10 <sup>6</sup>                  |                                                                        |
|                        | Closed                                                                                                                                                                                                                                                                      | 1,802      | 118 (6.5)                       | <10 <sup>6</sup>                  | <10 <sup>6</sup>                    | <10 <sup>6</sup>                  |                                                                        |
|                        | D                                                                                                                                                                                                                                                                           | 2,189      | 183 (8.4)                       | <10 <sup>6</sup>                  | <10 <sup>6</sup>                    | <10 <sup>6</sup>                  |                                                                        |
|                        | YOI                                                                                                                                                                                                                                                                         | 792        | <10 <sup>6</sup>                | <10 <sup>6</sup>                  | <10 <sup>6</sup>                    | <10 <sup>6</sup>                  |                                                                        |
| 2019/20                | A                                                                                                                                                                                                                                                                           | 1,838      | 398 (21.7)                      | <10 <sup>6</sup>                  | <10 <sup>6</sup>                    | <10 <sup>6</sup>                  |                                                                        |
|                        | B                                                                                                                                                                                                                                                                           | 11,904     | 694 (5.8)                       | 245 (35.3)                        | <10 <sup>6</sup>                    | 245 (35.3)                        |                                                                        |
|                        | C                                                                                                                                                                                                                                                                           | 6,870      | 488 (7.1)                       | 27 (5.5)                          | <10 <sup>6</sup>                    | 27 (5.5)                          |                                                                        |
|                        | Closed                                                                                                                                                                                                                                                                      | 2,245      | 144 (6.4)                       | 27 (18.8)                         | <10 <sup>6</sup>                    | 27 (18.8)                         |                                                                        |
|                        | D                                                                                                                                                                                                                                                                           | 2,149      | 159 (7.4)                       | 65 (40.9)                         | <10 <sup>6</sup>                    | 65 (40.9)                         |                                                                        |
|                        | YOI                                                                                                                                                                                                                                                                         | 805        | <10 <sup>6</sup>                | <10 <sup>6</sup>                  | <10 <sup>6</sup>                    | <10 <sup>6</sup>                  |                                                                        |
| <b>Gender</b>          |                                                                                                                                                                                                                                                                             |            |                                 |                                   |                                     |                                   |                                                                        |
| 2017/18                | F                                                                                                                                                                                                                                                                           | 1,699      | 109 (6.4)                       | <10 <sup>6</sup>                  | <10 <sup>6</sup>                    | <10 <sup>6</sup>                  |                                                                        |
|                        | M                                                                                                                                                                                                                                                                           | 19,977     | 1,637 (8.2)                     | 23 (1.4)                          | <10 <sup>6</sup>                    | 23 (1.4)                          |                                                                        |
| 2018/19                | F                                                                                                                                                                                                                                                                           | 1,802      | 119 (6.6)                       | <10 <sup>6</sup>                  | <10 <sup>6</sup>                    | <10 <sup>6</sup>                  |                                                                        |
|                        | M                                                                                                                                                                                                                                                                           | 20,295     | 1,610 (7.9)                     | 125 (7.8)                         | <10 <sup>6</sup>                    | 125 (7.8)                         |                                                                        |
| 2019/20                | F                                                                                                                                                                                                                                                                           | 1,376      | 83 (6.0)                        | 26 (31.3)                         | <10 <sup>6</sup>                    | 26 (31.3)                         |                                                                        |
|                        | M                                                                                                                                                                                                                                                                           | 23,570     | 1,741 (7.4)                     | 343 (19.7)                        | <10 <sup>6</sup>                    | 343 (19.7)                        |                                                                        |

<sup>1</sup>Eligible for indicator; <sup>2</sup>Achieve in current prison; <sup>3</sup>Achieve in previous prison; <sup>4</sup>Overall achievement - either current or previous prison; <sup>5</sup>Declined indicator; <sup>6</sup>Suppressed (<10) to avoid disclosure

| Indicator              | The proportion of people aged over 55 years in the prison population who have a record of one of the following assessments in the preceding 12 months; Mini Mental State Examination, 6 item Cognitive Impairment Test, General practitioner Assessment of Cognition |                  |                                 |                                   |                                     | Community achievement<br>2019/20: no comparable<br>data in QOF 2019/20 |
|------------------------|----------------------------------------------------------------------------------------------------------------------------------------------------------------------------------------------------------------------------------------------------------------------|------------------|---------------------------------|-----------------------------------|-------------------------------------|------------------------------------------------------------------------|
|                        | Group: Mental health                                                                                                                                                                                                                                                 | Population       | Eligible <sup>1</sup> (% popln) | Satisfy <sup>2</sup> (% eligible) | Elsewhere <sup>3</sup> (% eligible) |                                                                        |
| <b>Sentence Status</b> |                                                                                                                                                                                                                                                                      |                  |                                 |                                   |                                     |                                                                        |
| 2017/18                | .                                                                                                                                                                                                                                                                    | 81               | 11 (13.6)                       | <10 <sup>6</sup>                  | <10 <sup>6</sup>                    | <10 <sup>6</sup>                                                       |
|                        | Absconded                                                                                                                                                                                                                                                            | <10 <sup>u</sup> | <10 <sup>6</sup>                | <10 <sup>6</sup>                  | <10 <sup>6</sup>                    | <10 <sup>6</sup>                                                       |
|                        | Active In                                                                                                                                                                                                                                                            | 15,872           | 1,316 (8.3)                     | 22 (1.7)                          | <10 <sup>6</sup>                    | 22 (1.7)                                                               |
|                        | Active Out                                                                                                                                                                                                                                                           | 1,052            | 82 (7.8)                        | <10 <sup>6</sup>                  | <10 <sup>6</sup>                    | <10 <sup>6</sup>                                                       |
|                        | Convicted Sentence                                                                                                                                                                                                                                                   | 2,125            | 169 (8.0)                       | <10 <sup>6</sup>                  | <10 <sup>6</sup>                    | <10 <sup>6</sup>                                                       |
|                        | Downgrade in security category                                                                                                                                                                                                                                       | <10 <sup>u</sup> | <10 <sup>6</sup>                | <10 <sup>6</sup>                  | <10 <sup>6</sup>                    | <10 <sup>6</sup>                                                       |
|                        | Internal Cell Move                                                                                                                                                                                                                                                   | <10 <sup>u</sup> | <10 <sup>6</sup>                | <10 <sup>6</sup>                  | <10 <sup>6</sup>                    | <10 <sup>6</sup>                                                       |
|                        | Judges Remand                                                                                                                                                                                                                                                        | 92               | <10 <sup>6</sup>                | <10 <sup>6</sup>                  | <10 <sup>6</sup>                    | <10 <sup>6</sup>                                                       |
|                        | Licence Revoke                                                                                                                                                                                                                                                       | 52               | <10 <sup>6</sup>                | <10 <sup>6</sup>                  | <10 <sup>6</sup>                    | <10 <sup>6</sup>                                                       |
|                        | On Remand                                                                                                                                                                                                                                                            | 1,492            | 86 (5.8)                        | <10 <sup>6</sup>                  | <10 <sup>6</sup>                    | <10 <sup>6</sup>                                                       |
|                        | Transfer                                                                                                                                                                                                                                                             | 910              | 76 (8.4)                        | <10 <sup>6</sup>                  | <10 <sup>6</sup>                    | <10 <sup>6</sup>                                                       |
|                        | Upgrade in security category                                                                                                                                                                                                                                         | <10 <sup>u</sup> | <10 <sup>6</sup>                | <10 <sup>6</sup>                  | <10 <sup>6</sup>                    | <10 <sup>6</sup>                                                       |
| 2018/19                | .                                                                                                                                                                                                                                                                    | 88               | <10 <sup>6</sup>                | <10 <sup>6</sup>                  | <10 <sup>6</sup>                    | <10 <sup>6</sup>                                                       |
|                        | Absconded                                                                                                                                                                                                                                                            | <10 <sup>u</sup> | <10 <sup>6</sup>                | <10 <sup>6</sup>                  | <10 <sup>6</sup>                    | <10 <sup>6</sup>                                                       |
|                        | Active In                                                                                                                                                                                                                                                            | 18,145           | 1,440 (7.9)                     | 74 (5.1)                          | <10 <sup>6</sup>                    | 74 (5.1)                                                               |
|                        | Active Out                                                                                                                                                                                                                                                           | 835              | 72 (8.6)                        | <10 <sup>6</sup>                  | <10 <sup>6</sup>                    | <10 <sup>6</sup>                                                       |
|                        | Convicted Sentence                                                                                                                                                                                                                                                   | 1,320            | 112 (8.5)                       | 30 (26.8)                         | <10 <sup>6</sup>                    | 30 (26.8)                                                              |
|                        | Downgrade in security category                                                                                                                                                                                                                                       | <10 <sup>u</sup> | <10 <sup>6</sup>                | <10 <sup>6</sup>                  | <10 <sup>6</sup>                    | <10 <sup>6</sup>                                                       |
|                        | Internal Cell Move                                                                                                                                                                                                                                                   | <10 <sup>u</sup> | <10 <sup>6</sup>                | <10 <sup>6</sup>                  | <10 <sup>6</sup>                    | <10 <sup>6</sup>                                                       |
|                        | Judges Remand                                                                                                                                                                                                                                                        | <10 <sup>u</sup> | <10 <sup>6</sup>                | <10 <sup>6</sup>                  | <10 <sup>6</sup>                    | <10 <sup>6</sup>                                                       |
|                        | Licence Revoke                                                                                                                                                                                                                                                       | 125              | <10 <sup>6</sup>                | <10 <sup>6</sup>                  | <10 <sup>6</sup>                    | <10 <sup>6</sup>                                                       |
|                        | On Remand                                                                                                                                                                                                                                                            | 1,059            | 53 (5.0)                        | 17 (32.1)                         | <10 <sup>6</sup>                    | 17 (32.1)                                                              |
|                        | Transfer                                                                                                                                                                                                                                                             | 518              | 39 (7.5)                        | <10 <sup>6</sup>                  | <10 <sup>6</sup>                    | <10 <sup>6</sup>                                                       |
|                        | Upgrade in security category                                                                                                                                                                                                                                         | <10 <sup>u</sup> | <10 <sup>6</sup>                | <10 <sup>6</sup>                  | <10 <sup>6</sup>                    | <10 <sup>6</sup>                                                       |
| 2019/20                | .                                                                                                                                                                                                                                                                    | 69               | <10 <sup>6</sup>                | <10 <sup>6</sup>                  | <10 <sup>6</sup>                    | <10 <sup>6</sup>                                                       |
|                        | Absconded                                                                                                                                                                                                                                                            | <10 <sup>u</sup> | <10 <sup>6</sup>                | <10 <sup>6</sup>                  | <10 <sup>6</sup>                    | <10 <sup>6</sup>                                                       |
|                        | Active In                                                                                                                                                                                                                                                            | 22,424           | 1,636 (7.3)                     | 247 (15.1)                        | <10 <sup>6</sup>                    | 247 (15.1)                                                             |
|                        | Active Out                                                                                                                                                                                                                                                           | 625              | 54 (8.6)                        | 18 (33.3)                         | <10 <sup>6</sup>                    | 18 (33.3)                                                              |
|                        | Convicted Sentence                                                                                                                                                                                                                                                   | 1,361            | 109 (8.0)                       | 60 (55.0)                         | <10 <sup>6</sup>                    | 60 (55.0)                                                              |
|                        | Downgrade in security category                                                                                                                                                                                                                                       | <10 <sup>u</sup> | <10 <sup>6</sup>                | <10 <sup>6</sup>                  | <10 <sup>6</sup>                    | <10 <sup>6</sup>                                                       |
|                        | Internal Cell Move                                                                                                                                                                                                                                                   | <10 <sup>u</sup> | <10 <sup>6</sup>                | <10 <sup>6</sup>                  | <10 <sup>6</sup>                    | <10 <sup>6</sup>                                                       |
|                        | Judges Remand                                                                                                                                                                                                                                                        | 19               | <10 <sup>6</sup>                | <10 <sup>6</sup>                  | <10 <sup>6</sup>                    | <10 <sup>6</sup>                                                       |
|                        | Licence Revoke                                                                                                                                                                                                                                                       | 178              | 10 (5.6)                        | <10 <sup>6</sup>                  | <10 <sup>6</sup>                    | <10 <sup>6</sup>                                                       |
|                        | On Remand                                                                                                                                                                                                                                                            | 1,031            | 59 (5.7)                        | 37 (62.7)                         | <10 <sup>6</sup>                    | 37 (62.7)                                                              |
|                        | Transfer                                                                                                                                                                                                                                                             | 101              | <10 <sup>6</sup>                | <10 <sup>6</sup>                  | <10 <sup>6</sup>                    | <10 <sup>6</sup>                                                       |
|                        | Upgrade in security category                                                                                                                                                                                                                                         | <10 <sup>u</sup> | <10 <sup>6</sup>                | <10 <sup>6</sup>                  | <10 <sup>6</sup>                    | <10 <sup>6</sup>                                                       |
| <b>Age - years</b>     |                                                                                                                                                                                                                                                                      |                  |                                 |                                   |                                     |                                                                        |
| 2017/18                | 10 - <20                                                                                                                                                                                                                                                             | 468              | <10 <sup>6</sup>                | <10 <sup>6</sup>                  | <10 <sup>6</sup>                    | <10 <sup>6</sup>                                                       |
|                        | 20 - <30                                                                                                                                                                                                                                                             | 6,994            | <10 <sup>6</sup>                | <10 <sup>6</sup>                  | <10 <sup>6</sup>                    | <10 <sup>6</sup>                                                       |
|                        | 30 - <40                                                                                                                                                                                                                                                             | 7,051            | <10 <sup>6</sup>                | <10 <sup>6</sup>                  | <10 <sup>6</sup>                    | <10 <sup>6</sup>                                                       |
|                        | 40 - <50                                                                                                                                                                                                                                                             | 4,114            | <10 <sup>6</sup>                | <10 <sup>6</sup>                  | <10 <sup>6</sup>                    | <10 <sup>6</sup>                                                       |
|                        | 50 - <60                                                                                                                                                                                                                                                             | 2,107            | 805 (38.2)                      | <10 <sup>6</sup>                  | <10 <sup>6</sup>                    | <10 <sup>6</sup>                                                       |
|                        | 60 - <70                                                                                                                                                                                                                                                             | 684              | 684 (100.0)                     | 14 (2.0)                          | <10 <sup>6</sup>                    | 14 (2.0)                                                               |
|                        | 70 - <80                                                                                                                                                                                                                                                             | 213              | 213 (100.0)                     | <10 <sup>6</sup>                  | <10 <sup>6</sup>                    | <10 <sup>6</sup>                                                       |
|                        | 80 - <90                                                                                                                                                                                                                                                             | 40               | 40 (100.0)                      | <10 <sup>6</sup>                  | <10 <sup>6</sup>                    | <10 <sup>6</sup>                                                       |
|                        | 90 - <100                                                                                                                                                                                                                                                            | <10 <sup>u</sup> | <10 <sup>6</sup>                | <10 <sup>6</sup>                  | <10 <sup>6</sup>                    | <10 <sup>6</sup>                                                       |
|                        | 100 - <110                                                                                                                                                                                                                                                           | <10 <sup>u</sup> | <10 <sup>6</sup>                | <10 <sup>6</sup>                  | <10 <sup>6</sup>                    | <10 <sup>6</sup>                                                       |
| 2018/19                | 10 - <20                                                                                                                                                                                                                                                             | 436              | <10 <sup>6</sup>                | <10 <sup>6</sup>                  | <10 <sup>6</sup>                    | <10 <sup>6</sup>                                                       |
|                        | 20 - <30                                                                                                                                                                                                                                                             | 7,163            | <10 <sup>6</sup>                | <10 <sup>6</sup>                  | <10 <sup>6</sup>                    | <10 <sup>6</sup>                                                       |
|                        | 30 - <40                                                                                                                                                                                                                                                             | 7,381            | <10 <sup>6</sup>                | <10 <sup>6</sup>                  | <10 <sup>6</sup>                    | <10 <sup>6</sup>                                                       |
|                        | 40 - <50                                                                                                                                                                                                                                                             | 4,180            | <10 <sup>6</sup>                | <10 <sup>6</sup>                  | <10 <sup>6</sup>                    | <10 <sup>6</sup>                                                       |
|                        | 50 - <60                                                                                                                                                                                                                                                             | 1,978            | 771 (39.0)                      | 44 (5.7)                          | <10 <sup>6</sup>                    | 44 (5.7)                                                               |
|                        | 60 - <70                                                                                                                                                                                                                                                             | 701              | 701 (100.0)                     | 55 (7.8)                          | <10 <sup>6</sup>                    | 55 (7.8)                                                               |
|                        | 70 - <80                                                                                                                                                                                                                                                             | 209              | 209 (100.0)                     | 19 (9.1)                          | <10 <sup>6</sup>                    | 19 (9.1)                                                               |
|                        | 80 - <90                                                                                                                                                                                                                                                             | 45               | 45 (100.0)                      | <10 <sup>6</sup>                  | <10 <sup>6</sup>                    | <10 <sup>6</sup>                                                       |
|                        | 90 - <100                                                                                                                                                                                                                                                            | <10 <sup>u</sup> | <10 <sup>6</sup>                | <10 <sup>6</sup>                  | <10 <sup>6</sup>                    | <10 <sup>6</sup>                                                       |
|                        | 100 - <110                                                                                                                                                                                                                                                           | <10 <sup>u</sup> | <10 <sup>6</sup>                | <10 <sup>6</sup>                  | <10 <sup>6</sup>                    | <10 <sup>6</sup>                                                       |
| 2019/20                | 10 - <20                                                                                                                                                                                                                                                             | 404              | <10 <sup>6</sup>                | <10 <sup>6</sup>                  | <10 <sup>6</sup>                    | <10 <sup>6</sup>                                                       |
|                        | 20 - <30                                                                                                                                                                                                                                                             | 8,064            | <10 <sup>6</sup>                | <10 <sup>6</sup>                  | <10 <sup>6</sup>                    | <10 <sup>6</sup>                                                       |
|                        | 30 - <40                                                                                                                                                                                                                                                             | 9,125            | <10 <sup>6</sup>                | <10 <sup>6</sup>                  | <10 <sup>6</sup>                    | <10 <sup>6</sup>                                                       |
|                        | 40 - <50                                                                                                                                                                                                                                                             | 4,948            | <10 <sup>6</sup>                | <10 <sup>6</sup>                  | <10 <sup>6</sup>                    | <10 <sup>6</sup>                                                       |
|                        | 50 - <60                                                                                                                                                                                                                                                             | 2,224            | 840 (37.8)                      | 192 (22.9)                        | <10 <sup>6</sup>                    | 192 (22.9)                                                             |
|                        | 60 - <70                                                                                                                                                                                                                                                             | 751              | 751 (100.0)                     | 126 (16.8)                        | <10 <sup>6</sup>                    | 126 (16.8)                                                             |
|                        | 70 - <80                                                                                                                                                                                                                                                             | 238              | 238 (100.0)                     | 41 (17.2)                         | <10 <sup>6</sup>                    | 41 (17.2)                                                              |
|                        | 80 - <90                                                                                                                                                                                                                                                             | 53               | 53 (100.0)                      | 10 (18.9)                         | <10 <sup>6</sup>                    | 10 (18.9)                                                              |
|                        | 90 - <100                                                                                                                                                                                                                                                            | <10 <sup>u</sup> | <10 <sup>6</sup>                | <10 <sup>6</sup>                  | <10 <sup>6</sup>                    | <10 <sup>6</sup>                                                       |
|                        | 100 - <110                                                                                                                                                                                                                                                           | <10 <sup>u</sup> | <10 <sup>6</sup>                | <10 <sup>6</sup>                  | <10 <sup>6</sup>                    | <10 <sup>6</sup>                                                       |

<sup>1</sup>Eligible for indicator; <sup>2</sup>Achieve in current prison; <sup>3</sup>Achieve in previous prison; <sup>4</sup>Overall achievement - either current or previous prison; <sup>5</sup>Declined indicator; <sup>6</sup>Suppressed (<10) to avoid disclosure

| Indicator                      |                        | <i>The proportion of people aged over 55 years in the prison population who have a record of one of the following assessments in the preceding 12 months; Mini Mental State Examination, 6 item Cognitive Impairment Test, General practitioner Assessment of Cognition</i> |                                 |                                   |                                     |                                   | Community achievement<br>2019/20: no comparable<br>data in QOF 2019/20 |
|--------------------------------|------------------------|-----------------------------------------------------------------------------------------------------------------------------------------------------------------------------------------------------------------------------------------------------------------------------|---------------------------------|-----------------------------------|-------------------------------------|-----------------------------------|------------------------------------------------------------------------|
| Group: Mental health           |                        | Population                                                                                                                                                                                                                                                                  | Eligible <sup>1</sup> (% popln) | Satisfy <sup>2</sup> (% eligible) | Elsewhere <sup>3</sup> (% eligible) | Achieve <sup>4</sup> (% eligible) |                                                                        |
| Variable                       |                        |                                                                                                                                                                                                                                                                             |                                 |                                   |                                     |                                   |                                                                        |
| <b>Length of Stay (months)</b> |                        |                                                                                                                                                                                                                                                                             |                                 |                                   |                                     |                                   |                                                                        |
| 2017/18                        | <1                     | 4,474                                                                                                                                                                                                                                                                       | 267 (6.0)                       | <10 <sup>6</sup>                  | <10 <sup>6</sup>                    | <10 <sup>6</sup>                  |                                                                        |
|                                | 1-<6                   | 8,075                                                                                                                                                                                                                                                                       | 424 (5.3)                       | <10 <sup>6</sup>                  | <10 <sup>6</sup>                    | <10 <sup>6</sup>                  |                                                                        |
|                                | 6-<12                  | 3,672                                                                                                                                                                                                                                                                       | 242 (6.6)                       | <10 <sup>6</sup>                  | <10 <sup>6</sup>                    | <10 <sup>6</sup>                  |                                                                        |
|                                | 12-<24                 | 2,832                                                                                                                                                                                                                                                                       | 228 (8.1)                       | <10 <sup>6</sup>                  | <10 <sup>6</sup>                    | <10 <sup>6</sup>                  |                                                                        |
|                                | 24+                    | 2,624                                                                                                                                                                                                                                                                       | 585 (22.3)                      | 19 (3.2)                          | <10 <sup>6</sup>                    | 19 (3.2)                          |                                                                        |
| 2018/19                        | <1                     | 4,801                                                                                                                                                                                                                                                                       | 273 (5.7)                       | 17 (6.2)                          | <10 <sup>6</sup>                    | 17 (6.2)                          |                                                                        |
|                                | 1-<6                   | 7,742                                                                                                                                                                                                                                                                       | 365 (4.7)                       | 34 (9.3)                          | <10 <sup>6</sup>                    | 34 (9.3)                          |                                                                        |
|                                | 6-<12                  | 3,616                                                                                                                                                                                                                                                                       | 217 (6.0)                       | 17 (7.8)                          | <10 <sup>6</sup>                    | 17 (7.8)                          |                                                                        |
|                                | 12-<24                 | 3,447                                                                                                                                                                                                                                                                       | 301 (8.7)                       | 37 (12.3)                         | <10 <sup>6</sup>                    | 37 (12.3)                         |                                                                        |
|                                | 24+                    | 2,493                                                                                                                                                                                                                                                                       | 573 (23.0)                      | 20 (3.5)                          | <10 <sup>6</sup>                    | 20 (3.5)                          |                                                                        |
| 2019/20                        | <1                     | 5,745                                                                                                                                                                                                                                                                       | 333 (5.8)                       | 69 (20.7)                         | <10 <sup>6</sup>                    | 69 (20.7)                         |                                                                        |
|                                | 1-<6                   | 9,697                                                                                                                                                                                                                                                                       | 482 (5.0)                       | 151 (31.3)                        | <10 <sup>6</sup>                    | 151 (31.3)                        |                                                                        |
|                                | 6-<12                  | 5,090                                                                                                                                                                                                                                                                       | 273 (5.4)                       | 79 (28.9)                         | <10 <sup>6</sup>                    | 79 (28.9)                         |                                                                        |
|                                | 12-<24                 | 3,244                                                                                                                                                                                                                                                                       | 293 (9.0)                       | 52 (17.7)                         | <10 <sup>6</sup>                    | 52 (17.7)                         |                                                                        |
|                                | 24+                    | 2,035                                                                                                                                                                                                                                                                       | 503 (24.7)                      | 19 (3.8)                          | <10 <sup>6</sup>                    | 19 (3.8)                          |                                                                        |
| <b>Ethnic Group</b>            |                        |                                                                                                                                                                                                                                                                             |                                 |                                   |                                     |                                   |                                                                        |
| 2017/18                        | White                  | 15,638                                                                                                                                                                                                                                                                      | 1,407 (9.0)                     | 21 (1.5)                          | <10 <sup>6</sup>                    | 21 (1.5)                          |                                                                        |
|                                | Mixed                  | 431                                                                                                                                                                                                                                                                         | 21 (4.9)                        | <10 <sup>6</sup>                  | <10 <sup>6</sup>                    | <10 <sup>6</sup>                  |                                                                        |
|                                | Asian or Asian British | 813                                                                                                                                                                                                                                                                         | 27 (3.3)                        | <10 <sup>6</sup>                  | <10 <sup>6</sup>                    | <10 <sup>6</sup>                  |                                                                        |
|                                | Black or Black British | 404                                                                                                                                                                                                                                                                         | 26 (6.4)                        | <10 <sup>6</sup>                  | <10 <sup>6</sup>                    | <10 <sup>6</sup>                  |                                                                        |
|                                | Chinese and Other      | 214                                                                                                                                                                                                                                                                         | 11 (5.1)                        | <10 <sup>6</sup>                  | <10 <sup>6</sup>                    | <10 <sup>6</sup>                  |                                                                        |
|                                | Unclassified           | 372                                                                                                                                                                                                                                                                         | 33 (8.9)                        | <10 <sup>6</sup>                  | <10 <sup>6</sup>                    | <10 <sup>6</sup>                  |                                                                        |
| 2018/19                        | White                  | 14,911                                                                                                                                                                                                                                                                      | 1,312 (8.8)                     | 114 (8.7)                         | <10 <sup>6</sup>                    | 114 (8.7)                         |                                                                        |
|                                | Mixed                  | 371                                                                                                                                                                                                                                                                         | 24 (6.5)                        | <10 <sup>6</sup>                  | <10 <sup>6</sup>                    | <10 <sup>6</sup>                  |                                                                        |
|                                | Asian or Asian British | 726                                                                                                                                                                                                                                                                         | 23 (3.2)                        | <10 <sup>6</sup>                  | <10 <sup>6</sup>                    | <10 <sup>6</sup>                  |                                                                        |
|                                | Black or Black British | 364                                                                                                                                                                                                                                                                         | 27 (7.4)                        | <10 <sup>6</sup>                  | <10 <sup>6</sup>                    | <10 <sup>6</sup>                  |                                                                        |
|                                | Chinese and Other      | 167                                                                                                                                                                                                                                                                         | <10 <sup>6</sup>                | <10 <sup>6</sup>                  | <10 <sup>6</sup>                    | <10 <sup>6</sup>                  |                                                                        |
|                                | Unclassified           | 409                                                                                                                                                                                                                                                                         | 24 (5.9)                        | <10 <sup>6</sup>                  | <10 <sup>6</sup>                    | <10 <sup>6</sup>                  |                                                                        |
| 2019/20                        | White                  | 16,606                                                                                                                                                                                                                                                                      | 1,309 (7.9)                     | 287 (21.9)                        | <10 <sup>6</sup>                    | 287 (21.9)                        |                                                                        |
|                                | Mixed                  | 409                                                                                                                                                                                                                                                                         | 24 (5.9)                        | <10 <sup>6</sup>                  | <10 <sup>6</sup>                    | <10 <sup>6</sup>                  |                                                                        |
|                                | Asian or Asian British | 755                                                                                                                                                                                                                                                                         | 21 (2.8)                        | <10 <sup>6</sup>                  | <10 <sup>6</sup>                    | <10 <sup>6</sup>                  |                                                                        |
|                                | Black or Black British | 451                                                                                                                                                                                                                                                                         | 29 (6.4)                        | <10 <sup>6</sup>                  | <10 <sup>6</sup>                    | <10 <sup>6</sup>                  |                                                                        |
|                                | Chinese and Other      | 163                                                                                                                                                                                                                                                                         | <10 <sup>6</sup>                | <10 <sup>6</sup>                  | <10 <sup>6</sup>                    | <10 <sup>6</sup>                  |                                                                        |
|                                | Unclassified           | 387                                                                                                                                                                                                                                                                         | 24 (6.2)                        | <10 <sup>6</sup>                  | <10 <sup>6</sup>                    | <10 <sup>6</sup>                  |                                                                        |

<sup>1</sup>Eligible for indicator; <sup>2</sup>Achieve in current prison; <sup>3</sup>Achieve in previous prison; <sup>4</sup>Overall achievement - either current or previous prison; <sup>5</sup>Declined indicator; <sup>6</sup>Suppressed (<10) to avoid disclosure

The proportion of people with a new diagnosis of any form of dementia in the reporting year, and who have a record of the following blood tests between 12 months before and 6 months after the date of diagnosis: full blood count, calcium, glucose and/or HbA1C, urea and electrolytes, liver function, thyroid function, serum vitamin B12, folate levels

no comparable data in QOF 2019/20. Most recent QOF data was from 2018/19 and achievement was 70.01%

| Indicator                   | Variable  | Population | Eligible <sup>1</sup><br>(% popln) | FBC (% eligible)     |                        | Calcium (% eligible) |                        | Hb1Ac (% eligible)   |                        | Renal (% eligible)   |                        |
|-----------------------------|-----------|------------|------------------------------------|----------------------|------------------------|----------------------|------------------------|----------------------|------------------------|----------------------|------------------------|
|                             |           |            |                                    | Satisfy <sup>2</sup> | Elsewhere <sup>3</sup> | Satisfy <sup>2</sup> | Elsewhere <sup>3</sup> | Satisfy <sup>2</sup> | Elsewhere <sup>3</sup> | Satisfy <sup>2</sup> | Elsewhere <sup>3</sup> |
| <b>Group: Mental health</b> |           |            |                                    |                      |                        |                      |                        |                      |                        |                      |                        |
| <b>Year</b>                 |           |            |                                    |                      |                        |                      |                        |                      |                        |                      |                        |
|                             | 2017/18   | 21,677     | 10 (0.0)                           | <10 <sup>6</sup>     | <10 <sup>6</sup>       | <10 <sup>6</sup>     | <10 <sup>6</sup>       | <10 <sup>6</sup>     | <10 <sup>6</sup>       | <10 <sup>6</sup>     | <10 <sup>6</sup>       |
|                             | 2018/19   | 22,099     | 10 (0.0)                           | <10 <sup>6</sup>     | <10 <sup>6</sup>       | <10 <sup>6</sup>     | <10 <sup>6</sup>       | <10 <sup>6</sup>     | <10 <sup>6</sup>       | <10 <sup>6</sup>     | <10 <sup>6</sup>       |
|                             | 2019/20   | 25,811     | 13 (0.1)                           | <10 <sup>6</sup>     | <10 <sup>6</sup>       | <10 <sup>6</sup>     | <10 <sup>6</sup>       | <10 <sup>6</sup>     | <10 <sup>6</sup>       | <10 <sup>6</sup>     | <10 <sup>6</sup>       |
| <b>Prison</b>               |           |            |                                    |                      |                        |                      |                        |                      |                        |                      |                        |
| <b>2017/18</b>              |           |            |                                    |                      |                        |                      |                        |                      |                        |                      |                        |
|                             | Prison 1  | 1,323      | <10 <sup>6</sup>                   | <10 <sup>6</sup>     | <10 <sup>6</sup>       | <10 <sup>6</sup>     | <10 <sup>6</sup>       | <10 <sup>6</sup>     | <10 <sup>6</sup>       | <10 <sup>6</sup>     | <10 <sup>6</sup>       |
|                             | Prison 2  | 3,261      | <10 <sup>6</sup>                   | <10 <sup>6</sup>     | <10 <sup>6</sup>       | <10 <sup>6</sup>     | <10 <sup>6</sup>       | <10 <sup>6</sup>     | <10 <sup>6</sup>       | <10 <sup>6</sup>     | <10 <sup>6</sup>       |
|                             | Prison 3  | 2,623      | <10 <sup>6</sup>                   | <10 <sup>6</sup>     | <10 <sup>6</sup>       | <10 <sup>6</sup>     | <10 <sup>6</sup>       | <10 <sup>6</sup>     | <10 <sup>6</sup>       | <10 <sup>6</sup>     | <10 <sup>6</sup>       |
|                             | Prison 4  | 2,089      | <10 <sup>6</sup>                   | <10 <sup>6</sup>     | <10 <sup>6</sup>       | <10 <sup>6</sup>     | <10 <sup>6</sup>       | <10 <sup>6</sup>     | <10 <sup>6</sup>       | <10 <sup>6</sup>     | <10 <sup>6</sup>       |
|                             | Prison 5  | 637        | <10 <sup>6</sup>                   | <10 <sup>6</sup>     | <10 <sup>6</sup>       | <10 <sup>6</sup>     | <10 <sup>6</sup>       | <10 <sup>6</sup>     | <10 <sup>6</sup>       | <10 <sup>6</sup>     | <10 <sup>6</sup>       |
|                             | Prison 6  | 1,552      | <10 <sup>6</sup>                   | <10 <sup>6</sup>     | <10 <sup>6</sup>       | <10 <sup>6</sup>     | <10 <sup>6</sup>       | <10 <sup>6</sup>     | <10 <sup>6</sup>       | <10 <sup>6</sup>     | <10 <sup>6</sup>       |
|                             | Prison 7  | 635        | <10 <sup>6</sup>                   | <10 <sup>6</sup>     | <10 <sup>6</sup>       | <10 <sup>6</sup>     | <10 <sup>6</sup>       | <10 <sup>6</sup>     | <10 <sup>6</sup>       | <10 <sup>6</sup>     | <10 <sup>6</sup>       |
|                             | Prison 8  | 1,085      | <10 <sup>6</sup>                   | <10 <sup>6</sup>     | <10 <sup>6</sup>       | <10 <sup>6</sup>     | <10 <sup>6</sup>       | <10 <sup>6</sup>     | <10 <sup>6</sup>       | <10 <sup>6</sup>     | <10 <sup>6</sup>       |
|                             | Prison 9  | 981        | <10 <sup>6</sup>                   | <10 <sup>6</sup>     | <10 <sup>6</sup>       | <10 <sup>6</sup>     | <10 <sup>6</sup>       | <10 <sup>6</sup>     | <10 <sup>6</sup>       | <10 <sup>6</sup>     | <10 <sup>6</sup>       |
|                             | Prison 10 | 2,523      | <10 <sup>6</sup>                   | <10 <sup>6</sup>     | <10 <sup>6</sup>       | <10 <sup>6</sup>     | <10 <sup>6</sup>       | <10 <sup>6</sup>     | <10 <sup>6</sup>       | <10 <sup>6</sup>     | <10 <sup>6</sup>       |
|                             | Prison 11 | 3,470      | <10 <sup>6</sup>                   | <10 <sup>6</sup>     | <10 <sup>6</sup>       | <10 <sup>6</sup>     | <10 <sup>6</sup>       | <10 <sup>6</sup>     | <10 <sup>6</sup>       | <10 <sup>6</sup>     | <10 <sup>6</sup>       |
|                             | Prison 12 | 815        | <10 <sup>6</sup>                   | <10 <sup>6</sup>     | <10 <sup>6</sup>       | <10 <sup>6</sup>     | <10 <sup>6</sup>       | <10 <sup>6</sup>     | <10 <sup>6</sup>       | <10 <sup>6</sup>     | <10 <sup>6</sup>       |
|                             | Prison 13 | 683        | <10 <sup>6</sup>                   | <10 <sup>6</sup>     | <10 <sup>6</sup>       | <10 <sup>6</sup>     | <10 <sup>6</sup>       | <10 <sup>6</sup>     | <10 <sup>6</sup>       | <10 <sup>6</sup>     | <10 <sup>6</sup>       |
| <b>2018/19</b>              |           |            |                                    |                      |                        |                      |                        |                      |                        |                      |                        |
|                             | Prison 1  | 1,333      | <10 <sup>6</sup>                   | <10 <sup>6</sup>     | <10 <sup>6</sup>       | <10 <sup>6</sup>     | <10 <sup>6</sup>       | <10 <sup>6</sup>     | <10 <sup>6</sup>       | <10 <sup>6</sup>     | <10 <sup>6</sup>       |
|                             | Prison 2  | 2,705      | <10 <sup>6</sup>                   | <10 <sup>6</sup>     | <10 <sup>6</sup>       | <10 <sup>6</sup>     | <10 <sup>6</sup>       | <10 <sup>6</sup>     | <10 <sup>6</sup>       | <10 <sup>6</sup>     | <10 <sup>6</sup>       |
|                             | Prison 3  | 2,522      | <10 <sup>6</sup>                   | <10 <sup>6</sup>     | <10 <sup>6</sup>       | <10 <sup>6</sup>     | <10 <sup>6</sup>       | <10 <sup>6</sup>     | <10 <sup>6</sup>       | <10 <sup>6</sup>     | <10 <sup>6</sup>       |
|                             | Prison 4  | 2,349      | <10 <sup>6</sup>                   | <10 <sup>6</sup>     | <10 <sup>6</sup>       | <10 <sup>6</sup>     | <10 <sup>6</sup>       | <10 <sup>6</sup>     | <10 <sup>6</sup>       | <10 <sup>6</sup>     | <10 <sup>6</sup>       |
|                             | Prison 5  | 676        | <10 <sup>6</sup>                   | <10 <sup>6</sup>     | <10 <sup>6</sup>       | <10 <sup>6</sup>     | <10 <sup>6</sup>       | <10 <sup>6</sup>     | <10 <sup>6</sup>       | <10 <sup>6</sup>     | <10 <sup>6</sup>       |
|                             | Prison 6  | 1,513      | <10 <sup>6</sup>                   | <10 <sup>6</sup>     | <10 <sup>6</sup>       | <10 <sup>6</sup>     | <10 <sup>6</sup>       | <10 <sup>6</sup>     | <10 <sup>6</sup>       | <10 <sup>6</sup>     | <10 <sup>6</sup>       |
|                             | Prison 7  | 654        | <10 <sup>6</sup>                   | <10 <sup>6</sup>     | <10 <sup>6</sup>       | <10 <sup>6</sup>     | <10 <sup>6</sup>       | <10 <sup>6</sup>     | <10 <sup>6</sup>       | <10 <sup>6</sup>     | <10 <sup>6</sup>       |
|                             | Prison 8  | 1,148      | <10 <sup>6</sup>                   | <10 <sup>6</sup>     | <10 <sup>6</sup>       | <10 <sup>6</sup>     | <10 <sup>6</sup>       | <10 <sup>6</sup>     | <10 <sup>6</sup>       | <10 <sup>6</sup>     | <10 <sup>6</sup>       |
|                             | Prison 9  | 996        | <10 <sup>6</sup>                   | <10 <sup>6</sup>     | <10 <sup>6</sup>       | <10 <sup>6</sup>     | <10 <sup>6</sup>       | <10 <sup>6</sup>     | <10 <sup>6</sup>       | <10 <sup>6</sup>     | <10 <sup>6</sup>       |
|                             | Prison 10 | 2,717      | <10 <sup>6</sup>                   | <10 <sup>6</sup>     | <10 <sup>6</sup>       | <10 <sup>6</sup>     | <10 <sup>6</sup>       | <10 <sup>6</sup>     | <10 <sup>6</sup>       | <10 <sup>6</sup>     | <10 <sup>6</sup>       |
|                             | Prison 11 | 4,020      | <10 <sup>6</sup>                   | <10 <sup>6</sup>     | <10 <sup>6</sup>       | <10 <sup>6</sup>     | <10 <sup>6</sup>       | <10 <sup>6</sup>     | <10 <sup>6</sup>       | <10 <sup>6</sup>     | <10 <sup>6</sup>       |
|                             | Prison 12 | 792        | <10 <sup>6</sup>                   | <10 <sup>6</sup>     | <10 <sup>6</sup>       | <10 <sup>6</sup>     | <10 <sup>6</sup>       | <10 <sup>6</sup>     | <10 <sup>6</sup>       | <10 <sup>6</sup>     | <10 <sup>6</sup>       |
|                             | Prison 13 | 674        | <10 <sup>6</sup>                   | <10 <sup>6</sup>     | <10 <sup>6</sup>       | <10 <sup>6</sup>     | <10 <sup>6</sup>       | <10 <sup>6</sup>     | <10 <sup>6</sup>       | <10 <sup>6</sup>     | <10 <sup>6</sup>       |
| <b>2019/20</b>              |           |            |                                    |                      |                        |                      |                        |                      |                        |                      |                        |
|                             | Prison 1  | 1,410      | <10 <sup>6</sup>                   | <10 <sup>6</sup>     | <10 <sup>6</sup>       | <10 <sup>6</sup>     | <10 <sup>6</sup>       | <10 <sup>6</sup>     | <10 <sup>6</sup>       | <10 <sup>6</sup>     | <10 <sup>6</sup>       |
|                             | Prison 2  | 2,979      | <10 <sup>6</sup>                   | <10 <sup>6</sup>     | <10 <sup>6</sup>       | <10 <sup>6</sup>     | <10 <sup>6</sup>       | <10 <sup>6</sup>     | <10 <sup>6</sup>       | <10 <sup>6</sup>     | <10 <sup>6</sup>       |
|                             | Prison 3  | 2,809      | <10 <sup>6</sup>                   | <10 <sup>6</sup>     | <10 <sup>6</sup>       | <10 <sup>6</sup>     | <10 <sup>6</sup>       | <10 <sup>6</sup>     | <10 <sup>6</sup>       | <10 <sup>6</sup>     | <10 <sup>6</sup>       |
|                             | Prison 4  | 2,651      | <10 <sup>6</sup>                   | <10 <sup>6</sup>     | <10 <sup>6</sup>       | <10 <sup>6</sup>     | <10 <sup>6</sup>       | <10 <sup>6</sup>     | <10 <sup>6</sup>       | <10 <sup>6</sup>     | <10 <sup>6</sup>       |
|                             | Prison 5  | 616        | <10 <sup>6</sup>                   | <10 <sup>6</sup>     | <10 <sup>6</sup>       | <10 <sup>6</sup>     | <10 <sup>6</sup>       | <10 <sup>6</sup>     | <10 <sup>6</sup>       | <10 <sup>6</sup>     | <10 <sup>6</sup>       |
|                             | Prison 6  | 1,533      | <10 <sup>6</sup>                   | <10 <sup>6</sup>     | <10 <sup>6</sup>       | <10 <sup>6</sup>     | <10 <sup>6</sup>       | <10 <sup>6</sup>     | <10 <sup>6</sup>       | <10 <sup>6</sup>     | <10 <sup>6</sup>       |
|                             | Prison 7  | 860        | <10 <sup>6</sup>                   | <10 <sup>6</sup>     | <10 <sup>6</sup>       | <10 <sup>6</sup>     | <10 <sup>6</sup>       | <10 <sup>6</sup>     | <10 <sup>6</sup>       | <10 <sup>6</sup>     | <10 <sup>6</sup>       |
|                             | Prison 8  | 1,385      | <10 <sup>6</sup>                   | <10 <sup>6</sup>     | <10 <sup>6</sup>       | <10 <sup>6</sup>     | <10 <sup>6</sup>       | <10 <sup>6</sup>     | <10 <sup>6</sup>       | <10 <sup>6</sup>     | <10 <sup>6</sup>       |
|                             | Prison 9  | 1,092      | <10 <sup>6</sup>                   | <10 <sup>6</sup>     | <10 <sup>6</sup>       | <10 <sup>6</sup>     | <10 <sup>6</sup>       | <10 <sup>6</sup>     | <10 <sup>6</sup>       | <10 <sup>6</sup>     | <10 <sup>6</sup>       |
|                             | Prison 10 | 3,577      | <10 <sup>6</sup>                   | <10 <sup>6</sup>     | <10 <sup>6</sup>       | <10 <sup>6</sup>     | <10 <sup>6</sup>       | <10 <sup>6</sup>     | <10 <sup>6</sup>       | <10 <sup>6</sup>     | <10 <sup>6</sup>       |
|                             | Prison 11 | 5,348      | <10 <sup>6</sup>                   | <10 <sup>6</sup>     | <10 <sup>6</sup>       | <10 <sup>6</sup>     | <10 <sup>6</sup>       | <10 <sup>6</sup>     | <10 <sup>6</sup>       | <10 <sup>6</sup>     | <10 <sup>6</sup>       |
|                             | Prison 12 | 805        | <10 <sup>6</sup>                   | <10 <sup>6</sup>     | <10 <sup>6</sup>       | <10 <sup>6</sup>     | <10 <sup>6</sup>       | <10 <sup>6</sup>     | <10 <sup>6</sup>       | <10 <sup>6</sup>     | <10 <sup>6</sup>       |
|                             | Prison 13 | 746        | <10 <sup>6</sup>                   | <10 <sup>6</sup>     | <10 <sup>6</sup>       | <10 <sup>6</sup>     | <10 <sup>6</sup>       | <10 <sup>6</sup>     | <10 <sup>6</sup>       | <10 <sup>6</sup>     | <10 <sup>6</sup>       |
| <b>Prison category</b>      |           |            |                                    |                      |                        |                      |                        |                      |                        |                      |                        |
| <b>2017/18</b>              |           |            |                                    |                      |                        |                      |                        |                      |                        |                      |                        |
|                             | A         | 1,664      | <10 <sup>6</sup>                   | <10 <sup>6</sup>     | <10 <sup>6</sup>       | <10 <sup>6</sup>     | <10 <sup>6</sup>       | <10 <sup>6</sup>     | <10 <sup>6</sup>       | <10 <sup>6</sup>     | <10 <sup>6</sup>       |
|                             | B         | 9,254      | <10 <sup>6</sup>                   | <10 <sup>6</sup>     | <10 <sup>6</sup>       | <10 <sup>6</sup>     | <10 <sup>6</sup>       | <10 <sup>6</sup>     | <10 <sup>6</sup>       | <10 <sup>6</sup>     | <10 <sup>6</sup>       |
|                             | C         | 6,035      | <10 <sup>6</sup>                   | <10 <sup>6</sup>     | <10 <sup>6</sup>       | <10 <sup>6</sup>     | <10 <sup>6</sup>       | <10 <sup>6</sup>     | <10 <sup>6</sup>       | <10 <sup>6</sup>     | <10 <sup>6</sup>       |
|                             | Closed    | 1,720      | <10 <sup>6</sup>                   | <10 <sup>6</sup>     | <10 <sup>6</sup>       | <10 <sup>6</sup>     | <10 <sup>6</sup>       | <10 <sup>6</sup>     | <10 <sup>6</sup>       | <10 <sup>6</sup>     | <10 <sup>6</sup>       |
|                             | D         | 2,189      | <10 <sup>6</sup>                   | <10 <sup>6</sup>     | <10 <sup>6</sup>       | <10 <sup>6</sup>     | <10 <sup>6</sup>       | <10 <sup>6</sup>     | <10 <sup>6</sup>       | <10 <sup>6</sup>     | <10 <sup>6</sup>       |
|                             | YOI       | 815        | <10 <sup>6</sup>                   | <10 <sup>6</sup>     | <10 <sup>6</sup>       | <10 <sup>6</sup>     | <10 <sup>6</sup>       | <10 <sup>6</sup>     | <10 <sup>6</sup>       | <10 <sup>6</sup>     | <10 <sup>6</sup>       |
| <b>2018/19</b>              |           |            |                                    |                      |                        |                      |                        |                      |                        |                      |                        |
|                             | A         | 1,670      | <10 <sup>6</sup>                   | <10 <sup>6</sup>     | <10 <sup>6</sup>       | <10 <sup>6</sup>     | <10 <sup>6</sup>       | <10 <sup>6</sup>     | <10 <sup>6</sup>       | <10 <sup>6</sup>     | <10 <sup>6</sup>       |
|                             | B         | 9,442      | <10 <sup>6</sup>                   | <10 <sup>6</sup>     | <10 <sup>6</sup>       | <10 <sup>6</sup>     | <10 <sup>6</sup>       | <10 <sup>6</sup>     | <10 <sup>6</sup>       | <10 <sup>6</sup>     | <10 <sup>6</sup>       |
|                             | C         | 6,204      | <10 <sup>6</sup>                   | <10 <sup>6</sup>     | <10 <sup>6</sup>       | <10 <sup>6</sup>     | <10 <sup>6</sup>       | <10 <sup>6</sup>     | <10 <sup>6</sup>       | <10 <sup>6</sup>     | <10 <sup>6</sup>       |
|                             | Closed    | 1,802      | <10 <sup>6</sup>                   | <10 <sup>6</sup>     | <10 <sup>6</sup>       | <10 <sup>6</sup>     | <10 <sup>6</sup>       | <10 <sup>6</sup>     | <10 <sup>6</sup>       | <10 <sup>6</sup>     | <10 <sup>6</sup>       |
|                             | D         | 2,189      | <10 <sup>6</sup>                   | <10 <sup>6</sup>     | <10 <sup>6</sup>       | <10 <sup>6</sup>     | <10 <sup>6</sup>       | <10 <sup>6</sup>     | <10 <sup>6</sup>       | <10 <sup>6</sup>     | <10 <sup>6</sup>       |
|                             | YOI       | 792        | <10 <sup>6</sup>                   | <10 <sup>6</sup>     | <10 <sup>6</sup>       | <10 <sup>6</sup>     | <10 <sup>6</sup>       | <10 <sup>6</sup>     | <10 <sup>6</sup>       | <10 <sup>6</sup>     | <10 <sup>6</sup>       |

<sup>1</sup>Eligible for indicator; <sup>2</sup>Achieve in current prison; <sup>3</sup>Achieve in previous prison; <sup>4</sup>Overall achievement - either current or previous prison; <sup>5</sup>Declined indicator; <sup>6</sup>Suppressed (<10) to avoid disclosure

**The proportion of people with a new diagnosis of any form of dementia in the reporting year, and who have a record of the following blood tests between 12 months before and 6 months after the date of diagnosis: full blood count, calcium, glucose and/or HbA1C, urea and electrolytes, liver function, thyroid function, serum vitamin B12, folate levels**

no comparable data in QOF 2019/20. Most recent QOF data was from 2018/19 and achievement was 70.01%

| Indicator                   | Variable  | Eligible <sup>1</sup><br>(% popln) | Thyroid (% eligible) |                        | Serum (% eligible)   |                        | Folate (% eligible)  |                        |
|-----------------------------|-----------|------------------------------------|----------------------|------------------------|----------------------|------------------------|----------------------|------------------------|
|                             |           |                                    | Satisfy <sup>2</sup> | Elsewhere <sup>3</sup> | Satisfy <sup>2</sup> | Elsewhere <sup>3</sup> | Satisfy <sup>2</sup> | Elsewhere <sup>3</sup> |
| <b>Group: Mental health</b> |           |                                    |                      |                        |                      |                        |                      |                        |
| Year                        |           |                                    |                      |                        |                      |                        |                      |                        |
|                             | 2017/18   | 10                                 | <10 <sup>6</sup>     | <10 <sup>6</sup>       | <10 <sup>6</sup>     | <10 <sup>6</sup>       | <10 <sup>6</sup>     | <10 <sup>6</sup>       |
|                             | 2018/19   | 10                                 | <10 <sup>6</sup>     | <10 <sup>6</sup>       | <10 <sup>6</sup>     | <10 <sup>6</sup>       | <10 <sup>6</sup>     | <10 <sup>6</sup>       |
|                             | 2019/20   | 13                                 | <10 <sup>6</sup>     | <10 <sup>6</sup>       | <10 <sup>6</sup>     | <10 <sup>6</sup>       | <10 <sup>6</sup>     | <10 <sup>6</sup>       |
| <b>Prison</b>               |           |                                    |                      |                        |                      |                        |                      |                        |
| 2017/18                     | Prison 1  | <10 <sup>0</sup>                   | <10 <sup>6</sup>     | <10 <sup>6</sup>       | <10 <sup>6</sup>     | 0 (0.0)                | <10 <sup>6</sup>     | <10 <sup>6</sup>       |
|                             | Prison 2  | <10 <sup>0</sup>                   | <10 <sup>6</sup>     | <10 <sup>6</sup>       | <10 <sup>6</sup>     | <10 <sup>6</sup>       | <10 <sup>6</sup>     | <10 <sup>6</sup>       |
|                             | Prison 3  | <10 <sup>0</sup>                   | <10 <sup>6</sup>     | <10 <sup>6</sup>       | <10 <sup>6</sup>     | <10 <sup>6</sup>       | <10 <sup>6</sup>     | <10 <sup>6</sup>       |
|                             | Prison 4  | <10 <sup>0</sup>                   | <10 <sup>6</sup>     | <10 <sup>6</sup>       | <10 <sup>6</sup>     | <10 <sup>6</sup>       | <10 <sup>6</sup>     | <10 <sup>6</sup>       |
|                             | Prison 5  | <10 <sup>0</sup>                   | <10 <sup>6</sup>     | <10 <sup>6</sup>       | <10 <sup>6</sup>     | <10 <sup>6</sup>       | <10 <sup>6</sup>     | <10 <sup>6</sup>       |
|                             | Prison 6  | <10 <sup>0</sup>                   | <10 <sup>6</sup>     | <10 <sup>6</sup>       | <10 <sup>6</sup>     | <10 <sup>6</sup>       | <10 <sup>6</sup>     | <10 <sup>6</sup>       |
|                             | Prison 7  | <10 <sup>0</sup>                   | <10 <sup>6</sup>     | <10 <sup>6</sup>       | <10 <sup>6</sup>     | <10 <sup>6</sup>       | <10 <sup>6</sup>     | <10 <sup>6</sup>       |
|                             | Prison 8  | <10 <sup>0</sup>                   | <10 <sup>6</sup>     | <10 <sup>6</sup>       | <10 <sup>6</sup>     | <10 <sup>6</sup>       | <10 <sup>6</sup>     | <10 <sup>6</sup>       |
|                             | Prison 9  | <10 <sup>0</sup>                   | <10 <sup>6</sup>     | <10 <sup>6</sup>       | <10 <sup>6</sup>     | <10 <sup>6</sup>       | <10 <sup>6</sup>     | <10 <sup>6</sup>       |
|                             | Prison 10 | <10 <sup>0</sup>                   | <10 <sup>6</sup>     | <10 <sup>6</sup>       | <10 <sup>6</sup>     | <10 <sup>6</sup>       | <10 <sup>6</sup>     | <10 <sup>6</sup>       |
|                             | Prison 11 | <10 <sup>0</sup>                   | <10 <sup>6</sup>     | <10 <sup>6</sup>       | <10 <sup>6</sup>     | <10 <sup>6</sup>       | <10 <sup>6</sup>     | <10 <sup>6</sup>       |
|                             | Prison 12 | <10 <sup>0</sup>                   | <10 <sup>6</sup>     | <10 <sup>6</sup>       | <10 <sup>6</sup>     | <10 <sup>6</sup>       | <10 <sup>6</sup>     | <10 <sup>6</sup>       |
|                             | Prison 13 | <10 <sup>0</sup>                   | <10 <sup>6</sup>     | <10 <sup>6</sup>       | <10 <sup>6</sup>     | <10 <sup>6</sup>       | <10 <sup>6</sup>     | <10 <sup>6</sup>       |
| 2018/19                     | Prison 1  | <10 <sup>0</sup>                   | <10 <sup>6</sup>     | <10 <sup>6</sup>       | <10 <sup>6</sup>     | <10 <sup>6</sup>       | <10 <sup>6</sup>     | <10 <sup>6</sup>       |
|                             | Prison 2  | <10 <sup>0</sup>                   | <10 <sup>6</sup>     | <10 <sup>6</sup>       | <10 <sup>6</sup>     | <10 <sup>6</sup>       | <10 <sup>6</sup>     | <10 <sup>6</sup>       |
|                             | Prison 3  | <10 <sup>0</sup>                   | <10 <sup>6</sup>     | <10 <sup>6</sup>       | <10 <sup>6</sup>     | <10 <sup>6</sup>       | <10 <sup>6</sup>     | <10 <sup>6</sup>       |
|                             | Prison 4  | <10 <sup>0</sup>                   | <10 <sup>6</sup>     | <10 <sup>6</sup>       | <10 <sup>6</sup>     | <10 <sup>6</sup>       | <10 <sup>6</sup>     | <10 <sup>6</sup>       |
|                             | Prison 5  | <10 <sup>0</sup>                   | <10 <sup>6</sup>     | <10 <sup>6</sup>       | <10 <sup>6</sup>     | <10 <sup>6</sup>       | <10 <sup>6</sup>     | <10 <sup>6</sup>       |
|                             | Prison 6  | <10 <sup>0</sup>                   | <10 <sup>6</sup>     | <10 <sup>6</sup>       | <10 <sup>6</sup>     | <10 <sup>6</sup>       | <10 <sup>6</sup>     | <10 <sup>6</sup>       |
|                             | Prison 7  | <10 <sup>0</sup>                   | <10 <sup>6</sup>     | <10 <sup>6</sup>       | <10 <sup>6</sup>     | <10 <sup>6</sup>       | <10 <sup>6</sup>     | <10 <sup>6</sup>       |
|                             | Prison 8  | <10 <sup>0</sup>                   | <10 <sup>6</sup>     | <10 <sup>6</sup>       | <10 <sup>6</sup>     | <10 <sup>6</sup>       | <10 <sup>6</sup>     | <10 <sup>6</sup>       |
|                             | Prison 9  | <10 <sup>0</sup>                   | <10 <sup>6</sup>     | <10 <sup>6</sup>       | <10 <sup>6</sup>     | <10 <sup>6</sup>       | <10 <sup>6</sup>     | <10 <sup>6</sup>       |
|                             | Prison 10 | <10 <sup>0</sup>                   | <10 <sup>6</sup>     | <10 <sup>6</sup>       | <10 <sup>6</sup>     | <10 <sup>6</sup>       | <10 <sup>6</sup>     | <10 <sup>6</sup>       |
|                             | Prison 11 | <10 <sup>0</sup>                   | <10 <sup>6</sup>     | <10 <sup>6</sup>       | <10 <sup>6</sup>     | <10 <sup>6</sup>       | <10 <sup>6</sup>     | <10 <sup>6</sup>       |
|                             | Prison 12 | <10 <sup>0</sup>                   | <10 <sup>6</sup>     | <10 <sup>6</sup>       | <10 <sup>6</sup>     | <10 <sup>6</sup>       | <10 <sup>6</sup>     | <10 <sup>6</sup>       |
|                             | Prison 13 | <10 <sup>0</sup>                   | <10 <sup>6</sup>     | <10 <sup>6</sup>       | <10 <sup>6</sup>     | <10 <sup>6</sup>       | <10 <sup>6</sup>     | <10 <sup>6</sup>       |
| 2019/20                     | Prison 1  | <10 <sup>0</sup>                   | <10 <sup>6</sup>     | <10 <sup>6</sup>       | <10 <sup>6</sup>     | <10 <sup>6</sup>       | <10 <sup>6</sup>     | <10 <sup>6</sup>       |
|                             | Prison 2  | <10 <sup>0</sup>                   | <10 <sup>6</sup>     | <10 <sup>6</sup>       | <10 <sup>6</sup>     | <10 <sup>6</sup>       | <10 <sup>6</sup>     | <10 <sup>6</sup>       |
|                             | Prison 3  | <10 <sup>0</sup>                   | <10 <sup>6</sup>     | <10 <sup>6</sup>       | <10 <sup>6</sup>     | <10 <sup>6</sup>       | <10 <sup>6</sup>     | <10 <sup>6</sup>       |
|                             | Prison 4  | <10 <sup>0</sup>                   | <10 <sup>6</sup>     | <10 <sup>6</sup>       | <10 <sup>6</sup>     | <10 <sup>6</sup>       | <10 <sup>6</sup>     | <10 <sup>6</sup>       |
|                             | Prison 5  | <10 <sup>0</sup>                   | <10 <sup>6</sup>     | <10 <sup>6</sup>       | <10 <sup>6</sup>     | <10 <sup>6</sup>       | <10 <sup>6</sup>     | <10 <sup>6</sup>       |
|                             | Prison 6  | <10 <sup>0</sup>                   | <10 <sup>6</sup>     | <10 <sup>6</sup>       | <10 <sup>6</sup>     | <10 <sup>6</sup>       | <10 <sup>6</sup>     | <10 <sup>6</sup>       |
|                             | Prison 7  | <10 <sup>0</sup>                   | <10 <sup>6</sup>     | <10 <sup>6</sup>       | <10 <sup>6</sup>     | <10 <sup>6</sup>       | <10 <sup>6</sup>     | <10 <sup>6</sup>       |
|                             | Prison 8  | <10 <sup>0</sup>                   | <10 <sup>6</sup>     | <10 <sup>6</sup>       | <10 <sup>6</sup>     | <10 <sup>6</sup>       | <10 <sup>6</sup>     | <10 <sup>6</sup>       |
|                             | Prison 9  | <10 <sup>0</sup>                   | <10 <sup>6</sup>     | <10 <sup>6</sup>       | <10 <sup>6</sup>     | <10 <sup>6</sup>       | <10 <sup>6</sup>     | <10 <sup>6</sup>       |
|                             | Prison 10 | <10 <sup>0</sup>                   | <10 <sup>6</sup>     | <10 <sup>6</sup>       | <10 <sup>6</sup>     | <10 <sup>6</sup>       | <10 <sup>6</sup>     | <10 <sup>6</sup>       |
|                             | Prison 11 | <10 <sup>0</sup>                   | <10 <sup>6</sup>     | <10 <sup>6</sup>       | <10 <sup>6</sup>     | <10 <sup>6</sup>       | <10 <sup>6</sup>     | <10 <sup>6</sup>       |
|                             | Prison 12 | <10 <sup>0</sup>                   | <10 <sup>6</sup>     | <10 <sup>6</sup>       | <10 <sup>6</sup>     | <10 <sup>6</sup>       | <10 <sup>6</sup>     | <10 <sup>6</sup>       |
|                             | Prison 13 | <10 <sup>0</sup>                   | <10 <sup>6</sup>     | <10 <sup>6</sup>       | <10 <sup>6</sup>     | <10 <sup>6</sup>       | <10 <sup>6</sup>     | <10 <sup>6</sup>       |
| <b>Prison category</b>      |           |                                    |                      |                        |                      |                        |                      |                        |
| 2017/18                     | A         | <10 <sup>0</sup>                   | <10 <sup>6</sup>     | <10 <sup>6</sup>       | <10 <sup>6</sup>     | <10 <sup>6</sup>       | <10 <sup>6</sup>     | <10 <sup>6</sup>       |
|                             | B         | <10 <sup>0</sup>                   | <10 <sup>6</sup>     | <10 <sup>6</sup>       | <10 <sup>6</sup>     | <10 <sup>6</sup>       | <10 <sup>6</sup>     | <10 <sup>6</sup>       |
|                             | C         | <10 <sup>0</sup>                   | <10 <sup>6</sup>     | <10 <sup>6</sup>       | <10 <sup>6</sup>     | <10 <sup>6</sup>       | <10 <sup>6</sup>     | <10 <sup>6</sup>       |
|                             | Closed    | <10 <sup>0</sup>                   | <10 <sup>6</sup>     | <10 <sup>6</sup>       | <10 <sup>6</sup>     | <10 <sup>6</sup>       | <10 <sup>6</sup>     | <10 <sup>6</sup>       |
|                             | D         | <10 <sup>0</sup>                   | <10 <sup>6</sup>     | <10 <sup>6</sup>       | <10 <sup>6</sup>     | <10 <sup>6</sup>       | <10 <sup>6</sup>     | <10 <sup>6</sup>       |
|                             | YOI       | <10 <sup>0</sup>                   | <10 <sup>6</sup>     | <10 <sup>6</sup>       | <10 <sup>6</sup>     | <10 <sup>6</sup>       | <10 <sup>6</sup>     | <10 <sup>6</sup>       |
| 2018/19                     | A         | <10 <sup>0</sup>                   | <10 <sup>6</sup>     | <10 <sup>6</sup>       | <10 <sup>6</sup>     | <10 <sup>6</sup>       | <10 <sup>6</sup>     | <10 <sup>6</sup>       |
|                             | B         | <10 <sup>0</sup>                   | <10 <sup>6</sup>     | <10 <sup>6</sup>       | <10 <sup>6</sup>     | <10 <sup>6</sup>       | <10 <sup>6</sup>     | <10 <sup>6</sup>       |
|                             | C         | <10 <sup>0</sup>                   | <10 <sup>6</sup>     | <10 <sup>6</sup>       | <10 <sup>6</sup>     | <10 <sup>6</sup>       | <10 <sup>6</sup>     | <10 <sup>6</sup>       |
|                             | Closed    | <10 <sup>0</sup>                   | <10 <sup>6</sup>     | <10 <sup>6</sup>       | <10 <sup>6</sup>     | <10 <sup>6</sup>       | <10 <sup>6</sup>     | <10 <sup>6</sup>       |
|                             | D         | <10 <sup>0</sup>                   | <10 <sup>6</sup>     | <10 <sup>6</sup>       | <10 <sup>6</sup>     | <10 <sup>6</sup>       | <10 <sup>6</sup>     | <10 <sup>6</sup>       |
|                             | YOI       | <10 <sup>0</sup>                   | <10 <sup>6</sup>     | <10 <sup>6</sup>       | <10 <sup>6</sup>     | <10 <sup>6</sup>       | <10 <sup>6</sup>     | <10 <sup>6</sup>       |

<sup>1</sup>Eligible for indicator; <sup>2</sup>Achieve in current prison; <sup>3</sup>Achieve in previous prison; <sup>4</sup>Overall achievement - either current or previous prison; <sup>5</sup>Declined indicator; <sup>6</sup>Suppressed (<10) to avoid disclosure

The proportion of people with a new diagnosis of any form of dementia in the reporting year, and who have a record of the following blood tests between 12 months before and 6 months after the date of diagnosis: full blood count, calcium, glucose and/or HbA1C, urea and electrolytes, liver function, thyroid function, serum vitamin B12, folate levels

no comparable data in QOF 2019/20. Most recent QOF data was from 2018/19 and achievement was 70.01%

| Indicator       | Group: Mental health |                                |                                    |                        |                      |                        |                      |                        |                      |                        |                  |                  |
|-----------------|----------------------|--------------------------------|------------------------------------|------------------------|----------------------|------------------------|----------------------|------------------------|----------------------|------------------------|------------------|------------------|
|                 | Variable             | Population                     | Eligible <sup>1</sup><br>(% popln) | FBC (% eligible)       |                      | Calcium (% eligible)   |                      | Hb1Ac (% eligible)     |                      | Renal (% eligible)     |                  |                  |
|                 |                      |                                | Satisfy <sup>2</sup>               | Elsewhere <sup>3</sup> | Satisfy <sup>2</sup> | Elsewhere <sup>3</sup> | Satisfy <sup>2</sup> | Elsewhere <sup>3</sup> | Satisfy <sup>2</sup> | Elsewhere <sup>3</sup> |                  |                  |
| 2019/20         | A                    | 1,838                          | <10 <sup>6</sup>                   | <10 <sup>6</sup>       | <10 <sup>6</sup>     | <10 <sup>6</sup>       | <10 <sup>6</sup>     | <10 <sup>6</sup>       | <10 <sup>6</sup>     | <10 <sup>6</sup>       |                  |                  |
|                 | B                    | 11,904                         | <10 <sup>6</sup>                   | <10 <sup>6</sup>       | <10 <sup>6</sup>     | <10 <sup>6</sup>       | <10 <sup>6</sup>     | <10 <sup>6</sup>       | <10 <sup>6</sup>     | <10 <sup>6</sup>       |                  |                  |
|                 | C                    | 6,870                          | <10 <sup>6</sup>                   | <10 <sup>6</sup>       | <10 <sup>6</sup>     | <10 <sup>6</sup>       | <10 <sup>6</sup>     | <10 <sup>6</sup>       | <10 <sup>6</sup>     | <10 <sup>6</sup>       |                  |                  |
|                 | Closed               | 2,245                          | <10 <sup>6</sup>                   | <10 <sup>6</sup>       | <10 <sup>6</sup>     | <10 <sup>6</sup>       | <10 <sup>6</sup>     | <10 <sup>6</sup>       | <10 <sup>6</sup>     | <10 <sup>6</sup>       |                  |                  |
|                 | D                    | 2,149                          | <10 <sup>6</sup>                   | <10 <sup>6</sup>       | <10 <sup>6</sup>     | <10 <sup>6</sup>       | <10 <sup>6</sup>     | <10 <sup>6</sup>       | <10 <sup>6</sup>     | <10 <sup>6</sup>       |                  |                  |
|                 | YOI                  | 805                            | <10 <sup>6</sup>                   | <10 <sup>6</sup>       | <10 <sup>6</sup>     | <10 <sup>6</sup>       | <10 <sup>6</sup>     | <10 <sup>6</sup>       | <10 <sup>6</sup>     | <10 <sup>6</sup>       |                  |                  |
| Gender          |                      |                                |                                    |                        |                      |                        |                      |                        |                      |                        |                  |                  |
|                 |                      |                                |                                    |                        |                      |                        |                      |                        |                      |                        |                  |                  |
| 2017/18         | F                    | 1,699                          | <10 <sup>6</sup>                   | <10 <sup>6</sup>       | <10 <sup>6</sup>     | <10 <sup>6</sup>       | <10 <sup>6</sup>     | <10 <sup>6</sup>       | <10 <sup>6</sup>     | <10 <sup>6</sup>       |                  |                  |
|                 | M                    | 19,977                         | 10 (0.1)                           | <10 <sup>6</sup>       | <10 <sup>6</sup>     | <10 <sup>6</sup>       | <10 <sup>6</sup>     | <10 <sup>6</sup>       | <10 <sup>6</sup>     | <10 <sup>6</sup>       |                  |                  |
| 2018/19         | F                    | 1,802                          | <10 <sup>6</sup>                   | <10 <sup>6</sup>       | <10 <sup>6</sup>     | <10 <sup>6</sup>       | <10 <sup>6</sup>     | <10 <sup>6</sup>       | <10 <sup>6</sup>     | <10 <sup>6</sup>       |                  |                  |
|                 | M                    | 20,295                         | 10 (0.0)                           | <10 <sup>6</sup>       | <10 <sup>6</sup>     | <10 <sup>6</sup>       | <10 <sup>6</sup>     | <10 <sup>6</sup>       | <10 <sup>6</sup>     | <10 <sup>6</sup>       |                  |                  |
| 2019/20         | F                    | 1,376                          | <10 <sup>6</sup>                   | <10 <sup>6</sup>       | <10 <sup>6</sup>     | <10 <sup>6</sup>       | <10 <sup>6</sup>     | <10 <sup>6</sup>       | <10 <sup>6</sup>     | <10 <sup>6</sup>       |                  |                  |
|                 | M                    | 23,570                         | 12 (0.1)                           | <10 <sup>6</sup>       | <10 <sup>6</sup>     | <10 <sup>6</sup>       | <10 <sup>6</sup>     | <10 <sup>6</sup>       | <10 <sup>6</sup>     | <10 <sup>6</sup>       |                  |                  |
| Sentence Status |                      |                                |                                    |                        |                      |                        |                      |                        |                      |                        |                  |                  |
|                 | 2017/18              | .                              | 81                                 | <10 <sup>6</sup>       | <10 <sup>6</sup>     | <10 <sup>6</sup>       | <10 <sup>6</sup>     | <10 <sup>6</sup>       | <10 <sup>6</sup>     | <10 <sup>6</sup>       | <10 <sup>6</sup> |                  |
|                 |                      | Abandoned                      | <10 <sup>6</sup>                   | <10 <sup>6</sup>       | <10 <sup>6</sup>     | <10 <sup>6</sup>       | <10 <sup>6</sup>     | <10 <sup>6</sup>       | <10 <sup>6</sup>     | <10 <sup>6</sup>       | <10 <sup>6</sup> |                  |
|                 |                      | Active In                      | 15,872                             | <10 <sup>6</sup>       | <10 <sup>6</sup>     | <10 <sup>6</sup>       | <10 <sup>6</sup>     | <10 <sup>6</sup>       | <10 <sup>6</sup>     | <10 <sup>6</sup>       | <10 <sup>6</sup> |                  |
|                 |                      | Active Out                     | 1,052                              | <10 <sup>6</sup>       | <10 <sup>6</sup>     | <10 <sup>6</sup>       | <10 <sup>6</sup>     | <10 <sup>6</sup>       | <10 <sup>6</sup>     | <10 <sup>6</sup>       | <10 <sup>6</sup> |                  |
|                 |                      | Convicted Sentence             | 2,125                              | <10 <sup>6</sup>       | <10 <sup>6</sup>     | <10 <sup>6</sup>       | <10 <sup>6</sup>     | <10 <sup>6</sup>       | <10 <sup>6</sup>     | <10 <sup>6</sup>       | <10 <sup>6</sup> |                  |
|                 |                      | Downgrade in security category | <10 <sup>6</sup>                   | <10 <sup>6</sup>       | <10 <sup>6</sup>     | <10 <sup>6</sup>       | <10 <sup>6</sup>     | <10 <sup>6</sup>       | <10 <sup>6</sup>     | <10 <sup>6</sup>       | <10 <sup>6</sup> |                  |
|                 |                      | Internal Cell Move             | <10 <sup>6</sup>                   | <10 <sup>6</sup>       | <10 <sup>6</sup>     | <10 <sup>6</sup>       | <10 <sup>6</sup>     | <10 <sup>6</sup>       | <10 <sup>6</sup>     | <10 <sup>6</sup>       | <10 <sup>6</sup> |                  |
|                 |                      | Judges Remand                  | 92                                 | <10 <sup>6</sup>       | <10 <sup>6</sup>     | <10 <sup>6</sup>       | <10 <sup>6</sup>     | <10 <sup>6</sup>       | <10 <sup>6</sup>     | <10 <sup>6</sup>       | <10 <sup>6</sup> |                  |
|                 |                      | Licence Revoke                 | 52                                 | <10 <sup>6</sup>       | <10 <sup>6</sup>     | <10 <sup>6</sup>       | <10 <sup>6</sup>     | <10 <sup>6</sup>       | <10 <sup>6</sup>     | <10 <sup>6</sup>       | <10 <sup>6</sup> |                  |
|                 |                      | On Remand                      | 1,492                              | <10 <sup>6</sup>       | <10 <sup>6</sup>     | <10 <sup>6</sup>       | <10 <sup>6</sup>     | <10 <sup>6</sup>       | <10 <sup>6</sup>     | <10 <sup>6</sup>       | <10 <sup>6</sup> |                  |
|                 |                      | Transfer                       | 910                                | <10 <sup>6</sup>       | <10 <sup>6</sup>     | <10 <sup>6</sup>       | <10 <sup>6</sup>     | <10 <sup>6</sup>       | <10 <sup>6</sup>     | <10 <sup>6</sup>       | <10 <sup>6</sup> |                  |
|                 |                      | Upgrade in security category   | <10 <sup>6</sup>                   | <10 <sup>6</sup>       | <10 <sup>6</sup>     | <10 <sup>6</sup>       | <10 <sup>6</sup>     | <10 <sup>6</sup>       | <10 <sup>6</sup>     | <10 <sup>6</sup>       | <10 <sup>6</sup> |                  |
|                 | 2018/19              | .                              | 88                                 | <10 <sup>6</sup>       | <10 <sup>6</sup>     | <10 <sup>6</sup>       | <10 <sup>6</sup>     | <10 <sup>6</sup>       | <10 <sup>6</sup>     | <10 <sup>6</sup>       | <10 <sup>6</sup> |                  |
|                 |                      |                                | Abandoned                          | <10 <sup>6</sup>       | <10 <sup>6</sup>     | <10 <sup>6</sup>       | <10 <sup>6</sup>     | <10 <sup>6</sup>       | <10 <sup>6</sup>     | <10 <sup>6</sup>       | <10 <sup>6</sup> |                  |
|                 |                      | Active In                      | 18,145                             | <10 <sup>6</sup>       | <10 <sup>6</sup>     | <10 <sup>6</sup>       | <10 <sup>6</sup>     | <10 <sup>6</sup>       | <10 <sup>6</sup>     | <10 <sup>6</sup>       |                  |                  |
|                 |                      | Active Out                     | 835                                | <10 <sup>6</sup>       | <10 <sup>6</sup>     | <10 <sup>6</sup>       | <10 <sup>6</sup>     | <10 <sup>6</sup>       | <10 <sup>6</sup>     | <10 <sup>6</sup>       |                  |                  |
|                 |                      | Convicted Sentence             | 1,320                              | <10 <sup>6</sup>       | <10 <sup>6</sup>     | <10 <sup>6</sup>       | <10 <sup>6</sup>     | <10 <sup>6</sup>       | <10 <sup>6</sup>     | <10 <sup>6</sup>       |                  |                  |
|                 |                      | Downgrade in security category | <10 <sup>6</sup>                   | <10 <sup>6</sup>       | <10 <sup>6</sup>     | <10 <sup>6</sup>       | <10 <sup>6</sup>     | <10 <sup>6</sup>       | <10 <sup>6</sup>     | <10 <sup>6</sup>       |                  |                  |
|                 |                      | Internal Cell Move             | <10 <sup>6</sup>                   | <10 <sup>6</sup>       | <10 <sup>6</sup>     | <10 <sup>6</sup>       | <10 <sup>6</sup>     | <10 <sup>6</sup>       | <10 <sup>6</sup>     | <10 <sup>6</sup>       |                  |                  |
|                 |                      | Judges Remand                  | <10 <sup>6</sup>                   | <10 <sup>6</sup>       | <10 <sup>6</sup>     | <10 <sup>6</sup>       | <10 <sup>6</sup>     | <10 <sup>6</sup>       | <10 <sup>6</sup>     | <10 <sup>6</sup>       |                  |                  |
|                 |                      | Licence Revoke                 | 125                                | <10 <sup>6</sup>       | <10 <sup>6</sup>     | <10 <sup>6</sup>       | <10 <sup>6</sup>     | <10 <sup>6</sup>       | <10 <sup>6</sup>     | <10 <sup>6</sup>       |                  |                  |
|                 |                      | On Remand                      | 1,059                              | <10 <sup>6</sup>       | <10 <sup>6</sup>     | <10 <sup>6</sup>       | <10 <sup>6</sup>     | <10 <sup>6</sup>       | <10 <sup>6</sup>     | <10 <sup>6</sup>       |                  |                  |
|                 |                      | Transfer                       | 518                                | <10 <sup>6</sup>       | <10 <sup>6</sup>     | <10 <sup>6</sup>       | <10 <sup>6</sup>     | <10 <sup>6</sup>       | <10 <sup>6</sup>     | <10 <sup>6</sup>       |                  |                  |
|                 |                      | Upgrade in security category   | <10 <sup>6</sup>                   | <10 <sup>6</sup>       | <10 <sup>6</sup>     | <10 <sup>6</sup>       | <10 <sup>6</sup>     | <10 <sup>6</sup>       | <10 <sup>6</sup>     | <10 <sup>6</sup>       |                  |                  |
| 2019/20         |                      | .                              | 69                                 | <10 <sup>6</sup>       | <10 <sup>6</sup>     | <10 <sup>6</sup>       | <10 <sup>6</sup>     | <10 <sup>6</sup>       | <10 <sup>6</sup>     | <10 <sup>6</sup>       | <10 <sup>6</sup> |                  |
|                 |                      |                                | Abandoned                          | <10 <sup>6</sup>       | <10 <sup>6</sup>     | <10 <sup>6</sup>       | <10 <sup>6</sup>     | <10 <sup>6</sup>       | <10 <sup>6</sup>     | <10 <sup>6</sup>       | <10 <sup>6</sup> |                  |
|                 |                      |                                | Active In                          | 22,424                 | 10 (0.0)             | <10 <sup>6</sup>       | <10 <sup>6</sup>     | <10 <sup>6</sup>       | <10 <sup>6</sup>     | <10 <sup>6</sup>       | <10 <sup>6</sup> |                  |
|                 |                      | Active Out                     | 625                                | <10 <sup>6</sup>       | <10 <sup>6</sup>     | <10 <sup>6</sup>       | <10 <sup>6</sup>     | <10 <sup>6</sup>       | <10 <sup>6</sup>     | <10 <sup>6</sup>       |                  |                  |
|                 |                      | Convicted Sentence             | 1,361                              | <10 <sup>6</sup>       | <10 <sup>6</sup>     | <10 <sup>6</sup>       | <10 <sup>6</sup>     | <10 <sup>6</sup>       | <10 <sup>6</sup>     | <10 <sup>6</sup>       |                  |                  |
|                 |                      | Downgrade in security category | <10 <sup>6</sup>                   | <10 <sup>6</sup>       | <10 <sup>6</sup>     | <10 <sup>6</sup>       | <10 <sup>6</sup>     | <10 <sup>6</sup>       | <10 <sup>6</sup>     | <10 <sup>6</sup>       |                  |                  |
|                 |                      | Internal Cell Move             | <10 <sup>6</sup>                   | <10 <sup>6</sup>       | <10 <sup>6</sup>     | <10 <sup>6</sup>       | <10 <sup>6</sup>     | <10 <sup>6</sup>       | <10 <sup>6</sup>     | <10 <sup>6</sup>       |                  |                  |
|                 |                      | Judges Remand                  | 19                                 | <10 <sup>6</sup>       | <10 <sup>6</sup>     | <10 <sup>6</sup>       | <10 <sup>6</sup>     | <10 <sup>6</sup>       | <10 <sup>6</sup>     | <10 <sup>6</sup>       |                  |                  |
|                 |                      | Licence Revoke                 | 178                                | <10 <sup>6</sup>       | <10 <sup>6</sup>     | <10 <sup>6</sup>       | <10 <sup>6</sup>     | <10 <sup>6</sup>       | <10 <sup>6</sup>     | <10 <sup>6</sup>       |                  |                  |
|                 |                      | On Remand                      | 1,031                              | <10 <sup>6</sup>       | <10 <sup>6</sup>     | <10 <sup>6</sup>       | <10 <sup>6</sup>     | <10 <sup>6</sup>       | <10 <sup>6</sup>     | <10 <sup>6</sup>       |                  |                  |
|                 |                      | Transfer                       | 101                                | <10 <sup>6</sup>       | <10 <sup>6</sup>     | <10 <sup>6</sup>       | <10 <sup>6</sup>     | <10 <sup>6</sup>       | <10 <sup>6</sup>     | <10 <sup>6</sup>       |                  |                  |
|                 |                      | Upgrade in security category   | <10 <sup>6</sup>                   | <10 <sup>6</sup>       | <10 <sup>6</sup>     | <10 <sup>6</sup>       | <10 <sup>6</sup>     | <10 <sup>6</sup>       | <10 <sup>6</sup>     | <10 <sup>6</sup>       |                  |                  |
|                 | Age - years          |                                |                                    |                        |                      |                        |                      |                        |                      |                        |                  |                  |
|                 |                      | 2017/18                        | 10 - <20                           | 468                    | <10 <sup>6</sup>     | <10 <sup>6</sup>       | <10 <sup>6</sup>     | <10 <sup>6</sup>       | <10 <sup>6</sup>     | <10 <sup>6</sup>       | <10 <sup>6</sup> | <10 <sup>6</sup> |
|                 |                      |                                | 20 - <30                           | 6,994                  | <10 <sup>6</sup>     | <10 <sup>6</sup>       | <10 <sup>6</sup>     | <10 <sup>6</sup>       | <10 <sup>6</sup>     | <10 <sup>6</sup>       | <10 <sup>6</sup> | <10 <sup>6</sup> |
|                 |                      | 30 - <40                       | 7,051                              | <10 <sup>6</sup>       | <10 <sup>6</sup>     | <10 <sup>6</sup>       | <10 <sup>6</sup>     | <10 <sup>6</sup>       | <10 <sup>6</sup>     | <10 <sup>6</sup>       |                  |                  |
|                 |                      | 40 - <50                       | 4,114                              | <10 <sup>6</sup>       | <10 <sup>6</sup>     | <10 <sup>6</sup>       | <10 <sup>6</sup>     | <10 <sup>6</sup>       | <10 <sup>6</sup>     | <10 <sup>6</sup>       |                  |                  |
|                 |                      | 50 - <60                       | 2,107                              | <10 <sup>6</sup>       | <10 <sup>6</sup>     | <10 <sup>6</sup>       | <10 <sup>6</sup>     | <10 <sup>6</sup>       | <10 <sup>6</sup>     | <10 <sup>6</sup>       |                  |                  |
|                 |                      | 60 - <70                       | 684                                | <10 <sup>6</sup>       | <10 <sup>6</sup>     | <10 <sup>6</sup>       | <10 <sup>6</sup>     | <10 <sup>6</sup>       | <10 <sup>6</sup>     | <10 <sup>6</sup>       |                  |                  |
|                 |                      | 70 - <80                       | 213                                | <10 <sup>6</sup>       | <10 <sup>6</sup>     | <10 <sup>6</sup>       | <10 <sup>6</sup>     | <10 <sup>6</sup>       | <10 <sup>6</sup>     | <10 <sup>6</sup>       |                  |                  |
|                 |                      | 80 - <90                       | 40                                 | <10 <sup>6</sup>       | <10 <sup>6</sup>     | <10 <sup>6</sup>       | <10 <sup>6</sup>     | <10 <sup>6</sup>       | <10 <sup>6</sup>     | <10 <sup>6</sup>       |                  |                  |
|                 |                      | 90 - <100                      | <10 <sup>6</sup>                   | <10 <sup>6</sup>       | <10 <sup>6</sup>     | <10 <sup>6</sup>       | <10 <sup>6</sup>     | <10 <sup>6</sup>       | <10 <sup>6</sup>     | <10 <sup>6</sup>       |                  |                  |
|                 | 100 - <110           | <10 <sup>6</sup>               | <10 <sup>6</sup>                   | <10 <sup>6</sup>       | <10 <sup>6</sup>     | <10 <sup>6</sup>       | <10 <sup>6</sup>     | <10 <sup>6</sup>       | <10 <sup>6</sup>     |                        |                  |                  |

<sup>1</sup>Eligible for indicator; <sup>2</sup>Achieve in current prison; <sup>3</sup>Achieve in previous prison; <sup>4</sup>Overall achievement - either current or previous prison; <sup>5</sup>Declined indicator; <sup>6</sup>Suppressed (<10) to avoid disclosure

The proportion of people with a new diagnosis of any form of dementia in the reporting year, and who have a record of the following blood tests between 12 months before and 6 months after the date of diagnosis: full blood count, calcium, glucose and/or HbA1C, urea and electrolytes, liver function, thyroid function, serum vitamin B12, folate levels

no comparable data in QOF 2019/20. Most recent QOF data was from 2018/19 and achievement was 70.01%

| Indicator                      | Group: Mental health           |                                    |                      |                        |                      |                        |                      |                        |                  |
|--------------------------------|--------------------------------|------------------------------------|----------------------|------------------------|----------------------|------------------------|----------------------|------------------------|------------------|
|                                | Variable                       | Eligible <sup>1</sup><br>(% popIn) | Thyroid (% eligible) |                        | Serum (% eligible)   |                        | Folate (% eligible)  |                        |                  |
|                                |                                |                                    | Satisfy <sup>2</sup> | Elsewhere <sup>3</sup> | Satisfy <sup>2</sup> | Elsewhere <sup>3</sup> | Satisfy <sup>2</sup> | Elsewhere <sup>3</sup> |                  |
| 2019/20                        | A                              | <10 <sup>o</sup>                   | <10 <sup>6</sup>     | <10 <sup>6</sup>       | <10 <sup>6</sup>     | <10 <sup>6</sup>       | <10 <sup>6</sup>     | <10 <sup>6</sup>       |                  |
|                                | B                              | <10 <sup>o</sup>                   | <10 <sup>6</sup>     | <10 <sup>6</sup>       | <10 <sup>6</sup>     | <10 <sup>6</sup>       | <10 <sup>6</sup>     | <10 <sup>6</sup>       |                  |
|                                | C                              | <10 <sup>o</sup>                   | <10 <sup>6</sup>     | <10 <sup>6</sup>       | <10 <sup>6</sup>     | <10 <sup>6</sup>       | <10 <sup>6</sup>     | <10 <sup>6</sup>       |                  |
|                                | Closed                         | <10 <sup>o</sup>                   | <10 <sup>6</sup>     | <10 <sup>6</sup>       | <10 <sup>6</sup>     | <10 <sup>6</sup>       | <10 <sup>6</sup>     | <10 <sup>6</sup>       |                  |
|                                | D                              | <10 <sup>o</sup>                   | <10 <sup>6</sup>     | <10 <sup>6</sup>       | <10 <sup>6</sup>     | <10 <sup>6</sup>       | <10 <sup>6</sup>     | <10 <sup>6</sup>       |                  |
|                                | YOI                            | <10 <sup>o</sup>                   | <10 <sup>6</sup>     | <10 <sup>6</sup>       | <10 <sup>6</sup>     | <10 <sup>6</sup>       | <10 <sup>6</sup>     | <10 <sup>6</sup>       |                  |
| Gender                         |                                |                                    |                      |                        |                      |                        |                      |                        |                  |
|                                | 2017/18                        |                                    |                      |                        |                      |                        |                      |                        |                  |
| 2017/18                        | F                              | <10 <sup>o</sup>                   | <10 <sup>6</sup>     | <10 <sup>6</sup>       | <10 <sup>6</sup>     | <10 <sup>6</sup>       | <10 <sup>6</sup>     | <10 <sup>6</sup>       |                  |
|                                | M                              | 10                                 | <10 <sup>6</sup>     | <10 <sup>6</sup>       | <10 <sup>6</sup>     | <10 <sup>6</sup>       | <10 <sup>6</sup>     | <10 <sup>6</sup>       |                  |
| 2018/19                        | F                              | <10 <sup>o</sup>                   | <10 <sup>6</sup>     | <10 <sup>6</sup>       | <10 <sup>6</sup>     | <10 <sup>6</sup>       | <10 <sup>6</sup>     | <10 <sup>6</sup>       |                  |
|                                | M                              | 10                                 | <10 <sup>6</sup>     | <10 <sup>6</sup>       | <10 <sup>6</sup>     | <10 <sup>6</sup>       | <10 <sup>6</sup>     | <10 <sup>6</sup>       |                  |
| 2019/20                        | F                              | <10 <sup>o</sup>                   | <10 <sup>6</sup>     | <10 <sup>6</sup>       | <10 <sup>6</sup>     | <10 <sup>6</sup>       | <10 <sup>6</sup>     | <10 <sup>6</sup>       |                  |
|                                | M                              | 12                                 | <10 <sup>6</sup>     | <10 <sup>6</sup>       | <10 <sup>6</sup>     | <10 <sup>6</sup>       | <10 <sup>6</sup>     | <10 <sup>6</sup>       |                  |
| Sentence Status                |                                |                                    |                      |                        |                      |                        |                      |                        |                  |
|                                | 2017/18                        |                                    |                      |                        |                      |                        |                      |                        |                  |
| 2017/18                        | .                              | <10 <sup>o</sup>                   | <10 <sup>6</sup>     | <10 <sup>6</sup>       | <10 <sup>6</sup>     | <10 <sup>6</sup>       | <10 <sup>6</sup>     | <10 <sup>6</sup>       |                  |
|                                | Absconded                      | <10 <sup>o</sup>                   | <10 <sup>6</sup>     | <10 <sup>6</sup>       | <10 <sup>6</sup>     | <10 <sup>6</sup>       | <10 <sup>6</sup>     | <10 <sup>6</sup>       |                  |
|                                | Active In                      | <10 <sup>o</sup>                   | <10 <sup>6</sup>     | <10 <sup>6</sup>       | <10 <sup>6</sup>     | <10 <sup>6</sup>       | <10 <sup>6</sup>     | <10 <sup>6</sup>       |                  |
|                                | Active Out                     | <10 <sup>o</sup>                   | <10 <sup>6</sup>     | <10 <sup>6</sup>       | <10 <sup>6</sup>     | <10 <sup>6</sup>       | <10 <sup>6</sup>     | <10 <sup>6</sup>       |                  |
|                                | Convicted Sentence             | <10 <sup>o</sup>                   | <10 <sup>6</sup>     | <10 <sup>6</sup>       | <10 <sup>6</sup>     | <10 <sup>6</sup>       | <10 <sup>6</sup>     | <10 <sup>6</sup>       |                  |
|                                | Downgrade in security category | <10 <sup>o</sup>                   | <10 <sup>6</sup>     | <10 <sup>6</sup>       | <10 <sup>6</sup>     | <10 <sup>6</sup>       | <10 <sup>6</sup>     | <10 <sup>6</sup>       |                  |
|                                | Internal Cell Move             | <10 <sup>o</sup>                   | <10 <sup>6</sup>     | <10 <sup>6</sup>       | <10 <sup>6</sup>     | <10 <sup>6</sup>       | <10 <sup>6</sup>     | <10 <sup>6</sup>       |                  |
|                                | Judges Remand                  | <10 <sup>o</sup>                   | <10 <sup>6</sup>     | <10 <sup>6</sup>       | <10 <sup>6</sup>     | <10 <sup>6</sup>       | <10 <sup>6</sup>     | <10 <sup>6</sup>       |                  |
|                                | Licence Revoke                 | <10 <sup>o</sup>                   | <10 <sup>6</sup>     | <10 <sup>6</sup>       | <10 <sup>6</sup>     | <10 <sup>6</sup>       | <10 <sup>6</sup>     | <10 <sup>6</sup>       |                  |
|                                | On Remand                      | <10 <sup>o</sup>                   | <10 <sup>6</sup>     | <10 <sup>6</sup>       | <10 <sup>6</sup>     | <10 <sup>6</sup>       | <10 <sup>6</sup>     | <10 <sup>6</sup>       |                  |
|                                | Transfer                       | <10 <sup>o</sup>                   | <10 <sup>6</sup>     | <10 <sup>6</sup>       | <10 <sup>6</sup>     | <10 <sup>6</sup>       | <10 <sup>6</sup>     | <10 <sup>6</sup>       |                  |
|                                | Upgrade in security category   | <10 <sup>o</sup>                   | <10 <sup>6</sup>     | <10 <sup>6</sup>       | <10 <sup>6</sup>     | <10 <sup>6</sup>       | <10 <sup>6</sup>     | <10 <sup>6</sup>       |                  |
|                                | 2018/19                        | .                                  | <10 <sup>o</sup>     | <10 <sup>6</sup>       | <10 <sup>6</sup>     | <10 <sup>6</sup>       | <10 <sup>6</sup>     | <10 <sup>6</sup>       |                  |
|                                | Absconded                      | <10 <sup>o</sup>                   | <10 <sup>6</sup>     | <10 <sup>6</sup>       | <10 <sup>6</sup>     | <10 <sup>6</sup>       | <10 <sup>6</sup>     | <10 <sup>6</sup>       |                  |
|                                | Active In                      | <10 <sup>o</sup>                   | <10 <sup>6</sup>     | <10 <sup>6</sup>       | <10 <sup>6</sup>     | <10 <sup>6</sup>       | <10 <sup>6</sup>     | <10 <sup>6</sup>       |                  |
| Active Out                     | <10 <sup>o</sup>               | <10 <sup>6</sup>                   | <10 <sup>6</sup>     | <10 <sup>6</sup>       | <10 <sup>6</sup>     | <10 <sup>6</sup>       | <10 <sup>6</sup>     |                        |                  |
| Convicted Sentence             | <10 <sup>o</sup>               | <10 <sup>6</sup>                   | <10 <sup>6</sup>     | <10 <sup>6</sup>       | <10 <sup>6</sup>     | <10 <sup>6</sup>       | <10 <sup>6</sup>     |                        |                  |
| Downgrade in security category | <10 <sup>o</sup>               | <10 <sup>6</sup>                   | <10 <sup>6</sup>     | <10 <sup>6</sup>       | <10 <sup>6</sup>     | <10 <sup>6</sup>       | <10 <sup>6</sup>     |                        |                  |
| Internal Cell Move             | <10 <sup>o</sup>               | <10 <sup>6</sup>                   | <10 <sup>6</sup>     | <10 <sup>6</sup>       | <10 <sup>6</sup>     | <10 <sup>6</sup>       | <10 <sup>6</sup>     |                        |                  |
| Judges Remand                  | <10 <sup>o</sup>               | <10 <sup>6</sup>                   | <10 <sup>6</sup>     | <10 <sup>6</sup>       | <10 <sup>6</sup>     | <10 <sup>6</sup>       | <10 <sup>6</sup>     |                        |                  |
| Licence Revoke                 | <10 <sup>o</sup>               | <10 <sup>6</sup>                   | <10 <sup>6</sup>     | <10 <sup>6</sup>       | <10 <sup>6</sup>     | <10 <sup>6</sup>       | <10 <sup>6</sup>     |                        |                  |
| On Remand                      | <10 <sup>o</sup>               | <10 <sup>6</sup>                   | <10 <sup>6</sup>     | <10 <sup>6</sup>       | <10 <sup>6</sup>     | <10 <sup>6</sup>       | <10 <sup>6</sup>     |                        |                  |
| Transfer                       | <10 <sup>o</sup>               | <10 <sup>6</sup>                   | <10 <sup>6</sup>     | <10 <sup>6</sup>       | <10 <sup>6</sup>     | <10 <sup>6</sup>       | <10 <sup>6</sup>     |                        |                  |
| Upgrade in security category   | <10 <sup>o</sup>               | <10 <sup>6</sup>                   | <10 <sup>6</sup>     | <10 <sup>6</sup>       | <10 <sup>6</sup>     | <10 <sup>6</sup>       | <10 <sup>6</sup>     |                        |                  |
| 2019/20                        | .                              | <10 <sup>o</sup>                   | <10 <sup>6</sup>     | <10 <sup>6</sup>       | <10 <sup>6</sup>     | <10 <sup>6</sup>       | <10 <sup>6</sup>     | <10 <sup>6</sup>       |                  |
|                                | Absconded                      | <10 <sup>o</sup>                   | <10 <sup>6</sup>     | <10 <sup>6</sup>       | <10 <sup>6</sup>     | <10 <sup>6</sup>       | <10 <sup>6</sup>     | <10 <sup>6</sup>       |                  |
|                                | Active In                      | <10 <sup>o</sup>                   | <10 <sup>6</sup>     | <10 <sup>6</sup>       | <10 <sup>6</sup>     | <10 <sup>6</sup>       | <10 <sup>6</sup>     | <10 <sup>6</sup>       |                  |
|                                | Active Out                     | <10 <sup>o</sup>                   | <10 <sup>6</sup>     | <10 <sup>6</sup>       | <10 <sup>6</sup>     | <10 <sup>6</sup>       | <10 <sup>6</sup>     | <10 <sup>6</sup>       |                  |
|                                | Convicted Sentence             | <10 <sup>o</sup>                   | <10 <sup>6</sup>     | <10 <sup>6</sup>       | <10 <sup>6</sup>     | <10 <sup>6</sup>       | <10 <sup>6</sup>     | <10 <sup>6</sup>       |                  |
|                                | Downgrade in security category | <10 <sup>o</sup>                   | <10 <sup>6</sup>     | <10 <sup>6</sup>       | <10 <sup>6</sup>     | <10 <sup>6</sup>       | <10 <sup>6</sup>     | <10 <sup>6</sup>       |                  |
|                                | Internal Cell Move             | <10 <sup>o</sup>                   | <10 <sup>6</sup>     | <10 <sup>6</sup>       | <10 <sup>6</sup>     | <10 <sup>6</sup>       | <10 <sup>6</sup>     | <10 <sup>6</sup>       |                  |
|                                | Judges Remand                  | <10 <sup>o</sup>                   | <10 <sup>6</sup>     | <10 <sup>6</sup>       | <10 <sup>6</sup>     | <10 <sup>6</sup>       | <10 <sup>6</sup>     | <10 <sup>6</sup>       |                  |
|                                | Licence Revoke                 | <10 <sup>o</sup>                   | <10 <sup>6</sup>     | <10 <sup>6</sup>       | <10 <sup>6</sup>     | <10 <sup>6</sup>       | <10 <sup>6</sup>     | <10 <sup>6</sup>       |                  |
|                                | On Remand                      | <10 <sup>o</sup>                   | <10 <sup>6</sup>     | <10 <sup>6</sup>       | <10 <sup>6</sup>     | <10 <sup>6</sup>       | <10 <sup>6</sup>     | <10 <sup>6</sup>       |                  |
|                                | Transfer                       | <10 <sup>o</sup>                   | <10 <sup>6</sup>     | <10 <sup>6</sup>       | <10 <sup>6</sup>     | <10 <sup>6</sup>       | <10 <sup>6</sup>     | <10 <sup>6</sup>       |                  |
|                                | Upgrade in security category   | <10 <sup>o</sup>                   | <10 <sup>6</sup>     | <10 <sup>6</sup>       | <10 <sup>6</sup>     | <10 <sup>6</sup>       | <10 <sup>6</sup>     | <10 <sup>6</sup>       |                  |
|                                | Age - years                    |                                    |                      |                        |                      |                        |                      |                        |                  |
|                                |                                | 2017/18                            |                      |                        |                      |                        |                      |                        |                  |
|                                | 2017/18                        | 10 - <20                           | <10 <sup>o</sup>     | <10 <sup>6</sup>       | <10 <sup>6</sup>     | <10 <sup>6</sup>       | <10 <sup>6</sup>     | <10 <sup>6</sup>       | <10 <sup>6</sup> |
| 20 - <30                       |                                | <10 <sup>o</sup>                   | <10 <sup>6</sup>     | <10 <sup>6</sup>       | <10 <sup>6</sup>     | <10 <sup>6</sup>       | <10 <sup>6</sup>     | <10 <sup>6</sup>       |                  |
| 30 - <40                       |                                | <10 <sup>o</sup>                   | <10 <sup>6</sup>     | <10 <sup>6</sup>       | <10 <sup>6</sup>     | <10 <sup>6</sup>       | <10 <sup>6</sup>     | <10 <sup>6</sup>       |                  |
| 40 - <50                       |                                | <10 <sup>o</sup>                   | <10 <sup>6</sup>     | <10 <sup>6</sup>       | <10 <sup>6</sup>     | <10 <sup>6</sup>       | <10 <sup>6</sup>     | <10 <sup>6</sup>       |                  |
| 50 - <60                       |                                | <10 <sup>o</sup>                   | <10 <sup>6</sup>     | <10 <sup>6</sup>       | <10 <sup>6</sup>     | <10 <sup>6</sup>       | <10 <sup>6</sup>     | <10 <sup>6</sup>       |                  |
| 60 - <70                       |                                | <10 <sup>o</sup>                   | <10 <sup>6</sup>     | <10 <sup>6</sup>       | <10 <sup>6</sup>     | <10 <sup>6</sup>       | <10 <sup>6</sup>     | <10 <sup>6</sup>       |                  |
| 70 - <80                       |                                | <10 <sup>o</sup>                   | <10 <sup>6</sup>     | <10 <sup>6</sup>       | <10 <sup>6</sup>     | <10 <sup>6</sup>       | <10 <sup>6</sup>     | <10 <sup>6</sup>       |                  |
| 80 - <90                       |                                | <10 <sup>o</sup>                   | <10 <sup>6</sup>     | <10 <sup>6</sup>       | <10 <sup>6</sup>     | <10 <sup>6</sup>       | <10 <sup>6</sup>     | <10 <sup>6</sup>       |                  |
| 90 - <100                      |                                | <10 <sup>o</sup>                   | <10 <sup>6</sup>     | <10 <sup>6</sup>       | <10 <sup>6</sup>     | <10 <sup>6</sup>       | <10 <sup>6</sup>     | <10 <sup>6</sup>       |                  |
| 100 - <110                     |                                | <10 <sup>o</sup>                   | <10 <sup>6</sup>     | <10 <sup>6</sup>       | <10 <sup>6</sup>     | <10 <sup>6</sup>       | <10 <sup>6</sup>     | <10 <sup>6</sup>       |                  |

<sup>1</sup>Eligible for indicator; <sup>2</sup>Achieve in current prison; <sup>3</sup>Achieve in previous prison; <sup>4</sup>Overall achievement - either current or previous prison; <sup>5</sup>Declined indicator; <sup>6</sup>Suppressed (<10) to avoid disclosure

The proportion of people with a new diagnosis of any form of dementia in the reporting year, and who have a record of the following blood tests between 12 months before and 6 months after the date of diagnosis: full blood count, calcium, glucose and/or HbA1C, urea and electrolytes, liver function, thyroid function, serum vitamin B12, folate levels

no comparable data in QOF 2019/20. Most recent QOF data was from 2018/19 and achievement was 70.01%

| Indicator                      | Group: Mental health   |                  |                                    |                        |                      |                        |                      |                        |                      |                        |                  |
|--------------------------------|------------------------|------------------|------------------------------------|------------------------|----------------------|------------------------|----------------------|------------------------|----------------------|------------------------|------------------|
|                                | Variable               | Population       | Eligible <sup>1</sup><br>(% popln) | FBC (% eligible)       |                      | Calcium (% eligible)   |                      | Hb1Ac (% eligible)     |                      | Renal (% eligible)     |                  |
|                                |                        |                  | Satisfy <sup>2</sup>               | Elsewhere <sup>3</sup> | Satisfy <sup>2</sup> | Elsewhere <sup>3</sup> | Satisfy <sup>2</sup> | Elsewhere <sup>3</sup> | Satisfy <sup>2</sup> | Elsewhere <sup>3</sup> |                  |
| 2018/19                        | 10 - <20               | 436              | <10 <sup>6</sup>                   | <10 <sup>6</sup>       | <10 <sup>6</sup>     | <10 <sup>6</sup>       | <10 <sup>6</sup>     | <10 <sup>6</sup>       | <10 <sup>6</sup>     | <10 <sup>6</sup>       | <10 <sup>6</sup> |
|                                | 20 - <30               | 7,163            | <10 <sup>6</sup>                   | <10 <sup>6</sup>       | <10 <sup>6</sup>     | <10 <sup>6</sup>       | <10 <sup>6</sup>     | <10 <sup>6</sup>       | <10 <sup>6</sup>     | <10 <sup>6</sup>       | <10 <sup>6</sup> |
|                                | 30 - <40               | 7,381            | <10 <sup>6</sup>                   | <10 <sup>6</sup>       | <10 <sup>6</sup>     | <10 <sup>6</sup>       | <10 <sup>6</sup>     | <10 <sup>6</sup>       | <10 <sup>6</sup>     | <10 <sup>6</sup>       | <10 <sup>6</sup> |
|                                | 40 - <50               | 4,180            | <10 <sup>6</sup>                   | <10 <sup>6</sup>       | <10 <sup>6</sup>     | <10 <sup>6</sup>       | <10 <sup>6</sup>     | <10 <sup>6</sup>       | <10 <sup>6</sup>     | <10 <sup>6</sup>       | <10 <sup>6</sup> |
|                                | 50 - <60               | 1,978            | <10 <sup>6</sup>                   | <10 <sup>6</sup>       | <10 <sup>6</sup>     | <10 <sup>6</sup>       | <10 <sup>6</sup>     | <10 <sup>6</sup>       | <10 <sup>6</sup>     | <10 <sup>6</sup>       | <10 <sup>6</sup> |
|                                | 60 - <70               | 701              | <10 <sup>6</sup>                   | <10 <sup>6</sup>       | <10 <sup>6</sup>     | <10 <sup>6</sup>       | <10 <sup>6</sup>     | <10 <sup>6</sup>       | <10 <sup>6</sup>     | <10 <sup>6</sup>       | <10 <sup>6</sup> |
|                                | 70 - <80               | 209              | <10 <sup>6</sup>                   | <10 <sup>6</sup>       | <10 <sup>6</sup>     | <10 <sup>6</sup>       | <10 <sup>6</sup>     | <10 <sup>6</sup>       | <10 <sup>6</sup>     | <10 <sup>6</sup>       | <10 <sup>6</sup> |
|                                | 80 - <90               | 45               | <10 <sup>6</sup>                   | <10 <sup>6</sup>       | <10 <sup>6</sup>     | <10 <sup>6</sup>       | <10 <sup>6</sup>     | <10 <sup>6</sup>       | <10 <sup>6</sup>     | <10 <sup>6</sup>       | <10 <sup>6</sup> |
|                                | 90 - <100              | <10 <sup>0</sup> | <10 <sup>6</sup>                   | <10 <sup>6</sup>       | <10 <sup>6</sup>     | <10 <sup>6</sup>       | <10 <sup>6</sup>     | <10 <sup>6</sup>       | <10 <sup>6</sup>     | <10 <sup>6</sup>       | <10 <sup>6</sup> |
|                                | 100 - <110             | <10 <sup>0</sup> | <10 <sup>6</sup>                   | <10 <sup>6</sup>       | <10 <sup>6</sup>     | <10 <sup>6</sup>       | <10 <sup>6</sup>     | <10 <sup>6</sup>       | <10 <sup>6</sup>     | <10 <sup>6</sup>       | <10 <sup>6</sup> |
| 2019/20                        | 10 - <20               | 404              | <10 <sup>6</sup>                   | <10 <sup>6</sup>       | <10 <sup>6</sup>     | <10 <sup>6</sup>       | <10 <sup>6</sup>     | <10 <sup>6</sup>       | <10 <sup>6</sup>     | <10 <sup>6</sup>       | <10 <sup>6</sup> |
|                                | 20 - <30               | 8,064            | <10 <sup>6</sup>                   | <10 <sup>6</sup>       | <10 <sup>6</sup>     | <10 <sup>6</sup>       | <10 <sup>6</sup>     | <10 <sup>6</sup>       | <10 <sup>6</sup>     | <10 <sup>6</sup>       | <10 <sup>6</sup> |
|                                | 30 - <40               | 9,125            | <10 <sup>6</sup>                   | <10 <sup>6</sup>       | <10 <sup>6</sup>     | <10 <sup>6</sup>       | <10 <sup>6</sup>     | <10 <sup>6</sup>       | <10 <sup>6</sup>     | <10 <sup>6</sup>       | <10 <sup>6</sup> |
|                                | 40 - <50               | 4,948            | <10 <sup>6</sup>                   | <10 <sup>6</sup>       | <10 <sup>6</sup>     | <10 <sup>6</sup>       | <10 <sup>6</sup>     | <10 <sup>6</sup>       | <10 <sup>6</sup>     | <10 <sup>6</sup>       | <10 <sup>6</sup> |
|                                | 50 - <60               | 2,224            | <10 <sup>6</sup>                   | <10 <sup>6</sup>       | <10 <sup>6</sup>     | <10 <sup>6</sup>       | <10 <sup>6</sup>     | <10 <sup>6</sup>       | <10 <sup>6</sup>     | <10 <sup>6</sup>       | <10 <sup>6</sup> |
|                                | 60 - <70               | 751              | <10 <sup>6</sup>                   | <10 <sup>6</sup>       | <10 <sup>6</sup>     | <10 <sup>6</sup>       | <10 <sup>6</sup>     | <10 <sup>6</sup>       | <10 <sup>6</sup>     | <10 <sup>6</sup>       | <10 <sup>6</sup> |
|                                | 70 - <80               | 238              | <10 <sup>6</sup>                   | <10 <sup>6</sup>       | <10 <sup>6</sup>     | <10 <sup>6</sup>       | <10 <sup>6</sup>     | <10 <sup>6</sup>       | <10 <sup>6</sup>     | <10 <sup>6</sup>       | <10 <sup>6</sup> |
|                                | 80 - <90               | 53               | <10 <sup>6</sup>                   | <10 <sup>6</sup>       | <10 <sup>6</sup>     | <10 <sup>6</sup>       | <10 <sup>6</sup>     | <10 <sup>6</sup>       | <10 <sup>6</sup>     | <10 <sup>6</sup>       | <10 <sup>6</sup> |
|                                | 90 - <100              | <10 <sup>0</sup> | <10 <sup>6</sup>                   | <10 <sup>6</sup>       | <10 <sup>6</sup>     | <10 <sup>6</sup>       | <10 <sup>6</sup>     | <10 <sup>6</sup>       | <10 <sup>6</sup>     | <10 <sup>6</sup>       | <10 <sup>6</sup> |
|                                | 100 - <110             | <10 <sup>0</sup> | <10 <sup>6</sup>                   | <10 <sup>6</sup>       | <10 <sup>6</sup>     | <10 <sup>6</sup>       | <10 <sup>6</sup>     | <10 <sup>6</sup>       | <10 <sup>6</sup>     | <10 <sup>6</sup>       | <10 <sup>6</sup> |
| <b>Length of Stay (months)</b> |                        |                  |                                    |                        |                      |                        |                      |                        |                      |                        |                  |
| 2017/18                        | <1                     | 4,474            | <10 <sup>6</sup>                   | <10 <sup>6</sup>       | <10 <sup>6</sup>     | <10 <sup>6</sup>       | <10 <sup>6</sup>     | <10 <sup>6</sup>       | <10 <sup>6</sup>     | <10 <sup>6</sup>       | <10 <sup>6</sup> |
|                                | 1-<6                   | 8,075            | <10 <sup>6</sup>                   | <10 <sup>6</sup>       | <10 <sup>6</sup>     | <10 <sup>6</sup>       | <10 <sup>6</sup>     | <10 <sup>6</sup>       | <10 <sup>6</sup>     | <10 <sup>6</sup>       | <10 <sup>6</sup> |
|                                | 6-<12                  | 3,672            | <10 <sup>6</sup>                   | <10 <sup>6</sup>       | <10 <sup>6</sup>     | <10 <sup>6</sup>       | <10 <sup>6</sup>     | <10 <sup>6</sup>       | <10 <sup>6</sup>     | <10 <sup>6</sup>       | <10 <sup>6</sup> |
|                                | 12-<24                 | 2,832            | <10 <sup>6</sup>                   | <10 <sup>6</sup>       | <10 <sup>6</sup>     | <10 <sup>6</sup>       | <10 <sup>6</sup>     | <10 <sup>6</sup>       | <10 <sup>6</sup>     | <10 <sup>6</sup>       | <10 <sup>6</sup> |
|                                | 24+                    | 2,624            | <10 <sup>6</sup>                   | <10 <sup>6</sup>       | <10 <sup>6</sup>     | <10 <sup>6</sup>       | <10 <sup>6</sup>     | <10 <sup>6</sup>       | <10 <sup>6</sup>     | <10 <sup>6</sup>       | <10 <sup>6</sup> |
| 2018/19                        | <1                     | 4,801            | <10 <sup>6</sup>                   | <10 <sup>6</sup>       | <10 <sup>6</sup>     | <10 <sup>6</sup>       | <10 <sup>6</sup>     | <10 <sup>6</sup>       | <10 <sup>6</sup>     | <10 <sup>6</sup>       | <10 <sup>6</sup> |
|                                | 1-<6                   | 7,742            | <10 <sup>6</sup>                   | <10 <sup>6</sup>       | <10 <sup>6</sup>     | <10 <sup>6</sup>       | <10 <sup>6</sup>     | <10 <sup>6</sup>       | <10 <sup>6</sup>     | <10 <sup>6</sup>       | <10 <sup>6</sup> |
|                                | 6-<12                  | 3,616            | <10 <sup>6</sup>                   | <10 <sup>6</sup>       | <10 <sup>6</sup>     | <10 <sup>6</sup>       | <10 <sup>6</sup>     | <10 <sup>6</sup>       | <10 <sup>6</sup>     | <10 <sup>6</sup>       | <10 <sup>6</sup> |
|                                | 12-<24                 | 3,447            | <10 <sup>6</sup>                   | <10 <sup>6</sup>       | <10 <sup>6</sup>     | <10 <sup>6</sup>       | <10 <sup>6</sup>     | <10 <sup>6</sup>       | <10 <sup>6</sup>     | <10 <sup>6</sup>       | <10 <sup>6</sup> |
|                                | 24+                    | 2,493            | <10 <sup>6</sup>                   | <10 <sup>6</sup>       | <10 <sup>6</sup>     | <10 <sup>6</sup>       | <10 <sup>6</sup>     | <10 <sup>6</sup>       | <10 <sup>6</sup>     | <10 <sup>6</sup>       | <10 <sup>6</sup> |
| 2019/20                        | <1                     | 5,745            | <10 <sup>6</sup>                   | <10 <sup>6</sup>       | <10 <sup>6</sup>     | <10 <sup>6</sup>       | <10 <sup>6</sup>     | <10 <sup>6</sup>       | <10 <sup>6</sup>     | <10 <sup>6</sup>       | <10 <sup>6</sup> |
|                                | 1-<6                   | 9,697            | <10 <sup>6</sup>                   | <10 <sup>6</sup>       | <10 <sup>6</sup>     | <10 <sup>6</sup>       | <10 <sup>6</sup>     | <10 <sup>6</sup>       | <10 <sup>6</sup>     | <10 <sup>6</sup>       | <10 <sup>6</sup> |
|                                | 6-<12                  | 5,090            | <10 <sup>6</sup>                   | <10 <sup>6</sup>       | <10 <sup>6</sup>     | <10 <sup>6</sup>       | <10 <sup>6</sup>     | <10 <sup>6</sup>       | <10 <sup>6</sup>     | <10 <sup>6</sup>       | <10 <sup>6</sup> |
|                                | 12-<24                 | 3,244            | <10 <sup>6</sup>                   | <10 <sup>6</sup>       | <10 <sup>6</sup>     | <10 <sup>6</sup>       | <10 <sup>6</sup>     | <10 <sup>6</sup>       | <10 <sup>6</sup>     | <10 <sup>6</sup>       | <10 <sup>6</sup> |
|                                | 24+                    | 2,035            | <10 <sup>6</sup>                   | <10 <sup>6</sup>       | <10 <sup>6</sup>     | <10 <sup>6</sup>       | <10 <sup>6</sup>     | <10 <sup>6</sup>       | <10 <sup>6</sup>     | <10 <sup>6</sup>       | <10 <sup>6</sup> |
| <b>Ethnic Group</b>            |                        |                  |                                    |                        |                      |                        |                      |                        |                      |                        |                  |
| 2017/18                        | White                  | 15,638           | <10 <sup>6</sup>                   | <10 <sup>6</sup>       | <10 <sup>6</sup>     | <10 <sup>6</sup>       | <10 <sup>6</sup>     | <10 <sup>6</sup>       | <10 <sup>6</sup>     | <10 <sup>6</sup>       | <10 <sup>6</sup> |
|                                | Mixed                  | 431              | <10 <sup>6</sup>                   | <10 <sup>6</sup>       | <10 <sup>6</sup>     | <10 <sup>6</sup>       | <10 <sup>6</sup>     | <10 <sup>6</sup>       | <10 <sup>6</sup>     | <10 <sup>6</sup>       | <10 <sup>6</sup> |
|                                | Asian or Asian British | 813              | <10 <sup>6</sup>                   | <10 <sup>6</sup>       | <10 <sup>6</sup>     | <10 <sup>6</sup>       | <10 <sup>6</sup>     | <10 <sup>6</sup>       | <10 <sup>6</sup>     | <10 <sup>6</sup>       | <10 <sup>6</sup> |
|                                | Black or Black British | 404              | <10 <sup>6</sup>                   | <10 <sup>6</sup>       | <10 <sup>6</sup>     | <10 <sup>6</sup>       | <10 <sup>6</sup>     | <10 <sup>6</sup>       | <10 <sup>6</sup>     | <10 <sup>6</sup>       | <10 <sup>6</sup> |
|                                | Chinese and Other      | 214              | <10 <sup>6</sup>                   | <10 <sup>6</sup>       | <10 <sup>6</sup>     | <10 <sup>6</sup>       | <10 <sup>6</sup>     | <10 <sup>6</sup>       | <10 <sup>6</sup>     | <10 <sup>6</sup>       | <10 <sup>6</sup> |
|                                | Unclassified           | 372              | <10 <sup>6</sup>                   | <10 <sup>6</sup>       | <10 <sup>6</sup>     | <10 <sup>6</sup>       | <10 <sup>6</sup>     | <10 <sup>6</sup>       | <10 <sup>6</sup>     | <10 <sup>6</sup>       | <10 <sup>6</sup> |
| 2018/19                        | White                  | 14,911           | <10 <sup>6</sup>                   | <10 <sup>6</sup>       | <10 <sup>6</sup>     | <10 <sup>6</sup>       | <10 <sup>6</sup>     | <10 <sup>6</sup>       | <10 <sup>6</sup>     | <10 <sup>6</sup>       | <10 <sup>6</sup> |
|                                | Mixed                  | 371              | <10 <sup>6</sup>                   | <10 <sup>6</sup>       | <10 <sup>6</sup>     | <10 <sup>6</sup>       | <10 <sup>6</sup>     | <10 <sup>6</sup>       | <10 <sup>6</sup>     | <10 <sup>6</sup>       | <10 <sup>6</sup> |
|                                | Asian or Asian British | 726              | <10 <sup>6</sup>                   | <10 <sup>6</sup>       | <10 <sup>6</sup>     | <10 <sup>6</sup>       | <10 <sup>6</sup>     | <10 <sup>6</sup>       | <10 <sup>6</sup>     | <10 <sup>6</sup>       | <10 <sup>6</sup> |
|                                | Black or Black British | 364              | <10 <sup>6</sup>                   | <10 <sup>6</sup>       | <10 <sup>6</sup>     | <10 <sup>6</sup>       | <10 <sup>6</sup>     | <10 <sup>6</sup>       | <10 <sup>6</sup>     | <10 <sup>6</sup>       | <10 <sup>6</sup> |
|                                | Chinese and Other      | 167              | <10 <sup>6</sup>                   | <10 <sup>6</sup>       | <10 <sup>6</sup>     | <10 <sup>6</sup>       | <10 <sup>6</sup>     | <10 <sup>6</sup>       | <10 <sup>6</sup>     | <10 <sup>6</sup>       | <10 <sup>6</sup> |
|                                | Unclassified           | 409              | <10 <sup>6</sup>                   | <10 <sup>6</sup>       | <10 <sup>6</sup>     | <10 <sup>6</sup>       | <10 <sup>6</sup>     | <10 <sup>6</sup>       | <10 <sup>6</sup>     | <10 <sup>6</sup>       | <10 <sup>6</sup> |
| 2019/20                        | White                  | 16,606           | <10 <sup>6</sup>                   | <10 <sup>6</sup>       | <10 <sup>6</sup>     | <10 <sup>6</sup>       | <10 <sup>6</sup>     | <10 <sup>6</sup>       | <10 <sup>6</sup>     | <10 <sup>6</sup>       | <10 <sup>6</sup> |
|                                | Mixed                  | 409              | <10 <sup>6</sup>                   | <10 <sup>6</sup>       | <10 <sup>6</sup>     | <10 <sup>6</sup>       | <10 <sup>6</sup>     | <10 <sup>6</sup>       | <10 <sup>6</sup>     | <10 <sup>6</sup>       | <10 <sup>6</sup> |
|                                | Asian or Asian British | 755              | <10 <sup>6</sup>                   | <10 <sup>6</sup>       | <10 <sup>6</sup>     | <10 <sup>6</sup>       | <10 <sup>6</sup>     | <10 <sup>6</sup>       | <10 <sup>6</sup>     | <10 <sup>6</sup>       | <10 <sup>6</sup> |
|                                | Black or Black British | 451              | <10 <sup>6</sup>                   | <10 <sup>6</sup>       | <10 <sup>6</sup>     | <10 <sup>6</sup>       | <10 <sup>6</sup>     | <10 <sup>6</sup>       | <10 <sup>6</sup>     | <10 <sup>6</sup>       | <10 <sup>6</sup> |
|                                | Chinese and Other      | 163              | <10 <sup>6</sup>                   | <10 <sup>6</sup>       | <10 <sup>6</sup>     | <10 <sup>6</sup>       | <10 <sup>6</sup>     | <10 <sup>6</sup>       | <10 <sup>6</sup>     | <10 <sup>6</sup>       | <10 <sup>6</sup> |
|                                | Unclassified           | 387              | <10 <sup>6</sup>                   | <10 <sup>6</sup>       | <10 <sup>6</sup>     | <10 <sup>6</sup>       | <10 <sup>6</sup>     | <10 <sup>6</sup>       | <10 <sup>6</sup>     | <10 <sup>6</sup>       | <10 <sup>6</sup> |

<sup>1</sup>Eligible for indicator; <sup>2</sup>Achieve in current prison; <sup>3</sup>Achieve in previous prison; <sup>4</sup>Overall achievement - either current or previous prison; <sup>5</sup>Declined indicator; <sup>6</sup>Suppressed (<10) to avoid disclosure



The proportion of people with a new diagnosis of any form of dementia in the reporting year, and who have a record of the following blood tests between 12 months before and 6 months after the date of diagnosis: full blood count, calcium, glucose and/or HbA1C, urea and electrolytes, liver function, thyroid function, serum vitamin B12, folate levels

no comparable data in QOF 2019/20. Most recent QOF data was from 2018/19 and achievement was 70.01%

| Indicator                      | Group: Mental health   |                                    |                      |                        |                      |                        |                      |                        |
|--------------------------------|------------------------|------------------------------------|----------------------|------------------------|----------------------|------------------------|----------------------|------------------------|
|                                | Variable               | Eligible <sup>1</sup><br>(% popln) | Thyroid (% eligible) |                        | Serum (% eligible)   |                        | Folate (% eligible)  |                        |
|                                |                        |                                    | Satisfy <sup>2</sup> | Elsewhere <sup>3</sup> | Satisfy <sup>2</sup> | Elsewhere <sup>3</sup> | Satisfy <sup>2</sup> | Elsewhere <sup>3</sup> |
| 2018/19                        | 10 - <20               | <10 <sup>o</sup>                   | <10 <sup>6</sup>     | <10 <sup>6</sup>       | <10 <sup>6</sup>     | <10 <sup>6</sup>       | <10 <sup>6</sup>     | <10 <sup>6</sup>       |
|                                | 20 - <30               | <10 <sup>o</sup>                   | <10 <sup>6</sup>     | <10 <sup>6</sup>       | <10 <sup>6</sup>     | <10 <sup>6</sup>       | <10 <sup>6</sup>     | <10 <sup>6</sup>       |
|                                | 30 - <40               | <10 <sup>o</sup>                   | <10 <sup>6</sup>     | <10 <sup>6</sup>       | <10 <sup>6</sup>     | <10 <sup>6</sup>       | <10 <sup>6</sup>     | <10 <sup>6</sup>       |
|                                | 40 - <50               | <10 <sup>o</sup>                   | <10 <sup>6</sup>     | <10 <sup>6</sup>       | <10 <sup>6</sup>     | <10 <sup>6</sup>       | <10 <sup>6</sup>     | <10 <sup>6</sup>       |
|                                | 50 - <60               | <10 <sup>o</sup>                   | <10 <sup>6</sup>     | <10 <sup>6</sup>       | <10 <sup>6</sup>     | <10 <sup>6</sup>       | <10 <sup>6</sup>     | <10 <sup>6</sup>       |
|                                | 60 - <70               | <10 <sup>o</sup>                   | <10 <sup>6</sup>     | <10 <sup>6</sup>       | <10 <sup>6</sup>     | <10 <sup>6</sup>       | <10 <sup>6</sup>     | <10 <sup>6</sup>       |
|                                | 70 - <80               | <10 <sup>o</sup>                   | <10 <sup>6</sup>     | <10 <sup>6</sup>       | <10 <sup>6</sup>     | <10 <sup>6</sup>       | <10 <sup>6</sup>     | <10 <sup>6</sup>       |
|                                | 80 - <90               | <10 <sup>o</sup>                   | <10 <sup>6</sup>     | <10 <sup>6</sup>       | <10 <sup>6</sup>     | <10 <sup>6</sup>       | <10 <sup>6</sup>     | <10 <sup>6</sup>       |
|                                | 90 - <100              | <10 <sup>o</sup>                   | <10 <sup>6</sup>     | <10 <sup>6</sup>       | <10 <sup>6</sup>     | <10 <sup>6</sup>       | <10 <sup>6</sup>     | <10 <sup>6</sup>       |
|                                | 100 - <110             | <10 <sup>o</sup>                   | <10 <sup>6</sup>     | <10 <sup>6</sup>       | <10 <sup>6</sup>     | <10 <sup>6</sup>       | <10 <sup>6</sup>     | <10 <sup>6</sup>       |
|                                | 2019/20                | 10 - <20                           | <10 <sup>o</sup>     | <10 <sup>6</sup>       | <10 <sup>6</sup>     | <10 <sup>6</sup>       | <10 <sup>6</sup>     | <10 <sup>6</sup>       |
| 20 - <30                       |                        | <10 <sup>o</sup>                   | <10 <sup>6</sup>     | <10 <sup>6</sup>       | <10 <sup>6</sup>     | <10 <sup>6</sup>       | <10 <sup>6</sup>     | <10 <sup>6</sup>       |
| 30 - <40                       |                        | <10 <sup>o</sup>                   | <10 <sup>6</sup>     | <10 <sup>6</sup>       | <10 <sup>6</sup>     | <10 <sup>6</sup>       | <10 <sup>6</sup>     | <10 <sup>6</sup>       |
| 40 - <50                       |                        | <10 <sup>o</sup>                   | <10 <sup>6</sup>     | <10 <sup>6</sup>       | <10 <sup>6</sup>     | <10 <sup>6</sup>       | <10 <sup>6</sup>     | <10 <sup>6</sup>       |
| 50 - <60                       |                        | <10 <sup>o</sup>                   | <10 <sup>6</sup>     | <10 <sup>6</sup>       | <10 <sup>6</sup>     | <10 <sup>6</sup>       | <10 <sup>6</sup>     | <10 <sup>6</sup>       |
| 60 - <70                       |                        | <10 <sup>o</sup>                   | <10 <sup>6</sup>     | <10 <sup>6</sup>       | <10 <sup>6</sup>     | <10 <sup>6</sup>       | <10 <sup>6</sup>     | <10 <sup>6</sup>       |
| 70 - <80                       |                        | <10 <sup>o</sup>                   | <10 <sup>6</sup>     | <10 <sup>6</sup>       | <10 <sup>6</sup>     | <10 <sup>6</sup>       | <10 <sup>6</sup>     | <10 <sup>6</sup>       |
| 80 - <90                       |                        | <10 <sup>o</sup>                   | <10 <sup>6</sup>     | <10 <sup>6</sup>       | <10 <sup>6</sup>     | <10 <sup>6</sup>       | <10 <sup>6</sup>     | <10 <sup>6</sup>       |
| 90 - <100                      |                        | <10 <sup>o</sup>                   | <10 <sup>6</sup>     | <10 <sup>6</sup>       | <10 <sup>6</sup>     | <10 <sup>6</sup>       | <10 <sup>6</sup>     | <10 <sup>6</sup>       |
| 100 - <110                     |                        | <10 <sup>o</sup>                   | <10 <sup>6</sup>     | <10 <sup>6</sup>       | <10 <sup>6</sup>     | <10 <sup>6</sup>       | <10 <sup>6</sup>     | <10 <sup>6</sup>       |
| <b>Length of Stay (months)</b> |                        |                                    |                      |                        |                      |                        |                      |                        |
| 2017/18                        | <1                     | <10 <sup>o</sup>                   | <10 <sup>6</sup>     | <10 <sup>6</sup>       | <10 <sup>6</sup>     | <10 <sup>6</sup>       | <10 <sup>6</sup>     | <10 <sup>6</sup>       |
|                                | 1-<6                   | <10 <sup>o</sup>                   | <10 <sup>6</sup>     | <10 <sup>6</sup>       | <10 <sup>6</sup>     | <10 <sup>6</sup>       | <10 <sup>6</sup>     | <10 <sup>6</sup>       |
|                                | 6-<12                  | <10 <sup>o</sup>                   | <10 <sup>6</sup>     | <10 <sup>6</sup>       | <10 <sup>6</sup>     | <10 <sup>6</sup>       | <10 <sup>6</sup>     | <10 <sup>6</sup>       |
|                                | 12-<24                 | <10 <sup>o</sup>                   | <10 <sup>6</sup>     | <10 <sup>6</sup>       | <10 <sup>6</sup>     | <10 <sup>6</sup>       | <10 <sup>6</sup>     | <10 <sup>6</sup>       |
|                                | 24+                    | <10 <sup>o</sup>                   | <10 <sup>6</sup>     | <10 <sup>6</sup>       | <10 <sup>6</sup>     | <10 <sup>6</sup>       | <10 <sup>6</sup>     | <10 <sup>6</sup>       |
| 2018/19                        | <1                     | <10 <sup>o</sup>                   | <10 <sup>6</sup>     | <10 <sup>6</sup>       | <10 <sup>6</sup>     | <10 <sup>6</sup>       | <10 <sup>6</sup>     | <10 <sup>6</sup>       |
|                                | 1-<6                   | <10 <sup>o</sup>                   | <10 <sup>6</sup>     | <10 <sup>6</sup>       | <10 <sup>6</sup>     | <10 <sup>6</sup>       | <10 <sup>6</sup>     | <10 <sup>6</sup>       |
|                                | 6-<12                  | <10 <sup>o</sup>                   | <10 <sup>6</sup>     | <10 <sup>6</sup>       | <10 <sup>6</sup>     | <10 <sup>6</sup>       | <10 <sup>6</sup>     | <10 <sup>6</sup>       |
|                                | 12-<24                 | <10 <sup>o</sup>                   | <10 <sup>6</sup>     | <10 <sup>6</sup>       | <10 <sup>6</sup>     | <10 <sup>6</sup>       | <10 <sup>6</sup>     | <10 <sup>6</sup>       |
|                                | 24+                    | <10 <sup>o</sup>                   | <10 <sup>6</sup>     | <10 <sup>6</sup>       | <10 <sup>6</sup>     | <10 <sup>6</sup>       | <10 <sup>6</sup>     | <10 <sup>6</sup>       |
| 2019/20                        | <1                     | <10 <sup>o</sup>                   | <10 <sup>6</sup>     | <10 <sup>6</sup>       | <10 <sup>6</sup>     | <10 <sup>6</sup>       | <10 <sup>6</sup>     | <10 <sup>6</sup>       |
|                                | 1-<6                   | <10 <sup>o</sup>                   | <10 <sup>6</sup>     | <10 <sup>6</sup>       | <10 <sup>6</sup>     | <10 <sup>6</sup>       | <10 <sup>6</sup>     | <10 <sup>6</sup>       |
|                                | 6-<12                  | <10 <sup>o</sup>                   | <10 <sup>6</sup>     | <10 <sup>6</sup>       | <10 <sup>6</sup>     | <10 <sup>6</sup>       | <10 <sup>6</sup>     | <10 <sup>6</sup>       |
|                                | 12-<24                 | <10 <sup>o</sup>                   | <10 <sup>6</sup>     | <10 <sup>6</sup>       | <10 <sup>6</sup>     | <10 <sup>6</sup>       | <10 <sup>6</sup>     | <10 <sup>6</sup>       |
|                                | 24+                    | <10 <sup>o</sup>                   | <10 <sup>6</sup>     | <10 <sup>6</sup>       | <10 <sup>6</sup>     | <10 <sup>6</sup>       | <10 <sup>6</sup>     | <10 <sup>6</sup>       |
| <b>Ethnic Group</b>            |                        |                                    |                      |                        |                      |                        |                      |                        |
| 2017/18                        | White                  | <10 <sup>o</sup>                   | <10 <sup>6</sup>     | <10 <sup>6</sup>       | <10 <sup>6</sup>     | <10 <sup>6</sup>       | <10 <sup>6</sup>     | <10 <sup>6</sup>       |
|                                | Mixed                  | <10 <sup>o</sup>                   | <10 <sup>6</sup>     | <10 <sup>6</sup>       | <10 <sup>6</sup>     | <10 <sup>6</sup>       | <10 <sup>6</sup>     | <10 <sup>6</sup>       |
|                                | Asian or Asian British | <10 <sup>o</sup>                   | <10 <sup>6</sup>     | <10 <sup>6</sup>       | <10 <sup>6</sup>     | <10 <sup>6</sup>       | <10 <sup>6</sup>     | <10 <sup>6</sup>       |
|                                | Black or Black British | <10 <sup>o</sup>                   | <10 <sup>6</sup>     | <10 <sup>6</sup>       | <10 <sup>6</sup>     | <10 <sup>6</sup>       | <10 <sup>6</sup>     | <10 <sup>6</sup>       |
|                                | Chinese and Other      | <10 <sup>o</sup>                   | <10 <sup>6</sup>     | <10 <sup>6</sup>       | <10 <sup>6</sup>     | <10 <sup>6</sup>       | <10 <sup>6</sup>     | <10 <sup>6</sup>       |
|                                | Unclassified           | <10 <sup>o</sup>                   | <10 <sup>6</sup>     | <10 <sup>6</sup>       | <10 <sup>6</sup>     | <10 <sup>6</sup>       | <10 <sup>6</sup>     | <10 <sup>6</sup>       |
|                                | 2018/19                | White                              | <10 <sup>o</sup>     | <10 <sup>6</sup>       | <10 <sup>6</sup>     | <10 <sup>6</sup>       | <10 <sup>6</sup>     | <10 <sup>6</sup>       |
| Mixed                          | <10 <sup>o</sup>       | <10 <sup>6</sup>                   | <10 <sup>6</sup>     | <10 <sup>6</sup>       | <10 <sup>6</sup>     | <10 <sup>6</sup>       | <10 <sup>6</sup>     |                        |
| Asian or Asian British         | <10 <sup>o</sup>       | <10 <sup>6</sup>                   | <10 <sup>6</sup>     | <10 <sup>6</sup>       | <10 <sup>6</sup>     | <10 <sup>6</sup>       | <10 <sup>6</sup>     |                        |
| Black or Black British         | <10 <sup>o</sup>       | <10 <sup>6</sup>                   | <10 <sup>6</sup>     | <10 <sup>6</sup>       | <10 <sup>6</sup>     | <10 <sup>6</sup>       | <10 <sup>6</sup>     |                        |
| Chinese and Other              | <10 <sup>o</sup>       | <10 <sup>6</sup>                   | <10 <sup>6</sup>     | <10 <sup>6</sup>       | <10 <sup>6</sup>     | <10 <sup>6</sup>       | <10 <sup>6</sup>     |                        |
| Unclassified                   | <10 <sup>o</sup>       | <10 <sup>6</sup>                   | <10 <sup>6</sup>     | <10 <sup>6</sup>       | <10 <sup>6</sup>     | <10 <sup>6</sup>       | <10 <sup>6</sup>     |                        |
| 2019/20                        | White                  | <10 <sup>o</sup>                   | <10 <sup>6</sup>     | <10 <sup>6</sup>       | <10 <sup>6</sup>     | <10 <sup>6</sup>       | <10 <sup>6</sup>     | <10 <sup>6</sup>       |
|                                | Mixed                  | <10 <sup>o</sup>                   | <10 <sup>6</sup>     | <10 <sup>6</sup>       | <10 <sup>6</sup>     | <10 <sup>6</sup>       | <10 <sup>6</sup>     | <10 <sup>6</sup>       |
|                                | Asian or Asian British | <10 <sup>o</sup>                   | <10 <sup>6</sup>     | <10 <sup>6</sup>       | <10 <sup>6</sup>     | <10 <sup>6</sup>       | <10 <sup>6</sup>     | <10 <sup>6</sup>       |
|                                | Black or Black British | <10 <sup>o</sup>                   | <10 <sup>6</sup>     | <10 <sup>6</sup>       | <10 <sup>6</sup>     | <10 <sup>6</sup>       | <10 <sup>6</sup>     | <10 <sup>6</sup>       |
|                                | Chinese and Other      | <10 <sup>o</sup>                   | <10 <sup>6</sup>     | <10 <sup>6</sup>       | <10 <sup>6</sup>     | <10 <sup>6</sup>       | <10 <sup>6</sup>     | <10 <sup>6</sup>       |
|                                | Unclassified           | <10 <sup>o</sup>                   | <10 <sup>6</sup>     | <10 <sup>6</sup>       | <10 <sup>6</sup>     | <10 <sup>6</sup>       | <10 <sup>6</sup>     | <10 <sup>6</sup>       |

<sup>1</sup>Eligible for indicator; <sup>2</sup>Achieve in current prison; <sup>3</sup>Achieve in previous prison; <sup>4</sup>Overall achievement - either current or previous prison; <sup>5</sup>Declined indicator; <sup>6</sup>Suppressed (<10) to avoid disclosure

| Indicator              | The proportion of people with a new diagnosis of any form of dementia in the reporting year, and who have a record of the following blood tests between 12 months before and 6 months after the date of diagnosis: full blood count, calcium, glucose and/or HbA1C, urea and electrolytes, liver function, thyroid function, serum vitamin B12, folate levels |            |                                      | Community achievement 2019/20 (%): no comparable data in QOF 2019/20. Most recent QOF data was from 2018/19 and achievement was 70.01% |
|------------------------|---------------------------------------------------------------------------------------------------------------------------------------------------------------------------------------------------------------------------------------------------------------------------------------------------------------------------------------------------------------|------------|--------------------------------------|----------------------------------------------------------------------------------------------------------------------------------------|
|                        | Group: Mental health                                                                                                                                                                                                                                                                                                                                          | Population | Eligible <sup>1</sup> (% population) |                                                                                                                                        |
| <b>Year</b>            |                                                                                                                                                                                                                                                                                                                                                               |            |                                      |                                                                                                                                        |
|                        | 2017/18                                                                                                                                                                                                                                                                                                                                                       | 21,677     | 10 (0.0)                             | <10 <sup>6</sup>                                                                                                                       |
|                        | 2018/19                                                                                                                                                                                                                                                                                                                                                       | 22,099     | 10 (0.0)                             | <10 <sup>6</sup>                                                                                                                       |
|                        | 2019/20                                                                                                                                                                                                                                                                                                                                                       | 25,811     | 13 (0.1)                             | <10 <sup>6</sup>                                                                                                                       |
| <b>Prison</b>          |                                                                                                                                                                                                                                                                                                                                                               |            |                                      |                                                                                                                                        |
| 2017/18                | Prison 1                                                                                                                                                                                                                                                                                                                                                      | 1,323      | <10 <sup>6</sup>                     | <10 <sup>6</sup>                                                                                                                       |
|                        | Prison 2                                                                                                                                                                                                                                                                                                                                                      | 3,261      | <10 <sup>6</sup>                     | <10 <sup>6</sup>                                                                                                                       |
|                        | Prison 3                                                                                                                                                                                                                                                                                                                                                      | 2,623      | <10 <sup>6</sup>                     | <10 <sup>6</sup>                                                                                                                       |
|                        | Prison 4                                                                                                                                                                                                                                                                                                                                                      | 2,089      | <10 <sup>6</sup>                     | <10 <sup>6</sup>                                                                                                                       |
|                        | Prison 5                                                                                                                                                                                                                                                                                                                                                      | 637        | <10 <sup>6</sup>                     | <10 <sup>6</sup>                                                                                                                       |
|                        | Prison 6                                                                                                                                                                                                                                                                                                                                                      | 1,552      | <10 <sup>6</sup>                     | <10 <sup>6</sup>                                                                                                                       |
|                        | Prison 7                                                                                                                                                                                                                                                                                                                                                      | 635        | <10 <sup>6</sup>                     | <10 <sup>6</sup>                                                                                                                       |
|                        | Prison 8                                                                                                                                                                                                                                                                                                                                                      | 1,085      | <10 <sup>6</sup>                     | <10 <sup>6</sup>                                                                                                                       |
|                        | Prison 9                                                                                                                                                                                                                                                                                                                                                      | 981        | <10 <sup>6</sup>                     | <10 <sup>6</sup>                                                                                                                       |
|                        | Prison 10                                                                                                                                                                                                                                                                                                                                                     | 2,523      | <10 <sup>6</sup>                     | <10 <sup>6</sup>                                                                                                                       |
|                        | Prison 11                                                                                                                                                                                                                                                                                                                                                     | 3,470      | <10 <sup>6</sup>                     | <10 <sup>6</sup>                                                                                                                       |
|                        | Prison 12                                                                                                                                                                                                                                                                                                                                                     | 815        | <10 <sup>6</sup>                     | <10 <sup>6</sup>                                                                                                                       |
|                        | Prison 13                                                                                                                                                                                                                                                                                                                                                     | 683        | <10 <sup>6</sup>                     | <10 <sup>6</sup>                                                                                                                       |
| 2018/19                | Prison 1                                                                                                                                                                                                                                                                                                                                                      | 1,333      | <10 <sup>6</sup>                     | <10 <sup>6</sup>                                                                                                                       |
|                        | Prison 2                                                                                                                                                                                                                                                                                                                                                      | 2,705      | <10 <sup>6</sup>                     | <10 <sup>6</sup>                                                                                                                       |
|                        | Prison 3                                                                                                                                                                                                                                                                                                                                                      | 2,522      | <10 <sup>6</sup>                     | <10 <sup>6</sup>                                                                                                                       |
|                        | Prison 4                                                                                                                                                                                                                                                                                                                                                      | 2,349      | <10 <sup>6</sup>                     | <10 <sup>6</sup>                                                                                                                       |
|                        | Prison 5                                                                                                                                                                                                                                                                                                                                                      | 676        | <10 <sup>6</sup>                     | <10 <sup>6</sup>                                                                                                                       |
|                        | Prison 6                                                                                                                                                                                                                                                                                                                                                      | 1,513      | <10 <sup>6</sup>                     | <10 <sup>6</sup>                                                                                                                       |
|                        | Prison 7                                                                                                                                                                                                                                                                                                                                                      | 654        | <10 <sup>6</sup>                     | <10 <sup>6</sup>                                                                                                                       |
|                        | Prison 8                                                                                                                                                                                                                                                                                                                                                      | 1,148      | <10 <sup>6</sup>                     | <10 <sup>6</sup>                                                                                                                       |
|                        | Prison 9                                                                                                                                                                                                                                                                                                                                                      | 996        | <10 <sup>6</sup>                     | <10 <sup>6</sup>                                                                                                                       |
|                        | Prison 10                                                                                                                                                                                                                                                                                                                                                     | 2,717      | <10 <sup>6</sup>                     | <10 <sup>6</sup>                                                                                                                       |
|                        | Prison 11                                                                                                                                                                                                                                                                                                                                                     | 4,020      | <10 <sup>6</sup>                     | <10 <sup>6</sup>                                                                                                                       |
|                        | Prison 12                                                                                                                                                                                                                                                                                                                                                     | 792        | <10 <sup>6</sup>                     | <10 <sup>6</sup>                                                                                                                       |
|                        | Prison 13                                                                                                                                                                                                                                                                                                                                                     | 674        | <10 <sup>6</sup>                     | <10 <sup>6</sup>                                                                                                                       |
| 2019/20                | Prison 1                                                                                                                                                                                                                                                                                                                                                      | 1,410      | <10 <sup>6</sup>                     | <10 <sup>6</sup>                                                                                                                       |
|                        | Prison 2                                                                                                                                                                                                                                                                                                                                                      | 2,979      | <10 <sup>6</sup>                     | <10 <sup>6</sup>                                                                                                                       |
|                        | Prison 3                                                                                                                                                                                                                                                                                                                                                      | 2,809      | <10 <sup>6</sup>                     | <10 <sup>6</sup>                                                                                                                       |
|                        | Prison 4                                                                                                                                                                                                                                                                                                                                                      | 2,651      | <10 <sup>6</sup>                     | <10 <sup>6</sup>                                                                                                                       |
|                        | Prison 5                                                                                                                                                                                                                                                                                                                                                      | 616        | <10 <sup>6</sup>                     | <10 <sup>6</sup>                                                                                                                       |
|                        | Prison 6                                                                                                                                                                                                                                                                                                                                                      | 1,533      | <10 <sup>6</sup>                     | <10 <sup>6</sup>                                                                                                                       |
|                        | Prison 7                                                                                                                                                                                                                                                                                                                                                      | 860        | <10 <sup>6</sup>                     | <10 <sup>6</sup>                                                                                                                       |
|                        | Prison 8                                                                                                                                                                                                                                                                                                                                                      | 1,385      | <10 <sup>6</sup>                     | <10 <sup>6</sup>                                                                                                                       |
|                        | Prison 9                                                                                                                                                                                                                                                                                                                                                      | 1,092      | <10 <sup>6</sup>                     | <10 <sup>6</sup>                                                                                                                       |
|                        | Prison 10                                                                                                                                                                                                                                                                                                                                                     | 3,577      | <10 <sup>6</sup>                     | <10 <sup>6</sup>                                                                                                                       |
|                        | Prison 11                                                                                                                                                                                                                                                                                                                                                     | 5,348      | <10 <sup>6</sup>                     | <10 <sup>6</sup>                                                                                                                       |
|                        | Prison 12                                                                                                                                                                                                                                                                                                                                                     | 805        | <10 <sup>6</sup>                     | <10 <sup>6</sup>                                                                                                                       |
|                        | Prison 13                                                                                                                                                                                                                                                                                                                                                     | 746        | <10 <sup>6</sup>                     | <10 <sup>6</sup>                                                                                                                       |
| <b>Prison category</b> |                                                                                                                                                                                                                                                                                                                                                               |            |                                      |                                                                                                                                        |
| 2017/18                | A                                                                                                                                                                                                                                                                                                                                                             | 1,664      | <10 <sup>6</sup>                     | <10 <sup>6</sup>                                                                                                                       |
|                        | B                                                                                                                                                                                                                                                                                                                                                             | 9,254      | <10 <sup>6</sup>                     | <10 <sup>6</sup>                                                                                                                       |
|                        | C                                                                                                                                                                                                                                                                                                                                                             | 6,035      | <10 <sup>6</sup>                     | <10 <sup>6</sup>                                                                                                                       |
|                        | Closed                                                                                                                                                                                                                                                                                                                                                        | 1,720      | <10 <sup>6</sup>                     | <10 <sup>6</sup>                                                                                                                       |
|                        | D                                                                                                                                                                                                                                                                                                                                                             | 2,189      | <10 <sup>6</sup>                     | <10 <sup>6</sup>                                                                                                                       |
|                        | YOI                                                                                                                                                                                                                                                                                                                                                           | 815        | <10 <sup>6</sup>                     | <10 <sup>6</sup>                                                                                                                       |
| 2018/19                | A                                                                                                                                                                                                                                                                                                                                                             | 1,670      | <10 <sup>6</sup>                     | <10 <sup>6</sup>                                                                                                                       |
|                        | B                                                                                                                                                                                                                                                                                                                                                             | 9,442      | <10 <sup>6</sup>                     | <10 <sup>6</sup>                                                                                                                       |
|                        | C                                                                                                                                                                                                                                                                                                                                                             | 6,204      | <10 <sup>6</sup>                     | <10 <sup>6</sup>                                                                                                                       |
|                        | Closed                                                                                                                                                                                                                                                                                                                                                        | 1,802      | <10 <sup>6</sup>                     | <10 <sup>6</sup>                                                                                                                       |
|                        | D                                                                                                                                                                                                                                                                                                                                                             | 2,189      | <10 <sup>6</sup>                     | <10 <sup>6</sup>                                                                                                                       |
|                        | YOI                                                                                                                                                                                                                                                                                                                                                           | 792        | <10 <sup>6</sup>                     | <10 <sup>6</sup>                                                                                                                       |
| 2019/20                | A                                                                                                                                                                                                                                                                                                                                                             | 1,838      | <10 <sup>6</sup>                     | <10 <sup>6</sup>                                                                                                                       |
|                        | B                                                                                                                                                                                                                                                                                                                                                             | 11,904     | <10 <sup>6</sup>                     | <10 <sup>6</sup>                                                                                                                       |
|                        | C                                                                                                                                                                                                                                                                                                                                                             | 6,870      | <10 <sup>6</sup>                     | <10 <sup>6</sup>                                                                                                                       |
|                        | Closed                                                                                                                                                                                                                                                                                                                                                        | 2,245      | <10 <sup>6</sup>                     | <10 <sup>6</sup>                                                                                                                       |
|                        | D                                                                                                                                                                                                                                                                                                                                                             | 2,149      | <10 <sup>6</sup>                     | <10 <sup>6</sup>                                                                                                                       |
|                        | YOI                                                                                                                                                                                                                                                                                                                                                           | 805        | <10 <sup>6</sup>                     | <10 <sup>6</sup>                                                                                                                       |
| <b>Gender</b>          |                                                                                                                                                                                                                                                                                                                                                               |            |                                      |                                                                                                                                        |
| 2017/18                | F                                                                                                                                                                                                                                                                                                                                                             | 1,699      | <10 <sup>6</sup>                     | <10 <sup>6</sup>                                                                                                                       |
|                        | M                                                                                                                                                                                                                                                                                                                                                             | 19,977     | 10 (0.1)                             | <10 <sup>6</sup>                                                                                                                       |
| 2018/19                | F                                                                                                                                                                                                                                                                                                                                                             | 1,802      | <10 <sup>6</sup>                     | <10 <sup>6</sup>                                                                                                                       |
|                        | M                                                                                                                                                                                                                                                                                                                                                             | 20,295     | 10 (0.0)                             | <10 <sup>6</sup>                                                                                                                       |
| 2019/20                | F                                                                                                                                                                                                                                                                                                                                                             | 1,376      | <10 <sup>6</sup>                     | <10 <sup>6</sup>                                                                                                                       |
|                        | M                                                                                                                                                                                                                                                                                                                                                             | 23,570     | 12 (0.1)                             | <10 <sup>6</sup>                                                                                                                       |

<sup>1</sup>Eligible for indicator; <sup>2</sup>Achieve in current prison; <sup>3</sup>Achieve in previous prison; <sup>4</sup>Overall achievement - either current or previous prison; <sup>5</sup>Declined indicator; <sup>6</sup>Suppressed (<10) to avoid disclosure

| Indicator              | The proportion of people with a new diagnosis of any form of dementia in the reporting year, and who have a record of the following blood tests between 12 months before and 6 months after the date of diagnosis: full blood count, calcium, glucose and/or HbA1C, urea and electrolytes, liver function, thyroid function, serum vitamin B12, folate levels |                  |                                      | Community achievement 2019/20 (%): no comparable data in QOF 2019/20. Most recent QOF data was from 2018/19 and achievement was 70.01% |
|------------------------|---------------------------------------------------------------------------------------------------------------------------------------------------------------------------------------------------------------------------------------------------------------------------------------------------------------------------------------------------------------|------------------|--------------------------------------|----------------------------------------------------------------------------------------------------------------------------------------|
|                        | Group: Mental health                                                                                                                                                                                                                                                                                                                                          | Population       | Eligible <sup>1</sup> (% population) |                                                                                                                                        |
| <b>Sentence Status</b> |                                                                                                                                                                                                                                                                                                                                                               |                  |                                      |                                                                                                                                        |
| 2017/18                | .                                                                                                                                                                                                                                                                                                                                                             | 81               | <10 <sup>o</sup>                     | <10 <sup>o</sup>                                                                                                                       |
|                        | Absconded                                                                                                                                                                                                                                                                                                                                                     | <10 <sup>o</sup> | <10 <sup>o</sup>                     | <10 <sup>o</sup>                                                                                                                       |
|                        | Active In                                                                                                                                                                                                                                                                                                                                                     | 15,872           | <10 <sup>o</sup>                     | <10 <sup>o</sup>                                                                                                                       |
|                        | Active Out                                                                                                                                                                                                                                                                                                                                                    | 1,052            | <10 <sup>o</sup>                     | <10 <sup>o</sup>                                                                                                                       |
|                        | Convicted Sentence                                                                                                                                                                                                                                                                                                                                            | 2,125            | <10 <sup>o</sup>                     | <10 <sup>o</sup>                                                                                                                       |
|                        | Downgrade in security category                                                                                                                                                                                                                                                                                                                                | <10 <sup>o</sup> | <10 <sup>o</sup>                     | <10 <sup>o</sup>                                                                                                                       |
|                        | Internal Cell Move                                                                                                                                                                                                                                                                                                                                            | <10 <sup>o</sup> | <10 <sup>o</sup>                     | <10 <sup>o</sup>                                                                                                                       |
|                        | Judges Remand                                                                                                                                                                                                                                                                                                                                                 | 92               | <10 <sup>o</sup>                     | <10 <sup>o</sup>                                                                                                                       |
|                        | Licence Revoke                                                                                                                                                                                                                                                                                                                                                | 52               | <10 <sup>o</sup>                     | <10 <sup>o</sup>                                                                                                                       |
|                        | On Remand                                                                                                                                                                                                                                                                                                                                                     | 1,492            | <10 <sup>o</sup>                     | <10 <sup>o</sup>                                                                                                                       |
|                        | Transfer                                                                                                                                                                                                                                                                                                                                                      | 910              | <10 <sup>o</sup>                     | <10 <sup>o</sup>                                                                                                                       |
|                        | Upgrade in security category                                                                                                                                                                                                                                                                                                                                  | <10 <sup>o</sup> | <10 <sup>o</sup>                     | <10 <sup>o</sup>                                                                                                                       |
| 2018/19                | .                                                                                                                                                                                                                                                                                                                                                             | 88               | <10 <sup>o</sup>                     | <10 <sup>o</sup>                                                                                                                       |
|                        | Absconded                                                                                                                                                                                                                                                                                                                                                     | <10 <sup>o</sup> | <10 <sup>o</sup>                     | <10 <sup>o</sup>                                                                                                                       |
|                        | Active In                                                                                                                                                                                                                                                                                                                                                     | 18,145           | <10 <sup>o</sup>                     | <10 <sup>o</sup>                                                                                                                       |
|                        | Active Out                                                                                                                                                                                                                                                                                                                                                    | 835              | <10 <sup>o</sup>                     | <10 <sup>o</sup>                                                                                                                       |
|                        | Convicted Sentence                                                                                                                                                                                                                                                                                                                                            | 1,320            | <10 <sup>o</sup>                     | <10 <sup>o</sup>                                                                                                                       |
|                        | Downgrade in security category                                                                                                                                                                                                                                                                                                                                | <10 <sup>o</sup> | <10 <sup>o</sup>                     | <10 <sup>o</sup>                                                                                                                       |
|                        | Internal Cell Move                                                                                                                                                                                                                                                                                                                                            | <10 <sup>o</sup> | <10 <sup>o</sup>                     | <10 <sup>o</sup>                                                                                                                       |
|                        | Judges Remand                                                                                                                                                                                                                                                                                                                                                 | <10 <sup>o</sup> | <10 <sup>o</sup>                     | <10 <sup>o</sup>                                                                                                                       |
|                        | Licence Revoke                                                                                                                                                                                                                                                                                                                                                | 125              | <10 <sup>o</sup>                     | <10 <sup>o</sup>                                                                                                                       |
|                        | On Remand                                                                                                                                                                                                                                                                                                                                                     | 1,059            | <10 <sup>o</sup>                     | <10 <sup>o</sup>                                                                                                                       |
|                        | Transfer                                                                                                                                                                                                                                                                                                                                                      | 518              | <10 <sup>o</sup>                     | <10 <sup>o</sup>                                                                                                                       |
|                        | Upgrade in security category                                                                                                                                                                                                                                                                                                                                  | <10 <sup>o</sup> | <10 <sup>o</sup>                     | <10 <sup>o</sup>                                                                                                                       |
| 2019/20                | .                                                                                                                                                                                                                                                                                                                                                             | 69               | <10 <sup>o</sup>                     | <10 <sup>o</sup>                                                                                                                       |
|                        | Absconded                                                                                                                                                                                                                                                                                                                                                     | <10 <sup>o</sup> | <10 <sup>o</sup>                     | <10 <sup>o</sup>                                                                                                                       |
|                        | Active In                                                                                                                                                                                                                                                                                                                                                     | 22,424           | 10 (0.0)                             | <10 <sup>o</sup>                                                                                                                       |
|                        | Active Out                                                                                                                                                                                                                                                                                                                                                    | 625              | <10 <sup>o</sup>                     | <10 <sup>o</sup>                                                                                                                       |
|                        | Convicted Sentence                                                                                                                                                                                                                                                                                                                                            | 1,361            | <10 <sup>o</sup>                     | <10 <sup>o</sup>                                                                                                                       |
|                        | Downgrade in security category                                                                                                                                                                                                                                                                                                                                | <10 <sup>o</sup> | <10 <sup>o</sup>                     | <10 <sup>o</sup>                                                                                                                       |
|                        | Internal Cell Move                                                                                                                                                                                                                                                                                                                                            | <10 <sup>o</sup> | <10 <sup>o</sup>                     | <10 <sup>o</sup>                                                                                                                       |
|                        | Judges Remand                                                                                                                                                                                                                                                                                                                                                 | 19               | <10 <sup>o</sup>                     | <10 <sup>o</sup>                                                                                                                       |
|                        | Licence Revoke                                                                                                                                                                                                                                                                                                                                                | 178              | <10 <sup>o</sup>                     | <10 <sup>o</sup>                                                                                                                       |
|                        | On Remand                                                                                                                                                                                                                                                                                                                                                     | 1,031            | <10 <sup>o</sup>                     | <10 <sup>o</sup>                                                                                                                       |
|                        | Transfer                                                                                                                                                                                                                                                                                                                                                      | 101              | <10 <sup>o</sup>                     | <10 <sup>o</sup>                                                                                                                       |
|                        | Upgrade in security category                                                                                                                                                                                                                                                                                                                                  | <10 <sup>o</sup> | <10 <sup>o</sup>                     | <10 <sup>o</sup>                                                                                                                       |
| <b>Age - years</b>     |                                                                                                                                                                                                                                                                                                                                                               |                  |                                      |                                                                                                                                        |
| 2017/18                | 10 - <20                                                                                                                                                                                                                                                                                                                                                      | 468              | <10 <sup>o</sup>                     | <10 <sup>o</sup>                                                                                                                       |
|                        | 20 - <30                                                                                                                                                                                                                                                                                                                                                      | 6,994            | <10 <sup>o</sup>                     | <10 <sup>o</sup>                                                                                                                       |
|                        | 30 - <40                                                                                                                                                                                                                                                                                                                                                      | 7,051            | <10 <sup>o</sup>                     | <10 <sup>o</sup>                                                                                                                       |
|                        | 40 - <50                                                                                                                                                                                                                                                                                                                                                      | 4,114            | <10 <sup>o</sup>                     | <10 <sup>o</sup>                                                                                                                       |
|                        | 50 - <60                                                                                                                                                                                                                                                                                                                                                      | 2,107            | <10 <sup>o</sup>                     | <10 <sup>o</sup>                                                                                                                       |
|                        | 60 - <70                                                                                                                                                                                                                                                                                                                                                      | 684              | <10 <sup>o</sup>                     | <10 <sup>o</sup>                                                                                                                       |
|                        | 70 - <80                                                                                                                                                                                                                                                                                                                                                      | 213              | <10 <sup>o</sup>                     | <10 <sup>o</sup>                                                                                                                       |
|                        | 80 - <90                                                                                                                                                                                                                                                                                                                                                      | 40               | <10 <sup>o</sup>                     | <10 <sup>o</sup>                                                                                                                       |
|                        | 90 - <100                                                                                                                                                                                                                                                                                                                                                     | <10 <sup>o</sup> | <10 <sup>o</sup>                     | <10 <sup>o</sup>                                                                                                                       |
|                        | 100 - <110                                                                                                                                                                                                                                                                                                                                                    | <10 <sup>o</sup> | <10 <sup>o</sup>                     | <10 <sup>o</sup>                                                                                                                       |
| 2018/19                | 10 - <20                                                                                                                                                                                                                                                                                                                                                      | 436              | <10 <sup>o</sup>                     | <10 <sup>o</sup>                                                                                                                       |
|                        | 20 - <30                                                                                                                                                                                                                                                                                                                                                      | 7,163            | <10 <sup>o</sup>                     | <10 <sup>o</sup>                                                                                                                       |
|                        | 30 - <40                                                                                                                                                                                                                                                                                                                                                      | 7,381            | <10 <sup>o</sup>                     | <10 <sup>o</sup>                                                                                                                       |
|                        | 40 - <50                                                                                                                                                                                                                                                                                                                                                      | 4,180            | <10 <sup>o</sup>                     | <10 <sup>o</sup>                                                                                                                       |
|                        | 50 - <60                                                                                                                                                                                                                                                                                                                                                      | 1,978            | <10 <sup>o</sup>                     | <10 <sup>o</sup>                                                                                                                       |
|                        | 60 - <70                                                                                                                                                                                                                                                                                                                                                      | 701              | <10 <sup>o</sup>                     | <10 <sup>o</sup>                                                                                                                       |
|                        | 70 - <80                                                                                                                                                                                                                                                                                                                                                      | 209              | <10 <sup>o</sup>                     | <10 <sup>o</sup>                                                                                                                       |
|                        | 80 - <90                                                                                                                                                                                                                                                                                                                                                      | 45               | <10 <sup>o</sup>                     | <10 <sup>o</sup>                                                                                                                       |
|                        | 90 - <100                                                                                                                                                                                                                                                                                                                                                     | <10 <sup>o</sup> | <10 <sup>o</sup>                     | <10 <sup>o</sup>                                                                                                                       |
|                        | 100 - <110                                                                                                                                                                                                                                                                                                                                                    | <10 <sup>o</sup> | <10 <sup>o</sup>                     | <10 <sup>o</sup>                                                                                                                       |
| 2019/20                | 10 - <20                                                                                                                                                                                                                                                                                                                                                      | 404              | <10 <sup>o</sup>                     | <10 <sup>o</sup>                                                                                                                       |
|                        | 20 - <30                                                                                                                                                                                                                                                                                                                                                      | 8,064            | <10 <sup>o</sup>                     | <10 <sup>o</sup>                                                                                                                       |
|                        | 30 - <40                                                                                                                                                                                                                                                                                                                                                      | 9,125            | <10 <sup>o</sup>                     | <10 <sup>o</sup>                                                                                                                       |
|                        | 40 - <50                                                                                                                                                                                                                                                                                                                                                      | 4,948            | <10 <sup>o</sup>                     | <10 <sup>o</sup>                                                                                                                       |
|                        | 50 - <60                                                                                                                                                                                                                                                                                                                                                      | 2,224            | <10 <sup>o</sup>                     | <10 <sup>o</sup>                                                                                                                       |
|                        | 60 - <70                                                                                                                                                                                                                                                                                                                                                      | 751              | <10 <sup>o</sup>                     | <10 <sup>o</sup>                                                                                                                       |
|                        | 70 - <80                                                                                                                                                                                                                                                                                                                                                      | 238              | <10 <sup>o</sup>                     | <10 <sup>o</sup>                                                                                                                       |
|                        | 80 - <90                                                                                                                                                                                                                                                                                                                                                      | 53               | <10 <sup>o</sup>                     | <10 <sup>o</sup>                                                                                                                       |
|                        | 90 - <100                                                                                                                                                                                                                                                                                                                                                     | <10 <sup>o</sup> | <10 <sup>o</sup>                     | <10 <sup>o</sup>                                                                                                                       |
|                        | 100 - <110                                                                                                                                                                                                                                                                                                                                                    | <10 <sup>o</sup> | <10 <sup>o</sup>                     | <10 <sup>o</sup>                                                                                                                       |

<sup>1</sup>Eligible for indicator; <sup>2</sup>Achieve in current prison; <sup>3</sup>Achieve in previous prison; <sup>4</sup>Overall achievement - either current or previous prison; <sup>5</sup>Declined indicator; <sup>6</sup>Suppressed (<10) to avoid disclosure

| <i>The proportion of people with a new diagnosis of any form of dementia in the reporting year, and who have a record of the following blood tests between 12 months before and 6 months after the date of diagnosis: full blood count, calcium, glucose and/or HbA1C, urea and electrolytes, liver function, thyroid function, serum vitamin B12, folate levels</i> |                        |            |                                      | Community achievement 2019/20 (%): no comparable data in QOF 2019/20. Most recent QOF data was from 2018/19 and achievement was 70.01% |
|----------------------------------------------------------------------------------------------------------------------------------------------------------------------------------------------------------------------------------------------------------------------------------------------------------------------------------------------------------------------|------------------------|------------|--------------------------------------|----------------------------------------------------------------------------------------------------------------------------------------|
| Indicator                                                                                                                                                                                                                                                                                                                                                            | Group: Mental health   | Population | Eligible <sup>1</sup> (% population) |                                                                                                                                        |
|                                                                                                                                                                                                                                                                                                                                                                      | Variable               |            |                                      | Achieved <sup>4</sup> 5 of the 8 blood tests (% eligible)                                                                              |
| <b>Length of Stay (months)</b>                                                                                                                                                                                                                                                                                                                                       |                        |            |                                      |                                                                                                                                        |
| 2017/18                                                                                                                                                                                                                                                                                                                                                              | <1                     | 4,474      | <10 <sup>6</sup>                     | <10 <sup>6</sup>                                                                                                                       |
|                                                                                                                                                                                                                                                                                                                                                                      | 1-<6                   | 8,075      | <10 <sup>6</sup>                     | <10 <sup>6</sup>                                                                                                                       |
|                                                                                                                                                                                                                                                                                                                                                                      | 6-<12                  | 3,672      | <10 <sup>6</sup>                     | <10 <sup>6</sup>                                                                                                                       |
|                                                                                                                                                                                                                                                                                                                                                                      | 12-<24                 | 2,832      | <10 <sup>6</sup>                     | <10 <sup>6</sup>                                                                                                                       |
|                                                                                                                                                                                                                                                                                                                                                                      | 24+                    | 2,624      | <10 <sup>6</sup>                     | <10 <sup>6</sup>                                                                                                                       |
| 2018/19                                                                                                                                                                                                                                                                                                                                                              | <1                     | 4,801      | <10 <sup>6</sup>                     | <10 <sup>6</sup>                                                                                                                       |
|                                                                                                                                                                                                                                                                                                                                                                      | 1-<6                   | 7,742      | <10 <sup>6</sup>                     | <10 <sup>6</sup>                                                                                                                       |
|                                                                                                                                                                                                                                                                                                                                                                      | 6-<12                  | 3,616      | <10 <sup>6</sup>                     | <10 <sup>6</sup>                                                                                                                       |
|                                                                                                                                                                                                                                                                                                                                                                      | 12-<24                 | 3,447      | <10 <sup>6</sup>                     | <10 <sup>6</sup>                                                                                                                       |
|                                                                                                                                                                                                                                                                                                                                                                      | 24+                    | 2,493      | <10 <sup>6</sup>                     | <10 <sup>6</sup>                                                                                                                       |
| 2019/20                                                                                                                                                                                                                                                                                                                                                              | <1                     | 5,745      | <10 <sup>6</sup>                     | <10 <sup>6</sup>                                                                                                                       |
|                                                                                                                                                                                                                                                                                                                                                                      | 1-<6                   | 9,697      | <10 <sup>6</sup>                     | <10 <sup>6</sup>                                                                                                                       |
|                                                                                                                                                                                                                                                                                                                                                                      | 6-<12                  | 5,090      | <10 <sup>6</sup>                     | <10 <sup>6</sup>                                                                                                                       |
|                                                                                                                                                                                                                                                                                                                                                                      | 12-<24                 | 3,244      | <10 <sup>6</sup>                     | <10 <sup>6</sup>                                                                                                                       |
|                                                                                                                                                                                                                                                                                                                                                                      | 24+                    | 2,035      | <10 <sup>6</sup>                     | <10 <sup>6</sup>                                                                                                                       |
| <b>Ethnic Group</b>                                                                                                                                                                                                                                                                                                                                                  |                        |            |                                      |                                                                                                                                        |
| 2017/18                                                                                                                                                                                                                                                                                                                                                              | White                  | 15,638     | <10 <sup>6</sup>                     | <10 <sup>6</sup>                                                                                                                       |
|                                                                                                                                                                                                                                                                                                                                                                      | Mixed                  | 431        | <10 <sup>6</sup>                     | <10 <sup>6</sup>                                                                                                                       |
|                                                                                                                                                                                                                                                                                                                                                                      | Asian or Asian British | 813        | <10 <sup>6</sup>                     | <10 <sup>6</sup>                                                                                                                       |
|                                                                                                                                                                                                                                                                                                                                                                      | Black or Black British | 404        | <10 <sup>6</sup>                     | <10 <sup>6</sup>                                                                                                                       |
|                                                                                                                                                                                                                                                                                                                                                                      | Chinese and Other      | 214        | <10 <sup>6</sup>                     | <10 <sup>6</sup>                                                                                                                       |
| 2018/19                                                                                                                                                                                                                                                                                                                                                              | Unclassified           | 372        | <10 <sup>6</sup>                     | <10 <sup>6</sup>                                                                                                                       |
|                                                                                                                                                                                                                                                                                                                                                                      | White                  | 14,911     | <10 <sup>6</sup>                     | <10 <sup>6</sup>                                                                                                                       |
|                                                                                                                                                                                                                                                                                                                                                                      | Mixed                  | 371        | <10 <sup>6</sup>                     | <10 <sup>6</sup>                                                                                                                       |
|                                                                                                                                                                                                                                                                                                                                                                      | Asian or Asian British | 726        | <10 <sup>6</sup>                     | <10 <sup>6</sup>                                                                                                                       |
|                                                                                                                                                                                                                                                                                                                                                                      | Black or Black British | 364        | <10 <sup>6</sup>                     | <10 <sup>6</sup>                                                                                                                       |
| 2019/20                                                                                                                                                                                                                                                                                                                                                              | Chinese and Other      | 167        | <10 <sup>6</sup>                     | <10 <sup>6</sup>                                                                                                                       |
|                                                                                                                                                                                                                                                                                                                                                                      | Unclassified           | 409        | <10 <sup>6</sup>                     | <10 <sup>6</sup>                                                                                                                       |
|                                                                                                                                                                                                                                                                                                                                                                      | White                  | 16,606     | 10 (0.1)                             | <10 <sup>6</sup>                                                                                                                       |
|                                                                                                                                                                                                                                                                                                                                                                      | Mixed                  | 409        | <10 <sup>6</sup>                     | <10 <sup>6</sup>                                                                                                                       |
|                                                                                                                                                                                                                                                                                                                                                                      | Asian or Asian British | 755        | <10 <sup>6</sup>                     | <10 <sup>6</sup>                                                                                                                       |
|                                                                                                                                                                                                                                                                                                                                                                      | Black or Black British | 451        | <10 <sup>6</sup>                     | <10 <sup>6</sup>                                                                                                                       |
|                                                                                                                                                                                                                                                                                                                                                                      | Chinese and Other      | 163        | <10 <sup>6</sup>                     | <10 <sup>6</sup>                                                                                                                       |
|                                                                                                                                                                                                                                                                                                                                                                      | Unclassified           | 387        | <10 <sup>6</sup>                     | <10 <sup>6</sup>                                                                                                                       |

<sup>1</sup>Eligible for indicator; <sup>2</sup>Achieve in current prison; <sup>3</sup>Achieve in previous prison; <sup>4</sup>Overall achievement - either current or previous prison; <sup>5</sup>Declined indicator; <sup>6</sup>Suppressed (<10) to avoid disclosure

| Indicator              | The proportion of new receptions to prison accepting opt out dry blood spot testing |            |                                    |                                      |                                        |                                      | Community achievement 2019/20 (%):<br>NA |
|------------------------|-------------------------------------------------------------------------------------|------------|------------------------------------|--------------------------------------|----------------------------------------|--------------------------------------|------------------------------------------|
|                        | Group: Communicable Disease                                                         |            |                                    |                                      |                                        |                                      |                                          |
|                        | Variable                                                                            | Population | Eligible <sup>1</sup><br>(% popln) | Satisfy <sup>2</sup><br>(% eligible) | Elsewhere <sup>3</sup><br>(% eligible) | Achieve <sup>4</sup><br>(% eligible) |                                          |
| <b>Year</b>            |                                                                                     |            |                                    |                                      |                                        |                                      |                                          |
|                        | 2017/18                                                                             | 21,677     | 13,072 (60.3)                      | 81 (0.6)                             | 64 (0.5)                               | 145 (1.1)                            |                                          |
|                        | 2018/19                                                                             | 22,099     | 12,401 (56.1)                      | 3,436 (27.7)                         | 337 (2.7)                              | 3,773 (30.4)                         |                                          |
|                        | 2019/20                                                                             | 25,811     | 12,606 (48.8)                      | 4,711 (37.4)                         | 942 (7.5)                              | 5,653 (44.8)                         |                                          |
| <b>Prison</b>          |                                                                                     |            |                                    |                                      |                                        |                                      |                                          |
| 2017/18                | Prison 1                                                                            | 1,323      | 832 (62.9)                         | <10 <sup>6</sup>                     | <10 <sup>6</sup>                       | <10 <sup>6</sup>                     |                                          |
|                        | Prison 2                                                                            | 3,261      | 2,313 (70.9)                       | <10 <sup>6</sup>                     | <10 <sup>6</sup>                       | <10 <sup>6</sup>                     |                                          |
|                        | Prison 3                                                                            | 2,623      | 1,785 (68.1)                       | <10 <sup>6</sup>                     | 16 (0.9)                               | 22 (1.2)                             |                                          |
|                        | Prison 4                                                                            | 2,089      | 1,049 (50.2)                       | <10 <sup>6</sup>                     | <10 <sup>6</sup>                       | 10 (1.0)                             |                                          |
|                        | Prison 5                                                                            | 637        | 370 (58.1)                         | <10 <sup>6</sup>                     | <10 <sup>6</sup>                       | <10 <sup>6</sup>                     |                                          |
|                        | Prison 6                                                                            | 1,552      | 968 (62.4)                         | <10 <sup>6</sup>                     | <10 <sup>6</sup>                       | <10 <sup>6</sup>                     |                                          |
|                        | Prison 7                                                                            | 635        | 410 (64.6)                         | 17 (4.1)                             | <10 <sup>6</sup>                       | 18 (4.4)                             |                                          |
|                        | Prison 8                                                                            | 1,085      | 477 (44.0)                         | <10 <sup>6</sup>                     | <10 <sup>6</sup>                       | <10 <sup>6</sup>                     |                                          |
|                        | Prison 9                                                                            | 981        | 206 (21.0)                         | 27 (13.1)                            | <10 <sup>6</sup>                       | 28 (13.6)                            |                                          |
|                        | Prison 10                                                                           | 2,523      | 1,505 (59.7)                       | <10 <sup>6</sup>                     | <10 <sup>6</sup>                       | <10 <sup>6</sup>                     |                                          |
|                        | Prison 11                                                                           | 3,470      | 2,578 (74.3)                       | 29 (1.1)                             | <10 <sup>6</sup>                       | 37 (1.4)                             |                                          |
|                        | Prison 12                                                                           | 815        | 441 (54.1)                         | <10 <sup>6</sup>                     | <10 <sup>6</sup>                       | <10 <sup>6</sup>                     |                                          |
|                        | Prison 13                                                                           | 683        | 138 (20.2)                         | <10 <sup>6</sup>                     | <10 <sup>6</sup>                       | <10 <sup>6</sup>                     |                                          |
| 2018/19                | Prison 1                                                                            | 1,333      | 814 (61.1)                         | 470 (57.7)                           | 26 (3.2)                               | 496 (60.9)                           |                                          |
|                        | Prison 2                                                                            | 2,705      | 1,693 (62.6)                       | 965 (57.0)                           | <10 <sup>6</sup>                       | 967 (57.1)                           |                                          |
|                        | Prison 3                                                                            | 2,522      | 1,340 (53.1)                       | 167 (12.5)                           | 76 (5.7)                               | 243 (18.1)                           |                                          |
|                        | Prison 4                                                                            | 2,349      | 1,139 (48.5)                       | 207 (18.2)                           | 64 (5.6)                               | 271 (23.8)                           |                                          |
|                        | Prison 5                                                                            | 676        | 397 (58.7)                         | 93 (23.4)                            | 21 (5.3)                               | 114 (28.7)                           |                                          |
|                        | Prison 6                                                                            | 1,513      | 926 (61.2)                         | 302 (32.6)                           | 64 (6.9)                               | 366 (39.5)                           |                                          |
|                        | Prison 7                                                                            | 654        | 322 (49.2)                         | 168 (52.2)                           | <10 <sup>6</sup>                       | 175 (54.3)                           |                                          |
|                        | Prison 8                                                                            | 1,148      | 646 (56.3)                         | 438 (67.8)                           | <10 <sup>6</sup>                       | 438 (67.8)                           |                                          |
|                        | Prison 9                                                                            | 996        | 191 (19.2)                         | 25 (13.1)                            | 10 (5.2)                               | 35 (18.3)                            |                                          |
|                        | Prison 10                                                                           | 2,717      | 1,939 (71.4)                       | <10 <sup>6</sup>                     | 25 (1.3)                               | 25 (1.3)                             |                                          |
|                        | Prison 11                                                                           | 4,020      | 2,465 (61.3)                       | 494 (20.0)                           | 21 (0.9)                               | 515 (20.9)                           |                                          |
|                        | Prison 12                                                                           | 792        | 377 (47.6)                         | 107 (28.4)                           | 19 (5.0)                               | 126 (33.4)                           |                                          |
|                        | Prison 13                                                                           | 674        | 152 (22.6)                         | <10 <sup>6</sup>                     | <10 <sup>6</sup>                       | <10 <sup>6</sup>                     |                                          |
| 2019/20                | Prison 1                                                                            | 1,410      | 779 (55.2)                         | 690 (88.6)                           | 30 (3.9)                               | 720 (92.4)                           |                                          |
|                        | Prison 2                                                                            | 2,979      | 1,693 (56.8)                       | 1,066 (63.0)                         | 119 (7.0)                              | 1,185 (70.0)                         |                                          |
|                        | Prison 3                                                                            | 2,809      | 1,266 (45.1)                       | 181 (14.3)                           | 312 (24.6)                             | 493 (38.9)                           |                                          |
|                        | Prison 4                                                                            | 2,651      | 1,108 (41.8)                       | 550 (49.6)                           | 150 (13.5)                             | 700 (63.2)                           |                                          |
|                        | Prison 5                                                                            | 616        | 334 (54.2)                         | 187 (56.0)                           | 47 (14.1)                              | 234 (70.1)                           |                                          |
|                        | Prison 6                                                                            | 1,533      | 856 (55.8)                         | 340 (39.7)                           | 84 (9.8)                               | 424 (49.5)                           |                                          |
|                        | Prison 7                                                                            | 860        | 376 (43.7)                         | 214 (56.9)                           | 17 (4.5)                               | 231 (61.4)                           |                                          |
|                        | Prison 8                                                                            | 1,385      | 658 (47.5)                         | 547 (83.1)                           | <10 <sup>6</sup>                       | 552 (83.9)                           |                                          |
|                        | Prison 9                                                                            | 1,092      | 234 (21.4)                         | 53 (22.6)                            | 43 (18.4)                              | 96 (41.0)                            |                                          |
|                        | Prison 10                                                                           | 3,577      | 1,947 (54.4)                       | <10 <sup>6</sup>                     | 42 (2.2)                               | 42 (2.2)                             |                                          |
|                        | Prison 11                                                                           | 5,348      | 2,798 (52.3)                       | 656 (23.4)                           | 53 (1.9)                               | 709 (25.3)                           |                                          |
|                        | Prison 12                                                                           | 805        | 347 (43.1)                         | 212 (61.1)                           | 34 (9.8)                               | 246 (70.9)                           |                                          |
|                        | Prison 13                                                                           | 746        | 210 (28.2)                         | 15 (7.1)                             | <10 <sup>6</sup>                       | 21 (10.0)                            |                                          |
| <b>Prison category</b> |                                                                                     |            |                                    |                                      |                                        |                                      |                                          |
| 2017/18                | A                                                                                   | 1,664      | 344 (20.7)                         | 27 (7.8)                             | <10 <sup>6</sup>                       | 30 (8.7)                             |                                          |
|                        | B                                                                                   | 9,254      | 6,396 (69.1)                       | 29 (0.5)                             | 15 (0.2)                               | 44 (0.7)                             |                                          |
|                        | C                                                                                   | 6,035      | 3,666 (60.7)                       | <10 <sup>6</sup>                     | 28 (0.8)                               | 36 (1.0)                             |                                          |
|                        | Closed                                                                              | 1,720      | 887 (51.6)                         | 17 (1.9)                             | <10 <sup>6</sup>                       | 19 (2.1)                             |                                          |
|                        | D                                                                                   | 2,189      | 1,338 (61.1)                       | <10 <sup>6</sup>                     | <10 <sup>6</sup>                       | <10 <sup>6</sup>                     |                                          |
|                        | YOI                                                                                 | 815        | 441 (54.1)                         | <10 <sup>6</sup>                     | <10 <sup>6</sup>                       | <10 <sup>6</sup>                     |                                          |
| 2018/19                | A                                                                                   | 1,670      | 343 (20.5)                         | 25 (7.3)                             | 12 (3.5)                               | 37 (10.8)                            |                                          |
|                        | B                                                                                   | 9,442      | 6,097 (64.6)                       | 1,459 (23.9)                         | 48 (0.8)                               | 1,507 (24.7)                         |                                          |
|                        | C                                                                                   | 6,204      | 3,293 (53.1)                       | 844 (25.6)                           | 166 (5.0)                              | 1,010 (30.7)                         |                                          |
|                        | Closed                                                                              | 1,802      | 968 (53.7)                         | 606 (62.6)                           | <10 <sup>6</sup>                       | 613 (63.3)                           |                                          |
|                        | D                                                                                   | 2,189      | 1,323 (60.4)                       | 395 (29.9)                           | 85 (6.4)                               | 480 (36.3)                           |                                          |
|                        | YOI                                                                                 | 792        | 377 (47.6)                         | 107 (28.4)                           | 19 (5.0)                               | 126 (33.4)                           |                                          |
| 2019/20                | A                                                                                   | 1,838      | 444 (24.2)                         | 68 (15.3)                            | 49 (11.0)                              | 117 (26.4)                           |                                          |
|                        | B                                                                                   | 11,904     | 6,438 (54.1)                       | 1,722 (26.7)                         | 214 (3.3)                              | 1,936 (30.1)                         |                                          |
|                        | C                                                                                   | 6,870      | 3,153 (45.9)                       | 1,421 (45.1)                         | 492 (15.6)                             | 1,913 (60.7)                         |                                          |
|                        | Closed                                                                              | 2,245      | 1,034 (46.1)                       | 761 (73.6)                           | 22 (2.1)                               | 783 (75.7)                           |                                          |
|                        | D                                                                                   | 2,149      | 1,190 (55.4)                       | 527 (44.3)                           | 131 (11.0)                             | 658 (55.3)                           |                                          |
|                        | YOI                                                                                 | 805        | 347 (43.1)                         | 212 (61.1)                           | 34 (9.8)                               | 246 (70.9)                           |                                          |
| <b>Gender</b>          |                                                                                     |            |                                    |                                      |                                        |                                      |                                          |
| 2017/18                | F                                                                                   | 1,699      | 884 (52.0)                         | 17 (1.9)                             | <10 <sup>6</sup>                       | 19 (2.1)                             |                                          |
|                        | M                                                                                   | 19,977     | 12,187 (61.0)                      | 64 (0.5)                             | 62 (0.5)                               | 126 (1.0)                            |                                          |
| 2018/19                | F                                                                                   | 1,802      | 967 (53.7)                         | 605 (62.6)                           | <10 <sup>6</sup>                       | 612 (63.3)                           |                                          |
|                        | M                                                                                   | 20,295     | 11,432 (56.3)                      | 2,830 (24.8)                         | 330 (2.9)                              | 3,160 (27.6)                         |                                          |
| 2019/20                | F                                                                                   | 1,376      | 657 (47.7)                         | 547 (83.3)                           | <10 <sup>6</sup>                       | 552 (84.0)                           |                                          |
|                        | M                                                                                   | 23,570     | 11,574 (49.1)                      | 3,951 (34.1)                         | 920 (7.9)                              | 4,871 (42.1)                         |                                          |

<sup>1</sup>Eligible for indicator; <sup>2</sup>Achieve in current prison; <sup>3</sup>Achieve in previous prison; <sup>4</sup>Overall achievement - either current or previous prison; <sup>5</sup>Declined indicator; <sup>6</sup>Suppressed (<10) to avoid disclosure

| Indicator              | The proportion of new receptions to prison accepting opt out dry blood spot testing |                                    |                                      |                                        |                                      |                  | Community achievement 2019/20 (%):<br>NA |
|------------------------|-------------------------------------------------------------------------------------|------------------------------------|--------------------------------------|----------------------------------------|--------------------------------------|------------------|------------------------------------------|
|                        | Group: Communicable Disease                                                         |                                    |                                      |                                        |                                      |                  |                                          |
| Variable               | Population                                                                          | Eligible <sup>1</sup><br>(% popln) | Satisfy <sup>2</sup><br>(% eligible) | Elsewhere <sup>3</sup><br>(% eligible) | Achieve <sup>4</sup><br>(% eligible) |                  |                                          |
| <b>Sentence Status</b> |                                                                                     |                                    |                                      |                                        |                                      |                  |                                          |
| 2017/18                | .                                                                                   | 81                                 | <10 <sup>6</sup>                     | <10 <sup>6</sup>                       | <10 <sup>6</sup>                     | <10 <sup>6</sup> |                                          |
|                        | Absconded                                                                           | <10 <sup>6</sup>                   | <10 <sup>6</sup>                     | <10 <sup>6</sup>                       | <10 <sup>6</sup>                     | <10 <sup>6</sup> |                                          |
|                        | Active In                                                                           | 15,872                             | 9,626 (60.6)                         | 76 (0.8)                               | 59 (0.6)                             | 135 (1.4)        |                                          |
|                        | Active Out                                                                          | 1,052                              | 551 (52.4)                           | <10 <sup>6</sup>                       | <10 <sup>6</sup>                     | <10 <sup>6</sup> |                                          |
|                        | Convicted Sentence                                                                  | 2,125                              | 1,355 (63.8)                         | <10 <sup>6</sup>                       | <10 <sup>6</sup>                     | <10 <sup>6</sup> |                                          |
|                        | Downgrade in security category                                                      | <10 <sup>6</sup>                   | <10 <sup>6</sup>                     | <10 <sup>6</sup>                       | <10 <sup>6</sup>                     | <10 <sup>6</sup> |                                          |
|                        | Internal Cell Move                                                                  | <10 <sup>6</sup>                   | <10 <sup>6</sup>                     | <10 <sup>6</sup>                       | <10 <sup>6</sup>                     | <10 <sup>6</sup> |                                          |
|                        | Judges Remand                                                                       | 92                                 | 23 (25.0)                            | <10 <sup>6</sup>                       | <10 <sup>6</sup>                     | <10 <sup>6</sup> |                                          |
|                        | Licence Revoke                                                                      | 52                                 | 50 (96.2)                            | <10 <sup>6</sup>                       | <10 <sup>6</sup>                     | <10 <sup>6</sup> |                                          |
|                        | On Remand                                                                           | 1,492                              | 964 (64.6)                           | <10 <sup>6</sup>                       | <10 <sup>6</sup>                     | <10 <sup>6</sup> |                                          |
|                        | Transfer                                                                            | 910                                | 499 (54.8)                           | <10 <sup>6</sup>                       | <10 <sup>6</sup>                     | <10 <sup>6</sup> |                                          |
|                        | Upgrade in security category                                                        | <10 <sup>6</sup>                   | <10 <sup>6</sup>                     | <10 <sup>6</sup>                       | <10 <sup>6</sup>                     | <10 <sup>6</sup> |                                          |
| 2018/19                | .                                                                                   | 88                                 | <10 <sup>6</sup>                     | <10 <sup>6</sup>                       | <10 <sup>6</sup>                     | <10 <sup>6</sup> |                                          |
|                        | Absconded                                                                           | <10 <sup>6</sup>                   | <10 <sup>6</sup>                     | <10 <sup>6</sup>                       | <10 <sup>6</sup>                     | <10 <sup>6</sup> |                                          |
|                        | Active In                                                                           | 18,145                             | 10,090 (55.6)                        | 2,433 (24.1)                           | 321 (3.2)                            | 2,754 (27.3)     |                                          |
|                        | Active Out                                                                          | 835                                | 499 (59.8)                           | 81 (16.2)                              | <10 <sup>6</sup>                     | 87 (17.4)        |                                          |
|                        | Convicted Sentence                                                                  | 1,320                              | 831 (63.0)                           | 427 (51.4)                             | <10 <sup>6</sup>                     | 431 (51.9)       |                                          |
|                        | Downgrade in security category                                                      | <10 <sup>6</sup>                   | <10 <sup>6</sup>                     | <10 <sup>6</sup>                       | <10 <sup>6</sup>                     | <10 <sup>6</sup> |                                          |
|                        | Internal Cell Move                                                                  | <10 <sup>6</sup>                   | <10 <sup>6</sup>                     | <10 <sup>6</sup>                       | <10 <sup>6</sup>                     | <10 <sup>6</sup> |                                          |
|                        | Judges Remand                                                                       | <10 <sup>6</sup>                   | <10 <sup>6</sup>                     | <10 <sup>6</sup>                       | <10 <sup>6</sup>                     | <10 <sup>6</sup> |                                          |
|                        | Licence Revoke                                                                      | 125                                | 67 (53.6)                            | 32 (47.8)                              | <10 <sup>6</sup>                     | 32 (47.8)        |                                          |
|                        | On Remand                                                                           | 1,059                              | 651 (61.5)                           | 384 (59.0)                             | <10 <sup>6</sup>                     | 384 (59.0)       |                                          |
|                        | Transfer                                                                            | 518                                | 254 (49.0)                           | 77 (30.3)                              | <10 <sup>6</sup>                     | 83 (32.7)        |                                          |
|                        | Upgrade in security category                                                        | <10 <sup>6</sup>                   | <10 <sup>6</sup>                     | <10 <sup>6</sup>                       | <10 <sup>6</sup>                     | <10 <sup>6</sup> |                                          |
| 2019/20                | .                                                                                   | 69                                 | <10 <sup>6</sup>                     | <10 <sup>6</sup>                       | <10 <sup>6</sup>                     | <10 <sup>6</sup> |                                          |
|                        | Absconded                                                                           | <10 <sup>6</sup>                   | <10 <sup>6</sup>                     | <10 <sup>6</sup>                       | <10 <sup>6</sup>                     | <10 <sup>6</sup> |                                          |
|                        | Active In                                                                           | 22,424                             | 10,778 (48.1)                        | 3,676 (34.1)                           | 852 (7.9)                            | 4,528 (42.0)     |                                          |
|                        | Active Out                                                                          | 625                                | 351 (56.2)                           | 106 (30.2)                             | <10 <sup>6</sup>                     | 114 (32.5)       |                                          |
|                        | Convicted Sentence                                                                  | 1,361                              | 803 (59.0)                           | 520 (64.8)                             | 40 (5.0)                             | 560 (69.7)       |                                          |
|                        | Downgrade in security category                                                      | <10 <sup>6</sup>                   | <10 <sup>6</sup>                     | <10 <sup>6</sup>                       | <10 <sup>6</sup>                     | <10 <sup>6</sup> |                                          |
|                        | Internal Cell Move                                                                  | <10 <sup>6</sup>                   | <10 <sup>6</sup>                     | <10 <sup>6</sup>                       | <10 <sup>6</sup>                     | <10 <sup>6</sup> |                                          |
|                        | Judges Remand                                                                       | 19                                 | 11 (57.9)                            | <10 <sup>6</sup>                       | <10 <sup>6</sup>                     | <10 <sup>6</sup> |                                          |
|                        | Licence Revoke                                                                      | 178                                | 82 (46.1)                            | 50 (61.0)                              | <10 <sup>6</sup>                     | 55 (67.1)        |                                          |
|                        | On Remand                                                                           | 1,031                              | 559 (54.2)                           | 350 (62.6)                             | 35 (6.3)                             | 385 (68.9)       |                                          |
|                        | Transfer                                                                            | 101                                | 20 (19.8)                            | <10 <sup>6</sup>                       | <10 <sup>6</sup>                     | <10 <sup>6</sup> |                                          |
|                        | Upgrade in security category                                                        | <10 <sup>6</sup>                   | <10 <sup>6</sup>                     | <10 <sup>6</sup>                       | <10 <sup>6</sup>                     | <10 <sup>6</sup> |                                          |
| <b>Age - years</b>     |                                                                                     |                                    |                                      |                                        |                                      |                  |                                          |
| 2017/18                | 10 - <20                                                                            | 468                                | 357 (76.3)                           | <10 <sup>6</sup>                       | <10 <sup>6</sup>                     | <10 <sup>6</sup> |                                          |
|                        | 20 - <30                                                                            | 6,994                              | 4,575 (65.4)                         | 25 (0.5)                               | 21 (0.5)                             | 46 (1.0)         |                                          |
|                        | 30 - <40                                                                            | 7,051                              | 4,315 (61.2)                         | 26 (0.6)                               | 21 (0.5)                             | 47 (1.1)         |                                          |
|                        | 40 - <50                                                                            | 4,114                              | 2,381 (57.9)                         | 13 (0.5)                               | 10 (0.4)                             | 23 (1.0)         |                                          |
|                        | 50 - <60                                                                            | 2,107                              | 1,061 (50.4)                         | <10 <sup>6</sup>                       | <10 <sup>6</sup>                     | 13 (1.2)         |                                          |
|                        | 60 - <70                                                                            | 684                                | 284 (41.5)                           | <10 <sup>6</sup>                       | <10 <sup>6</sup>                     | <10 <sup>6</sup> |                                          |
|                        | 70 - <80                                                                            | 213                                | 78 (36.6)                            | <10 <sup>6</sup>                       | <10 <sup>6</sup>                     | <10 <sup>6</sup> |                                          |
|                        | 80 - <90                                                                            | 40                                 | 20 (50.0)                            | <10 <sup>6</sup>                       | <10 <sup>6</sup>                     | <10 <sup>6</sup> |                                          |
|                        | 90 - <100                                                                           | <10 <sup>6</sup>                   | <10 <sup>6</sup>                     | <10 <sup>6</sup>                       | <10 <sup>6</sup>                     | <10 <sup>6</sup> |                                          |
|                        | 100 - <110                                                                          | <10 <sup>6</sup>                   | <10 <sup>6</sup>                     | <10 <sup>6</sup>                       | <10 <sup>6</sup>                     | <10 <sup>6</sup> |                                          |
| 2018/19                | 10 - <20                                                                            | 436                                | 319 (73.2)                           | 71 (22.3)                              | 13 (4.1)                             | 84 (26.3)        |                                          |
|                        | 20 - <30                                                                            | 7,163                              | 4,259 (59.5)                         | 1,186 (27.8)                           | 116 (2.7)                            | 1,302 (30.6)     |                                          |
|                        | 30 - <40                                                                            | 7,381                              | 4,202 (56.9)                         | 1,168 (27.8)                           | 99 (2.4)                             | 1,267 (30.2)     |                                          |
|                        | 40 - <50                                                                            | 4,180                              | 2,232 (53.4)                         | 639 (28.6)                             | 62 (2.8)                             | 701 (31.4)       |                                          |
|                        | 50 - <60                                                                            | 1,978                              | 977 (49.4)                           | 283 (29.0)                             | 31 (3.2)                             | 314 (32.1)       |                                          |
|                        | 60 - <70                                                                            | 701                                | 319 (45.5)                           | 71 (22.3)                              | 14 (4.4)                             | 85 (26.6)        |                                          |
|                        | 70 - <80                                                                            | 209                                | 76 (36.4)                            | 12 (15.8)                              | <10 <sup>6</sup>                     | 13 (17.1)        |                                          |
|                        | 80 - <90                                                                            | 45                                 | 14 (31.1)                            | <10 <sup>6</sup>                       | <10 <sup>6</sup>                     | <10 <sup>6</sup> |                                          |
|                        | 90 - <100                                                                           | <10 <sup>6</sup>                   | <10 <sup>6</sup>                     | <10 <sup>6</sup>                       | <10 <sup>6</sup>                     | <10 <sup>6</sup> |                                          |
|                        | 100 - <110                                                                          | <10 <sup>6</sup>                   | <10 <sup>6</sup>                     | <10 <sup>6</sup>                       | <10 <sup>6</sup>                     | <10 <sup>6</sup> |                                          |
| 2019/20                | 10 - <20                                                                            | 404                                | 300 (74.3)                           | 102 (34.0)                             | 22 (7.3)                             | 124 (41.3)       |                                          |
|                        | 20 - <30                                                                            | 8,064                              | 4,125 (51.2)                         | 1,557 (37.7)                           | 342 (8.3)                            | 1,899 (46.0)     |                                          |
|                        | 30 - <40                                                                            | 9,125                              | 4,460 (48.9)                         | 1,709 (38.3)                           | 303 (6.8)                            | 2,012 (45.1)     |                                          |
|                        | 40 - <50                                                                            | 4,948                              | 2,319 (46.9)                         | 862 (37.2)                             | 193 (8.3)                            | 1,055 (45.5)     |                                          |
|                        | 50 - <60                                                                            | 2,224                              | 999 (44.9)                           | 355 (35.5)                             | 54 (5.4)                             | 409 (40.9)       |                                          |
|                        | 60 - <70                                                                            | 751                                | 289 (38.5)                           | 90 (31.1)                              | 21 (7.3)                             | 111 (38.4)       |                                          |
|                        | 70 - <80                                                                            | 238                                | 94 (39.5)                            | 31 (33.0)                              | <10 <sup>6</sup>                     | 37 (39.4)        |                                          |
|                        | 80 - <90                                                                            | 53                                 | 20 (37.7)                            | <10 <sup>6</sup>                       | <10 <sup>6</sup>                     | <10 <sup>6</sup> |                                          |
|                        | 90 - <100                                                                           | <10 <sup>6</sup>                   | <10 <sup>6</sup>                     | <10 <sup>6</sup>                       | <10 <sup>6</sup>                     | <10 <sup>6</sup> |                                          |
|                        | 100 - <110                                                                          | <10 <sup>6</sup>                   | <10 <sup>6</sup>                     | <10 <sup>6</sup>                       | <10 <sup>6</sup>                     | <10 <sup>6</sup> |                                          |

<sup>1</sup>Eligible for indicator; <sup>2</sup>Achieve in current prison; <sup>3</sup>Achieve in previous prison; <sup>4</sup>Overall achievement - either current or previous prison; <sup>5</sup>Declined indicator; <sup>6</sup>Suppressed (<10) to avoid disclosure

| Indicator                      |                        | The proportion of new receptions to prison accepting opt out dry blood spot testing |                                    |                                      |                                        |                                      | Community achievement 2019/20 (%):<br>NA |
|--------------------------------|------------------------|-------------------------------------------------------------------------------------|------------------------------------|--------------------------------------|----------------------------------------|--------------------------------------|------------------------------------------|
| Group: Communicable Disease    |                        | Population                                                                          | Eligible <sup>1</sup><br>(% popln) | Satisfy <sup>2</sup><br>(% eligible) | Elsewhere <sup>3</sup><br>(% eligible) | Achieve <sup>4</sup><br>(% eligible) |                                          |
| Variable                       |                        |                                                                                     |                                    |                                      |                                        |                                      |                                          |
| <b>Length of Stay (months)</b> |                        |                                                                                     |                                    |                                      |                                        |                                      |                                          |
| 2017/18                        | <1                     | 4,474                                                                               | 3,510 (78.5)                       | <10 <sup>6</sup>                     | <10 <sup>6</sup>                       | 14 (0.4)                             |                                          |
|                                | 1-<6                   | 8,075                                                                               | 5,864 (72.6)                       | 36 (0.6)                             | 20 (0.3)                               | 56 (1.0)                             |                                          |
|                                | 6-<12                  | 3,672                                                                               | 1,967 (53.6)                       | <10 <sup>6</sup>                     | 14 (0.7)                               | 21 (1.1)                             |                                          |
|                                | 12-<24                 | 2,832                                                                               | 1,126 (39.8)                       | 10 (0.9)                             | <10 <sup>6</sup>                       | 17 (1.5)                             |                                          |
|                                | 24+                    | 2,624                                                                               | 605 (23.1)                         | 23 (3.8)                             | 14 (2.3)                               | 37 (6.1)                             |                                          |
| 2018/19                        | <1                     | 4,801                                                                               | 3,468 (72.2)                       | 707 (20.4)                           | 37 (1.1)                               | 744 (21.5)                           |                                          |
|                                | 1-<6                   | 7,742                                                                               | 5,253 (67.9)                       | 1,558 (29.7)                         | 113 (2.2)                              | 1,671 (31.8)                         |                                          |
|                                | 6-<12                  | 3,616                                                                               | 1,807 (50.0)                       | 611 (33.8)                           | 63 (3.5)                               | 674 (37.3)                           |                                          |
|                                | 12-<24                 | 3,752                                                                               | 1,872 (49.9)                       | 560 (29.9)                           | 124 (6.6)                              | 684 (36.5)                           |                                          |
|                                | 24+                    | 2,188                                                                               | <10 <sup>6</sup>                   | <10 <sup>6</sup>                     | <10 <sup>6</sup>                       | <10 <sup>6</sup>                     |                                          |
| 2019/20                        | <1                     | 6,764                                                                               | 4,081 (60.3)                       | 1,058 (25.9)                         | 207 (5.1)                              | 1,265 (31.0)                         |                                          |
|                                | 1-<6                   | 10,802                                                                              | 6,697 (62.0)                       | 2,723 (40.7)                         | 586 (8.8)                              | 3,309 (49.4)                         |                                          |
|                                | 6-<12                  | 3,893                                                                               | 1,813 (46.6)                       | 922 (50.9)                           | 149 (8.2)                              | 1,071 (59.1)                         |                                          |
|                                | 12-<24                 | 2,600                                                                               | 15 (0.6)                           | <10 <sup>6</sup>                     | <10 <sup>6</sup>                       | <10 <sup>6</sup>                     |                                          |
|                                | 24+                    | 1,752                                                                               | <10 <sup>6</sup>                   | <10 <sup>6</sup>                     | <10 <sup>6</sup>                       | <10 <sup>6</sup>                     |                                          |
| <b>Ethnic Group</b>            |                        |                                                                                     |                                    |                                      |                                        |                                      |                                          |
| 2017/18                        | White                  | 15,638                                                                              | 9,346 (59.8)                       | 59 (0.6)                             | 52 (0.6)                               | 111 (1.2)                            |                                          |
|                                | Mixed                  | 431                                                                                 | 223 (51.7)                         | <10 <sup>6</sup>                     | <10 <sup>6</sup>                       | <10 <sup>6</sup>                     |                                          |
|                                | Asian or Asian British | 813                                                                                 | 472 (58.1)                         | <10 <sup>6</sup>                     | <10 <sup>6</sup>                       | <10 <sup>6</sup>                     |                                          |
|                                | Black or Black British | 404                                                                                 | 203 (50.2)                         | <10 <sup>6</sup>                     | <10 <sup>6</sup>                       | <10 <sup>6</sup>                     |                                          |
|                                | Chinese and Other      | 214                                                                                 | 118 (55.1)                         | <10 <sup>6</sup>                     | <10 <sup>6</sup>                       | <10 <sup>6</sup>                     |                                          |
|                                | Unclassified           | 372                                                                                 | 190 (51.1)                         | <10 <sup>6</sup>                     | <10 <sup>6</sup>                       | <10 <sup>6</sup>                     |                                          |
| 2018/19                        | White                  | 14,911                                                                              | 7,650 (51.3)                       | 2,235 (29.2)                         | 224 (2.9)                              | 2,459 (32.1)                         |                                          |
|                                | Mixed                  | 371                                                                                 | 186 (50.1)                         | 62 (33.3)                            | <10 <sup>6</sup>                       | 66 (35.5)                            |                                          |
|                                | Asian or Asian British | 726                                                                                 | 363 (50.0)                         | 98 (27.0)                            | 20 (5.5)                               | 118 (32.5)                           |                                          |
|                                | Black or Black British | 364                                                                                 | 173 (47.5)                         | 62 (35.8)                            | <10 <sup>6</sup>                       | 68 (39.3)                            |                                          |
|                                | Chinese and Other      | 167                                                                                 | 95 (56.9)                          | 27 (28.4)                            | <10 <sup>6</sup>                       | 27 (28.4)                            |                                          |
|                                | Unclassified           | 409                                                                                 | 202 (49.4)                         | 47 (23.3)                            | <10 <sup>6</sup>                       | 54 (26.7)                            |                                          |
| 2019/20                        | White                  | 16,606                                                                              | 7,016 (42.2)                       | 2,849 (40.6)                         | 615 (8.8)                              | 3,464 (49.4)                         |                                          |
|                                | Mixed                  | 409                                                                                 | 186 (45.5)                         | 84 (45.2)                            | 16 (8.6)                               | 100 (53.8)                           |                                          |
|                                | Asian or Asian British | 755                                                                                 | 334 (44.2)                         | 127 (38.0)                           | 23 (6.9)                               | 150 (44.9)                           |                                          |
|                                | Black or Black British | 451                                                                                 | 213 (47.2)                         | 89 (41.8)                            | 21 (9.9)                               | 110 (51.6)                           |                                          |
|                                | Chinese and Other      | 163                                                                                 | 82 (50.3)                          | 34 (41.5)                            | <10 <sup>6</sup>                       | 41 (50.0)                            |                                          |
|                                | Unclassified           | 387                                                                                 | 153 (39.5)                         | 44 (28.8)                            | 12 (7.8)                               | 56 (36.6)                            |                                          |

<sup>1</sup>Eligible for indicator; <sup>2</sup>Achieve in current prison; <sup>3</sup>Achieve in previous prison; <sup>4</sup>Overall achievement - either current or previous prison; <sup>5</sup>Declined indicator; <sup>6</sup>Suppressed (<10) to avoid disclosure

| Indicator              | The proportion of the prison population who have received one, two, three or four (course of three plus booster) Hepatitis B vaccinations in the preceding 12 months |                                                                          |                                                |                                                        |                                                             |                                                                  |              | Community achievement 2019/20 (%):<br>NA |                                                                  |
|------------------------|----------------------------------------------------------------------------------------------------------------------------------------------------------------------|--------------------------------------------------------------------------|------------------------------------------------|--------------------------------------------------------|-------------------------------------------------------------|------------------------------------------------------------------|--------------|------------------------------------------|------------------------------------------------------------------|
|                        | Group: Communicable Disease                                                                                                                                          |                                                                          |                                                |                                                        |                                                             |                                                                  |              |                                          |                                                                  |
|                        | Variable                                                                                                                                                             | Hepatitis B vaccines of the population who entered in the last 12 months |                                                |                                                        |                                                             |                                                                  |              |                                          | 1st, 2nd, 3rd and 4th Hep B<br>Satisfy <sup>2</sup> (% eligible) |
| Eligible <sup>1</sup>  |                                                                                                                                                                      | Declined <sup>5</sup> (%)                                                | 1st Hep B<br>Satisfy <sup>2</sup> (% eligible) | 1st and 2nd Hep B<br>Satisfy <sup>2</sup> (% eligible) | 1st, 2nd and 3rd Hep B<br>Satisfy <sup>2</sup> (% eligible) | 1st, 2nd, 3rd and 4th Hep B<br>Satisfy <sup>2</sup> (% eligible) |              |                                          |                                                                  |
| <b>Year</b>            |                                                                                                                                                                      |                                                                          |                                                |                                                        |                                                             |                                                                  |              |                                          |                                                                  |
|                        | 2017/18                                                                                                                                                              | 14,804                                                                   | 217 (1.5)                                      | 4,417 (29.8)                                           | 3,274 (22.1)                                                | 2,514 (17.0)                                                     | 863 (5.8)    |                                          |                                                                  |
|                        | 2018/19                                                                                                                                                              | 15,187                                                                   | 275 (1.8)                                      | 4,165 (27.4)                                           | 3,325 (21.9)                                                | 1,211 (8.0)                                                      | 1,211 (8.0)  |                                          |                                                                  |
|                        | 2019/20                                                                                                                                                              | 17,957                                                                   | 410 (2.3)                                      | 8,210 (45.7)                                           | 6,676 (37.2)                                                | 5,437 (30.3)                                                     | 2,212 (12.3) |                                          |                                                                  |
| <b>Prison</b>          |                                                                                                                                                                      |                                                                          |                                                |                                                        |                                                             |                                                                  |              |                                          |                                                                  |
| 2017/18                | Prison 1                                                                                                                                                             | 853                                                                      | <10 <sup>6</sup>                               | 227 (26.6)                                             | 182 (21.3)                                                  | 148 (17.4)                                                       | 59 (6.9)     |                                          |                                                                  |
|                        | Prison 2                                                                                                                                                             | 2,520                                                                    | 59 (2.3)                                       | 520 (20.6)                                             | 382 (15.2)                                                  | 274 (10.9)                                                       | 68 (2.7)     |                                          |                                                                  |
|                        | Prison 3                                                                                                                                                             | 1,834                                                                    | 26 (1.4)                                       | 581 (31.7)                                             | 444 (24.2)                                                  | 343 (18.7)                                                       | 153 (8.3)    |                                          |                                                                  |
|                        | Prison 4                                                                                                                                                             | 1,092                                                                    | 19 (1.7)                                       | 412 (37.7)                                             | 329 (30.1)                                                  | 278 (25.5)                                                       | 106 (9.7)    |                                          |                                                                  |
|                        | Prison 5                                                                                                                                                             | 379                                                                      | <10 <sup>6</sup>                               | 135 (35.6)                                             | 114 (30.1)                                                  | 98 (25.9)                                                        | 27 (7.1)     |                                          |                                                                  |
|                        | Prison 6                                                                                                                                                             | 990                                                                      | <10 <sup>6</sup>                               | 365 (36.9)                                             | 308 (31.1)                                                  | 257 (26.0)                                                       | 71 (7.2)     |                                          |                                                                  |
|                        | Prison 7                                                                                                                                                             | 426                                                                      | <10 <sup>6</sup>                               | 225 (52.8)                                             | 166 (39.0)                                                  | 145 (34.0)                                                       | 57 (13.4)    |                                          |                                                                  |
|                        | Prison 8                                                                                                                                                             | 803                                                                      | 21 (2.6)                                       | 319 (39.7)                                             | 244 (30.4)                                                  | 178 (22.2)                                                       | 46 (5.7)     |                                          |                                                                  |
|                        | Prison 9                                                                                                                                                             | 241                                                                      | <10 <sup>6</sup>                               | 86 (35.7)                                              | 72 (29.9)                                                   | 60 (24.9)                                                        | 28 (11.6)    |                                          |                                                                  |
|                        | Prison 10                                                                                                                                                            | 2,070                                                                    | 32 (1.5)                                       | 553 (26.7)                                             | 327 (15.8)                                                  | 208 (10.0)                                                       | 67 (3.2)     |                                          |                                                                  |
|                        | Prison 11                                                                                                                                                            | 2,980                                                                    | 26 (0.9)                                       | 809 (27.1)                                             | 558 (18.7)                                                  | 407 (13.7)                                                       | 156 (5.2)    |                                          |                                                                  |
|                        | Prison 12                                                                                                                                                            | 449                                                                      | 10 (2.2)                                       | 134 (29.8)                                             | 109 (24.3)                                                  | 87 (19.4)                                                        | 16 (3.6)     |                                          |                                                                  |
|                        | Prison 13                                                                                                                                                            | 167                                                                      | <10 <sup>6</sup>                               | 51 (30.5)                                              | 39 (23.4)                                                   | 31 (18.6)                                                        | 9 (5.4)      |                                          |                                                                  |
| 2018/19                | Prison 1                                                                                                                                                             | 868                                                                      | <10 <sup>6</sup>                               | 222 (25.6)                                             | 181 (20.9)                                                  | 76 (8.8)                                                         | 76 (8.8)     |                                          |                                                                  |
|                        | Prison 2                                                                                                                                                             | 2,087                                                                    | 57 (2.7)                                       | 392 (18.8)                                             | 306 (14.7)                                                  | 108 (5.2)                                                        | 108 (5.2)    |                                          |                                                                  |
|                        | Prison 3                                                                                                                                                             | 1,640                                                                    | 23 (1.4)                                       | 463 (28.2)                                             | 367 (22.4)                                                  | 177 (10.8)                                                       | 177 (10.8)   |                                          |                                                                  |
|                        | Prison 4                                                                                                                                                             | 1,322                                                                    | 25 (1.9)                                       | 481 (36.4)                                             | 414 (31.3)                                                  | 154 (11.6)                                                       | 154 (11.6)   |                                          |                                                                  |
|                        | Prison 5                                                                                                                                                             | 420                                                                      | <10 <sup>6</sup>                               | 145 (34.5)                                             | 120 (28.6)                                                  | 43 (10.2)                                                        | 43 (10.2)    |                                          |                                                                  |
|                        | Prison 6                                                                                                                                                             | 977                                                                      | 12 (1.2)                                       | 357 (36.5)                                             | 317 (32.4)                                                  | 90 (9.2)                                                         | 90 (9.2)     |                                          |                                                                  |
|                        | Prison 7                                                                                                                                                             | 431                                                                      | 11 (2.6)                                       | 231 (53.6)                                             | 190 (44.1)                                                  | 79 (18.3)                                                        | 79 (18.3)    |                                          |                                                                  |
|                        | Prison 8                                                                                                                                                             | 844                                                                      | 31 (3.7)                                       | 277 (32.8)                                             | 217 (25.7)                                                  | 61 (7.2)                                                         | 61 (7.2)     |                                          |                                                                  |
|                        | Prison 9                                                                                                                                                             | 250                                                                      | <10 <sup>6</sup>                               | 86 (34.4)                                              | 69 (27.6)                                                   | 38 (15.2)                                                        | 38 (15.2)    |                                          |                                                                  |
|                        | Prison 10                                                                                                                                                            | 2,266                                                                    | 70 (3.1)                                       | 434 (19.2)                                             | 300 (13.2)                                                  | 136 (6.0)                                                        | 136 (6.0)    |                                          |                                                                  |
|                        | Prison 11                                                                                                                                                            | 3,447                                                                    | 35 (1.0)                                       | 806 (23.4)                                             | 606 (17.6)                                                  | 205 (5.9)                                                        | 205 (5.9)    |                                          |                                                                  |
|                        | Prison 12                                                                                                                                                            | 450                                                                      | <10 <sup>6</sup>                               | 220 (48.9)                                             | 196 (43.6)                                                  | 25 (5.6)                                                         | 25 (5.6)     |                                          |                                                                  |
|                        | Prison 13                                                                                                                                                            | 185                                                                      | <10 <sup>6</sup>                               | 51 (27.6)                                              | 42 (22.7)                                                   | 19 (10.3)                                                        | 19 (10.3)    |                                          |                                                                  |
| 2019/20                | Prison 1                                                                                                                                                             | 927                                                                      | <10 <sup>6</sup>                               | 533 (57.5)                                             | 472 (50.9)                                                  | 414 (44.7)                                                       | 159 (17.2)   |                                          |                                                                  |
|                        | Prison 2                                                                                                                                                             | 2,419                                                                    | 62 (2.6)                                       | 748 (30.9)                                             | 574 (23.7)                                                  | 445 (18.4)                                                       | 178 (7.4)    |                                          |                                                                  |
|                        | Prison 3                                                                                                                                                             | 1,780                                                                    | 50 (2.8)                                       | 784 (44.0)                                             | 657 (36.9)                                                  | 537 (30.2)                                                       | 295 (16.6)   |                                          |                                                                  |
|                        | Prison 4                                                                                                                                                             | 1,522                                                                    | 50 (3.3)                                       | 847 (55.7)                                             | 723 (47.5)                                                  | 615 (40.4)                                                       | 274 (18.0)   |                                          |                                                                  |
|                        | Prison 5                                                                                                                                                             | 354                                                                      | <10 <sup>6</sup>                               | 182 (51.4)                                             | 160 (45.2)                                                  | 143 (40.4)                                                       | 51 (14.4)    |                                          |                                                                  |
|                        | Prison 6                                                                                                                                                             | 904                                                                      | <10 <sup>6</sup>                               | 504 (55.8)                                             | 441 (48.8)                                                  | 373 (41.3)                                                       | 135 (14.9)   |                                          |                                                                  |
|                        | Prison 7                                                                                                                                                             | 603                                                                      | 19 (3.2)                                       | 467 (77.4)                                             | 415 (68.8)                                                  | 352 (58.4)                                                       | 150 (24.9)   |                                          |                                                                  |
|                        | Prison 8                                                                                                                                                             | 1,048                                                                    | 42 (4.0)                                       | 495 (47.2)                                             | 375 (35.8)                                                  | 292 (27.9)                                                       | 115 (11.0)   |                                          |                                                                  |
|                        | Prison 9                                                                                                                                                             | 276                                                                      | <10 <sup>6</sup>                               | 147 (53.3)                                             | 122 (44.2)                                                  | 106 (38.4)                                                       | 56 (20.3)    |                                          |                                                                  |
|                        | Prison 10                                                                                                                                                            | 2,760                                                                    | 111 (4.0)                                      | 1,518 (55.0)                                           | 1,198 (43.4)                                                | 936 (33.9)                                                       | 306 (11.1)   |                                          |                                                                  |
|                        | Prison 11                                                                                                                                                            | 4,676                                                                    | 60 (1.3)                                       | 1,560 (33.4)                                           | 1,156 (24.7)                                                | 889 (19.0)                                                       | 408 (8.7)    |                                          |                                                                  |
|                        | Prison 12                                                                                                                                                            | 441                                                                      | <10 <sup>6</sup>                               | 312 (70.7)                                             | 291 (66.0)                                                  | 267 (60.5)                                                       | 57 (12.9)    |                                          |                                                                  |
|                        | Prison 13                                                                                                                                                            | 247                                                                      | <10 <sup>6</sup>                               | 113 (45.7)                                             | 92 (37.2)                                                   | 68 (27.5)                                                        | 28 (11.3)    |                                          |                                                                  |
| <b>Prison category</b> |                                                                                                                                                                      |                                                                          |                                                |                                                        |                                                             |                                                                  |              |                                          |                                                                  |
| 2017/18                | A                                                                                                                                                                    | 408                                                                      | <10 <sup>6</sup>                               | 137 (33.6)                                             | 111 (27.2)                                                  | 91 (22.3)                                                        | 37 (9.1)     |                                          |                                                                  |
|                        | B                                                                                                                                                                    | 7,570                                                                    | 117 (1.5)                                      | 1,882 (24.9)                                           | 1,267 (16.7)                                                | 889 (11.7)                                                       | 291 (3.8)    |                                          |                                                                  |
|                        | C                                                                                                                                                                    | 3,779                                                                    | 45 (1.2)                                       | 1,220 (32.3)                                           | 955 (25.3)                                                  | 769 (20.3)                                                       | 318 (8.4)    |                                          |                                                                  |
|                        | Closed                                                                                                                                                               | 1,229                                                                    | 30 (2.4)                                       | 544 (44.3)                                             | 410 (33.4)                                                  | 323 (26.3)                                                       | 103 (8.4)    |                                          |                                                                  |
|                        | YOI                                                                                                                                                                  | 449                                                                      | 10 (2.2)                                       | 134 (29.8)                                             | 109 (24.3)                                                  | 87 (19.4)                                                        | 16 (3.6)     |                                          |                                                                  |
| 2018/19                | A                                                                                                                                                                    | 435                                                                      | <10 <sup>6</sup>                               | 137 (31.5)                                             | 111 (25.5)                                                  | 57 (13.1)                                                        | 57 (13.1)    |                                          |                                                                  |
|                        | B                                                                                                                                                                    | 7,800                                                                    | 162 (2.1)                                      | 1,632 (20.9)                                           | 1,212 (15.5)                                                | 449 (5.8)                                                        | 449 (5.8)    |                                          |                                                                  |
|                        | C                                                                                                                                                                    | 3,830                                                                    | 48 (1.3)                                       | 1,166 (30.4)                                           | 962 (25.1)                                                  | 407 (10.6)                                                       | 407 (10.6)   |                                          |                                                                  |
|                        | Closed                                                                                                                                                               | 1,275                                                                    | 42 (3.3)                                       | 508 (39.8)                                             | 407 (31.9)                                                  | 140 (11.0)                                                       | 140 (11.0)   |                                          |                                                                  |
|                        | YOI                                                                                                                                                                  | 450                                                                      | <10 <sup>6</sup>                               | 220 (48.9)                                             | 196 (43.6)                                                  | 25 (5.6)                                                         | 25 (5.6)     |                                          |                                                                  |
| 2019/20                | A                                                                                                                                                                    | 523                                                                      | <10 <sup>6</sup>                               | 260 (49.7)                                             | 214 (40.9)                                                  | 174 (33.3)                                                       | 84 (16.1)    |                                          |                                                                  |
|                        | B                                                                                                                                                                    | 9,855                                                                    | 233 (2.4)                                      | 3,826 (38.8)                                           | 2,928 (29.7)                                                | 2,270 (23.0)                                                     | 892 (9.1)    |                                          |                                                                  |
|                        | C                                                                                                                                                                    | 4,229                                                                    | 100 (2.4)                                      | 2,164 (51.2)                                           | 1,852 (43.8)                                                | 1,566 (37.0)                                                     | 728 (17.2)   |                                          |                                                                  |
|                        | Closed                                                                                                                                                               | 1,651                                                                    | 61 (3.7)                                       | 962 (58.3)                                             | 790 (47.8)                                                  | 644 (39.0)                                                       | 265 (16.1)   |                                          |                                                                  |
|                        | D                                                                                                                                                                    | 1,258                                                                    | <10 <sup>6</sup>                               | 686 (54.5)                                             | 601 (47.8)                                                  | 516 (41.0)                                                       | 186 (14.8)   |                                          |                                                                  |
|                        | YOI                                                                                                                                                                  | 441                                                                      | <10 <sup>6</sup>                               | 312 (70.7)                                             | 291 (66.0)                                                  | 267 (60.5)                                                       | 57 (12.9)    |                                          |                                                                  |
| <b>Gender</b>          |                                                                                                                                                                      |                                                                          |                                                |                                                        |                                                             |                                                                  |              |                                          |                                                                  |
| 2017/18                | F                                                                                                                                                                    | 1,208                                                                    | 30 (2.5)                                       | 539 (44.6)                                             | 406 (33.6)                                                  | 321 (26.6)                                                       | 103 (8.5)    |                                          |                                                                  |
|                        | M                                                                                                                                                                    | 13,595                                                                   | 187 (1.4)                                      | 3,878 (28.5)                                           | 2,868 (21.1)                                                | 2,193 (16.1)                                                     | 760 (5.6)    |                                          |                                                                  |
| 2018/19                | F                                                                                                                                                                    | 1,275                                                                    | 42 (3.3)                                       | 508 (39.8)                                             | 407 (31.9)                                                  | 140 (11.0)                                                       | 140 (11.0)   |                                          |                                                                  |
|                        | M                                                                                                                                                                    | 13,910                                                                   | 233 (1.7)                                      | 3,657 (26.3)                                           | 2,918 (21.0)                                                | 1,071 (7.7)                                                      | 1,071 (7.7)  |                                          |                                                                  |
| 2019/20                | F                                                                                                                                                                    | 1,042                                                                    | 42 (4.0)                                       | 495 (47.5)                                             | 375 (36.0)                                                  | 292 (28.0)                                                       | 115 (11.0)   |                                          |                                                                  |
|                        | M                                                                                                                                                                    | 16,307                                                                   | 349 (2.1)                                      | 7,246 (44.4)                                           | 5,885 (36.1)                                                | 4,793 (29.4)                                                     | 1,946 (11.9) |                                          |                                                                  |

<sup>1</sup>Eligible for indicator; <sup>2</sup>Achieve in current prison; <sup>3</sup>Achieve in previous prison; <sup>4</sup>Overall achievement - either current or previous prison; <sup>5</sup>Declined indicator; <sup>6</sup>Suppressed (<10) to avoid disclosure



| Indicator                                   | The proportion of the prison population who have received one, two, three or four (course of three plus booster) Hepatitis B vaccinations in the preceding 12 months |                       |                           |                                                                          |                                                          |                                                               | Community achievement 2019/20 (%): |
|---------------------------------------------|----------------------------------------------------------------------------------------------------------------------------------------------------------------------|-----------------------|---------------------------|--------------------------------------------------------------------------|----------------------------------------------------------|---------------------------------------------------------------|------------------------------------|
|                                             | Group: Communicable Disease                                                                                                                                          |                       |                           |                                                                          |                                                          |                                                               | NA                                 |
|                                             | Variable                                                                                                                                                             | Eligible <sup>1</sup> | Declined <sup>5</sup> (%) | Hepatitis B vaccines of the population who entered in the last 12 months |                                                          |                                                               |                                    |
| 1st Hep B Satisfy <sup>2</sup> (%) eligible |                                                                                                                                                                      |                       |                           | 1st and 2nd Hep B Satisfy <sup>2</sup> (%) eligible                      | 1st, 2nd and 3rd Hep B Satisfy <sup>2</sup> (%) eligible | 1st, 2nd, 3rd and 4th Hep B Satisfy <sup>2</sup> (%) eligible |                                    |
| <b>Sentence Status</b>                      |                                                                                                                                                                      |                       |                           |                                                                          |                                                          |                                                               |                                    |
| 2017/18                                     | .                                                                                                                                                                    | 75                    | <10 <sup>6</sup>          | 18 (24.0)                                                                | 17 (22.7)                                                | 11 (14.7)                                                     | <10 <sup>6</sup>                   |
|                                             | Absconded                                                                                                                                                            | <10 <sup>6</sup>      | <10 <sup>6</sup>          | <10 <sup>6</sup>                                                         | <10 <sup>6</sup>                                         | <10 <sup>6</sup>                                              | <10 <sup>6</sup>                   |
|                                             | Active In                                                                                                                                                            | 10,623                | 146 (1.4)                 | 3,326 (31.3)                                                             | 2,494 (23.5)                                             | 1,938 (18.2)                                                  | 692 (6.5)                          |
|                                             | Active Out                                                                                                                                                           | 816                   | <10 <sup>6</sup>          | 231 (28.3)                                                               | 171 (21.0)                                               | 124 (15.2)                                                    | 41 (5.0)                           |
|                                             | Convicted Sentence                                                                                                                                                   | 1,562                 | 42 (2.7)                  | 367 (23.5)                                                               | 256 (16.4)                                               | 180 (11.5)                                                    | 56 (3.6)                           |
|                                             | Downgrade in security category                                                                                                                                       | <10 <sup>6</sup>      | <10 <sup>6</sup>          | <10 <sup>6</sup>                                                         | <10 <sup>6</sup>                                         | <10 <sup>6</sup>                                              | <10 <sup>6</sup>                   |
|                                             | Internal Cell Move                                                                                                                                                   | <10 <sup>6</sup>      | <10 <sup>6</sup>          | <10 <sup>6</sup>                                                         | <10 <sup>6</sup>                                         | <10 <sup>6</sup>                                              | <10 <sup>6</sup>                   |
|                                             | Judges Remand                                                                                                                                                        | 52                    | <10 <sup>6</sup>          | 22 (42.3)                                                                | <10 <sup>6</sup>                                         | <10 <sup>6</sup>                                              | <10 <sup>6</sup>                   |
|                                             | Licence Revoke                                                                                                                                                       | 51                    | <10 <sup>6</sup>          | 12 (23.5)                                                                | <10 <sup>6</sup>                                         | <10 <sup>6</sup>                                              | <10 <sup>6</sup>                   |
|                                             | On Remand                                                                                                                                                            | 1,067                 | 18 (1.7)                  | 246 (23.1)                                                               | 168 (15.7)                                               | 124 (11.6)                                                    | 31 (2.9)                           |
|                                             | Transfer                                                                                                                                                             | 558                   | <10 <sup>6</sup>          | 195 (34.9)                                                               | 156 (28.0)                                               | 127 (22.8)                                                    | 37 (6.6)                           |
|                                             | Upgrade in security category                                                                                                                                         | <10 <sup>6</sup>      | <10 <sup>6</sup>          | <10 <sup>6</sup>                                                         | <10 <sup>6</sup>                                         | <10 <sup>6</sup>                                              | <10 <sup>6</sup>                   |
| 2018/19                                     | .                                                                                                                                                                    | 84                    | <10 <sup>6</sup>          | 13 (15.5)                                                                | <10 <sup>6</sup>                                         | <10 <sup>6</sup>                                              | <10 <sup>6</sup>                   |
|                                             | Absconded                                                                                                                                                            | <10 <sup>6</sup>      | <10 <sup>6</sup>          | <10 <sup>6</sup>                                                         | <10 <sup>6</sup>                                         | <10 <sup>6</sup>                                              | <10 <sup>6</sup>                   |
|                                             | Active In                                                                                                                                                            | 12,307                | 216 (1.8)                 | 3,551 (28.9)                                                             | 2,857 (23.2)                                             | 1,048 (8.5)                                                   | 1,048 (8.5)                        |
|                                             | Active Out                                                                                                                                                           | 580                   | <10 <sup>6</sup>          | 134 (23.1)                                                               | 99 (17.1)                                                | 38 (6.6)                                                      | 38 (6.6)                           |
|                                             | Convicted Sentence                                                                                                                                                   | 1,050                 | 29 (2.8)                  | 217 (20.7)                                                               | 175 (16.7)                                               | 65 (6.2)                                                      | 65 (6.2)                           |
|                                             | Downgrade in security category                                                                                                                                       | <10 <sup>6</sup>      | <10 <sup>6</sup>          | <10 <sup>6</sup>                                                         | <10 <sup>6</sup>                                         | <10 <sup>6</sup>                                              | <10 <sup>6</sup>                   |
|                                             | Internal Cell Move                                                                                                                                                   | <10 <sup>6</sup>      | <10 <sup>6</sup>          | <10 <sup>6</sup>                                                         | <10 <sup>6</sup>                                         | <10 <sup>6</sup>                                              | <10 <sup>6</sup>                   |
|                                             | Judges Remand                                                                                                                                                        | <10 <sup>6</sup>      | <10 <sup>6</sup>          | <10 <sup>6</sup>                                                         | <10 <sup>6</sup>                                         | <10 <sup>6</sup>                                              | <10 <sup>6</sup>                   |
|                                             | Licence Revoke                                                                                                                                                       | 108                   | <10 <sup>6</sup>          | 28 (25.9)                                                                | 22 (20.4)                                                | <10 <sup>6</sup>                                              | <10 <sup>6</sup>                   |
|                                             | On Remand                                                                                                                                                            | 768                   | 16 (2.1)                  | 145 (18.9)                                                               | 105 (13.7)                                               | 39 (5.1)                                                      | 39 (5.1)                           |
|                                             | Transfer                                                                                                                                                             | 281                   | <10 <sup>6</sup>          | 76 (27.0)                                                                | 57 (20.3)                                                | <10 <sup>6</sup>                                              | <10 <sup>6</sup>                   |
|                                             | Upgrade in security category                                                                                                                                         | <10 <sup>6</sup>      | <10 <sup>6</sup>          | <10 <sup>6</sup>                                                         | <10 <sup>6</sup>                                         | <10 <sup>6</sup>                                              | <10 <sup>6</sup>                   |
| 2019/20                                     | .                                                                                                                                                                    | 61                    | <10 <sup>6</sup>          | 10 (16.4)                                                                | <10 <sup>6</sup>                                         | <10 <sup>6</sup>                                              | <10 <sup>6</sup>                   |
|                                             | Absconded                                                                                                                                                            | <10 <sup>6</sup>      | <10 <sup>6</sup>          | <10 <sup>6</sup>                                                         | <10 <sup>6</sup>                                         | <10 <sup>6</sup>                                              | <10 <sup>6</sup>                   |
|                                             | Active In                                                                                                                                                            | 15,308                | 353 (2.3)                 | 7,374 (48.2)                                                             | 6,022 (39.3)                                             | 4,935 (32.2)                                                  | 2,029 (13.3)                       |
|                                             | Active Out                                                                                                                                                           | 448                   | <10 <sup>6</sup>          | 183 (40.8)                                                               | 148 (33.0)                                               | 116 (25.9)                                                    | 40 (8.9)                           |
|                                             | Convicted Sentence                                                                                                                                                   | 1,148                 | 24 (2.1)                  | 337 (29.4)                                                               | 267 (23.3)                                               | 200 (17.4)                                                    | 74 (6.4)                           |
|                                             | Downgrade in security category                                                                                                                                       | <10 <sup>6</sup>      | <10 <sup>6</sup>          | <10 <sup>6</sup>                                                         | <10 <sup>6</sup>                                         | <10 <sup>6</sup>                                              | <10 <sup>6</sup>                   |
|                                             | Internal Cell Move                                                                                                                                                   | <10 <sup>6</sup>      | <10 <sup>6</sup>          | <10 <sup>6</sup>                                                         | <10 <sup>6</sup>                                         | <10 <sup>6</sup>                                              | <10 <sup>6</sup>                   |
|                                             | Judges Remand                                                                                                                                                        | 15                    | <10 <sup>6</sup>          | <10 <sup>6</sup>                                                         | <10 <sup>6</sup>                                         | <10 <sup>6</sup>                                              | <10 <sup>6</sup>                   |
|                                             | Licence Revoke                                                                                                                                                       | 156                   | <10 <sup>6</sup>          | 64 (41.0)                                                                | 50 (32.1)                                                | 37 (23.7)                                                     | 16 (10.3)                          |
|                                             | On Remand                                                                                                                                                            | 781                   | 20 (2.6)                  | 232 (29.7)                                                               | 176 (22.5)                                               | 141 (18.1)                                                    | 52 (6.7)                           |
|                                             | Transfer                                                                                                                                                             | 37                    | <10 <sup>6</sup>          | <10 <sup>6</sup>                                                         | <10 <sup>6</sup>                                         | <10 <sup>6</sup>                                              | <10 <sup>6</sup>                   |
|                                             | Upgrade in security category                                                                                                                                         | <10 <sup>6</sup>      | <10 <sup>6</sup>          | <10 <sup>6</sup>                                                         | <10 <sup>6</sup>                                         | <10 <sup>6</sup>                                              | <10 <sup>6</sup>                   |
| <b>Age - years</b>                          |                                                                                                                                                                      |                       |                           |                                                                          |                                                          |                                                               |                                    |
| 2017/18                                     | 10 - <20                                                                                                                                                             | 391                   | <10 <sup>6</sup>          | 69 (17.6)                                                                | 44 (11.3)                                                | 35 (9.0)                                                      | <10 <sup>6</sup>                   |
|                                             | 20 - <30                                                                                                                                                             | 5,022                 | 61 (1.2)                  | 1,523 (30.3)                                                             | 1,134 (22.6)                                             | 872 (17.4)                                                    | 292 (5.8)                          |
|                                             | 30 - <40                                                                                                                                                             | 4,888                 | 87 (1.8)                  | 1,495 (30.6)                                                             | 1,101 (22.5)                                             | 833 (17.0)                                                    | 292 (6.0)                          |
|                                             | 40 - <50                                                                                                                                                             | 2,744                 | 43 (1.6)                  | 805 (29.3)                                                               | 610 (22.2)                                               | 470 (17.1)                                                    | 170 (6.2)                          |
|                                             | 50 - <60                                                                                                                                                             | 1,268                 | 17 (1.3)                  | 400 (31.5)                                                               | 295 (23.3)                                               | 234 (18.5)                                                    | 76 (6.0)                           |
|                                             | 60 - <70                                                                                                                                                             | 362                   | <10 <sup>6</sup>          | 96 (26.5)                                                                | 69 (19.1)                                                | 51 (14.1)                                                     | 18 (5.0)                           |
|                                             | 70 - <80                                                                                                                                                             | 98                    | <10 <sup>6</sup>          | 24 (24.5)                                                                | 18 (18.4)                                                | 16 (16.3)                                                     | <10 <sup>6</sup>                   |
|                                             | 80 - <90                                                                                                                                                             | 26                    | <10 <sup>6</sup>          | <10 <sup>6</sup>                                                         | <10 <sup>6</sup>                                         | <10 <sup>6</sup>                                              | <10 <sup>6</sup>                   |
|                                             | 90 - <100                                                                                                                                                            | <10 <sup>6</sup>      | <10 <sup>6</sup>          | <10 <sup>6</sup>                                                         | <10 <sup>6</sup>                                         | <10 <sup>6</sup>                                              | <10 <sup>6</sup>                   |
|                                             | 100 - <110                                                                                                                                                           | <10 <sup>6</sup>      | <10 <sup>6</sup>          | <10 <sup>6</sup>                                                         | <10 <sup>6</sup>                                         | <10 <sup>6</sup>                                              | <10 <sup>6</sup>                   |
| 2018/19                                     | 10 - <20                                                                                                                                                             | 375                   | <10 <sup>6</sup>          | 110 (29.3)                                                               | 89 (23.7)                                                | 10 (2.7)                                                      | 10 (2.7)                           |
|                                             | 20 - <30                                                                                                                                                             | 5,241                 | 75 (1.4)                  | 1,496 (28.5)                                                             | 1,188 (22.7)                                             | 433 (8.3)                                                     | 433 (8.3)                          |
|                                             | 30 - <40                                                                                                                                                             | 5,204                 | 113 (2.2)                 | 1,412 (27.1)                                                             | 1,125 (21.6)                                             | 418 (8.0)                                                     | 418 (8.0)                          |
|                                             | 40 - <50                                                                                                                                                             | 2,769                 | 64 (2.3)                  | 750 (27.1)                                                               | 600 (21.7)                                               | 239 (8.6)                                                     | 239 (8.6)                          |
|                                             | 50 - <60                                                                                                                                                             | 1,133                 | 12 (1.1)                  | 296 (26.1)                                                               | 243 (21.4)                                               | 90 (7.9)                                                      | 90 (7.9)                           |
|                                             | 60 - <70                                                                                                                                                             | 364                   | <10 <sup>6</sup>          | 85 (23.4)                                                                | 68 (18.7)                                                | 17 (4.7)                                                      | 17 (4.7)                           |
|                                             | 70 - <80                                                                                                                                                             | 79                    | <10 <sup>6</sup>          | 13 (16.5)                                                                | 10 (12.7)                                                | <10 <sup>6</sup>                                              | <10 <sup>6</sup>                   |
|                                             | 80 - <90                                                                                                                                                             | 18                    | <10 <sup>6</sup>          | <10 <sup>6</sup>                                                         | <10 <sup>6</sup>                                         | <10 <sup>6</sup>                                              | <10 <sup>6</sup>                   |
|                                             | 90 - <100                                                                                                                                                            | <10 <sup>6</sup>      | <10 <sup>6</sup>          | <10 <sup>6</sup>                                                         | <10 <sup>6</sup>                                         | <10 <sup>6</sup>                                              | <10 <sup>6</sup>                   |
|                                             | 100 - <110                                                                                                                                                           | <10 <sup>6</sup>      | <10 <sup>6</sup>          | <10 <sup>6</sup>                                                         | <10 <sup>6</sup>                                         | <10 <sup>6</sup>                                              | <10 <sup>6</sup>                   |
| 2019/20                                     | 10 - <20                                                                                                                                                             | 342                   | <10 <sup>6</sup>          | 182 (53.2)                                                               | 158 (46.2)                                               | 134 (39.2)                                                    | 16 (4.7)                           |
|                                             | 20 - <30                                                                                                                                                             | 5,819                 | 91 (1.6)                  | 2,631 (45.2)                                                             | 2,185 (37.5)                                             | 1,755 (30.2)                                                  | 718 (12.3)                         |
|                                             | 30 - <40                                                                                                                                                             | 6,583                 | 197 (3.0)                 | 3,113 (47.3)                                                             | 2,508 (38.1)                                             | 2,048 (31.1)                                                  | 916 (13.9)                         |
|                                             | 40 - <50                                                                                                                                                             | 3,395                 | 92 (2.7)                  | 1,552 (45.7)                                                             | 1,226 (36.1)                                             | 1,001 (29.5)                                                  | 408 (12.0)                         |
|                                             | 50 - <60                                                                                                                                                             | 1,323                 | 24 (1.8)                  | 545 (41.2)                                                               | 449 (33.9)                                               | 371 (28.0)                                                    | 126 (9.5)                          |
|                                             | 60 - <70                                                                                                                                                             | 365                   | <10 <sup>6</sup>          | 143 (39.2)                                                               | 116 (31.8)                                               | 99 (27.1)                                                     | 19 (5.2)                           |
|                                             | 70 - <80                                                                                                                                                             | 104                   | <10 <sup>6</sup>          | 36 (34.6)                                                                | 27 (26.0)                                                | 24 (23.1)                                                     | <10 <sup>6</sup>                   |
|                                             | 80 - <90                                                                                                                                                             | 25                    | <10 <sup>6</sup>          | <10 <sup>6</sup>                                                         | <10 <sup>6</sup>                                         | <10 <sup>6</sup>                                              | <10 <sup>6</sup>                   |
|                                             | 90 - <100                                                                                                                                                            | <10 <sup>6</sup>      | <10 <sup>6</sup>          | <10 <sup>6</sup>                                                         | <10 <sup>6</sup>                                         | <10 <sup>6</sup>                                              | <10 <sup>6</sup>                   |
|                                             | 100 - <110                                                                                                                                                           | <10 <sup>6</sup>      | <10 <sup>6</sup>          | <10 <sup>6</sup>                                                         | <10 <sup>6</sup>                                         | <10 <sup>6</sup>                                              | <10 <sup>6</sup>                   |

<sup>1</sup>Eligible for indicator; <sup>2</sup>Achieve in current prison; <sup>3</sup>Achieve in previous prison; <sup>4</sup>Overall achievement - either current or previous prison; <sup>5</sup>Declined indicator; <sup>6</sup>Suppressed (<10) to avoid disclosure

| Indicator                      | The proportion of the prison population who have received one, two, three or four (course of three plus booster) Hepatitis B vaccinations in the preceding 12 months |                           |                                                                          |                                                     |                                                          |                                                               | Community achievement 2019/20 (%):<br>NA |
|--------------------------------|----------------------------------------------------------------------------------------------------------------------------------------------------------------------|---------------------------|--------------------------------------------------------------------------|-----------------------------------------------------|----------------------------------------------------------|---------------------------------------------------------------|------------------------------------------|
|                                | Group: Communicable Disease                                                                                                                                          |                           |                                                                          |                                                     |                                                          |                                                               |                                          |
| Variable                       | Eligible <sup>1</sup>                                                                                                                                                | Declined <sup>5</sup> (%) | Hepatitis B vaccines of the population who entered in the last 12 months |                                                     |                                                          |                                                               |                                          |
|                                |                                                                                                                                                                      |                           | 1st Hep B Satisfy <sup>2</sup> (% eligible)                              | 1st and 2nd Hep B Satisfy <sup>2</sup> (% eligible) | 1st, 2nd and 3rd Hep B Satisfy <sup>2</sup> (% eligible) | 1st, 2nd, 3rd and 4th Hep B Satisfy <sup>2</sup> (% eligible) |                                          |
| <b>Length of Stay (months)</b> |                                                                                                                                                                      |                           |                                                                          |                                                     |                                                          |                                                               |                                          |
| 2017/18                        | <1                                                                                                                                                                   | 4,305                     | 39 (0.9)                                                                 | 1,031 (23.9)                                        | 686 (15.9)                                               | 493 (11.5)                                                    | 182 (4.2)                                |
|                                | 1-<6                                                                                                                                                                 | 6,393                     | 99 (1.5)                                                                 | 1,901 (29.7)                                        | 1,397 (21.9)                                             | 1,056 (16.5)                                                  | 327 (5.1)                                |
|                                | 6-<12                                                                                                                                                                | 2,119                     | 31 (1.5)                                                                 | 668 (31.5)                                          | 520 (24.5)                                               | 409 (19.3)                                                    | 128 (6.0)                                |
|                                | 12-<24                                                                                                                                                               | 1,247                     | 22 (1.8)                                                                 | 477 (38.3)                                          | 392 (31.4)                                               | 322 (25.8)                                                    | 123 (9.9)                                |
|                                | 24+                                                                                                                                                                  | 740                       | 26 (3.5)                                                                 | 340 (45.9)                                          | 279 (37.7)                                               | 234 (31.6)                                                    | 103 (13.9)                               |
| 2018/19                        | <1                                                                                                                                                                   | 4,620                     | 60 (1.3)                                                                 | 878 (19.0)                                          | 638 (13.8)                                               | 229 (5.0)                                                     | 229 (5.0)                                |
|                                | 1-<6                                                                                                                                                                 | 6,311                     | 126 (2.0)                                                                | 1,626 (25.8)                                        | 1,250 (19.8)                                             | 426 (6.8)                                                     | 426 (6.8)                                |
|                                | 6-<12                                                                                                                                                                | 2,127                     | 44 (2.1)                                                                 | 670 (31.5)                                          | 559 (26.3)                                               | 183 (8.6)                                                     | 183 (8.6)                                |
|                                | 12-<24                                                                                                                                                               | 2,128                     | 45 (2.1)                                                                 | 990 (46.5)                                          | 877 (41.2)                                               | 373 (17.5)                                                    | 373 (17.5)                               |
|                                | 24+                                                                                                                                                                  | <10 <sup>6</sup>          | <10 <sup>6</sup>                                                         | <10 <sup>6</sup>                                    | <10 <sup>6</sup>                                         | <10 <sup>6</sup>                                              | <10 <sup>6</sup>                         |
| 2019/20                        | <1                                                                                                                                                                   | 6,326                     | 132 (2.1)                                                                | 2,218 (35.1)                                        | 1,610 (25.5)                                             | 1,183 (18.7)                                                  | 565 (8.9)                                |
|                                | 1-<6                                                                                                                                                                 | 9,250                     | 234 (2.5)                                                                | 4,614 (49.9)                                        | 3,848 (41.6)                                             | 3,154 (34.1)                                                  | 1,218 (13.2)                             |
|                                | 6-<12                                                                                                                                                                | 2,363                     | 44 (1.9)                                                                 | 1,368 (57.9)                                        | 1,209 (51.2)                                             | 1,091 (46.2)                                                  | 428 (18.1)                               |
|                                | 12-<24                                                                                                                                                               | 18                        | <10 <sup>6</sup>                                                         | 10 (55.6)                                           | <10 <sup>6</sup>                                         | <10 <sup>6</sup>                                              | <10 <sup>6</sup>                         |
|                                | 24+                                                                                                                                                                  | <10 <sup>6</sup>          | <10 <sup>6</sup>                                                         | <10 <sup>6</sup>                                    | <10 <sup>6</sup>                                         | <10 <sup>6</sup>                                              | <10 <sup>6</sup>                         |
| <b>Ethnic Group</b>            |                                                                                                                                                                      |                           |                                                                          |                                                     |                                                          |                                                               |                                          |
| 2017/18                        | White                                                                                                                                                                | 10,520                    | 182 (1.7)                                                                | 3,595 (34.2)                                        | 2,714 (25.8)                                             | 2,123 (20.2)                                                  | 766 (7.3)                                |
|                                | Mixed                                                                                                                                                                | 259                       | <10 <sup>6</sup>                                                         | 77 (29.7)                                           | 52 (20.1)                                                | 35 (13.5)                                                     | <10 <sup>6</sup>                         |
|                                | Asian or Asian British                                                                                                                                               | 542                       | <10 <sup>6</sup>                                                         | 189 (34.9)                                          | 134 (24.7)                                               | 106 (19.6)                                                    | 31 (5.7)                                 |
|                                | Black or Black British                                                                                                                                               | 249                       | <10 <sup>6</sup>                                                         | 62 (24.9)                                           | 42 (16.9)                                                | 34 (13.7)                                                     | <10 <sup>6</sup>                         |
|                                | Chinese and Other                                                                                                                                                    | 138                       | <10 <sup>6</sup>                                                         | 34 (24.6)                                           | 26 (18.8)                                                | 18 (13.0)                                                     | <10 <sup>6</sup>                         |
|                                | Unclassified                                                                                                                                                         | 216                       | <10 <sup>6</sup>                                                         | 56 (25.9)                                           | 41 (19.0)                                                | 24 (11.1)                                                     | 10 (4.6)                                 |
| 2018/19                        | White                                                                                                                                                                | 9,734                     | 227 (2.3)                                                                | 3,184 (32.7)                                        | 2,571 (26.4)                                             | 1,041 (10.7)                                                  | 1,041 (10.7)                             |
|                                | Mixed                                                                                                                                                                | 217                       | <10 <sup>6</sup>                                                         | 68 (31.3)                                           | 57 (26.3)                                                | 23 (10.6)                                                     | 23 (10.6)                                |
|                                | Asian or Asian British                                                                                                                                               | 439                       | <10 <sup>6</sup>                                                         | 140 (31.9)                                          | 114 (26.0)                                               | 43 (9.8)                                                      | 43 (9.8)                                 |
|                                | Black or Black British                                                                                                                                               | 227                       | <10 <sup>6</sup>                                                         | 63 (27.8)                                           | 56 (24.7)                                                | 15 (6.6)                                                      | 15 (6.6)                                 |
|                                | Chinese and Other                                                                                                                                                    | 111                       | <10 <sup>6</sup>                                                         | 28 (25.2)                                           | 23 (20.7)                                                | 6 (5.4)                                                       | <10 <sup>6</sup>                         |
|                                | Unclassified                                                                                                                                                         | 256                       | <10 <sup>6</sup>                                                         | 60 (23.4)                                           | 44 (17.2)                                                | 12 (4.7)                                                      | 12 (4.7)                                 |
| 2019/20                        | White                                                                                                                                                                | 11,251                    | 345 (3.1)                                                                | 6,011 (53.4)                                        | 5,002 (44.5)                                             | 4,148 (36.9)                                                  | 1,912 (17.0)                             |
|                                | Mixed                                                                                                                                                                | 250                       | <10 <sup>6</sup>                                                         | 136 (54.4)                                          | 112 (44.8)                                               | 90 (36.0)                                                     | 44 (17.6)                                |
|                                | Asian or Asian British                                                                                                                                               | 429                       | <10 <sup>6</sup>                                                         | 223 (52.0)                                          | 186 (43.4)                                               | 156 (36.4)                                                    | 69 (16.1)                                |
|                                | Black or Black British                                                                                                                                               | 285                       | <10 <sup>6</sup>                                                         | 142 (49.8)                                          | 119 (41.8)                                               | 96 (33.7)                                                     | 36 (12.6)                                |
|                                | Chinese and Other                                                                                                                                                    | 105                       | <10 <sup>6</sup>                                                         | 45 (42.9)                                           | 35 (33.3)                                                | 28 (26.7)                                                     | <10 <sup>6</sup>                         |
|                                | Unclassified                                                                                                                                                         | 228                       | <10 <sup>6</sup>                                                         | 93 (40.8)                                           | 76 (33.3)                                                | 57 (25.0)                                                     | 20 (8.8)                                 |

<sup>1</sup>Eligible for indicator; <sup>2</sup>Achieve in current prison; <sup>3</sup>Achieve in previous prison; <sup>4</sup>Overall achievement - either current or previous prison; <sup>5</sup>Declined indicator; <sup>6</sup>Suppressed (<10) to avoid disclosure

| Indicator                                                                                                                                       |           | The proportion of the prison population who have received one, two, three or four (course of three plus booster) Hepatitis B vaccinations in the preceding 12 months |                           |                                   |                                   |                                   |                                   | Community achievement |
|-------------------------------------------------------------------------------------------------------------------------------------------------|-----------|----------------------------------------------------------------------------------------------------------------------------------------------------------------------|---------------------------|-----------------------------------|-----------------------------------|-----------------------------------|-----------------------------------|-----------------------|
| Group: Communicable Disease                                                                                                                     |           |                                                                                                                                                                      |                           |                                   |                                   |                                   |                                   | 2019/20 (%): NA       |
| Patients resident in the study prison in the last 12 months with a clinical code added at any time indicating a history of any illicit drug use |           |                                                                                                                                                                      |                           |                                   |                                   |                                   |                                   |                       |
|                                                                                                                                                 |           |                                                                                                                                                                      |                           | 1st Hep B                         | 1st and 2nd Hep B                 | 1st, 2nd and 3rd Hep B            | 1st, 2nd, 3rd and 4th Hep B       |                       |
| Variable                                                                                                                                        |           | Eligible <sup>1</sup>                                                                                                                                                | Declined (%) <sup>5</sup> | Satisfy <sup>2</sup> (% eligible) | Satisfy <sup>2</sup> (% eligible) | Satisfy <sup>2</sup> (% eligible) | Satisfy <sup>2</sup> (% eligible) |                       |
| <b>Year</b>                                                                                                                                     |           |                                                                                                                                                                      |                           |                                   |                                   |                                   |                                   |                       |
|                                                                                                                                                 | 2017/18   | 7,755                                                                                                                                                                | 1,215 (15.7)              | 1,904 (24.6)                      | 1,904 (24.6)                      | 1,473 (19.0)                      | 563 (7.3)                         |                       |
|                                                                                                                                                 | 2018/19   | 8,168                                                                                                                                                                | 1,264 (15.5)              | 3,247 (39.8)                      | 2,471 (30.3)                      | 1,972 (24.1)                      | 784 (9.6)                         |                       |
|                                                                                                                                                 | 2019/20   | 10,207                                                                                                                                                               | 2,038 (20.0)              | 5,117 (50.1)                      | 4,176 (40.9)                      | 3,387 (33.2)                      | 1,493 (14.6)                      |                       |
| <b>Prison</b>                                                                                                                                   |           |                                                                                                                                                                      |                           |                                   |                                   |                                   |                                   |                       |
| 2017/18                                                                                                                                         | Prison 1  | 710                                                                                                                                                                  | 76 (10.7)                 | 157 (22.1)                        | 157 (22.1)                        | 127 (17.9)                        | 54 (7.6)                          |                       |
|                                                                                                                                                 | Prison 2  | 1,188                                                                                                                                                                | 478 (40.2)                | 194 (16.3)                        | 194 (16.3)                        | 138 (11.6)                        | 30 (2.5)                          |                       |
|                                                                                                                                                 | Prison 3  | 970                                                                                                                                                                  | 175 (18.0)                | 279 (28.8)                        | 279 (28.8)                        | 224 (23.1)                        | 115 (11.9)                        |                       |
|                                                                                                                                                 | Prison 4  | 684                                                                                                                                                                  | 78 (11.4)                 | 208 (30.4)                        | 208 (30.4)                        | 173 (25.3)                        | 77 (11.3)                         |                       |
|                                                                                                                                                 | Prison 5  | 73                                                                                                                                                                   | 0 (0.0)                   | 24 (32.9)                         | 24 (32.9)                         | 22 (30.1)                         | <10 <sup>6</sup>                  |                       |
|                                                                                                                                                 | Prison 6  | 592                                                                                                                                                                  | 43 (7.3)                  | 185 (31.3)                        | 185 (31.3)                        | 156 (26.4)                        | 46 (7.8)                          |                       |
|                                                                                                                                                 | Prison 7  | 286                                                                                                                                                                  | 41 (14.3)                 | 121 (42.3)                        | 121 (42.3)                        | 108 (37.8)                        | 51 (17.8)                         |                       |
|                                                                                                                                                 | Prison 8  | 382                                                                                                                                                                  | 71 (18.6)                 | 130 (34.0)                        | 130 (34.0)                        | 94 (24.6)                         | 30 (7.9)                          |                       |
|                                                                                                                                                 | Prison 9  | 65                                                                                                                                                                   | <10 <sup>6</sup>          | 19 (29.2)                         | 19 (29.2)                         | 14 (21.5)                         | <10 <sup>6</sup>                  |                       |
|                                                                                                                                                 | Prison 10 | 1,322                                                                                                                                                                | <10 <sup>6</sup>          | 251 (19.0)                        | 251 (19.0)                        | 167 (12.6)                        | 60 (4.5)                          |                       |
|                                                                                                                                                 | Prison 11 | 1,062                                                                                                                                                                | 144 (13.6)                | 231 (21.8)                        | 231 (21.8)                        | 165 (15.5)                        | 66 (6.2)                          |                       |
|                                                                                                                                                 | Prison 12 | 313                                                                                                                                                                  | 54 (17.3)                 | 80 (25.6)                         | 80 (25.6)                         | 62 (19.8)                         | 13 (4.2)                          |                       |
|                                                                                                                                                 | Prison 13 | 108                                                                                                                                                                  | 52 (48.1)                 | 25 (23.1)                         | 25 (23.1)                         | 23 (21.3)                         | <10 <sup>6</sup>                  |                       |
| 2018/19                                                                                                                                         | Prison 1  | 708                                                                                                                                                                  | 59 (8.3)                  | 234 (33.1)                        | 184 (26.0)                        | 154 (21.8)                        | 64 (9.0)                          |                       |
|                                                                                                                                                 | Prison 2  | 988                                                                                                                                                                  | 472 (47.8)                | 286 (28.9)                        | 204 (20.6)                        | 149 (15.1)                        | 52 (5.3)                          |                       |
|                                                                                                                                                 | Prison 3  | 940                                                                                                                                                                  | 93 (9.9)                  | 401 (42.7)                        | 323 (34.4)                        | 257 (27.3)                        | 144 (15.3)                        |                       |
|                                                                                                                                                 | Prison 4  | 857                                                                                                                                                                  | 145 (16.9)                | 388 (45.3)                        | 318 (37.1)                        | 277 (32.3)                        | 121 (14.1)                        |                       |
|                                                                                                                                                 | Prison 5  | 47                                                                                                                                                                   | 7 (14.9)                  | 20 (42.6)                         | 18 (38.3)                         | 12 (25.5)                         | <10 <sup>6</sup>                  |                       |
|                                                                                                                                                 | Prison 6  | 471                                                                                                                                                                  | 75 (15.9)                 | 194 (41.2)                        | 145 (30.8)                        | 132 (28.0)                        | 41 (8.7)                          |                       |
|                                                                                                                                                 | Prison 7  | 311                                                                                                                                                                  | 39 (12.5)                 | 205 (65.9)                        | 176 (56.6)                        | 150 (48.2)                        | 67 (21.5)                         |                       |
|                                                                                                                                                 | Prison 8  | 457                                                                                                                                                                  | 102 (22.3)                | 238 (52.1)                        | 177 (38.7)                        | 137 (30.0)                        | 49 (10.7)                         |                       |
|                                                                                                                                                 | Prison 9  | 81                                                                                                                                                                   | <10 <sup>6</sup>          | 44 (54.3)                         | 35 (43.2)                         | 29 (35.8)                         | 17 (21.0)                         |                       |
|                                                                                                                                                 | Prison 10 | 1,451                                                                                                                                                                | <10 <sup>6</sup>          | 536 (36.9)                        | 328 (22.6)                        | 232 (16.0)                        | 107 (7.4)                         |                       |
|                                                                                                                                                 | Prison 11 | 1,449                                                                                                                                                                | 206 (14.2)                | 498 (34.4)                        | 381 (26.3)                        | 279 (19.3)                        | 86 (5.9)                          |                       |
|                                                                                                                                                 | Prison 12 | 321                                                                                                                                                                  | 52 (16.2)                 | 177 (55.1)                        | 161 (50.2)                        | 145 (45.2)                        | 23 (7.2)                          |                       |
|                                                                                                                                                 | Prison 13 | 87                                                                                                                                                                   | 13 (14.9)                 | 26 (29.9)                         | 21 (24.1)                         | 19 (21.8)                         | <10 <sup>6</sup>                  |                       |
| 2019/20                                                                                                                                         | Prison 1  | 715                                                                                                                                                                  | 77 (10.8)                 | 408 (57.1)                        | 363 (50.8)                        | 315 (44.1)                        | 132 (18.5)                        |                       |
|                                                                                                                                                 | Prison 2  | 1,161                                                                                                                                                                | 503 (43.3)                | 374 (32.2)                        | 282 (24.3)                        | 210 (18.1)                        | 68 (5.9)                          |                       |
|                                                                                                                                                 | Prison 3  | 995                                                                                                                                                                  | 193 (19.4)                | 508 (51.1)                        | 434 (43.6)                        | 365 (36.7)                        | 216 (21.7)                        |                       |
|                                                                                                                                                 | Prison 4  | 969                                                                                                                                                                  | 190 (19.6)                | 555 (57.3)                        | 471 (48.6)                        | 401 (41.4)                        | 204 (21.1)                        |                       |
|                                                                                                                                                 | Prison 5  | 77                                                                                                                                                                   | 10 (13.0)                 | 39 (50.6)                         | 35 (45.5)                         | 31 (40.3)                         | 12 (15.6)                         |                       |
|                                                                                                                                                 | Prison 6  | 477                                                                                                                                                                  | 65 (13.6)                 | 260 (54.5)                        | 224 (47.0)                        | 191 (40.0)                        | 80 (16.8)                         |                       |
|                                                                                                                                                 | Prison 7  | 481                                                                                                                                                                  | 31 (6.4)                  | 379 (78.8)                        | 335 (69.6)                        | 284 (59.0)                        | 139 (28.9)                        |                       |
|                                                                                                                                                 | Prison 8  | 652                                                                                                                                                                  | 152 (23.3)                | 371 (56.9)                        | 276 (42.3)                        | 218 (33.4)                        | 103 (15.8)                        |                       |
|                                                                                                                                                 | Prison 9  | 137                                                                                                                                                                  | <10 <sup>6</sup>          | 77 (56.2)                         | 59 (43.1)                         | 50 (36.5)                         | 34 (24.8)                         |                       |
|                                                                                                                                                 | Prison 10 | 1,912                                                                                                                                                                | 371 (19.4)                | 1,136 (59.4)                      | 913 (47.8)                        | 716 (37.4)                        | 265 (13.9)                        |                       |
|                                                                                                                                                 | Prison 11 | 2,275                                                                                                                                                                | 407 (17.9)                | 781 (34.3)                        | 579 (25.5)                        | 422 (18.5)                        | 175 (7.7)                         |                       |
|                                                                                                                                                 | Prison 12 | 228                                                                                                                                                                  | 22 (9.6)                  | 163 (71.5)                        | 153 (67.1)                        | 145 (63.6)                        | 47 (20.6)                         |                       |
|                                                                                                                                                 | Prison 13 | 128                                                                                                                                                                  | 10 (7.8)                  | 66 (51.6)                         | 52 (40.6)                         | 39 (30.5)                         | 18 (14.1)                         |                       |
| <b>Prison category</b>                                                                                                                          |           |                                                                                                                                                                      |                           |                                   |                                   |                                   |                                   |                       |
| 2017/18                                                                                                                                         | A         | 173                                                                                                                                                                  | 55 (31.8)                 | 44 (25.4)                         | 44 (25.4)                         | 37 (21.4)                         | 14 (8.1)                          |                       |
|                                                                                                                                                 | B         | 3,572                                                                                                                                                                | 622 (17.4)                | 676 (18.9)                        | 676 (18.9)                        | 470 (13.2)                        | 156 (4.4)                         |                       |
|                                                                                                                                                 | C         | 2,364                                                                                                                                                                | 329 (13.9)                | 644 (27.2)                        | 644 (27.2)                        | 524 (22.2)                        | 246 (10.4)                        |                       |
|                                                                                                                                                 | Closed    | 668                                                                                                                                                                  | 112 (16.8)                | 251 (37.6)                        | 251 (37.6)                        | 202 (30.2)                        | 81 (12.1)                         |                       |
|                                                                                                                                                 | YOI       | 313                                                                                                                                                                  | 54 (17.3)                 | 80 (25.6)                         | 80 (25.6)                         | 62 (19.8)                         | 13 (4.2)                          |                       |
| 2018/19                                                                                                                                         | A         | 168                                                                                                                                                                  | 14 (8.3)                  | 70 (41.7)                         | 56 (33.3)                         | 48 (28.6)                         | 25 (14.9)                         |                       |
|                                                                                                                                                 | B         | 3,888                                                                                                                                                                | 678 (17.4)                | 1,320 (34.0)                      | 913 (23.5)                        | 660 (17.0)                        | 245 (6.3)                         |                       |
|                                                                                                                                                 | C         | 2,505                                                                                                                                                                | 297 (11.9)                | 1,023 (40.8)                      | 825 (32.9)                        | 688 (27.5)                        | 329 (13.1)                        |                       |
|                                                                                                                                                 | Closed    | 768                                                                                                                                                                  | 141 (18.4)                | 443 (57.7)                        | 353 (46.0)                        | 287 (37.4)                        | 116 (15.1)                        |                       |
|                                                                                                                                                 | YOI       | 321                                                                                                                                                                  | 52 (16.2)                 | 177 (55.1)                        | 161 (50.2)                        | 145 (45.2)                        | 23 (7.2)                          |                       |
| 2019/20                                                                                                                                         | A         | 265                                                                                                                                                                  | 17 (6.4)                  | 143 (54.0)                        | 111 (41.9)                        | 89 (33.6)                         | 52 (19.6)                         |                       |
|                                                                                                                                                 | B         | 5,348                                                                                                                                                                | 1,281 (24.0)              | 2,291 (42.8)                      | 1,774 (33.2)                      | 1,348 (25.2)                      | 508 (9.5)                         |                       |
|                                                                                                                                                 | C         | 2,679                                                                                                                                                                | 460 (17.2)                | 1,471 (54.9)                      | 1,268 (47.3)                      | 1,081 (40.4)                      | 552 (20.6)                        |                       |
|                                                                                                                                                 | Closed    | 1,133                                                                                                                                                                | 183 (16.2)                | 750 (66.2)                        | 611 (53.9)                        | 502 (44.3)                        | 242 (21.4)                        |                       |
|                                                                                                                                                 | D         | 554                                                                                                                                                                  | 75 (13.5)                 | 299 (54.0)                        | 259 (46.8)                        | 222 (40.1)                        | 92 (16.6)                         |                       |
|                                                                                                                                                 | YOI       | 228                                                                                                                                                                  | 22 (9.6)                  | 163 (71.5)                        | 153 (67.1)                        | 145 (63.6)                        | 47 (20.6)                         |                       |
| <b>Gender</b>                                                                                                                                   |           |                                                                                                                                                                      |                           |                                   |                                   |                                   |                                   |                       |
| 2017/18                                                                                                                                         | F         | 667                                                                                                                                                                  | 112 (16.8)                | 250 (37.5)                        | 250 (37.5)                        | 202 (30.3)                        | 81 (12.1)                         |                       |
|                                                                                                                                                 | M         | 7,088                                                                                                                                                                | 1,103 (15.6)              | 1,654 (23.3)                      | 1,654 (23.3)                      | 1,271 (17.9)                      | 482 (6.8)                         |                       |
| 2018/19                                                                                                                                         | F         | 768                                                                                                                                                                  | 141 (18.4)                | 443 (57.7)                        | 353 (46.0)                        | 287 (37.4)                        | 116 (15.1)                        |                       |
|                                                                                                                                                 | M         | 7,399                                                                                                                                                                | 1,123 (15.2)              | 2,804 (37.9)                      | 2,118 (28.6)                      | 1,685 (22.8)                      | 668 (9.0)                         |                       |
| 2019/20                                                                                                                                         | F         | 651                                                                                                                                                                  | 152 (23.3)                | 371 (57.0)                        | 276 (42.4)                        | 218 (33.5)                        | 103 (15.8)                        |                       |
|                                                                                                                                                 | M         | 9,075                                                                                                                                                                | 1,855 (20.4)              | 4,367 (48.1)                      | 3,566 (39.3)                      | 2,886 (31.8)                      | 1,251 (13.8)                      |                       |

<sup>1</sup>Eligible for indicator; <sup>2</sup>Achieve in current prison; <sup>3</sup>Achieve in previous prison; <sup>4</sup>Overall achievement - either current or previous prison; <sup>5</sup>Declined indicator; <sup>6</sup>Suppressed (<10) to avoid disclosure

| Indicator                                                                                                                                       | The proportion of the prison population who have received one, two, three or four (course of three plus booster) Hepatitis B vaccinations in the preceding 12 months |                           |                                             |                                                     |                                                          |                                                               | Community achievement |
|-------------------------------------------------------------------------------------------------------------------------------------------------|----------------------------------------------------------------------------------------------------------------------------------------------------------------------|---------------------------|---------------------------------------------|-----------------------------------------------------|----------------------------------------------------------|---------------------------------------------------------------|-----------------------|
|                                                                                                                                                 | Group: Communicable Disease                                                                                                                                          |                           |                                             |                                                     |                                                          |                                                               | 2019/20 (%): NA       |
| Patients resident in the study prison in the last 12 months with a clinical code added at any time indicating a history of any illicit drug use |                                                                                                                                                                      |                           |                                             |                                                     |                                                          |                                                               |                       |
| Variable                                                                                                                                        | Eligible <sup>1</sup>                                                                                                                                                | Declined (%) <sup>5</sup> | 1st Hep B Satisfy <sup>2</sup> (% eligible) | 1st and 2nd Hep B Satisfy <sup>2</sup> (% eligible) | 1st, 2nd and 3rd Hep B Satisfy <sup>2</sup> (% eligible) | 1st, 2nd, 3rd and 4th Hep B Satisfy <sup>2</sup> (% eligible) |                       |
| <b>Sentence Status</b>                                                                                                                          |                                                                                                                                                                      |                           |                                             |                                                     |                                                          |                                                               |                       |
| 2017/18                                                                                                                                         | .                                                                                                                                                                    | <10 <sup>0</sup>          | <10 <sup>6</sup>                            | <10 <sup>6</sup>                                    | <10 <sup>6</sup>                                         | <10 <sup>6</sup>                                              | <10 <sup>6</sup>      |
|                                                                                                                                                 | Absconded                                                                                                                                                            | <10 <sup>0</sup>          | <10 <sup>6</sup>                            | <10 <sup>6</sup>                                    | <10 <sup>6</sup>                                         | <10 <sup>6</sup>                                              | <10 <sup>6</sup>      |
|                                                                                                                                                 | Active In                                                                                                                                                            | 5,671                     | 730 (12.9)                                  | 1,481 (26.1)                                        | 1,481 (26.1)                                             | 1,165 (20.5)                                                  | 473 (8.3)             |
|                                                                                                                                                 | Active Out                                                                                                                                                           | 371                       | 42 (11.3)                                   | 87 (23.5)                                           | 87 (23.5)                                                | 60 (16.2)                                                     | 19 (5.1)              |
|                                                                                                                                                 | Convicted Sentence                                                                                                                                                   | 804                       | 234 (29.1)                                  | 150 (18.7)                                          | 150 (18.7)                                               | 100 (12.4)                                                    | 31 (3.9)              |
|                                                                                                                                                 | Downgrade in security category                                                                                                                                       | <10 <sup>0</sup>          | <10 <sup>6</sup>                            | <10 <sup>6</sup>                                    | <10 <sup>6</sup>                                         | <10 <sup>6</sup>                                              | <10 <sup>6</sup>      |
|                                                                                                                                                 | Internal Cell Move                                                                                                                                                   | <10 <sup>0</sup>          | <10 <sup>6</sup>                            | <10 <sup>6</sup>                                    | <10 <sup>6</sup>                                         | <10 <sup>6</sup>                                              | <10 <sup>6</sup>      |
|                                                                                                                                                 | Judges Remand                                                                                                                                                        | 32                        | <10 <sup>6</sup>                            | <10 <sup>6</sup>                                    | <10 <sup>6</sup>                                         | <10 <sup>6</sup>                                              | <10 <sup>6</sup>      |
|                                                                                                                                                 | Licence Revoke                                                                                                                                                       | 29                        | 14 (48.3)                                   | <10 <sup>6</sup>                                    | <10 <sup>6</sup>                                         | <10 <sup>6</sup>                                              | <10 <sup>6</sup>      |
|                                                                                                                                                 | On Remand                                                                                                                                                            | 507                       | 172 (33.9)                                  | 89 (17.6)                                           | 89 (17.6)                                                | 69 (13.6)                                                     | 16 (3.2)              |
|                                                                                                                                                 | Transfer                                                                                                                                                             | 340                       | 23 (6.8)                                    | 90 (26.5)                                           | 90 (26.5)                                                | 73 (21.5)                                                     | 22 (6.5)              |
|                                                                                                                                                 | Upgrade in security category                                                                                                                                         | <10 <sup>0</sup>          | <10 <sup>6</sup>                            | <10 <sup>6</sup>                                    | <10 <sup>6</sup>                                         | <10 <sup>6</sup>                                              | <10 <sup>6</sup>      |
| 2018/19                                                                                                                                         | .                                                                                                                                                                    | <10 <sup>0</sup>          | <10 <sup>6</sup>                            | <10 <sup>6</sup>                                    | <10 <sup>6</sup>                                         | <10 <sup>6</sup>                                              | <10 <sup>6</sup>      |
|                                                                                                                                                 | Absconded                                                                                                                                                            | <10 <sup>0</sup>          | <10 <sup>6</sup>                            | <10 <sup>6</sup>                                    | <10 <sup>6</sup>                                         | <10 <sup>6</sup>                                              | <10 <sup>6</sup>      |
|                                                                                                                                                 | Active In                                                                                                                                                            | 6,753                     | 786 (11.6)                                  | 2,793 (41.4)                                        | 2,141 (31.7)                                             | 1,733 (25.7)                                                  | 699 (10.4)            |
|                                                                                                                                                 | Active Out                                                                                                                                                           | 302                       | 24 (7.9)                                    | 98 (32.5)                                           | 72 (23.8)                                                | 49 (16.2)                                                     | 22 (7.3)              |
|                                                                                                                                                 | Convicted Sentence                                                                                                                                                   | 518                       | 221 (42.7)                                  | 176 (34.0)                                          | 130 (25.1)                                               | 104 (20.1)                                                    | 42 (8.1)              |
|                                                                                                                                                 | Downgrade in security category                                                                                                                                       | <10 <sup>0</sup>          | <10 <sup>6</sup>                            | <10 <sup>6</sup>                                    | <10 <sup>6</sup>                                         | <10 <sup>6</sup>                                              | <10 <sup>6</sup>      |
|                                                                                                                                                 | Internal Cell Move                                                                                                                                                   | <10 <sup>0</sup>          | <10 <sup>6</sup>                            | <10 <sup>6</sup>                                    | <10 <sup>6</sup>                                         | <10 <sup>6</sup>                                              | <10 <sup>6</sup>      |
|                                                                                                                                                 | Judges Remand                                                                                                                                                        | <10 <sup>0</sup>          | <10 <sup>6</sup>                            | <10 <sup>6</sup>                                    | <10 <sup>6</sup>                                         | <10 <sup>6</sup>                                              | <10 <sup>6</sup>      |
|                                                                                                                                                 | Licence Revoke                                                                                                                                                       | 60                        | 23 (38.3)                                   | 19 (31.7)                                           | 14 (23.3)                                                | <10 <sup>6</sup>                                              | <10 <sup>6</sup>      |
|                                                                                                                                                 | On Remand                                                                                                                                                            | 374                       | 179 (47.9)                                  | 103 (27.5)                                          | 72 (19.3)                                                | 45 (12.0)                                                     | 15 (4.0)              |
|                                                                                                                                                 | Transfer                                                                                                                                                             | 151                       | 27 (17.9)                                   | 55 (36.4)                                           | 41 (27.2)                                                | 31 (20.5)                                                     | <10 <sup>6</sup>      |
|                                                                                                                                                 | Upgrade in security category                                                                                                                                         | <10 <sup>0</sup>          | <10 <sup>6</sup>                            | <10 <sup>6</sup>                                    | <10 <sup>6</sup>                                         | <10 <sup>6</sup>                                              | <10 <sup>6</sup>      |
| 2019/20                                                                                                                                         | .                                                                                                                                                                    | <10 <sup>0</sup>          | <10 <sup>6</sup>                            | <10 <sup>6</sup>                                    | <10 <sup>6</sup>                                         | <10 <sup>6</sup>                                              | <10 <sup>6</sup>      |
|                                                                                                                                                 | Absconded                                                                                                                                                            | <10 <sup>0</sup>          | <10 <sup>6</sup>                            | <10 <sup>6</sup>                                    | <10 <sup>6</sup>                                         | <10 <sup>6</sup>                                              | <10 <sup>6</sup>      |
|                                                                                                                                                 | Active In                                                                                                                                                            | 8,900                     | 1,548 (17.4)                                | 4,652 (52.3)                                        | 3,812 (42.8)                                             | 3,113 (35.0)                                                  | 1,400 (15.7)          |
|                                                                                                                                                 | Active Out                                                                                                                                                           | 223                       | 47 (21.1)                                   | 105 (47.1)                                          | 88 (39.5)                                                | 66 (29.6)                                                     | 24 (10.8)             |
|                                                                                                                                                 | Convicted Sentence                                                                                                                                                   | 594                       | 257 (43.3)                                  | 189 (31.8)                                          | 148 (24.9)                                               | 112 (18.9)                                                    | 43 (7.2)              |
|                                                                                                                                                 | Downgrade in security category                                                                                                                                       | <10 <sup>0</sup>          | <10 <sup>6</sup>                            | <10 <sup>6</sup>                                    | <10 <sup>6</sup>                                         | <10 <sup>6</sup>                                              | <10 <sup>6</sup>      |
|                                                                                                                                                 | Internal Cell Move                                                                                                                                                   | <10 <sup>0</sup>          | <10 <sup>6</sup>                            | <10 <sup>6</sup>                                    | <10 <sup>6</sup>                                         | <10 <sup>6</sup>                                              | <10 <sup>6</sup>      |
|                                                                                                                                                 | Judges Remand                                                                                                                                                        | 10                        | <10 <sup>6</sup>                            | <10 <sup>6</sup>                                    | <10 <sup>6</sup>                                         | <10 <sup>6</sup>                                              | <10 <sup>6</sup>      |
|                                                                                                                                                 | Licence Revoke                                                                                                                                                       | 88                        | 27 (30.7)                                   | 37 (42.0)                                           | 26 (29.5)                                                | 17 (19.3)                                                     | <10 <sup>6</sup>      |
|                                                                                                                                                 | On Remand                                                                                                                                                            | 374                       | 155 (41.4)                                  | 127 (34.0)                                          | 99 (26.5)                                                | 77 (20.6)                                                     | 23 (6.1)              |
|                                                                                                                                                 | Transfer                                                                                                                                                             | 13                        | <10 <sup>6</sup>                            | <10 <sup>6</sup>                                    | <10 <sup>6</sup>                                         | <10 <sup>6</sup>                                              | <10 <sup>6</sup>      |
|                                                                                                                                                 | Upgrade in security category                                                                                                                                         | <10 <sup>0</sup>          | <10 <sup>6</sup>                            | <10 <sup>6</sup>                                    | <10 <sup>6</sup>                                         | <10 <sup>6</sup>                                              | <10 <sup>6</sup>      |
| <b>Age - years</b>                                                                                                                              |                                                                                                                                                                      |                           |                                             |                                                     |                                                          |                                                               |                       |
| 2017/18                                                                                                                                         | 10 - <20                                                                                                                                                             | 213                       | 39 (18.3)                                   | 25 (11.7)                                           | 25 (11.7)                                                | 19 (8.9)                                                      | <10 <sup>6</sup>      |
|                                                                                                                                                 | 20 - <30                                                                                                                                                             | 2,800                     | 429 (15.3)                                  | 723 (25.8)                                          | 723 (25.8)                                               | 563 (20.1)                                                    | 209 (7.5)             |
|                                                                                                                                                 | 30 - <40                                                                                                                                                             | 2,735                     | 407 (14.9)                                  | 675 (24.7)                                          | 675 (24.7)                                               | 517 (18.9)                                                    | 205 (7.5)             |
|                                                                                                                                                 | 40 - <50                                                                                                                                                             | 1,412                     | 231 (16.4)                                  | 338 (23.9)                                          | 338 (23.9)                                               | 260 (18.4)                                                    | 102 (7.2)             |
|                                                                                                                                                 | 50 - <60                                                                                                                                                             | 479                       | 78 (16.3)                                   | 124 (25.9)                                          | 124 (25.9)                                               | 100 (20.9)                                                    | 35 (7.3)              |
|                                                                                                                                                 | 60 - <70                                                                                                                                                             | 92                        | 25 (27.2)                                   | 13 (14.1)                                           | 13 (14.1)                                                | <10 <sup>6</sup>                                              | <10 <sup>6</sup>      |
|                                                                                                                                                 | 70 - <80                                                                                                                                                             | 16                        | <10 <sup>6</sup>                            | <10 <sup>6</sup>                                    | <10 <sup>6</sup>                                         | <10 <sup>6</sup>                                              | <10 <sup>6</sup>      |
|                                                                                                                                                 | 80 - <90                                                                                                                                                             | <10 <sup>0</sup>          | <10 <sup>6</sup>                            | <10 <sup>6</sup>                                    | <10 <sup>6</sup>                                         | <10 <sup>6</sup>                                              | <10 <sup>6</sup>      |
|                                                                                                                                                 | 90 - <100                                                                                                                                                            | <10 <sup>0</sup>          | <10 <sup>6</sup>                            | <10 <sup>6</sup>                                    | <10 <sup>6</sup>                                         | <10 <sup>6</sup>                                              | <10 <sup>6</sup>      |
|                                                                                                                                                 | 100 - <110                                                                                                                                                           | <10 <sup>0</sup>          | <10 <sup>6</sup>                            | <10 <sup>6</sup>                                    | <10 <sup>6</sup>                                         | <10 <sup>6</sup>                                              | <10 <sup>6</sup>      |
| 2018/19                                                                                                                                         | 10 - <20                                                                                                                                                             | 203                       | 32 (15.8)                                   | 94 (46.3)                                           | 70 (34.5)                                                | 61 (30.0)                                                     | <10 <sup>6</sup>      |
|                                                                                                                                                 | 20 - <30                                                                                                                                                             | 2,892                     | 448 (15.5)                                  | 1,163 (40.2)                                        | 910 (31.5)                                               | 728 (25.2)                                                    | 288 (10.0)            |
|                                                                                                                                                 | 30 - <40                                                                                                                                                             | 3,095                     | 439 (14.2)                                  | 1,256 (40.6)                                        | 938 (30.3)                                               | 740 (23.9)                                                    | 298 (9.6)             |
|                                                                                                                                                 | 40 - <50                                                                                                                                                             | 1,495                     | 262 (17.5)                                  | 556 (37.2)                                          | 420 (28.1)                                               | 334 (22.3)                                                    | 146 (9.8)             |
|                                                                                                                                                 | 50 - <60                                                                                                                                                             | 405                       | 66 (16.3)                                   | 157 (38.8)                                          | 117 (28.9)                                               | 98 (24.2)                                                     | 40 (9.9)              |
|                                                                                                                                                 | 60 - <70                                                                                                                                                             | 72                        | 16 (22.2)                                   | 18 (25.0)                                           | 13 (18.1)                                                | 10 (13.9)                                                     | <10 <sup>6</sup>      |
|                                                                                                                                                 | 70 - <80                                                                                                                                                             | <10 <sup>0</sup>          | <10 <sup>6</sup>                            | <10 <sup>6</sup>                                    | <10 <sup>6</sup>                                         | <10 <sup>6</sup>                                              | <10 <sup>6</sup>      |
|                                                                                                                                                 | 80 - <90                                                                                                                                                             | <10 <sup>0</sup>          | <10 <sup>6</sup>                            | <10 <sup>6</sup>                                    | <10 <sup>6</sup>                                         | <10 <sup>6</sup>                                              | <10 <sup>6</sup>      |
|                                                                                                                                                 | 90 - <100                                                                                                                                                            | <10 <sup>0</sup>          | <10 <sup>6</sup>                            | <10 <sup>6</sup>                                    | <10 <sup>6</sup>                                         | <10 <sup>6</sup>                                              | <10 <sup>6</sup>      |
|                                                                                                                                                 | 100 - <110                                                                                                                                                           | <10 <sup>0</sup>          | <10 <sup>6</sup>                            | <10 <sup>6</sup>                                    | <10 <sup>6</sup>                                         | <10 <sup>6</sup>                                              | <10 <sup>6</sup>      |
| 2019/20                                                                                                                                         | 10 - <20                                                                                                                                                             | 155                       | 31 (20.0)                                   | 94 (60.6)                                           | 80 (51.6)                                                | 69 (44.5)                                                     | 12 (7.7)              |
|                                                                                                                                                 | 20 - <30                                                                                                                                                             | 3,280                     | 578 (17.6)                                  | 1,646 (50.2)                                        | 1,371 (41.8)                                             | 1,098 (33.5)                                                  | 464 (14.1)            |
|                                                                                                                                                 | 30 - <40                                                                                                                                                             | 4,078                     | 810 (19.9)                                  | 2,072 (50.8)                                        | 1,693 (41.5)                                             | 1,387 (34.0)                                                  | 668 (16.4)            |
|                                                                                                                                                 | 40 - <50                                                                                                                                                             | 2,076                     | 447 (21.5)                                  | 1,028 (49.5)                                        | 808 (38.9)                                               | 649 (31.3)                                                    | 277 (13.3)            |
|                                                                                                                                                 | 50 - <60                                                                                                                                                             | 550                       | 148 (26.9)                                  | 251 (45.6)                                          | 204 (37.1)                                               | 167 (30.4)                                                    | 64 (11.6)             |
|                                                                                                                                                 | 60 - <70                                                                                                                                                             | 60                        | 20 (33.3)                                   | 24 (40.0)                                           | 19 (31.7)                                                | 16 (26.7)                                                     | <10 <sup>6</sup>      |
|                                                                                                                                                 | 70 - <80                                                                                                                                                             | <10 <sup>0</sup>          | <10 <sup>6</sup>                            | <10 <sup>6</sup>                                    | <10 <sup>6</sup>                                         | <10 <sup>6</sup>                                              | <10 <sup>6</sup>      |
|                                                                                                                                                 | 80 - <90                                                                                                                                                             | <10 <sup>0</sup>          | <10 <sup>6</sup>                            | <10 <sup>6</sup>                                    | <10 <sup>6</sup>                                         | <10 <sup>6</sup>                                              | <10 <sup>6</sup>      |
|                                                                                                                                                 | 90 - <100                                                                                                                                                            | <10 <sup>0</sup>          | <10 <sup>6</sup>                            | <10 <sup>6</sup>                                    | <10 <sup>6</sup>                                         | <10 <sup>6</sup>                                              | <10 <sup>6</sup>      |
|                                                                                                                                                 | 100 - <110                                                                                                                                                           | <10 <sup>0</sup>          | <10 <sup>6</sup>                            | <10 <sup>6</sup>                                    | <10 <sup>6</sup>                                         | <10 <sup>6</sup>                                              | <10 <sup>6</sup>      |

<sup>1</sup>Eligible for indicator; <sup>2</sup>Achieve in current prison; <sup>3</sup>Achieve in previous prison; <sup>4</sup>Overall achievement - either current or previous prison; <sup>5</sup>Declined indicator; <sup>6</sup>Suppressed (<10) to avoid disclosure

| Indicator                                                                                                                                       |                        | The proportion of the prison population who have received one, two, three or four (course of three plus booster) Hepatitis B vaccinations in the preceding 12 months |                           |                                             |                                                     |                                                          |                                                               | Community achievement |
|-------------------------------------------------------------------------------------------------------------------------------------------------|------------------------|----------------------------------------------------------------------------------------------------------------------------------------------------------------------|---------------------------|---------------------------------------------|-----------------------------------------------------|----------------------------------------------------------|---------------------------------------------------------------|-----------------------|
| Group: Communicable Disease                                                                                                                     |                        |                                                                                                                                                                      |                           |                                             |                                                     |                                                          |                                                               | 2019/20 (%): NA       |
| Patients resident in the study prison in the last 12 months with a clinical code added at any time indicating a history of any illicit drug use |                        |                                                                                                                                                                      |                           |                                             |                                                     |                                                          |                                                               |                       |
| Variable                                                                                                                                        |                        | Eligible <sup>1</sup>                                                                                                                                                | Declined (%) <sup>5</sup> | 1st Hep B Satisfy <sup>2</sup> (% eligible) | 1st and 2nd Hep B Satisfy <sup>2</sup> (% eligible) | 1st, 2nd and 3rd Hep B Satisfy <sup>2</sup> (% eligible) | 1st, 2nd, 3rd and 4th Hep B Satisfy <sup>2</sup> (% eligible) |                       |
| <b>Length of Stay (months)</b>                                                                                                                  |                        |                                                                                                                                                                      |                           |                                             |                                                     |                                                          |                                                               |                       |
| 2017/18                                                                                                                                         | <1                     | 1,984                                                                                                                                                                | 329 (16.6)                | 376 (19.0)                                  | 376 (19.0)                                          | 273 (13.8)                                               | 104 (5.2)                                                     |                       |
|                                                                                                                                                 | 1-<6                   | 3,475                                                                                                                                                                | 570 (16.4)                | 830 (23.9)                                  | 830 (23.9)                                          | 638 (18.4)                                               | 221 (6.4)                                                     |                       |
|                                                                                                                                                 | 6-<12                  | 1,206                                                                                                                                                                | 166 (13.8)                | 323 (26.8)                                  | 323 (26.8)                                          | 248 (20.6)                                               | 91 (7.5)                                                      |                       |
|                                                                                                                                                 | 12-<24                 | 731                                                                                                                                                                  | 101 (13.8)                | 245 (33.5)                                  | 245 (33.5)                                          | 202 (27.6)                                               | 90 (12.3)                                                     |                       |
|                                                                                                                                                 | 24+                    | 359                                                                                                                                                                  | 49 (13.6)                 | 130 (36.2)                                  | 130 (36.2)                                          | 112 (31.2)                                               | 57 (15.9)                                                     |                       |
| 2018/19                                                                                                                                         | <1                     | 2,232                                                                                                                                                                | 406 (18.2)                | 734 (32.9)                                  | 510 (22.8)                                          | 361 (16.2)                                               | 123 (5.5)                                                     |                       |
|                                                                                                                                                 | 1-<6                   | 3,622                                                                                                                                                                | 565 (15.6)                | 1,375 (38.0)                                | 1,018 (28.1)                                        | 789 (21.8)                                               | 306 (8.4)                                                     |                       |
|                                                                                                                                                 | 6-<12                  | 1,217                                                                                                                                                                | 175 (14.4)                | 508 (41.7)                                  | 399 (32.8)                                          | 340 (27.9)                                               | 128 (10.5)                                                    |                       |
|                                                                                                                                                 | 12-<24                 | 1,097                                                                                                                                                                | 118 (10.8)                | 630 (57.4)                                  | 544 (49.6)                                          | 482 (43.9)                                               | 227 (20.7)                                                    |                       |
|                                                                                                                                                 | 24+                    | <10 <sup>6</sup>                                                                                                                                                     | <10 <sup>6</sup>          | <10 <sup>6</sup>                            | <10 <sup>6</sup>                                    | <10 <sup>6</sup>                                         | <10 <sup>6</sup>                                              |                       |
| 2019/20                                                                                                                                         | <1                     | 3,467                                                                                                                                                                | 738 (21.3)                | 1,445 (41.7)                                | 1,077 (31.1)                                        | 791 (22.8)                                               | 375 (10.8)                                                    |                       |
|                                                                                                                                                 | 1-<6                   | 5,427                                                                                                                                                                | 1,095 (20.2)              | 2,891 (53.3)                                | 2,418 (44.6)                                        | 1,982 (36.5)                                             | 845 (15.6)                                                    |                       |
|                                                                                                                                                 | 6-<12                  | 1,301                                                                                                                                                                | 202 (15.5)                | 774 (59.5)                                  | 674 (51.8)                                          | 607 (46.7)                                               | 272 (20.9)                                                    |                       |
|                                                                                                                                                 | 12-<24                 | 12                                                                                                                                                                   | <10 <sup>6</sup>          | <10 <sup>6</sup>                            | <10 <sup>6</sup>                                    | <10 <sup>6</sup>                                         | <10 <sup>6</sup>                                              |                       |
|                                                                                                                                                 | 24+                    | <10 <sup>6</sup>                                                                                                                                                     | <10 <sup>6</sup>          | <10 <sup>6</sup>                            | <10 <sup>6</sup>                                    | <10 <sup>6</sup>                                         | <10 <sup>6</sup>                                              |                       |
| <b>Ethnic Group</b>                                                                                                                             |                        |                                                                                                                                                                      |                           |                                             |                                                     |                                                          |                                                               |                       |
| 2017/18                                                                                                                                         | White                  | 5,797                                                                                                                                                                | 896 (15.5)                | 1,616 (27.9)                                | 1,616 (27.9)                                        | 1,268 (21.9)                                             | 506 (8.7)                                                     |                       |
|                                                                                                                                                 | Mixed                  | 129                                                                                                                                                                  | 23 (17.8)                 | 34 (26.4)                                   | 34 (26.4)                                           | 23 (17.8)                                                | <10 <sup>6</sup>                                              |                       |
|                                                                                                                                                 | Asian or Asian British | 224                                                                                                                                                                  | 30 (13.4)                 | 65 (29.0)                                   | 65 (29.0)                                           | 47 (21.0)                                                | 16 (7.1)                                                      |                       |
|                                                                                                                                                 | Black or Black British | 119                                                                                                                                                                  | 24 (20.2)                 | 19 (16.0)                                   | 19 (16.0)                                           | 16 (13.4)                                                | <10 <sup>6</sup>                                              |                       |
|                                                                                                                                                 | Chinese and Other      | 43                                                                                                                                                                   | 11 (25.6)                 | 12 (27.9)                                   | 12 (27.9)                                           | <10 <sup>6</sup>                                         | <10 <sup>6</sup>                                              |                       |
|                                                                                                                                                 | Unclassified           | 113                                                                                                                                                                  | 24 (21.2)                 | 25 (22.1)                                   | 25 (22.1)                                           | 19 (16.8)                                                | <10 <sup>6</sup>                                              |                       |
| 2018/19                                                                                                                                         | White                  | 5,696                                                                                                                                                                | 977 (17.2)                | 2,599 (45.6)                                | 1,997 (35.1)                                        | 1,603 (28.1)                                             | 683 (12.0)                                                    |                       |
|                                                                                                                                                 | Mixed                  | 110                                                                                                                                                                  | 19 (17.3)                 | 45 (40.9)                                   | 37 (33.6)                                           | 30 (27.3)                                                | 15 (13.6)                                                     |                       |
|                                                                                                                                                 | Asian or Asian British | 173                                                                                                                                                                  | 21 (12.1)                 | 84 (48.6)                                   | 65 (37.6)                                           | 55 (31.8)                                                | 22 (12.7)                                                     |                       |
|                                                                                                                                                 | Black or Black British | 84                                                                                                                                                                   | 23 (27.4)                 | 35 (41.7)                                   | 26 (31.0)                                           | 23 (27.4)                                                | <10 <sup>6</sup>                                              |                       |
|                                                                                                                                                 | Chinese and Other      | 44                                                                                                                                                                   | 10 (22.7)                 | 19 (43.2)                                   | 14 (31.8)                                           | 13 (29.5)                                                | <10 <sup>6</sup>                                              |                       |
|                                                                                                                                                 | Unclassified           | 143                                                                                                                                                                  | 15 (10.5)                 | 40 (28.0)                                   | 34 (23.8)                                           | 25 (17.5)                                                | <10 <sup>6</sup>                                              |                       |
| 2019/20                                                                                                                                         | White                  | 7,158                                                                                                                                                                | 1,513 (21.1)              | 3,990 (55.7)                                | 3,294 (46.0)                                        | 2,713 (37.9)                                             | 1,318 (18.4)                                                  |                       |
|                                                                                                                                                 | Mixed                  | 122                                                                                                                                                                  | 25 (20.5)                 | 70 (57.4)                                   | 59 (48.4)                                           | 48 (39.3)                                                | 27 (22.1)                                                     |                       |
|                                                                                                                                                 | Asian or Asian British | 182                                                                                                                                                                  | 30 (16.5)                 | 110 (60.4)                                  | 97 (53.3)                                           | 82 (45.1)                                                | 40 (22.0)                                                     |                       |
|                                                                                                                                                 | Black or Black British | 124                                                                                                                                                                  | 29 (23.4)                 | 66 (53.2)                                   | 57 (46.0)                                           | 49 (39.5)                                                | 14 (11.3)                                                     |                       |
|                                                                                                                                                 | Chinese and Other      | 34                                                                                                                                                                   | <10 <sup>6</sup>          | 13 (38.2)                                   | 12 (35.3)                                           | 10 (29.4)                                                | <10 <sup>6</sup>                                              |                       |
|                                                                                                                                                 | Unclassified           | 125                                                                                                                                                                  | 18 (14.4)                 | 61 (48.8)                                   | 50 (40.0)                                           | 40 (32.0)                                                | 11 (8.8)                                                      |                       |

<sup>1</sup>Eligible for indicator; <sup>2</sup>Achieve in current prison; <sup>3</sup>Achieve in previous prison; <sup>4</sup>Overall achievement - either current or previous prison; <sup>5</sup>Declined indicator; <sup>6</sup>Suppressed (<10) to avoid disclosure

| Indicator                   |            | The proportion of people with one or more of coronary heart disease, stroke or transient ischemic attack, diabetes or chronic obstructive pulmonary disease who have received a flu vaccination between August and March |                                       |                                      |                                        |                                      | Community achievement 2019/20: CHD: 77.33%, Stroke/TIA: 74.22%, Diabetes: 72.22%, COPD 77.44% (QOF 19/20) |  |
|-----------------------------|------------|--------------------------------------------------------------------------------------------------------------------------------------------------------------------------------------------------------------------------|---------------------------------------|--------------------------------------|----------------------------------------|--------------------------------------|-----------------------------------------------------------------------------------------------------------|--|
| Group: Communicable Disease |            |                                                                                                                                                                                                                          |                                       |                                      |                                        |                                      |                                                                                                           |  |
| Variable                    | Population | Eligible <sup>1</sup><br>(% popln)                                                                                                                                                                                       | Declined <sup>5</sup><br>(% eligible) | Satisfy <sup>2</sup><br>(% eligible) | Elsewhere <sup>3</sup><br>(% eligible) | Achieve <sup>4</sup><br>(% eligible) |                                                                                                           |  |
| <b>Year</b>                 |            |                                                                                                                                                                                                                          |                                       |                                      |                                        |                                      |                                                                                                           |  |
| 2017/18                     | 21,677     | 1,300 (6.0)                                                                                                                                                                                                              | 179 (13.8)                            | 570 (43.8)                           | 4 (0.3)                                | 574 (44.2)                           |                                                                                                           |  |
| 2018/19                     | 22,099     | 1,534 (6.9)                                                                                                                                                                                                              | 237 (15.4)                            | 613 (40.0)                           | 9 (0.6)                                | 622 (40.5)                           |                                                                                                           |  |
| 2019/20                     | 25,811     | 1,752 (6.8)                                                                                                                                                                                                              | 252 (14.4)                            | 786 (44.9)                           | 1 (0.1)                                | 787 (44.9)                           |                                                                                                           |  |
| <b>Prison</b>               |            |                                                                                                                                                                                                                          |                                       |                                      |                                        |                                      |                                                                                                           |  |
| 2017/18                     | Prison 1   | 1,323                                                                                                                                                                                                                    | 53 (4.0)                              | 2 (3.8)                              | 17 (32.1)                              | 0 (0.0)                              | 17 (32.1)                                                                                                 |  |
|                             | Prison 2   | 3,261                                                                                                                                                                                                                    | 198 (6.1)                             | 33 (16.7)                            | 62 (31.3)                              | 0 (0.0)                              | 62 (31.3)                                                                                                 |  |
|                             | Prison 3   | 2,623                                                                                                                                                                                                                    | 134 (5.1)                             | 2 (1.5)                              | 87 (64.9)                              | 0 (0.0)                              | 87 (64.9)                                                                                                 |  |
|                             | Prison 4   | 2,089                                                                                                                                                                                                                    | 147 (7.0)                             | 25 (17.0)                            | 78 (53.1)                              | 0 (0.0)                              | 78 (53.1)                                                                                                 |  |
|                             | Prison 5   | 637                                                                                                                                                                                                                      | 38 (6.0)                              | 10 (26.3)                            | 18 (47.4)                              | 0 (0.0)                              | 18 (47.4)                                                                                                 |  |
|                             | Prison 6   | 1,552                                                                                                                                                                                                                    | 92 (5.9)                              | 4 (4.3)                              | 48 (52.2)                              | 4 (4.3)                              | 52 (56.5)                                                                                                 |  |
|                             | Prison 7   | 635                                                                                                                                                                                                                      | 48 (7.6)                              | 14 (29.2)                            | 22 (45.8)                              | 0 (0.0)                              | 22 (45.8)                                                                                                 |  |
|                             | Prison 8   | 1,085                                                                                                                                                                                                                    | 81 (7.5)                              | 27 (33.3)                            | 29 (35.8)                              | 0 (0.0)                              | 29 (35.8)                                                                                                 |  |
|                             | Prison 9   | 981                                                                                                                                                                                                                      | 150 (15.3)                            | 36 (24.0)                            | 87 (58.0)                              | 0 (0.0)                              | 87 (58.0)                                                                                                 |  |
|                             | Prison 10  | 2,523                                                                                                                                                                                                                    | 115 (4.6)                             | 0 (0.0)                              | 32 (27.8)                              | 0 (0.0)                              | 32 (27.8)                                                                                                 |  |
|                             | Prison 11  | 3,470                                                                                                                                                                                                                    | 158 (4.6)                             | 7 (4.4)                              | 33 (20.9)                              | 0 (0.0)                              | 33 (20.9)                                                                                                 |  |
|                             | Prison 12  | 815                                                                                                                                                                                                                      | 4 (0.5)                               | 1 (25.0)                             | 0 (0.0)                                | 0 (0.0)                              | 0 (0.0)                                                                                                   |  |
|                             | Prison 13  | 683                                                                                                                                                                                                                      | 82 (12.0)                             | 18 (22.0)                            | 57 (69.5)                              | 0 (0.0)                              | 57 (69.5)                                                                                                 |  |
| 2018/19                     | Prison 1   | 1,333                                                                                                                                                                                                                    | 49 (3.7)                              | 4 (8.2)                              | 18 (36.7)                              | 2 (4.1)                              | 20 (40.8)                                                                                                 |  |
|                             | Prison 2   | 2,705                                                                                                                                                                                                                    | 156 (5.8)                             | 33 (21.2)                            | 47 (30.1)                              | 0 (0.0)                              | 47 (30.1)                                                                                                 |  |
|                             | Prison 3   | 2,522                                                                                                                                                                                                                    | 159 (6.3)                             | 3 (1.9)                              | 90 (56.6)                              | 0 (0.0)                              | 90 (56.6)                                                                                                 |  |
|                             | Prison 4   | 2,349                                                                                                                                                                                                                    | 178 (7.6)                             | 21 (11.8)                            | 93 (52.2)                              | 0 (0.0)                              | 93 (52.2)                                                                                                 |  |
|                             | Prison 5   | 676                                                                                                                                                                                                                      | 45 (6.7)                              | 7 (15.6)                             | 0 (0.0)                                | 7 (15.6)                             | 7 (15.6)                                                                                                  |  |
|                             | Prison 6   | 1,513                                                                                                                                                                                                                    | 95 (6.3)                              | 15 (15.8)                            | 45 (47.4)                              | 0 (0.0)                              | 45 (47.4)                                                                                                 |  |
|                             | Prison 7   | 654                                                                                                                                                                                                                      | 68 (10.4)                             | 15 (22.1)                            | 32 (47.1)                              | 0 (0.0)                              | 32 (47.1)                                                                                                 |  |
|                             | Prison 8   | 1,148                                                                                                                                                                                                                    | 129 (11.2)                            | 30 (23.3)                            | 48 (37.2)                              | 0 (0.0)                              | 48 (37.2)                                                                                                 |  |
|                             | Prison 9   | 996                                                                                                                                                                                                                      | 175 (17.6)                            | 65 (37.1)                            | 89 (50.9)                              | 0 (0.0)                              | 89 (50.9)                                                                                                 |  |
|                             | Prison 10  | 2,717                                                                                                                                                                                                                    | 171 (6.3)                             | 12 (7.0)                             | 49 (28.7)                              | 0 (0.0)                              | 49 (28.7)                                                                                                 |  |
|                             | Prison 11  | 4,020                                                                                                                                                                                                                    | 222 (5.5)                             | 13 (5.9)                             | 48 (21.6)                              | 0 (0.0)                              | 48 (21.6)                                                                                                 |  |
|                             | Prison 12  | 792                                                                                                                                                                                                                      | 5 (0.6)                               | 1 (20.0)                             | 1 (20.0)                               | 0 (0.0)                              | 1 (20.0)                                                                                                  |  |
|                             | Prison 13  | 674                                                                                                                                                                                                                      | 82 (12.2)                             | 18 (22.0)                            | 53 (64.6)                              | 0 (0.0)                              | 53 (64.6)                                                                                                 |  |
| 2019/20                     | Prison 1   | 1,410                                                                                                                                                                                                                    | 75 (5.3)                              | 5 (6.7)                              | 37 (49.3)                              | 0 (0.0)                              | 37 (49.3)                                                                                                 |  |
|                             | Prison 2   | 2,979                                                                                                                                                                                                                    | 174 (5.8)                             | 27 (15.5)                            | 76 (43.7)                              | 0 (0.0)                              | 76 (43.7)                                                                                                 |  |
|                             | Prison 3   | 2,809                                                                                                                                                                                                                    | 166 (5.9)                             | 7 (4.2)                              | 108 (65.1)                             | 0 (0.0)                              | 108 (65.1)                                                                                                |  |
|                             | Prison 4   | 2,651                                                                                                                                                                                                                    | 154 (5.8)                             | 28 (18.2)                            | 84 (54.5)                              | 0 (0.0)                              | 84 (54.5)                                                                                                 |  |
|                             | Prison 5   | 616                                                                                                                                                                                                                      | 42 (6.8)                              | 5 (11.9)                             | 26 (61.9)                              | 0 (0.0)                              | 26 (61.9)                                                                                                 |  |
|                             | Prison 6   | 1,533                                                                                                                                                                                                                    | 100 (6.5)                             | 14 (14.0)                            | 46 (46.0)                              | 0 (0.0)                              | 46 (46.0)                                                                                                 |  |
|                             | Prison 7   | 860                                                                                                                                                                                                                      | 100 (11.6)                            | 12 (12.0)                            | 43 (43.0)                              | 0 (0.0)                              | 43 (43.0)                                                                                                 |  |
|                             | Prison 8   | 1,385                                                                                                                                                                                                                    | 165 (11.9)                            | 55 (33.3)                            | 54 (32.7)                              | 0 (0.0)                              | 54 (32.7)                                                                                                 |  |
|                             | Prison 9   | 1,092                                                                                                                                                                                                                    | 208 (19.0)                            | 46 (22.1)                            | 127 (61.1)                             | 1 (0.5)                              | 128 (61.5)                                                                                                |  |
|                             | Prison 10  | 3,577                                                                                                                                                                                                                    | 202 (5.6)                             | 17 (8.4)                             | 64 (31.7)                              | 0 (0.0)                              | 64 (31.7)                                                                                                 |  |
|                             | Prison 11  | 5,348                                                                                                                                                                                                                    | 267 (5.0)                             | 17 (6.4)                             | 59 (22.1)                              | 0 (0.0)                              | 59 (22.1)                                                                                                 |  |
|                             | Prison 12  | 805                                                                                                                                                                                                                      | 4 (0.5)                               | 1 (25.0)                             | 1 (25.0)                               | 0 (0.0)                              | 1 (25.0)                                                                                                  |  |
|                             | Prison 13  | 746                                                                                                                                                                                                                      | 95 (12.7)                             | 18 (18.9)                            | 61 (64.2)                              | 0 (0.0)                              | 61 (64.2)                                                                                                 |  |
| <b>Prison category</b>      |            |                                                                                                                                                                                                                          |                                       |                                      |                                        |                                      |                                                                                                           |  |
| 2017/18                     | A          | 1,664                                                                                                                                                                                                                    | 232 (13.9)                            | 54 (23.3)                            | 144 (62.1)                             | 0 (0.0)                              | 144 (62.1)                                                                                                |  |
|                             | B          | 9,254                                                                                                                                                                                                                    | 471 (5.1)                             | 40 (8.5)                             | 127 (27.0)                             | 0 (0.0)                              | 127 (27.0)                                                                                                |  |
|                             | C          | 6,035                                                                                                                                                                                                                    | 334 (5.5)                             | 29 (8.7)                             | 182 (54.5)                             | 0 (0.0)                              | 182 (54.5)                                                                                                |  |
|                             | Closed     | 1,720                                                                                                                                                                                                                    | 129 (7.5)                             | 41 (31.8)                            | 51 (39.5)                              | 0 (0.0)                              | 51 (39.5)                                                                                                 |  |
|                             | D          | 2,189                                                                                                                                                                                                                    | 130 (5.9)                             | 14 (10.8)                            | 66 (50.8)                              | 4 (3.1)                              | 70 (53.8)                                                                                                 |  |
|                             | YOI        | 815                                                                                                                                                                                                                      | 4 (0.5)                               | 1 (25.0)                             | 0 (0.0)                                | 0 (0.0)                              | 0 (0.0)                                                                                                   |  |
| 2018/19                     | A          | 1,670                                                                                                                                                                                                                    | 257 (15.4)                            | 83 (32.3)                            | 142 (55.3)                             | 0 (0.0)                              | 142 (55.3)                                                                                                |  |
|                             | B          | 9,442                                                                                                                                                                                                                    | 549 (5.8)                             | 58 (10.6)                            | 144 (26.2)                             | 0 (0.0)                              | 144 (26.2)                                                                                                |  |
|                             | C          | 6,204                                                                                                                                                                                                                    | 386 (6.2)                             | 28 (7.3)                             | 201 (52.1)                             | 2 (0.5)                              | 203 (52.6)                                                                                                |  |
|                             | Closed     | 1,802                                                                                                                                                                                                                    | 197 (10.9)                            | 45 (22.8)                            | 80 (40.6)                              | 0 (0.0)                              | 80 (40.6)                                                                                                 |  |
|                             | D          | 2,189                                                                                                                                                                                                                    | 140 (6.4)                             | 22 (15.7)                            | 45 (32.1)                              | 7 (5.0)                              | 52 (37.1)                                                                                                 |  |
|                             | YOI        | 792                                                                                                                                                                                                                      | 5 (0.6)                               | 1 (20.0)                             | 1 (20.0)                               | 0 (0.0)                              | 1 (20.0)                                                                                                  |  |
| 2019/20                     | A          | 1,838                                                                                                                                                                                                                    | 303 (16.5)                            | 64 (21.1)                            | 188 (62.0)                             | 1 (0.3)                              | 189 (62.4)                                                                                                |  |
|                             | B          | 11,904                                                                                                                                                                                                                   | 643 (5.4)                             | 61 (9.5)                             | 199 (30.9)                             | 0 (0.0)                              | 199 (30.9)                                                                                                |  |
|                             | C          | 6,870                                                                                                                                                                                                                    | 395 (5.7)                             | 40 (10.1)                            | 229 (58.0)                             | 0 (0.0)                              | 229 (58.0)                                                                                                |  |
|                             | Closed     | 2,245                                                                                                                                                                                                                    | 265 (11.8)                            | 67 (25.3)                            | 97 (36.6)                              | 0 (0.0)                              | 97 (36.6)                                                                                                 |  |
|                             | D          | 2,149                                                                                                                                                                                                                    | 142 (6.6)                             | 19 (13.4)                            | 72 (50.7)                              | 0 (0.0)                              | 72 (50.7)                                                                                                 |  |
|                             | YOI        | 805                                                                                                                                                                                                                      | 4 (0.5)                               | 1 (25.0)                             | 1 (25.0)                               | 0 (0.0)                              | 1 (25.0)                                                                                                  |  |
| <b>Gender</b>               |            |                                                                                                                                                                                                                          |                                       |                                      |                                        |                                      |                                                                                                           |  |
| 2017/18                     | F          | 1,699                                                                                                                                                                                                                    | 129 (7.6)                             | 41 (31.8)                            | 51 (39.5)                              | 0 (0.0)                              | 51 (39.5)                                                                                                 |  |
|                             | M          | 19,977                                                                                                                                                                                                                   | 1,171 (5.9)                           | 138 (11.8)                           | 519 (44.3)                             | 4 (0.3)                              | 523 (44.7)                                                                                                |  |
| 2018/19                     | F          | 1,802                                                                                                                                                                                                                    | 196 (10.9)                            | 45 (23.0)                            | 80 (40.8)                              | 0 (0.0)                              | 80 (40.8)                                                                                                 |  |
|                             | M          | 20,295                                                                                                                                                                                                                   | 1,338 (6.6)                           | 192 (14.3)                           | 533 (39.8)                             | 9 (0.7)                              | 542 (40.5)                                                                                                |  |
| 2019/20                     | F          | 1,376                                                                                                                                                                                                                    | 165 (12.0)                            | 55 (33.3)                            | 54 (32.7)                              | 0 (0.0)                              | 54 (32.7)                                                                                                 |  |
|                             | M          | 23,570                                                                                                                                                                                                                   | 1,487 (6.3)                           | 185 (12.4)                           | 689 (46.3)                             | 1 (0.1)                              | 690 (46.4)                                                                                                |  |

<sup>1</sup>Eligible for indicator; <sup>2</sup>Achieve in current prison; <sup>3</sup>Achieve in previous prison; <sup>4</sup>Overall achievement - either current or previous prison; <sup>5</sup>Declined indicator; <sup>6</sup>Suppressed (<10) to avoid disclosure

Indicator *The proportion of people with one or more of coronary heart disease, stroke or transient ischemic attack, diabetes or chronic obstructive pulmonary disease who have received a flu vaccination between August and March*

**Community achievement 2019/20: CHD: 77.33%, Stroke/TIA: 74.22%, Diabetes: 72.22%, COPD 77.44% (QOF 19/20)**

**Group: Communicable Disease**

| Variable                       | Population       | Eligible <sup>1</sup><br>(% popln) | Declined <sup>5</sup><br>(% eligible) | Satisfy <sup>2</sup><br>(% eligible) | Elsewhere <sup>3</sup><br>(% eligible) | Achieve <sup>4</sup><br>(% eligible) |
|--------------------------------|------------------|------------------------------------|---------------------------------------|--------------------------------------|----------------------------------------|--------------------------------------|
| <b>Sentence Status</b>         |                  |                                    |                                       |                                      |                                        |                                      |
| 2017/18                        | .                | 81                                 | <10 <sup>6</sup>                      | <10 <sup>6</sup>                     | <10 <sup>6</sup>                       | <10 <sup>6</sup>                     |
| Absconded                      | <10 <sup>6</sup> | <10 <sup>6</sup>                   | <10 <sup>6</sup>                      | <10 <sup>6</sup>                     | <10 <sup>6</sup>                       | <10 <sup>6</sup>                     |
| Active In                      | 15,872           | 964 (6.1)                          | 138 (14.3)                            | 461 (47.8)                           | <10 <sup>6</sup>                       | 462 (47.9)                           |
| Active Out                     | 1,052            | 62 (5.9)                           | <10 <sup>6</sup>                      | 23 (37.1)                            | <10 <sup>6</sup>                       | 24 (38.7)                            |
| Convicted Sentence             | 2,125            | 125 (5.9)                          | 12 (9.6)                              | 35 (28.0)                            | <10 <sup>6</sup>                       | 35 (28.0)                            |
| Downgrade in security category | <10 <sup>6</sup> | <10 <sup>6</sup>                   | <10 <sup>6</sup>                      | <10 <sup>6</sup>                     | <10 <sup>6</sup>                       | <10 <sup>6</sup>                     |
| Internal Cell Move             | <10 <sup>6</sup> | <10 <sup>6</sup>                   | <10 <sup>6</sup>                      | <10 <sup>6</sup>                     | <10 <sup>6</sup>                       | <10 <sup>6</sup>                     |
| Judges Remand                  | 92               | <10 <sup>6</sup>                   | <10 <sup>6</sup>                      | <10 <sup>6</sup>                     | <10 <sup>6</sup>                       | <10 <sup>6</sup>                     |
| Licence Revoke                 | 52               | <10 <sup>6</sup>                   | <10 <sup>6</sup>                      | <10 <sup>6</sup>                     | <10 <sup>6</sup>                       | <10 <sup>6</sup>                     |
| On Remand                      | 1,492            | 82 (5.5)                           | 18 (22.0)                             | 25 (30.5)                            | <10 <sup>6</sup>                       | 25 (30.5)                            |
| Transfer                       | 910              | 50 (5.5)                           | <10 <sup>6</sup>                      | 24 (48.0)                            | <10 <sup>6</sup>                       | 26 (52.0)                            |
| Upgrade in security category   | <10 <sup>6</sup> | <10 <sup>6</sup>                   | <10 <sup>6</sup>                      | <10 <sup>6</sup>                     | <10 <sup>6</sup>                       | <10 <sup>6</sup>                     |
| 2018/19                        | .                | 88                                 | <10 <sup>6</sup>                      | <10 <sup>6</sup>                     | <10 <sup>6</sup>                       | <10 <sup>6</sup>                     |
| Absconded                      | <10 <sup>6</sup> | <10 <sup>6</sup>                   | <10 <sup>6</sup>                      | <10 <sup>6</sup>                     | <10 <sup>6</sup>                       | <10 <sup>6</sup>                     |
| Active In                      | 18,145           | 1,277 (7.0)                        | 187 (14.6)                            | 542 (42.4)                           | <10 <sup>6</sup>                       | 550 (43.1)                           |
| Active Out                     | 835              | 70 (8.4)                           | 11 (15.7)                             | 18 (25.7)                            | <10 <sup>6</sup>                       | 19 (27.1)                            |
| Convicted Sentence             | 1,320            | 80 (6.1)                           | 18 (22.5)                             | 23 (28.8)                            | <10 <sup>6</sup>                       | 23 (28.8)                            |
| Downgrade in security category | <10 <sup>6</sup> | <10 <sup>6</sup>                   | <10 <sup>6</sup>                      | <10 <sup>6</sup>                     | <10 <sup>6</sup>                       | <10 <sup>6</sup>                     |
| Internal Cell Move             | <10 <sup>6</sup> | <10 <sup>6</sup>                   | <10 <sup>6</sup>                      | <10 <sup>6</sup>                     | <10 <sup>6</sup>                       | <10 <sup>6</sup>                     |
| Judges Remand                  | <10 <sup>6</sup> | <10 <sup>6</sup>                   | <10 <sup>6</sup>                      | <10 <sup>6</sup>                     | <10 <sup>6</sup>                       | <10 <sup>6</sup>                     |
| Licence Revoke                 | 125              | <10 <sup>6</sup>                   | <10 <sup>6</sup>                      | <10 <sup>6</sup>                     | <10 <sup>6</sup>                       | <10 <sup>6</sup>                     |
| On Remand                      | 1,059            | 65 (6.1)                           | 16 (24.6)                             | 19 (29.2)                            | <10 <sup>6</sup>                       | 19 (29.2)                            |
| Transfer                       | 518              | 32 (6.2)                           | <10 <sup>6</sup>                      | <10 <sup>6</sup>                     | <10 <sup>6</sup>                       | <10 <sup>6</sup>                     |
| Upgrade in security category   | <10 <sup>6</sup> | <10 <sup>6</sup>                   | <10 <sup>6</sup>                      | <10 <sup>6</sup>                     | <10 <sup>6</sup>                       | <10 <sup>6</sup>                     |
| 2019/20                        | .                | 69                                 | <10 <sup>6</sup>                      | <10 <sup>6</sup>                     | <10 <sup>6</sup>                       | <10 <sup>6</sup>                     |
| Absconded                      | <10 <sup>6</sup> | <10 <sup>6</sup>                   | <10 <sup>6</sup>                      | <10 <sup>6</sup>                     | <10 <sup>6</sup>                       | <10 <sup>6</sup>                     |
| Active In                      | 22,424           | 1,533 (6.8)                        | 225 (14.7)                            | 708 (46.2)                           | <10 <sup>6</sup>                       | 709 (46.2)                           |
| Active Out                     | 625              | 54 (8.6)                           | <10 <sup>6</sup>                      | 12 (22.2)                            | <10 <sup>6</sup>                       | 12 (22.2)                            |
| Convicted Sentence             | 1,361            | 81 (6.0)                           | 14 (17.3)                             | 34 (42.0)                            | <10 <sup>6</sup>                       | 34 (42.0)                            |
| Downgrade in security category | <10 <sup>6</sup> | <10 <sup>6</sup>                   | <10 <sup>6</sup>                      | <10 <sup>6</sup>                     | <10 <sup>6</sup>                       | <10 <sup>6</sup>                     |
| Internal Cell Move             | <10 <sup>6</sup> | <10 <sup>6</sup>                   | <10 <sup>6</sup>                      | <10 <sup>6</sup>                     | <10 <sup>6</sup>                       | <10 <sup>6</sup>                     |
| Judges Remand                  | 19               | <10 <sup>6</sup>                   | <10 <sup>6</sup>                      | <10 <sup>6</sup>                     | <10 <sup>6</sup>                       | <10 <sup>6</sup>                     |
| Licence Revoke                 | 178              | 13 (7.3)                           | <10 <sup>6</sup>                      | <10 <sup>6</sup>                     | <10 <sup>6</sup>                       | <10 <sup>6</sup>                     |
| On Remand                      | 1,031            | 61 (5.9)                           | <10 <sup>6</sup>                      | 27 (44.3)                            | <10 <sup>6</sup>                       | 27 (44.3)                            |
| Transfer                       | 101              | <10 <sup>6</sup>                   | <10 <sup>6</sup>                      | <10 <sup>6</sup>                     | <10 <sup>6</sup>                       | <10 <sup>6</sup>                     |
| Upgrade in security category   | <10 <sup>6</sup> | <10 <sup>6</sup>                   | <10 <sup>6</sup>                      | <10 <sup>6</sup>                     | <10 <sup>6</sup>                       | <10 <sup>6</sup>                     |
| <b>Age - years</b>             |                  |                                    |                                       |                                      |                                        |                                      |
| 2017/18                        | 10 - <20         | 468                                | <10 <sup>6</sup>                      | <10 <sup>6</sup>                     | <10 <sup>6</sup>                       | <10 <sup>6</sup>                     |
|                                | 20 - <30         | 6,994                              | 49 (0.7)                              | <10 <sup>6</sup>                     | 15 (30.6)                              | 15 (30.6)                            |
|                                | 30 - <40         | 7,051                              | 133 (1.9)                             | 18 (13.5)                            | 49 (36.8)                              | 49 (36.8)                            |
|                                | 40 - <50         | 4,114                              | 317 (7.7)                             | 42 (13.2)                            | 123 (38.8)                             | 123 (38.8)                           |
|                                | 50 - <60         | 2,107                              | 419 (19.9)                            | 59 (14.1)                            | 183 (43.7)                             | 185 (44.2)                           |
|                                | 60 - <70         | 684                                | 257 (37.6)                            | 38 (14.8)                            | 133 (51.8)                             | 134 (52.1)                           |
|                                | 70 - <80         | 213                                | 100 (46.9)                            | 14 (14.0)                            | 54 (54.0)                              | 55 (55.0)                            |
|                                | 80 - <90         | 40                                 | 21 (52.5)                             | <10 <sup>6</sup>                     | 13 (61.9)                              | 13 (61.9)                            |
|                                | 90 - <100        | <10 <sup>6</sup>                   | <10 <sup>6</sup>                      | <10 <sup>6</sup>                     | <10 <sup>6</sup>                       | <10 <sup>6</sup>                     |
|                                | 100 - <110       | <10 <sup>6</sup>                   | <10 <sup>6</sup>                      | <10 <sup>6</sup>                     | <10 <sup>6</sup>                       | <10 <sup>6</sup>                     |
| 2018/19                        | 10 - <20         | 436                                | <10 <sup>6</sup>                      | <10 <sup>6</sup>                     | <10 <sup>6</sup>                       | <10 <sup>6</sup>                     |
|                                | 20 - <30         | 7,163                              | 70 (1.0)                              | <10 <sup>6</sup>                     | 19 (27.1)                              | 19 (27.1)                            |
|                                | 30 - <40         | 7,381                              | 200 (2.7)                             | 23 (11.5)                            | 71 (35.5)                              | 74 (37.0)                            |
|                                | 40 - <50         | 4,180                              | 379 (9.1)                             | 63 (16.6)                            | 130 (34.3)                             | 133 (35.1)                           |
|                                | 50 - <60         | 1,978                              | 468 (23.7)                            | 82 (17.5)                            | 186 (39.7)                             | 188 (40.2)                           |
|                                | 60 - <70         | 701                                | 286 (40.8)                            | 43 (15.0)                            | 137 (47.9)                             | 137 (47.9)                           |
|                                | 70 - <80         | 209                                | 101 (48.3)                            | 13 (12.9)                            | 55 (54.5)                              | 56 (55.4)                            |
|                                | 80 - <90         | 45                                 | 28 (62.2)                             | <10 <sup>6</sup>                     | 14 (50.0)                              | 14 (50.0)                            |
|                                | 90 - <100        | <10 <sup>6</sup>                   | <10 <sup>6</sup>                      | <10 <sup>6</sup>                     | <10 <sup>6</sup>                       | <10 <sup>6</sup>                     |
|                                | 100 - <110       | <10 <sup>6</sup>                   | <10 <sup>6</sup>                      | <10 <sup>6</sup>                     | <10 <sup>6</sup>                       | <10 <sup>6</sup>                     |
| 2019/20                        | 10 - <20         | 404                                | <10 <sup>6</sup>                      | <10 <sup>6</sup>                     | <10 <sup>6</sup>                       | <10 <sup>6</sup>                     |
|                                | 20 - <30         | 8,064                              | 81 (1.0)                              | <10 <sup>6</sup>                     | 35 (43.2)                              | 35 (43.2)                            |
|                                | 30 - <40         | 9,125                              | 237 (2.6)                             | 35 (14.8)                            | 86 (36.3)                              | 86 (36.3)                            |
|                                | 40 - <50         | 4,948                              | 478 (9.7)                             | 81 (16.9)                            | 199 (41.6)                             | 199 (41.6)                           |
|                                | 50 - <60         | 2,224                              | 500 (22.5)                            | 76 (15.2)                            | 225 (45.0)                             | 225 (45.0)                           |
|                                | 60 - <70         | 751                                | 308 (41.0)                            | 37 (12.0)                            | 159 (51.6)                             | 160 (51.9)                           |
|                                | 70 - <80         | 238                                | 116 (48.7)                            | 15 (12.9)                            | 62 (53.4)                              | 62 (53.4)                            |
|                                | 80 - <90         | 53                                 | 30 (56.6)                             | <10 <sup>6</sup>                     | 19 (63.3)                              | 19 (63.3)                            |
|                                | 90 - <100        | <10 <sup>6</sup>                   | <10 <sup>6</sup>                      | <10 <sup>6</sup>                     | <10 <sup>6</sup>                       | <10 <sup>6</sup>                     |
|                                | 100 - <110       | <10 <sup>6</sup>                   | <10 <sup>6</sup>                      | <10 <sup>6</sup>                     | <10 <sup>6</sup>                       | <10 <sup>6</sup>                     |

<sup>1</sup>Eligible for indicator; <sup>2</sup>Achieve in current prison; <sup>3</sup>Achieve in previous prison; <sup>4</sup>Overall achievement - either current or previous prison; <sup>5</sup>Declined indicator; <sup>6</sup>Suppressed (<10) to avoid disclosure

| Indicator                      |                        | The proportion of people with one or more of coronary heart disease, stroke or transient ischemic attack, diabetes or chronic obstructive pulmonary disease who have received a flu vaccination between August and March |                                       |                                      |                                        |                                      | Community achievement 2019/20: CHD: 77.33%, Stroke/TIA: 74.22%, Diabetes: 72.22%, COPD 77.44% (QOF 19/20) |  |
|--------------------------------|------------------------|--------------------------------------------------------------------------------------------------------------------------------------------------------------------------------------------------------------------------|---------------------------------------|--------------------------------------|----------------------------------------|--------------------------------------|-----------------------------------------------------------------------------------------------------------|--|
| Group: Communicable Disease    |                        |                                                                                                                                                                                                                          |                                       |                                      |                                        |                                      |                                                                                                           |  |
| Variable                       | Population             | Eligible <sup>1</sup><br>(% popln)                                                                                                                                                                                       | Declined <sup>5</sup><br>(% eligible) | Satisfy <sup>2</sup><br>(% eligible) | Elsewhere <sup>3</sup><br>(% eligible) | Achieve <sup>4</sup><br>(% eligible) |                                                                                                           |  |
| <b>Length of Stay (months)</b> |                        |                                                                                                                                                                                                                          |                                       |                                      |                                        |                                      |                                                                                                           |  |
| 2017/18                        | <1                     | 4,474                                                                                                                                                                                                                    | 173 (3.9)                             | 18 (10.4)                            | 23 (13.3)                              | <10 <sup>6</sup>                     | 23 (13.3)                                                                                                 |  |
|                                | 1-<6                   | 8,075                                                                                                                                                                                                                    | 367 (4.5)                             | 38 (10.4)                            | 104 (28.3)                             | <10 <sup>6</sup>                     | 105 (28.6)                                                                                                |  |
|                                | 6-<12                  | 3,672                                                                                                                                                                                                                    | 193 (5.3)                             | 23 (11.9)                            | 80 (41.5)                              | <10 <sup>6</sup>                     | 82 (42.5)                                                                                                 |  |
|                                | 12-<24                 | 2,832                                                                                                                                                                                                                    | 180 (6.4)                             | 27 (15.0)                            | 104 (57.8)                             | <10 <sup>6</sup>                     | 105 (58.3)                                                                                                |  |
|                                | 24+                    | 2,624                                                                                                                                                                                                                    | 387 (14.7)                            | 73 (18.9)                            | 259 (66.9)                             | <10 <sup>6</sup>                     | 259 (66.9)                                                                                                |  |
| 2018/19                        | <1                     | 4,801                                                                                                                                                                                                                    | 249 (5.2)                             | 25 (10.0)                            | 40 (16.1)                              | <10 <sup>6</sup>                     | 40 (16.1)                                                                                                 |  |
|                                | 1-<6                   | 7,742                                                                                                                                                                                                                    | 435 (5.6)                             | 58 (13.3)                            | 120 (27.6)                             | <10 <sup>6</sup>                     | 123 (28.3)                                                                                                |  |
|                                | 6-<12                  | 3,616                                                                                                                                                                                                                    | 208 (5.8)                             | 27 (13.0)                            | 82 (39.4)                              | <10 <sup>6</sup>                     | 84 (40.4)                                                                                                 |  |
|                                | 12-<24                 | 3,447                                                                                                                                                                                                                    | 237 (6.9)                             | 36 (15.2)                            | 118 (49.8)                             | <10 <sup>6</sup>                     | 122 (51.5)                                                                                                |  |
|                                | 24+                    | 2,493                                                                                                                                                                                                                    | 405 (16.2)                            | 91 (22.5)                            | 253 (62.5)                             | <10 <sup>6</sup>                     | 253 (62.5)                                                                                                |  |
| 2019/20                        | <1                     | 5,745                                                                                                                                                                                                                    | 293 (5.1)                             | 34 (11.6)                            | 43 (14.7)                              | <10 <sup>6</sup>                     | 43 (14.7)                                                                                                 |  |
|                                | 1-<6                   | 9,697                                                                                                                                                                                                                    | 534 (5.5)                             | 83 (15.5)                            | 172 (32.2)                             | <10 <sup>6</sup>                     | 172 (32.2)                                                                                                |  |
|                                | 6-<12                  | 5,090                                                                                                                                                                                                                    | 327 (6.4)                             | 32 (9.8)                             | 186 (56.9)                             | <10 <sup>6</sup>                     | 186 (56.9)                                                                                                |  |
|                                | 12-<24                 | 3,244                                                                                                                                                                                                                    | 250 (7.7)                             | 35 (14.0)                            | 157 (62.8)                             | <10 <sup>6</sup>                     | 158 (63.2)                                                                                                |  |
|                                | 24+                    | 2,035                                                                                                                                                                                                                    | 348 (17.1)                            | 68 (19.5)                            | 228 (65.5)                             | <10 <sup>6</sup>                     | 228 (65.5)                                                                                                |  |
| <b>Ethnic Group</b>            |                        |                                                                                                                                                                                                                          |                                       |                                      |                                        |                                      |                                                                                                           |  |
| 2017/18                        | White                  | 15,638                                                                                                                                                                                                                   | 1,075 (6.9)                           | 156 (14.5)                           | 487 (45.3)                             | <10 <sup>6</sup>                     | 488 (45.4)                                                                                                |  |
|                                | Mixed                  | 431                                                                                                                                                                                                                      | 22 (5.1)                              | <10 <sup>6</sup>                     | <10 <sup>6</sup>                       | <10 <sup>6</sup>                     | <10 <sup>6</sup>                                                                                          |  |
|                                | Asian or Asian British | 813                                                                                                                                                                                                                      | 35 (4.3)                              | <10 <sup>6</sup>                     | 12 (34.3)                              | <10 <sup>6</sup>                     | 12 (34.3)                                                                                                 |  |
|                                | Black or Black British | 404                                                                                                                                                                                                                      | 20 (5.0)                              | <10 <sup>6</sup>                     | <10 <sup>6</sup>                       | <10 <sup>6</sup>                     | <10 <sup>6</sup>                                                                                          |  |
|                                | Chinese and Other      | 214                                                                                                                                                                                                                      | 16 (7.5)                              | <10 <sup>6</sup>                     | <10 <sup>6</sup>                       | <10 <sup>6</sup>                     | <10 <sup>6</sup>                                                                                          |  |
|                                | Unclassified           | 372                                                                                                                                                                                                                      | 28 (7.5)                              | <10 <sup>6</sup>                     | 18 (64.3)                              | <10 <sup>6</sup>                     | 18 (64.3)                                                                                                 |  |
| 2018/19                        | White                  | 14,911                                                                                                                                                                                                                   | 1,189 (8.0)                           | 189 (15.9)                           | 491 (41.3)                             | <10 <sup>6</sup>                     | 494 (41.5)                                                                                                |  |
|                                | Mixed                  | 371                                                                                                                                                                                                                      | 25 (6.7)                              | 10 (40.0)                            | 10 (40.0)                              | <10 <sup>6</sup>                     | 10 (40.0)                                                                                                 |  |
|                                | Asian or Asian British | 726                                                                                                                                                                                                                      | 42 (5.8)                              | <10 <sup>6</sup>                     | 15 (35.7)                              | <10 <sup>6</sup>                     | 16 (38.1)                                                                                                 |  |
|                                | Black or Black British | 364                                                                                                                                                                                                                      | 22 (6.0)                              | <10 <sup>6</sup>                     | <10 <sup>6</sup>                       | <10 <sup>6</sup>                     | <10 <sup>6</sup>                                                                                          |  |
|                                | Chinese and Other      | 167                                                                                                                                                                                                                      | <10 <sup>6</sup>                      | <10 <sup>6</sup>                     | <10 <sup>6</sup>                       | <10 <sup>6</sup>                     | <10 <sup>6</sup>                                                                                          |  |
|                                | Unclassified           | 409                                                                                                                                                                                                                      | 18 (4.4)                              | <10 <sup>6</sup>                     | <10 <sup>6</sup>                       | <10 <sup>6</sup>                     | <10 <sup>6</sup>                                                                                          |  |
| 2019/20                        | White                  | 16,606                                                                                                                                                                                                                   | 1,272 (7.7)                           | 192 (15.1)                           | 592 (46.5)                             | <10 <sup>6</sup>                     | 593 (46.6)                                                                                                |  |
|                                | Mixed                  | 409                                                                                                                                                                                                                      | 24 (5.9)                              | <10 <sup>6</sup>                     | 19 (79.2)                              | <10 <sup>6</sup>                     | 19 (79.2)                                                                                                 |  |
|                                | Asian or Asian British | 755                                                                                                                                                                                                                      | 69 (9.1)                              | 10 (14.5)                            | 33 (47.8)                              | <10 <sup>6</sup>                     | 33 (47.8)                                                                                                 |  |
|                                | Black or Black British | 451                                                                                                                                                                                                                      | 29 (6.4)                              | <10 <sup>6</sup>                     | <10 <sup>6</sup>                       | <10 <sup>6</sup>                     | <10 <sup>6</sup>                                                                                          |  |
|                                | Chinese and Other      | 163                                                                                                                                                                                                                      | 10 (6.1)                              | <10 <sup>6</sup>                     | <10 <sup>6</sup>                       | <10 <sup>6</sup>                     | <10 <sup>6</sup>                                                                                          |  |
|                                | Unclassified           | 387                                                                                                                                                                                                                      | 21 (5.4)                              | <10 <sup>6</sup>                     | 12 (57.1)                              | <10 <sup>6</sup>                     | 12 (57.1)                                                                                                 |  |

<sup>1</sup>Eligible for indicator; <sup>2</sup>Achieve in current prison; <sup>3</sup>Achieve in previous prison; <sup>4</sup>Overall achievement - either current or previous prison; <sup>5</sup>Declined indicator; <sup>6</sup>Suppressed (<10) to avoid disclosure



no comparable data in QOF 2019/20 data. Foy et al: 12.8% of all adult patients prescribed an opioid at least once; 6.6% of the sample were prescribed stronger opioids, or 0.85% of adults; For patients prescribed any opioids, the proportion prescribed stronger opioids was 13.7%.

| Indicator       | The proportion of prison population prescribed opioids in the preceding 8 weeks from 31st March |                                                                          |                                                                                 |                                                                                              |                             |                                                                             |                                                                  |                                                                                           |               |                  |
|-----------------|-------------------------------------------------------------------------------------------------|--------------------------------------------------------------------------|---------------------------------------------------------------------------------|----------------------------------------------------------------------------------------------|-----------------------------|-----------------------------------------------------------------------------|------------------------------------------------------------------|-------------------------------------------------------------------------------------------|---------------|------------------|
|                 | Group: Prison specific                                                                          |                                                                          |                                                                                 |                                                                                              |                             |                                                                             |                                                                  |                                                                                           |               |                  |
| Variable        | Population                                                                                      | All prison population                                                    |                                                                                 |                                                                                              | Any mental health diagnosis |                                                                             | All prison population AND NO coded diagnosis of neuropathic pain |                                                                                           |               |                  |
|                 |                                                                                                 | Prescribed any opioid in the preceding 8 weeks from 31st March (% popln) | Prescribed any strong opioid in the preceding 8 weeks from 31st March (% popln) | Prescribed benzodiazepines AND any opioid in the preceding 8 weeks from 31st March (% popln) | Eligible (% popln)          | Prescribed any opioid in the preceding 8 weeks from 31st March (% eligible) | Eligible (% popln)                                               | Prescribed pregabalin OR gabapentin in the preceding 8 weeks from 31st March (% eligible) |               |                  |
| Year            | 2017/18                                                                                         | 21,677                                                                   | 1,834 (8.5)                                                                     | 1,834 (8.5)                                                                                  | 1,834 (8.5)                 | 2,466 (11.4)                                                                | 337 (13.7)                                                       | 20,772 (95.8)                                                                             | 218 (1.0)     |                  |
|                 | 2018/19                                                                                         | 22,099                                                                   | 2,496 (11.3)                                                                    | 2,294 (10.4)                                                                                 | 4,882 (22.1)                | 2,398 (10.9)                                                                | 435 (18.1)                                                       | 20,915 (94.6)                                                                             | 190 (0.9)     |                  |
|                 | 2019/20                                                                                         | 25,811                                                                   | 2,957 (11.5)                                                                    | 2,257 (8.7)                                                                                  | 2,257 (8.7)                 | 4,054 (15.7)                                                                | 770 (19.0)                                                       | 24,388 (94.5)                                                                             | 204 (0.8)     |                  |
| Prison          | 2017/18                                                                                         | Prison 1                                                                 | 1,323                                                                           | 98 (7.4)                                                                                     | 98 (7.4)                    | 98 (7.4)                                                                    | 255 (19.3)                                                       | 23 (9.0)                                                                                  | 1,284 (97.1)  | 23 (1.8)         |
|                 |                                                                                                 | Prison 2                                                                 | 3,261                                                                           | 214 (6.6)                                                                                    | 214 (6.6)                   | 214 (6.6)                                                                   | 687 (21.1)                                                       | 92 (13.4)                                                                                 | 3,171 (97.2)  | 29 (0.9)         |
|                 |                                                                                                 | Prison 3                                                                 | 2,623                                                                           | 317 (12.1)                                                                                   | 317 (12.1)                  | 317 (12.1)                                                                  | 207 (7.9)                                                        | 49 (23.7)                                                                                 | 2,564 (97.8)  | <10 <sup>6</sup> |
|                 |                                                                                                 | Prison 4                                                                 | 2,089                                                                           | 329 (15.7)                                                                                   | 329 (15.7)                  | 329 (15.7)                                                                  | 78 (3.7)                                                         | 17 (21.8)                                                                                 | 1,944 (93.1)  | 33 (1.7)         |
|                 |                                                                                                 | Prison 5                                                                 | 637                                                                             | 37 (5.8)                                                                                     | 37 (5.8)                    | 37 (5.8)                                                                    | 55 (8.6)                                                         | <10 <sup>6</sup>                                                                          | 613 (96.2)    | 13 (2.1)         |
|                 |                                                                                                 | Prison 6                                                                 | 1,552                                                                           | <10 <sup>6</sup>                                                                             | <10 <sup>6</sup>            | <10 <sup>6</sup>                                                            | <10 <sup>6</sup>                                                 | <10 <sup>6</sup>                                                                          | 1,552 (100.0) | <10 <sup>6</sup> |
|                 |                                                                                                 | Prison 7                                                                 | 635                                                                             | 104 (16.4)                                                                                   | 104 (16.4)                  | 104 (16.4)                                                                  | 31 (4.9)                                                         | <10 <sup>6</sup>                                                                          | 575 (90.6)    | 14 (2.4)         |
|                 |                                                                                                 | Prison 8                                                                 | 1,085                                                                           | 132 (12.2)                                                                                   | 132 (12.2)                  | 132 (12.2)                                                                  | 543 (50.0)                                                       | 75 (13.8)                                                                                 | 1,006 (92.7)  | 12 (1.2)         |
|                 |                                                                                                 | Prison 9                                                                 | 981                                                                             | 157 (16.0)                                                                                   | 157 (16.0)                  | 157 (16.0)                                                                  | 60 (6.1)                                                         | 17 (28.3)                                                                                 | 869 (88.6)    | 22 (2.5)         |
|                 |                                                                                                 | Prison 10                                                                | 2,523                                                                           | 194 (7.7)                                                                                    | 194 (7.7)                   | 194 (7.7)                                                                   | 304 (12.0)                                                       | 36 (11.8)                                                                                 | 2,473 (98.0)  | 29 (1.2)         |
|                 |                                                                                                 | Prison 11                                                                | 3,470                                                                           | 211 (6.1)                                                                                    | 211 (6.1)                   | 211 (6.1)                                                                   | 97 (2.8)                                                         | 10 (10.3)                                                                                 | 3,319 (95.6)  | 26 (0.8)         |
|                 |                                                                                                 | Prison 12                                                                | 815                                                                             | <10 <sup>6</sup>                                                                             | <10 <sup>6</sup>            | <10 <sup>6</sup>                                                            | <10 <sup>6</sup>                                                 | <10 <sup>6</sup>                                                                          | 815 (100.0)   | <10 <sup>6</sup> |
|                 |                                                                                                 | Prison 13                                                                | 683                                                                             | 41 (6.0)                                                                                     | 41 (6.0)                    | 41 (6.0)                                                                    | 149 (21.8)                                                       | 13 (8.7)                                                                                  | 587 (85.9)    | 17 (2.9)         |
|                 | 2018/19                                                                                         | Prison 1                                                                 | 1,333                                                                           | 111 (8.3)                                                                                    | 126 (9.5)                   | 126 (9.5)                                                                   | 247 (18.5)                                                       | 37 (15.0)                                                                                 | 1,286 (96.5)  | 12 (0.9)         |
|                 |                                                                                                 | Prison 2                                                                 | 2,705                                                                           | 223 (8.2)                                                                                    | 219 (8.1)                   | 219 (8.1)                                                                   | 761 (28.1)                                                       | 126 (16.6)                                                                                | 2,608 (96.4)  | 32 (1.2)         |
|                 |                                                                                                 | Prison 3                                                                 | 2,522                                                                           | 457 (18.1)                                                                                   | 457 (18.1)                  | 457 (18.1)                                                                  | 185 (7.3)                                                        | 77 (41.6)                                                                                 | 2,420 (96.0)  | <10 <sup>6</sup> |
|                 |                                                                                                 | Prison 4                                                                 | 2,349                                                                           | 396 (16.9)                                                                                   | 414 (17.6)                  | 414 (17.6)                                                                  | 132 (5.6)                                                        | 33 (25.0)                                                                                 | 2,143 (91.2)  | 19 (0.9)         |
|                 |                                                                                                 | Prison 5                                                                 | 676                                                                             | 35 (5.2)                                                                                     | 54 (8.0)                    | 54 (8.0)                                                                    | 57 (8.4)                                                         | <10 <sup>6</sup>                                                                          | 649 (96.0)    | <10 <sup>6</sup> |
|                 |                                                                                                 | Prison 6                                                                 | 1,513                                                                           | <10 <sup>6</sup>                                                                             | <10 <sup>6</sup>            | <10 <sup>6</sup>                                                            | <10 <sup>6</sup>                                                 | <10 <sup>6</sup>                                                                          | 1,513 (100.0) | <10 <sup>6</sup> |
|                 |                                                                                                 | Prison 7                                                                 | 654                                                                             | 136 (20.8)                                                                                   | 157 (24.0)                  | 157 (24.0)                                                                  | 60 (9.2)                                                         | 15 (25.0)                                                                                 | 581 (88.8)    | 15 (2.6)         |
|                 |                                                                                                 | Prison 8                                                                 | 1,148                                                                           | 152 (13.2)                                                                                   | 188 (16.4)                  | 188 (16.4)                                                                  | 522 (45.5)                                                       | 86 (16.5)                                                                                 | 1,053 (91.7)  | 14 (1.3)         |
|                 |                                                                                                 | Prison 9                                                                 | 996                                                                             | 152 (15.3)                                                                                   | 185 (18.6)                  | 185 (18.6)                                                                  | 79 (7.9)                                                         | 20 (25.3)                                                                                 | 869 (87.2)    | 19 (2.2)         |
|                 |                                                                                                 | Prison 10                                                                | 2,717                                                                           | 436 (16.0)                                                                                   | 58 (2.1)                    | 2,646 (97.4)                                                                | 26 (1.0)                                                         | <10 <sup>6</sup>                                                                          | 2,646 (97.4)  | 26 (1.0)         |
|                 |                                                                                                 | Prison 11                                                                | 4,020                                                                           | 351 (8.7)                                                                                    | 381 (9.5)                   | 381 (9.5)                                                                   | 167 (4.2)                                                        | 17 (10.2)                                                                                 | 3,788 (94.2)  | 30 (0.8)         |
|                 |                                                                                                 | Prison 12                                                                | 792                                                                             | <10 <sup>6</sup>                                                                             | <10 <sup>6</sup>            | <10 <sup>6</sup>                                                            | <10 <sup>6</sup>                                                 | <10 <sup>6</sup>                                                                          | 792 (100.0)   | <10 <sup>6</sup> |
|                 |                                                                                                 | Prison 13                                                                | 674                                                                             | 47 (7.0)                                                                                     | 55 (8.2)                    | 55 (8.2)                                                                    | 162 (24.0)                                                       | 13 (8.0)                                                                                  | 567 (84.1)    | 17 (3.0)         |
|                 | 2019/20                                                                                         | Prison 1                                                                 | 1,410                                                                           | 128 (9.1)                                                                                    | 103 (7.3)                   | 103 (7.3)                                                                   | 394 (27.9)                                                       | 70 (17.8)                                                                                 | 1,340 (95.0)  | 12 (0.9)         |
|                 |                                                                                                 | Prison 2                                                                 | 2,979                                                                           | 250 (8.4)                                                                                    | 155 (5.2)                   | 155 (5.2)                                                                   | 1,009 (33.9)                                                     | 156 (15.5)                                                                                | 2,845 (95.5)  | 43 (1.5)         |
|                 |                                                                                                 | Prison 3                                                                 | 2,809                                                                           | 527 (18.8)                                                                                   | 437 (15.6)                  | 437 (15.6)                                                                  | 260 (9.3)                                                        | 90 (34.6)                                                                                 | 2,748 (97.8)  | <10 <sup>6</sup> |
|                 |                                                                                                 | Prison 4                                                                 | 2,651                                                                           | 491 (18.5)                                                                                   | 367 (13.8)                  | 367 (13.8)                                                                  | 184 (6.9)                                                        | 59 (32.1)                                                                                 | 2,411 (90.9)  | 14 (0.6)         |
|                 |                                                                                                 | Prison 5                                                                 | 616                                                                             | 48 (7.8)                                                                                     | 42 (6.8)                    | 42 (6.8)                                                                    | 77 (12.5)                                                        | 12 (15.6)                                                                                 | 571 (92.7)    | <10 <sup>6</sup> |
|                 |                                                                                                 | Prison 6                                                                 | 1,533                                                                           | <10 <sup>6</sup>                                                                             | <10 <sup>6</sup>            | <10 <sup>6</sup>                                                            | <10 <sup>6</sup>                                                 | <10 <sup>6</sup>                                                                          | 1,533 (100.0) | <10 <sup>6</sup> |
|                 |                                                                                                 | Prison 7                                                                 | 860                                                                             | 211 (24.5)                                                                                   | 176 (20.5)                  | 176 (20.5)                                                                  | 98 (11.4)                                                        | 22 (22.4)                                                                                 | 747 (86.9)    | 17 (2.3)         |
|                 |                                                                                                 | Prison 8                                                                 | 1,385                                                                           | 222 (16.0)                                                                                   | 137 (9.9)                   | 137 (9.9)                                                                   | 546 (39.4)                                                       | 141 (25.8)                                                                                | 1,290 (93.1)  | 28 (2.2)         |
|                 |                                                                                                 | Prison 9                                                                 | 1,092                                                                           | 175 (16.0)                                                                                   | 182 (16.7)                  | 182 (16.7)                                                                  | 94 (8.6)                                                         | 21 (22.3)                                                                                 | 948 (86.8)    | 23 (2.4)         |
|                 |                                                                                                 | Prison 10                                                                | 3,577                                                                           | 295 (8.2)                                                                                    | 178 (5.0)                   | 178 (5.0)                                                                   | 872 (24.4)                                                       | 137 (15.7)                                                                                | 3,463 (96.8)  | 24 (0.7)         |
|                 |                                                                                                 | Prison 11                                                                | 5,348                                                                           | 569 (10.6)                                                                                   | 420 (7.9)                   | 420 (7.9)                                                                   | 291 (5.4)                                                        | 45 (15.5)                                                                                 | 5,053 (94.5)  | 31 (0.6)         |
|                 |                                                                                                 | Prison 12                                                                | 805                                                                             | <10 <sup>6</sup>                                                                             | <10 <sup>6</sup>            | <10 <sup>6</sup>                                                            | <10 <sup>6</sup>                                                 | <10 <sup>6</sup>                                                                          | 805 (100.0)   | <10 <sup>6</sup> |
|                 |                                                                                                 | Prison 13                                                                | 746                                                                             | 41 (5.5)                                                                                     | 60 (8.0)                    | 60 (8.0)                                                                    | 229 (30.7)                                                       | 17 (7.4)                                                                                  | 634 (85.0)    | <10 <sup>6</sup> |
| Prison category | 2017/18                                                                                         | A                                                                        | 1,664                                                                           | 198 (11.9)                                                                                   | 198 (11.9)                  | 198 (11.9)                                                                  | 209 (12.6)                                                       | 30 (14.4)                                                                                 | 1,456 (87.5)  | 39 (2.7)         |
|                 |                                                                                                 | B                                                                        | 9,254                                                                           | 619 (6.7)                                                                                    | 619 (6.7)                   | 619 (6.7)                                                                   | 1,088 (11.8)                                                     | 138 (12.7)                                                                                | 8,963 (96.9)  | 84 (0.9)         |
|                 |                                                                                                 | C                                                                        | 6,035                                                                           | 744 (12.3)                                                                                   | 744 (12.3)                  | 744 (12.3)                                                                  | 540 (8.9)                                                        | 89 (16.5)                                                                                 | 5,792 (96.0)  | 56 (1.0)         |
|                 |                                                                                                 | Closed                                                                   | 1,720                                                                           | 236 (13.7)                                                                                   | 236 (13.7)                  | 236 (13.7)                                                                  | 574 (33.4)                                                       | 78 (13.6)                                                                                 | 1,581 (91.9)  | 26 (1.6)         |
|                 |                                                                                                 | D                                                                        | 2,189                                                                           | 37 (1.7)                                                                                     | 37 (1.7)                    | 37 (1.7)                                                                    | 55 (2.5)                                                         | <10 <sup>6</sup>                                                                          | 2,165 (98.9)  | 13 (0.6)         |
|                 |                                                                                                 | YOI                                                                      | 815                                                                             | <10 <sup>6</sup>                                                                             | <10 <sup>6</sup>            | <10 <sup>6</sup>                                                            | <10 <sup>6</sup>                                                 | <10 <sup>6</sup>                                                                          | 815 (100.0)   | <10 <sup>6</sup> |
|                 | 2018/19                                                                                         | A                                                                        | 1,670                                                                           | 199 (11.9)                                                                                   | 240 (14.4)                  | 240 (14.4)                                                                  | 241 (14.4)                                                       | 33 (13.7)                                                                                 | 1,436 (86.0)  | 36 (2.5)         |
|                 |                                                                                                 | B                                                                        | 9,442                                                                           | 1,010 (10.7)                                                                                 | 658 (7.0)                   | 3,246 (34.4)                                                                | 954 (10.1)                                                       | 150 (15.7)                                                                                | 9,042 (95.8)  | 88 (1.0)         |
|                 |                                                                                                 | C                                                                        | 6,204                                                                           | 964 (15.5)                                                                                   | 997 (16.1)                  | 997 (16.1)                                                                  | 564 (9.1)                                                        | 147 (26.1)                                                                                | 5,849 (94.3)  | 31 (0.5)         |
|                 |                                                                                                 | Closed                                                                   | 1,802                                                                           | 288 (16.0)                                                                                   | 345 (19.1)                  | 345 (19.1)                                                                  | 582 (32.3)                                                       | 101 (17.4)                                                                                | 1,634 (90.7)  | 29 (1.8)         |
|                 |                                                                                                 | D                                                                        | 2,189                                                                           | 35 (1.6)                                                                                     | 54 (2.5)                    | 54 (2.5)                                                                    | 57 (2.6)                                                         | <10 <sup>6</sup>                                                                          | 2,162 (98.8)  | <10 <sup>6</sup> |
|                 |                                                                                                 | YOI                                                                      | 792                                                                             | <10 <sup>6</sup>                                                                             | <10 <sup>6</sup>            | <10 <sup>6</sup>                                                            | <10 <sup>6</sup>                                                 | <10 <sup>6</sup>                                                                          | 792 (100.0)   | <10 <sup>6</sup> |
|                 | 2019/20                                                                                         | A                                                                        | 1,838                                                                           | 216 (11.8)                                                                                   | 242 (13.2)                  | 242 (13.2)                                                                  | 323 (17.6)                                                       | 38 (11.8)                                                                                 | 1,582 (86.1)  | 27 (1.7)         |
|                 |                                                                                                 | B                                                                        | 11,904                                                                          | 1,114 (9.4)                                                                                  | 753 (6.3)                   | 753 (6.3)                                                                   | 2,172 (18.2)                                                     | 338 (15.6)                                                                                | 11,361 (95.4) | 98 (0.9)         |
|                 |                                                                                                 | C                                                                        | 6,870                                                                           | 1,146 (16.7)                                                                                 | 907 (13.2)                  | 907 (13.2)                                                                  | 838 (12.2)                                                       | 219 (26.1)                                                                                | 6,499 (94.6)  | 26 (0.4)         |
|                 |                                                                                                 | Closed                                                                   | 2,245                                                                           | 433 (19.3)                                                                                   | 313 (13.9)                  | 313 (13.9)                                                                  | 644 (28.7)                                                       | 163 (25.3)                                                                                | 2,037 (90.7)  | 45 (2.2)         |
|                 |                                                                                                 | D                                                                        | 2,149                                                                           | 48 (2.2)                                                                                     | 42 (2.0)                    | 42 (2.0)                                                                    | 77 (3.6)                                                         | 12 (15.6)                                                                                 | 2,104 (97.9)  | <10 <sup>6</sup> |
|                 |                                                                                                 | YOI                                                                      | 805                                                                             | <10 <sup>6</sup>                                                                             | <10 <sup>6</sup>            | <10 <sup>6</sup>                                                            | <10 <sup>6</sup>                                                 | <10 <sup>6</sup>                                                                          | 805 (100.0)   | <10 <sup>6</sup> |
| Gender          | 2017/18                                                                                         | F                                                                        | 1,699                                                                           | 236 (13.9)                                                                                   | 236 (13.9)                  | 236 (13.9)                                                                  | 572 (33.7)                                                       | 78 (13.6)                                                                                 | 1,561 (91.9)  | 26 (1.7)         |
|                 |                                                                                                 | M                                                                        | 19,977                                                                          | 1,598 (8.0)                                                                                  | 1,598 (8.0)                 | 1,598 (8.0)                                                                 | 1,894 (9.5)                                                      | 259 (13.7)                                                                                | 19,210 (96.2) | 192 (1.0)        |
|                 | 2018/19                                                                                         | F                                                                        | 1,802                                                                           | 288 (16.0)                                                                                   | 345 (19.1)                  | 345 (19.1)                                                                  | 581 (32.2)                                                       | 101 (17.4)                                                                                | 1,633 (90.6)  | 29 (1.8)         |
|                 |                                                                                                 | M                                                                        | 20,295                                                                          | 2,208 (10.9)                                                                                 | 1,949 (9.6)                 | 4,535 (22.3)                                                                | 1,817 (9.0)                                                      | 334 (18.4)                                                                                | 19,280 (95.0) | 161 (0.8)        |
|                 | 2019/20                                                                                         | F                                                                        | 1,376                                                                           | 222 (16.1)                                                                                   | 137 (10.0)                  | 137 (10.0)                                                                  | 547 (39.8)                                                       | 141 (25.8)                                                                                | 1,281 (93.1)  | 28 (2.2)         |
|                 |                                                                                                 | M                                                                        | 23,570                                                                          | 2,525 (10.7)                                                                                 | 1,944 (8.2)                 | 1,944 (8.2)                                                                 | 3,410 (14.5)                                                     | 608 (17.8)                                                                                | 22,355 (94.8) | 159 (0.7)        |

<sup>1</sup>Eligible for indicator; <sup>2</sup>Achieve in current prison; <sup>3</sup>Achieve in previous prison; <sup>4</sup>Overall achievement - either current or previous prison; <sup>5</sup>Declined indicator; <sup>6</sup>Suppressed (<10) to avoid disclosure

Indicator

The proportion of prison population prescribed opioids in the preceding 8 weeks from 31st March

Group: Prison specific

no comparable data in QOF 2019/20 data. Foy et al: 12.8% of all adult patients prescribed an opioid at least once; 6.6% of the sample were prescribed stronger opioids, or 0.85% of adults; For patients prescribed any opioids, the proportion prescribed stronger opioids was 13.7%.

| Variable                       | Population       | All prison population                                                    |                                                                                 |                                                                                              | Any mental health diagnosis |                                                                             | All prison population AND NO coded diagnosis of neuropathic pain |                                                                                           |
|--------------------------------|------------------|--------------------------------------------------------------------------|---------------------------------------------------------------------------------|----------------------------------------------------------------------------------------------|-----------------------------|-----------------------------------------------------------------------------|------------------------------------------------------------------|-------------------------------------------------------------------------------------------|
|                                |                  | Prescribed any opioid in the preceding 8 weeks from 31st March (% popln) | Prescribed any strong opioid in the preceding 8 weeks from 31st March (% popln) | Prescribed benzodiazepines AND any opioid in the preceding 8 weeks from 31st March (% popln) | Eligible (% popln)          | Prescribed any opioid in the preceding 8 weeks from 31st March (% eligible) | Eligible (% popln)                                               | Prescribed pregabalin OR gabapentin in the preceding 8 weeks from 31st March (% eligible) |
| <b>Sentence Status</b>         |                  |                                                                          |                                                                                 |                                                                                              |                             |                                                                             |                                                                  |                                                                                           |
| 2017/18                        |                  |                                                                          |                                                                                 |                                                                                              |                             |                                                                             |                                                                  |                                                                                           |
| Absconded                      | 81               | <10 <sup>6</sup>                                                         | <10 <sup>6</sup>                                                                | <10 <sup>6</sup>                                                                             | <10 <sup>6</sup>            | <10 <sup>6</sup>                                                            | 80 (98.8)                                                        | <10 <sup>6</sup>                                                                          |
| Active In                      | <10 <sup>6</sup> | <10 <sup>6</sup>                                                         | <10 <sup>6</sup>                                                                | <10 <sup>6</sup>                                                                             | <10 <sup>6</sup>            | <10 <sup>6</sup>                                                            | <10 <sup>6</sup>                                                 | <10 <sup>6</sup>                                                                          |
| Active Out                     | 15,872           | 1,584 (10.0)                                                             | 1,584 (10.0)                                                                    | 1,584 (10.0)                                                                                 | 1,586 (10.0)                | 244 (15.4)                                                                  | 15,090 (95.1)                                                    | 178 (1.2)                                                                                 |
| Convicted Sentence             | 1,052            | 61 (5.8)                                                                 | 61 (5.8)                                                                        | 61 (5.8)                                                                                     | 134 (12.7)                  | 11 (8.2)                                                                    | 1,026 (97.5)                                                     | 13 (1.3)                                                                                  |
| Downgrade in security category | 2,125            | 91 (4.3)                                                                 | 91 (4.3)                                                                        | 91 (4.3)                                                                                     | 367 (17.3)                  | 35 (9.5)                                                                    | 2,072 (97.5)                                                     | 14 (0.7)                                                                                  |
| Internal Cell Move             | <10 <sup>6</sup> | <10 <sup>6</sup>                                                         | <10 <sup>6</sup>                                                                | <10 <sup>6</sup>                                                                             | <10 <sup>6</sup>            | <10 <sup>6</sup>                                                            | <10 <sup>6</sup>                                                 | <10 <sup>6</sup>                                                                          |
| Judges Remand                  | <10 <sup>6</sup> | <10 <sup>6</sup>                                                         | <10 <sup>6</sup>                                                                | <10 <sup>6</sup>                                                                             | <10 <sup>6</sup>            | <10 <sup>6</sup>                                                            | <10 <sup>6</sup>                                                 | <10 <sup>6</sup>                                                                          |
| Licence Revoke                 | 92               | <10 <sup>6</sup>                                                         | <10 <sup>6</sup>                                                                | <10 <sup>6</sup>                                                                             | 10 (10.9)                   | <10 <sup>6</sup>                                                            | 91 (98.9)                                                        | <10 <sup>6</sup>                                                                          |
| On Remand                      | 52               | <10 <sup>6</sup>                                                         | <10 <sup>6</sup>                                                                | <10 <sup>6</sup>                                                                             | 17 (32.7)                   | <10 <sup>6</sup>                                                            | 51 (98.1)                                                        | <10 <sup>6</sup>                                                                          |
| Transfer                       | 1,492            | 86 (5.8)                                                                 | 86 (5.8)                                                                        | 86 (5.8)                                                                                     | 316 (21.2)                  | 43 (13.6)                                                                   | 1,454 (97.5)                                                     | 12 (0.8)                                                                                  |
| Upgrade in security category   | 910              | <10 <sup>6</sup>                                                         | <10 <sup>6</sup>                                                                | <10 <sup>6</sup>                                                                             | 32 (3.5)                    | <10 <sup>6</sup>                                                            | 907 (99.7)                                                       | <10 <sup>6</sup>                                                                          |
| 2018/19                        |                  |                                                                          |                                                                                 |                                                                                              |                             |                                                                             |                                                                  |                                                                                           |
| Absconded                      | 88               | <10 <sup>6</sup>                                                         | <10 <sup>6</sup>                                                                | <10 <sup>6</sup>                                                                             | <10 <sup>6</sup>            | <10 <sup>6</sup>                                                            | 85 (96.6)                                                        | <10 <sup>6</sup>                                                                          |
| Active In                      | <10 <sup>6</sup> | <10 <sup>6</sup>                                                         | <10 <sup>6</sup>                                                                | <10 <sup>6</sup>                                                                             | <10 <sup>6</sup>            | <10 <sup>6</sup>                                                            | <10 <sup>6</sup>                                                 | <10 <sup>6</sup>                                                                          |
| Active Out                     | 18,145           | 2,214 (12.2)                                                             | 2,052 (11.3)                                                                    | 4,276 (23.6)                                                                                 | 1,635 (9.0)                 | 319 (19.5)                                                                  | 17,095 (94.2)                                                    | 152 (0.9)                                                                                 |
| Convicted Sentence             | 835              | 80 (9.6)                                                                 | 40 (4.8)                                                                        | 376 (45.0)                                                                                   | 72 (8.6)                    | <10 <sup>6</sup>                                                            | 800 (95.8)                                                       | <10 <sup>6</sup>                                                                          |
| Downgrade in security category | 1,320            | 109 (8.3)                                                                | 113 (8.6)                                                                       | 116 (8.8)                                                                                    | 326 (24.7)                  | 59 (18.1)                                                                   | 1,275 (96.6)                                                     | 16 (1.3)                                                                                  |
| Internal Cell Move             | <10 <sup>6</sup> | <10 <sup>6</sup>                                                         | <10 <sup>6</sup>                                                                | <10 <sup>6</sup>                                                                             | <10 <sup>6</sup>            | <10 <sup>6</sup>                                                            | <10 <sup>6</sup>                                                 | <10 <sup>6</sup>                                                                          |
| Judges Remand                  | <10 <sup>6</sup> | <10 <sup>6</sup>                                                         | <10 <sup>6</sup>                                                                | <10 <sup>6</sup>                                                                             | <10 <sup>6</sup>            | <10 <sup>6</sup>                                                            | <10 <sup>6</sup>                                                 | <10 <sup>6</sup>                                                                          |
| Licence Revoke                 | 125              | <10 <sup>6</sup>                                                         | 14 (11.2)                                                                       | 14 (11.2)                                                                                    | 44 (35.2)                   | <10 <sup>6</sup>                                                            | 117 (93.6)                                                       | <10 <sup>6</sup>                                                                          |
| On Remand                      | 1,059            | 77 (7.3)                                                                 | 70 (6.6)                                                                        | 78 (7.4)                                                                                     | 311 (29.4)                  | 45 (14.5)                                                                   | 1,020 (96.3)                                                     | 13 (1.3)                                                                                  |
| Transfer                       | 518              | <10 <sup>6</sup>                                                         | <10 <sup>6</sup>                                                                | <10 <sup>6</sup>                                                                             | <10 <sup>6</sup>            | <10 <sup>6</sup>                                                            | 516 (99.6)                                                       | <10 <sup>6</sup>                                                                          |
| Upgrade in security category   | <10 <sup>6</sup> | <10 <sup>6</sup>                                                         | <10 <sup>6</sup>                                                                | <10 <sup>6</sup>                                                                             | <10 <sup>6</sup>            | <10 <sup>6</sup>                                                            | <10 <sup>6</sup>                                                 | <10 <sup>6</sup>                                                                          |
| 2019/20                        |                  |                                                                          |                                                                                 |                                                                                              |                             |                                                                             |                                                                  |                                                                                           |
| Absconded                      | 69               | <10 <sup>6</sup>                                                         | <10 <sup>6</sup>                                                                | <10 <sup>6</sup>                                                                             | <10 <sup>6</sup>            | <10 <sup>6</sup>                                                            | 68 (98.6)                                                        | <10 <sup>6</sup>                                                                          |
| Active In                      | <10 <sup>6</sup> | <10 <sup>6</sup>                                                         | <10 <sup>6</sup>                                                                | <10 <sup>6</sup>                                                                             | <10 <sup>6</sup>            | <10 <sup>6</sup>                                                            | <10 <sup>6</sup>                                                 | <10 <sup>6</sup>                                                                          |
| Active Out                     | 22,424           | 2,709 (12.1)                                                             | 2,087 (9.3)                                                                     | 2,087 (9.3)                                                                                  | 3,114 (13.9)                | 634 (20.4)                                                                  | 21,137 (94.3)                                                    | 167 (0.8)                                                                                 |
| Convicted Sentence             | 625              | 29 (4.6)                                                                 | 35 (5.6)                                                                        | 35 (5.6)                                                                                     | 97 (15.5)                   | <10 <sup>6</sup>                                                            | 602 (96.3)                                                       | <10 <sup>6</sup>                                                                          |
| Downgrade in security category | 1,361            | 124 (9.1)                                                                | 72 (5.3)                                                                        | 72 (5.3)                                                                                     | 389 (28.6)                  | 70 (18.0)                                                                   | 1,300 (95.5)                                                     | 19 (1.5)                                                                                  |
| Internal Cell Move             | <10 <sup>6</sup> | <10 <sup>6</sup>                                                         | <10 <sup>6</sup>                                                                | <10 <sup>6</sup>                                                                             | <10 <sup>6</sup>            | <10 <sup>6</sup>                                                            | <10 <sup>6</sup>                                                 | <10 <sup>6</sup>                                                                          |
| Judges Remand                  | <10 <sup>6</sup> | <10 <sup>6</sup>                                                         | <10 <sup>6</sup>                                                                | <10 <sup>6</sup>                                                                             | <10 <sup>6</sup>            | <10 <sup>6</sup>                                                            | <10 <sup>6</sup>                                                 | <10 <sup>6</sup>                                                                          |
| Licence Revoke                 | 19               | <10 <sup>6</sup>                                                         | <10 <sup>6</sup>                                                                | <10 <sup>6</sup>                                                                             | <10 <sup>6</sup>            | <10 <sup>6</sup>                                                            | 18 (94.7)                                                        | <10 <sup>6</sup>                                                                          |
| On Remand                      | 178              | 12 (6.7)                                                                 | 18 (10.1)                                                                       | 18 (10.1)                                                                                    | 78 (43.8)                   | <10 <sup>6</sup>                                                            | 166 (93.3)                                                       | <10 <sup>6</sup>                                                                          |
| Transfer                       | 1,031            | 81 (7.9)                                                                 | 41 (4.0)                                                                        | 41 (4.0)                                                                                     | 367 (35.6)                  | 48 (13.1)                                                                   | 994 (96.4)                                                       | 14 (1.4)                                                                                  |
| Upgrade in security category   | 101              | <10 <sup>6</sup>                                                         | <10 <sup>6</sup>                                                                | <10 <sup>6</sup>                                                                             | <10 <sup>6</sup>            | <10 <sup>6</sup>                                                            | 100 (99.0)                                                       | <10 <sup>6</sup>                                                                          |
| <b>Age - years</b>             |                  |                                                                          |                                                                                 |                                                                                              |                             |                                                                             |                                                                  |                                                                                           |
| 2017/18                        |                  |                                                                          |                                                                                 |                                                                                              |                             |                                                                             |                                                                  |                                                                                           |
| 10 - <20                       | 468              | <10 <sup>6</sup>                                                         | <10 <sup>6</sup>                                                                | <10 <sup>6</sup>                                                                             | <10 <sup>6</sup>            | <10 <sup>6</sup>                                                            | 467 (99.8)                                                       | <10 <sup>6</sup>                                                                          |
| 20 - <30                       | 6,994            | 246 (3.5)                                                                | 246 (3.5)                                                                       | 246 (3.5)                                                                                    | 538 (7.7)                   | 28 (5.2)                                                                    | 6,908 (98.8)                                                     | 16 (0.2)                                                                                  |
| 30 - <40                       | 7,051            | 700 (9.9)                                                                | 700 (9.9)                                                                       | 700 (9.9)                                                                                    | 846 (12.0)                  | 115 (13.6)                                                                  | 6,804 (96.5)                                                     | 75 (1.1)                                                                                  |
| 40 - <50                       | 4,114            | 540 (13.1)                                                               | 540 (13.1)                                                                      | 540 (13.1)                                                                                   | 667 (16.2)                  | 123 (18.4)                                                                  | 3,844 (93.4)                                                     | 74 (1.9)                                                                                  |
| 50 - <60                       | 2,107            | 229 (10.9)                                                               | 229 (10.9)                                                                      | 229 (10.9)                                                                                   | 297 (14.1)                  | 52 (17.5)                                                                   | 1,918 (91.0)                                                     | 42 (2.2)                                                                                  |
| 60 - <70                       | 684              | 75 (11.0)                                                                | 75 (11.0)                                                                       | 75 (11.0)                                                                                    | 86 (12.6)                   | 13 (15.1)                                                                   | 598 (87.4)                                                       | <10 <sup>6</sup>                                                                          |
| 70 - <80                       | 213              | 35 (16.4)                                                                | 35 (16.4)                                                                       | 35 (16.4)                                                                                    | 20 (9.4)                    | <10 <sup>6</sup>                                                            | 189 (88.7)                                                       | <10 <sup>6</sup>                                                                          |
| 80 - <90                       | 40               | <10 <sup>6</sup>                                                         | <10 <sup>6</sup>                                                                | <10 <sup>6</sup>                                                                             | <10 <sup>6</sup>            | <10 <sup>6</sup>                                                            | 38 (95.0)                                                        | <10 <sup>6</sup>                                                                          |
| 90 - <100                      | <10 <sup>6</sup> | <10 <sup>6</sup>                                                         | <10 <sup>6</sup>                                                                | <10 <sup>6</sup>                                                                             | <10 <sup>6</sup>            | <10 <sup>6</sup>                                                            | <10 <sup>6</sup>                                                 | <10 <sup>6</sup>                                                                          |
| 100 - <110                     | <10 <sup>6</sup> | <10 <sup>6</sup>                                                         | <10 <sup>6</sup>                                                                | <10 <sup>6</sup>                                                                             | <10 <sup>6</sup>            | <10 <sup>6</sup>                                                            | <10 <sup>6</sup>                                                 | <10 <sup>6</sup>                                                                          |
| 2018/19                        |                  |                                                                          |                                                                                 |                                                                                              |                             |                                                                             |                                                                  |                                                                                           |
| 10 - <20                       | 436              | <10 <sup>6</sup>                                                         | <10 <sup>6</sup>                                                                | 72 (16.5)                                                                                    | <10 <sup>6</sup>            | <10 <sup>6</sup>                                                            | 436 (100.0)                                                      | <10 <sup>6</sup>                                                                          |
| 20 - <30                       | 7,163            | 419 (5.8)                                                                | 299 (4.2)                                                                       | 1,225 (17.1)                                                                                 | 528 (7.4)                   | 46 (8.7)                                                                    | 7,039 (98.3)                                                     | 24 (0.3)                                                                                  |
| 30 - <40                       | 7,381            | 985 (13.3)                                                               | 872 (11.8)                                                                      | 1,735 (23.5)                                                                                 | 864 (11.7)                  | 165 (19.1)                                                                  | 7,015 (95.0)                                                     | 66 (0.9)                                                                                  |
| 40 - <50                       | 4,180            | 680 (16.3)                                                               | 682 (16.3)                                                                      | 1,110 (26.6)                                                                                 | 624 (14.9)                  | 138 (22.1)                                                                  | 3,812 (91.2)                                                     | 46 (1.2)                                                                                  |
| 50 - <60                       | 1,978            | 283 (14.3)                                                               | 303 (15.3)                                                                      | 508 (25.7)                                                                                   | 270 (13.7)                  | 72 (26.7)                                                                   | 1,772 (89.6)                                                     | 40 (2.3)                                                                                  |
| 60 - <70                       | 701              | 87 (12.4)                                                                | 94 (13.4)                                                                       | 165 (23.5)                                                                                   | 81 (11.6)                   | 10 (12.3)                                                                   | 609 (86.9)                                                       | 12 (2.0)                                                                                  |
| 70 - <80                       | 209              | 28 (13.4)                                                                | 35 (16.7)                                                                       | 52 (24.9)                                                                                    | 21 (10.0)                   | <10 <sup>6</sup>                                                            | 186 (89.0)                                                       | <10 <sup>6</sup>                                                                          |
| 80 - <90                       | 45               | <10 <sup>6</sup>                                                         | <10 <sup>6</sup>                                                                | 15 (33.3)                                                                                    | <10 <sup>6</sup>            | <10 <sup>6</sup>                                                            | 40 (88.9)                                                        | <10 <sup>6</sup>                                                                          |
| 90 - <100                      | <10 <sup>6</sup> | <10 <sup>6</sup>                                                         | <10 <sup>6</sup>                                                                | <10 <sup>6</sup>                                                                             | <10 <sup>6</sup>            | <10 <sup>6</sup>                                                            | <10 <sup>6</sup>                                                 | <10 <sup>6</sup>                                                                          |
| 100 - <110                     | <10 <sup>6</sup> | <10 <sup>6</sup>                                                         | <10 <sup>6</sup>                                                                | <10 <sup>6</sup>                                                                             | <10 <sup>6</sup>            | <10 <sup>6</sup>                                                            | <10 <sup>6</sup>                                                 | <10 <sup>6</sup>                                                                          |
| 2019/20                        |                  |                                                                          |                                                                                 |                                                                                              |                             |                                                                             |                                                                  |                                                                                           |
| 10 - <20                       | 404              | <10 <sup>6</sup>                                                         | <10 <sup>6</sup>                                                                | <10 <sup>6</sup>                                                                             | 14 (3.5)                    | <10 <sup>6</sup>                                                            | 404 (100.0)                                                      | <10 <sup>6</sup>                                                                          |
| 20 - <30                       | 8,064            | 445 (5.5)                                                                | 273 (3.4)                                                                       | 273 (3.4)                                                                                    | 941 (11.7)                  | 94 (10.0)                                                                   | 7,919 (98.2)                                                     | <10 <sup>6</sup>                                                                          |
| 30 - <40                       | 9,125            | 1,216 (13.3)                                                             | 933 (10.2)                                                                      | 933 (10.2)                                                                                   | 1,600 (17.5)                | 301 (18.8)                                                                  | 8,635 (94.6)                                                     | 73 (0.8)                                                                                  |
| 40 - <50                       | 4,948            | 905 (18.3)                                                               | 648 (13.1)                                                                      | 648 (13.1)                                                                                   | 994 (20.1)                  | 263 (26.5)                                                                  | 4,525 (91.5)                                                     | 82 (1.8)                                                                                  |
| 50 - <60                       | 2,224            | 271 (12.2)                                                               | 278 (12.5)                                                                      | 278 (12.5)                                                                                   | 371 (16.7)                  | 92 (24.8)                                                                   | 1,987 (89.3)                                                     | 24 (1.2)                                                                                  |
| 60 - <70                       | 751              | 79 (10.5)                                                                | 85 (11.3)                                                                       | 85 (11.3)                                                                                    | 108 (14.4)                  | 17 (15.7)                                                                   | 658 (87.6)                                                       | 13 (2.0)                                                                                  |
| 70 - <80                       | 238              | 31 (13.0)                                                                | 33 (13.9)                                                                       | 33 (13.9)                                                                                    | 23 (9.7)                    | <10 <sup>6</sup>                                                            | 209 (87.8)                                                       | <10 <sup>6</sup>                                                                          |
| 80 - <90                       | 53               | <10 <sup>6</sup>                                                         | <10 <sup>6</sup>                                                                | <10 <sup>6</sup>                                                                             | <10 <sup>6</sup>            | <10 <sup>6</sup>                                                            | 47 (88.7)                                                        | <10 <sup>6</sup>                                                                          |
| 90 - <100                      | <10 <sup>6</sup> | <10 <sup>6</sup>                                                         | <10 <sup>6</sup>                                                                | <10 <sup>6</sup>                                                                             | <10 <sup>6</sup>            | <10 <sup>6</sup>                                                            | <10 <sup>6</sup>                                                 | <10 <sup>6</sup>                                                                          |
| 100 - <110                     | <10 <sup>6</sup> | <10 <sup>6</sup>                                                         | <10 <sup>6</sup>                                                                | <10 <sup>6</sup>                                                                             | <10 <sup>6</sup>            | <10 <sup>6</sup>                                                            | <10 <sup>6</sup>                                                 | <10 <sup>6</sup>                                                                          |

<sup>1</sup>Eligible for indicator; <sup>2</sup>Achieve in current prison; <sup>3</sup>Achieve in previous prison; <sup>4</sup>Overall achievement - either current or previous prison; <sup>5</sup>Declined indicator; <sup>6</sup>Suppressed (<10) to avoid disclosure

| Indicator                                                                                                                                                                                                                                                                                     |                        | The proportion of prison population prescribed opioids in the preceding 8 weeks from 31st March |                                                                                 |                                                                                              |                             |                                                                             |                                                                  |                                                                                           |                  |
|-----------------------------------------------------------------------------------------------------------------------------------------------------------------------------------------------------------------------------------------------------------------------------------------------|------------------------|-------------------------------------------------------------------------------------------------|---------------------------------------------------------------------------------|----------------------------------------------------------------------------------------------|-----------------------------|-----------------------------------------------------------------------------|------------------------------------------------------------------|-------------------------------------------------------------------------------------------|------------------|
| Group: Prison specific                                                                                                                                                                                                                                                                        |                        | All prison population                                                                           |                                                                                 |                                                                                              | Any mental health diagnosis |                                                                             | All prison population AND NO coded diagnosis of neuropathic pain |                                                                                           |                  |
| Variable                                                                                                                                                                                                                                                                                      | Population             | Prescribed any opioid in the preceding 8 weeks from 31st March (% popln)                        | Prescribed any strong opioid in the preceding 8 weeks from 31st March (% popln) | Prescribed benzodiazepines AND any opioid in the preceding 8 weeks from 31st March (% popln) | Eligible (% popln)          | Prescribed any opioid in the preceding 8 weeks from 31st March (% eligible) | Eligible (% popln)                                               | Prescribed pregabalin OR gabapentin in the preceding 8 weeks from 31st March (% eligible) |                  |
| <i>no comparable data in QOF 2019/20 data. Foy et al: 12.8% of all adult patients prescribed an opioid at least once; 6.6% of the sample were prescribed stronger opioids, or 0.85% of adults; For patients prescribed any opioids, the proportion prescribed stronger opioids was 13.7%.</i> |                        |                                                                                                 |                                                                                 |                                                                                              |                             |                                                                             |                                                                  |                                                                                           |                  |
| <b>Length of Stay (months)</b>                                                                                                                                                                                                                                                                |                        |                                                                                                 |                                                                                 |                                                                                              |                             |                                                                             |                                                                  |                                                                                           |                  |
| 2017/18                                                                                                                                                                                                                                                                                       | <1                     | 4,474                                                                                           | 190 (4.2)                                                                       | 190 (4.2)                                                                                    | 190 (4.2)                   | 416 (9.3)                                                                   | 33 (7.9)                                                         | 4,369 (97.7)                                                                              | 22 (0.5)         |
|                                                                                                                                                                                                                                                                                               | 1-<6                   | 8,075                                                                                           | 527 (6.5)                                                                       | 527 (6.5)                                                                                    | 527 (6.5)                   | 930 (11.5)                                                                  | 98 (10.5)                                                        | 7,839 (97.1)                                                                              | 62 (0.8)         |
|                                                                                                                                                                                                                                                                                               | 6-<12                  | 3,672                                                                                           | 361 (9.8)                                                                       | 361 (9.8)                                                                                    | 361 (9.8)                   | 463 (12.6)                                                                  | 76 (16.4)                                                        | 3,548 (96.6)                                                                              | 45 (1.3)         |
|                                                                                                                                                                                                                                                                                               | 12-<24                 | 2,832                                                                                           | 316 (11.2)                                                                      | 316 (11.2)                                                                                   | 316 (11.2)                  | 301 (10.6)                                                                  | 58 (19.3)                                                        | 2,710 (95.7)                                                                              | 33 (1.2)         |
|                                                                                                                                                                                                                                                                                               | 24+                    | 2,624                                                                                           | 440 (16.8)                                                                      | 440 (16.8)                                                                                   | 440 (16.8)                  | 356 (13.6)                                                                  | 72 (20.2)                                                        | 2,306 (87.9)                                                                              | 56 (2.4)         |
| 2018/19                                                                                                                                                                                                                                                                                       | <1                     | 4,801                                                                                           | 312 (6.5)                                                                       | 299 (6.2)                                                                                    | 1,189 (24.8)                | 400 (8.3)                                                                   | 45 (11.3)                                                        | 4,632 (96.5)                                                                              | 19 (0.4)         |
|                                                                                                                                                                                                                                                                                               | 1-<6                   | 7,742                                                                                           | 837 (10.8)                                                                      | 656 (8.5)                                                                                    | 1,935 (25.0)                | 838 (10.8)                                                                  | 129 (15.4)                                                       | 7,447 (96.2)                                                                              | 53 (0.7)         |
|                                                                                                                                                                                                                                                                                               | 6-<12                  | 3,616                                                                                           | 426 (11.8)                                                                      | 401 (11.1)                                                                                   | 730 (20.2)                  | 403 (11.1)                                                                  | 74 (18.4)                                                        | 3,441 (95.2)                                                                              | 40 (1.2)         |
|                                                                                                                                                                                                                                                                                               | 12-<24                 | 3,447                                                                                           | 501 (14.5)                                                                      | 472 (13.7)                                                                                   | 557 (16.2)                  | 379 (11.0)                                                                  | 107 (28.2)                                                       | 3,241 (94.0)                                                                              | 42 (1.3)         |
|                                                                                                                                                                                                                                                                                               | 24+                    | 2,493                                                                                           | 420 (16.8)                                                                      | 466 (18.7)                                                                                   | 471 (18.9)                  | 378 (15.2)                                                                  | 80 (21.2)                                                        | 2,154 (86.4)                                                                              | 36 (1.7)         |
| 2019/20                                                                                                                                                                                                                                                                                       | <1                     | 5,745                                                                                           | 359 (6.2)                                                                       | 345 (6.0)                                                                                    | 345 (6.0)                   | 742 (12.9)                                                                  | 85 (11.5)                                                        | 5,520 (96.1)                                                                              | 26 (0.5)         |
|                                                                                                                                                                                                                                                                                               | 1-<6                   | 9,697                                                                                           | 1,033 (10.7)                                                                    | 672 (6.9)                                                                                    | 672 (6.9)                   | 1,621 (16.7)                                                                | 272 (16.8)                                                       | 9,304 (95.9)                                                                              | 79 (0.8)         |
|                                                                                                                                                                                                                                                                                               | 6-<12                  | 5,090                                                                                           | 792 (15.6)                                                                      | 451 (8.9)                                                                                    | 451 (8.9)                   | 863 (17.0)                                                                  | 221 (25.6)                                                       | 4,803 (94.4)                                                                              | 47 (1.0)         |
|                                                                                                                                                                                                                                                                                               | 12-<24                 | 3,244                                                                                           | 455 (14.0)                                                                      | 399 (12.3)                                                                                   | 399 (12.3)                  | 474 (14.6)                                                                  | 118 (24.9)                                                       | 3,024 (93.2)                                                                              | 32 (1.1)         |
|                                                                                                                                                                                                                                                                                               | 24+                    | 2,035                                                                                           | 318 (15.6)                                                                      | 390 (19.2)                                                                                   | 390 (19.2)                  | 354 (17.4)                                                                  | 74 (20.9)                                                        | 1,737 (85.4)                                                                              | 20 (1.2)         |
| <b>Ethnic Group</b>                                                                                                                                                                                                                                                                           |                        |                                                                                                 |                                                                                 |                                                                                              |                             |                                                                             |                                                                  |                                                                                           |                  |
| 2017/18                                                                                                                                                                                                                                                                                       | White                  | 15,638                                                                                          | 1,558 (10.0)                                                                    | 1,558 (10.0)                                                                                 | 1,558 (10.0)                | 2,120 (13.6)                                                                | 303 (14.3)                                                       | 14,854 (95.0)                                                                             | 184 (1.2)        |
|                                                                                                                                                                                                                                                                                               | Mixed                  | 431                                                                                             | 19 (4.4)                                                                        | 19 (4.4)                                                                                     | 19 (4.4)                    | 44 (10.2)                                                                   | <10 <sup>6</sup>                                                 | 415 (96.3)                                                                                | <10 <sup>6</sup> |
|                                                                                                                                                                                                                                                                                               | Asian or Asian British | 813                                                                                             | 19 (2.3)                                                                        | 19 (2.3)                                                                                     | 19 (2.3)                    | 47 (5.8)                                                                    | <10 <sup>6</sup>                                                 | 803 (98.8)                                                                                | <10 <sup>6</sup> |
|                                                                                                                                                                                                                                                                                               | Black or Black British | 404                                                                                             | 13 (3.2)                                                                        | 13 (3.2)                                                                                     | 13 (3.2)                    | 41 (10.1)                                                                   | <10 <sup>6</sup>                                                 | 390 (96.5)                                                                                | <10 <sup>6</sup> |
|                                                                                                                                                                                                                                                                                               | Chinese and Other      | 214                                                                                             | <10 <sup>6</sup>                                                                | <10 <sup>6</sup>                                                                             | <10 <sup>6</sup>            | 26 (12.1)                                                                   | <10 <sup>6</sup>                                                 | 210 (98.1)                                                                                | <10 <sup>6</sup> |
|                                                                                                                                                                                                                                                                                               | Unclassified           | 372                                                                                             | 17 (4.6)                                                                        | 17 (4.6)                                                                                     | 17 (4.6)                    | 36 (9.7)                                                                    | <10 <sup>6</sup>                                                 | 347 (93.3)                                                                                | <10 <sup>6</sup> |
| 2018/19                                                                                                                                                                                                                                                                                       | White                  | 14,911                                                                                          | 2,062 (13.8)                                                                    | 2,010 (13.5)                                                                                 | 3,779 (25.3)                | 2,043 (13.7)                                                                | 395 (19.3)                                                       | 13,898 (93.2)                                                                             | 148 (1.1)        |
|                                                                                                                                                                                                                                                                                               | Mixed                  | 371                                                                                             | 31 (8.4)                                                                        | 21 (5.7)                                                                                     | 60 (16.2)                   | 41 (11.1)                                                                   | <10 <sup>6</sup>                                                 | 350 (94.3)                                                                                | <10 <sup>6</sup> |
|                                                                                                                                                                                                                                                                                               | Asian or Asian British | 726                                                                                             | 30 (4.1)                                                                        | 26 (3.6)                                                                                     | 163 (22.5)                  | 48 (6.6)                                                                    | <10 <sup>6</sup>                                                 | 708 (97.5)                                                                                | <10 <sup>6</sup> |
|                                                                                                                                                                                                                                                                                               | Black or Black British | 364                                                                                             | 19 (5.2)                                                                        | 11 (3.0)                                                                                     | 45 (12.4)                   | 31 (8.5)                                                                    | <10 <sup>6</sup>                                                 | 347 (95.3)                                                                                | <10 <sup>6</sup> |
|                                                                                                                                                                                                                                                                                               | Chinese and Other      | 167                                                                                             | 10 (6.0)                                                                        | <10 <sup>6</sup>                                                                             | 31 (18.6)                   | 21 (12.6)                                                                   | <10 <sup>6</sup>                                                 | 161 (96.4)                                                                                | <10 <sup>6</sup> |
|                                                                                                                                                                                                                                                                                               | Unclassified           | 409                                                                                             | 33 (8.1)                                                                        | 18 (4.4)                                                                                     | 49 (12.0)                   | 25 (6.1)                                                                    | <10 <sup>6</sup>                                                 | 384 (93.9)                                                                                | <10 <sup>6</sup> |
| 2019/20                                                                                                                                                                                                                                                                                       | White                  | 16,606                                                                                          | 2,442 (14.7)                                                                    | 2,042 (12.3)                                                                                 | 2,042 (12.3)                | 3,395 (20.4)                                                                | 694 (20.4)                                                       | 15,401 (92.7)                                                                             | 173 (1.1)        |
|                                                                                                                                                                                                                                                                                               | Mixed                  | 409                                                                                             | 20 (4.9)                                                                        | 22 (5.4)                                                                                     | 22 (5.4)                    | 67 (16.4)                                                                   | <10 <sup>6</sup>                                                 | 377 (92.2)                                                                                | <10 <sup>6</sup> |
|                                                                                                                                                                                                                                                                                               | Asian or Asian British | 755                                                                                             | 29 (3.8)                                                                        | 28 (3.7)                                                                                     | 28 (3.7)                    | 91 (12.1)                                                                   | <10 <sup>6</sup>                                                 | 733 (97.1)                                                                                | <10 <sup>6</sup> |
|                                                                                                                                                                                                                                                                                               | Black or Black British | 451                                                                                             | 25 (5.5)                                                                        | 24 (5.3)                                                                                     | 24 (5.3)                    | 58 (12.9)                                                                   | <10 <sup>6</sup>                                                 | 432 (95.8)                                                                                | <10 <sup>6</sup> |
|                                                                                                                                                                                                                                                                                               | Chinese and Other      | 163                                                                                             | <10 <sup>6</sup>                                                                | <10 <sup>6</sup>                                                                             | <10 <sup>6</sup>            | 21 (12.9)                                                                   | <10 <sup>6</sup>                                                 | 157 (96.3)                                                                                | <10 <sup>6</sup> |
|                                                                                                                                                                                                                                                                                               | Unclassified           | 387                                                                                             | 32 (8.3)                                                                        | 26 (6.7)                                                                                     | 26 (6.7)                    | 49 (12.7)                                                                   | <10 <sup>6</sup>                                                 | 364 (94.1)                                                                                | <10 <sup>6</sup> |

<sup>1</sup>Eligible for indicator; <sup>2</sup>Achieve in current prison; <sup>3</sup>Achieve in previous prison; <sup>4</sup>Overall achievement - either current or previous prison; <sup>5</sup>Declined indicator; <sup>6</sup>Suppressed (<10) to avoid disclosure

| Indicator              | The proportion of new receptions to prison who have been asked for consent to transfer medical records from GP to prison healthcare |            |                                 |                                   |                                     |                                   | Community achievement<br>2019/20 (%): NA |
|------------------------|-------------------------------------------------------------------------------------------------------------------------------------|------------|---------------------------------|-----------------------------------|-------------------------------------|-----------------------------------|------------------------------------------|
|                        | Group: Prison specific                                                                                                              |            |                                 |                                   |                                     |                                   |                                          |
|                        | Variable                                                                                                                            | Population | Eligible <sup>1</sup> (% popln) | Satisfy <sup>2</sup> (% eligible) | Elsewhere <sup>3</sup> (% eligible) | Achieve <sup>4</sup> (% eligible) |                                          |
| <b>Year</b>            |                                                                                                                                     |            |                                 |                                   |                                     |                                   |                                          |
|                        | 2017/18                                                                                                                             | 21,677     | 14,248 (65.7)                   | 7,118 (50.0)                      | 526 (3.7)                           | 7,644 (53.6)                      |                                          |
|                        | 2018/19                                                                                                                             | 22,099     | 14,907 (67.5)                   | 10,661 (71.5)                     | 477 (3.2)                           | 11,138 (74.7)                     |                                          |
|                        | 2019/20                                                                                                                             | 25,811     | 17,957 (69.6)                   | 11,519 (64.1)                     | 1,120 (6.2)                         | 12,639 (70.4)                     |                                          |
| <b>Prison</b>          |                                                                                                                                     |            |                                 |                                   |                                     |                                   |                                          |
| 2017/18                | Prison 1                                                                                                                            | 1,323      | 818 (61.8)                      | 41 (5.0)                          | 99 (12.1)                           | 140 (17.1)                        |                                          |
|                        | Prison 2                                                                                                                            | 3,261      | 2,502 (76.7)                    | 20 (0.8)                          | 60 (2.4)                            | 80 (3.2)                          |                                          |
|                        | Prison 3                                                                                                                            | 2,623      | 1,834 (69.9)                    | 1,702 (92.8)                      | 23 (1.3)                            | 1,725 (94.1)                      |                                          |
|                        | Prison 4                                                                                                                            | 2,089      | 1,091 (52.2)                    | 1,014 (92.9)                      | 20 (1.8)                            | 1,034 (94.8)                      |                                          |
|                        | Prison 5                                                                                                                            | 637        | 366 (57.5)                      | <10 <sup>6</sup>                  | 114 (31.1)                          | 117 (32.0)                        |                                          |
|                        | Prison 6                                                                                                                            | 1,552      | 555 (35.8)                      | 173 (31.2)                        | 72 (13.0)                           | 245 (44.1)                        |                                          |
|                        | Prison 7                                                                                                                            | 635        | 426 (67.1)                      | 378 (88.7)                        | <10 <sup>6</sup>                    | 380 (89.2)                        |                                          |
|                        | Prison 8                                                                                                                            | 1,085      | 802 (73.9)                      | 683 (85.2)                        | <10 <sup>6</sup>                    | 683 (85.2)                        |                                          |
|                        | Prison 9                                                                                                                            | 981        | 240 (24.5)                      | 168 (70.0)                        | 25 (10.4)                           | 193 (80.4)                        |                                          |
|                        | Prison 10                                                                                                                           | 2,523      | 2,030 (80.5)                    | 130 (6.4)                         | 59 (2.9)                            | 189 (9.3)                         |                                          |
|                        | Prison 11                                                                                                                           | 3,470      | 2,978 (85.8)                    | 2,367 (79.5)                      | 30 (1.0)                            | 2,397 (80.5)                      |                                          |
|                        | Prison 12                                                                                                                           | 815        | 440 (54.0)                      | 401 (91.1)                        | <10 <sup>6</sup>                    | 407 (92.5)                        |                                          |
|                        | Prison 13                                                                                                                           | 683        | 166 (24.3)                      | 38 (22.9)                         | 16 (9.6)                            | 54 (32.5)                         |                                          |
| 2018/19                | Prison 1                                                                                                                            | 1,333      | 856 (64.2)                      | 125 (14.6)                        | 176 (20.6)                          | 301 (35.2)                        |                                          |
|                        | Prison 2                                                                                                                            | 2,705      | 2,076 (76.7)                    | 22 (1.1)                          | 103 (5.0)                           | 125 (6.0)                         |                                          |
|                        | Prison 3                                                                                                                            | 2,522      | 1,635 (64.8)                    | 1,558 (95.3)                      | <10 <sup>6</sup>                    | 1,567 (95.8)                      |                                          |
|                        | Prison 4                                                                                                                            | 2,349      | 1,320 (56.2)                    | 1,174 (88.9)                      | 55 (4.2)                            | 1,229 (93.1)                      |                                          |
|                        | Prison 5                                                                                                                            | 676        | 419 (62.0)                      | 346 (82.6)                        | 11 (2.6)                            | 357 (85.2)                        |                                          |
|                        | Prison 6                                                                                                                            | 1,513      | 741 (49.0)                      | 659 (88.9)                        | 12 (1.6)                            | 671 (90.6)                        |                                          |
|                        | Prison 7                                                                                                                            | 654        | 431 (65.9)                      | 414 (96.1)                        | <10 <sup>6</sup>                    | 415 (96.3)                        |                                          |
|                        | Prison 8                                                                                                                            | 1,148      | 844 (73.5)                      | 771 (91.4)                        | <10 <sup>6</sup>                    | 771 (91.4)                        |                                          |
|                        | Prison 9                                                                                                                            | 996        | 248 (24.9)                      | 170 (68.5)                        | 49 (19.8)                           | 219 (88.3)                        |                                          |
|                        | Prison 10                                                                                                                           | 2,717      | 2,265 (83.4)                    | 1,923 (84.9)                      | <10 <sup>6</sup>                    | 1,928 (85.1)                      |                                          |
|                        | Prison 11                                                                                                                           | 4,020      | 3,441 (85.6)                    | 2,938 (85.4)                      | 41 (1.2)                            | 2,979 (86.6)                      |                                          |
|                        | Prison 12                                                                                                                           | 792        | 447 (56.4)                      | 418 (93.5)                        | <10 <sup>6</sup>                    | 424 (94.9)                        |                                          |
|                        | Prison 13                                                                                                                           | 674        | 184 (27.3)                      | 143 (77.7)                        | <10 <sup>6</sup>                    | 152 (82.6)                        |                                          |
| 2019/20                | Prison 1                                                                                                                            | 1,410      | 927 (65.7)                      | 349 (37.6)                        | 267 (28.8)                          | 616 (66.5)                        |                                          |
|                        | Prison 2                                                                                                                            | 2,979      | 2,419 (81.2)                    | 49 (2.0)                          | 174 (7.2)                           | 223 (9.2)                         |                                          |
|                        | Prison 3                                                                                                                            | 2,809      | 1,780 (63.4)                    | 1,430 (80.3)                      | 141 (7.9)                           | 1,571 (88.3)                      |                                          |
|                        | Prison 4                                                                                                                            | 2,651      | 1,522 (57.4)                    | 1,061 (69.7)                      | 220 (14.5)                          | 1,281 (84.2)                      |                                          |
|                        | Prison 5                                                                                                                            | 616        | 354 (57.5)                      | 262 (74.0)                        | 30 (8.5)                            | 292 (82.5)                        |                                          |
|                        | Prison 6                                                                                                                            | 1,533      | 904 (59.0)                      | 837 (92.6)                        | 18 (2.0)                            | 855 (94.6)                        |                                          |
|                        | Prison 7                                                                                                                            | 860        | 603 (70.1)                      | 481 (79.8)                        | 17 (2.8)                            | 498 (82.6)                        |                                          |
|                        | Prison 8                                                                                                                            | 1,385      | 1,048 (75.7)                    | 952 (90.8)                        | <10 <sup>6</sup>                    | 952 (90.8)                        |                                          |
|                        | Prison 9                                                                                                                            | 1,092      | 276 (25.3)                      | 142 (51.4)                        | 62 (22.5)                           | 204 (73.9)                        |                                          |
|                        | Prison 10                                                                                                                           | 3,577      | 2,760 (77.2)                    | 2,013 (72.9)                      | 37 (1.3)                            | 2,050 (74.3)                      |                                          |
|                        | Prison 11                                                                                                                           | 5,348      | 4,676 (87.4)                    | 3,437 (73.5)                      | 84 (1.8)                            | 3,521 (75.3)                      |                                          |
|                        | Prison 12                                                                                                                           | 805        | 441 (54.8)                      | 333 (75.5)                        | 50 (11.3)                           | 383 (86.8)                        |                                          |
|                        | Prison 13                                                                                                                           | 746        | 247 (33.1)                      | 173 (70.0)                        | 20 (8.1)                            | 193 (78.1)                        |                                          |
| <b>Prison category</b> |                                                                                                                                     |            |                                 |                                   |                                     |                                   |                                          |
| 2017/18                | A                                                                                                                                   | 1,664      | 406 (24.4)                      | 206 (50.7)                        | 41 (10.1)                           | 247 (60.8)                        |                                          |
|                        | B                                                                                                                                   | 9,254      | 7,510 (81.2)                    | 2,517 (33.5)                      | 149 (2.0)                           | 2,666 (35.5)                      |                                          |
|                        | C                                                                                                                                   | 6,035      | 3,743 (62.0)                    | 2,757 (73.7)                      | 142 (3.8)                           | 2,899 (77.5)                      |                                          |
|                        | Closed                                                                                                                              | 1,720      | 1,228 (71.4)                    | 1,061 (86.4)                      | <10 <sup>6</sup>                    | 1,063 (86.6)                      |                                          |
|                        | D                                                                                                                                   | 2,189      | 921 (42.1)                      | 176 (19.1)                        | 186 (20.2)                          | 362 (39.3)                        |                                          |
|                        | YOI                                                                                                                                 | 815        | 440 (54.0)                      | 401 (91.1)                        | 6 (1.4)                             | 407 (92.5)                        |                                          |
| 2018/19                | A                                                                                                                                   | 1,670      | 432 (25.9)                      | 313 (72.5)                        | 58 (13.4)                           | 371 (85.9)                        |                                          |
|                        | B                                                                                                                                   | 9,442      | 7,782 (82.4)                    | 4,883 (62.7)                      | 149 (1.9)                           | 5,032 (64.7)                      |                                          |
|                        | C                                                                                                                                   | 6,204      | 3,811 (61.4)                    | 2,857 (75.0)                      | 240 (6.3)                           | 3,097 (81.3)                      |                                          |
|                        | Closed                                                                                                                              | 1,802      | 1,275 (70.8)                    | 1,185 (92.9)                      | <10 <sup>6</sup>                    | 1,186 (93.0)                      |                                          |
|                        | D                                                                                                                                   | 2,189      | 1,160 (53.0)                    | 1,005 (86.6)                      | 23 (2.0)                            | 1,028 (88.6)                      |                                          |
|                        | YOI                                                                                                                                 | 792        | 447 (56.4)                      | 418 (93.5)                        | 6 (1.3)                             | 424 (94.9)                        |                                          |
| 2019/20                | A                                                                                                                                   | 1,838      | 523 (28.5)                      | 315 (60.2)                        | 82 (15.7)                           | 397 (75.9)                        |                                          |
|                        | B                                                                                                                                   | 11,904     | 9,855 (82.8)                    | 5,499 (55.8)                      | 295 (3.0)                           | 5,794 (58.8)                      |                                          |
|                        | C                                                                                                                                   | 6,870      | 4,229 (61.6)                    | 2,840 (67.2)                      | 628 (14.8)                          | 3,468 (82.0)                      |                                          |
|                        | Closed                                                                                                                              | 2,245      | 1,651 (73.5)                    | 1,433 (86.8)                      | 17 (1.0)                            | 1,450 (87.8)                      |                                          |
|                        | D                                                                                                                                   | 2,149      | 1,258 (58.5)                    | 1,099 (87.4)                      | 48 (3.8)                            | 1,147 (91.2)                      |                                          |
|                        | YOI                                                                                                                                 | 805        | 441 (54.8)                      | 333 (75.5)                        | 50 (11.3)                           | 383 (86.8)                        |                                          |
| <b>Gender</b>          |                                                                                                                                     |            |                                 |                                   |                                     |                                   |                                          |
| 2017/18                | F                                                                                                                                   | 1,699      | 1,206 (71.0)                    | 1,058 (87.7)                      | <10 <sup>6</sup>                    | 1,060 (87.9)                      |                                          |
|                        | M                                                                                                                                   | 19,977     | 13,041 (65.3)                   | 6,059 (46.5)                      | 524 (4.0)                           | 6,583 (50.5)                      |                                          |
| 2018/19                | F                                                                                                                                   | 1,802      | 1,274 (70.7)                    | 1,184 (92.9)                      | <10 <sup>6</sup>                    | 1,187 (93.2)                      |                                          |
|                        | M                                                                                                                                   | 20,295     | 13,631 (67.2)                   | 9,476 (69.5)                      | 474 (3.5)                           | 9,950 (73.0)                      |                                          |
| 2019/20                | F                                                                                                                                   | 1,376      | 1,042 (75.7)                    | 952 (91.4)                        | <10 <sup>6</sup>                    | 952 (91.4)                        |                                          |
|                        | M                                                                                                                                   | 23,570     | 16,307 (69.2)                   | 10,087 (61.9)                     | 1,104 (6.8)                         | 11,191 (68.6)                     |                                          |

<sup>1</sup>Eligible for indicator; <sup>2</sup>Achieve in current prison; <sup>3</sup>Achieve in previous prison; <sup>4</sup>Overall achievement - either current or previous prison; <sup>5</sup>Declined indicator; <sup>6</sup>Suppressed (<10) to avoid disclosure

| Indicator              | The proportion of new receptions to prison who have been asked for consent to transfer medical records from GP to prison healthcare |                  |                                 |                                   |                                     | Community achievement<br>2019/20 (%): NA |                                   |
|------------------------|-------------------------------------------------------------------------------------------------------------------------------------|------------------|---------------------------------|-----------------------------------|-------------------------------------|------------------------------------------|-----------------------------------|
|                        | Group: Prison specific                                                                                                              |                  |                                 |                                   |                                     |                                          |                                   |
|                        | Variable                                                                                                                            | Population       | Eligible <sup>1</sup> (% popln) | Satisfy <sup>2</sup> (% eligible) | Elsewhere <sup>3</sup> (% eligible) |                                          | Achieve <sup>4</sup> (% eligible) |
| <b>Sentence Status</b> |                                                                                                                                     |                  |                                 |                                   |                                     |                                          |                                   |
| 2017/18                | .                                                                                                                                   | 81               | 77 (95.1)                       | <10 <sup>6</sup>                  | <10 <sup>6</sup>                    | <10 <sup>6</sup>                         |                                   |
|                        | Absconded                                                                                                                           | <10 <sup>0</sup> | <10 <sup>6</sup>                | <10 <sup>6</sup>                  | <10 <sup>6</sup>                    | <10 <sup>6</sup>                         |                                   |
|                        | Active In                                                                                                                           | 15,872           | 10,624 (66.9)                   | 6,717 (63.2)                      | 438 (4.1)                           | 7,155 (67.3)                             |                                   |
|                        | Active Out                                                                                                                          | 1,052            | 809 (76.9)                      | 254 (31.4)                        | 34 (4.2)                            | 288 (35.6)                               |                                   |
|                        | Convicted Sentence                                                                                                                  | 2,125            | 1,567 (73.7)                    | 80 (5.1)                          | 35 (2.2)                            | 115 (7.3)                                |                                   |
|                        | Downgrade in security category                                                                                                      | <10 <sup>0</sup> | <10 <sup>6</sup>                | <10 <sup>6</sup>                  | <10 <sup>6</sup>                    | <10 <sup>6</sup>                         |                                   |
|                        | Internal Cell Move                                                                                                                  | <10 <sup>0</sup> | <10 <sup>6</sup>                | <10 <sup>6</sup>                  | <10 <sup>6</sup>                    | <10 <sup>6</sup>                         |                                   |
|                        | Judges Remand                                                                                                                       | 92               | 53 (57.6)                       | <10 <sup>6</sup>                  | <10 <sup>6</sup>                    | <10 <sup>6</sup>                         |                                   |
|                        | Licence Revoke                                                                                                                      | 52               | 51 (98.1)                       | <10 <sup>6</sup>                  | <10 <sup>6</sup>                    | <10 <sup>6</sup>                         |                                   |
|                        | On Remand                                                                                                                           | 1,492            | 1,067 (71.5)                    | 58 (5.4)                          | 12 (1.1)                            | 70 (6.6)                                 |                                   |
|                        | Transfer                                                                                                                            | 910              | <10 <sup>6</sup>                | <10 <sup>6</sup>                  | <10 <sup>6</sup>                    | <10 <sup>6</sup>                         |                                   |
|                        | Upgrade in security category                                                                                                        | <10 <sup>0</sup> | <10 <sup>6</sup>                | <10 <sup>6</sup>                  | <10 <sup>6</sup>                    | <10 <sup>6</sup>                         |                                   |
| 2018/19                | .                                                                                                                                   | 88               | 84 (95.5)                       | <10 <sup>6</sup>                  | <10 <sup>6</sup>                    | <10 <sup>6</sup>                         |                                   |
|                        | Absconded                                                                                                                           | <10 <sup>0</sup> | <10 <sup>6</sup>                | <10 <sup>6</sup>                  | <10 <sup>6</sup>                    | <10 <sup>6</sup>                         |                                   |
|                        | Active In                                                                                                                           | 18,145           | 12,308 (67.8)                   | 10,028 (81.5)                     | 395 (3.2)                           | 10,423 (84.7)                            |                                   |
|                        | Active Out                                                                                                                          | 835              | 580 (69.5)                      | 450 (77.6)                        | <10 <sup>6</sup>                    | 459 (79.1)                               |                                   |
|                        | Convicted Sentence                                                                                                                  | 1,320            | 1,050 (79.5)                    | 125 (11.9)                        | 46 (4.4)                            | 171 (16.3)                               |                                   |
|                        | Downgrade in security category                                                                                                      | <10 <sup>0</sup> | <10 <sup>6</sup>                | <10 <sup>6</sup>                  | <10 <sup>6</sup>                    | <10 <sup>6</sup>                         |                                   |
|                        | Internal Cell Move                                                                                                                  | <10 <sup>0</sup> | <10 <sup>6</sup>                | <10 <sup>6</sup>                  | <10 <sup>6</sup>                    | <10 <sup>6</sup>                         |                                   |
|                        | Judges Remand                                                                                                                       | <10 <sup>0</sup> | <10 <sup>6</sup>                | <10 <sup>6</sup>                  | <10 <sup>6</sup>                    | <10 <sup>6</sup>                         |                                   |
|                        | Licence Revoke                                                                                                                      | 125              | 108 (86.4)                      | <10 <sup>6</sup>                  | <10 <sup>6</sup>                    | 10 (9.3)                                 |                                   |
|                        | On Remand                                                                                                                           | 1,059            | 768 (72.5)                      | 46 (6.0)                          | 17 (2.2)                            | 63 (8.2)                                 |                                   |
|                        | Transfer                                                                                                                            | 518              | <10 <sup>6</sup>                | <10 <sup>6</sup>                  | <10 <sup>6</sup>                    | <10 <sup>6</sup>                         |                                   |
|                        | Upgrade in security category                                                                                                        | <10 <sup>0</sup> | <10 <sup>6</sup>                | <10 <sup>6</sup>                  | <10 <sup>6</sup>                    | <10 <sup>6</sup>                         |                                   |
| 2019/20                | .                                                                                                                                   | 69               | 61 (88.4)                       | <10 <sup>6</sup>                  | <10 <sup>6</sup>                    | <10 <sup>6</sup>                         |                                   |
|                        | Absconded                                                                                                                           | <10 <sup>0</sup> | <10 <sup>6</sup>                | <10 <sup>6</sup>                  | <10 <sup>6</sup>                    | <10 <sup>6</sup>                         |                                   |
|                        | Active In                                                                                                                           | 22,424           | 15,308 (68.3)                   | 11,023 (72.0)                     | 1,008 (6.6)                         | 12,031 (78.6)                            |                                   |
|                        | Active Out                                                                                                                          | 625              | 448 (71.7)                      | 320 (71.4)                        | 13 (2.9)                            | 333 (74.3)                               |                                   |
|                        | Convicted Sentence                                                                                                                  | 1,361            | 1,148 (84.3)                    | 85 (7.4)                          | 60 (5.2)                            | 145 (12.6)                               |                                   |
|                        | Downgrade in security category                                                                                                      | <10 <sup>0</sup> | <10 <sup>6</sup>                | <10 <sup>6</sup>                  | <10 <sup>6</sup>                    | <10 <sup>6</sup>                         |                                   |
|                        | Internal Cell Move                                                                                                                  | <10 <sup>0</sup> | <10 <sup>6</sup>                | <10 <sup>6</sup>                  | <10 <sup>6</sup>                    | <10 <sup>6</sup>                         |                                   |
|                        | Judges Remand                                                                                                                       | 19               | 15 (78.9)                       | <10 <sup>6</sup>                  | <10 <sup>6</sup>                    | <10 <sup>6</sup>                         |                                   |
|                        | Licence Revoke                                                                                                                      | 178              | 156 (87.6)                      | 19 (12.2)                         | 11 (7.1)                            | 30 (19.2)                                |                                   |
|                        | On Remand                                                                                                                           | 1,031            | 781 (75.8)                      | 52 (6.7)                          | 21 (2.7)                            | 73 (9.3)                                 |                                   |
|                        | Transfer                                                                                                                            | 101              | 37 (36.6)                       | 12 (32.4)                         | <10 <sup>6</sup>                    | 16 (43.2)                                |                                   |
|                        | Upgrade in security category                                                                                                        | <10 <sup>0</sup> | <10 <sup>6</sup>                | <10 <sup>6</sup>                  | <10 <sup>6</sup>                    | <10 <sup>6</sup>                         |                                   |
| <b>Age - years</b>     |                                                                                                                                     |                  |                                 |                                   |                                     |                                          |                                   |
| 2017/18                | 10 - <20                                                                                                                            | 468              | 392 (83.8)                      | 287 (73.2)                        | <10 <sup>6</sup>                    | 295 (75.3)                               |                                   |
|                        | 20 - <30                                                                                                                            | 6,994            | 4,871 (69.6)                    | 2,450 (50.3)                      | 183 (3.8)                           | 2,633 (54.1)                             |                                   |
|                        | 30 - <40                                                                                                                            | 7,051            | 4,712 (66.8)                    | 2,369 (50.3)                      | 158 (3.4)                           | 2,527 (53.6)                             |                                   |
|                        | 40 - <50                                                                                                                            | 4,114            | 2,638 (64.1)                    | 1,263 (47.9)                      | 102 (3.9)                           | 1,365 (51.7)                             |                                   |
|                        | 50 - <60                                                                                                                            | 2,107            | 1,195 (56.7)                    | 542 (45.4)                        | 59 (4.9)                            | 601 (50.3)                               |                                   |
|                        | 60 - <70                                                                                                                            | 684              | 328 (48.0)                      | 147 (44.8)                        | 12 (3.7)                            | 159 (48.5)                               |                                   |
|                        | 70 - <80                                                                                                                            | 213              | 84 (39.4)                       | 52 (61.9)                         | <10 <sup>6</sup>                    | 56 (66.7)                                |                                   |
|                        | 80 - <90                                                                                                                            | 40               | 24 (60.0)                       | <10 <sup>6</sup>                  | <10 <sup>6</sup>                    | <10 <sup>6</sup>                         |                                   |
|                        | 90 - <100                                                                                                                           | <10 <sup>0</sup> | <10 <sup>6</sup>                | <10 <sup>6</sup>                  | <10 <sup>6</sup>                    | <10 <sup>6</sup>                         |                                   |
|                        | 100 - <110                                                                                                                          | <10 <sup>0</sup> | <10 <sup>6</sup>                | <10 <sup>6</sup>                  | <10 <sup>6</sup>                    | <10 <sup>6</sup>                         |                                   |
| 2018/19                | 10 - <20                                                                                                                            | 436              | 375 (86.0)                      | 334 (89.1)                        | <10 <sup>6</sup>                    | 336 (89.6)                               |                                   |
|                        | 20 - <30                                                                                                                            | 7,163            | 5,152 (71.9)                    | 3,639 (70.6)                      | 177 (3.4)                           | 3,816 (74.1)                             |                                   |
|                        | 30 - <40                                                                                                                            | 7,381            | 5,098 (69.1)                    | 3,652 (71.6)                      | 145 (2.8)                           | 3,797 (74.5)                             |                                   |
|                        | 40 - <50                                                                                                                            | 4,180            | 2,713 (64.9)                    | 1,952 (71.9)                      | 80 (2.9)                            | 2,032 (74.9)                             |                                   |
|                        | 50 - <60                                                                                                                            | 1,978            | 1,110 (56.1)                    | 767 (69.1)                        | 52 (4.7)                            | 819 (73.8)                               |                                   |
|                        | 60 - <70                                                                                                                            | 701              | 358 (51.1)                      | 251 (70.1)                        | 16 (4.5)                            | 267 (74.6)                               |                                   |
|                        | 70 - <80                                                                                                                            | 209              | 79 (37.8)                       | 57 (72.2)                         | <10 <sup>6</sup>                    | 62 (78.5)                                |                                   |
|                        | 80 - <90                                                                                                                            | 45               | 18 (40.0)                       | <10 <sup>6</sup>                  | <10 <sup>6</sup>                    | <10 <sup>6</sup>                         |                                   |
|                        | 90 - <100                                                                                                                           | <10 <sup>0</sup> | <10 <sup>6</sup>                | <10 <sup>6</sup>                  | <10 <sup>6</sup>                    | <10 <sup>6</sup>                         |                                   |
|                        | 100 - <110                                                                                                                          | <10 <sup>0</sup> | <10 <sup>6</sup>                | <10 <sup>6</sup>                  | <10 <sup>6</sup>                    | <10 <sup>6</sup>                         |                                   |
| 2019/20                | 10 - <20                                                                                                                            | 404              | 342 (84.7)                      | 226 (66.1)                        | 31 (9.1)                            | 257 (75.1)                               |                                   |
|                        | 20 - <30                                                                                                                            | 8,064            | 5,819 (72.2)                    | 3,642 (62.6)                      | 385 (6.6)                           | 4,027 (69.2)                             |                                   |
|                        | 30 - <40                                                                                                                            | 9,125            | 6,583 (72.1)                    | 4,278 (65.0)                      | 412 (6.3)                           | 4,690 (71.2)                             |                                   |
|                        | 40 - <50                                                                                                                            | 4,948            | 3,395 (68.6)                    | 2,275 (67.0)                      | 190 (5.6)                           | 2,465 (72.6)                             |                                   |
|                        | 50 - <60                                                                                                                            | 2,224            | 1,323 (59.5)                    | 821 (62.1)                        | 70 (5.3)                            | 891 (67.3)                               |                                   |
|                        | 60 - <70                                                                                                                            | 751              | 365 (48.6)                      | 205 (56.2)                        | 23 (6.3)                            | 228 (62.5)                               |                                   |
|                        | 70 - <80                                                                                                                            | 238              | 104 (43.7)                      | 57 (54.8)                         | <10 <sup>6</sup>                    | 64 (61.5)                                |                                   |
|                        | 80 - <90                                                                                                                            | 53               | 25 (47.2)                       | 15 (60.0)                         | <10 <sup>6</sup>                    | 17 (68.0)                                |                                   |
|                        | 90 - <100                                                                                                                           | <10 <sup>0</sup> | <10 <sup>6</sup>                | <10 <sup>6</sup>                  | <10 <sup>6</sup>                    | <10 <sup>6</sup>                         |                                   |
|                        | 100 - <110                                                                                                                          | <10 <sup>0</sup> | <10 <sup>6</sup>                | <10 <sup>6</sup>                  | <10 <sup>6</sup>                    | <10 <sup>6</sup>                         |                                   |

<sup>1</sup>Eligible for indicator; <sup>2</sup>Achieve in current prison; <sup>3</sup>Achieve in previous prison; <sup>4</sup>Overall achievement - either current or previous prison; <sup>5</sup>Declined indicator; <sup>6</sup>Suppressed (<10) to avoid disclosure

| Indicator                      | The proportion of new receptions to prison who have been asked for consent to transfer medical records from GP to prison healthcare |            |                                 |                                   |                                     | Community achievement<br>2019/20 (%): NA |                                   |
|--------------------------------|-------------------------------------------------------------------------------------------------------------------------------------|------------|---------------------------------|-----------------------------------|-------------------------------------|------------------------------------------|-----------------------------------|
|                                | Group: Prison specific                                                                                                              |            |                                 |                                   |                                     |                                          |                                   |
|                                | Variable                                                                                                                            | Population | Eligible <sup>1</sup> (% popln) | Satisfy <sup>2</sup> (% eligible) | Elsewhere <sup>3</sup> (% eligible) |                                          | Achieve <sup>4</sup> (% eligible) |
| <b>Length of Stay (months)</b> |                                                                                                                                     |            |                                 |                                   |                                     |                                          |                                   |
| 2017/18                        | <1                                                                                                                                  | 4,474      | 4,209 (94.1)                    | 1,877 (44.6)                      | 79 (1.9)                            | 1,956 (46.5)                             |                                   |
|                                | 1-<6                                                                                                                                | 8,075      | 6,274 (77.7)                    | 3,061 (48.8)                      | 240 (3.8)                           | 3,301 (52.6)                             |                                   |
|                                | 6-<12                                                                                                                               | 3,672      | 2,008 (54.7)                    | 1,055 (52.5)                      | 106 (5.3)                           | 1,161 (57.8)                             |                                   |
|                                | 12-<24                                                                                                                              | 2,832      | 1,113 (39.3)                    | 674 (60.6)                        | 51 (4.6)                            | 725 (65.1)                               |                                   |
|                                | 24+                                                                                                                                 | 2,624      | 644 (24.5)                      | 451 (70.0)                        | 50 (7.8)                            | 501 (77.8)                               |                                   |
| 2018/19                        | <1                                                                                                                                  | 4,801      | 4,551 (94.8)                    | 3,000 (65.9)                      | 81 (1.8)                            | 3,081 (67.7)                             |                                   |
|                                | 1-<6                                                                                                                                | 7,742      | 6,147 (79.4)                    | 4,436 (72.2)                      | 181 (2.9)                           | 4,617 (75.1)                             |                                   |
|                                | 6-<12                                                                                                                               | 3,616      | 2,082 (57.6)                    | 1,576 (75.7)                      | 63 (3.0)                            | 1,639 (78.7)                             |                                   |
|                                | 12-<24                                                                                                                              | 3,447      | 1,821 (52.8)                    | 1,403 (77.0)                      | 131 (7.2)                           | 1,534 (84.2)                             |                                   |
|                                | 24+                                                                                                                                 | 2,493      | 306 (12.3)                      | 246 (80.4)                        | 21 (6.9)                            | 267 (87.3)                               |                                   |
| 2019/20                        | <1                                                                                                                                  | 5,745      | 5,530 (96.3)                    | 3,276 (59.2)                      | 118 (2.1)                           | 3,394 (61.4)                             |                                   |
|                                | 1-<6                                                                                                                                | 9,697      | 7,922 (81.7)                    | 4,994 (63.0)                      | 565 (7.1)                           | 5,559 (70.2)                             |                                   |
|                                | 6-<12                                                                                                                               | 5,090      | 3,560 (69.9)                    | 2,451 (68.8)                      | 400 (11.2)                          | 2,851 (80.1)                             |                                   |
|                                | 12-<24                                                                                                                              | 3,244      | 945 (29.1)                      | 798 (84.4)                        | 37 (3.9)                            | 835 (88.4)                               |                                   |
|                                | 24+                                                                                                                                 | 2,035      | <10 <sup>6</sup>                | <10 <sup>6</sup>                  | <10 <sup>6</sup>                    | <10 <sup>6</sup>                         |                                   |
| <b>Ethnic Group</b>            |                                                                                                                                     |            |                                 |                                   |                                     |                                          |                                   |
| 2017/18                        | White                                                                                                                               | 15,638     | 10,182 (65.1)                   | 4,945 (48.6)                      | 424 (4.2)                           | 5,369 (52.7)                             |                                   |
|                                | Mixed                                                                                                                               | 431        | 247 (57.3)                      | 120 (48.6)                        | 10 (4.0)                            | 130 (52.6)                               |                                   |
|                                | Asian or Asian British                                                                                                              | 813        | 514 (63.2)                      | 188 (36.6)                        | 28 (5.4)                            | 216 (42.0)                               |                                   |
|                                | Black or Black British                                                                                                              | 404        | 247 (61.1)                      | 99 (40.1)                         | <10 <sup>6</sup>                    | 108 (43.7)                               |                                   |
|                                | Chinese and Other                                                                                                                   | 214        | 137 (64.0)                      | 42 (30.7)                         | <10 <sup>6</sup>                    | 49 (35.8)                                |                                   |
|                                | Unclassified                                                                                                                        | 372        | 207 (55.6)                      | 115 (55.6)                        | <10 <sup>6</sup>                    | 117 (56.5)                               |                                   |
| 2018/19                        | White                                                                                                                               | 14,911     | 9,618 (64.5)                    | 6,697 (69.6)                      | 357 (3.7)                           | 7,054 (73.3)                             |                                   |
|                                | Mixed                                                                                                                               | 371        | 212 (57.1)                      | 132 (62.3)                        | 14 (6.6)                            | 146 (68.9)                               |                                   |
|                                | Asian or Asian British                                                                                                              | 726        | 424 (58.4)                      | 289 (68.2)                        | 20 (4.7)                            | 309 (72.9)                               |                                   |
|                                | Black or Black British                                                                                                              | 364        | 224 (61.5)                      | 122 (54.5)                        | 13 (5.8)                            | 135 (60.3)                               |                                   |
|                                | Chinese and Other                                                                                                                   | 167        | 110 (65.9)                      | 71 (64.5)                         | <10 <sup>6</sup>                    | 74 (67.3)                                |                                   |
|                                | Unclassified                                                                                                                        | 409        | 252 (61.6)                      | 210 (83.3)                        | <10 <sup>6</sup>                    | 212 (84.1)                               |                                   |
| 2019/20                        | White                                                                                                                               | 16,606     | 11,251 (67.8)                   | 7,218 (64.2)                      | 797 (7.1)                           | 8,015 (71.2)                             |                                   |
|                                | Mixed                                                                                                                               | 409        | 250 (61.1)                      | 127 (50.8)                        | 28 (11.2)                           | 155 (62.0)                               |                                   |
|                                | Asian or Asian British                                                                                                              | 755        | 429 (56.8)                      | 273 (63.6)                        | 36 (8.4)                            | 309 (72.0)                               |                                   |
|                                | Black or Black British                                                                                                              | 451        | 285 (63.2)                      | 149 (52.3)                        | 41 (14.4)                           | 190 (66.7)                               |                                   |
|                                | Chinese and Other                                                                                                                   | 163        | 105 (64.4)                      | 54 (51.4)                         | <10 <sup>6</sup>                    | 62 (59.0)                                |                                   |
|                                | Unclassified                                                                                                                        | 387        | 228 (58.9)                      | 169 (74.1)                        | 12 (5.3)                            | 181 (79.4)                               |                                   |

<sup>1</sup>Eligible for indicator; <sup>2</sup>Achieve in current prison; <sup>3</sup>Achieve in previous prison; <sup>4</sup>Overall achievement - either current or previous prison; <sup>5</sup>Declined indicator; <sup>6</sup>Suppressed (<10) to avoid disclosure

| Indicator                      |                        | The proportion of new receptions to prison with a code for a second-stage health assessment in the past 12 months, plus clinical codes for in possession risk assessment and medicines reconciliation added in the week before the second-stage assessment |                                                                                                          |                                                                               |                                                                               |                  | Community achievement<br>2019/20 (%): NA |
|--------------------------------|------------------------|------------------------------------------------------------------------------------------------------------------------------------------------------------------------------------------------------------------------------------------------------------|----------------------------------------------------------------------------------------------------------|-------------------------------------------------------------------------------|-------------------------------------------------------------------------------|------------------|------------------------------------------|
| Group: Prison specific         |                        |                                                                                                                                                                                                                                                            |                                                                                                          |                                                                               |                                                                               |                  |                                          |
| Variable                       | Population             | Eligible - had a 2nd screen<br>assessment<br>(% popln)                                                                                                                                                                                                     | Both Medicines Reconciliation<br>(MR) and In-Possession (IP)<br>assessment within 7 days (%<br>eligible) | Had MR during stay, but did<br>not satisfy both within 7 days<br>(% eligible) | Had IP during stay, but did<br>not satisfy both within 7 days<br>(% eligible) |                  |                                          |
| <b>Year</b>                    |                        |                                                                                                                                                                                                                                                            |                                                                                                          |                                                                               |                                                                               |                  |                                          |
| 2019/20                        | 8,245                  | 6,173 (74.9)                                                                                                                                                                                                                                               | 2,359 (38.2)                                                                                             | 319 (5.2)                                                                     | 3,810 (61.7)                                                                  |                  |                                          |
| <b>Prison</b>                  |                        |                                                                                                                                                                                                                                                            |                                                                                                          |                                                                               |                                                                               |                  |                                          |
| 2019/20                        | Prison 1               | 486                                                                                                                                                                                                                                                        | 410 (84.4)                                                                                               | 408 (99.5)                                                                    | <10 <sup>6</sup>                                                              | <10 <sup>6</sup> |                                          |
|                                | Prison 2               | 764                                                                                                                                                                                                                                                        | 704 (92.1)                                                                                               | 602 (85.5)                                                                    | 101 (14.3)                                                                    | 102 (14.5)       |                                          |
|                                | Prison 3               | 1,137                                                                                                                                                                                                                                                      | 1,014 (89.2)                                                                                             | 24 (2.4)                                                                      | 14 (1.4)                                                                      | 986 (97.2)       |                                          |
|                                | Prison 4               | 1,309                                                                                                                                                                                                                                                      | 1,049 (80.1)                                                                                             | <10 <sup>6</sup>                                                              | <10 <sup>6</sup>                                                              | 1,049 (100.0)    |                                          |
|                                | Prison 5               | 208                                                                                                                                                                                                                                                        | 190 (91.3)                                                                                               | <10 <sup>6</sup>                                                              | <10 <sup>6</sup>                                                              | 185 (97.4)       |                                          |
|                                | Prison 6               | 465                                                                                                                                                                                                                                                        | 358 (77.0)                                                                                               | 246 (68.7)                                                                    | 55 (15.4)                                                                     | 112 (31.3)       |                                          |
|                                | Prison 7               | 261                                                                                                                                                                                                                                                        | 251 (96.2)                                                                                               | <10 <sup>6</sup>                                                              | <10 <sup>6</sup>                                                              | 246 (98.0)       |                                          |
|                                | Prison 8               | 350                                                                                                                                                                                                                                                        | 340 (97.1)                                                                                               | 221 (65.0)                                                                    | 119 (35.0)                                                                    | 119 (35.0)       |                                          |
|                                | Prison 9               | 827                                                                                                                                                                                                                                                        | 295 (35.7)                                                                                               | 13 (4.4)                                                                      | 10 (3.4)                                                                      | 282 (95.6)       |                                          |
|                                | Prison 10              | 666                                                                                                                                                                                                                                                        | 655 (98.3)                                                                                               | 653 (99.7)                                                                    | <10 <sup>6</sup>                                                              | <10 <sup>6</sup> |                                          |
|                                | Prison 11              | 890                                                                                                                                                                                                                                                        | 323 (36.3)                                                                                               | <10 <sup>6</sup>                                                              | <10 <sup>6</sup>                                                              | 323 (100.0)      |                                          |
|                                | Prison 12              | 308                                                                                                                                                                                                                                                        | 301 (97.7)                                                                                               | <10 <sup>6</sup>                                                              | <10 <sup>6</sup>                                                              | 298 (99.0)       |                                          |
|                                | Prison 13              | 574                                                                                                                                                                                                                                                        | 283 (49.3)                                                                                               | 179 (63.3)                                                                    | 10 (3.5)                                                                      | 104 (36.7)       |                                          |
| 2019/20                        | A                      | 1,401                                                                                                                                                                                                                                                      | 578 (41.3)                                                                                               | 192 (33.2)                                                                    | 20 (3.5)                                                                      | 386 (66.8)       |                                          |
|                                | B                      | 2,320                                                                                                                                                                                                                                                      | 1,682 (72.5)                                                                                             | 1,255 (74.6)                                                                  | 104 (6.2)                                                                     | 427 (25.4)       |                                          |
|                                | C                      | 2,932                                                                                                                                                                                                                                                      | 2,473 (84.3)                                                                                             | 432 (17.5)                                                                    | 16 (0.6)                                                                      | 2,037 (82.4)     |                                          |
|                                | Closed                 | 611                                                                                                                                                                                                                                                        | 591 (96.7)                                                                                               | 226 (38.2)                                                                    | 122 (20.6)                                                                    | 365 (61.8)       |                                          |
|                                | D                      | 673                                                                                                                                                                                                                                                        | 548 (81.4)                                                                                               | 251 (45.8)                                                                    | 55 (10.0)                                                                     | 297 (54.2)       |                                          |
|                                | YOI                    | 308                                                                                                                                                                                                                                                        | 301 (97.7)                                                                                               | <10 <sup>6</sup>                                                              | <10 <sup>6</sup>                                                              | 298 (99.0)       |                                          |
| <b>Gender</b>                  |                        |                                                                                                                                                                                                                                                            |                                                                                                          |                                                                               |                                                                               |                  |                                          |
| 2019/20                        | F                      | 611                                                                                                                                                                                                                                                        | 591 (96.7)                                                                                               | 227 (38.4)                                                                    | 122 (20.6)                                                                    | 364 (61.6)       |                                          |
|                                | M                      | 7,634                                                                                                                                                                                                                                                      | 5,582 (73.1)                                                                                             | 2,132 (38.2)                                                                  | 197 (3.5)                                                                     | 3,446 (61.7)     |                                          |
| <b>Sentence Status</b>         |                        |                                                                                                                                                                                                                                                            |                                                                                                          |                                                                               |                                                                               |                  |                                          |
| 2019/20                        | .                      | <10 <sup>6</sup>                                                                                                                                                                                                                                           | <10 <sup>6</sup>                                                                                         | <10 <sup>6</sup>                                                              | <10 <sup>6</sup>                                                              | <10 <sup>6</sup> |                                          |
|                                | Active In              | 7,542                                                                                                                                                                                                                                                      | 5,545 (73.5)                                                                                             | 1,889 (34.1)                                                                  | 247 (4.5)                                                                     | 3,652 (65.9)     |                                          |
|                                | Active Out             | 68                                                                                                                                                                                                                                                         | 56 (82.4)                                                                                                | 24 (42.9)                                                                     | <10 <sup>6</sup>                                                              | 32 (57.1)        |                                          |
|                                | Convicted Sentence     | 304                                                                                                                                                                                                                                                        | 270 (88.8)                                                                                               | 197 (73.0)                                                                    | 25 (9.3)                                                                      | 73 (27.0)        |                                          |
|                                | Judges Remand          | <10 <sup>6</sup>                                                                                                                                                                                                                                           | <10 <sup>6</sup>                                                                                         | <10 <sup>6</sup>                                                              | <10 <sup>6</sup>                                                              | <10 <sup>6</sup> |                                          |
|                                | Licence Revoke         | 33                                                                                                                                                                                                                                                         | 30 (90.9)                                                                                                | 27 (90.0)                                                                     | <10 <sup>6</sup>                                                              | <10 <sup>6</sup> |                                          |
|                                | On Remand              | 291                                                                                                                                                                                                                                                        | 267 (91.8)                                                                                               | 219 (82.0)                                                                    | 40 (15.0)                                                                     | 48 (18.0)        |                                          |
|                                | Transfer               | <10 <sup>6</sup>                                                                                                                                                                                                                                           | <10 <sup>6</sup>                                                                                         | <10 <sup>6</sup>                                                              | <10 <sup>6</sup>                                                              | <10 <sup>6</sup> |                                          |
| <b>Age - years</b>             |                        |                                                                                                                                                                                                                                                            |                                                                                                          |                                                                               |                                                                               |                  |                                          |
| 2019/20                        | 10 - <20               | 147                                                                                                                                                                                                                                                        | 116 (78.9)                                                                                               | 30 (25.9)                                                                     | <10 <sup>6</sup>                                                              | 86 (74.1)        |                                          |
|                                | 20 - <30               | 2,325                                                                                                                                                                                                                                                      | 1,833 (78.8)                                                                                             | 719 (39.2)                                                                    | 80 (4.4)                                                                      | 1,113 (60.7)     |                                          |
|                                | 30 - <40               | 2,799                                                                                                                                                                                                                                                      | 2,191 (78.3)                                                                                             | 848 (38.7)                                                                    | 112 (5.1)                                                                     | 1,340 (61.2)     |                                          |
|                                | 40 - <50               | 1,687                                                                                                                                                                                                                                                      | 1,257 (74.5)                                                                                             | 484 (38.5)                                                                    | 74 (5.9)                                                                      | 773 (61.5)       |                                          |
|                                | 50 - <60               | 816                                                                                                                                                                                                                                                        | 530 (65.0)                                                                                               | 207 (39.1)                                                                    | 35 (6.6)                                                                      | 323 (60.9)       |                                          |
|                                | 60 - <70               | 337                                                                                                                                                                                                                                                        | 188 (55.8)                                                                                               | 51 (27.1)                                                                     | <10 <sup>6</sup>                                                              | 137 (72.9)       |                                          |
|                                | 70 - <80               | 114                                                                                                                                                                                                                                                        | 48 (42.1)                                                                                                | 14 (29.2)                                                                     | <10 <sup>6</sup>                                                              | 34 (70.8)        |                                          |
|                                | 80 - <90               | 20                                                                                                                                                                                                                                                         | 10 (50.0)                                                                                                | <10 <sup>6</sup>                                                              | <10 <sup>6</sup>                                                              | <10 <sup>6</sup> |                                          |
| <b>Length of Stay (months)</b> |                        |                                                                                                                                                                                                                                                            |                                                                                                          |                                                                               |                                                                               |                  |                                          |
|                                | 1-<6                   | 2,713                                                                                                                                                                                                                                                      | 2,230 (82.2)                                                                                             | 913 (40.9)                                                                    | 160 (7.2)                                                                     | 1,315 (59.0)     |                                          |
|                                | 6-<12                  | 1,696                                                                                                                                                                                                                                                      | 1,487 (87.7)                                                                                             | 604 (40.6)                                                                    | 45 (3.0)                                                                      | 882 (59.3)       |                                          |
|                                | 12-<24                 | 1,416                                                                                                                                                                                                                                                      | 1,173 (82.8)                                                                                             | 364 (31.0)                                                                    | 47 (4.0)                                                                      | 808 (68.9)       |                                          |
|                                | 24+                    | 1,352                                                                                                                                                                                                                                                      | 492 (36.4)                                                                                               | 123 (25.0)                                                                    | 29 (5.9)                                                                      | 369 (75.0)       |                                          |
| <b>Ethnic Group</b>            |                        |                                                                                                                                                                                                                                                            |                                                                                                          |                                                                               |                                                                               |                  |                                          |
|                                | Mixed                  | 187                                                                                                                                                                                                                                                        | 139 (74.3)                                                                                               | 72 (51.8)                                                                     | 13 (9.4)                                                                      | 66 (47.5)        |                                          |
|                                | Asian or Asian British | 313                                                                                                                                                                                                                                                        | 241 (77.0)                                                                                               | 137 (56.8)                                                                    | 10 (4.1)                                                                      | 104 (43.2)       |                                          |
|                                | Black or Black British | 211                                                                                                                                                                                                                                                        | 150 (71.1)                                                                                               | 65 (43.3)                                                                     | <10 <sup>6</sup>                                                              | 85 (56.7)        |                                          |
|                                | Chinese and Other      | 83                                                                                                                                                                                                                                                         | 63 (75.9)                                                                                                | 44 (69.8)                                                                     | <10 <sup>6</sup>                                                              | 18 (28.6)        |                                          |
|                                | Unclassified           | 128                                                                                                                                                                                                                                                        | 74 (57.8)                                                                                                | 37 (50.0)                                                                     | <10 <sup>6</sup>                                                              | 37 (50.0)        |                                          |

<sup>1</sup>Eligible for indicator; <sup>2</sup>Achieve in current prison; <sup>3</sup>Achieve in previous prison; <sup>4</sup>Overall achievement - either current or previous prison; <sup>5</sup>Declined indicator; <sup>6</sup>Suppressed (<10) to avoid disclosure

**Supplementary section 3: Multi-level mixed effects logistic regression model results for each indicator**

| Indicator                      | <i>The proportion of people with diabetes in whom the last blood pressure reading (measured in the preceding 12 months) is 140/80 mmHg or less</i> |                                        |                |               |               |                                    |                         |
|--------------------------------|----------------------------------------------------------------------------------------------------------------------------------------------------|----------------------------------------|----------------|---------------|---------------|------------------------------------|-------------------------|
|                                | Group: Diabetes, Asthma & Epilepsy Care                                                                                                            |                                        |                |               |               |                                    |                         |
|                                |                                                                                                                                                    | Univariate                             |                | Multivariable |               |                                    |                         |
|                                | Variable                                                                                                                                           | Odds Ratio (OR) of achieving indicator | (95% CI) of OR | OR            | (95% CI)      | Probability of achieving indicator | (95% CI) of probability |
| <b>Year</b>                    | 2017/18 (comparator)                                                                                                                               | 1.0                                    | -              | 1.0           | -             | 0.33                               | -                       |
|                                | 2018/19                                                                                                                                            | 0.97                                   | (0.78, 1.21)   | 0.92          | (0.71, 1.19)  | 0.32                               | -                       |
|                                | 2019/20                                                                                                                                            | 0.98                                   | (0.79, 1.22)   | 1.17          | (0.9, 1.51)   | 0.37                               | -                       |
| <b>Prison</b>                  | Prison 1                                                                                                                                           | 2.41                                   | (1.44, 4.02)   | 2.69          | (1.34, 5.38)  | 0.47                               | -                       |
|                                | Prison 2                                                                                                                                           | 1.29                                   | (0.88, 1.9)    | 1.30          | (0.81, 2.09)  | 0.33                               | -                       |
|                                | Prison 3                                                                                                                                           | 2.18                                   | (1.52, 3.15)   | 2.18          | (1.31, 3.63)  | 0.42                               | -                       |
|                                | Prison 4                                                                                                                                           | 3.14                                   | (2.07, 4.77)   | 3.42          | (2.01, 5.82)  | 0.52                               | -                       |
|                                | Prison 5                                                                                                                                           | 2.13                                   | (1.23, 3.69)   | 2.86          | (1.42, 5.77)  | 0.48                               | -                       |
|                                | Prison 6                                                                                                                                           | 2.03                                   | (1.34, 3.09)   | 2.89          | (1.63, 5.12)  | 0.48                               | -                       |
|                                | Prison 7                                                                                                                                           | 1.99                                   | (1.14, 3.47)   | 0.00          | (0, 0)        | 0.03                               | -                       |
|                                | Prison 8                                                                                                                                           | 5.66                                   | (3.54, 9.03)   | 0.00          | (0, 0)        | 0.05                               | -                       |
|                                | Prison 9                                                                                                                                           | 1.10                                   | (0.76, 1.58)   | 0.95          | (0.55, 1.63)  | 0.28                               | -                       |
|                                | Prison 10                                                                                                                                          | 2.36                                   | (1.64, 3.39)   | 2.63          | (1.65, 4.16)  | 0.46                               | -                       |
|                                | Prison 11 (comparator)                                                                                                                             | 1.0                                    | -              | 1.0           | -             | 0.28                               | -                       |
|                                | Prison 12                                                                                                                                          | 2.93                                   | (0.87, 9.88)   | 2.52          | (0.58, 11.05) | 0.45                               | -                       |
|                                | Prison 13                                                                                                                                          | 1.80                                   | (1.15, 2.82)   | 1.41          | (0.75, 2.67)  | 0.34                               | -                       |
| <b>Prison category</b>         | A (comparator)                                                                                                                                     | 1.0                                    | -              |               |               |                                    |                         |
|                                | B                                                                                                                                                  | 1.12                                   | (0.86, 1.45)   |               |               |                                    |                         |
|                                | C                                                                                                                                                  | 1.94                                   | (1.47, 2.57)   |               |               |                                    |                         |
|                                | Closed                                                                                                                                             | 2.94                                   | (2.05, 4.22)   |               |               |                                    |                         |
|                                | D                                                                                                                                                  | 1.61                                   | (1.14, 2.27)   |               |               |                                    |                         |
|                                | YOI                                                                                                                                                | 2.29                                   | (0.69, 7.63)   |               |               |                                    |                         |
| <b>Gender</b>                  | Female (comparator)                                                                                                                                | 1.0                                    | -              | 1.0           | -             | 0.96                               | -                       |
|                                | Male                                                                                                                                               | 0.44                                   | (0.32, 0.6)    | -             | -             | 0.29                               | -                       |
| <b>Age - years</b>             | 10 - <20                                                                                                                                           | 2.22                                   | (0.31, 15.95)  | 1.79          | (0.24, 13.51) | 0.43                               | -                       |
|                                | 20 - <30                                                                                                                                           | 2.48                                   | (1.766, 3.47)  | 2.82          | (1.87, 4.3)   | 0.53                               | -                       |
|                                | 30 - <40                                                                                                                                           | 1.47                                   | (1.103, 1.95)  | 1.59          | (1.13, 2.2)   | 0.40                               | -                       |
|                                | 40 - <50                                                                                                                                           | 0.95                                   | (0.733, 1.23)  | 0.98          | (0.72, 1.3)   | 0.30                               | -                       |
|                                | 50 - <60 (comparator)                                                                                                                              | 1.0                                    | -              | 1.0           | -             | 0.30                               | -                       |
|                                | 60 - <70                                                                                                                                           | 0.88                                   | (0.662, 1.16)  | 0.88          | (0.63, 1.2)   | 0.28                               | -                       |
|                                | 70 - <80                                                                                                                                           | 1.16                                   | (0.798, 1.7)   | 1.17          | (0.76, 1.8)   | 0.34                               | -                       |
|                                | 80 - <90                                                                                                                                           | 1.97                                   | (0.985, 3.96)  | 2.15          | (1.003, 4.6)  | 0.47                               | -                       |
|                                | 90 - <100                                                                                                                                          | 2.21                                   | (0.137, 35.58) | 1.76          | (0.09, 33.25) | 0.43                               | -                       |
|                                | 100 - <110                                                                                                                                         | -                                      | -              | -             | -             | -                                  | -                       |
| <b>Length of Stay (months)</b> | <1                                                                                                                                                 | 0.97                                   | (0.73, 1.27)   | 1.23          | (0.87, 1.74)  | 0.33                               | -                       |
|                                | 1-<6 (comparator)                                                                                                                                  | 1.0                                    | -              | 1.0           | -             | 0.29                               | -                       |
|                                | 6-<12                                                                                                                                              | 0.96                                   | (0.72, 1.29)   | 1.03          | (0.73, 1.45)  | 0.30                               | -                       |
|                                | 12-<24                                                                                                                                             | 0.97                                   | (0.73, 1.28)   | 1.12          | (0.78, 1.61)  | 0.31                               | -                       |
|                                | 24+                                                                                                                                                | 1.08                                   | (0.84, 1.38)   | 1.95          | (1.34, 2.85)  | 0.43                               | -                       |
| <b>Ethnic Group</b>            | White (comparator)                                                                                                                                 | 1.0                                    | -              | 1.0           | -             | 0.34                               | -                       |
|                                | Mixed                                                                                                                                              | 1.36                                   | (0.7, 2.67)    | 1.36          | (0.65, 2.81)  | 0.41                               | -                       |
|                                | Asian or Asian British                                                                                                                             | 0.63                                   | (0.4, 0.99)    | 0.58          | (0.36, 0.95)  | 0.24                               | -                       |
|                                | Black or Black British                                                                                                                             | 0.65                                   | (0.34, 1.24)   | 0.76          | (0.39, 1.48)  | 0.29                               | -                       |
|                                | Chinese and Other                                                                                                                                  | 0.87                                   | (0.3, 2.52)    | 0.49          | (0.15, 1.61)  | 0.21                               | -                       |
|                                | Unclassified                                                                                                                                       | 1.77                                   | (0.85, 3.7)    | 1.80          | (0.83, 3.95)  | 0.47                               | -                       |



| Indicator                      | The percentage of patients with diabetes who have had the following care processes performed in the preceding 12 months: BMI measurement; BP measurement; HbA1c measurement; Cholesterol measurement; Record of smoking status; Foot examination; Albumin: creatinine ratio; Serum creatinine measurement |              |             |                                  |                           |                |                  |              |           |                |       |               |      |               |
|--------------------------------|-----------------------------------------------------------------------------------------------------------------------------------------------------------------------------------------------------------------------------------------------------------------------------------------------------------|--------------|-------------|----------------------------------|---------------------------|----------------|------------------|--------------|-----------|----------------|-------|---------------|------|---------------|
|                                | Group: Diabetes, Asthma & Epilepsy Care                                                                                                                                                                                                                                                                   |              |             |                                  |                           |                |                  |              |           |                |       |               |      |               |
| Variable                       | BMI                                                                                                                                                                                                                                                                                                       | HbA1c        | Cholesterol | Univariate: Odds ratios (95% CI) |                           |                | Serum Creatinine | BP           | Foot Exam |                |       |               |      |               |
|                                |                                                                                                                                                                                                                                                                                                           |              |             | Smoking Status                   | Albumin: Creatinine Ratio |                |                  |              |           |                |       |               |      |               |
| <b>Year</b>                    |                                                                                                                                                                                                                                                                                                           |              |             |                                  |                           |                |                  |              |           |                |       |               |      |               |
| 2017/18 (comparator)           | 1.0                                                                                                                                                                                                                                                                                                       | -            | 1.0         | -                                | 1.0                       | -              | 1.0              | -            | 1.0       | -              | 1.0   | -             | 1.0  | -             |
| 2018/19                        | 1.84                                                                                                                                                                                                                                                                                                      | (1.42, 2.4)  | 1.02        | (0.82, 1.27)                     | 1.13                      | (0.91, 1.39)   | 1.44             | (1.09, 1.92) | 1.18      | (0.93, 1.49)   | 0.27  | (0.09, 0.81)  | 1.47 | (1.07, 2.02)  |
| 2019/20                        | 2.29                                                                                                                                                                                                                                                                                                      | (1.75, 3)    | 1.06        | (0.85, 1.27)                     | 1.18                      | (0.96, 1.45)   | 1.21             | (0.92, 1.58) | 0.98      | (0.77, 1.24)   | 0.25  | (0.08, 0.75)  | 2.68 | (1.87, 3.84)  |
| <b>Prison</b>                  |                                                                                                                                                                                                                                                                                                           |              |             |                                  |                           |                |                  |              |           |                |       |               |      |               |
| Prison 1                       | 1.43                                                                                                                                                                                                                                                                                                      | (0.69, 2.97) | 4.97        | (2.86, 8.63)                     | 6.28                      | (3.72, 10.62)  | 1.97             | (1.02, 3.83) | 3.15      | (1.71, 5.83)   | 9.60  | (6.98, 94.25) | 1.22 | (0.55, 2.75)  |
| Prison 2                       | 0.89                                                                                                                                                                                                                                                                                                      | (0.58, 1.36) | 2.69        | (1.49, 2.92)                     | 2.73                      | (1.91, 3.91)   | 1.94             | (1.26, 2.99) | 2.60      | (1.65, 4.15)   | 0.90  | (0.66, 14.66) | 1.31 | (0.77, 2.25)  |
| Prison 3                       | 0.79                                                                                                                                                                                                                                                                                                      | (0.51, 1.22) | 3.83        | (2.69, 5.45)                     | 4.05                      | (2.83, 5.8)    | 1.22             | (0.82, 1.81) | 3.66      | (2.34, 5.75)   | 1.04  | (0.66, 16.82) | 1.21 | (0.71, 2.06)  |
| Prison 4                       | 0.80                                                                                                                                                                                                                                                                                                      | (0.49, 1.31) | 5.44        | (3.5, 8.47)                      | 9.03                      | (5.79, 14.07)  | 1.13             | (0.71, 1.8)  | 5.80      | (3.55, 9.47)   | 0.57  | (0.24, 30.84) | 1.21 | (0.71, 2.06)  |
| Prison 5                       | 0.46                                                                                                                                                                                                                                                                                                      | (0.25, 0.83) | 4.04        | (2.29, 7.11)                     | 4.94                      | (2.86, 8.51)   | 1.32             | (0.7, 2.51)  | 4.47      | (2.42, 8.26)   | 0.66  | (0.32, 1.35)  | 1.21 | (0.71, 2.06)  |
| Prison 6                       | 1.86                                                                                                                                                                                                                                                                                                      | (1.06, 3.62) | 4.52        | (2.97, 6.99)                     | 6.07                      | (4.4, 23)      | 2.72             | (1.55, 4.78) | 7.59      | (4.71, 12.24)  | 22.26 | (10.2, 63.87) | 2.26 | (1.37, 33.57) |
| Prison 7                       | 1.54                                                                                                                                                                                                                                                                                                      | (0.69, 3.43) | 2.88        | (1.68, 4.93)                     | 4.88                      | (2.83, 8.41)   | 1.79             | (0.9, 3.58)  | 0.41      | (0.12, 1.36)   | -     | -             | 2.22 | (0.76, 6.48)  |
| Prison 8                       | 0.52                                                                                                                                                                                                                                                                                                      | (0.31, 0.88) | 1.79        | (1.16, 2.78)                     | 1.35                      | (0.82, 2.2)    | 1.77             | (1.1, 3.15)  | 0.91      | (0.44, 1.92)   | -     | -             | 1.30 | (0.62, 2.72)  |
| Prison 9                       | 1.55                                                                                                                                                                                                                                                                                                      | (0.98, 2.45) | 12.87       | (8.55, 19.43)                    | 17.94                     | (12.09, 26.66) | 4.40             | (2.63, 7.03) | 4.61      | (3.02, 7.06)   | 0.82  | (0.05, 13.16) | 2.27 | (1.26, 4.07)  |
| Prison 10                      | 0.42                                                                                                                                                                                                                                                                                                      | (0.28, 0.62) | 1.38        | (0.99, 1.93)                     | 1.82                      | (1.27, 2.62)   | 1.49             | (0.99, 2.23) | 0.61      | (0.33, 1.14)   | -     | -             | 0.65 | (0.41, 1.05)  |
| Prison 11 (comparator)         | 1.0                                                                                                                                                                                                                                                                                                       | -            | 1.0         | -                                | 1.0                       | -              | 1.0              | -            | 1.0       | -              | 1.0   | -             | 1.0  | -             |
| Prison 12                      | 2.14                                                                                                                                                                                                                                                                                                      | (0.26, 17.3) | 4.40        | (1.15, 16.92)                    | 2.82                      | (0.84, 9.53)   | 1.54             | (0.33, 7.32) | 5.17      | (1.44, 18.59)  | -     | -             | 1.44 | (0.18, 11.69) |
| Prison 13                      | 1.83                                                                                                                                                                                                                                                                                                      | (0.96, 3.5)  | 19.30       | (9.75, 38.22)                    | 32.35                     | (17.03, 62.22) | 2.98             | (1.98, 5.57) | 30.43     | (17.62, 52.57) | 1.89  | (0.12, 30.58) | 2.44 | (1.06, 5.63)  |
| <b>Prison category</b>         |                                                                                                                                                                                                                                                                                                           |              |             |                                  |                           |                |                  |              |           |                |       |               |      |               |
| A (comparator)                 | 1.0                                                                                                                                                                                                                                                                                                       | -            | 1.0         | -                                | 1.0                       | -              | 1.0              | -            | 1.0       | -              | 1.0   | -             | 1.0  | -             |
| B                              | 0.44                                                                                                                                                                                                                                                                                                      | (0.31, 0.62) | 0.10        | (0.07, 0.13)                     | 0.08                      | (0.06, 0.11)   | 0.35             | (0.24, 0.51) | 0.17      | (0.13, 0.22)   | 0.52  | (0.07, 3.72)  | 0.40 | (0.26, 0.63)  |
| C                              | 0.53                                                                                                                                                                                                                                                                                                      | (0.36, 0.77) | 0.31        | (0.22, 0.45)                     | 0.27                      | (0.19, 0.37)   | 0.34             | (0.22, 0.5)  | 0.53      | (0.41, 0.7)    | 0.39  | (0.53, 13.16) | 0.39 | (0.24, 0.62)  |
| Closed                         | 0.45                                                                                                                                                                                                                                                                                                      | (0.28, 0.73) | 0.15        | (0.1, 0.23)                      | 0.11                      | (0.07, 0.17)   | 0.47             | (0.27, 0.79) | 0.09      | (0.05, 0.17)   | -     | -             | 0.68 | (0.34, 1.34)  |
| D                              | 0.66                                                                                                                                                                                                                                                                                                      | (0.42, 1.06) | 0.30        | (0.2, 0.47)                      | 0.27                      | (0.19, 0.4)    | 0.55             | (0.33, 0.91) | 0.83      | (0.6, 1.15)    | 11.97 | (2.64, 54.17) | 1.80 | (0.5, 2)      |
| YOL                            | 1.31                                                                                                                                                                                                                                                                                                      | (0.64, 10.6) | 0.31        | (0.08, 1.2)                      | 0.14                      | (0.04, 0.46)   | 0.40             | (0.08, 1.94) | 0.67      | (0.19, 2.31)   | -     | -             | 0.62 | (0.08, 5.11)  |
| <b>Gender</b>                  |                                                                                                                                                                                                                                                                                                           |              |             |                                  |                           |                |                  |              |           |                |       |               |      |               |
| Female (comparator)            | 1.0                                                                                                                                                                                                                                                                                                       | -            | 1.0         | -                                | 1.0                       | -              | 1.0              | -            | 1.0       | -              | 1.0   | -             | 1.0  | -             |
| Male                           | 1.23                                                                                                                                                                                                                                                                                                      | (0.81, 1.86) | 1.54        | (1.1, 2.16)                      | 2.23                      | (1.57, 3.16)   | 0.87             | (0.55, 1.4)  | 4.86      | (2.61, 9.05)   | -     | -             | 0.71 | (0.39, 1.31)  |
| <b>Age - years</b>             |                                                                                                                                                                                                                                                                                                           |              |             |                                  |                           |                |                  |              |           |                |       |               |      |               |
| 10 -<20                        | 0.55                                                                                                                                                                                                                                                                                                      | (0.05, 6.39) | 0.21        | (0.02, 2.32)                     | -                         | -              | 0.42             | (0.04, 4.66) | -         | -              | -     | -             | 0.25 | (0.02, 2.98)  |
| 20 -<30                        | 0.83                                                                                                                                                                                                                                                                                                      | (0.51, 1.31) | 0.44        | (0.31, 0.64)                     | 0.29                      | (0.19, 0.42)   | 1.05             | (0.63, 1.73) | 0.48      | (0.3, 0.75)    | 0.69  | (0.08, 5.7)   | 0.87 | (0.49, 1.57)  |
| 30 -<40                        | 0.82                                                                                                                                                                                                                                                                                                      | (0.58, 1.17) | 0.43        | (0.32, 0.57)                     | 0.50                      | (0.37, 0.66)   | 0.87             | (0.6, 1.27)  | 0.40      | (0.28, 0.57)   | 0.70  | (0.14, 3.43)  | 0.96 | (0.6, 1.53)   |
| 40 -<50                        | 1.06                                                                                                                                                                                                                                                                                                      | (0.76, 1.45) | 0.54        | (0.42, 0.69)                     | 0.61                      | (0.48, 0.78)   | 0.92             | (0.67, 1.26) | 0.52      | (0.39, 0.69)   | 0.97  | (0.3, 3.08)   | 0.77 | (0.53, 1.12)  |
| 50 -<60 (comparator)           | 1.0                                                                                                                                                                                                                                                                                                       | -            | 1.0         | -                                | 1.0                       | -              | 1.0              | -            | 1.0       | -              | 1.0   | -             | 1.0  | -             |
| 60 -<70                        | 1.05                                                                                                                                                                                                                                                                                                      | (0.76, 1.46) | 1.07        | (0.81, 1.41)                     | 1.23                      | (0.95, 1.59)   | 0.88             | (0.63, 1.23) | 1.11      | (0.85, 1.45)   | 0.93  | (0.27, 3.22)  | 1.08 | (0.71, 1.65)  |
| 70 -<80                        | 0.89                                                                                                                                                                                                                                                                                                      | (0.57, 1.38) | 1.17        | (0.79, 1.74)                     | 1.11                      | (0.78, 1.6)    | 0.83             | (0.52, 1.31) | 1.11      | (0.77, 1.63)   | 1.77  | (0.45, 6.95)  | 1.80 | (0.56, 5.78)  |
| 80 -<90                        | 2.66                                                                                                                                                                                                                                                                                                      | (0.8, 8.88)  | 1.77        | (0.76, 4.1)                      | 0.98                      | (0.5, 1.93)    | 0.80             | (0.34, 1.87) | 0.90      | (0.44, 1.86)   | -     | -             | 4.26 | (0.57, 31.69) |
| 90 -<100                       | -                                                                                                                                                                                                                                                                                                         | -            | -           | -                                | -                         | -              | 0.37             | (0.03, 4.15) | 1.07      | (0.1, 11.89)   | -     | -             | -    | 2.65          |
| 100 -<110                      | -                                                                                                                                                                                                                                                                                                         | -            | -           | -                                | -                         | -              | -                | -            | -         | -              | -     | -             | -    | -             |
| <b>Length of Stay (months)</b> |                                                                                                                                                                                                                                                                                                           |              |             |                                  |                           |                |                  |              |           |                |       |               |      |               |
| <1                             | 1.67                                                                                                                                                                                                                                                                                                      | (1.14, 2.46) | 0.28        | (0.21, 0.39)                     | 0.34                      | (0.25, 0.48)   | 1.01             | (0.7, 1.44)  | 0.34      | (0.2, 0.57)    | 0.92  | (0.17, 5.06)  | 1.81 | (1.12, 2.91)  |
| 1-4 (comparator)               | 1.0                                                                                                                                                                                                                                                                                                       | -            | 1.0         | -                                | 1.0                       | -              | 1.0              | -            | 1.0       | -              | 1.0   | -             | 1.0  | -             |
| 5-12                           | 0.90                                                                                                                                                                                                                                                                                                      | (0.65, 1.25) | 2.80        | (2.09, 3.73)                     | 2.46                      | (1.88, 3.23)   | 0.79             | (0.56, 1.1)  | 1.80      | (1.28, 2.51)   | 2.54  | (0.71, 9.09)  | 0.91 | (0.62, 1.34)  |
| 12-24                          | 1.00                                                                                                                                                                                                                                                                                                      | (0.71, 1.4)  | 3.68        | (2.71, 5.02)                     | 3.84                      | (2.88, 5.12)   | 1.02             | (0.71, 1.46) | 3.37      | (2.46, 4.62)   | 3.72  | (1.1, 12.52)  | 1.23 | (0.81, 1.86)  |
| 24+                            | 1.26                                                                                                                                                                                                                                                                                                      | (0.93, 1.7)  | 8.28        | (6.06, 11.32)                    | 8.52                      | (6.45, 11.25)  | 1.36             | (0.98, 1.89) | 4.46      | (3.37, 5.91)   | 0.47  | (0.09, 2.61)  | 2.33 | (1.54, 3.52)  |
| <b>Ethnic Group</b>            |                                                                                                                                                                                                                                                                                                           |              |             |                                  |                           |                |                  |              |           |                |       |               |      |               |
| White (comparator)             | 1.0                                                                                                                                                                                                                                                                                                       | -            | 1.0         | -                                | 1.0                       | -              | 1.0              | -            | 1.0       | -              | 1.0   | -             | 1.0  | -             |
| Mixed                          | 1.94                                                                                                                                                                                                                                                                                                      | (0.68, 5.88) | 0.94        | (0.47, 1.91)                     | 1.52                      | (0.75, 3.08)   | 1.43             | (0.5, 4.1)   | 1.42      | (0.7, 2.89)    | 6.61  | (1.4, 31.19)  | 2.04 | (0.48, 8.63)  |
| Asian or Asian British         | 0.80                                                                                                                                                                                                                                                                                                      | (0.5, 1.29)  | 0.94        | (0.62, 1.42)                     | 0.98                      | (0.66, 1.45)   | 0.74             | (0.45, 1.22) | 1.03      | (0.67, 1.59)   | 1.17  | (0.15, 9.11)  | 0.89 | (0.48, 1.67)  |
| Black or Black British         | 1.64                                                                                                                                                                                                                                                                                                      | (0.69, 3.92) | 1.24        | (0.66, 2.33)                     | 1.25                      | (0.7, 2.23)    | 1.08             | (0.48, 2.43) | 0.94      | (0.5, 1.8)     | 5.78  | (1.24, 27.05) | 1.72 | (0.53, 5.63)  |
| Chinese and Other              | 0.46                                                                                                                                                                                                                                                                                                      | (0.18, 1.19) | 1.09        | (0.41, 2.88)                     | 0.91                      | (0.37, 2.25)   | 0.72             | (0.24, 2.21) | 3.07      | (1.24, 7.68)   | -     | -             | 0.29 | (0.11, 0.78)  |
| Unclassified                   | 0.47                                                                                                                                                                                                                                                                                                      | (0.22, 0.99) | 1.70        | (0.73, 3.98)                     | 1.28                      | (0.61, 2.65)   | 0.54             | (0.24, 1.23) | 1.32      | (0.62, 2.83)   | -     | -             | 1.20 | (0.36, 4.03)  |

| The percentage of patients with diabetes who have had the following care processes performed in the preceding 12 months: BMI measurement; BP measurement; HbA1c measurement; Cholesterol measurement; Record of smoking status; Foot examination; Albumin: creatinine ratio; Serum creatinine measurement |                    |                                             |                   |                                             |                    |                                             |                    |                                             |                    |                                             |                      |                                             |                    |                                             |                    |                                             |
|-----------------------------------------------------------------------------------------------------------------------------------------------------------------------------------------------------------------------------------------------------------------------------------------------------------|--------------------|---------------------------------------------|-------------------|---------------------------------------------|--------------------|---------------------------------------------|--------------------|---------------------------------------------|--------------------|---------------------------------------------|----------------------|---------------------------------------------|--------------------|---------------------------------------------|--------------------|---------------------------------------------|
| Domain: Routine primary care                                                                                                                                                                                                                                                                              |                    |                                             |                   |                                             |                    |                                             |                    |                                             |                    |                                             |                      |                                             |                    |                                             |                    |                                             |
| Variable                                                                                                                                                                                                                                                                                                  | BMI                |                                             | HbA1c             |                                             | Cholesterol        |                                             | Smoking Status     |                                             | Multivariable      |                                             | Serum Creatinine     |                                             | BP                 |                                             | Foot Exam          |                                             |
|                                                                                                                                                                                                                                                                                                           | OR (95% CI)        | Probability of achieving indicator (95% CI) | OR (95% CI)       | Probability of achieving indicator (95% CI) | OR (95% CI)        | Probability of achieving indicator (95% CI) | OR (95% CI)        | Probability of achieving indicator (95% CI) | OR (95% CI)        | Probability of achieving indicator (95% CI) | OR (95% CI)          | Probability of achieving indicator (95% CI) | OR (95% CI)        | Probability of achieving indicator (95% CI) | OR (95% CI)        | Probability of achieving indicator (95% CI) |
| <b>Year</b>                                                                                                                                                                                                                                                                                               |                    |                                             |                   |                                             |                    |                                             |                    |                                             |                    |                                             |                      |                                             |                    |                                             |                    |                                             |
| 2017/18 (comparator)                                                                                                                                                                                                                                                                                      | 1.0                | 0.71 (-0.4, 10.86)                          | 1.0               | 0.6 (-0.05, 1.26)                           | 1.0                | 0.51 (-7.68, 8.71)                          | 1.0                | 0.82 (-7.83, 9.46)                          | 1.0                | 0.26 (-1.99, 2.51)                          | 1.0                  | 0.04 (-7.15, 7.22)                          | 1.0                | 0.84 (0.77, 0.91)                           | 1.0                | 0.39 (-3.2, 2.99)                           |
| 2018/19                                                                                                                                                                                                                                                                                                   | 1.81 (0.35, 2.42)  | 0.82 (-1.04, 12.24)                         | 1.05 (0.79, 1.31) | 0.66 (0.05, 1.28)                           | 1.19 (0.91, 1.56)  | 0.56 (-8.13, 9.24)                          | 1.37 (1.1, 1.88)   | 0.86 (-8.22, 9.94)                          | 1.36 (1.02, 1.8)   | 0.31 (-2.38, 2.99)                          | 0.16 (0.03, 0.75)    | 0.01 (-1.35, 1.37)                          | 1.52 (1.06, 2.17)  | 0.89 (0.82, 0.96)                           | 1.02 (0.86, 1.46)  | 0.41 (-1.39, 2.21)                          |
| 2019/20                                                                                                                                                                                                                                                                                                   | 2.33 (1.17, 3.19)  | 0.86 (-1.01, 12.72)                         | 1.32 (0.99, 1.77) | 0.7 (0.05, 1.35)                            | 1.61 (1.21, 2.11)  | 0.61 (-8.91, 10.13)                         | 1.28 (0.92, 1.77)  | 0.87 (-8.14, 9.84)                          | 1.23 (0.91, 1.66)  | 0.22 (0.06, 2.38)                           | 0.22 (0.06, 0.86)    | 0.01 (-1.83, 1.85)                          | 2.6 (1.7, 4)       | 0.93 (0.86, 1)                              | 1.31 (1.1, 1.71)   | 0.44 (-1.49, 2.37)                          |
| <b>Prison</b>                                                                                                                                                                                                                                                                                             |                    |                                             |                   |                                             |                    |                                             |                    |                                             |                    |                                             |                      |                                             |                    |                                             |                    |                                             |
| Prison 1                                                                                                                                                                                                                                                                                                  | 2.05 (0.81, 5.19)  | 0.87 (-1.24, 12.98)                         | 1.57 (0.73, 3.41) | 0.78 (0.05, 1.51)                           | 3.14 (1.54, 6.39)  | 0.71 (-10.41, 11.83)                        | 4.13 (1.36, 12.51) | 0.93 (-8.95, 10.82)                         | 1.53 (0.71, 3.28)  | 0.37 (-2.84, 3.57)                          | 12.13 (1, 146.7)     | 0.04 (-8.85, 8.94)                          | 1.48 (0.51, 4.3)   | 0.92 (0.83, 1.02)                           | 4 (1.95, 8.24)     | 0.58 (-1.96, 3.11)                          |
| Prison 2                                                                                                                                                                                                                                                                                                  | 1.11 (0.66, 1.87)  | 0.8 (-10.23, 11.83)                         | 0.82 (0.54, 1.26) | 0.66 (0.05, 1.31)                           | 1.48 (0.96, 2.29)  | 0.57 (-8.35, 9.5)                           | 1.61 (0.96, 2.69)  | 0.81 (-8.14, 9.94)                          | 1.21 (0.7, 2.09)   | 0.32 (-2.52, 2.16)                          | 1.44 (0.76, 2.7)     | 0.92 (0.84, 0.99)                           | 1.44 (0.76, 2.7)   | 0.92 (0.84, 0.99)                           | 2.95 (1.75, 4.98)  | 0.52 (-1.75, 2.78)                          |
| Prison 3                                                                                                                                                                                                                                                                                                  | 1.08 (0.61, 1.91)  | 0.79 (-10.18, 11.76)                        | 0.94 (0.57, 1.55) | 0.7 (0.05, 1.36)                            | 1.27 (0.78, 2.06)  | 0.51 (-7.91, 8.99)                          | 1.15 (0.66, 2)     | 0.81 (-7.69, 9.3)                           | 1.24 (0.69, 2.21)  | 0.21 (-2.55, 2.11)                          | 1.59 (0.89, 28.64)   | 0.01 (-1.31, 1.32)                          | 1.89 (0.84, 2.14)  | 0.9 (0.82, 0.97)                            | 1.48 (0.84, 2.61)  | 0.38 (-1.29, 2.66)                          |
| Prison 4                                                                                                                                                                                                                                                                                                  | 1.27 (0.69, 2.32)  | 0.81 (-10.48, 12.11)                        | 1.08 (0.62, 1.88) | 0.79 (0.05, 1.4)                            | 2.9 (1.69, 4.97)   | 0.7 (-10.2, 11.6)                           | 1.09 (0.6, 1.98)   | 0.8 (-7.62, 9.21)                           | 1.57 (0.85, 2.88)  | 0.37 (-2.88, 3.62)                          | 3.4 (0.26, 44.64)    | 0.01 (-2.73, 2.76)                          | 1.66 (0.54, 1.29)  | 0.84 (0.76, 0.93)                           | 1.23 (0.67, 2.26)  | 0.35 (-1.18, 1.88)                          |
| Prison 5                                                                                                                                                                                                                                                                                                  | 0.59 (0.29, 1.22)  | 0.69 (-8.84, 10.22)                         | 1.05 (0.5, 2.21)  | 0.72 (0.05, 1.4)                            | 1.62 (0.81, 3.21)  | 0.59 (-8.61, 9.79)                          | 0.9 (0.42, 1.92)   | 0.76 (-7.31, 8.84)                          | 1.19 (0.55, 2.6)   | 0.32 (-2.49, 3.13)                          | -                    | 0.7 (0.29, 1.64)                            | 0.85 (0.75, 0.96)  | 1.01 (0.46, 2.2)                            | 0.32 (-1.07, 1.7)  |                                             |
| Prison 6                                                                                                                                                                                                                                                                                                  | 3.78 (1.69, 8.48)  | 0.95 (-1.19, 13.75)                         | 1.07 (0.6, 1.93)  | 0.74 (0.05, 1.4)                            | 2.06 (1.1, 3.64)   | 0.64 (-9.29, 10.56)                         | 2.78 (1.51, 5.89)  | 0.91 (-8.68, 10.49)                         | 2.55 (1.37, 4.74)  | 0.47 (-3.62, 4.56)                          | 18.36 (1.94, 174.02) | 0.06 (-12.68, 12.8)                         | -                  | 0.67 (0.06, 0.88)                           | 6.82 (3.62, 12.85) | 0.88 (-2.29, 3.63)                          |
| Prison 7                                                                                                                                                                                                                                                                                                  | 0.07 (0.00, 1.02)  | -                                           | -                 | 0.04 (0, 0.08)                              | -                  | 0.04 (-0.02, 0.71)                          | -                  | 0.06 (-0.6, 0.73)                           | -                  | -                                           | -                    | -                                           | -                  | 0.07 (0.06, 0.08)                           | -                  | 0.03 (-0.1, 0.16)                           |
| Prison 8                                                                                                                                                                                                                                                                                                  | -                  | 0.05 (-0.69, 0.79)                          | -                 | 0.04 (0, 0.08)                              | -                  | 0.02 (-0.33, 0.38)                          | -                  | 0.06 (-0.61, 0.73)                          | -                  | 0.01 (-6.05, 0.06)                          | -                    | -                                           | -                  | 0.07 (0.06, 0.08)                           | -                  | 0.03 (-0.09, 0.14)                          |
| Prison 9                                                                                                                                                                                                                                                                                                  | 2.86 (1.52, 5.39)  | 0.9 (-1.63, 13.44)                          | 1.39 (0.77, 2.51) | 0.76 (0.06, 1.47)                           | 3.51 (2.02, 6.08)  | 0.73 (-10.67, 12.14)                        | 4.39 (2.23, 8.66)  | 0.94 (-8.98, 10.86)                         | 0.92 (0.51, 1.67)  | 0.28 (-2.16, 2.72)                          | 1.11 (0.05, 26.73)   | 0.008 (-0.92, 0.93)                         | 1.59 (0.7, 3.42)   | 0.92 (0.85, 1)                              | 2.77 (1.36, 4.92)  | 0.5 (-1.71, 2.71)                           |
| Prison 10                                                                                                                                                                                                                                                                                                 | 0.44 (0.27, 0.73)  | 0.65 (-0.89, 9.55)                          | 0.93 (0.58, 0.95) | 0.62 (0.04, 1.2)                            | 1.89 (0.67, 1.65)  | 0.5 (-7.73, 8.27)                           | 1.1 (0.67, 1.82)   | 0.8 (-7.63, 9.23)                           | 0.35 (0.17, 0.7)   | 0.16 (-2.35, 1.57)                          | -                    | 0.004 (-0.83, 0.84)                         | 0.6 (0.38, 1.22)   | 0.85 (0.77, 0.93)                           | 1.3 (0.74, 2.29)   | 0.56 (-1.22, 1.93)                          |
| Prison 11 (comparator)                                                                                                                                                                                                                                                                                    | 1.0                | 0.78 (-10.02, 11.58)                        | 1.0               | 0.7 (0.05, 1.37)                            | 1.0                | 0.49 (-7.22, 8.21)                          | 1.0                | 0.78 (-7.48, 9.05)                          | 1.0                | 0.29 (-2.27, 2.85)                          | 1.0                  | -                                           | 1.0                | 0.89 (0.81, 0.97)                           | 1.0                | 0.31 (-0.66, 1.69)                          |
| Prison 12                                                                                                                                                                                                                                                                                                 | 3.18 (0.33, 30.72) | 0.91 (-11.74, 13.57)                        | 1.61 (0.27, 9.78) | 0.79 (0.02, 1.35)                           | 2.66 (0.53, 13.4)  | 0.68 (-9.98, 11.35)                         | 1.05 (0.17, 6.35)  | 0.79 (-7.56, 9.14)                          | 1.49 (0.28, 7.96)  | 0.36 (-2.82, 3.54)                          | -                    | -                                           | 1.68 (0.15, 18.66) | 0.93 (0.77, 1.09)                           | 3.55 (0.75, 16.77) | 0.5 (-1.89, 1.3)                            |
| Prison 13                                                                                                                                                                                                                                                                                                 | 3.94 (1.72, 9)     | 0.95 (-11.93, 13.79)                        | 1.73 (0.76, 3.94) | 0.79 (0.05, 1.33)                           | 5.53 (2.55, 11.96) | 0.8 (-11.68, 13.28)                         | 3.28 (1.44, 7.44)  | 0.92 (-8.48, 10.64)                         | 7.15 (3.48, 14.82) | 0.48 (-2.34, 6.6)                           | -                    | -                                           | 1.67 (0.59, 4.72)  | 0.95 (0.84, 1.02)                           | 4.68 (2.36, 9.32)  | 0.6 (-2.06, 3.28)                           |
| <b>Prison category</b>                                                                                                                                                                                                                                                                                    |                    |                                             |                   |                                             |                    |                                             |                    |                                             |                    |                                             |                      |                                             |                    |                                             |                    |                                             |
| A (comparator)                                                                                                                                                                                                                                                                                            | -                  | -                                           | -                 | -                                           | -                  | -                                           | -                  | -                                           | -                  | -                                           | -                    | -                                           | -                  | -                                           | -                  | -                                           |
| B                                                                                                                                                                                                                                                                                                         | -                  | -                                           | -                 | -                                           | -                  | -                                           | -                  | -                                           | -                  | -                                           | -                    | -                                           | -                  | -                                           | -                  | -                                           |
| C                                                                                                                                                                                                                                                                                                         | -                  | -                                           | -                 | -                                           | -                  | -                                           | -                  | -                                           | -                  | -                                           | -                    | -                                           | -                  | -                                           | -                  | -                                           |
| Cloud                                                                                                                                                                                                                                                                                                     | -                  | -                                           | -                 | -                                           | -                  | -                                           | -                  | -                                           | -                  | -                                           | -                    | -                                           | -                  | -                                           | -                  | -                                           |
| D                                                                                                                                                                                                                                                                                                         | -                  | -                                           | -                 | -                                           | -                  | -                                           | -                  | -                                           | -                  | -                                           | -                    | -                                           | -                  | -                                           | -                  | -                                           |
| Y08                                                                                                                                                                                                                                                                                                       | -                  | -                                           | -                 | -                                           | -                  | -                                           | -                  | -                                           | -                  | -                                           | -                    | -                                           | -                  | -                                           | -                  | -                                           |
| <b>Gender</b>                                                                                                                                                                                                                                                                                             |                    |                                             |                   |                                             |                    |                                             |                    |                                             |                    |                                             |                      |                                             |                    |                                             |                    |                                             |
| Female (comparator)                                                                                                                                                                                                                                                                                       | -                  | 0.98 (-12.63, 14.6)                         | -                 | 0.97 (0.7, 1.36)                            | -                  | 0.95 (-13.89, 15.8)                         | -                  | 0.99 (-9.46, 11.44)                         | -                  | 0.95 (-7.34, 9.23)                          | -                    | -                                           | -                  | 0.99 (0.92, 1.07)                           | -                  | 0.95 (-3.22, 5.12)                          |
| Male                                                                                                                                                                                                                                                                                                      | -                  | 0.74 (-9.57, 11.06)                         | -                 | 0.63 (0.05, 1.22)                           | -                  | 0.54 (-7.81, 8.88)                          | -                  | 0.78 (-7.45, 9)                             | -                  | 0.28 (-2.16, 2.71)                          | -                    | 0.02 (-3.65, 3.68)                          | -                  | 0.81 (0.75, 0.87)                           | -                  | 0.39 (-1.3, 2.08)                           |
| <b>Age - years</b>                                                                                                                                                                                                                                                                                        |                    |                                             |                   |                                             |                    |                                             |                    |                                             |                    |                                             |                      |                                             |                    |                                             |                    |                                             |
| 10 -<20                                                                                                                                                                                                                                                                                                   | 0.72 (0.06, 9.04)  | 0.75 (-9.68, 11.19)                         | 0.2 (0.01, 3.31)  | 0.42 (-0.25, 1.1)                           | -                  | -                                           | 0.56 (0.05, 6.93)  | 0.77 (-7.37, 8.9)                           | -                  | -                                           | -                    | 0.33 (0.01, 4.32)                           | 0.74 (0.3, 1.19)   | 0.84 (0.05, 13.83)                          | 0.4 (-1.42, 2.22)  |                                             |
| 20 -<30                                                                                                                                                                                                                                                                                                   | 0.93 (0.54, 1.6)   | 0.79 (-10.21, 11.8)                         | 0.68 (0.42, 1.1)  | 0.66 (0.05, 1.27)                           | 0.46 (0.28, 0.76)  | 0.47 (-6.85, 7.79)                          | 1.14 (0.62, 2.11)  | 0.87 (-8.3, 10.04)                          | 0.74 (0.41, 1.33)  | 0.27 (-2.12, 2.67)                          | 0.62 (0.04, 9.11)    | 0.01 (-2.3, 2.33)                           | 1.02 (0.52, 2.01)  | 0.89 (0.81, 0.98)                           | 0.8 (0.47, 1.34)   | 0.39 (-1.31, 2.08)                          |
| 30 -<40                                                                                                                                                                                                                                                                                                   | 0.81 (0.54, 1.22)  | 0.77 (-9.94, 11.49)                         | 0.5 (0.35, 0.73)  | 0.6 (0.04, 1.17)                            | 0.59 (0.41, 0.85)  | 0.52 (-7.33, 8.56)                          | 0.97 (0.62, 1.22)  | 0.83 (-8.12, 9.3)                           | 0.97 (0.7, 0.86)   | 0.23 (-1.8, 2.26)                           | 0.75 (0.12, 4.79)    | 0.01 (-2.72, 2.75)                          | 0.91 (0.54, 1.33)  | 0.89 (0.8, 0.96)                            | 0.85 (0.89, 1.24)  | 0.4 (-1.32, 1.5)                            |
| 40 -<50                                                                                                                                                                                                                                                                                                   | 1.08 (0.72, 1.54)  | 0.82 (-10.48, 12.11)                        | 0.62 (0.45, 0.86) | 0.64 (0.05, 1.24)                           | 0.7 (0.55, 0.95)   | 0.55 (-7.99, 9.09)                          | 0.82 (0.63, 1.24)  | 0.84 (-8.66, 9.74)                          | 0.65 (0.38, 0.77)  | 0.23 (-1.75, 2.2)                           | 0.76 (0.16, 3.73)    | 0.01 (-2.7, 2.8)                            | 0.8 (0.52, 1.24)   | 0.87 (0.8, 0.94)                            | 0.79 (0.58, 1.07)  | 0.38 (-1.3, 2.07)                           |
| 50 -<60 (comparator)                                                                                                                                                                                                                                                                                      | 1.0                | 0.8 (-10.38, 11.95)                         | 1.0               | 0.7 (0.05, 1.39)                            | 1.0                | 0.61 (-8.98, 10.19)                         | 1.0                | 0.85 (-8.16, 9.86)                          | 1.0                | 0.33 (-2.53, 3.18)                          | 1.0                  | 0.02 (-3.5, 3.54)                           | 1.0                | 0.89 (0.82, 0.96)                           | 1.0                | 0.43 (-1.46, 2.32)                          |
| 60 -<70                                                                                                                                                                                                                                                                                                   | 1.0 (0.69, 1.46)   | 0.8 (-10.38, 11.95)                         | 0.76 (0.53, 1.1)  | 0.68 (0.05, 1.31)                           | 0.79 (0.56, 1.11)  | 0.57 (-8.34, 9.48)                          | 0.85 (0.57, 1.27)  | 0.81 (-7.96, 9.62)                          | 0.9 (0.65, 1.25)   | 0.31 (-2.38, 3)                             | 1.51 (0.37, 6.11)    | 0.03 (-4.96, 5.01)                          | 1.01 (0.61, 1.67)  | 0.89 (0.82, 0.97)                           | 0.99 (0.72, 1.35)  | 0.43 (-1.45, 2.3)                           |
| 70 -<80                                                                                                                                                                                                                                                                                                   | 0.76 (0.47, 1.23)  | 0.76 (-9.8, 11.32)                          | 0.85 (0.51, 1.42) | 0.7 (0.05, 1.35)                            | 0.79 (0.49, 1.23)  | 0.57 (-8.28, 9.42)                          | 0.65 (0.39, 1.09)  | 0.79 (-7.99, 11.8)                          | 0.8 (0.52, 1.24)   | 0.29 (-2.24, 2.8)                           | 2.96 (0.48, 18.19)   | 0.04 (-8.48, 8.36)                          | 0.82 (0.43, 1.34)  | 0.87 (0.78, 0.96)                           | 0.91 (0.58, 1.35)  | 0.41 (-1.38, 2.3)                           |
| 80 -<90                                                                                                                                                                                                                                                                                                   | 3.83 (1.08, 13.58) | 0.84 (-12.02, 13.89)                        | 1.17 (0.43, 3.12) | 0.79 (0.04, 1.45)                           | 0.73 (0.32, 1.42)  | 0.55 (-8.1, 9.21)                           | 0.84 (0.54, 2.09)  | 0.81 (0.36, 1.85)                           | 0.59 (-2.85, 2.83) | -                                           | -                    | -                                           | 4.16 (0.54, 31.98) | 0.97 (0.8, 1.06)                            | 1.12 (0.42, 2.4)   | 0.61 (-1.53, 2.44)                          |
| 90 -<100                                                                                                                                                                                                                                                                                                  | -                  | -                                           | -                 | -                                           | -                  | -                                           | 0.48 (0.04, 5.54)  | 0.74 (-7.89, 8.56)                          | 0.54 (0.05, 6.16)  | 0.22 (-1.77, 2.22)                          | -                    | -                                           | -                  | -                                           | 2.04 (0.17, 24.05) | 0.57 (-1.97, 3.1)                           |
| 100 -<110                                                                                                                                                                                                                                                                                                 | -                  | -                                           | -                 | -                                           | -                  | -                                           | -                  | -                                           | -                  | -                                           | -                    | -                                           | -                  | -                                           | -                  | -                                           |
| <b>Length of Stay (months)</b>                                                                                                                                                                                                                                                                            |                    |                                             |                   |                                             |                    |                                             |                    |                                             |                    |                                             |                      |                                             |                    |                                             |                    |                                             |
| <1                                                                                                                                                                                                                                                                                                        | 1.62 (1.04, 2.53)  | 0.88 (-1.37, 13.14)                         | 0.32 (0.22, 0.46) | 0.3 (0.01, 0.6)                             | 0.44 (0.29, 0.66)  | 0.28 (-4.08, 4.64)                          | 0.95 (0.61, 1.48)  | 0.86 (-8.26, 9.99)                          | 0.45 (0.25, 0.82)  | 0.11 (-0.82, 1.03)                          | 1.19 (0.07, 20.67)   | 0.02 (-3.99, 4.03)                          | 1.82 (1.04, 3.18)  | 0.92 (0.84, 1)                              | 0.38 (0.23, 0.63)  | 0.13 (-0.44, 0.7)                           |
| 1-6 (comparator)                                                                                                                                                                                                                                                                                          | 1.0                | 0.83 (-10.68, 12.34)                        | 1.0               | 0.57 (0.04, 1.09)                           | 1.0                | 0.45 (-6.56, 7.46)                          | 1.0                | 0.87 (-8.23, 10.05)                         | 1.0                | 0.1 (-1.51, 1.9)                            | 1.0                  | 0.02 (-3.41, 3.45)                          | 1.0                | 0.86 (0.79, 0.94)                           | 1.0                | 0.27 (-0.99, 1.45)                          |
| 6-12                                                                                                                                                                                                                                                                                                      | 0.73 (0.45, 1.06)  | 0.79 (-10.13, 11.7)                         | 2.47 (1.76, 3.47) | 0.76 (0.06, 1.45)                           | 2.06 (1.49, 2.86)  | 0.61 (-8.91, 10.13)                         | 0.62 (0.41, 0.94)  | 0.81 (-7.73, 9.35)                          | 1.63 (1.08, 2.49)  | 0.27 (-2.11, 2.65)                          | 0.01 (-4.96, 5.01)   | 0.94 (0.98, 1.15)                           | 0.86 (0.78, 0.95)  | 2.63 (1.72, 3.43)                           | 0.46 (-1.54, 2.45) |                                             |
| 12-24                                                                                                                                                                                                                                                                                                     | 0.56 (0.37, 0.85)  | 0.74 (-9.56, 11.05)                         | 2.76 (1.88, 4.05) | 0.7 (0.06, 1.49)                            | 2.46 (1.72, 3.53)  | 0.65 (-8.46, 10.75)                         | 0.73 (0.46, 1.16)  | 0.83 (-7.96, 9.62)                          | 2.29 (1.51, 3.45)  | 0.14 (-2.6, 3.27)                           | 1.47 (0.29, 7.43)    | 0.02 (-4.79, 4.84)                          | 0.85 (0.51, 1.42)  | 0.85 (0.77, 0.92)                           | 3.07 (2.12, 4.46)  | 0.51 (-1.72, 2.74)                          |
| 24+                                                                                                                                                                                                                                                                                                       | 0.58 (0.37, 0.9)   | 0.75 (-9.64, 11.14)                         | 4.91 (3.15, 7.63) | 0.86 (0.06, 1.65)                           | 3.79 (2.55, 5.64)  | 0.73 (-10.69, 12.15)                        | 0.71 (0.43, 1.13)  | 0.82 (-7.89, 9.54)                          | 2.88 (1.87, 4.43)  | 0.38 (-2.97, 3.73)                          | 0.42 (0.05, 3.59)    | 0.01 (-1.33, 1.34)                          | 1.89 (1.05, 3.4)   | 0.92 (0.85, 1)                              | 3.7 (2.5, 5.47)    | 0.55 (-1.87, 2.97)                          |
| <b>Ethnic Group</b>                                                                                                                                                                                                                                                                                       |                    |                                             |                   |                                             |                    |                                             |                    |                                             |                    |                                             |                      |                                             |                    |                                             |                    |                                             |
| White (comparator)                                                                                                                                                                                                                                                                                        | 1.0                | 0.81 (-10.38, 11.99)                        | 1.0               | 0.67 (0.05, 1.29)                           | 1.0                | 0.56 (-8.15, 9.27)                          | 1.0                | 0.85 (-8.11, 9.8)                           | 1.0                | 0.26 (-1.99, 2.51)                          | 1.0                  | 0.02 (-3.18, 3.21)                          | 1.0                | 0.89 (0.82, 0.95)                           | 1.0                | 0.41 (-1.39, 2.21)                          |
| Mixed                                                                                                                                                                                                                                                                                                     | 1.36 (0.45, 4.14)  | 0.85 (-10.9, 12.6)                          | 0.77 (0.33, 1.77) | 0.62 (0.03, 1.22)                           | 1.4 (0.6, 3.26)    | 0.62 (-9.04, 10.28)                         | 1.08 (0.36, 3.24)  | 0.86 (-8.19, 9.59)                          | 1.53 (0.68, 3.44)  | 0.47 (0.68, 3.47)                           | 4.17 (0.68, 25.71)   | 0.05 (-0.48, 10.58)</                       |                    |                                             |                    |                                             |

| <i>The proportion of people with diabetes who have had the following in the preceding 12 months: body mass index, blood pressure, record of smoking status, foot examination, urine albumin: creatinine ratio blood tests for HbA1c, cholesterol and serum creatinine</i> |                        |                                                                     |                |                                                                                                                              |
|---------------------------------------------------------------------------------------------------------------------------------------------------------------------------------------------------------------------------------------------------------------------------|------------------------|---------------------------------------------------------------------|----------------|------------------------------------------------------------------------------------------------------------------------------|
| <b>Group: Diabetes, Asthma &amp; Epilepsy Care</b>                                                                                                                                                                                                                        |                        |                                                                     |                |                                                                                                                              |
| <b>Indicator</b>                                                                                                                                                                                                                                                          | <b>Variable</b>        | <b>Univariate</b>                                                   |                | <b>Multivariable</b>                                                                                                         |
|                                                                                                                                                                                                                                                                           |                        | <b>Odds Ratio (OR) of achieving 5 of the 8 items/tests (95% CI)</b> |                | <b>Odds Ratio (OR) of achieving 5 of the 8 items/tests (95% CI) Probability of achieving 5 of the 8 items/tests (95% CI)</b> |
| <b>Year</b>                                                                                                                                                                                                                                                               |                        |                                                                     |                |                                                                                                                              |
|                                                                                                                                                                                                                                                                           | 2017/18 (comparator)   | 1.0                                                                 | -              | 1.0 0.52 (-0.53, 1.57)                                                                                                       |
|                                                                                                                                                                                                                                                                           | 2018/19                | 1.12                                                                | (0.91, 1.39)   | 1.21 (0.93, 1.58) 0.55 (-0.57, 1.68)                                                                                         |
|                                                                                                                                                                                                                                                                           | 2019/20                | 1.21                                                                | (0.99, 1.49)   | 1.51 (1.15, 1.99) 0.6 (-0.61, 1.8)                                                                                           |
| <b>Prison</b>                                                                                                                                                                                                                                                             |                        |                                                                     |                |                                                                                                                              |
|                                                                                                                                                                                                                                                                           | Prison 1               | 6.65                                                                | (3.92, 11.27)  | 2.82 (1.38, 5.76) 0.71 (-0.73, 2.14)                                                                                         |
|                                                                                                                                                                                                                                                                           | Prison 2               | 3.16                                                                | (2.21, 4.53)   | 1.58 (1.02, 2.44) 0.6 (-0.61, 1.81)                                                                                          |
|                                                                                                                                                                                                                                                                           | Prison 3               | 4.63                                                                | (3.23, 6.64)   | 1.43 (0.88, 2.32) 0.58 (-0.59, 1.75)                                                                                         |
|                                                                                                                                                                                                                                                                           | Prison 4               | 5.13                                                                | (3.37, 7.82)   | 1.38 (0.82, 2.34) 0.57 (-0.59, 1.74)                                                                                         |
|                                                                                                                                                                                                                                                                           | Prison 5               | 4.13                                                                | (2.41, 7.08)   | 1.04 (0.53, 2.06) 0.52 (-0.54, 1.57)                                                                                         |
|                                                                                                                                                                                                                                                                           | Prison 6               | 7.94                                                                | (5.16, 12.21)  | 2.67 (1.5, 4.75) 0.7 (-0.72, 2.11)                                                                                           |
|                                                                                                                                                                                                                                                                           | Prison 7               | 3.63                                                                | (2.12, 6.22)   | - 0.04 (-0.04, 0.12)                                                                                                         |
|                                                                                                                                                                                                                                                                           | Prison 8               | 1.35                                                                | (0.82, 2.2)    | - 0.02 (-0.02, 0.07)                                                                                                         |
|                                                                                                                                                                                                                                                                           | Prison 9               | 15.32                                                               | (10.44, 22.48) | 2.8 (1.64, 4.79) 0.71 (-0.72, 2.13)                                                                                          |
|                                                                                                                                                                                                                                                                           | Prison 10              | 1.49                                                                | (1.03, 2.16)   | 0.78 (0.5, 1.24) 0.46 (-0.47, 1.39)                                                                                          |
|                                                                                                                                                                                                                                                                           | Prison 11 (comparator) | 1.0                                                                 | -              | 1.0 0.51 (-0.52, 1.54)                                                                                                       |
|                                                                                                                                                                                                                                                                           | Prison 12              | 5.95                                                                | (1.69, 20.93)  | 3.04 (0.62, 15) 0.72 (-0.76, 2.2)                                                                                            |
|                                                                                                                                                                                                                                                                           | Prison 13              | 23.55                                                               | (13.14, 42.22) | 4.46 (2.13, 9.31) 0.78 (-0.8, 2.36)                                                                                          |
| <b>Prison category</b>                                                                                                                                                                                                                                                    |                        |                                                                     |                |                                                                                                                              |
|                                                                                                                                                                                                                                                                           | A (comparator)         | 1.0                                                                 | -              | - -                                                                                                                          |
|                                                                                                                                                                                                                                                                           | B                      | 0.10                                                                | (0.07, 0.13)   | - -                                                                                                                          |
|                                                                                                                                                                                                                                                                           | C                      | 0.30                                                                | (0.22, 0.4)    | - -                                                                                                                          |
|                                                                                                                                                                                                                                                                           | Closed                 | 0.12                                                                | (0.08, 0.18)   | - -                                                                                                                          |
|                                                                                                                                                                                                                                                                           | D                      | 0.37                                                                | (0.26, 0.54)   | - -                                                                                                                          |
|                                                                                                                                                                                                                                                                           | YOI                    | 0.35                                                                | (0.1, 1.21)    | - -                                                                                                                          |
| <b>Gender</b>                                                                                                                                                                                                                                                             |                        |                                                                     |                |                                                                                                                              |
|                                                                                                                                                                                                                                                                           | Female (comparator)    | 1.0                                                                 | -              | - -                                                                                                                          |
|                                                                                                                                                                                                                                                                           | Male                   | 2.15                                                                | (1.52, 3.06)   | - -                                                                                                                          |
| <b>Age - years</b>                                                                                                                                                                                                                                                        |                        |                                                                     |                |                                                                                                                              |
|                                                                                                                                                                                                                                                                           | 10 - <20               | 0.77                                                                | (0.07, 8.58)   | 0.66 (0.04, 11.11) 0.42 (-0.58, 1.42)                                                                                        |
|                                                                                                                                                                                                                                                                           | 20 - <30               | 0.75                                                                | (0.5, 1.14)    | 0.92 (0.54, 1.57) 0.48 (-0.5, 1.47)                                                                                          |
|                                                                                                                                                                                                                                                                           | 30 - <40 (comparator)  | 1.0                                                                 | -              | 1.0 0.5 (-0.51, 1.51)                                                                                                        |
|                                                                                                                                                                                                                                                                           | 40 - <50               | 1.24                                                                | (0.92, 1.67)   | 1.19 (0.82, 1.73) 0.53 (-0.55, 1.61)                                                                                         |
|                                                                                                                                                                                                                                                                           | 50 - <60               | 2.14                                                                | (1.6, 2.84)    | 1.76 (1.23, 2.54) 0.61 (-0.62, 1.83)                                                                                         |
|                                                                                                                                                                                                                                                                           | 60 - <70               | 2.45                                                                | (1.79, 3.34)   | 1.39 (0.93, 2.09) 0.56 (-0.58, 1.7)                                                                                          |
|                                                                                                                                                                                                                                                                           | 70 - <80               | 2.31                                                                | (1.55, 3.45)   | 1.26 (0.76, 2.07) 0.54 (-0.56, 1.65)                                                                                         |
|                                                                                                                                                                                                                                                                           | 80 - <90               | 3.06                                                                | (1.48, 6.35)   | 2.02 (0.85, 4.79) 0.63 (-0.65, 1.92)                                                                                         |
|                                                                                                                                                                                                                                                                           | 90 - <100              | -                                                                   | -              | - -                                                                                                                          |
|                                                                                                                                                                                                                                                                           | 100 - <110             | -                                                                   | -              | - -                                                                                                                          |
| <b>Length of Stay (months)</b>                                                                                                                                                                                                                                            |                        |                                                                     |                |                                                                                                                              |
|                                                                                                                                                                                                                                                                           | <1                     | 0.33                                                                | (0.23, 0.46)   | 0.38 (0.25, 0.58) 0.25 (-0.26, 0.75)                                                                                         |
|                                                                                                                                                                                                                                                                           | 1-<6 (comparator)      | 1.0                                                                 | -              | 1.0 0.44 (-0.45, 1.34)                                                                                                       |
|                                                                                                                                                                                                                                                                           | 6-<12                  | 2.87                                                                | (2.18, 3.77)   | 2.29 (1.65, 3.19) 0.63 (-0.64, 1.9)                                                                                          |
|                                                                                                                                                                                                                                                                           | 12-<24                 | 3.98                                                                | (2.98, 5.31)   | 2.39 (1.67, 3.42) 0.64 (-0.65, 1.93)                                                                                         |
|                                                                                                                                                                                                                                                                           | 24+                    | 7.26                                                                | (5.55, 9.49)   | 3.41 (2.32, 5.03) 0.71 (-0.73, 2.14)                                                                                         |
| <b>Ethnic Group</b>                                                                                                                                                                                                                                                       |                        |                                                                     |                |                                                                                                                              |
|                                                                                                                                                                                                                                                                           | White (comparator)     | 1.0                                                                 | -              | 1.0 0.55 (-0.57, 1.68)                                                                                                       |
|                                                                                                                                                                                                                                                                           | Mixed                  | 1.08                                                                | (0.55, 2.14)   | 0.8 (0.36, 1.81) 0.51 (-0.54, 1.56)                                                                                          |
|                                                                                                                                                                                                                                                                           | Asian or Asian British | 1.08                                                                | (0.73, 1.6)    | 1.41 (0.89, 2.24) 0.62 (-0.63, 1.87)                                                                                         |
|                                                                                                                                                                                                                                                                           | Black or Black British | 1.00                                                                | (0.57, 1.77)   | 0.93 (0.47, 1.82) 0.54 (-0.56, 1.64)                                                                                         |
|                                                                                                                                                                                                                                                                           | Chinese and Other      | 0.93                                                                | (0.38, 2.31)   | 0.83 (0.27, 2.52) 0.52 (-0.55, 1.59)                                                                                         |
|                                                                                                                                                                                                                                                                           | Unclassified           | 1.00                                                                | (0.49, 2.05)   | 0.43 (0.18, 0.99) 0.39 (-0.42, 1.21)                                                                                         |

| Indicator                      | <i>The percentage of patients with diabetes, on the register, without moderate or severe frailty, in whom the last HbA1c is 58 mmol/mol or less in the preceding 12 months</i> |                |      |               |                                    |                         |  |
|--------------------------------|--------------------------------------------------------------------------------------------------------------------------------------------------------------------------------|----------------|------|---------------|------------------------------------|-------------------------|--|
|                                | Group: Diabetes, Asthma & Epilepsy Care                                                                                                                                        |                |      |               |                                    |                         |  |
|                                | Univariate                                                                                                                                                                     |                |      | Multivariable |                                    |                         |  |
| Variable                       | Odds Ratio (OR) of achieving indicator                                                                                                                                         | (95% CI) of OR | OR   | (95% CI)      | Probability of achieving indicator | (95% CI) of probability |  |
| <b>Year</b>                    |                                                                                                                                                                                |                |      |               |                                    |                         |  |
| 2017/18 (comparator)           | 1.0                                                                                                                                                                            | -              | 1.0  | -             | 0.35                               | -                       |  |
| 2018/19                        | 1.03                                                                                                                                                                           | (0.83, 1.29)   | 1.02 | (0.79, 1.33)  | 0.36                               | -                       |  |
| 2019/20                        | 0.99                                                                                                                                                                           | (0.79, 1.23)   | 1.15 | (0.88, 1.51)  | 0.38                               | -                       |  |
| <b>Prison</b>                  |                                                                                                                                                                                |                |      |               |                                    |                         |  |
| Prison 1                       | 3.99                                                                                                                                                                           | (2.36, 6.72)   | 1.95 | (0.96, 3.97)  | 0.57                               | -                       |  |
| Prison 2                       | 2.12                                                                                                                                                                           | (1.43, 3.15)   | 0.92 | (0.56, 1.51)  | 0.42                               | -                       |  |
| Prison 3                       | 3.06                                                                                                                                                                           | (2.07, 4.52)   | 0.80 | (0.47, 1.37)  | 0.40                               | -                       |  |
| Prison 4                       | 3.06                                                                                                                                                                           | (1.96, 4.76)   | 0.91 | (0.52, 1.61)  | 0.42                               | -                       |  |
| Prison 5                       | 3.23                                                                                                                                                                           | (1.85, 5.66)   | 1.02 | (0.5, 2.06)   | 0.44                               | -                       |  |
| Prison 6                       | 6.09                                                                                                                                                                           | (3.96, 9.35)   | 2.13 | (1.18, 3.85)  | 0.58                               | -                       |  |
| Prison 7                       | 3.23                                                                                                                                                                           | (1.85, 5.66)   | -    | -             | 0.03                               | -                       |  |
| Prison 8                       | 1.76                                                                                                                                                                           | (1.05, 2.94)   | -    | -             | 0.02                               | -                       |  |
| Prison 9                       | 4.61                                                                                                                                                                           | (3.21, 6.61)   | 0.84 | (0.49, 1.45)  | 0.41                               | -                       |  |
| Prison 10                      | 1.25                                                                                                                                                                           | (0.82, 1.9)    | 0.63 | (0.37, 1.07)  | 0.35                               | -                       |  |
| Prison 11 (comparator)         | 1.0                                                                                                                                                                            | -              | 1.0  | -             | 0.44                               | -                       |  |
| Prison 12                      | 2.71                                                                                                                                                                           | (0.77, 9.58)   | 2.39 | (0.49, 11.59) | 0.60                               | -                       |  |
| Prison 13                      | 2.26                                                                                                                                                                           | (1.41, 3.61)   | 0.34 | (0.17, 0.65)  | 0.26                               | -                       |  |
| <b>Prison category</b>         |                                                                                                                                                                                |                |      |               |                                    |                         |  |
| A (comparator)                 | 1.0                                                                                                                                                                            | -              |      |               |                                    |                         |  |
| B                              | 0.36                                                                                                                                                                           | (0.28, 0.47)   |      |               |                                    |                         |  |
| C                              | 0.85                                                                                                                                                                           | (0.65, 1.1)    |      |               |                                    |                         |  |
| Closed                         | 0.60                                                                                                                                                                           | (0.41, 0.86)   |      |               |                                    |                         |  |
| D                              | 1.32                                                                                                                                                                           | (0.96, 1.82)   |      |               |                                    |                         |  |
| YOI                            | 0.72                                                                                                                                                                           | (0.21, 2.48)   |      |               |                                    |                         |  |
| <b>Gender</b>                  |                                                                                                                                                                                |                |      |               |                                    |                         |  |
| Female (comparator)            | 1.0                                                                                                                                                                            | -              | 1.0  | -             | 0.95                               | -                       |  |
| Male                           | 1.21                                                                                                                                                                           | (0.84, 1.74)   | -    | -             | 0.34                               | -                       |  |
| <b>Age - years</b>             |                                                                                                                                                                                |                |      |               |                                    |                         |  |
| 10 - <20                       | 0.81                                                                                                                                                                           | (0.07, 8.96)   | 0.75 | (0.04, 13.04) | 0.32                               | -                       |  |
| 20 - <30                       | 0.29                                                                                                                                                                           | (0.18, 0.46)   | 0.31 | (0.16, 0.58)  | 0.18                               | -                       |  |
| 30 - <40                       | 0.45                                                                                                                                                                           | (0.33, 0.62)   | 0.52 | (0.35, 0.76)  | 0.26                               | -                       |  |
| 40 - <50                       | 0.73                                                                                                                                                                           | (0.56, 0.93)   | 0.84 | (0.62, 1.14)  | 0.34                               | -                       |  |
| 50 - <60 (comparator)          | 1.0                                                                                                                                                                            | -              | 1.0  | -             | 0.38                               | -                       |  |
| 60 - <70                       | 1.20                                                                                                                                                                           | (0.93, 1.54)   | 1.25 | (0.92, 1.69)  | 0.43                               | -                       |  |
| 70 - <80                       | 1.36                                                                                                                                                                           | (0.95, 1.95)   | 1.33 | (0.88, 2)     | 0.44                               | -                       |  |
| 80 - <90                       | 1.97                                                                                                                                                                           | (0.91, 4.29)   | 2.01 | (0.83, 4.86)  | 0.53                               | -                       |  |
| 90 - <100                      | -                                                                                                                                                                              | -              | -    | -             | -                                  | -                       |  |
| 100 - <110                     | -                                                                                                                                                                              | -              | -    | -             | -                                  | -                       |  |
| <b>Length of Stay (months)</b> |                                                                                                                                                                                |                |      |               |                                    |                         |  |
| <1                             | 0.18                                                                                                                                                                           | (0.11, 0.3)    | 0.21 | (0.12, 0.38)  | 0.08                               | -                       |  |
| 1-<6 (comparator)              | 1.0                                                                                                                                                                            | -              | 1.0  | -             | 0.27                               | -                       |  |
| 6-<12                          | 2.71                                                                                                                                                                           | (2.05, 3.6)    | 2.58 | (1.83, 3.64)  | 0.47                               | -                       |  |
| 12-<24                         | 2.69                                                                                                                                                                           | (2.01, 3.61)   | 2.07 | (1.42, 3.01)  | 0.42                               | -                       |  |
| 24+                            | 2.68                                                                                                                                                                           | (2.09, 3.45)   | 2.47 | (1.68, 3.65)  | 0.46                               | -                       |  |
| <b>Ethnic Group</b>            |                                                                                                                                                                                |                |      |               |                                    |                         |  |
| White (comparator)             | 1.0                                                                                                                                                                            | -              | 1.0  | -             | 0.35                               | -                       |  |
| Mixed                          | 1.22                                                                                                                                                                           | (0.62, 2.42)   | 1.14 | (0.52, 2.51)  | 0.38                               | -                       |  |
| Asian or Asian British         | 1.23                                                                                                                                                                           | (0.82, 1.83)   | 1.39 | (0.87, 2.21)  | 0.42                               | -                       |  |
| Black or Black British         | 2.52                                                                                                                                                                           | (1.42, 4.46)   | 3.08 | (1.6, 5.91)   | 0.58                               | -                       |  |
| Chinese and Other              | 0.35                                                                                                                                                                           | (0.1, 1.19)    | 0.49 | (0.14, 1.76)  | 0.23                               | -                       |  |
| Unclassified                   | 0.92                                                                                                                                                                           | (0.43, 1.98)   | 0.84 | (0.36, 1.97)  | 0.32                               | -                       |  |

| Indicator                              | <i>The percentage of patients with asthma, on the register, who have had an asthma review in the preceding 12 months that includes an assessment of asthma control using the 3 RCP questions</i> |                |                |               |                                    |                         |               |
|----------------------------------------|--------------------------------------------------------------------------------------------------------------------------------------------------------------------------------------------------|----------------|----------------|---------------|------------------------------------|-------------------------|---------------|
|                                        | Group: Diabetes, Asthma & Epilepsy Care                                                                                                                                                          |                |                |               |                                    |                         |               |
|                                        | Variable                                                                                                                                                                                         | Univariate     |                | Multivariable |                                    |                         |               |
| Odds Ratio (OR) of achieving indicator |                                                                                                                                                                                                  | (95% CI) of OR | OR             | (95% CI)      | Probability of achieving indicator | (95% CI) of probability |               |
| <b>Year</b>                            |                                                                                                                                                                                                  |                |                |               |                                    |                         |               |
|                                        | 2017/18 (comparator)                                                                                                                                                                             | 1.0            | -              | 1.0           | -                                  | 0.18                    | (-1.1, 1.47)  |
|                                        | 2018/19                                                                                                                                                                                          | 0.26           | (0.22, 0.31)   | 0.24          | (0.2, 0.29)                        | 0.06                    | (-0.37, 0.49) |
|                                        | 2019/20                                                                                                                                                                                          | 0.14           | (0.11, 0.17)   | 0.14          | (0.11, 0.17)                       | 0.04                    | (-0.23, 0.3)  |
| <b>Prison</b>                          |                                                                                                                                                                                                  |                |                |               |                                    |                         |               |
|                                        | Prison 1                                                                                                                                                                                         | 4.82           | (3.14, 7.4)    | 2.72          | (1.68, 4.39)                       | 0.11                    | (-0.64, 0.86) |
|                                        | Prison 2                                                                                                                                                                                         | 4.23           | (2.84, 6.29)   | 2.38          | (1.56, 3.62)                       | 0.10                    | (-0.58, 0.77) |
|                                        | Prison 3                                                                                                                                                                                         | 1.87           | (1.17, 2.99)   | 0.77          | (0.46, 1.27)                       | 0.04                    | (-0.22, 0.3)  |
|                                        | Prison 4                                                                                                                                                                                         | 7.48           | (5.03, 11.14)  | 2.25          | (1.45, 3.47)                       | 0.09                    | (-0.55, 0.74) |
|                                        | Prison 5                                                                                                                                                                                         | 1.80           | (0.81, 3.98)   | 0.68          | (0.3, 1.56)                        | 0.03                    | (-0.2, 0.27)  |
|                                        | Prison 6                                                                                                                                                                                         | 4.64           | (3.04, 7.09)   | 2.04          | (1.29, 3.24)                       | 0.09                    | (-0.51, 0.69) |
|                                        | Prison 7                                                                                                                                                                                         | 8.26           | (5.43, 12.57)  | 7.62          | (0.76, 76.72)                      | 0.22                    | (-1.34, 1.77) |
|                                        | Prison 8                                                                                                                                                                                         | 3.78           | (2.45, 5.84)   | 4.54          | (0.45, 46)                         | 0.16                    | (-0.96, 1.27) |
|                                        | Prison 9                                                                                                                                                                                         | 18.58          | (12.22, 28.25) | 3.59          | (2.23, 5.78)                       | 0.13                    | (-0.79, 1.05) |
|                                        | Prison 10                                                                                                                                                                                        | 1.26           | (0.8, 2.01)    | 0.95          | (0.59, 1.53)                       | 0.05                    | (-0.27, 0.36) |
|                                        | Prison 11 (comparator)                                                                                                                                                                           | 1.0            | -              | 1.0           | -                                  | 0.05                    | (-0.28, 0.38) |
|                                        | Prison 12                                                                                                                                                                                        | 6.74           | (4.3, 10.57)   | 3.27          | (1.93, 5.53)                       | 0.12                    | (-0.74, 0.98) |
|                                        | Prison 13                                                                                                                                                                                        | 28.34          | (18.24, 44.04) | 5.01          | (3, 8.37)                          | 0.17                    | (-1, 1.33)    |
| <b>Prison category</b>                 |                                                                                                                                                                                                  |                |                |               |                                    |                         |               |
|                                        | A (comparator)                                                                                                                                                                                   | 1.0            | -              |               |                                    |                         |               |
|                                        | B                                                                                                                                                                                                | 0.09           | (0.07, 0.12)   |               |                                    |                         |               |
|                                        | C                                                                                                                                                                                                | 0.20           | (0.16, 0.25)   |               |                                    |                         |               |
|                                        | Closed                                                                                                                                                                                           | 0.25           | (0.19, 0.32)   |               |                                    |                         |               |
|                                        | D                                                                                                                                                                                                | 0.18           | (0.14, 0.24)   |               |                                    |                         |               |
|                                        | YOI                                                                                                                                                                                              | 0.31           | (0.22, 0.43)   |               |                                    |                         |               |
| <b>Gender</b>                          |                                                                                                                                                                                                  |                |                |               |                                    |                         |               |
|                                        | Female (comparator)                                                                                                                                                                              | 1.0            | -              | 1.0           | -                                  | 0.06                    | (-0.34, 0.46) |
|                                        | Male                                                                                                                                                                                             | 0.79           | (0.65, 0.96)   | 2.2           | (0.23, 21.47)                      | 0.10                    | (-0.61, 0.82) |
| <b>Age - years</b>                     |                                                                                                                                                                                                  |                |                |               |                                    |                         |               |
|                                        | 10 - <20                                                                                                                                                                                         | 1.51           | (0.94, 2.45)   | 1.05          | (0.57, 1.93)                       | 0.09                    | (-0.54, 0.72) |
|                                        | 20 - <30                                                                                                                                                                                         | 0.75           | (0.62, 0.91)   | 0.79          | (0.63, 1)                          | 0.07                    | (-0.43, 0.58) |
|                                        | 30 - <40                                                                                                                                                                                         | 1.0            | -              | 1.0           | -                                  | 0.09                    | (-0.52, 0.69) |
|                                        | 40 - <50                                                                                                                                                                                         | 1.31           | (1.08, 1.58)   | 1.13          | (0.91, 1.39)                       | 0.10                    | (-0.57, 0.76) |
|                                        | 50 - <60 (comparator)                                                                                                                                                                            | 1.86           | (1.49, 2.34)   | 1.48          | (1.15, 1.9)                        | 0.12                    | (-0.7, 0.93)  |
|                                        | 60 - <70                                                                                                                                                                                         | 3.67           | (2.68, 5.04)   | 2.26          | (1.57, 3.25)                       | 0.16                    | (-0.93, 1.25) |
|                                        | 70 - <80                                                                                                                                                                                         | 4.81           | (2.84, 8.17)   | 4.11          | (2.26, 7.46)                       | 0.23                    | (-1.36, 1.81) |
|                                        | 80 - <90                                                                                                                                                                                         | 2.30           | (0.5, 10.44)   | 1.97          | (0.41, 9.42)                       | 0.14                    | (-0.86, 1.15) |
|                                        | 90 - <100                                                                                                                                                                                        | -              | -              | -             | -                                  |                         |               |
|                                        | 100 - <110                                                                                                                                                                                       | -              | -              | -             | -                                  |                         |               |
| <b>Length of Stay (months)</b>         |                                                                                                                                                                                                  |                |                |               |                                    |                         |               |
|                                        | <1                                                                                                                                                                                               | 0.35           | (0.24, 0.51)   | 0.36          | (0.24, 0.53)                       | 0.02                    | (-0.14, 0.18) |
|                                        | 1-<6 (comparator)                                                                                                                                                                                | 1.0            | -              | 1.0           | -                                  | 0.06                    | (-0.35, 0.47) |
|                                        | 6-<12                                                                                                                                                                                            | 2.06           | (1.65, 2.57)   | 1.78          | (1.4, 2.25)                        | 0.10                    | (-0.57, 0.76) |
|                                        | 12-<24                                                                                                                                                                                           | 3.52           | (2.85, 4.35)   | 2.58          | (2.04, 3.27)                       | 0.13                    | (-0.77, 1.02) |
|                                        | 24+                                                                                                                                                                                              | 8.30           | (6.78, 10.17)  | 4.06          | (3.14, 5.24)                       | 0.18                    | (-1.07, 1.42) |
| <b>Ethnic Group</b>                    |                                                                                                                                                                                                  |                |                |               |                                    |                         |               |
|                                        | White (comparator)                                                                                                                                                                               | 1.0            | -              | 1.0           | -                                  | 0.09                    | (-0.54, 0.72) |
|                                        | Mixed                                                                                                                                                                                            | 1.50           | (1.01, 2.23)   | 1.05          | (0.68, 1.62)                       | 0.09                    | (-0.56, 0.75) |
|                                        | Asian or Asian British                                                                                                                                                                           | 1.55           | (1.12, 2.15)   | 1.49          | (1.04, 2.14)                       | 0.12                    | (-0.73, 0.97) |
|                                        | Black or Black British                                                                                                                                                                           | 0.98           | (0.58, 1.63)   | 0.72          | (0.41, 1.24)                       | 0.07                    | (-0.42, 0.56) |
|                                        | Chinese and Other                                                                                                                                                                                | 2.85           | (1.43, 5.69)   | 2.21          | (1.03, 4.75)                       | 0.16                    | (-0.95, 1.26) |
|                                        | Unclassified                                                                                                                                                                                     | 2.39           | (1.57, 3.65)   | 1.37          | (0.82, 2.29)                       | 0.11                    | (-0.68, 0.91) |

| Indicator                              | <i>The percentage of patients with a stroke shown to be non-haemorrhagic, or a history of TIA, who have a record in the preceding 12 months that an anti-platelet agent, or an anti-coagulant is being taken</i> |                |                |               |                                    |                         |               |
|----------------------------------------|------------------------------------------------------------------------------------------------------------------------------------------------------------------------------------------------------------------|----------------|----------------|---------------|------------------------------------|-------------------------|---------------|
|                                        | Group: Cardiovascular Disease                                                                                                                                                                                    |                |                |               |                                    |                         |               |
|                                        | Variable                                                                                                                                                                                                         | Univariate     |                | Multivariable |                                    |                         |               |
| Odds Ratio (OR) of achieving indicator |                                                                                                                                                                                                                  | (95% CI) of OR | OR             | (95% CI)      | Probability of achieving indicator | (95% CI) of probability |               |
| <b>Year</b>                            |                                                                                                                                                                                                                  |                |                |               |                                    |                         |               |
|                                        | 2017/18 (comparator)                                                                                                                                                                                             | 1.0            | -              | 1.0           | -                                  | 0.79                    | (0.69, 0.89)  |
|                                        | 2018/19                                                                                                                                                                                                          | 0.90           | (0.44, 1.82)   | 1.23          | (0.34, 4.43)                       | 0.82                    | (0.73, 0.9)   |
|                                        | 2019/20                                                                                                                                                                                                          | 0.60           | (0.31, 1.17)   | 0.84          | (0.22, 3.16)                       | 0.77                    | (0.67, 0.88)  |
| <b>Prison</b>                          |                                                                                                                                                                                                                  |                |                |               |                                    |                         |               |
|                                        | Prison 1                                                                                                                                                                                                         | 0.43           | (0.052, 3.55)  | 0.51          | (0.01, 19.5)                       |                         |               |
|                                        | Prison 2                                                                                                                                                                                                         | 0.28           | (0.04, 2)      | 0.08          | (0, 1.33)                          |                         |               |
|                                        | Prison 3                                                                                                                                                                                                         | 0.23           | (0.043, 1.17)  | 0.04          | (0, 0.51)                          |                         |               |
|                                        | Prison 4                                                                                                                                                                                                         | 0.42           | (0.081, 2.19)  | 0.11          | (0.01, 1.3)                        |                         |               |
|                                        | Prison 5                                                                                                                                                                                                         | -              | -              | -             | -                                  |                         |               |
|                                        | Prison 6                                                                                                                                                                                                         | 0.89           | (0.114, 7)     | 0.03          | (0, 0.97)                          |                         |               |
|                                        | Prison 7                                                                                                                                                                                                         | 0.03           | (0.002, 0.47)  | -             | -                                  |                         |               |
|                                        | Prison 8                                                                                                                                                                                                         | 0.28           | (0.032, 2.42)  | 0.53          | (0.02, 12.82)                      |                         |               |
|                                        | Prison 9                                                                                                                                                                                                         | -              | -              | -             | -                                  |                         |               |
|                                        | Prison 10                                                                                                                                                                                                        | 0.73           | (0.057, 9.23)  | 1.29          | (0.06, 28.6)                       |                         |               |
|                                        | Prison 11 (comparator)                                                                                                                                                                                           | 1.0            | -              | 1.0           | -                                  |                         |               |
|                                        | Prison 12                                                                                                                                                                                                        | -              | -              | -             | -                                  |                         |               |
|                                        | Prison 13                                                                                                                                                                                                        | 0.31           | (0.056, 1.73)  | 0.20          | (0.01, 3.23)                       |                         |               |
| <b>Prison category</b>                 |                                                                                                                                                                                                                  |                |                |               |                                    |                         |               |
|                                        | A (comparator)                                                                                                                                                                                                   | 1.0            | -              |               |                                    |                         |               |
|                                        | B                                                                                                                                                                                                                | 14.65          | (5.32, 40.38)  |               |                                    |                         |               |
|                                        | C                                                                                                                                                                                                                | 8.23           | (3.94, 17.2)   |               |                                    |                         |               |
|                                        | Closed                                                                                                                                                                                                           | 3.29           | (0.93, 11.66)  |               |                                    |                         |               |
|                                        | D                                                                                                                                                                                                                | 23.96          | (5.08, 113.02) |               |                                    |                         |               |
|                                        | YOI                                                                                                                                                                                                              | -              | -              |               |                                    |                         |               |
| <b>Gender</b>                          |                                                                                                                                                                                                                  |                |                |               |                                    |                         |               |
|                                        | Female (comparator)                                                                                                                                                                                              | 1.0            | -              | -             | -                                  |                         |               |
|                                        | Male                                                                                                                                                                                                             | 1.35           | (0.37, 4.96)   | -             | -                                  |                         |               |
| <b>Age - years</b>                     |                                                                                                                                                                                                                  |                |                |               |                                    |                         |               |
|                                        | 10 - <20                                                                                                                                                                                                         | -              | -              | -             | -                                  |                         |               |
|                                        | 20 - <30                                                                                                                                                                                                         | -              | -              | -             | -                                  |                         |               |
|                                        | 30 - <40                                                                                                                                                                                                         | 0.16           | (0.02, 1.71)   | -             | -                                  | 0.01                    | (-0.01, 0.04) |
|                                        | 40 - <50                                                                                                                                                                                                         | 0.57           | (0.22, 1.47)   | 0.54          | (0.09, 3.26)                       | 0.81                    | (0.64, 0.99)  |
|                                        | 50 - <60                                                                                                                                                                                                         | 0.45           | (0.22, 0.91)   | 0.14          | (0.04, 0.53)                       | 0.61                    | (0.47, 0.75)  |
|                                        | 60 - <70 (comparator)                                                                                                                                                                                            | 1.0            | -              | 1.0           | -                                  | 0.88                    | (0.8, 0.96)   |
|                                        | 70 - <80                                                                                                                                                                                                         | 0.99           | (0.44, 2.24)   | 2.72          | (0.26, 28.05)                      | 0.94                    | (0.84, 1.04)  |
|                                        | 80 - <90                                                                                                                                                                                                         | 1.60           | (0.41, 6.3)    | 0.58          | (0.08, 4.22)                       | 0.82                    | (0.62, 1.02)  |
|                                        | 90 - <100                                                                                                                                                                                                        | -              | -              | -             | -                                  |                         |               |
|                                        | 100 - <110                                                                                                                                                                                                       | -              | -              | -             | -                                  |                         |               |
| <b>Length of Stay (months)</b>         |                                                                                                                                                                                                                  |                |                |               |                                    |                         |               |
|                                        | <1                                                                                                                                                                                                               | 0.82           | (0.21, 3.23)   | 0.21          | (0.02, 2.02)                       | 0.46                    | (0.09, 0.84)  |
|                                        | 1-<6 (comparator)                                                                                                                                                                                                | 1.0            | -              | 1.0           | -                                  | 0.71                    | (0.52, 0.91)  |
|                                        | 6-<12                                                                                                                                                                                                            | 4.97           | (1.01, 24.57)  | -             | -                                  |                         |               |
|                                        | 12-<24                                                                                                                                                                                                           | 1.71           | (0.61, 4.8)    | 32.66         | (1.39, 769.61)                     | 0.96                    | (0.92, 1.01)  |
|                                        | 24+                                                                                                                                                                                                              | 0.42           | (0.19, 0.92)   | 1.40          | (0.3, 6.6)                         | 0.76                    | (0.67, 0.85)  |
| <b>Ethnic Group</b>                    |                                                                                                                                                                                                                  |                |                |               |                                    |                         |               |
|                                        | White (comparator)                                                                                                                                                                                               | 1.0            | -              | 1.0           | -                                  | 0.80                    | (0.75, 0.86)  |
|                                        | Mixed                                                                                                                                                                                                            | -              | -              | -             | -                                  |                         |               |
|                                        | Asian or Asian British                                                                                                                                                                                           | 1.84           | (0.19, 18.34)  | 1,281,697.43  | -                                  | 0.98                    | (0.96, 1)     |
|                                        | Black or Black British                                                                                                                                                                                           | -              | -              | -             | -                                  |                         |               |
|                                        | Chinese and Other                                                                                                                                                                                                | -              | -              | -             | -                                  |                         |               |
|                                        | Unclassified                                                                                                                                                                                                     | 0.15           | (0.02, 1.54)   | 0.04          | (0.002, 0.59)                      | 0.31                    | (-0.07, 0.7)  |

*In those patients with atrial fibrillation with a record of a CHA2DS2-VASc score of 2 or more, the percentage of patients who are currently treated with anticoagulation drug therapy.*

| Indicator                      | Group: Cardiovascular Disease |                                        |                |    |          |                                    |                         |
|--------------------------------|-------------------------------|----------------------------------------|----------------|----|----------|------------------------------------|-------------------------|
|                                | Variable                      | Odds Ratio (OR) of achieving indicator | (95% CI) of OR | OR | (95% CI) | Probability of achieving indicator | (95% CI) of probability |
| <b>Year</b>                    |                               |                                        |                |    |          |                                    |                         |
|                                | 2017/18 (comparator)          | 1.0                                    | -              | -  | -        | -                                  | -                       |
|                                | 2018/19                       | 0.60                                   | (0.2, 1.78)    | -  | -        | -                                  | -                       |
|                                | 2019/20                       | 0.88                                   | (0.29, 2.72)   | -  | -        | -                                  | -                       |
| <b>Prison</b>                  |                               |                                        |                |    |          |                                    |                         |
|                                | Prison 1                      | -                                      | -              | -  | -        | -                                  | -                       |
|                                | Prison 2                      | 1.36                                   | (0.22, 8.52)   | -  | -        | -                                  | -                       |
|                                | Prison 3                      | -                                      | -              | -  | -        | -                                  | -                       |
|                                | Prison 4                      | 1.95                                   | (0.35, 10.95)  | -  | -        | -                                  | -                       |
|                                | Prison 5                      | 2.71                                   | (0.21, 34.5)   | -  | -        | -                                  | -                       |
|                                | Prison 6                      | -                                      | -              | -  | -        | -                                  | -                       |
|                                | Prison 7                      | -                                      | -              | -  | -        | -                                  | -                       |
|                                | Prison 8                      | 0.66                                   | (0.07, 6.38)   | -  | -        | -                                  | -                       |
|                                | Prison 9                      | 1.11                                   | (0.21, 5.77)   | -  | -        | -                                  | -                       |
|                                | Prison 10                     | -                                      | -              | -  | -        | -                                  | -                       |
|                                | Prison 11 (comparator)        | 1.0                                    | -              | -  | -        | -                                  | -                       |
|                                | Prison 12                     | -                                      | -              | -  | -        | -                                  | -                       |
|                                | Prison 13                     | 2.21                                   | (0.34, 14.44)  | -  | -        | -                                  | -                       |
| <b>Prison category</b>         |                               |                                        |                |    |          |                                    |                         |
|                                | A (comparator)                | 1.0                                    | -              | -  | -        | -                                  | -                       |
|                                | B                             | 1.15                                   | (0.39, 3.34)   | -  | -        | -                                  | -                       |
|                                | C                             | 2.40                                   | (0.77, 7.55)   | -  | -        | -                                  | -                       |
|                                | Closed                        | 0.75                                   | (0.13, 4.5)    | -  | -        | -                                  | -                       |
|                                | D                             | 4.09                                   | (0.47, 35.18)  | -  | -        | -                                  | -                       |
|                                | YOI                           | -                                      | -              | -  | -        | -                                  | -                       |
| <b>Gender</b>                  |                               |                                        |                |    |          |                                    |                         |
|                                | Female (comparator)           | 1.0                                    | -              | -  | -        | -                                  | -                       |
|                                | Male                          | 2.46                                   | (0.41, 14.62)  | -  | -        | -                                  | -                       |
| <b>Age - years</b>             |                               |                                        |                |    |          |                                    |                         |
|                                | 10 - <20                      | -                                      | -              | -  | -        | -                                  | -                       |
|                                | 20 - <30                      | -                                      | -              | -  | -        | -                                  | -                       |
|                                | 30 - <40                      | -                                      | -              | -  | -        | -                                  | -                       |
|                                | 40 - <50                      | -                                      | -              | -  | -        | -                                  | -                       |
|                                | 50 - <60 (comparator)         | 1.0                                    | -              | -  | -        | -                                  | -                       |
|                                | 60 - <70                      | 2.09                                   | (0.7, 6.27)    | -  | -        | -                                  | -                       |
|                                | 70 - <80                      | 2.16                                   | (0.65, 7.18)   | -  | -        | -                                  | -                       |
|                                | 80 - <90                      | 3.66                                   | (0.39, 34.14)  | -  | -        | -                                  | -                       |
|                                | 90 - <100                     | 0.40                                   | (0.05, 3.41)   | -  | -        | -                                  | -                       |
|                                | 100 - <110                    | -                                      | -              | -  | -        | -                                  | -                       |
| <b>Length of Stay (months)</b> |                               |                                        |                |    |          |                                    |                         |
|                                | <1                            | 0.75                                   | (0.06, 9.53)   | -  | -        | -                                  | -                       |
|                                | 1-<6 (comparator)             | 1.0                                    | -              | -  | -        | -                                  | -                       |
|                                | 6-<12                         | 3.04                                   | (0.28, 33.3)   | -  | -        | -                                  | -                       |
|                                | 12-<24                        | 3.62                                   | (0.54, 24.5)   | -  | -        | -                                  | -                       |
|                                | 24+                           | 0.52                                   | (0.13, 2.05)   | -  | -        | -                                  | -                       |
| <b>Ethnic Group</b>            |                               |                                        |                |    |          |                                    |                         |
|                                | White (comparator)            | -                                      | -              | -  | -        | -                                  | -                       |
|                                | Mixed                         | -                                      | -              | -  | -        | -                                  | -                       |
|                                | Asian or Asian British        | -                                      | -              | -  | -        | -                                  | -                       |
|                                | Black or Black British        | -                                      | -              | -  | -        | -                                  | -                       |
|                                | Chinese and Other             | -                                      | -              | -  | -        | -                                  | -                       |
|                                | Unclassified                  | -                                      | -              | -  | -        | -                                  | -                       |

The percentage of patients with atrial fibrillation in whom stroke risk has been assessed using the CHA2DS2-VASc score risk stratification scoring system in the preceding 12 months (excluding those patients with a previous CHADS2 or CHA2DS2-VASc score of 2 or more)

| Indicator                      | Group: Cardiovascular Disease |                                        |                |       |                |                                    |                         |
|--------------------------------|-------------------------------|----------------------------------------|----------------|-------|----------------|------------------------------------|-------------------------|
|                                | Variable                      | Odds Ratio (OR) of achieving indicator | (95% CI) of OR | OR    | (95% CI)       | Probability of achieving indicator | (95% CI) of probability |
| <b>Year</b>                    |                               |                                        |                |       |                |                                    |                         |
|                                | 2017/18 (comparator)          | 1.0                                    | -              | 1.0   | -              | 0.36                               | (-28.31, 29.03)         |
|                                | 2018/19                       | 2.34                                   | (0.69, 7.87)   | 2.58  | (0.57, 11.57)  | 0.54                               | (-43.09, 44.17)         |
|                                | 2019/20                       | 3.21                                   | (0.97, 10.69)  | 5.17  | (1.02, 26.2)   | 0.67                               | (-53.46, 54.8)          |
| <b>Prison</b>                  |                               |                                        |                |       |                |                                    |                         |
|                                | Prison 1                      | 0.67                                   | (0.02, 28.58)  | 2.77  | (0.01, 620.43) |                                    |                         |
|                                | Prison 2                      | 0.63                                   | (0.03, 11.5)   | 1.11  | (0.02, 55.53)  |                                    |                         |
|                                | Prison 3                      | -                                      | -              | -     | -              |                                    |                         |
|                                | Prison 4                      | 0.17                                   | (0.01, 2.71)   | 0.15  | (0.01, 4.33)   |                                    |                         |
|                                | Prison 5                      | -                                      | -              | -     | -              |                                    |                         |
|                                | Prison 6                      | 0.26                                   | (0.02, 4.62)   | 0.21  | (0, 14.91)     |                                    |                         |
|                                | Prison 7                      | -                                      | -              | -     | -              |                                    |                         |
|                                | Prison 8                      | -                                      | -              | -     | -              |                                    |                         |
|                                | Prison 9                      | 0.87                                   | (0.06, 12.79)  | 1.80  | (0.05, 58.91)  |                                    |                         |
|                                | Prison 10                     | 0.67                                   | (0.02, 28.58)  | 1.77  | (0.01, 465.58) |                                    |                         |
|                                | Prison 11 (comparator)        | 1.0                                    | -              | 1.0   | -              |                                    |                         |
|                                | Prison 12                     | -                                      | -              | -     | -              |                                    |                         |
|                                | Prison 13                     | 1.55                                   | (0.08, 29.79)  | 5.14  | (0.1, 276.4)   |                                    |                         |
| <b>Prison category</b>         |                               |                                        |                |       |                |                                    |                         |
|                                | A (comparator)                | 1.0                                    | -              | -     | -              | -                                  | -                       |
|                                | B                             | 0.29                                   | (0.07, 1.17)   | -     | -              | -                                  | -                       |
|                                | C                             | 0.19                                   | (0.05, 0.74)   | -     | -              | -                                  | -                       |
|                                | Closed                        | 0.95                                   | (0.07, 12.97)  | -     | -              | -                                  | -                       |
|                                | D                             | 0.22                                   | (0.04, 1.15)   | -     | -              | -                                  | -                       |
|                                | YOI                           | -                                      | -              | -     | -              | -                                  | -                       |
| <b>Gender</b>                  |                               |                                        |                |       |                |                                    |                         |
|                                | Female (comparator)           | 1.0                                    | -              | -     | -              | -                                  | -                       |
|                                | Male                          | 0.42                                   | (0.03, 5.29)   | -     | -              | -                                  | -                       |
| <b>Age - years</b>             |                               |                                        |                |       |                |                                    |                         |
|                                | 10 - <20                      | -                                      | -              | -     | -              | -                                  | -                       |
|                                | 20 - <30                      | 0.54                                   | (0.03, 10.66)  | -     | -              | -                                  | -                       |
|                                | 30 - <40                      | 0.51                                   | (0.11, 2.31)   | 2.25  | (0.09, 57.94)  | 0.52                               | (-41.79, 42.84)         |
|                                | 40 - <50                      | 0.53                                   | (0.07, 4.19)   | 13.68 | (0.24, 787.79) | 0.80                               | (-63.94, 65.55)         |
|                                | 50 - <60                      | 0.63                                   | (0.15, 2.7)    | 3.45  | (0.28, 42.73)  | 0.60                               | (-47.64, 48.83)         |
|                                | 60 - <70 (comparator)         | 1.0                                    | -              | 1.0   | -              | 0.39                               | (-30.72, 31.49)         |
|                                | 70 - <80                      | 0.99                                   | (0.26, 3.78)   | 3.52  | (0.4, 31.05)   | 0.60                               | (-47.89, 49.09)         |
|                                | 80 - <90                      | -                                      | -              | -     | -              | -                                  | -                       |
|                                | 90 - <100                     | -                                      | -              | -     | -              | -                                  | -                       |
|                                | 100 - <110                    | -                                      | -              | -     | -              | -                                  | -                       |
| <b>Length of Stay (months)</b> |                               |                                        |                |       |                |                                    |                         |
|                                | <1                            | -                                      | -              | -     | -              | -                                  | -                       |
|                                | 1-<6 (comparator)             | -                                      | -              | -     | -              | 0.36                               | (-29.06, 29.79)         |
|                                | 6-<12                         | 1.79                                   | (0.24, 13.23)  | 6.15  | (0.07, 531.88) | 0.68                               | (-54.14, 55.5)          |
|                                | 12-<24                        | 2.84                                   | (0.54, 14.99)  | 2.84  | (0.12, 67.51)  | 0.55                               | (-43.97, 45.07)         |
|                                | 24+                           | 2.42                                   | (0.58, 10.06)  | 2.62  | (0.12, 58.02)  | 0.54                               | (-42.83, 43.9)          |
| <b>Ethnic Group</b>            |                               |                                        |                |       |                |                                    |                         |
|                                | White (comparator)            | -                                      | -              | -     | -              | -                                  | -                       |
|                                | Mixed                         | -                                      | -              | -     | -              | -                                  | -                       |
|                                | Asian or Asian British        | -                                      | -              | -     | -              | -                                  | -                       |
|                                | Black or Black British        | -                                      | -              | -     | -              | -                                  | -                       |
|                                | Chinese and Other             | -                                      | -              | -     | -              | -                                  | -                       |
|                                | Unclassified                  | -                                      | -              | -     | -              | -                                  | -                       |



| Indicator                              | <i>The proportion of people aged 79 years or under, with coronary heart disease, hypertension, stroke, transient ischaemic attack or peripheral arterial disease, who have had a blood pressure of 140/90mmHg or less in the preceding 12 months</i> |                |               |               |                                    |                         |               |
|----------------------------------------|------------------------------------------------------------------------------------------------------------------------------------------------------------------------------------------------------------------------------------------------------|----------------|---------------|---------------|------------------------------------|-------------------------|---------------|
|                                        | Group: Cardiovascular Disease                                                                                                                                                                                                                        |                |               |               |                                    |                         |               |
|                                        | Variable                                                                                                                                                                                                                                             | Univariate     |               | Multivariable |                                    |                         |               |
| Odds Ratio (OR) of achieving indicator |                                                                                                                                                                                                                                                      | (95% CI) of OR | OR            | (95% CI)      | Probability of achieving indicator | (95% CI) of probability |               |
| <b>Year</b>                            |                                                                                                                                                                                                                                                      |                |               |               |                                    |                         |               |
|                                        | 2017/18 (comparator)                                                                                                                                                                                                                                 | 1.0            | -             | 1.0           | -                                  | 0.48                    | (-0.68, 1.63) |
|                                        | 2018/19                                                                                                                                                                                                                                              | 0.97           | (0.82, 1.15)  | 0.90          | (0.75, 1.09)                       | 0.45                    | (-0.64, 1.55) |
|                                        | 2019/20                                                                                                                                                                                                                                              | 0.91           | (0.77, 1.07)  | 0.94          | (0.78, 1.13)                       | 0.46                    | (-0.66, 1.58) |
| <b>Prison</b>                          |                                                                                                                                                                                                                                                      |                |               |               |                                    |                         |               |
|                                        | Prison 1                                                                                                                                                                                                                                             | 2.57           | (1.81, 3.66)  | 2.72          | (1.76, 4.22)                       | 0.58                    | (-0.82, 1.98) |
|                                        | Prison 2                                                                                                                                                                                                                                             | 1.20           | (0.87, 1.64)  | 1.09          | (0.76, 1.56)                       | 0.36                    | (-0.51, 1.23) |
|                                        | Prison 3                                                                                                                                                                                                                                             | 1.56           | (1.14, 2.15)  | 1.46          | (0.99, 2.15)                       | 0.43                    | (-0.61, 1.46) |
|                                        | Prison 4                                                                                                                                                                                                                                             | 2.45           | (1.86, 3.23)  | 1.98          | (1.39, 2.83)                       | 0.50                    | (-0.71, 1.71) |
|                                        | Prison 5                                                                                                                                                                                                                                             | 3.18           | (2.08, 4.87)  | 3.25          | (1.94, 5.45)                       | 0.62                    | (-0.88, 2.12) |
|                                        | Prison 6                                                                                                                                                                                                                                             | 3.49           | (2.51, 4.86)  | 3.42          | (2.28, 5.12)                       | 0.63                    | (-0.9, 2.16)  |
|                                        | Prison 7                                                                                                                                                                                                                                             | 2.56           | (1.71, 3.85)  | 1.08          | (0.15, 7.98)                       | 0.36                    | (-0.6, 1.31)  |
|                                        | Prison 8                                                                                                                                                                                                                                             | 5.20           | (3.54, 7.64)  | 3.00          | (0.39, 22.95)                      | 0.60                    | (-0.92, 2.12) |
|                                        | Prison 9                                                                                                                                                                                                                                             | 1.55           | (1.16, 2.07)  | 1.09          | (0.73, 1.63)                       | 0.36                    | (-0.51, 1.23) |
|                                        | Prison 10                                                                                                                                                                                                                                            | 2.81           | (2.12, 3.74)  | 2.48          | (1.79, 3.44)                       | 0.56                    | (-0.79, 1.9)  |
|                                        | Prison 11 (comparator)                                                                                                                                                                                                                               | 1.0            | -             | 1.0           | -                                  | 0.34                    | (-0.48, 1.16) |
|                                        | Prison 12                                                                                                                                                                                                                                            | 2.41           | (0.33, 17.29) | 0.52          | (0.04, 6.2)                        | 0.21                    | (-0.44, 0.87) |
|                                        | Prison 13                                                                                                                                                                                                                                            | 1.83           | (1.31, 2.56)  | 1.38          | (0.89, 2.16)                       | 0.41                    | (-0.59, 1.42) |
| <b>Prison category</b>                 |                                                                                                                                                                                                                                                      |                |               |               |                                    |                         |               |
|                                        | A (comparator)                                                                                                                                                                                                                                       | 1.0            | -             |               |                                    |                         |               |
|                                        | B                                                                                                                                                                                                                                                    | 0.95           | (0.78, 1.15)  |               |                                    |                         |               |
|                                        | C                                                                                                                                                                                                                                                    | 1.32           | (1.08, 1.62)  |               |                                    |                         |               |
|                                        | Closed                                                                                                                                                                                                                                               | 2.31           | (1.74, 3.06)  |               |                                    |                         |               |
|                                        | D                                                                                                                                                                                                                                                    | 2.06           | (1.58, 2.68)  |               |                                    |                         |               |
|                                        | YOI                                                                                                                                                                                                                                                  | 1.47           | (0.21, 10.5)  |               |                                    |                         |               |
| <b>Gender</b>                          |                                                                                                                                                                                                                                                      |                |               |               |                                    |                         |               |
|                                        | Female (comparator)                                                                                                                                                                                                                                  | 1.0            | -             | 1.0           | -                                  | 0.56                    | (-0.86, 1.98) |
|                                        | Male                                                                                                                                                                                                                                                 | 0.50           | (0.39, 0.66)  | 0.6           | (0.09, 4.79)                       | 0.46                    | (-0.65, 1.56) |
| <b>Age - years</b>                     |                                                                                                                                                                                                                                                      |                |               |               |                                    |                         |               |
|                                        | 10 - <20                                                                                                                                                                                                                                             | -              | -             | -             | -                                  | -                       | -             |
|                                        | 20 - <30                                                                                                                                                                                                                                             | 1.45           | (1.01, 2.09)  | 1.88          | (1.23, 2.86)                       | 0.60                    | (-0.86, 2.06) |
|                                        | 30 - <40                                                                                                                                                                                                                                             | 1.26           | (1.02, 1.56)  | 1.36          | (1.06, 1.74)                       | 0.53                    | (-0.75, 1.8)  |
|                                        | 40 - <50                                                                                                                                                                                                                                             | 0.98           | (0.82, 1.17)  | 1.00          | (0.82, 1.23)                       | 0.45                    | (-0.65, 1.56) |
|                                        | 50 - <60 (comparator)                                                                                                                                                                                                                                | 1.0            | -             | 1.0           | -                                  | 0.45                    | (-0.65, 1.55) |
|                                        | 60 - <70                                                                                                                                                                                                                                             | 0.92           | (0.75, 1.12)  | 0.91          | (0.73, 1.15)                       | 0.43                    | (-0.61, 1.48) |
|                                        | 70 - <80                                                                                                                                                                                                                                             | 0.87           | (0.66, 1.16)  | 0.87          | (0.63, 1.2)                        | 0.42                    | (-0.6, 1.44)  |
|                                        | 80 - <90                                                                                                                                                                                                                                             | -              | -             | -             | -                                  | -                       | -             |
|                                        | 90 - <100                                                                                                                                                                                                                                            | -              | -             | -             | -                                  | -                       | -             |
|                                        | 100 - <110                                                                                                                                                                                                                                           | -              | -             | -             | -                                  | -                       | -             |
| <b>Length of Stay (months)</b>         |                                                                                                                                                                                                                                                      |                |               |               |                                    |                         |               |
|                                        | <1                                                                                                                                                                                                                                                   | 0.78           | (0.62, 0.98)  | 0.97          | (0.73, 1.27)                       | 0.44                    | (-0.63, 1.51) |
|                                        | 1-<6 (comparator)                                                                                                                                                                                                                                    | 1.0            | -             | 1.0           | -                                  | 0.45                    | (-0.64, 1.53) |
|                                        | 6-<12                                                                                                                                                                                                                                                | 0.96           | (0.78, 1.19)  | 0.88          | (0.68, 1.13)                       | 0.42                    | (-0.6, 1.43)  |
|                                        | 12-<24                                                                                                                                                                                                                                               | 1.02           | (0.83, 1.26)  | 0.93          | (0.72, 1.2)                        | 0.43                    | (-0.61, 1.47) |
|                                        | 24+                                                                                                                                                                                                                                                  | 1.01           | (0.84, 1.22)  | 1.42          | (1.08, 1.87)                       | 0.53                    | (-0.75, 1.81) |
| <b>Ethnic Group</b>                    |                                                                                                                                                                                                                                                      |                |               |               |                                    |                         |               |
|                                        | White (comparator)                                                                                                                                                                                                                                   | 1.0            | -             | 1.0           | -                                  | 0.46                    | (-0.66, 1.59) |
|                                        | Mixed                                                                                                                                                                                                                                                | 0.63           | (0.31, 1.27)  | 0.56          | (0.27, 1.17)                       | 0.33                    | (-0.49, 1.16) |
|                                        | Asian or Asian British                                                                                                                                                                                                                               | 2.05           | (1.3, 3.26)   | 1.76          | (1.09, 2.84)                       | 0.60                    | (-0.85, 2.04) |
|                                        | Black or Black British                                                                                                                                                                                                                               | 0.70           | (0.4, 1.25)   | 0.75          | (0.41, 1.37)                       | 0.40                    | (-0.57, 1.37) |
|                                        | Chinese and Other                                                                                                                                                                                                                                    | 0.90           | (0.42, 1.94)  | 0.96          | (0.43, 2.11)                       | 0.45                    | (-0.66, 1.57) |
|                                        | Unclassified                                                                                                                                                                                                                                         | 0.71           | (0.41, 1.22)  | 0.80          | (0.44, 1.46)                       | 0.41                    | (-0.59, 1.42) |

| Indicator                      | The percentage of patients who had a myocardial infarction who are currently being treated with ACE-I (or ARB if ACE-I intolerant), anti-platelet therapy, beta-blocker and a statin |              |               |               |              |               |        |              |   |
|--------------------------------|--------------------------------------------------------------------------------------------------------------------------------------------------------------------------------------|--------------|---------------|---------------|--------------|---------------|--------|--------------|---|
|                                | Group: Cardiovascular Disease                                                                                                                                                        |              |               |               |              |               |        |              |   |
| Variable                       | Univariate: Odds ratios (95% CI)                                                                                                                                                     |              |               |               |              |               |        |              |   |
|                                | ACEI                                                                                                                                                                                 |              | Anti Platelet |               | Beta Blocker |               | Statin |              |   |
| <b>Year</b>                    |                                                                                                                                                                                      |              |               |               |              |               |        |              |   |
| 2017/18 (comparator)           | 1.0                                                                                                                                                                                  | -            | 1.0           | -             | 1.0          | -             | 1.0    | -            | - |
| 2018/19                        | 1.10                                                                                                                                                                                 | (0.82, 1.47) | 1.01          | (0.76, 1.35)  | 1.00         | (0.75, 1.33)  | 0.75   | (0.54, 1.02) | - |
| 2019/20                        | 1.19                                                                                                                                                                                 | (0.9, 1.58)  | 1.09          | (0.82, 1.44)  | 1.04         | (0.79, 1.37)  | 0.83   | (0.61, 1.13) | - |
| <b>Prison</b>                  |                                                                                                                                                                                      |              |               |               |              |               |        |              |   |
| Prison 1                       | 0.19                                                                                                                                                                                 | (0.07, 0.57) | 1.12          | (0.56, 2.25)  | 0.75         | (0.38, 1.49)  | 0.81   | (0.4, 1.63)  | - |
| Prison 2                       | 1.44                                                                                                                                                                                 | (0.92, 2.27) | 1.68          | (1.06, 2.65)  | 0.84         | (0.54, 1.31)  | 1.05   | (0.66, 1.67) | - |
| Prison 3                       | 0.83                                                                                                                                                                                 | (0.5, 1.38)  | 1.08          | (0.67, 1.74)  | 1.04         | (0.64, 1.68)  | 1.57   | (0.93, 2.68) | - |
| Prison 4                       | 1.70                                                                                                                                                                                 | (1.12, 2.59) | 2.05          | (1.33, 3.15)  | 1.39         | (0.91, 2.12)  | 2.14   | (1.33, 3.44) | - |
| Prison 5                       | 0.81                                                                                                                                                                                 | (0.36, 1.82) | 1.41          | (0.65, 3.04)  | 1.44         | (0.66, 3.17)  | 1.19   | (0.53, 2.68) | - |
| Prison 6                       | 1.28                                                                                                                                                                                 | (0.77, 2.13) | 0.53          | (0.32, 0.87)  | 0.73         | (0.44, 1.19)  | 1.32   | (0.77, 2.26) | - |
| Prison 7                       | 0.72                                                                                                                                                                                 | (0.28, 1.83) | 0.60          | (0.25, 1.41)  | 0.54         | (0.23, 1.27)  | 0.45   | (0.19, 1.06) | - |
| Prison 8                       | 0.79                                                                                                                                                                                 | (0.41, 1.51) | 0.87          | (0.48, 1.59)  | 0.34         | (0.18, 0.64)  | 0.65   | (0.35, 1.2)  | - |
| Prison 9                       | 1.64                                                                                                                                                                                 | (1.08, 2.51) | 2.29          | (1.47, 3.58)  | 1.14         | (0.75, 1.74)  | 2.51   | (1.53, 4.12) | - |
| Prison 10                      | 1.25                                                                                                                                                                                 | (0.79, 1.99) | 0.79          | (0.51, 1.25)  | 0.92         | (0.58, 1.45)  | 0.76   | (0.48, 1.22) | - |
| Prison 11 (comparator)         | 1.0                                                                                                                                                                                  | -            | 1.0           | -             | 1.0          | -             | 1.0    | -            | - |
| Prison 12                      | -                                                                                                                                                                                    | -            | 0.84          | (0.05, 13.74) | 0.76         | (0.05, 12.4)  | -      | -            | - |
| Prison 13                      | 1.33                                                                                                                                                                                 | (0.82, 2.16) | 1.62          | (0.99, 2.65)  | 1.24         | (0.76, 2.01)  | 2.21   | (1.26, 3.89) | - |
| <b>Prison category</b>         |                                                                                                                                                                                      |              |               |               |              |               |        |              |   |
| A (comparator)                 | 1.0                                                                                                                                                                                  | -            | 1.0           | -             | 1.0          | -             | 1.0    | -            | - |
| B                              | 0.79                                                                                                                                                                                 | (0.58, 1.07) | 0.55          | (0.4, 0.75)   | 0.78         | (0.58, 1.06)  | 0.39   | (0.27, 0.56) | - |
| C                              | 0.73                                                                                                                                                                                 | (0.53, 1.02) | 0.76          | (0.54, 1.07)  | 0.99         | (0.71, 1.37)  | 0.70   | (0.47, 1.04) | - |
| Closed                         | 0.51                                                                                                                                                                                 | (0.3, 0.87)  | 0.39          | (0.23, 0.65)  | 0.33         | (0.2, 0.56)   | 0.24   | (0.14, 0.42) | - |
| D                              | 0.76                                                                                                                                                                                 | (0.49, 1.16) | 0.34          | (0.22, 0.53)  | 0.73         | (0.48, 1.12)  | 0.54   | (0.33, 0.88) | - |
| YOI                            | -                                                                                                                                                                                    | -            | 0.42          | (0.03, 6.9)   | 0.64         | (0.04, 10.41) | -      | -            | - |
| <b>Gender</b>                  |                                                                                                                                                                                      |              |               |               |              |               |        |              |   |
| Female (comparator)            | 1.0                                                                                                                                                                                  | -            | 1.0           | -             | 1.0          | -             | 1.0    | -            | - |
| Male                           | 1.48                                                                                                                                                                                 | (0.87, 2.51) | 1.62          | (0.99, 2.67)  | 2.73         | (1.62, 4.62)  | 2.24   | (1.36, 3.7)  | - |
| <b>Age - years</b>             |                                                                                                                                                                                      |              |               |               |              |               |        |              |   |
| 10 - <20                       | -                                                                                                                                                                                    | -            | -             | -             | -            | -             | -      | -            | - |
| 20 - <30                       | 0.11                                                                                                                                                                                 | (0.02, 0.46) | 0.16          | (0.06, 0.42)  | 0.27         | (0.11, 0.67)  | 0.04   | (0.01, 0.15) | - |
| 30 - <40                       | 0.34                                                                                                                                                                                 | (0.2, 0.58)  | 0.11          | (0.06, 0.19)  | 0.33         | (0.21, 0.53)  | 0.09   | (0.06, 0.16) | - |
| 40 - <50                       | 0.59                                                                                                                                                                                 | (0.42, 0.84) | 0.49          | (0.35, 0.69)  | 0.63         | (0.45, 0.88)  | 0.46   | (0.32, 0.66) | - |
| 50 - <60                       | 1.0                                                                                                                                                                                  | -            | 1.0           | -             | 1.0          | -             | 1.0    | -            | - |
| 60 - <70 (comparator)          | 0.97                                                                                                                                                                                 | (0.73, 1.29) | 1.16          | (0.85, 1.57)  | 1.05         | (0.78, 1.4)   | 1.26   | (0.89, 1.79) | - |
| 70 - <80                       | 0.89                                                                                                                                                                                 | (0.6, 1.33)  | 0.82          | (0.55, 1.23)  | 1.13         | (0.75, 1.69)  | 1.32   | (0.8, 2.16)  | - |
| 80 - <90                       | 0.51                                                                                                                                                                                 | (0.24, 1.11) | 0.87          | (0.41, 1.81)  | 1.33         | (0.63, 2.81)  | 1.38   | (0.55, 3.43) | - |
| 90 - <100                      | -                                                                                                                                                                                    | -            | -             | -             | -            | -             | -      | -            | - |
| 100 - <110                     | -                                                                                                                                                                                    | -            | -             | -             | -            | -             | -      | -            | - |
| <b>Length of Stay (months)</b> |                                                                                                                                                                                      |              |               |               |              |               |        |              |   |
| <1                             | 0.55                                                                                                                                                                                 | (0.36, 0.83) | 0.54          | (0.37, 0.79)  | 0.54         | (0.37, 0.79)  | 0.63   | (0.43, 0.93) | - |
| 1-<6 (comparator)              | 1.0                                                                                                                                                                                  | -            | 1.0           | -             | 1.0          | -             | 1.0    | -            | - |
| 6-<12                          | 0.89                                                                                                                                                                                 | (0.62, 1.29) | 1.08          | (0.75, 1.54)  | 1.03         | (0.72, 1.47)  | 1.43   | (0.98, 2.09) | - |
| 12-<24                         | 1.24                                                                                                                                                                                 | (0.87, 1.78) | 0.94          | (0.65, 1.34)  | 1.03         | (0.72, 1.48)  | 1.28   | (0.88, 1.88) | - |
| 24+                            | 1.35                                                                                                                                                                                 | (0.99, 1.83) | 1.93          | (1.4, 2.65)   | 1.02         | (0.75, 1.38)  | 3.02   | (2.1, 4.33)  | - |
| <b>Ethnic Group</b>            |                                                                                                                                                                                      |              |               |               |              |               |        |              |   |
| White (comparator)             | 1.0                                                                                                                                                                                  | -            | 1.0           | -             | 1.0          | -             | 1.0    | -            | - |
| Mixed                          | 1.49                                                                                                                                                                                 | (0.55, 4.01) | 0.49          | (0.18, 1.34)  | 0.27         | (0.09, 0.84)  | 0.43   | (0.16, 1.16) | - |
| Asian or Asian British         | 0.59                                                                                                                                                                                 | (0.29, 1.21) | 0.69          | (0.36, 1.33)  | 1.22         | (0.63, 2.38)  | 1.39   | (0.65, 2.99) | - |
| Black or Black British         | 2.10                                                                                                                                                                                 | (0.84, 5.28) | 0.71          | (0.28, 1.75)  | 1.74         | (0.65, 4.6)   | 0.72   | (0.28, 1.84) | - |
| Chinese and Other              | 0.23                                                                                                                                                                                 | (0.03, 1.85) | 1.07          | (0.25, 4.51)  | 1.34         | (0.32, 5.63)  | 0.40   | (0.1, 1.62)  | - |
| Unclassified                   | 2.39                                                                                                                                                                                 | (1.06, 5.39) | 0.51          | (0.23, 1.13)  | 0.87         | (0.39, 1.93)  | 2.13   | (0.72, 6.28) | - |

| Indicator                      | The percentage of patients who had a myocardial infarction who are currently being treated with ACE-I (or ARB if ACE-I intolerant), anti-platelet therapy, beta-blocker and a statin |                                             |                    |                                             |                    |                                             |                   |                                             |             |                                             |
|--------------------------------|--------------------------------------------------------------------------------------------------------------------------------------------------------------------------------------|---------------------------------------------|--------------------|---------------------------------------------|--------------------|---------------------------------------------|-------------------|---------------------------------------------|-------------|---------------------------------------------|
|                                | Domain: Routine primary care                                                                                                                                                         |                                             |                    |                                             |                    |                                             |                   |                                             |             |                                             |
|                                | Variable                                                                                                                                                                             | ACEI                                        |                    | Anti Platelet                               |                    | Multivariable                               |                   | Beta Blocker                                |             | Statin                                      |
| OR (95% CI)                    |                                                                                                                                                                                      | Probability of achieving indicator (95% CI) | OR (95% CI)        | Probability of achieving indicator (95% CI) | OR (95% CI)        | Probability of achieving indicator (95% CI) | OR (95% CI)       | Probability of achieving indicator (95% CI) | OR (95% CI) | Probability of achieving indicator (95% CI) |
| <b>Year</b>                    |                                                                                                                                                                                      |                                             |                    |                                             |                    |                                             |                   |                                             |             |                                             |
| 2017/18 (comparator)           | 1.0                                                                                                                                                                                  | 0.35 (-1.25, 1.96)                          | 1.0                | 0.58 (-0.64, 1.8)                           | 1.0                | 0.55 (-2.15, 3.25)                          | 1.0               | 0.71 (-15.5, 16.92)                         |             |                                             |
| 2018/19                        | 1.32 (0.95, 1.82)                                                                                                                                                                    | 0.41 (-1.47, 2.29)                          | 1.15 (0.82, 1.61)  | 0.61 (-0.67, 1.89)                          | 1.04 (0.76, 1.43)  | 0.56 (-2.19, 3.3)                           | 0.97 (0.67, 1.41) | 0.7 (-15.4, 16.8)                           |             |                                             |
| 2019/20                        | 1.47 (1.07, 2.02)                                                                                                                                                                    | 0.44 (-1.55, 2.43)                          | 1.24 (0.89, 1.74)  | 0.62 (-0.69, 1.94)                          | 1.09 (0.8, 1.49)   | 0.57 (-2.23, 3.36)                          | 1.04 (0.72, 1.51) | 0.71 (-15.66, 17.09)                        |             |                                             |
| <b>Prison</b>                  |                                                                                                                                                                                      |                                             |                    |                                             |                    |                                             |                   |                                             |             |                                             |
| Prison 1                       | 0.17 (0.05, 0.53)                                                                                                                                                                    | 0.1 (-0.35, 0.55)                           | 0.76 (0.33, 1.76)  | 0.56 (-0.63, 1.76)                          | 0.63 (0.28, 1.38)  | 0.45 (-1.79, 2.7)                           | 0.66 (0.27, 1.57) | 0.62 (-13.55, 14.78)                        |             |                                             |
| Prison 2                       | 1.39 (0.81, 2.39)                                                                                                                                                                    | 0.44 (-1.57, 2.45)                          | 1.13 (0.65, 1.98)  | 0.64 (-0.71, 1.99)                          | 0.71 (0.42, 1.2)   | 0.48 (-1.9, 2.87)                           | 0.83 (0.47, 1.49) | 0.66 (-14.46, 15.78)                        |             |                                             |
| Prison 3                       | 0.75 (0.4, 1.4)                                                                                                                                                                      | 0.31 (-1.1, 1.72)                           | 0.62 (0.34, 1.15)  | 0.52 (-0.58, 1.63)                          | 0.79 (0.43, 1.43)  | 0.51 (-1.99, 3)                             | 1.09 (0.55, 2.16) | 0.7 (-15.37, 16.78)                         |             |                                             |
| Prison 4                       | 1.47 (0.83, 2.6)                                                                                                                                                                     | 0.45 (-1.61, 2.51)                          | 1.13 (0.62, 2.07)  | 0.64 (-0.71, 1.99)                          | 1.14 (0.65, 2.02)  | 0.59 (-2.31, 3.49)                          | 1.17 (0.61, 2.24) | 0.71 (-15.61, 17.03)                        |             |                                             |
| Prison 5                       | 0.56 (0.22, 1.45)                                                                                                                                                                    | 0.26 (-0.92, 1.43)                          | 0.61 (0.24, 1.53)  | 0.52 (-0.59, 1.62)                          | 1.25 (0.48, 3.25)  | 0.61 (-2.39, 3.6)                           | 0.64 (0.24, 1.67) | 0.61 (-13.43, 14.65)                        |             |                                             |
| Prison 6                       | 1.07 (0.55, 2.05)                                                                                                                                                                    | 0.38 (-1.36, 2.13)                          | 0.25 (0.13, 0.49)  | 0.33 (-0.37, 1.03)                          | 0.59 (0.31, 1.12)  | 0.44 (-1.73, 2.61)                          | 1.12 (0.54, 2.32) | 0.71 (-15.47, 16.89)                        |             |                                             |
| Prison 7                       | 2270222.54 (0, 0)                                                                                                                                                                    | 0.97 (-3.43, 5.37)                          | 190089.57 (0, 0)   | 0.96 (-1.07, 3)                             | 575519.7 (0, 0)    | 0.97 (-3.81, 5.75)                          | 22348.3 (0, 0)    | 0.97 (-21.17, 23.1)                         |             |                                             |
| Prison 8                       | 1228954.86 (0, 0)                                                                                                                                                                    | 0.96 (-3.41, 5.33)                          | 420240.76 (0, 0)   | 0.97 (-1.08, 3.02)                          | 320671.23 (0, 0)   | 0.96 (-3.78, 5.71)                          | 46751.94 (0, 0)   | 0.97 (-21.34, 23.29)                        |             |                                             |
| Prison 9                       | 1.26 (0.68, 2.34)                                                                                                                                                                    | 0.42 (-1.49, 2.33)                          | 0.99 (0.52, 1.9)   | 0.61 (-0.68, 1.91)                          | 1.12 (0.61, 2.07)  | 0.58 (-2.3, 3.46)                           | 1.2 (0.58, 2.47)  | 0.72 (-15.69, 17.13)                        |             |                                             |
| Prison 10                      | 1.42 (0.82, 2.48)                                                                                                                                                                    | 0.44 (-1.58, 2.47)                          | 0.63 (0.36, 1.1)   | 0.52 (-0.58, 1.63)                          | 0.81 (0.47, 1.39)  | 0.51 (-2.02, 3.04)                          | 0.63 (0.35, 1.14) | 0.61 (-13.41, 14.64)                        |             |                                             |
| Prison 11 (comparator)         | 1.0                                                                                                                                                                                  | 0.37 (-1.31, 2.05)                          | 1.0                | 0.62 (-0.69, 1.92)                          | 1.0                | 0.56 (-2.2, 3.32)                           | 1.0               | 0.69 (-15.1, 16.48)                         |             |                                             |
| Prison 12                      | -                                                                                                                                                                                    | -                                           | 3.21 (0.16, 65.61) | 0.79 (-0.91, 2.49)                          | 1.92 (0.1, 38.08)  | 0.69 (-2.75, 4.13)                          | -                 | -                                           |             |                                             |
| Prison 13                      | 0.79 (0.4, 1.57)                                                                                                                                                                     | 0.32 (-1.14, 1.78)                          | 0.95 (0.47, 1.93)  | 0.61 (-0.68, 1.89)                          | 1.02 (0.53, 1.98)  | 0.56 (-2.22, 3.35)                          | 0.84 (0.38, 1.81) | 0.66 (-14.47, 15.79)                        |             |                                             |
| <b>Prison category</b>         |                                                                                                                                                                                      |                                             |                    |                                             |                    |                                             |                   |                                             |             |                                             |
| A (comparator)                 |                                                                                                                                                                                      |                                             |                    |                                             |                    |                                             |                   |                                             |             |                                             |
| A/B                            |                                                                                                                                                                                      |                                             |                    |                                             |                    |                                             |                   |                                             |             |                                             |
| B                              |                                                                                                                                                                                      |                                             |                    |                                             |                    |                                             |                   |                                             |             |                                             |
| C                              |                                                                                                                                                                                      |                                             |                    |                                             |                    |                                             |                   |                                             |             |                                             |
| Closed                         |                                                                                                                                                                                      |                                             |                    |                                             |                    |                                             |                   |                                             |             |                                             |
| D                              |                                                                                                                                                                                      |                                             |                    |                                             |                    |                                             |                   |                                             |             |                                             |
| YOI                            |                                                                                                                                                                                      |                                             |                    |                                             |                    |                                             |                   |                                             |             |                                             |
| <b>Gender</b>                  |                                                                                                                                                                                      |                                             |                    |                                             |                    |                                             |                   |                                             |             |                                             |
| Female (comparator)            | 1.0                                                                                                                                                                                  | 0.02 (-0.06, 0.1)                           | 1.0                | 0.03 (-0.03, 0.09)                          | 1.0                | 0.02 (-0.08, 0.12)                          | 1.0               | 0.03 (-0.68, 0.74)                          |             |                                             |
| Male                           | 1721535.63 (0, 0)                                                                                                                                                                    | 0.44 (-1.58, 2.46)                          | 602493.15 (0, 0)   | 0.63 (-0.7, 1.97)                           | 829669.15 (0, 0)   | 0.59 (-2.34, 3.53)                          | 68865.26 (0, 0)   | 0.74 (-16.12, 17.59)                        |             |                                             |
| <b>Age - years</b>             |                                                                                                                                                                                      |                                             |                    |                                             |                    |                                             |                   |                                             |             |                                             |
| 10 - <20                       | -                                                                                                                                                                                    | -                                           | -                  | -                                           | -                  | -                                           | -                 | -                                           |             |                                             |
| 20 - <30                       | 0.15 (0.03, 0.66)                                                                                                                                                                    | 0.12 (-0.44, 0.68)                          | 0.1 (0.03, 0.33)   | 0.21 (-0.27, 0.69)                          | 0.2 (0.07, 0.57)   | 0.26 (-1.03, 1.55)                          | 0.03 (0.01, 0.16) | 0.13 (-2.83, 3.09)                          |             |                                             |
| 30 - <40                       | 0.36 (0.2, 0.65)                                                                                                                                                                     | 0.24 (-0.87, 1.35)                          | 0.09 (0.05, 0.17)  | 0.19 (-0.22, 0.59)                          | 0.27 (0.16, 0.47)  | 0.32 (-1.28, 1.92)                          | 0.09 (0.05, 0.17) | 0.27 (-5.81, 6.34)                          |             |                                             |
| 40 - <50                       | 0.64 (0.44, 0.96)                                                                                                                                                                    | 0.36 (-1.28, 1.99)                          | 0.5 (0.33, 0.73)   | 0.54 (-0.6, 1.68)                           | 0.55 (0.38, 0.8)   | 0.48 (-1.91, 2.87)                          | 0.52 (0.34, 0.78) | 0.65 (-14.24, 15.54)                        |             |                                             |
| 50 - <60 (comparator)          | 1.0                                                                                                                                                                                  | 0.46 (-1.63, 2.54)                          | 1.0                | 0.69 (-0.77, 2.15)                          | 1.0                | 0.63 (-2.46, 3.71)                          | 1.0               | 0.77 (-16.97, 18.51)                        |             |                                             |
| 60 - <70                       | 0.88 (0.64, 1.23)                                                                                                                                                                    | 0.43 (-1.53, 2.39)                          | 0.96 (0.67, 1.36)  | 0.68 (-0.76, 2.12)                          | 0.79 (0.57, 1.09)  | 0.57 (-2.25, 3.39)                          | 1.04 (0.7, 1.54)  | 0.78 (-17.11, 18.67)                        |             |                                             |
| 70 - <80                       | 0.78 (0.5, 1.2)                                                                                                                                                                      | 0.4 (-1.43, 2.23)                           | 0.63 (0.4, 0.99)   | 0.59 (-0.66, 1.84)                          | 0.9 (0.58, 1.39)   | 0.6 (-2.36, 3.56)                           | 1 (0.58, 1.72)    | 0.77 (-16.97, 18.52)                        |             |                                             |
| 80 - <90                       | 0.5 (0.22, 1.13)                                                                                                                                                                     | 0.3 (-1.09, 1.7)                            | 0.61 (0.28, 1.35)  | 0.59 (-0.66, 1.83)                          | 1.05 (0.48, 2.29)  | 0.64 (-2.5, 3.78)                           | 1.07 (0.41, 2.79) | 0.79 (-17.21, 18.78)                        |             |                                             |
| 90 - <100                      | -                                                                                                                                                                                    | -                                           | -                  | -                                           | -                  | -                                           | -                 | -                                           |             |                                             |
| 100 - <110                     | -                                                                                                                                                                                    | -                                           | -                  | -                                           | -                  | -                                           | -                 | -                                           |             |                                             |
| <b>Length of Stay (months)</b> |                                                                                                                                                                                      |                                             |                    |                                             |                    |                                             |                   |                                             |             |                                             |
| <1                             | 0.45 (0.27, 0.75)                                                                                                                                                                    | 0.25 (-0.91, 1.42)                          | 0.42 (0.26, 0.68)  | 0.42 (-0.47, 1.31)                          | 0.41 (0.26, 0.66)  | 0.43 (-1.68, 2.53)                          | 0.48 (0.3, 0.79)  | 0.54 (-11.84, 12.92)                        |             |                                             |
| 1-6 (comparator)               | 1.0                                                                                                                                                                                  | 0.42 (-1.49, 2.32)                          | 1.0                | 0.61 (-0.68, 1.89)                          | 1.0                | 0.63 (-2.48, 3.74)                          | 1.0               | 0.69 (-15.1, 16.48)                         |             |                                             |
| 6-12                           | 0.96 (0.62, 1.48)                                                                                                                                                                    | 0.41 (-1.45, 2.27)                          | 1.38 (0.88, 2.17)  | 0.67 (-0.75, 2.09)                          | 0.95 (0.62, 1.45)  | 0.62 (-2.44, 3.67)                          | 1.76 (1.07, 2.89) | 0.78 (-17.12, 18.69)                        |             |                                             |
| 12-24                          | 1.24 (0.79, 1.93)                                                                                                                                                                    | 0.47 (-1.66, 2.59)                          | 0.78 (0.49, 1.24)  | 0.56 (-0.62, 1.73)                          | 0.74 (0.48, 1.16)  | 0.56 (-2.22, 3.35)                          | 0.81 (0.5, 1.32)  | 0.65 (-14.23, 15.52)                        |             |                                             |
| 24+                            | 0.98 (0.63, 1.53)                                                                                                                                                                    | 0.41 (-1.47, 2.29)                          | 1.28 (0.8, 2.06)   | 0.66 (-0.73, 2.05)                          | 0.62 (0.4, 0.97)   | 0.52 (-2.05, 3.09)                          | 1.75 (1.03, 2.98) | 0.78 (-17.11, 18.67)                        |             |                                             |
| <b>Ethnic Group</b>            |                                                                                                                                                                                      |                                             |                    |                                             |                    |                                             |                   |                                             |             |                                             |
| White (comparator)             | 1.0                                                                                                                                                                                  | 0.4 (-1.41, 2.21)                           | 1.0                | 0.61 (-0.68, 1.9)                           | 1.0                | 0.55 (-2.18, 3.29)                          | 1.0               | 0.71 (-15.5, 16.91)                         |             |                                             |
| Mixed                          | 1.38 (0.47, 4.06)                                                                                                                                                                    | 0.47 (-1.69, 2.63)                          | 0.96 (0.29, 3.11)  | 0.6 (-0.69, 1.89)                           | 0.41 (0.12, 1.37)  | 0.35 (-1.39, 2.09)                          | 0.35 (0.1, 1.2)   | 0.5 (-11, 12)                               |             |                                             |
| Asian or Asian British         | 0.61 (0.28, 1.34)                                                                                                                                                                    | 0.3 (-1.06, 1.65)                           | 1.14 (0.54, 2.42)  | 0.64 (-0.71, 1.99)                          | 1.54 (0.76, 3.13)  | 0.65 (-2.56, 3.87)                          | 2.56 (1.05, 6.25) | 0.84 (-18.33, 20.01)                        |             |                                             |
| Black or Black British         | 2.5 (0.94, 6.63)                                                                                                                                                                     | 0.6 (-2.16, 3.37)                           | 0.53 (0.2, 1.4)    | 0.48 (-0.55, 1.5)                           | 1.68 (0.61, 4.62)  | 0.67 (-2.64, 3.98)                          | 0.59 (0.21, 1.67) | 0.61 (-13.35, 14.57)                        |             |                                             |
| Chinese and Other              | 0.35 (0.04, 2.93)                                                                                                                                                                    | 0.2 (-0.75, 1.14)                           | 2.86 (0.43, 18.89) | 0.79 (-0.9, 2.48)                           | 2.35 (0.48, 11.47) | 0.73 (-2.9, 4.37)                           | 0.84 (0.16, 4.26) | 0.68 (-14.82, 16.17)                        |             |                                             |
| Unclassified                   | 2.88 (1.21, 6.88)                                                                                                                                                                    | 0.64 (-2.27, 3.54)                          | 0.29 (0.12, 0.71)  | 0.35 (-0.41, 1.12)                          | 0.75 (0.32, 1.77)  | 0.49 (-1.93, 2.91)                          | 1.09 (0.34, 3.42) | 0.72 (-15.8, 17.24)                         |             |                                             |

| <i>The proportion of people who have had a myocardial infarction and are have received a prescription for an ACE-inhibitor or angiotensin receptor blocker, anti-platelet therapy, beta-blocker and a statin in the preceding 12 months</i> |                               |                                                                    |                                                                    |                                                                |
|---------------------------------------------------------------------------------------------------------------------------------------------------------------------------------------------------------------------------------------------|-------------------------------|--------------------------------------------------------------------|--------------------------------------------------------------------|----------------------------------------------------------------|
| Indicator                                                                                                                                                                                                                                   | Group: Cardiovascular Disease |                                                                    |                                                                    |                                                                |
|                                                                                                                                                                                                                                             | Variable                      | Univariate                                                         |                                                                    | Multivariable                                                  |
|                                                                                                                                                                                                                                             |                               | Odds Ratio (OR) of satisfying 3 out of 4 classes of drugs (95% CI) | Odds Ratio (OR) of satisfying 3 out of 4 classes of drugs (95% CI) | Probability of satisfying 3 out of 4 classes of drugs (95% CI) |
| <b>Year</b>                                                                                                                                                                                                                                 |                               |                                                                    |                                                                    |                                                                |
|                                                                                                                                                                                                                                             | 2017/18 (comparator)          | 1.0                                                                | -                                                                  | 1.0                                                            |
|                                                                                                                                                                                                                                             | 2018/19                       | 1.04                                                               | (0.78, 1.38)                                                       | 1.25 (0.9, 1.72)                                               |
|                                                                                                                                                                                                                                             | 2019/20                       | 1.04                                                               | (0.79, 1.37)                                                       | 1.32 (0.96, 1.81)                                              |
| <b>Prison</b>                                                                                                                                                                                                                               |                               |                                                                    |                                                                    |                                                                |
|                                                                                                                                                                                                                                             | Prison 1                      | 0.73                                                               | (0.36, 1.47)                                                       | 0.58 (0.25, 1.33)                                              |
|                                                                                                                                                                                                                                             | Prison 2                      | 1.66                                                               | (1.07, 2.6)                                                        | 1.33 (0.77, 2.27)                                              |
|                                                                                                                                                                                                                                             | Prison 3                      | 1.11                                                               | (0.69, 1.79)                                                       | 0.72 (0.39, 1.32)                                              |
|                                                                                                                                                                                                                                             | Prison 4                      | 1.98                                                               | (1.3, 3.01)                                                        | 1.29 (0.73, 2.29)                                              |
|                                                                                                                                                                                                                                             | Prison 5                      | 1.21                                                               | (0.57, 2.57)                                                       | 0.85 (0.35, 2.08)                                              |
|                                                                                                                                                                                                                                             | Prison 6                      | 0.95                                                               | (0.57, 1.56)                                                       | 0.68 (0.35, 1.3)                                               |
|                                                                                                                                                                                                                                             | Prison 7                      | 0.73                                                               | (0.3, 1.75)                                                        | 299317.88 (0, 0)                                               |
|                                                                                                                                                                                                                                             | Prison 8                      | 0.59                                                               | (0.31, 1.11)                                                       | 145066.69 (0, 0)                                               |
|                                                                                                                                                                                                                                             | Prison 9                      | 1.99                                                               | (1.3, 3.03)                                                        | 1.15 (0.62, 2.13)                                              |
|                                                                                                                                                                                                                                             | Prison 10                     | 1.01                                                               | (0.64, 1.59)                                                       | 0.91 (0.52, 1.58)                                              |
|                                                                                                                                                                                                                                             | Prison 11 (comparator)        | 1.0                                                                | -                                                                  | 1.0                                                            |
|                                                                                                                                                                                                                                             | Prison 12                     | -                                                                  | -                                                                  | -                                                              |
|                                                                                                                                                                                                                                             | Prison 13                     | 1.84                                                               | (1.14, 2.98)                                                       | 0.97 (0.49, 1.89)                                              |
| <b>Prison category</b>                                                                                                                                                                                                                      |                               |                                                                    |                                                                    |                                                                |
|                                                                                                                                                                                                                                             | A (comparator)                | 1.0                                                                | -                                                                  | -                                                              |
|                                                                                                                                                                                                                                             | B                             | 0.61                                                               | (0.45, 0.82)                                                       | -                                                              |
|                                                                                                                                                                                                                                             | C                             | 0.75                                                               | (0.54, 1.04)                                                       | -                                                              |
|                                                                                                                                                                                                                                             | Closed                        | 0.33                                                               | (0.19, 0.55)                                                       | -                                                              |
|                                                                                                                                                                                                                                             | D                             | 0.52                                                               | (0.34, 0.8)                                                        | -                                                              |
|                                                                                                                                                                                                                                             | YOI                           | -                                                                  | -                                                                  | -                                                              |
| <b>Gender</b>                                                                                                                                                                                                                               |                               |                                                                    |                                                                    |                                                                |
|                                                                                                                                                                                                                                             | Female (comparator)           | 1.0                                                                | -                                                                  | -                                                              |
|                                                                                                                                                                                                                                             | Male                          | 2.10                                                               | (1.25, 3.53)                                                       | -                                                              |
| <b>Age - years</b>                                                                                                                                                                                                                          |                               |                                                                    |                                                                    |                                                                |
|                                                                                                                                                                                                                                             | 10 - <20                      | -                                                                  | -                                                                  | -                                                              |
|                                                                                                                                                                                                                                             | 20 - <30                      | 0.44                                                               | (0.09, 2.04)                                                       | 0.28 (0.03, 2.33)                                              |
|                                                                                                                                                                                                                                             | 30 - <40 (comparator)         | 1.0                                                                | -                                                                  | 1.0                                                            |
|                                                                                                                                                                                                                                             | 40 - <50                      | 3.67                                                               | (2, 6.72)                                                          | 4.41 (2.21, 8.79)                                              |
|                                                                                                                                                                                                                                             | 50 - <60                      | 6.77                                                               | (3.82, 12)                                                         | 7.58 (3.91, 14.72)                                             |
|                                                                                                                                                                                                                                             | 60 - <70                      | 7.66                                                               | (4.28, 13.7)                                                       | 6.87 (3.52, 13.43)                                             |
|                                                                                                                                                                                                                                             | 70 - <80                      | 5.29                                                               | (2.79, 10.04)                                                      | 5.03 (2.41, 10.46)                                             |
|                                                                                                                                                                                                                                             | 80 - <90                      | 5.79                                                               | (2.42, 13.85)                                                      | 4.87 (1.87, 12.68)                                             |
|                                                                                                                                                                                                                                             | 90 - <100                     | -                                                                  | -                                                                  | -                                                              |
|                                                                                                                                                                                                                                             | 100 - <110                    | -                                                                  | -                                                                  | -                                                              |
| <b>Length of Stay (months)</b>                                                                                                                                                                                                              |                               |                                                                    |                                                                    |                                                                |
|                                                                                                                                                                                                                                             | <1                            | 0.55                                                               | (0.37, 0.81)                                                       | 0.43 (0.27, 0.7)                                               |
|                                                                                                                                                                                                                                             | 1-<6 (comparator)             | 1.0                                                                | -                                                                  | 1.0                                                            |
|                                                                                                                                                                                                                                             | 6-<12                         | 0.90                                                               | (0.63, 1.28)                                                       | 1.03 (0.67, 1.58)                                              |
|                                                                                                                                                                                                                                             | 12-<24                        | 0.99                                                               | (0.69, 1.41)                                                       | 0.75 (0.48, 1.17)                                              |
|                                                                                                                                                                                                                                             | 24+                           | 1.76                                                               | (1.29, 2.39)                                                       | 1.15 (0.74, 1.8)                                               |
| <b>Ethnic Group</b>                                                                                                                                                                                                                         |                               |                                                                    |                                                                    |                                                                |
|                                                                                                                                                                                                                                             | White (comparator)            | 1.0                                                                | -                                                                  | 1.0                                                            |
|                                                                                                                                                                                                                                             | Mixed                         | 0.73                                                               | (0.27, 1.96)                                                       | 1.14 (0.36, 3.6)                                               |
|                                                                                                                                                                                                                                             | Asian or Asian British        | 0.83                                                               | (0.43, 1.59)                                                       | 1.18 (0.57, 2.44)                                              |
|                                                                                                                                                                                                                                             | Black or Black British        | 1.62                                                               | (0.63, 4.14)                                                       | 1.46 (0.54, 3.93)                                              |
|                                                                                                                                                                                                                                             | Chinese and Other             | 0.96                                                               | (0.24, 3.87)                                                       | 1.69 (0.34, 8.37)                                              |
|                                                                                                                                                                                                                                             | Unclassified                  | 1.44                                                               | (0.64, 3.24)                                                       | 1.08 (0.46, 2.58)                                              |

| Indicator                      | <i>The proportion of people with coronary heart disease who have received a prescription for anti-platelet or anti-coagulant therapy in the preceding 12 months</i> |                |               |              |                                    |                         |  |
|--------------------------------|---------------------------------------------------------------------------------------------------------------------------------------------------------------------|----------------|---------------|--------------|------------------------------------|-------------------------|--|
|                                | Group: Cardiovascular Disease                                                                                                                                       |                |               |              |                                    |                         |  |
| Variable                       | Univariate                                                                                                                                                          |                | Multivariable |              |                                    |                         |  |
|                                | Odds Ratio (OR) of achieving indicator                                                                                                                              | (95% CI) of OR | OR            | (95% CI)     | Probability of achieving indicator | (95% CI) of probability |  |
| <b>Year</b>                    |                                                                                                                                                                     |                |               |              |                                    |                         |  |
| 2017/18 (comparator)           | 1.0                                                                                                                                                                 | -              | 1.0           | -            | 0.73                               | (0.58, 0.87)            |  |
| 2018/19                        | 0.79                                                                                                                                                                | (0.57, 1.08)   | 0.94          | (0.65, 1.36) | 0.72                               | (0.57, 0.86)            |  |
| 2019/20                        | 0.91                                                                                                                                                                | (0.67, 1.24)   | 1.13          | (0.78, 1.64) | 0.74                               | (0.6, 0.89)             |  |
| <b>Prison</b>                  |                                                                                                                                                                     |                |               |              |                                    |                         |  |
| Prison 1                       | 1.16                                                                                                                                                                | (0.56, 2.39)   | 0.86          | (0.35, 2.08) | 0.70                               | (0.51, 0.89)            |  |
| Prison 2                       | 1.31                                                                                                                                                                | (0.81, 2.1)    | 0.97          | (0.54, 1.73) | 0.72                               | (0.57, 0.88)            |  |
| Prison 3                       | 1.54                                                                                                                                                                | (0.91, 2.59)   | 1.10          | (0.56, 2.16) | 0.75                               | (0.58, 0.91)            |  |
| Prison 4                       | 2.96                                                                                                                                                                | (1.82, 4.79)   | 2.10          | (1.07, 4.1)  | 0.84                               | (0.67, 1.003)           |  |
| Prison 5                       | 2.48                                                                                                                                                                | (0.97, 6.33)   | 1.14          | (0.37, 3.46) | 0.75                               | (0.54, 0.97)            |  |
| Prison 6                       | 1.32                                                                                                                                                                | (0.77, 2.26)   | 0.88          | (0.43, 1.79) | 0.71                               | (0.54, 0.87)            |  |
| Prison 7                       | 0.55                                                                                                                                                                | (0.24, 1.3)    | 0.00          | (0, 0)       | 0.02                               | (0.01, 0.04)            |  |
| Prison 8                       | 0.55                                                                                                                                                                | (0.3, 1.01)    | 0.00          | (0, 0)       | 0.03                               | (0.02, 0.04)            |  |
| Prison 9                       | 2.43                                                                                                                                                                | (1.49, 3.96)   | 1.38          | (0.68, 2.81) | 0.78                               | (0.62, 0.94)            |  |
| Prison 10                      | 1.03                                                                                                                                                                | (0.65, 1.66)   | 0.93          | (0.51, 1.69) | 0.72                               | (0.56, 0.88)            |  |
| Prison 11 (comparator)         | 1.0                                                                                                                                                                 | -              | 1.0           | -            | 0.73                               | (0.57, 0.89)            |  |
| Prison 12                      | 0.63                                                                                                                                                                | (0.04, 10.24)  | 1.86          | (0.1, 36.06) | 0.82                               | (0.42, 1.22)            |  |
| Prison 13                      | 2.27                                                                                                                                                                | (1.31, 3.96)   | 1.48          | (0.67, 3.23) | 0.79                               | (0.62, 0.96)            |  |
| <b>Prison category</b>         |                                                                                                                                                                     |                |               |              |                                    |                         |  |
| A (comparator)                 | 1.0                                                                                                                                                                 | -              |               |              |                                    |                         |  |
| B                              | 0.46                                                                                                                                                                | (0.32, 0.66)   |               |              |                                    |                         |  |
| C                              | 0.88                                                                                                                                                                | (0.59, 1.3)    |               |              |                                    |                         |  |
| Closed                         | 0.23                                                                                                                                                                | (0.14, 0.4)    |               |              |                                    |                         |  |
| D                              | 0.64                                                                                                                                                                | (0.39, 1.05)   |               |              |                                    |                         |  |
| YOI                            | 0.26                                                                                                                                                                | (0.02, 4.29)   |               |              |                                    |                         |  |
| <b>Gender</b>                  |                                                                                                                                                                     |                |               |              |                                    |                         |  |
| Female (comparator)            | 1.0                                                                                                                                                                 | -              | 1.0           | -            | 0.97                               | (0.79, 1.16)            |  |
| Male                           | 2.78                                                                                                                                                                | (1.69, 4.58)   | -             | -            | 0.70                               | (0.57, 0.83)            |  |
| <b>Age - years</b>             |                                                                                                                                                                     |                |               |              |                                    |                         |  |
| 10 - <20                       | -                                                                                                                                                                   | -              | -             | -            | -                                  | -                       |  |
| 20 - <30                       | 0.17                                                                                                                                                                | (0.07, 0.4)    | 0.15          | (0.05, 0.4)  | 0.38                               | (0.16, 0.61)            |  |
| 30 - <40                       | 0.11                                                                                                                                                                | (0.07, 0.18)   | 0.11          | (0.06, 0.19) | 0.32                               | (0.19, 0.44)            |  |
| 40 - <50                       | 0.36                                                                                                                                                                | (0.25, 0.51)   | 0.40          | (0.26, 0.6)  | 0.62                               | (0.48, 0.75)            |  |
| 50 - <60 (comparator)          | 1.0                                                                                                                                                                 | -              | 1.0           | -            | 0.79                               | (0.64, 0.95)            |  |
| 60 - <70                       | 1.27                                                                                                                                                                | (0.89, 1.8)    | 1.06          | (0.71, 1.58) | 0.80                               | (0.64, 0.96)            |  |
| 70 - <80                       | 1.66                                                                                                                                                                | (0.97, 2.84)   | 1.14          | (0.64, 2.01) | 0.81                               | (0.64, 0.98)            |  |
| 80 - <90                       | 2.82                                                                                                                                                                | (0.84, 9.46)   | 2.33          | (0.67, 8.09) | 0.90                               | (0.69, 1.1)             |  |
| 90 - <100                      | -                                                                                                                                                                   | -              | -             | -            | -                                  | -                       |  |
| 100 - <110                     | -                                                                                                                                                                   | -              | -             | -            | -                                  | -                       |  |
| <b>Length of Stay (months)</b> |                                                                                                                                                                     |                |               |              |                                    |                         |  |
| <1                             | 0.50                                                                                                                                                                | (0.34, 0.74)   | 0.41          | (0.25, 0.67) | 0.57                               | (0.43, 0.72)            |  |
| 1-<6 (comparator)              | 1.0                                                                                                                                                                 | -              | 1.0           | -            | 0.74                               | (0.59, 0.89)            |  |
| 6-<12                          | 1.36                                                                                                                                                                | (0.92, 2)      | 1.47          | (0.89, 2.44) | 0.80                               | (0.64, 0.96)            |  |
| 12-<24                         | 1.69                                                                                                                                                                | (1.13, 2.54)   | 1.01          | (0.61, 1.68) | 0.75                               | (0.59, 0.9)             |  |
| 24+                            | 2.03                                                                                                                                                                | (1.43, 2.87)   | 0.92          | (0.54, 1.55) | 0.73                               | (0.58, 0.88)            |  |
| <b>Ethnic Group</b>            |                                                                                                                                                                     |                |               |              |                                    |                         |  |
| White (comparator)             | 1.0                                                                                                                                                                 | -              | 1.0           | -            | 0.74                               | (0.6, 0.88)             |  |
| Mixed                          | 0.36                                                                                                                                                                | (0.13, 0.96)   | 0.63          | (0.19, 2.09) | 0.66                               | (0.4, 0.91)             |  |
| Asian or Asian British         | 0.41                                                                                                                                                                | (0.21, 0.78)   | 0.61          | (0.29, 1.27) | 0.65                               | (0.47, 0.84)            |  |
| Black or Black British         | 0.60                                                                                                                                                                | (0.23, 1.53)   | 0.56          | (0.2, 1.58)  | 0.64                               | (0.4, 0.87)             |  |
| Chinese and Other              | 0.57                                                                                                                                                                | (0.13, 2.41)   | 1.40          | (0.26, 7.58) | 0.79                               | (0.51, 1.07)            |  |
| Unclassified                   | 0.73                                                                                                                                                                | (0.31, 1.72)   | 0.39          | (0.15, 1.02) | 0.56                               | (0.34, 0.78)            |  |

| Indicator                      | <i>In those patients with a current diagnosis of heart failure due to left ventricular systolic dysfunction, the percentage of patients who are currently treated with an ACE-I or ARB (Inherited)</i> |                |               |               |                                    |                         |  |
|--------------------------------|--------------------------------------------------------------------------------------------------------------------------------------------------------------------------------------------------------|----------------|---------------|---------------|------------------------------------|-------------------------|--|
|                                | Group: Cardiovascular Disease                                                                                                                                                                          |                |               |               |                                    |                         |  |
| Variable                       | Univariate                                                                                                                                                                                             |                | Multivariable |               |                                    |                         |  |
|                                | Odds Ratio (OR) of achieving indicator                                                                                                                                                                 | (95% CI) of OR | OR            | (95% CI)      | Probability of achieving indicator | (95% CI) of probability |  |
| <b>Year</b>                    |                                                                                                                                                                                                        |                |               |               |                                    |                         |  |
| 2017/18 (comparator)           | 1.0                                                                                                                                                                                                    | -              | 1.0           | -             | 0.82                               | (-123, 124.64)          |  |
| 2018/19                        | 0.74                                                                                                                                                                                                   | (0.34, 1.58)   | 0.57          | (0.21, 1.52)  | 0.73                               | (-109.72, 111.18)       |  |
| 2019/20                        | 0.56                                                                                                                                                                                                   | (0.28, 1.15)   | 0.32          | (0.12, 0.82)  | 0.62                               | (-93.07, 94.31)         |  |
| <b>Prison</b>                  |                                                                                                                                                                                                        |                |               |               |                                    |                         |  |
| Prison 1                       | -                                                                                                                                                                                                      | -              | -             | -             | -                                  | -                       |  |
| Prison 2                       | 1.78                                                                                                                                                                                                   | (0.5, 6.34)    | 1.53          | (0.33, 7.13)  | -                                  | -                       |  |
| Prison 3                       | 2.57                                                                                                                                                                                                   | (0.91, 7.26)   | 1.58          | (0.4, 6.24)   | -                                  | -                       |  |
| Prison 4                       | 1.85                                                                                                                                                                                                   | (0.7, 4.89)    | 1.39          | (0.31, 6.21)  | -                                  | -                       |  |
| Prison 5                       | 6.55                                                                                                                                                                                                   | (0.74, 58.08)  | 3.46          | (0.31, 38.63) | -                                  | -                       |  |
| Prison 6                       | 2.56                                                                                                                                                                                                   | (0.45, 14.58)  | 1.23          | (0.15, 10.07) | -                                  | -                       |  |
| Prison 7                       | 0.22                                                                                                                                                                                                   | (0.02, 2.24)   | -             | -             | -                                  | -                       |  |
| Prison 8                       | 0.35                                                                                                                                                                                                   | (0.07, 1.7)    | 0.60          | (0.05, 6.99)  | -                                  | -                       |  |
| Prison 9                       | 2.09                                                                                                                                                                                                   | (0.64, 6.84)   | 1.24          | (0.22, 6.82)  | -                                  | -                       |  |
| Prison 10                      | 3.75                                                                                                                                                                                                   | (1.01, 13.88)  | 3.94          | (0.78, 19.86) | -                                  | -                       |  |
| Prison 11 (comparator)         | 1.0                                                                                                                                                                                                    | -              | 1.0           | -             | -                                  | -                       |  |
| Prison 12                      | -                                                                                                                                                                                                      | -              | -             | -             | -                                  | -                       |  |
| Prison 13                      | -                                                                                                                                                                                                      | -              | -             | -             | -                                  | -                       |  |
| <b>Prison category</b>         |                                                                                                                                                                                                        |                |               |               |                                    |                         |  |
| A (comparator)                 | 1.0                                                                                                                                                                                                    | -              | -             | -             | -                                  | -                       |  |
| B                              | 2.36                                                                                                                                                                                                   | (1.02, 5.49)   | -             | -             | -                                  | -                       |  |
| C                              | 3.21                                                                                                                                                                                                   | (1.4, 7.36)    | -             | -             | -                                  | -                       |  |
| Closed                         | 0.42                                                                                                                                                                                                   | (0.11, 1.63)   | -             | -             | -                                  | -                       |  |
| D                              | 5.74                                                                                                                                                                                                   | (1.42, 23.28)  | -             | -             | -                                  | -                       |  |
| YOI                            | -                                                                                                                                                                                                      | -              | -             | -             | -                                  | -                       |  |
| <b>Gender</b>                  |                                                                                                                                                                                                        |                |               |               |                                    |                         |  |
| Female (comparator)            | 1.0                                                                                                                                                                                                    | -              | -             | -             | -                                  | -                       |  |
| Male                           | 3.01                                                                                                                                                                                                   | (0.65, 13.94)  | -             | -             | -                                  | -                       |  |
| <b>Age - years</b>             |                                                                                                                                                                                                        |                |               |               |                                    |                         |  |
| 10 - <20                       | -                                                                                                                                                                                                      | -              | -             | -             | -                                  | -                       |  |
| 20 - <30                       | 0.43                                                                                                                                                                                                   | (0.11, 1.77)   | 0.79          | (0.13, 4.78)  | 0.74                               | (-110.66, 112.13)       |  |
| 30 - <40                       | 0.54                                                                                                                                                                                                   | (0.17, 1.72)   | 0.63          | (0.16, 2.53)  | 0.70                               | (-104.79, 106.19)       |  |
| 40 - <50                       | 0.39                                                                                                                                                                                                   | (0.16, 0.96)   | 0.47          | (0.13, 1.68)  | 0.64                               | (-96.48, 97.77)         |  |
| 50 - <60 (comparator)          | 1.0                                                                                                                                                                                                    | -              | 1.0           | -             | 0.78                               | (-116.6, 118.15)        |  |
| 60 - <70                       | 0.53                                                                                                                                                                                                   | (0.23, 1.22)   | 0.82          | (0.26, 2.54)  | 0.74                               | (-111.71, 113.19)       |  |
| 70 - <80                       | 0.59                                                                                                                                                                                                   | (0.24, 1.43)   | 0.51          | (0.17, 1.53)  | 0.66                               | (-98.85, 100.17)        |  |
| 80 - <90                       | 0.72                                                                                                                                                                                                   | (0.16, 3.18)   | 0.68          | (0.12, 3.78)  | 0.71                               | (-107.01, 108.43)       |  |
| 90 - <100                      | -                                                                                                                                                                                                      | -              | -             | -             | -                                  | -                       |  |
| 100 - <110                     | -                                                                                                                                                                                                      | -              | -             | -             | -                                  | -                       |  |
| <b>Length of Stay (months)</b> |                                                                                                                                                                                                        |                |               |               |                                    |                         |  |
| <1                             | 3.20                                                                                                                                                                                                   | (0.94, 10.87)  | 3.80          | (0.91, 15.79) | 0.80                               | (-119.59, 121.19)       |  |
| 1-<6 (comparator)              | 1.0                                                                                                                                                                                                    | -              | 1.0           | -             | 0.53                               | (-80.28, 81.34)         |  |
| 6-<12                          | 3.06                                                                                                                                                                                                   | (1.22, 7.65)   | 2.29          | (0.65, 8.08)  | 0.71                               | (-106.57, 107.99)       |  |
| 12-<24                         | 3.87                                                                                                                                                                                                   | (1.57, 9.55)   | 4.72          | (1.33, 16.78) | 0.83                               | (-124.31, 125.96)       |  |
| 24+                            | 1.29                                                                                                                                                                                                   | (0.63, 2.67)   | 2.64          | (0.68, 10.21) | 0.74                               | (-110.52, 111.99)       |  |

| Indicator                      | <i>In those patients with a current diagnosis of heart failure due to left ventricular systolic dysfunction who are currently treated with an ACE-I or ARB, the percentage of patients who are additionally currently treated with a beta-blocker licensed for heart failure</i> |                |       |                |                                    |                         |  |
|--------------------------------|----------------------------------------------------------------------------------------------------------------------------------------------------------------------------------------------------------------------------------------------------------------------------------|----------------|-------|----------------|------------------------------------|-------------------------|--|
|                                | Group: Cardiovascular Disease                                                                                                                                                                                                                                                    |                |       |                |                                    |                         |  |
|                                | Univariate                                                                                                                                                                                                                                                                       |                |       | Multivariable  |                                    |                         |  |
| Variable                       | Odds Ratio (OR) of achieving indicator                                                                                                                                                                                                                                           | (95% CI) of OR | OR    | (95% CI)       | Probability of achieving indicator | (95% CI) of probability |  |
| <b>Year</b>                    |                                                                                                                                                                                                                                                                                  |                |       |                |                                    |                         |  |
| 2017/18 (comparator)           | 1.0                                                                                                                                                                                                                                                                              | -              | 1.0   | -              | 0.79                               | (0.65, 0.94)            |  |
| 2018/19                        | 1.17                                                                                                                                                                                                                                                                             | (0.4, 3.42)    | 1.20  | (0.35, 4.07)   | 0.82                               | (0.68, 0.95)            |  |
| 2019/20                        | 0.91                                                                                                                                                                                                                                                                             | (0.34, 2.45)   | 0.87  | (0.27, 2.76)   | 0.77                               | (0.64, 0.9)             |  |
| <b>Prison</b>                  |                                                                                                                                                                                                                                                                                  |                |       |                |                                    |                         |  |
| Prison 1                       | -                                                                                                                                                                                                                                                                                | -              | -     | -              |                                    |                         |  |
| Prison 2                       | 1.91                                                                                                                                                                                                                                                                             | (0.3, 12.04)   | 3.21  | (0.36, 28.6)   | 0.75                               | (0.44, 1.05)            |  |
| Prison 3                       | 0.61                                                                                                                                                                                                                                                                             | (0.17, 2.17)   | 1.91  | (0.32, 11.43)  | 0.65                               | (0.47, 0.83)            |  |
| Prison 4                       | 2.71                                                                                                                                                                                                                                                                             | (0.62, 11.83)  | 10.02 | (1.29, 77.82)  | 0.89                               | (0.76, 1.03)            |  |
| Prison 5                       | 3.39                                                                                                                                                                                                                                                                             | (0.34, 34.08)  | 7.82  | (0.58, 106.26) | 0.87                               | (0.62, 1.13)            |  |
| Prison 6                       | -                                                                                                                                                                                                                                                                                | -              | -     | -              |                                    |                         |  |
| Prison 7                       | -                                                                                                                                                                                                                                                                                | -              | -     | -              |                                    |                         |  |
| Prison 8                       | -                                                                                                                                                                                                                                                                                | -              | -     | -              |                                    |                         |  |
| Prison 9                       | 2.70                                                                                                                                                                                                                                                                             | (0.44, 16.4)   | 15.51 | (1.36, 176.33) | 0.93                               | (0.8, 1.06)             |  |
| Prison 10                      | 1.96                                                                                                                                                                                                                                                                             | (0.39, 9.92)   | 4.41  | (0.66, 29.35)  | 0.80                               | (0.56, 1.03)            |  |
| Prison 11 (comparator)         | 1.0                                                                                                                                                                                                                                                                              | -              | 1.0   | -              | 0.51                               | (0.2, 0.82)             |  |
| Prison 12                      | -                                                                                                                                                                                                                                                                                | -              | -     | -              |                                    |                         |  |
| Prison 13                      | -                                                                                                                                                                                                                                                                                | -              | -     | -              |                                    |                         |  |
| <b>Prison category</b>         |                                                                                                                                                                                                                                                                                  |                |       |                |                                    |                         |  |
| A (comparator)                 | 1.0                                                                                                                                                                                                                                                                              | -              |       |                |                                    |                         |  |
| B                              | 0.55                                                                                                                                                                                                                                                                             | (0.11, 2.79)   |       |                |                                    |                         |  |
| C                              | 0.45                                                                                                                                                                                                                                                                             | (0.09, 2.21)   |       |                |                                    |                         |  |
| Closed                         | -                                                                                                                                                                                                                                                                                | -              |       |                |                                    |                         |  |
| D                              | 1.94                                                                                                                                                                                                                                                                             | (0.16, 23.93)  |       |                |                                    |                         |  |
| YOI                            | -                                                                                                                                                                                                                                                                                | -              |       |                |                                    |                         |  |
| <b>Gender</b>                  |                                                                                                                                                                                                                                                                                  |                |       |                |                                    |                         |  |
| Female (comparator)            | -                                                                                                                                                                                                                                                                                | -              | -     | -              |                                    |                         |  |
| Male                           | -                                                                                                                                                                                                                                                                                | -              | -     | -              | 0.79                               | (0.69, 0.89)            |  |
| <b>Age - years</b>             |                                                                                                                                                                                                                                                                                  |                |       |                |                                    |                         |  |
| 10 - <20                       | -                                                                                                                                                                                                                                                                                | -              | -     | -              |                                    |                         |  |
| 20 - <30                       | 0.53                                                                                                                                                                                                                                                                             | (0.08, 3.35)   | 0.93  | (0.11, 7.91)   | 0.73                               | (0.38, 1.08)            |  |
| 30 - <40                       | -                                                                                                                                                                                                                                                                                | -              | -     | -              |                                    |                         |  |
| 40 - <50                       | 1.57                                                                                                                                                                                                                                                                             | (0.39, 6.38)   | 2.21  | (0.42, 11.49)  | 0.85                               | (0.67, 1.03)            |  |
| 50 - <60 (comparator)          | 1.0                                                                                                                                                                                                                                                                              | -              | 1.0   | -              | 0.74                               | (0.59, 0.89)            |  |
| 60 - <70                       | 1.50                                                                                                                                                                                                                                                                             | (0.46, 4.86)   | 1.55  | (0.37, 6.39)   | 0.81                               | (0.63, 0.98)            |  |
| 70 - <80                       | 1.07                                                                                                                                                                                                                                                                             | (0.35, 3.3)    | 1.67  | (0.44, 6.35)   | 0.82                               | (0.66, 0.97)            |  |
| 80 - <90                       | 1.39                                                                                                                                                                                                                                                                             | (0.14, 13.53)  | 2.05  | (0.18, 23.38)  | 0.84                               | (0.56, 1.12)            |  |
| 90 - <100                      | -                                                                                                                                                                                                                                                                                | -              | -     | -              |                                    |                         |  |
| 100 - <110                     | -                                                                                                                                                                                                                                                                                | -              | -     | -              |                                    |                         |  |
| <b>Length of Stay (months)</b> |                                                                                                                                                                                                                                                                                  |                |       |                |                                    |                         |  |
| <1                             | 0.28                                                                                                                                                                                                                                                                             | (0.05, 1.48)   | 0.27  | (0.03, 2.1)    | 0.77                               | (0.52, 1.02)            |  |
| 1-<6 (comparator)              | 1.0                                                                                                                                                                                                                                                                              | -              | 1.0   | -              | 0.92                               | (0.78, 1.05)            |  |
| 6-<12                          | 0.72                                                                                                                                                                                                                                                                             | (0.15, 3.57)   | 0.40  | (0.06, 2.8)    | 0.82                               | (0.65, 1)               |  |
| 12-<24                         | 0.60                                                                                                                                                                                                                                                                             | (0.14, 2.65)   | 0.33  | (0.05, 2.19)   | 0.80                               | (0.64, 0.96)            |  |
| 24+                            | 0.32                                                                                                                                                                                                                                                                             | (0.08, 1.25)   | 0.14  | (0.02, 1.06)   | 0.65                               | (0.45, 0.86)            |  |
| <b>Ethnic Group</b>            |                                                                                                                                                                                                                                                                                  |                |       |                |                                    |                         |  |
| White (comparator)             | -                                                                                                                                                                                                                                                                                | -              |       |                |                                    |                         |  |
| Mixed                          | -                                                                                                                                                                                                                                                                                | -              |       |                |                                    |                         |  |
| Asian or Asian British         | -                                                                                                                                                                                                                                                                                | -              |       |                |                                    |                         |  |
| Black or Black British         | -                                                                                                                                                                                                                                                                                | -              |       |                |                                    |                         |  |
| Chinese and Other              | -                                                                                                                                                                                                                                                                                | -              |       |                |                                    |                         |  |
| Unclassified                   | -                                                                                                                                                                                                                                                                                | -              |       |                |                                    |                         |  |

| Indicator                              | <i>The proportion of women eligible for screening and aged 25-49 years who have had cervical screening in the preceding five years and six months</i> |                |              |               |                                    |                         |               |
|----------------------------------------|-------------------------------------------------------------------------------------------------------------------------------------------------------|----------------|--------------|---------------|------------------------------------|-------------------------|---------------|
|                                        | Group: Screening                                                                                                                                      |                |              |               |                                    |                         |               |
|                                        | Variable                                                                                                                                              | Univariate     |              | Multivariable |                                    |                         |               |
| Odds Ratio (OR) of achieving indicator |                                                                                                                                                       | (95% CI) of OR | OR           | (95% CI)      | Probability of achieving indicator | (95% CI) of probability |               |
| <b>Year</b>                            |                                                                                                                                                       |                |              |               |                                    |                         |               |
|                                        | 2017/18 (comparator)                                                                                                                                  | 1.0            | -            | 1.0           | -                                  | 0.56                    | (-2.31, 3.43) |
|                                        | 2018/19                                                                                                                                               | 1.50           | (1.28, 1.75) | 1.61          | (1.36, 1.91)                       | 0.67                    | (-2.74, 4.08) |
|                                        | 2019/20                                                                                                                                               | 1.41           | (1.22, 1.63) | 1.61          | (1.37, 1.89)                       | 0.67                    | (-2.74, 4.08) |
| <b>Prison</b>                          |                                                                                                                                                       |                |              |               |                                    |                         |               |
|                                        | Prison 1                                                                                                                                              | -              | -            | -             | -                                  | -                       | -             |
|                                        | Prison 2                                                                                                                                              | -              | -            | -             | -                                  | -                       | -             |
|                                        | Prison 3                                                                                                                                              | -              | -            | -             | -                                  | -                       | -             |
|                                        | Prison 4                                                                                                                                              | -              | -            | -             | -                                  | -                       | -             |
|                                        | Prison 5                                                                                                                                              | -              | -            | -             | -                                  | -                       | -             |
|                                        | Prison 6                                                                                                                                              | -              | -            | -             | -                                  | -                       | -             |
|                                        | Prison 7 (comparator)                                                                                                                                 | 1.0            | -            | 1.0           | -                                  | 0.61                    | (-2.51, 3.73) |
|                                        | Prison 8                                                                                                                                              | 1.08           | (0.95, 1.22) | 1.20          | (1.05, 1.38)                       | 0.65                    | (-2.68, 3.98) |
|                                        | Prison 9                                                                                                                                              | -              | -            | -             | -                                  | -                       | -             |
|                                        | Prison 10                                                                                                                                             | -              | -            | -             | -                                  | -                       | -             |
|                                        | Prison 11                                                                                                                                             | -              | -            | -             | -                                  | -                       | -             |
|                                        | Prison 12                                                                                                                                             | -              | -            | -             | -                                  | -                       | -             |
|                                        | Prison 13                                                                                                                                             | -              | -            | -             | -                                  | -                       | -             |
| <b>Prison category</b>                 |                                                                                                                                                       |                |              |               |                                    |                         |               |
|                                        | A (comparator)                                                                                                                                        | -              | -            | -             | -                                  | -                       | -             |
|                                        | B                                                                                                                                                     | -              | -            | -             | -                                  | -                       | -             |
|                                        | C                                                                                                                                                     | -              | -            | -             | -                                  | -                       | -             |
|                                        | Closed                                                                                                                                                | -              | -            | -             | -                                  | -                       | -             |
|                                        | D                                                                                                                                                     | -              | -            | -             | -                                  | -                       | -             |
|                                        | YOI                                                                                                                                                   | -              | -            | -             | -                                  | -                       | -             |
| <b>Gender</b>                          |                                                                                                                                                       |                |              |               |                                    |                         |               |
|                                        | Female (comparator)                                                                                                                                   | -              | -            | -             | -                                  | -                       | -             |
|                                        | Male                                                                                                                                                  | -              | -            | -             | -                                  | -                       | -             |
| <b>Age - years</b>                     |                                                                                                                                                       |                |              |               |                                    |                         |               |
|                                        | 10 - <20                                                                                                                                              | -              | -            | -             | -                                  | -                       | -             |
|                                        | 20 - <30                                                                                                                                              | 0.61           | (0.52, 0.73) | 0.6           | (0.47, 0.68)                       | 0.55                    | (-2.24, 3.33) |
|                                        | 30 - <40 (comparator)                                                                                                                                 | 1.0            | -            | 1.0           | -                                  | 0.67                    | (-2.76, 4.1)  |
|                                        | 40 - <50                                                                                                                                              | 0.92           | (0.8, 1.06)  | 0.8           | (0.72, 0.97)                       | 0.63                    | (-2.6, 3.87)  |
|                                        | 50 - <60                                                                                                                                              | 0.76           | (0.5, 1.17)  | 0.8           | (0.47, 1.2)                        | 0.61                    | (-2.5, 3.72)  |
|                                        | 60 - <70                                                                                                                                              | -              | -            | -             | -                                  | -                       | -             |
|                                        | 70 - <80                                                                                                                                              | -              | -            | -             | -                                  | -                       | -             |
|                                        | 80 - <90                                                                                                                                              | -              | -            | -             | -                                  | -                       | -             |
|                                        | 90 - <100                                                                                                                                             | -              | -            | -             | -                                  | -                       | -             |
|                                        | 100 - <110                                                                                                                                            | -              | -            | -             | -                                  | -                       | -             |
| <b>Length of Stay (months)</b>         |                                                                                                                                                       |                |              |               |                                    |                         |               |
|                                        | <1                                                                                                                                                    | 0.67           | (0.58, 0.78) | 0.7           | (0.56, 0.78)                       | 0.51                    | (-2.07, 3.08) |
|                                        | 1-<6 (comparator)                                                                                                                                     | 1.0            | -            | 1.0           | -                                  | 0.60                    | (-2.47, 3.68) |
|                                        | 6-<12                                                                                                                                                 | 1.84           | (1.52, 2.22) | 1.9           | (1.52, 2.29)                       | 0.74                    | (-3.02, 4.49) |
|                                        | 12-<24                                                                                                                                                | 2.21           | (1.77, 2.77) | 2.0           | (1.61, 2.58)                       | 0.75                    | (-3.09, 4.6)  |
|                                        | 24+                                                                                                                                                   | 2.62           | (2.02, 3.4)  | 2.6           | (1.97, 3.43)                       | 0.79                    | (-3.26, 4.85) |
| <b>Ethnic Group</b>                    |                                                                                                                                                       |                |              |               |                                    |                         |               |
|                                        | White (comparator)                                                                                                                                    | 1.0            | -            | 1.0           | -                                  | 0.64                    | (-2.62, 3.9)  |
|                                        | Mixed                                                                                                                                                 | 1.21           | (0.78, 1.88) | 1.1           | (0.72, 1.8)                        | 0.67                    | (-2.74, 4.07) |
|                                        | Asian or Asian British                                                                                                                                | 0.70           | (0.43, 1.16) | 0.6           | (0.36, 1.02)                       | 0.53                    | (-2.16, 3.22) |
|                                        | Black or Black British                                                                                                                                | 1.22           | (0.76, 1.96) | 1.4           | (0.84, 2.28)                       | 0.71                    | (-2.9, 4.31)  |
|                                        | Chinese and Other                                                                                                                                     | 0.53           | (0.32, 0.9)  | 0.6           | (0.33, 0.95)                       | 0.51                    | (-2.09, 3.1)  |
|                                        | Unclassified                                                                                                                                          | 0.52           | (0.23, 1.14) | 0.7           | (0.29, 1.46)                       | 0.54                    | (-2.23, 3.32) |



| Indicator                              | <i>The proportion of women eligible for screening and aged 50-64 years who have had cervical screening in the preceding five years and six months</i> |                |               |               |                                    |                         |                 |
|----------------------------------------|-------------------------------------------------------------------------------------------------------------------------------------------------------|----------------|---------------|---------------|------------------------------------|-------------------------|-----------------|
|                                        | Group: Screening                                                                                                                                      |                |               |               |                                    |                         |                 |
|                                        | Variable                                                                                                                                              | Univariate     |               | Multivariable |                                    |                         |                 |
| Odds Ratio (OR) of achieving indicator |                                                                                                                                                       | (95% CI) of OR | OR            | (95% CI)      | Probability of achieving indicator | (95% CI) of probability |                 |
| <b>Year</b>                            |                                                                                                                                                       |                |               |               |                                    |                         |                 |
|                                        | 2017/18 (comparator)                                                                                                                                  | 1.0            | -             | 1.0           | -                                  | 0.55                    | (-20.54, 21.64) |
|                                        | 2018/19                                                                                                                                               | 1.10           | (0.76, 1.59)  | 1.18          | (0.8, 1.74)                        | 0.59                    | (-21.99, 23.17) |
|                                        | 2019/20                                                                                                                                               | 1.33           | (0.92, 1.92)  | 1.50          | (1.01, 2.24)                       | 0.65                    | (-24.11, 25.4)  |
| <b>Prison</b>                          |                                                                                                                                                       |                |               |               |                                    |                         |                 |
|                                        | Prison 1                                                                                                                                              | -              | -             | -             | -                                  |                         |                 |
|                                        | Prison 2                                                                                                                                              | -              | -             | -             | -                                  |                         |                 |
|                                        | Prison 3                                                                                                                                              | -              | -             | -             | -                                  |                         |                 |
|                                        | Prison 4                                                                                                                                              | -              | -             | -             | -                                  |                         |                 |
|                                        | Prison 5                                                                                                                                              | -              | -             | -             | -                                  |                         |                 |
|                                        | Prison 6                                                                                                                                              | -              | -             | -             | -                                  |                         |                 |
|                                        | Prison 7                                                                                                                                              | 1.0            | -             | 1.0           | -                                  | 0.60                    | (-22.53, 23.74) |
|                                        | Prison 8                                                                                                                                              | 1.04           | (0.76, 1.42)  | 0.96          | (0.68, 1.35)                       | 0.59                    | (-22.16, 23.35) |
|                                        | Prison 9                                                                                                                                              | -              | -             | -             | -                                  |                         |                 |
|                                        | Prison 10                                                                                                                                             | -              | -             | -             | -                                  |                         |                 |
|                                        | Prison 11 (comparator)                                                                                                                                | -              | -             | -             | -                                  |                         |                 |
|                                        | Prison 12                                                                                                                                             | -              | -             | -             | -                                  |                         |                 |
|                                        | Prison 13                                                                                                                                             | -              | -             | -             | -                                  |                         |                 |
| <b>Prison category</b>                 |                                                                                                                                                       |                |               |               |                                    |                         |                 |
|                                        | A (comparator)                                                                                                                                        | -              | -             | -             | -                                  |                         |                 |
|                                        | B                                                                                                                                                     | -              | -             | -             | -                                  |                         |                 |
|                                        | C                                                                                                                                                     | -              | -             | -             | -                                  |                         |                 |
|                                        | Closed                                                                                                                                                | -              | -             | -             | -                                  |                         |                 |
|                                        | D                                                                                                                                                     | -              | -             | -             | -                                  |                         |                 |
|                                        | YOI                                                                                                                                                   | -              | -             | -             | -                                  |                         |                 |
| <b>Gender</b>                          |                                                                                                                                                       |                |               |               |                                    |                         |                 |
|                                        | Female (comparator)                                                                                                                                   | -              | -             | -             | -                                  |                         |                 |
|                                        | Male                                                                                                                                                  | -              | -             | -             | -                                  |                         |                 |
| <b>Age - years</b>                     |                                                                                                                                                       |                |               |               |                                    |                         |                 |
|                                        | 10 - <20                                                                                                                                              | -              | -             | -             | -                                  |                         |                 |
|                                        | 20 - <30                                                                                                                                              | -              | -             | -             | -                                  |                         |                 |
|                                        | 30 - <40                                                                                                                                              | -              | -             | -             | -                                  |                         |                 |
|                                        | 40 - <50                                                                                                                                              | -              | -             | -             | -                                  |                         |                 |
|                                        | 50 - <60 (comparator)                                                                                                                                 | 1.0            | -             | 1.0           | -                                  | 0.61                    | (-22.76, 23.98) |
|                                        | 60 - <70                                                                                                                                              | 0.75           | (0.5, 1.14)   | 0.7           | (0.45, 1.1)                        | 0.53                    | (-19.64, 20.69) |
|                                        | 70 - <80                                                                                                                                              | -              | -             | -             | -                                  |                         |                 |
|                                        | 80 - <90                                                                                                                                              | -              | -             | -             | -                                  |                         |                 |
|                                        | 90 - <100                                                                                                                                             | -              | -             | -             | -                                  |                         |                 |
|                                        | 100 - <110                                                                                                                                            | -              | -             | -             | -                                  |                         |                 |
| <b>Length of Stay (months)</b>         |                                                                                                                                                       |                |               |               |                                    |                         |                 |
|                                        | <1                                                                                                                                                    | 0.70           | (0.46, 1.07)  | 0.7           | (0.42, 1.04)                       | 0.50                    | (-18.68, 19.68) |
|                                        | 1-<6 (comparator)                                                                                                                                     | 1.0            | -             | 1.0           | -                                  | 0.60                    | (-22.47, 23.68) |
|                                        | 6-<12                                                                                                                                                 | 1.08           | (0.71, 1.65)  | 1.0           | (0.66, 1.64)                       | 0.61                    | (-22.8, 24.03)  |
|                                        | 12-<24                                                                                                                                                | 1.05           | (0.57, 1.95)  | 0.9           | (0.45, 1.64)                       | 0.56                    | (-21.06, 22.19) |
|                                        | 24+                                                                                                                                                   | 1.46           | (0.94, 2.25)  | 1.4           | (0.85, 2.14)                       | 0.67                    | (-25.01, 26.35) |
| <b>Ethnic Group</b>                    |                                                                                                                                                       |                |               |               |                                    |                         |                 |
|                                        | White (comparator)                                                                                                                                    | 1.0            | -             | 1.0           | -                                  | 0.60                    | (-22.26, 23.45) |
|                                        | Mixed                                                                                                                                                 | 0.53           | (0.16, 1.76)  | 0.6           | (0.17, 2.2)                        | 0.48                    | (-17.87, 18.83) |
|                                        | Asian or Asian British                                                                                                                                | 2.76           | (0.58, 13.17) | 2.6           | (0.53, 12.4)                       | 0.79                    | (-29.42, 31)    |
|                                        | Black or Black British                                                                                                                                | 0.78           | (0.16, 3.93)  | 0.9           | (0.17, 4.53)                       | 0.57                    | (-21.15, 22.28) |
|                                        | Chinese and Other                                                                                                                                     | -              | -             | -             | -                                  |                         |                 |
|                                        | Unclassified                                                                                                                                          | -              | -             | -             | -                                  |                         |                 |

| Indicator                              | <i>The proportion of women eligible for screening and aged 50-70 years who have had breast screening in the preceding three years</i> |                |               |               |                                    |                         |               |
|----------------------------------------|---------------------------------------------------------------------------------------------------------------------------------------|----------------|---------------|---------------|------------------------------------|-------------------------|---------------|
|                                        | Group: Screening                                                                                                                      |                |               |               |                                    |                         |               |
|                                        | Variable                                                                                                                              | Univariate     |               | Multivariable |                                    |                         |               |
| Odds Ratio (OR) of achieving indicator |                                                                                                                                       | (95% CI) of OR | OR            | (95% CI)      | Probability of achieving indicator | (95% CI) of probability |               |
| <b>Year</b>                            |                                                                                                                                       |                |               |               |                                    |                         |               |
|                                        | 2017/18 (comparator)                                                                                                                  | 1.0            | -             | 1.0           | -                                  | 0.27                    | (-1.42, 1.96) |
|                                        | 2018/19                                                                                                                               | 1.14           | (0.71, 1.85)  | 1.16          | (0.68, 1.98)                       | 0.30                    | (-1.56, 2.15) |
|                                        | 2019/20                                                                                                                               | 1.22           | (0.77, 1.95)  | 1.69          | (0.88, 3.21)                       | 0.37                    | (-1.94, 2.68) |
| <b>Prison</b>                          |                                                                                                                                       |                |               |               |                                    |                         |               |
|                                        | Prison 1                                                                                                                              | -              | -             | -             | -                                  | -                       | -             |
|                                        | Prison 2                                                                                                                              | -              | -             | -             | -                                  | -                       | -             |
|                                        | Prison 3                                                                                                                              | -              | -             | -             | -                                  | -                       | -             |
|                                        | Prison 4                                                                                                                              | -              | -             | -             | -                                  | -                       | -             |
|                                        | Prison 5                                                                                                                              | -              | -             | -             | -                                  | -                       | -             |
|                                        | Prison 6                                                                                                                              | -              | -             | -             | -                                  | -                       | -             |
|                                        | Prison 7                                                                                                                              | 1.0            | -             | 1.0           | -                                  | 0.51                    | (-2.71, 3.74) |
|                                        | Prison 8                                                                                                                              | 0.40           | (0.27, 0.59)  | 0.27          | (0.15, 0.47)                       | 0.24                    | (-1.24, 1.71) |
|                                        | Prison 9                                                                                                                              | -              | -             | -             | -                                  | -                       | -             |
|                                        | Prison 10                                                                                                                             | -              | -             | -             | -                                  | -                       | -             |
|                                        | Prison 11 (comparator)                                                                                                                | -              | -             | -             | -                                  | -                       | -             |
|                                        | Prison 12                                                                                                                             | -              | -             | -             | -                                  | -                       | -             |
|                                        | Prison 13                                                                                                                             | -              | -             | -             | -                                  | -                       | -             |
| <b>Prison category</b>                 |                                                                                                                                       |                |               |               |                                    |                         |               |
|                                        | A (comparator)                                                                                                                        | -              | -             | -             | -                                  | -                       | -             |
|                                        | B                                                                                                                                     | -              | -             | -             | -                                  | -                       | -             |
|                                        | C                                                                                                                                     | -              | -             | -             | -                                  | -                       | -             |
|                                        | Closed                                                                                                                                | -              | -             | -             | -                                  | -                       | -             |
|                                        | D                                                                                                                                     | -              | -             | -             | -                                  | -                       | -             |
|                                        | YOI                                                                                                                                   | -              | -             | -             | -                                  | -                       | -             |
| <b>Gender</b>                          |                                                                                                                                       |                |               |               |                                    |                         |               |
|                                        | Female (comparator)                                                                                                                   | -              | -             | -             | -                                  | 0.30                    | (-1.59, 2.19) |
|                                        | Male                                                                                                                                  | -              | -             | -             | -                                  | -                       | -             |
| <b>Age - years</b>                     |                                                                                                                                       |                |               |               |                                    |                         |               |
|                                        | 10 - <20                                                                                                                              | -              | -             | -             | -                                  | -                       | -             |
|                                        | 20 - <30                                                                                                                              | -              | -             | -             | -                                  | -                       | -             |
|                                        | 30 - <40                                                                                                                              | -              | -             | -             | -                                  | -                       | -             |
|                                        | 40 - <50                                                                                                                              | -              | -             | -             | -                                  | -                       | -             |
|                                        | 50 - <60 (comparator)                                                                                                                 | 1.0            | -             | 1.0           | -                                  | 0.34                    | (-1.79, 2.47) |
|                                        | 60 - <70                                                                                                                              | 0.58           | (0.36, 0.92)  | 0.43          | (0.23, 0.78)                       | 0.19                    | (-1.02, 1.41) |
|                                        | 70 - <80                                                                                                                              | 0.39           | (0.04, 3.34)  | 0.57          | (0.06, 5.38)                       | 0.24                    | (-1.29, 1.76) |
|                                        | 80 - <90                                                                                                                              | -              | -             | -             | -                                  | -                       | -             |
|                                        | 90 - <100                                                                                                                             | -              | -             | -             | -                                  | -                       | -             |
|                                        | 100 - <110                                                                                                                            | -              | -             | -             | -                                  | -                       | -             |
| <b>Length of Stay (months)</b>         |                                                                                                                                       |                |               |               |                                    |                         |               |
|                                        | <1                                                                                                                                    | 0.63           | (0.33, 1.19)  | 0.69          | (0.32, 1.47)                       | 0.21                    | (-1.11, 1.53) |
|                                        | 1-<6 (comparator)                                                                                                                     | 1.0            | -             | 1.0           | -                                  | 0.27                    | (-1.43, 1.98) |
|                                        | 6-<12                                                                                                                                 | 1.46           | (0.86, 2.5)   | 1.23          | (0.63, 2.38)                       | 0.31                    | (-1.64, 2.26) |
|                                        | 12-<24                                                                                                                                | 1.38           | (0.64, 2.98)  | 1.48          | (0.6, 3.66)                        | 0.35                    | (-1.84, 2.54) |
|                                        | 24+                                                                                                                                   | 2.05           | (1.23, 3.42)  | 1.84          | (0.98, 3.47)                       | 0.40                    | (-2.08, 2.87) |
| <b>Ethnic Group</b>                    |                                                                                                                                       |                |               |               |                                    |                         |               |
|                                        | White (comparator)                                                                                                                    | 1.0            | -             | 1.0           | -                                  | 0.30                    | (-1.56, 2.15) |
|                                        | Mixed                                                                                                                                 | 0.43           | (0.05, 3.75)  | -             | -                                  | -                       | -             |
|                                        | Asian or Asian British                                                                                                                | 0.56           | (0.06, 5.11)  | 0.62          | (0.06, 6.13)                       | 0.22                    | (-1.18, 1.61) |
|                                        | Black or Black British                                                                                                                | 3.57           | (0.58, 21.79) | 8.72          | (1.33, 57.19)                      | 0.74                    | (-3.92, 5.41) |
|                                        | Chinese and Other                                                                                                                     | 2.22           | (0.14, 36.08) | 4.67          | (0.25, 88.15)                      | 0.62                    | (-3.32, 4.57) |
|                                        | Unclassified                                                                                                                          | -              | -             | -             | -                                  | -                       | -             |

| <i>Offer people equivalent health checks to those offered in the community e.g. relevant NHS screening programmes, such as those for abdominal aortic aneurysm (AAA screening is offered to men during the screening year (1 April to 31 March) that they turn 65)</i> |                                        |                |               |               |                                    |                         |  |
|------------------------------------------------------------------------------------------------------------------------------------------------------------------------------------------------------------------------------------------------------------------------|----------------------------------------|----------------|---------------|---------------|------------------------------------|-------------------------|--|
| Indicator                                                                                                                                                                                                                                                              |                                        |                |               |               |                                    |                         |  |
| Group: Screening                                                                                                                                                                                                                                                       |                                        |                |               |               |                                    |                         |  |
| Variable                                                                                                                                                                                                                                                               | Univariate                             |                | Multivariable |               |                                    |                         |  |
|                                                                                                                                                                                                                                                                        | Odds Ratio (OR) of achieving indicator | (95% CI) of OR | OR            | (95% CI)      | Probability of achieving indicator | (95% CI) of probability |  |
| <b>Year</b>                                                                                                                                                                                                                                                            |                                        |                |               |               |                                    |                         |  |
| 2017/18 (comparator)                                                                                                                                                                                                                                                   | 1.0                                    | -              | 1.0           | -             | 0.54                               | (0.5, 0.59)             |  |
| 2018/19                                                                                                                                                                                                                                                                | 1.14                                   | (0.89, 1.47)   | 1.14          | (0.81, 1.59)  | 0.57                               | (0.52, 0.61)            |  |
| 2019/20                                                                                                                                                                                                                                                                | 1.05                                   | (0.82, 1.34)   | 1.32          | (0.94, 1.85)  | 0.59                               | (0.55, 0.64)            |  |
| <b>Prison</b>                                                                                                                                                                                                                                                          |                                        |                |               |               |                                    |                         |  |
| Prison 1                                                                                                                                                                                                                                                               | 19.21                                  | (5.08, 72.66)  | 9.12          | (1.6, 52.04)  | 0.83                               | (0.65, 1.01)            |  |
| Prison 2                                                                                                                                                                                                                                                               | 5.28                                   | (3.29, 8.5)    | 2.83          | (1.53, 5.25)  | 0.67                               | (0.61, 0.73)            |  |
| Prison 3                                                                                                                                                                                                                                                               | -                                      | -              | -             | -             | -                                  | -                       |  |
| Prison 4                                                                                                                                                                                                                                                               | 16.66                                  | (10.37, 26.75) | 2.80          | (1.42, 5.53)  | 0.67                               | (0.61, 0.73)            |  |
| Prison 5                                                                                                                                                                                                                                                               | 2.98                                   | (1.47, 6.04)   | 0.63          | (0.25, 1.54)  | 0.38                               | (0.24, 0.53)            |  |
| Prison 6                                                                                                                                                                                                                                                               | 7.62                                   | (4.23, 13.73)  | 4.52          | (1.9, 10.75)  | 0.74                               | (0.64, 0.84)            |  |
| Prison 7                                                                                                                                                                                                                                                               | -                                      | -              | -             | -             | -                                  | -                       |  |
| Prison 8                                                                                                                                                                                                                                                               | -                                      | -              | -             | -             | -                                  | -                       |  |
| Prison 9                                                                                                                                                                                                                                                               | 7.84                                   | (5, 12.3)      | 1.00          | (0.48, 2.05)  | 0.48                               | (0.41, 0.54)            |  |
| Prison 10                                                                                                                                                                                                                                                              | 2.26                                   | (1.38, 3.72)   | 1.22          | (0.64, 2.29)  | 0.52                               | (0.43, 0.6)             |  |
| Prison 11 (comparator)                                                                                                                                                                                                                                                 | 1.0                                    | -              | 1.0           | -             | 0.48                               | (0.36, 0.59)            |  |
| Prison 12                                                                                                                                                                                                                                                              | -                                      | -              | -             | -             | -                                  | -                       |  |
| Prison 13                                                                                                                                                                                                                                                              | 8.88                                   | (5.38, 14.66)  | 1.26          | (0.58, 2.73)  | 0.52                               | (0.44, 0.61)            |  |
| <b>Prison category</b>                                                                                                                                                                                                                                                 |                                        |                |               |               |                                    |                         |  |
| A (comparator)                                                                                                                                                                                                                                                         | 1.0                                    | -              | -             | -             | -                                  | -                       |  |
| B                                                                                                                                                                                                                                                                      | 0.29                                   | (0.22, 0.38)   | -             | -             | -                                  | -                       |  |
| C                                                                                                                                                                                                                                                                      | 0.51                                   | (0.39, 0.68)   | -             | -             | -                                  | -                       |  |
| Closed                                                                                                                                                                                                                                                                 | -                                      | -              | -             | -             | -                                  | -                       |  |
| D                                                                                                                                                                                                                                                                      | 0.66                                   | (0.44, 0.99)   | -             | -             | -                                  | -                       |  |
| YOI                                                                                                                                                                                                                                                                    | -                                      | -              | -             | -             | -                                  | -                       |  |
| <b>Gender</b>                                                                                                                                                                                                                                                          |                                        |                |               |               |                                    |                         |  |
| Female (comparator)                                                                                                                                                                                                                                                    | -                                      | -              | -             | -             | -                                  | -                       |  |
| Male                                                                                                                                                                                                                                                                   | -                                      | -              | -             | -             | 0.57                               | (0.54, 0.59)            |  |
| <b>Age - years</b>                                                                                                                                                                                                                                                     |                                        |                |               |               |                                    |                         |  |
| 10 - <20                                                                                                                                                                                                                                                               | -                                      | -              | -             | -             | -                                  | -                       |  |
| 20 - <30                                                                                                                                                                                                                                                               | -                                      | -              | -             | -             | -                                  | -                       |  |
| 30 - <40                                                                                                                                                                                                                                                               | -                                      | -              | -             | -             | -                                  | -                       |  |
| 40 - <50                                                                                                                                                                                                                                                               | -                                      | -              | -             | -             | -                                  | -                       |  |
| 50 - <60 (comparator)                                                                                                                                                                                                                                                  | 1.0                                    | -              | 1.0           | -             | -                                  | -                       |  |
| 60 - <70                                                                                                                                                                                                                                                               | 0.32                                   | (0.06, 1.65)   | 0.34          | (0.03, 3.48)  | 0.54                               | (0.5, 0.58)             |  |
| 70 - <80                                                                                                                                                                                                                                                               | 0.36                                   | (0.07, 1.86)   | 0.44          | (0.04, 4.49)  | 0.59                               | (0.55, 0.63)            |  |
| 80 - <90                                                                                                                                                                                                                                                               | 0.27                                   | (0.05, 1.44)   | 0.55          | (0.05, 5.93)  | 0.63                               | (0.54, 0.72)            |  |
| 90 - <100                                                                                                                                                                                                                                                              | -                                      | -              | -             | -             | 0.72                               | (0.39, 1.06)            |  |
| 100 - <110                                                                                                                                                                                                                                                             | -                                      | -              | -             | -             | -                                  | -                       |  |
| <b>Length of Stay (months)</b>                                                                                                                                                                                                                                         |                                        |                |               |               |                                    |                         |  |
| <1                                                                                                                                                                                                                                                                     | 0.33                                   | (0.18, 0.58)   | 0.27          | (0.14, 0.54)  | 0.11                               | (0.06, 0.17)            |  |
| 1-<6 (comparator)                                                                                                                                                                                                                                                      | 1.0                                    | -              | 1.0           | -             | 0.30                               | (0.22, 0.38)            |  |
| 6-<12                                                                                                                                                                                                                                                                  | 3.53                                   | (2.37, 5.27)   | 3.27          | (1.96, 5.47)  | 0.56                               | (0.47, 0.64)            |  |
| 12-<24                                                                                                                                                                                                                                                                 | 3.82                                   | (2.62, 5.57)   | 5.04          | (2.98, 8.54)  | 0.65                               | (0.58, 0.73)            |  |
| 24+                                                                                                                                                                                                                                                                    | 6.11                                   | (4.4, 8.48)    | 8.04          | (4.53, 14.26) | 0.74                               | (0.69, 0.79)            |  |
| <b>Ethnic Group</b>                                                                                                                                                                                                                                                    |                                        |                |               |               |                                    |                         |  |
| White (comparator)                                                                                                                                                                                                                                                     | 1.0                                    | -              | -             | -             | 0.57                               | (0.55, 0.6)             |  |
| Mixed                                                                                                                                                                                                                                                                  | 0.47                                   | (0.16, 1.39)   | 0.26          | (0.08, 0.81)  | 0.32                               | (0.11, 0.52)            |  |
| Asian or Asian British                                                                                                                                                                                                                                                 | 1.74                                   | (0.77, 3.95)   | 3.59          | (1, 12.89)    | 0.77                               | (0.61, 0.93)            |  |
| Black or Black British                                                                                                                                                                                                                                                 | 0.54                                   | (0.16, 1.86)   | 0.34          | (0.08, 1.43)  | 0.37                               | (0.1, 0.64)             |  |
| Chinese and Other                                                                                                                                                                                                                                                      | 1.02                                   | (0.06, 16.35)  | 1.52          | (0.09, 25.27) | 0.65                               | (0.18, 1.11)            |  |
| Unclassified                                                                                                                                                                                                                                                           | 1.30                                   | (0.65, 2.63)   | 0.68          | (0.31, 1.52)  | 0.50                               | (0.35, 0.65)            |  |

The proportion of people aged 45 to 74 years with a recorded cardiovascular disease risk assessment in the preceding 5 years, and who do NOT have a diagnosis of: coronary heart disease, chronic kidney disease, diabetes, hypertension, atrial fibrillation, transient ischaemic attack, familial hypercholesterolemia, heart failure, peripheral arterial disease, stroke or previously documented 20% or higher 10-year cardiovascular disease risk BEFORE the last 5 years

| Indicator                      | Group: Screening       |                                        |                |       |               |                                    |                         |
|--------------------------------|------------------------|----------------------------------------|----------------|-------|---------------|------------------------------------|-------------------------|
|                                | Variable               | Odds Ratio (OR) of achieving indicator | (95% CI) of OR | OR    | (95% CI)      | Probability of achieving indicator | (95% CI) of probability |
| <b>Year</b>                    | 2019/20                |                                        |                |       |               |                                    |                         |
| <b>Prison</b>                  | Prison 1               | 11.45                                  | (4.53, 28.96)  | 6.25  | (2.34, 16.69) | 0.57                               | (0.41, 0.73)            |
|                                | Prison 2               | 3.75                                   | (1.62, 8.66)   | 2.25  | (0.94, 5.37)  | 0.33                               | (0.21, 0.44)            |
|                                | Prison 3               | 4.53                                   | (2.01, 10.21)  | 2.67  | (1.12, 6.36)  | 0.37                               | (0.25, 0.48)            |
|                                | Prison 4               | 2.05                                   | (0.9, 4.64)    | 1.41  | (0.59, 3.39)  | 0.24                               | (0.14, 0.33)            |
|                                | Prison 5               | 3.75                                   | (1.35, 10.43)  | 2.40  | (0.78, 7.37)  | 0.34                               | (0.15, 0.53)            |
|                                | Prison 6               | 21.00                                  | (8.75, 50.39)  | 10.04 | (3.94, 25.56) | 0.67                               | (0.55, 0.8)             |
|                                | Prison 7               | 3.39                                   | (1.23, 9.36)   | 0.69  | (0.03, 13.91) | 0.13                               | (-0.15, 0.42)           |
|                                | Prison 8               | 2.88                                   | (1.13, 7.35)   | 0.89  | (0.05, 17.28) | 0.16                               | (-0.17, 0.5)            |
|                                | Prison 9               | 4.54                                   | (2.05, 10.06)  | 2.06  | (0.84, 5.06)  | 0.31                               | (0.21, 0.41)            |
|                                | Prison 10              | 3.94                                   | (1.66, 9.34)   | 2.65  | (1.07, 6.52)  | 0.36                               | (0.23, 0.5)             |
|                                | Prison 11 (comparator) | 1.0                                    | -              | 1.0   | -             | 0.18                               | (0.06, 0.31)            |
|                                | Prison 12              | -                                      | -              | -     | -             | -                                  | -                       |
|                                | Prison 13              | 9.85                                   | (4.41, 22.04)  | 4.62  | (1.87, 11.4)  | 0.49                               | (0.38, 0.61)            |
| <b>Prison category</b>         | A (comparator)         | 1.0                                    | -              | -     | -             | -                                  | -                       |
|                                | B                      | 0.44                                   | (0.3, 0.63)    | -     | -             | -                                  | -                       |
|                                | C                      | 0.56                                   | (0.41, 0.78)   | -     | -             | -                                  | -                       |
|                                | Closed                 | 0.48                                   | (0.29, 0.8)    | -     | -             | -                                  | -                       |
|                                | D                      | 1.82                                   | (1.17, 2.84)   | -     | -             | -                                  | -                       |
|                                | YOI                    | -                                      | -              | -     | -             | -                                  | -                       |
| <b>Gender</b>                  | Female (comparator)    | 1.0                                    | -              | 1.0   | -             | 0.50                               | (-0.06, 1.07)           |
|                                | Male                   | 1.46                                   | (0.92, 2.32)   | 0.45  | (0.03, 7.39)  | 0.33                               | (0.29, 0.38)            |
| <b>Age - years</b>             | 10 - <20               | -                                      | -              | -     | -             | -                                  | -                       |
|                                | 20 - <30               | -                                      | -              | -     | -             | -                                  | -                       |
|                                | 30 - <40               | -                                      | -              | -     | -             | -                                  | -                       |
|                                | 40 - <50               | 0.84                                   | (0.65, 1.1)    | 0.85  | (0.63, 1.15)  | 0.33                               | (0.29, 0.38)            |
|                                | 50 - <60 (comparator)  | 1.0                                    | -              | 1.0   | -             | 0.37                               | (0.32, 0.41)            |
|                                | 60 - <70               | 0.71                                   | (0.45, 1.12)   | 0.80  | (0.48, 1.34)  | 0.32                               | (0.23, 0.41)            |
|                                | 70 - <80               | 0.32                                   | (0.07, 1.44)   | 0.50  | (0.1, 2.4)    | 0.24                               | (-0.02, 0.49)           |
|                                | 80 - <90               | -                                      | -              | -     | -             | -                                  | -                       |
|                                | 90 - <100              | -                                      | -              | -     | -             | -                                  | -                       |
|                                | 100 - <110             | -                                      | -              | -     | -             | -                                  | -                       |
| <b>Length of Stay (months)</b> | <1                     | 0.72                                   | (0.42, 1.24)   | 0.88  | (0.49, 1.59)  | 0.25                               | (0.16, 0.34)            |
|                                | 1-<6 (comparator)      | 1.0                                    | -              | 1.0   | -             | 0.27                               | (0.21, 0.34)            |
|                                | 6-<12                  | 2.33                                   | (1.56, 3.48)   | 1.88  | (1.19, 2.97)  | 0.40                               | (0.33, 0.48)            |
|                                | 12-<24                 | 2.23                                   | (1.5, 3.32)    | 1.78  | (1.12, 2.82)  | 0.39                               | (0.32, 0.46)            |
|                                | 24+                    | 2.22                                   | (1.54, 3.2)    | 1.60  | (0.97, 2.65)  | 0.37                               | (0.3, 0.43)             |
| <b>Ethnic Group</b>            | White (comparator)     | 1.0                                    | -              | 1.0   | -             | 0.35                               | (0.31, 0.38)            |
|                                | Mixed                  | 0.92                                   | (0.44, 1.92)   | 0.93  | (0.43, 2)     | 0.33                               | (0.18, 0.48)            |
|                                | Asian or Asian British | 1.18                                   | (0.6, 2.32)    | 1.07  | (0.52, 2.23)  | 0.36                               | (0.21, 0.51)            |
|                                | Black or Black British | 1.93                                   | (0.83, 4.51)   | 1.82  | (0.74, 4.53)  | 0.48                               | (0.27, 0.68)            |
|                                | Chinese and Other      | 0.43                                   | (0.09, 2)      | 0.47  | (0.1, 2.32)   | 0.21                               | (-0.03, 0.45)           |
|                                | Unclassified           | 1.29                                   | (0.61, 2.71)   | 0.82  | (0.37, 1.85)  | 0.31                               | (0.15, 0.46)            |

| The proportion of people who have received three or more prescriptions for an antipsychotic in the preceding 12 months, and who have a record of blood testing (fasting glucose, HbA1c, lipid profile, urea and electrolytes, full blood count, liver function tests), body mass index and blood pressure |                                  |               |               |                       |       |                |                  |               |                |                |       |                |                      |      |              |      |               |      |              |      |              |      |               |      |               |                  |      |              |      |               |      |              |      |              |      |              |      |              |                        |      |               |      |               |      |               |      |               |      |               |      |               |                        |       |               |      |               |      |              |      |              |      |               |      |               |                   |      |               |      |               |      |               |      |               |      |               |      |               |                       |      |               |       |               |      |               |      |               |      |               |      |               |                    |      |               |      |               |      |              |      |               |      |               |      |               |                     |      |              |      |               |      |               |      |               |      |               |      |               |                        |      |               |       |                |       |                |       |               |       |                |       |               |                        |       |               |       |               |      |               |      |               |      |               |      |               |                                |     |   |      |               |      |              |      |              |      |              |      |               |              |      |               |       |                |       |                |       |               |       |                |       |               |                       |      |               |       |                |       |                |       |               |       |                |       |               |                                |      |               |      |              |      |              |      |              |      |              |      |              |                        |      |               |      |              |      |              |      |              |      |              |      |              |                  |      |               |       |               |       |               |      |               |      |               |       |               |                        |      |               |       |               |       |               |      |               |      |               |       |               |                        |      |               |      |              |      |              |      |              |      |              |      |              |                |      |               |      |              |      |               |      |              |      |              |      |               |                        |      |               |      |               |      |               |      |               |      |              |      |               |                                |       |              |      |              |      |              |      |              |      |              |      |              |                     |      |               |      |              |      |              |      |              |      |              |      |              |                        |      |               |      |               |      |               |      |               |      |              |      |               |                        |       |               |      |              |      |              |      |              |      |              |      |              |                     |      |               |      |              |      |              |      |              |      |              |      |              |                     |      |               |      |              |      |               |      |              |      |              |      |               |                       |   |   |      |              |      |              |      |              |      |             |      |             |                    |      |              |      |              |      |              |      |             |      |              |      |             |          |      |              |      |              |      |              |      |              |      |              |      |              |                        |      |               |      |               |      |               |      |               |      |               |      |               |                        |       |               |      |              |      |              |      |              |      |              |      |              |                   |      |              |      |              |      |              |      |              |      |              |      |              |              |      |               |      |              |      |              |      |               |      |               |      |               |            |      |               |      |              |      |              |      |               |      |               |      |               |                                |      |               |      |              |      |              |      |              |      |              |      |              |           |   |   |      |              |      |              |      |              |      |              |      |              |                  |   |   |   |   |   |   |   |   |   |   |   |   |                                |      |               |      |              |      |              |      |             |      |             |      |              |                                |      |               |      |              |      |              |      |              |      |              |      |              |                  |      |               |      |              |      |               |      |              |      |              |      |               |                     |      |               |      |              |      |              |      |             |      |             |      |              |                    |      |               |      |              |      |              |      |              |      |              |      |              |       |      |               |      |              |      |               |      |              |      |              |      |               |                        |      |               |      |               |      |               |      |               |      |              |      |               |                        |       |             |      |              |      |              |      |              |      |              |      |              |                    |   |   |      |              |      |             |      |              |      |              |      |              |                        |      |               |      |               |      |               |      |               |      |              |      |               |                        |       |               |      |               |      |               |      |               |      |              |      |               |                        |       |             |      |              |      |              |      |              |      |              |      |              |                   |   |   |      |              |      |              |      |              |      |              |      |               |              |   |   |      |              |      |              |      |              |      |              |      |               |
|-----------------------------------------------------------------------------------------------------------------------------------------------------------------------------------------------------------------------------------------------------------------------------------------------------------|----------------------------------|---------------|---------------|-----------------------|-------|----------------|------------------|---------------|----------------|----------------|-------|----------------|----------------------|------|--------------|------|---------------|------|--------------|------|--------------|------|---------------|------|---------------|------------------|------|--------------|------|---------------|------|--------------|------|--------------|------|--------------|------|--------------|------------------------|------|---------------|------|---------------|------|---------------|------|---------------|------|---------------|------|---------------|------------------------|-------|---------------|------|---------------|------|--------------|------|--------------|------|---------------|------|---------------|-------------------|------|---------------|------|---------------|------|---------------|------|---------------|------|---------------|------|---------------|-----------------------|------|---------------|-------|---------------|------|---------------|------|---------------|------|---------------|------|---------------|--------------------|------|---------------|------|---------------|------|--------------|------|---------------|------|---------------|------|---------------|---------------------|------|--------------|------|---------------|------|---------------|------|---------------|------|---------------|------|---------------|------------------------|------|---------------|-------|----------------|-------|----------------|-------|---------------|-------|----------------|-------|---------------|------------------------|-------|---------------|-------|---------------|------|---------------|------|---------------|------|---------------|------|---------------|--------------------------------|-----|---|------|---------------|------|--------------|------|--------------|------|--------------|------|---------------|--------------|------|---------------|-------|----------------|-------|----------------|-------|---------------|-------|----------------|-------|---------------|-----------------------|------|---------------|-------|----------------|-------|----------------|-------|---------------|-------|----------------|-------|---------------|--------------------------------|------|---------------|------|--------------|------|--------------|------|--------------|------|--------------|------|--------------|------------------------|------|---------------|------|--------------|------|--------------|------|--------------|------|--------------|------|--------------|------------------|------|---------------|-------|---------------|-------|---------------|------|---------------|------|---------------|-------|---------------|------------------------|------|---------------|-------|---------------|-------|---------------|------|---------------|------|---------------|-------|---------------|------------------------|------|---------------|------|--------------|------|--------------|------|--------------|------|--------------|------|--------------|----------------|------|---------------|------|--------------|------|---------------|------|--------------|------|--------------|------|---------------|------------------------|------|---------------|------|---------------|------|---------------|------|---------------|------|--------------|------|---------------|--------------------------------|-------|--------------|------|--------------|------|--------------|------|--------------|------|--------------|------|--------------|---------------------|------|---------------|------|--------------|------|--------------|------|--------------|------|--------------|------|--------------|------------------------|------|---------------|------|---------------|------|---------------|------|---------------|------|--------------|------|---------------|------------------------|-------|---------------|------|--------------|------|--------------|------|--------------|------|--------------|------|--------------|---------------------|------|---------------|------|--------------|------|--------------|------|--------------|------|--------------|------|--------------|---------------------|------|---------------|------|--------------|------|---------------|------|--------------|------|--------------|------|---------------|-----------------------|---|---|------|--------------|------|--------------|------|--------------|------|-------------|------|-------------|--------------------|------|--------------|------|--------------|------|--------------|------|-------------|------|--------------|------|-------------|----------|------|--------------|------|--------------|------|--------------|------|--------------|------|--------------|------|--------------|------------------------|------|---------------|------|---------------|------|---------------|------|---------------|------|---------------|------|---------------|------------------------|-------|---------------|------|--------------|------|--------------|------|--------------|------|--------------|------|--------------|-------------------|------|--------------|------|--------------|------|--------------|------|--------------|------|--------------|------|--------------|--------------|------|---------------|------|--------------|------|--------------|------|---------------|------|---------------|------|---------------|------------|------|---------------|------|--------------|------|--------------|------|---------------|------|---------------|------|---------------|--------------------------------|------|---------------|------|--------------|------|--------------|------|--------------|------|--------------|------|--------------|-----------|---|---|------|--------------|------|--------------|------|--------------|------|--------------|------|--------------|------------------|---|---|---|---|---|---|---|---|---|---|---|---|--------------------------------|------|---------------|------|--------------|------|--------------|------|-------------|------|-------------|------|--------------|--------------------------------|------|---------------|------|--------------|------|--------------|------|--------------|------|--------------|------|--------------|------------------|------|---------------|------|--------------|------|---------------|------|--------------|------|--------------|------|---------------|---------------------|------|---------------|------|--------------|------|--------------|------|-------------|------|-------------|------|--------------|--------------------|------|---------------|------|--------------|------|--------------|------|--------------|------|--------------|------|--------------|-------|------|---------------|------|--------------|------|---------------|------|--------------|------|--------------|------|---------------|------------------------|------|---------------|------|---------------|------|---------------|------|---------------|------|--------------|------|---------------|------------------------|-------|-------------|------|--------------|------|--------------|------|--------------|------|--------------|------|--------------|--------------------|---|---|------|--------------|------|-------------|------|--------------|------|--------------|------|--------------|------------------------|------|---------------|------|---------------|------|---------------|------|---------------|------|--------------|------|---------------|------------------------|-------|---------------|------|---------------|------|---------------|------|---------------|------|--------------|------|---------------|------------------------|-------|-------------|------|--------------|------|--------------|------|--------------|------|--------------|------|--------------|-------------------|---|---|------|--------------|------|--------------|------|--------------|------|--------------|------|---------------|--------------|---|---|------|--------------|------|--------------|------|--------------|------|--------------|------|---------------|
| Indicator                                                                                                                                                                                                                                                                                                 | Group: Mental health             |               |               |                       |       |                |                  |               |                |                |       |                |                      |      |              |      |               |      |              |      |              |      |               |      |               |                  |      |              |      |               |      |              |      |              |      |              |      |              |                        |      |               |      |               |      |               |      |               |      |               |      |               |                        |       |               |      |               |      |              |      |              |      |               |      |               |                   |      |               |      |               |      |               |      |               |      |               |      |               |                       |      |               |       |               |      |               |      |               |      |               |      |               |                    |      |               |      |               |      |              |      |               |      |               |      |               |                     |      |              |      |               |      |               |      |               |      |               |      |               |                        |      |               |       |                |       |                |       |               |       |                |       |               |                        |       |               |       |               |      |               |      |               |      |               |      |               |                                |     |   |      |               |      |              |      |              |      |              |      |               |              |      |               |       |                |       |                |       |               |       |                |       |               |                       |      |               |       |                |       |                |       |               |       |                |       |               |                                |      |               |      |              |      |              |      |              |      |              |      |              |                        |      |               |      |              |      |              |      |              |      |              |      |              |                  |      |               |       |               |       |               |      |               |      |               |       |               |                        |      |               |       |               |       |               |      |               |      |               |       |               |                        |      |               |      |              |      |              |      |              |      |              |      |              |                |      |               |      |              |      |               |      |              |      |              |      |               |                        |      |               |      |               |      |               |      |               |      |              |      |               |                                |       |              |      |              |      |              |      |              |      |              |      |              |                     |      |               |      |              |      |              |      |              |      |              |      |              |                        |      |               |      |               |      |               |      |               |      |              |      |               |                        |       |               |      |              |      |              |      |              |      |              |      |              |                     |      |               |      |              |      |              |      |              |      |              |      |              |                     |      |               |      |              |      |               |      |              |      |              |      |               |                       |   |   |      |              |      |              |      |              |      |             |      |             |                    |      |              |      |              |      |              |      |             |      |              |      |             |          |      |              |      |              |      |              |      |              |      |              |      |              |                        |      |               |      |               |      |               |      |               |      |               |      |               |                        |       |               |      |              |      |              |      |              |      |              |      |              |                   |      |              |      |              |      |              |      |              |      |              |      |              |              |      |               |      |              |      |              |      |               |      |               |      |               |            |      |               |      |              |      |              |      |               |      |               |      |               |                                |      |               |      |              |      |              |      |              |      |              |      |              |           |   |   |      |              |      |              |      |              |      |              |      |              |                  |   |   |   |   |   |   |   |   |   |   |   |   |                                |      |               |      |              |      |              |      |             |      |             |      |              |                                |      |               |      |              |      |              |      |              |      |              |      |              |                  |      |               |      |              |      |               |      |              |      |              |      |               |                     |      |               |      |              |      |              |      |             |      |             |      |              |                    |      |               |      |              |      |              |      |              |      |              |      |              |       |      |               |      |              |      |               |      |              |      |              |      |               |                        |      |               |      |               |      |               |      |               |      |              |      |               |                        |       |             |      |              |      |              |      |              |      |              |      |              |                    |   |   |      |              |      |             |      |              |      |              |      |              |                        |      |               |      |               |      |               |      |               |      |              |      |               |                        |       |               |      |               |      |               |      |               |      |              |      |               |                        |       |             |      |              |      |              |      |              |      |              |      |              |                   |   |   |      |              |      |              |      |              |      |              |      |               |              |   |   |      |              |      |              |      |              |      |              |      |               |
| Variable                                                                                                                                                                                                                                                                                                  | Fasting glucose                  | HbA1c         | Lipid profile | Urea and electrolytes |       |                | Full blood count |               | Liver function |                | BMI   | Blood Pressure |                      |      |              |      |               |      |              |      |              |      |               |      |               |                  |      |              |      |               |      |              |      |              |      |              |      |              |                        |      |               |      |               |      |               |      |               |      |               |      |               |                        |       |               |      |               |      |              |      |              |      |               |      |               |                   |      |               |      |               |      |               |      |               |      |               |      |               |                       |      |               |       |               |      |               |      |               |      |               |      |               |                    |      |               |      |               |      |              |      |               |      |               |      |               |                     |      |              |      |               |      |               |      |               |      |               |      |               |                        |      |               |       |                |       |                |       |               |       |                |       |               |                        |       |               |       |               |      |               |      |               |      |               |      |               |                                |     |   |      |               |      |              |      |              |      |              |      |               |              |      |               |       |                |       |                |       |               |       |                |       |               |                       |      |               |       |                |       |                |       |               |       |                |       |               |                                |      |               |      |              |      |              |      |              |      |              |      |              |                        |      |               |      |              |      |              |      |              |      |              |      |              |                  |      |               |       |               |       |               |      |               |      |               |       |               |                        |      |               |       |               |       |               |      |               |      |               |       |               |                        |      |               |      |              |      |              |      |              |      |              |      |              |                |      |               |      |              |      |               |      |              |      |              |      |               |                        |      |               |      |               |      |               |      |               |      |              |      |               |                                |       |              |      |              |      |              |      |              |      |              |      |              |                     |      |               |      |              |      |              |      |              |      |              |      |              |                        |      |               |      |               |      |               |      |               |      |              |      |               |                        |       |               |      |              |      |              |      |              |      |              |      |              |                     |      |               |      |              |      |              |      |              |      |              |      |              |                     |      |               |      |              |      |               |      |              |      |              |      |               |                       |   |   |      |              |      |              |      |              |      |             |      |             |                    |      |              |      |              |      |              |      |             |      |              |      |             |          |      |              |      |              |      |              |      |              |      |              |      |              |                        |      |               |      |               |      |               |      |               |      |               |      |               |                        |       |               |      |              |      |              |      |              |      |              |      |              |                   |      |              |      |              |      |              |      |              |      |              |      |              |              |      |               |      |              |      |              |      |               |      |               |      |               |            |      |               |      |              |      |              |      |               |      |               |      |               |                                |      |               |      |              |      |              |      |              |      |              |      |              |           |   |   |      |              |      |              |      |              |      |              |      |              |                  |   |   |   |   |   |   |   |   |   |   |   |   |                                |      |               |      |              |      |              |      |             |      |             |      |              |                                |      |               |      |              |      |              |      |              |      |              |      |              |                  |      |               |      |              |      |               |      |              |      |              |      |               |                     |      |               |      |              |      |              |      |             |      |             |      |              |                    |      |               |      |              |      |              |      |              |      |              |      |              |       |      |               |      |              |      |               |      |              |      |              |      |               |                        |      |               |      |               |      |               |      |               |      |              |      |               |                        |       |             |      |              |      |              |      |              |      |              |      |              |                    |   |   |      |              |      |             |      |              |      |              |      |              |                        |      |               |      |               |      |               |      |               |      |              |      |               |                        |       |               |      |               |      |               |      |               |      |              |      |               |                        |       |             |      |              |      |              |      |              |      |              |      |              |                   |   |   |      |              |      |              |      |              |      |              |      |               |              |   |   |      |              |      |              |      |              |      |              |      |               |
|                                                                                                                                                                                                                                                                                                           | Univariate: Odds ratios (95% CI) |               |               |                       |       |                |                  |               |                |                |       |                |                      |      |              |      |               |      |              |      |              |      |               |      |               |                  |      |              |      |               |      |              |      |              |      |              |      |              |                        |      |               |      |               |      |               |      |               |      |               |      |               |                        |       |               |      |               |      |              |      |              |      |               |      |               |                   |      |               |      |               |      |               |      |               |      |               |      |               |                       |      |               |       |               |      |               |      |               |      |               |      |               |                    |      |               |      |               |      |              |      |               |      |               |      |               |                     |      |              |      |               |      |               |      |               |      |               |      |               |                        |      |               |       |                |       |                |       |               |       |                |       |               |                        |       |               |       |               |      |               |      |               |      |               |      |               |                                |     |   |      |               |      |              |      |              |      |              |      |               |              |      |               |       |                |       |                |       |               |       |                |       |               |                       |      |               |       |                |       |                |       |               |       |                |       |               |                                |      |               |      |              |      |              |      |              |      |              |      |              |                        |      |               |      |              |      |              |      |              |      |              |      |              |                  |      |               |       |               |       |               |      |               |      |               |       |               |                        |      |               |       |               |       |               |      |               |      |               |       |               |                        |      |               |      |              |      |              |      |              |      |              |      |              |                |      |               |      |              |      |               |      |              |      |              |      |               |                        |      |               |      |               |      |               |      |               |      |              |      |               |                                |       |              |      |              |      |              |      |              |      |              |      |              |                     |      |               |      |              |      |              |      |              |      |              |      |              |                        |      |               |      |               |      |               |      |               |      |              |      |               |                        |       |               |      |              |      |              |      |              |      |              |      |              |                     |      |               |      |              |      |              |      |              |      |              |      |              |                     |      |               |      |              |      |               |      |              |      |              |      |               |                       |   |   |      |              |      |              |      |              |      |             |      |             |                    |      |              |      |              |      |              |      |             |      |              |      |             |          |      |              |      |              |      |              |      |              |      |              |      |              |                        |      |               |      |               |      |               |      |               |      |               |      |               |                        |       |               |      |              |      |              |      |              |      |              |      |              |                   |      |              |      |              |      |              |      |              |      |              |      |              |              |      |               |      |              |      |              |      |               |      |               |      |               |            |      |               |      |              |      |              |      |               |      |               |      |               |                                |      |               |      |              |      |              |      |              |      |              |      |              |           |   |   |      |              |      |              |      |              |      |              |      |              |                  |   |   |   |   |   |   |   |   |   |   |   |   |                                |      |               |      |              |      |              |      |             |      |             |      |              |                                |      |               |      |              |      |              |      |              |      |              |      |              |                  |      |               |      |              |      |               |      |              |      |              |      |               |                     |      |               |      |              |      |              |      |             |      |             |      |              |                    |      |               |      |              |      |              |      |              |      |              |      |              |       |      |               |      |              |      |               |      |              |      |              |      |               |                        |      |               |      |               |      |               |      |               |      |              |      |               |                        |       |             |      |              |      |              |      |              |      |              |      |              |                    |   |   |      |              |      |             |      |              |      |              |      |              |                        |      |               |      |               |      |               |      |               |      |              |      |               |                        |       |               |      |               |      |               |      |               |      |              |      |               |                        |       |             |      |              |      |              |      |              |      |              |      |              |                   |   |   |      |              |      |              |      |              |      |              |      |               |              |   |   |      |              |      |              |      |              |      |              |      |               |
| <b>Year</b>                                                                                                                                                                                                                                                                                               |                                  |               |               |                       |       |                |                  |               |                |                |       |                | 2017/18 (comparator) | 1.0  | -            | 1.0  | -             | 1.0  | -            | 1.0  | -            | 1.0  | -             | 1.0  | -             | 2018/19          | 0.18 | (0.04, 0.87) | 0.30 | (0.2, 0.46)   | 0.43 | (0.28, 0.67) | 0.25 | (0.17, 0.36) | 0.26 | (0.18, 0.37) | 0.18 | (0.12, 0.26) | 2019/20                | -    | -             | 0.15 | (0.09, 0.23)  | 0.17 | (0.1, 0.28)   | 0.10 | (0.06, 0.14)  | 0.10 | (0.06, 0.14)  | 0.06 | (0.03, 0.09)  | <b>Prison</b>          |       |               |      |               |      |              |      |              |      |               |      |               | Prison 1          | 2.67 | (0.21, 33.8)  | 3.82 | (1.02, 14.50) | 1.81 | (0.42, 7.69)  | 2.83 | (1.06, 7.56)  | 4.43 | (1.74, 11.25) | 4.40 | (1.55, 12.51) | Prison 2              | -    | -             | 5.46  | (1.95, 15.28) | 0.56 | (0.14, 2.31)  | 2.51 | (1.18, 5.32)  | 2.50 | (1.18, 5.31)  | 1.95 | (0.82, 4.63)  | Prison 3           | 0.39 | (0.02, 6.73)  | 5.00 | (1.78, 14.08) | 4.96 | (1.9, 12.93) | 5.06 | (2.47, 10.37) | 5.55 | (2.71, 11.36) | 1.78 | (0.74, 4.26)  | Prison 4            | -    | -            | 1.62 | (0.45, 5.95)  | 3.00 | (1.04, 8.67)  | 2.02 | (0.88, 4.62)  | 1.84 | (0.84, 4.25)  | 2.36 | (0.95, 5.87)  | Prison 5               | -    | -             | -     | -              | 4.49  | (0.39, 51.48)  | 1.49  | (0.14, 16.41) | 1.48  | (0.13, 16.33)  | 1.63  | (0.14, 19.02) | Prison 6               | 3.07  | (0.17, 57.07) | 11.87 | (2.83, 49.72) | 3.03 | (0.54, 17.13) | 5.87 | (1.67, 20.58) | 5.90 | (1.67, 20.77) | 8.35 | (2.1, 31.18)  | Prison 7                       | -   | - | 4.02 | (1.26, 11.88) | 3.63 | (1.12, 9.95) | 3.56 | (1.08, 7.53) | 3.79 | (1.4, 9.8)   | 4.48 | (1.92, 10.46) | Prison 8     | -    | -             | 6.90  | (2.42, 19.68)  | 2.51  | (0.85, 7.41)   | 4.16  | (1.94, 8.92)  | 3.64  | (1.68, 7.89)   | 3.85  | (1.62, 9.15)  | Prison 9              | 2.91 | (0.31, 27.69) | 30.88 | (11.31, 84.33) | 25.73 | (10.09, 65.57) | 13.49 | (6.39, 28.47) | 19.14 | (10.02, 40.62) | 23.68 | (10.2, 54.97) | Prison 10                      | -    | -             | 1.52 | (0.38, 6.83) | 0.45 | (0.05, 3.39) | 1.97 | (0.74, 5.28) | 1.97 | (0.74, 5.3)  | 1.69 | (0.55, 5.16) | Prison 11 (comparator) | 1.0  | -             | 1.0  | -            | 1.0  | -            | 1.0  | -            | 1.0  | -            | 1.0  | -            | Prison 12        | -    | -             | -     | -             | -     | -             | -    | -             | -    | -             | -     | -             | Prison 13              | -    | -             | 18.53 | (6.28, 54.57) | 11.62 | (4.15, 32.51) | 8.17 | (3.52, 19.01) | 8.21 | (3.52, 19.12) | 10.79 | (4.22, 27.62) | <b>Prison category</b> |      |               |      |              |      |              |      |              |      |              |      |              | A (comparator) | 1.0  | -             | 1.0  | -            | 1.0  | -             | 1.0  | -            | 1.0  | -            | 1.0  | -             | B                      | 0.09 | (0.01, 0.83)  | 0.10 | (0.06, 0.17)  | 0.04 | (0.02, 0.08)  | 0.15 | (0.09, 0.25)  | 0.12 | (0.07, 0.2)  | 0.08 | (0.05, 0.15)  | C                              | 0.33  | (0.08, 1.44) | 0.14 | (0.06, 0.23) | 0.19 | (0.11, 0.32) | 0.31 | (0.19, 0.5)  | 0.27 | (0.17, 0.44) | 0.13 | (0.08, 0.23) | Closed              | -    | -             | 0.21 | (0.12, 0.35) | 0.16 | (0.09, 0.28) | 0.34 | (0.21, 0.56) | 0.27 | (0.16, 0.44) | 0.24 | (0.14, 0.41) | D                      | 1.12 | (0.12, 10.79) | 0.28 | (0.09, 0.87)  | 0.18 | (0.05, 0.66)  | 0.38 | (0.13, 1.12)  | 0.31 | (0.1, 0.91)  | 0.52 | (0.1, 1.02)   | YOH                    | -     | -             | -    | -            | -    | -            | -    | -            | -    | -            | -    | -            | <b>Gender</b>       |      |               |      |              |      |              |      |              |      |              |      |              | Female (comparator) | 1.0  | -             | 1.0  | -            | 1.0  | -             | 1.0  | -            | 1.0  | -            | 1.0  | -             | Male                  | - | - | 0.86 | (0.54, 1.37) | 1.09 | (0.65, 1.83) | 0.81 | (0.53, 1.23) | 0.91 | (0.6, 1.39) | 0.71 | (0.46, 1.1) | <b>Age - years</b> |      |              |      |              |      |              |      |             |      |              |      |             | 10 - <20 | -    | -            | -    | -            | -    | -            | -    | -            | -    | -            | -    | -            | 20 - <30               | -    | -             | 0.68 | (0.37, 1.22)  | 0.60 | (0.31, 1.16)  | 0.61 | (0.37, 0.99)  | 0.58 | (0.35, 0.95)  | 0.57 | (0.33, 0.98)  | 30 - <40 (comparator)  | -     | -             | -    | -            | -    | -            | -    | -            | -    | -            | -    | -            | 40 - <50          | 0.77 | (0.14, 4.27) | 1.12 | (0.84, 2.09) | 1.24 | (0.76, 2.01) | 0.90 | (0.6, 1.35)  | 1.02 | (0.68, 1.52) | 0.76 | (0.48, 1.2)  | 50 - <60     | 1.46 | (0.26, 8.27)  | 2.27 | (1.31, 3.95) | 2.90 | (1.62, 4.8)  | 1.61 | (0.98, 2.7)   | 1.98 | (1.19, 3.3)   | 1.53 | (0.98, 2.07)  | 60 - <70   | 3.22 | (0.33, 31.44) | 3.73 | (1.47, 9.47) | 2.33 | (0.85, 6.42) | 7.39 | (2.84, 19.21) | 7.36 | (2.83, 19.13) | 8.98 | (2.86, 28.18) | 70 - <80                       | 5.38 | (0.52, 55.05) | 2.00 | (0.58, 6.87) | 1.63 | (0.43, 6.19) | 0.99 | (0.15, 2.32) | 0.91 | (0.26, 3.16) | 1.65 | (0.48, 5.62) | 80 - <90  | - | - | -    | -            | -    | -            | -    | -            | -    | -            | -    | -            | 90 - <100        | - | - | - | - | - | - | - | - | - | - | - | - | 100 - <110                     | -    | -             | -    | -            | -    | -            | -    | -           | -    | -           | -    | -            | <b>Length of Stay (months)</b> |      |               |      |              |      |              |      |              |      |              |      |              | <1               | -    | -             | 0.73 | (0.32, 1.66) | 0.57 | (0.19, 1.74)  | 0.70 | (0.35, 1.37) | 0.70 | (0.35, 1.37) | 0.93 | (0.44, 1.98)  | 1-6 (comparator)    | -    | -             | -    | -            | -    | -            | -    | -           | -    | -           | -    | -            | 6-12               | 2.86 | (0.25, 32.21) | 1.45 | (0.82, 2.56) | 1.66 | (0.85, 3.27) | 1.55 | (0.96, 2.5)  | 1.76 | (1.1, 2.83)  | 1.92 | (1.04, 2.74) | 12-24 | 2.97 | (0.26, 31.45) | 1.86 | (1.04, 3.33) | 3.31 | (1.69, 6.09)  | 2.11 | (1.29, 3.46) | 2.11 | (1.29, 3.45) | 2.13 | (1.46, 3.08)  | 24+                    | 6.26 | (0.72, 54.75) | 5.14 | (1.2, 8.93)   | 8.31 | (4.64, 14.88) | 4.94 | (3.11, 7.87)  | 5.70 | (3.58, 9.07) | 6.95 | (4.13, 11.69) | <b>Ethnic Group</b>    |       |             |      |              |      |              |      |              |      |              |      |              | White (comparator) | - | - | -    | -            | -    | -           | -    | -            | -    | -            | -    | -            | Mixed                  | -    | -             | 0.45 | (0.06, 3.63)  | -    | -             | 0.54 | (0.11, 2.65)  | 0.50 | (0.1, 2.48)  | 0.73 | (0.14, 3.76)  | Asian or Asian British | 9.62  | (0.99, 91.54) | 8.07 | (3.05, 21.34) | 4.65 | (1.72, 12.88) | 4.66 | (1.74, 12.48) | 4.34 | (1.62, 11.6) | 4.28 | (1.12, 16.46) | Black or Black British | 16.40 | (2.7, 99.6) | 0.90 | (0.24, 3.33) | 2.46 | (0.82, 7.31) | 1.80 | (0.64, 3.87) | 1.23 | (0.41, 3.64) | 1.80 | (0.58, 5.64) | Chinese and Other | - | - | 2.69 | (0.81, 8.95) | 1.60 | (0.62, 4.3)  | 2.81 | (0.84, 9.36) | 2.63 | (0.78, 8.73) | 1.72 | (0.49, 6.04)  | Unclassified | - | - | 2.45 | (0.65, 9.26) | 1.76 | (0.38, 8.21) | 1.51 | (0.39, 5.79) | 1.41 | (0.37, 5.41) | 2.60 | (0.64, 10.54) |
| 2017/18 (comparator)                                                                                                                                                                                                                                                                                      | 1.0                              | -             | 1.0           | -                     | 1.0   | -              | 1.0              | -             | 1.0            | -              | 1.0   | -              | 2018/19              | 0.18 | (0.04, 0.87) | 0.30 | (0.2, 0.46)   | 0.43 | (0.28, 0.67) | 0.25 | (0.17, 0.36) | 0.26 | (0.18, 0.37)  | 0.18 | (0.12, 0.26)  | 2019/20          | -    | -            | 0.15 | (0.09, 0.23)  | 0.17 | (0.1, 0.28)  | 0.10 | (0.06, 0.14) | 0.10 | (0.06, 0.14) | 0.06 | (0.03, 0.09) | <b>Prison</b>          |      |               |      |               |      |               |      |               |      |               |      |               | Prison 1               | 2.67  | (0.21, 33.8)  | 3.82 | (1.02, 14.50) | 1.81 | (0.42, 7.69) | 2.83 | (1.06, 7.56) | 4.43 | (1.74, 11.25) | 4.40 | (1.55, 12.51) | Prison 2          | -    | -             | 5.46 | (1.95, 15.28) | 0.56 | (0.14, 2.31)  | 2.51 | (1.18, 5.32)  | 2.50 | (1.18, 5.31)  | 1.95 | (0.82, 4.63)  | Prison 3              | 0.39 | (0.02, 6.73)  | 5.00  | (1.78, 14.08) | 4.96 | (1.9, 12.93)  | 5.06 | (2.47, 10.37) | 5.55 | (2.71, 11.36) | 1.78 | (0.74, 4.26)  | Prison 4           | -    | -             | 1.62 | (0.45, 5.95)  | 3.00 | (1.04, 8.67) | 2.02 | (0.88, 4.62)  | 1.84 | (0.84, 4.25)  | 2.36 | (0.95, 5.87)  | Prison 5            | -    | -            | -    | -             | 4.49 | (0.39, 51.48) | 1.49 | (0.14, 16.41) | 1.48 | (0.13, 16.33) | 1.63 | (0.14, 19.02) | Prison 6               | 3.07 | (0.17, 57.07) | 11.87 | (2.83, 49.72)  | 3.03  | (0.54, 17.13)  | 5.87  | (1.67, 20.58) | 5.90  | (1.67, 20.77)  | 8.35  | (2.1, 31.18)  | Prison 7               | -     | -             | 4.02  | (1.26, 11.88) | 3.63 | (1.12, 9.95)  | 3.56 | (1.08, 7.53)  | 3.79 | (1.4, 9.8)    | 4.48 | (1.92, 10.46) | Prison 8                       | -   | - | 6.90 | (2.42, 19.68) | 2.51 | (0.85, 7.41) | 4.16 | (1.94, 8.92) | 3.64 | (1.68, 7.89) | 3.85 | (1.62, 9.15)  | Prison 9     | 2.91 | (0.31, 27.69) | 30.88 | (11.31, 84.33) | 25.73 | (10.09, 65.57) | 13.49 | (6.39, 28.47) | 19.14 | (10.02, 40.62) | 23.68 | (10.2, 54.97) | Prison 10             | -    | -             | 1.52  | (0.38, 6.83)   | 0.45  | (0.05, 3.39)   | 1.97  | (0.74, 5.28)  | 1.97  | (0.74, 5.3)    | 1.69  | (0.55, 5.16)  | Prison 11 (comparator)         | 1.0  | -             | 1.0  | -            | 1.0  | -            | 1.0  | -            | 1.0  | -            | 1.0  | -            | Prison 12              | -    | -             | -    | -            | -    | -            | -    | -            | -    | -            | -    | -            | Prison 13        | -    | -             | 18.53 | (6.28, 54.57) | 11.62 | (4.15, 32.51) | 8.17 | (3.52, 19.01) | 8.21 | (3.52, 19.12) | 10.79 | (4.22, 27.62) | <b>Prison category</b> |      |               |       |               |       |               |      |               |      |               |       |               | A (comparator)         | 1.0  | -             | 1.0  | -            | 1.0  | -            | 1.0  | -            | 1.0  | -            | 1.0  | -            | B              | 0.09 | (0.01, 0.83)  | 0.10 | (0.06, 0.17) | 0.04 | (0.02, 0.08)  | 0.15 | (0.09, 0.25) | 0.12 | (0.07, 0.2)  | 0.08 | (0.05, 0.15)  | C                      | 0.33 | (0.08, 1.44)  | 0.14 | (0.06, 0.23)  | 0.19 | (0.11, 0.32)  | 0.31 | (0.19, 0.5)   | 0.27 | (0.17, 0.44) | 0.13 | (0.08, 0.23)  | Closed                         | -     | -            | 0.21 | (0.12, 0.35) | 0.16 | (0.09, 0.28) | 0.34 | (0.21, 0.56) | 0.27 | (0.16, 0.44) | 0.24 | (0.14, 0.41) | D                   | 1.12 | (0.12, 10.79) | 0.28 | (0.09, 0.87) | 0.18 | (0.05, 0.66) | 0.38 | (0.13, 1.12) | 0.31 | (0.1, 0.91)  | 0.52 | (0.1, 1.02)  | YOH                    | -    | -             | -    | -             | -    | -             | -    | -             | -    | -            | -    | -             | <b>Gender</b>          |       |               |      |              |      |              |      |              |      |              |      |              | Female (comparator) | 1.0  | -             | 1.0  | -            | 1.0  | -            | 1.0  | -            | 1.0  | -            | 1.0  | -            | Male                | -    | -             | 0.86 | (0.54, 1.37) | 1.09 | (0.65, 1.83)  | 0.81 | (0.53, 1.23) | 0.91 | (0.6, 1.39)  | 0.71 | (0.46, 1.1)   | <b>Age - years</b>    |   |   |      |              |      |              |      |              |      |             |      |             | 10 - <20           | -    | -            | -    | -            | -    | -            | -    | -           | -    | -            | -    | -           | 20 - <30 | -    | -            | 0.68 | (0.37, 1.22) | 0.60 | (0.31, 1.16) | 0.61 | (0.37, 0.99) | 0.58 | (0.35, 0.95) | 0.57 | (0.33, 0.98) | 30 - <40 (comparator)  | -    | -             | -    | -             | -    | -             | -    | -             | -    | -             | -    | -             | 40 - <50               | 0.77  | (0.14, 4.27)  | 1.12 | (0.84, 2.09) | 1.24 | (0.76, 2.01) | 0.90 | (0.6, 1.35)  | 1.02 | (0.68, 1.52) | 0.76 | (0.48, 1.2)  | 50 - <60          | 1.46 | (0.26, 8.27) | 2.27 | (1.31, 3.95) | 2.90 | (1.62, 4.8)  | 1.61 | (0.98, 2.7)  | 1.98 | (1.19, 3.3)  | 1.53 | (0.98, 2.07) | 60 - <70     | 3.22 | (0.33, 31.44) | 3.73 | (1.47, 9.47) | 2.33 | (0.85, 6.42) | 7.39 | (2.84, 19.21) | 7.36 | (2.83, 19.13) | 8.98 | (2.86, 28.18) | 70 - <80   | 5.38 | (0.52, 55.05) | 2.00 | (0.58, 6.87) | 1.63 | (0.43, 6.19) | 0.99 | (0.15, 2.32)  | 0.91 | (0.26, 3.16)  | 1.65 | (0.48, 5.62)  | 80 - <90                       | -    | -             | -    | -            | -    | -            | -    | -            | -    | -            | -    | -            | 90 - <100 | - | - | -    | -            | -    | -            | -    | -            | -    | -            | -    | -            | 100 - <110       | - | - | - | - | - | - | - | - | - | - | - | - | <b>Length of Stay (months)</b> |      |               |      |              |      |              |      |             |      |             |      |              | <1                             | -    | -             | 0.73 | (0.32, 1.66) | 0.57 | (0.19, 1.74) | 0.70 | (0.35, 1.37) | 0.70 | (0.35, 1.37) | 0.93 | (0.44, 1.98) | 1-6 (comparator) | -    | -             | -    | -            | -    | -             | -    | -            | -    | -            | -    | -             | 6-12                | 2.86 | (0.25, 32.21) | 1.45 | (0.82, 2.56) | 1.66 | (0.85, 3.27) | 1.55 | (0.96, 2.5) | 1.76 | (1.1, 2.83) | 1.92 | (1.04, 2.74) | 12-24              | 2.97 | (0.26, 31.45) | 1.86 | (1.04, 3.33) | 3.31 | (1.69, 6.09) | 2.11 | (1.29, 3.46) | 2.11 | (1.29, 3.45) | 2.13 | (1.46, 3.08) | 24+   | 6.26 | (0.72, 54.75) | 5.14 | (1.2, 8.93)  | 8.31 | (4.64, 14.88) | 4.94 | (3.11, 7.87) | 5.70 | (3.58, 9.07) | 6.95 | (4.13, 11.69) | <b>Ethnic Group</b>    |      |               |      |               |      |               |      |               |      |              |      |               | White (comparator)     | -     | -           | -    | -            | -    | -            | -    | -            | -    | -            | -    | -            | Mixed              | - | - | 0.45 | (0.06, 3.63) | -    | -           | 0.54 | (0.11, 2.65) | 0.50 | (0.1, 2.48)  | 0.73 | (0.14, 3.76) | Asian or Asian British | 9.62 | (0.99, 91.54) | 8.07 | (3.05, 21.34) | 4.65 | (1.72, 12.88) | 4.66 | (1.74, 12.48) | 4.34 | (1.62, 11.6) | 4.28 | (1.12, 16.46) | Black or Black British | 16.40 | (2.7, 99.6)   | 0.90 | (0.24, 3.33)  | 2.46 | (0.82, 7.31)  | 1.80 | (0.64, 3.87)  | 1.23 | (0.41, 3.64) | 1.80 | (0.58, 5.64)  | Chinese and Other      | -     | -           | 2.69 | (0.81, 8.95) | 1.60 | (0.62, 4.3)  | 2.81 | (0.84, 9.36) | 2.63 | (0.78, 8.73) | 1.72 | (0.49, 6.04) | Unclassified      | - | - | 2.45 | (0.65, 9.26) | 1.76 | (0.38, 8.21) | 1.51 | (0.39, 5.79) | 1.41 | (0.37, 5.41) | 2.60 | (0.64, 10.54) |              |   |   |      |              |      |              |      |              |      |              |      |               |
| 2018/19                                                                                                                                                                                                                                                                                                   | 0.18                             | (0.04, 0.87)  | 0.30          | (0.2, 0.46)           | 0.43  | (0.28, 0.67)   | 0.25             | (0.17, 0.36)  | 0.26           | (0.18, 0.37)   | 0.18  | (0.12, 0.26)   |                      |      |              |      |               |      |              |      |              |      |               |      |               |                  |      |              |      |               |      |              |      |              |      |              |      |              |                        |      |               |      |               |      |               |      |               |      |               |      |               |                        |       |               |      |               |      |              |      |              |      |               |      |               |                   |      |               |      |               |      |               |      |               |      |               |      |               |                       |      |               |       |               |      |               |      |               |      |               |      |               |                    |      |               |      |               |      |              |      |               |      |               |      |               |                     |      |              |      |               |      |               |      |               |      |               |      |               |                        |      |               |       |                |       |                |       |               |       |                |       |               |                        |       |               |       |               |      |               |      |               |      |               |      |               |                                |     |   |      |               |      |              |      |              |      |              |      |               |              |      |               |       |                |       |                |       |               |       |                |       |               |                       |      |               |       |                |       |                |       |               |       |                |       |               |                                |      |               |      |              |      |              |      |              |      |              |      |              |                        |      |               |      |              |      |              |      |              |      |              |      |              |                  |      |               |       |               |       |               |      |               |      |               |       |               |                        |      |               |       |               |       |               |      |               |      |               |       |               |                        |      |               |      |              |      |              |      |              |      |              |      |              |                |      |               |      |              |      |               |      |              |      |              |      |               |                        |      |               |      |               |      |               |      |               |      |              |      |               |                                |       |              |      |              |      |              |      |              |      |              |      |              |                     |      |               |      |              |      |              |      |              |      |              |      |              |                        |      |               |      |               |      |               |      |               |      |              |      |               |                        |       |               |      |              |      |              |      |              |      |              |      |              |                     |      |               |      |              |      |              |      |              |      |              |      |              |                     |      |               |      |              |      |               |      |              |      |              |      |               |                       |   |   |      |              |      |              |      |              |      |             |      |             |                    |      |              |      |              |      |              |      |             |      |              |      |             |          |      |              |      |              |      |              |      |              |      |              |      |              |                        |      |               |      |               |      |               |      |               |      |               |      |               |                        |       |               |      |              |      |              |      |              |      |              |      |              |                   |      |              |      |              |      |              |      |              |      |              |      |              |              |      |               |      |              |      |              |      |               |      |               |      |               |            |      |               |      |              |      |              |      |               |      |               |      |               |                                |      |               |      |              |      |              |      |              |      |              |      |              |           |   |   |      |              |      |              |      |              |      |              |      |              |                  |   |   |   |   |   |   |   |   |   |   |   |   |                                |      |               |      |              |      |              |      |             |      |             |      |              |                                |      |               |      |              |      |              |      |              |      |              |      |              |                  |      |               |      |              |      |               |      |              |      |              |      |               |                     |      |               |      |              |      |              |      |             |      |             |      |              |                    |      |               |      |              |      |              |      |              |      |              |      |              |       |      |               |      |              |      |               |      |              |      |              |      |               |                        |      |               |      |               |      |               |      |               |      |              |      |               |                        |       |             |      |              |      |              |      |              |      |              |      |              |                    |   |   |      |              |      |             |      |              |      |              |      |              |                        |      |               |      |               |      |               |      |               |      |              |      |               |                        |       |               |      |               |      |               |      |               |      |              |      |               |                        |       |             |      |              |      |              |      |              |      |              |      |              |                   |   |   |      |              |      |              |      |              |      |              |      |               |              |   |   |      |              |      |              |      |              |      |              |      |               |
| 2019/20                                                                                                                                                                                                                                                                                                   | -                                | -             | 0.15          | (0.09, 0.23)          | 0.17  | (0.1, 0.28)    | 0.10             | (0.06, 0.14)  | 0.10           | (0.06, 0.14)   | 0.06  | (0.03, 0.09)   |                      |      |              |      |               |      |              |      |              |      |               |      |               |                  |      |              |      |               |      |              |      |              |      |              |      |              |                        |      |               |      |               |      |               |      |               |      |               |      |               |                        |       |               |      |               |      |              |      |              |      |               |      |               |                   |      |               |      |               |      |               |      |               |      |               |      |               |                       |      |               |       |               |      |               |      |               |      |               |      |               |                    |      |               |      |               |      |              |      |               |      |               |      |               |                     |      |              |      |               |      |               |      |               |      |               |      |               |                        |      |               |       |                |       |                |       |               |       |                |       |               |                        |       |               |       |               |      |               |      |               |      |               |      |               |                                |     |   |      |               |      |              |      |              |      |              |      |               |              |      |               |       |                |       |                |       |               |       |                |       |               |                       |      |               |       |                |       |                |       |               |       |                |       |               |                                |      |               |      |              |      |              |      |              |      |              |      |              |                        |      |               |      |              |      |              |      |              |      |              |      |              |                  |      |               |       |               |       |               |      |               |      |               |       |               |                        |      |               |       |               |       |               |      |               |      |               |       |               |                        |      |               |      |              |      |              |      |              |      |              |      |              |                |      |               |      |              |      |               |      |              |      |              |      |               |                        |      |               |      |               |      |               |      |               |      |              |      |               |                                |       |              |      |              |      |              |      |              |      |              |      |              |                     |      |               |      |              |      |              |      |              |      |              |      |              |                        |      |               |      |               |      |               |      |               |      |              |      |               |                        |       |               |      |              |      |              |      |              |      |              |      |              |                     |      |               |      |              |      |              |      |              |      |              |      |              |                     |      |               |      |              |      |               |      |              |      |              |      |               |                       |   |   |      |              |      |              |      |              |      |             |      |             |                    |      |              |      |              |      |              |      |             |      |              |      |             |          |      |              |      |              |      |              |      |              |      |              |      |              |                        |      |               |      |               |      |               |      |               |      |               |      |               |                        |       |               |      |              |      |              |      |              |      |              |      |              |                   |      |              |      |              |      |              |      |              |      |              |      |              |              |      |               |      |              |      |              |      |               |      |               |      |               |            |      |               |      |              |      |              |      |               |      |               |      |               |                                |      |               |      |              |      |              |      |              |      |              |      |              |           |   |   |      |              |      |              |      |              |      |              |      |              |                  |   |   |   |   |   |   |   |   |   |   |   |   |                                |      |               |      |              |      |              |      |             |      |             |      |              |                                |      |               |      |              |      |              |      |              |      |              |      |              |                  |      |               |      |              |      |               |      |              |      |              |      |               |                     |      |               |      |              |      |              |      |             |      |             |      |              |                    |      |               |      |              |      |              |      |              |      |              |      |              |       |      |               |      |              |      |               |      |              |      |              |      |               |                        |      |               |      |               |      |               |      |               |      |              |      |               |                        |       |             |      |              |      |              |      |              |      |              |      |              |                    |   |   |      |              |      |             |      |              |      |              |      |              |                        |      |               |      |               |      |               |      |               |      |              |      |               |                        |       |               |      |               |      |               |      |               |      |              |      |               |                        |       |             |      |              |      |              |      |              |      |              |      |              |                   |   |   |      |              |      |              |      |              |      |              |      |               |              |   |   |      |              |      |              |      |              |      |              |      |               |
| <b>Prison</b>                                                                                                                                                                                                                                                                                             |                                  |               |               |                       |       |                |                  |               |                |                |       |                | Prison 1             | 2.67 | (0.21, 33.8) | 3.82 | (1.02, 14.50) | 1.81 | (0.42, 7.69) | 2.83 | (1.06, 7.56) | 4.43 | (1.74, 11.25) | 4.40 | (1.55, 12.51) | Prison 2         | -    | -            | 5.46 | (1.95, 15.28) | 0.56 | (0.14, 2.31) | 2.51 | (1.18, 5.32) | 2.50 | (1.18, 5.31) | 1.95 | (0.82, 4.63) | Prison 3               | 0.39 | (0.02, 6.73)  | 5.00 | (1.78, 14.08) | 4.96 | (1.9, 12.93)  | 5.06 | (2.47, 10.37) | 5.55 | (2.71, 11.36) | 1.78 | (0.74, 4.26)  | Prison 4               | -     | -             | 1.62 | (0.45, 5.95)  | 3.00 | (1.04, 8.67) | 2.02 | (0.88, 4.62) | 1.84 | (0.84, 4.25)  | 2.36 | (0.95, 5.87)  | Prison 5          | -    | -             | -    | -             | 4.49 | (0.39, 51.48) | 1.49 | (0.14, 16.41) | 1.48 | (0.13, 16.33) | 1.63 | (0.14, 19.02) | Prison 6              | 3.07 | (0.17, 57.07) | 11.87 | (2.83, 49.72) | 3.03 | (0.54, 17.13) | 5.87 | (1.67, 20.58) | 5.90 | (1.67, 20.77) | 8.35 | (2.1, 31.18)  | Prison 7           | -    | -             | 4.02 | (1.26, 11.88) | 3.63 | (1.12, 9.95) | 3.56 | (1.08, 7.53)  | 3.79 | (1.4, 9.8)    | 4.48 | (1.92, 10.46) | Prison 8            | -    | -            | 6.90 | (2.42, 19.68) | 2.51 | (0.85, 7.41)  | 4.16 | (1.94, 8.92)  | 3.64 | (1.68, 7.89)  | 3.85 | (1.62, 9.15)  | Prison 9               | 2.91 | (0.31, 27.69) | 30.88 | (11.31, 84.33) | 25.73 | (10.09, 65.57) | 13.49 | (6.39, 28.47) | 19.14 | (10.02, 40.62) | 23.68 | (10.2, 54.97) | Prison 10              | -     | -             | 1.52  | (0.38, 6.83)  | 0.45 | (0.05, 3.39)  | 1.97 | (0.74, 5.28)  | 1.97 | (0.74, 5.3)   | 1.69 | (0.55, 5.16)  | Prison 11 (comparator)         | 1.0 | - | 1.0  | -             | 1.0  | -            | 1.0  | -            | 1.0  | -            | 1.0  | -             | Prison 12    | -    | -             | -     | -              | -     | -              | -     | -             | -     | -              | -     | -             | Prison 13             | -    | -             | 18.53 | (6.28, 54.57)  | 11.62 | (4.15, 32.51)  | 8.17  | (3.52, 19.01) | 8.21  | (3.52, 19.12)  | 10.79 | (4.22, 27.62) | <b>Prison category</b>         |      |               |      |              |      |              |      |              |      |              |      |              | A (comparator)         | 1.0  | -             | 1.0  | -            | 1.0  | -            | 1.0  | -            | 1.0  | -            | 1.0  | -            | B                | 0.09 | (0.01, 0.83)  | 0.10  | (0.06, 0.17)  | 0.04  | (0.02, 0.08)  | 0.15 | (0.09, 0.25)  | 0.12 | (0.07, 0.2)   | 0.08  | (0.05, 0.15)  | C                      | 0.33 | (0.08, 1.44)  | 0.14  | (0.06, 0.23)  | 0.19  | (0.11, 0.32)  | 0.31 | (0.19, 0.5)   | 0.27 | (0.17, 0.44)  | 0.13  | (0.08, 0.23)  | Closed                 | -    | -             | 0.21 | (0.12, 0.35) | 0.16 | (0.09, 0.28) | 0.34 | (0.21, 0.56) | 0.27 | (0.16, 0.44) | 0.24 | (0.14, 0.41) | D              | 1.12 | (0.12, 10.79) | 0.28 | (0.09, 0.87) | 0.18 | (0.05, 0.66)  | 0.38 | (0.13, 1.12) | 0.31 | (0.1, 0.91)  | 0.52 | (0.1, 1.02)   | YOH                    | -    | -             | -    | -             | -    | -             | -    | -             | -    | -            | -    | -             | <b>Gender</b>                  |       |              |      |              |      |              |      |              |      |              |      |              | Female (comparator) | 1.0  | -             | 1.0  | -            | 1.0  | -            | 1.0  | -            | 1.0  | -            | 1.0  | -            | Male                   | -    | -             | 0.86 | (0.54, 1.37)  | 1.09 | (0.65, 1.83)  | 0.81 | (0.53, 1.23)  | 0.91 | (0.6, 1.39)  | 0.71 | (0.46, 1.1)   | <b>Age - years</b>     |       |               |      |              |      |              |      |              |      |              |      |              | 10 - <20            | -    | -             | -    | -            | -    | -            | -    | -            | -    | -            | -    | -            | 20 - <30            | -    | -             | 0.68 | (0.37, 1.22) | 0.60 | (0.31, 1.16)  | 0.61 | (0.37, 0.99) | 0.58 | (0.35, 0.95) | 0.57 | (0.33, 0.98)  | 30 - <40 (comparator) | - | - | -    | -            | -    | -            | -    | -            | -    | -           | -    | -           | 40 - <50           | 0.77 | (0.14, 4.27) | 1.12 | (0.84, 2.09) | 1.24 | (0.76, 2.01) | 0.90 | (0.6, 1.35) | 1.02 | (0.68, 1.52) | 0.76 | (0.48, 1.2) | 50 - <60 | 1.46 | (0.26, 8.27) | 2.27 | (1.31, 3.95) | 2.90 | (1.62, 4.8)  | 1.61 | (0.98, 2.7)  | 1.98 | (1.19, 3.3)  | 1.53 | (0.98, 2.07) | 60 - <70               | 3.22 | (0.33, 31.44) | 3.73 | (1.47, 9.47)  | 2.33 | (0.85, 6.42)  | 7.39 | (2.84, 19.21) | 7.36 | (2.83, 19.13) | 8.98 | (2.86, 28.18) | 70 - <80               | 5.38  | (0.52, 55.05) | 2.00 | (0.58, 6.87) | 1.63 | (0.43, 6.19) | 0.99 | (0.15, 2.32) | 0.91 | (0.26, 3.16) | 1.65 | (0.48, 5.62) | 80 - <90          | -    | -            | -    | -            | -    | -            | -    | -            | -    | -            | -    | -            | 90 - <100    | -    | -             | -    | -            | -    | -            | -    | -             | -    | -             | -    | -             | 100 - <110 | -    | -             | -    | -            | -    | -            | -    | -             | -    | -             | -    | -             | <b>Length of Stay (months)</b> |      |               |      |              |      |              |      |              |      |              |      |              | <1        | - | - | 0.73 | (0.32, 1.66) | 0.57 | (0.19, 1.74) | 0.70 | (0.35, 1.37) | 0.70 | (0.35, 1.37) | 0.93 | (0.44, 1.98) | 1-6 (comparator) | - | - | - | - | - | - | - | - | - | - | - | - | 6-12                           | 2.86 | (0.25, 32.21) | 1.45 | (0.82, 2.56) | 1.66 | (0.85, 3.27) | 1.55 | (0.96, 2.5) | 1.76 | (1.1, 2.83) | 1.92 | (1.04, 2.74) | 12-24                          | 2.97 | (0.26, 31.45) | 1.86 | (1.04, 3.33) | 3.31 | (1.69, 6.09) | 2.11 | (1.29, 3.46) | 2.11 | (1.29, 3.45) | 2.13 | (1.46, 3.08) | 24+              | 6.26 | (0.72, 54.75) | 5.14 | (1.2, 8.93)  | 8.31 | (4.64, 14.88) | 4.94 | (3.11, 7.87) | 5.70 | (3.58, 9.07) | 6.95 | (4.13, 11.69) | <b>Ethnic Group</b> |      |               |      |              |      |              |      |             |      |             |      |              | White (comparator) | -    | -             | -    | -            | -    | -            | -    | -            | -    | -            | -    | -            | Mixed | -    | -             | 0.45 | (0.06, 3.63) | -    | -             | 0.54 | (0.11, 2.65) | 0.50 | (0.1, 2.48)  | 0.73 | (0.14, 3.76)  | Asian or Asian British | 9.62 | (0.99, 91.54) | 8.07 | (3.05, 21.34) | 4.65 | (1.72, 12.88) | 4.66 | (1.74, 12.48) | 4.34 | (1.62, 11.6) | 4.28 | (1.12, 16.46) | Black or Black British | 16.40 | (2.7, 99.6) | 0.90 | (0.24, 3.33) | 2.46 | (0.82, 7.31) | 1.80 | (0.64, 3.87) | 1.23 | (0.41, 3.64) | 1.80 | (0.58, 5.64) | Chinese and Other  | - | - | 2.69 | (0.81, 8.95) | 1.60 | (0.62, 4.3) | 2.81 | (0.84, 9.36) | 2.63 | (0.78, 8.73) | 1.72 | (0.49, 6.04) | Unclassified           | -    | -             | 2.45 | (0.65, 9.26)  | 1.76 | (0.38, 8.21)  | 1.51 | (0.39, 5.79)  | 1.41 | (0.37, 5.41) | 2.60 | (0.64, 10.54) |                        |       |               |      |               |      |               |      |               |      |              |      |               |                        |       |             |      |              |      |              |      |              |      |              |      |              |                   |   |   |      |              |      |              |      |              |      |              |      |               |              |   |   |      |              |      |              |      |              |      |              |      |               |
| Prison 1                                                                                                                                                                                                                                                                                                  | 2.67                             | (0.21, 33.8)  | 3.82          | (1.02, 14.50)         | 1.81  | (0.42, 7.69)   | 2.83             | (1.06, 7.56)  | 4.43           | (1.74, 11.25)  | 4.40  | (1.55, 12.51)  |                      |      |              |      |               |      |              |      |              |      |               |      |               |                  |      |              |      |               |      |              |      |              |      |              |      |              |                        |      |               |      |               |      |               |      |               |      |               |      |               |                        |       |               |      |               |      |              |      |              |      |               |      |               |                   |      |               |      |               |      |               |      |               |      |               |      |               |                       |      |               |       |               |      |               |      |               |      |               |      |               |                    |      |               |      |               |      |              |      |               |      |               |      |               |                     |      |              |      |               |      |               |      |               |      |               |      |               |                        |      |               |       |                |       |                |       |               |       |                |       |               |                        |       |               |       |               |      |               |      |               |      |               |      |               |                                |     |   |      |               |      |              |      |              |      |              |      |               |              |      |               |       |                |       |                |       |               |       |                |       |               |                       |      |               |       |                |       |                |       |               |       |                |       |               |                                |      |               |      |              |      |              |      |              |      |              |      |              |                        |      |               |      |              |      |              |      |              |      |              |      |              |                  |      |               |       |               |       |               |      |               |      |               |       |               |                        |      |               |       |               |       |               |      |               |      |               |       |               |                        |      |               |      |              |      |              |      |              |      |              |      |              |                |      |               |      |              |      |               |      |              |      |              |      |               |                        |      |               |      |               |      |               |      |               |      |              |      |               |                                |       |              |      |              |      |              |      |              |      |              |      |              |                     |      |               |      |              |      |              |      |              |      |              |      |              |                        |      |               |      |               |      |               |      |               |      |              |      |               |                        |       |               |      |              |      |              |      |              |      |              |      |              |                     |      |               |      |              |      |              |      |              |      |              |      |              |                     |      |               |      |              |      |               |      |              |      |              |      |               |                       |   |   |      |              |      |              |      |              |      |             |      |             |                    |      |              |      |              |      |              |      |             |      |              |      |             |          |      |              |      |              |      |              |      |              |      |              |      |              |                        |      |               |      |               |      |               |      |               |      |               |      |               |                        |       |               |      |              |      |              |      |              |      |              |      |              |                   |      |              |      |              |      |              |      |              |      |              |      |              |              |      |               |      |              |      |              |      |               |      |               |      |               |            |      |               |      |              |      |              |      |               |      |               |      |               |                                |      |               |      |              |      |              |      |              |      |              |      |              |           |   |   |      |              |      |              |      |              |      |              |      |              |                  |   |   |   |   |   |   |   |   |   |   |   |   |                                |      |               |      |              |      |              |      |             |      |             |      |              |                                |      |               |      |              |      |              |      |              |      |              |      |              |                  |      |               |      |              |      |               |      |              |      |              |      |               |                     |      |               |      |              |      |              |      |             |      |             |      |              |                    |      |               |      |              |      |              |      |              |      |              |      |              |       |      |               |      |              |      |               |      |              |      |              |      |               |                        |      |               |      |               |      |               |      |               |      |              |      |               |                        |       |             |      |              |      |              |      |              |      |              |      |              |                    |   |   |      |              |      |             |      |              |      |              |      |              |                        |      |               |      |               |      |               |      |               |      |              |      |               |                        |       |               |      |               |      |               |      |               |      |              |      |               |                        |       |             |      |              |      |              |      |              |      |              |      |              |                   |   |   |      |              |      |              |      |              |      |              |      |               |              |   |   |      |              |      |              |      |              |      |              |      |               |
| Prison 2                                                                                                                                                                                                                                                                                                  | -                                | -             | 5.46          | (1.95, 15.28)         | 0.56  | (0.14, 2.31)   | 2.51             | (1.18, 5.32)  | 2.50           | (1.18, 5.31)   | 1.95  | (0.82, 4.63)   |                      |      |              |      |               |      |              |      |              |      |               |      |               |                  |      |              |      |               |      |              |      |              |      |              |      |              |                        |      |               |      |               |      |               |      |               |      |               |      |               |                        |       |               |      |               |      |              |      |              |      |               |      |               |                   |      |               |      |               |      |               |      |               |      |               |      |               |                       |      |               |       |               |      |               |      |               |      |               |      |               |                    |      |               |      |               |      |              |      |               |      |               |      |               |                     |      |              |      |               |      |               |      |               |      |               |      |               |                        |      |               |       |                |       |                |       |               |       |                |       |               |                        |       |               |       |               |      |               |      |               |      |               |      |               |                                |     |   |      |               |      |              |      |              |      |              |      |               |              |      |               |       |                |       |                |       |               |       |                |       |               |                       |      |               |       |                |       |                |       |               |       |                |       |               |                                |      |               |      |              |      |              |      |              |      |              |      |              |                        |      |               |      |              |      |              |      |              |      |              |      |              |                  |      |               |       |               |       |               |      |               |      |               |       |               |                        |      |               |       |               |       |               |      |               |      |               |       |               |                        |      |               |      |              |      |              |      |              |      |              |      |              |                |      |               |      |              |      |               |      |              |      |              |      |               |                        |      |               |      |               |      |               |      |               |      |              |      |               |                                |       |              |      |              |      |              |      |              |      |              |      |              |                     |      |               |      |              |      |              |      |              |      |              |      |              |                        |      |               |      |               |      |               |      |               |      |              |      |               |                        |       |               |      |              |      |              |      |              |      |              |      |              |                     |      |               |      |              |      |              |      |              |      |              |      |              |                     |      |               |      |              |      |               |      |              |      |              |      |               |                       |   |   |      |              |      |              |      |              |      |             |      |             |                    |      |              |      |              |      |              |      |             |      |              |      |             |          |      |              |      |              |      |              |      |              |      |              |      |              |                        |      |               |      |               |      |               |      |               |      |               |      |               |                        |       |               |      |              |      |              |      |              |      |              |      |              |                   |      |              |      |              |      |              |      |              |      |              |      |              |              |      |               |      |              |      |              |      |               |      |               |      |               |            |      |               |      |              |      |              |      |               |      |               |      |               |                                |      |               |      |              |      |              |      |              |      |              |      |              |           |   |   |      |              |      |              |      |              |      |              |      |              |                  |   |   |   |   |   |   |   |   |   |   |   |   |                                |      |               |      |              |      |              |      |             |      |             |      |              |                                |      |               |      |              |      |              |      |              |      |              |      |              |                  |      |               |      |              |      |               |      |              |      |              |      |               |                     |      |               |      |              |      |              |      |             |      |             |      |              |                    |      |               |      |              |      |              |      |              |      |              |      |              |       |      |               |      |              |      |               |      |              |      |              |      |               |                        |      |               |      |               |      |               |      |               |      |              |      |               |                        |       |             |      |              |      |              |      |              |      |              |      |              |                    |   |   |      |              |      |             |      |              |      |              |      |              |                        |      |               |      |               |      |               |      |               |      |              |      |               |                        |       |               |      |               |      |               |      |               |      |              |      |               |                        |       |             |      |              |      |              |      |              |      |              |      |              |                   |   |   |      |              |      |              |      |              |      |              |      |               |              |   |   |      |              |      |              |      |              |      |              |      |               |
| Prison 3                                                                                                                                                                                                                                                                                                  | 0.39                             | (0.02, 6.73)  | 5.00          | (1.78, 14.08)         | 4.96  | (1.9, 12.93)   | 5.06             | (2.47, 10.37) | 5.55           | (2.71, 11.36)  | 1.78  | (0.74, 4.26)   |                      |      |              |      |               |      |              |      |              |      |               |      |               |                  |      |              |      |               |      |              |      |              |      |              |      |              |                        |      |               |      |               |      |               |      |               |      |               |      |               |                        |       |               |      |               |      |              |      |              |      |               |      |               |                   |      |               |      |               |      |               |      |               |      |               |      |               |                       |      |               |       |               |      |               |      |               |      |               |      |               |                    |      |               |      |               |      |              |      |               |      |               |      |               |                     |      |              |      |               |      |               |      |               |      |               |      |               |                        |      |               |       |                |       |                |       |               |       |                |       |               |                        |       |               |       |               |      |               |      |               |      |               |      |               |                                |     |   |      |               |      |              |      |              |      |              |      |               |              |      |               |       |                |       |                |       |               |       |                |       |               |                       |      |               |       |                |       |                |       |               |       |                |       |               |                                |      |               |      |              |      |              |      |              |      |              |      |              |                        |      |               |      |              |      |              |      |              |      |              |      |              |                  |      |               |       |               |       |               |      |               |      |               |       |               |                        |      |               |       |               |       |               |      |               |      |               |       |               |                        |      |               |      |              |      |              |      |              |      |              |      |              |                |      |               |      |              |      |               |      |              |      |              |      |               |                        |      |               |      |               |      |               |      |               |      |              |      |               |                                |       |              |      |              |      |              |      |              |      |              |      |              |                     |      |               |      |              |      |              |      |              |      |              |      |              |                        |      |               |      |               |      |               |      |               |      |              |      |               |                        |       |               |      |              |      |              |      |              |      |              |      |              |                     |      |               |      |              |      |              |      |              |      |              |      |              |                     |      |               |      |              |      |               |      |              |      |              |      |               |                       |   |   |      |              |      |              |      |              |      |             |      |             |                    |      |              |      |              |      |              |      |             |      |              |      |             |          |      |              |      |              |      |              |      |              |      |              |      |              |                        |      |               |      |               |      |               |      |               |      |               |      |               |                        |       |               |      |              |      |              |      |              |      |              |      |              |                   |      |              |      |              |      |              |      |              |      |              |      |              |              |      |               |      |              |      |              |      |               |      |               |      |               |            |      |               |      |              |      |              |      |               |      |               |      |               |                                |      |               |      |              |      |              |      |              |      |              |      |              |           |   |   |      |              |      |              |      |              |      |              |      |              |                  |   |   |   |   |   |   |   |   |   |   |   |   |                                |      |               |      |              |      |              |      |             |      |             |      |              |                                |      |               |      |              |      |              |      |              |      |              |      |              |                  |      |               |      |              |      |               |      |              |      |              |      |               |                     |      |               |      |              |      |              |      |             |      |             |      |              |                    |      |               |      |              |      |              |      |              |      |              |      |              |       |      |               |      |              |      |               |      |              |      |              |      |               |                        |      |               |      |               |      |               |      |               |      |              |      |               |                        |       |             |      |              |      |              |      |              |      |              |      |              |                    |   |   |      |              |      |             |      |              |      |              |      |              |                        |      |               |      |               |      |               |      |               |      |              |      |               |                        |       |               |      |               |      |               |      |               |      |              |      |               |                        |       |             |      |              |      |              |      |              |      |              |      |              |                   |   |   |      |              |      |              |      |              |      |              |      |               |              |   |   |      |              |      |              |      |              |      |              |      |               |
| Prison 4                                                                                                                                                                                                                                                                                                  | -                                | -             | 1.62          | (0.45, 5.95)          | 3.00  | (1.04, 8.67)   | 2.02             | (0.88, 4.62)  | 1.84           | (0.84, 4.25)   | 2.36  | (0.95, 5.87)   |                      |      |              |      |               |      |              |      |              |      |               |      |               |                  |      |              |      |               |      |              |      |              |      |              |      |              |                        |      |               |      |               |      |               |      |               |      |               |      |               |                        |       |               |      |               |      |              |      |              |      |               |      |               |                   |      |               |      |               |      |               |      |               |      |               |      |               |                       |      |               |       |               |      |               |      |               |      |               |      |               |                    |      |               |      |               |      |              |      |               |      |               |      |               |                     |      |              |      |               |      |               |      |               |      |               |      |               |                        |      |               |       |                |       |                |       |               |       |                |       |               |                        |       |               |       |               |      |               |      |               |      |               |      |               |                                |     |   |      |               |      |              |      |              |      |              |      |               |              |      |               |       |                |       |                |       |               |       |                |       |               |                       |      |               |       |                |       |                |       |               |       |                |       |               |                                |      |               |      |              |      |              |      |              |      |              |      |              |                        |      |               |      |              |      |              |      |              |      |              |      |              |                  |      |               |       |               |       |               |      |               |      |               |       |               |                        |      |               |       |               |       |               |      |               |      |               |       |               |                        |      |               |      |              |      |              |      |              |      |              |      |              |                |      |               |      |              |      |               |      |              |      |              |      |               |                        |      |               |      |               |      |               |      |               |      |              |      |               |                                |       |              |      |              |      |              |      |              |      |              |      |              |                     |      |               |      |              |      |              |      |              |      |              |      |              |                        |      |               |      |               |      |               |      |               |      |              |      |               |                        |       |               |      |              |      |              |      |              |      |              |      |              |                     |      |               |      |              |      |              |      |              |      |              |      |              |                     |      |               |      |              |      |               |      |              |      |              |      |               |                       |   |   |      |              |      |              |      |              |      |             |      |             |                    |      |              |      |              |      |              |      |             |      |              |      |             |          |      |              |      |              |      |              |      |              |      |              |      |              |                        |      |               |      |               |      |               |      |               |      |               |      |               |                        |       |               |      |              |      |              |      |              |      |              |      |              |                   |      |              |      |              |      |              |      |              |      |              |      |              |              |      |               |      |              |      |              |      |               |      |               |      |               |            |      |               |      |              |      |              |      |               |      |               |      |               |                                |      |               |      |              |      |              |      |              |      |              |      |              |           |   |   |      |              |      |              |      |              |      |              |      |              |                  |   |   |   |   |   |   |   |   |   |   |   |   |                                |      |               |      |              |      |              |      |             |      |             |      |              |                                |      |               |      |              |      |              |      |              |      |              |      |              |                  |      |               |      |              |      |               |      |              |      |              |      |               |                     |      |               |      |              |      |              |      |             |      |             |      |              |                    |      |               |      |              |      |              |      |              |      |              |      |              |       |      |               |      |              |      |               |      |              |      |              |      |               |                        |      |               |      |               |      |               |      |               |      |              |      |               |                        |       |             |      |              |      |              |      |              |      |              |      |              |                    |   |   |      |              |      |             |      |              |      |              |      |              |                        |      |               |      |               |      |               |      |               |      |              |      |               |                        |       |               |      |               |      |               |      |               |      |              |      |               |                        |       |             |      |              |      |              |      |              |      |              |      |              |                   |   |   |      |              |      |              |      |              |      |              |      |               |              |   |   |      |              |      |              |      |              |      |              |      |               |
| Prison 5                                                                                                                                                                                                                                                                                                  | -                                | -             | -             | -                     | 4.49  | (0.39, 51.48)  | 1.49             | (0.14, 16.41) | 1.48           | (0.13, 16.33)  | 1.63  | (0.14, 19.02)  |                      |      |              |      |               |      |              |      |              |      |               |      |               |                  |      |              |      |               |      |              |      |              |      |              |      |              |                        |      |               |      |               |      |               |      |               |      |               |      |               |                        |       |               |      |               |      |              |      |              |      |               |      |               |                   |      |               |      |               |      |               |      |               |      |               |      |               |                       |      |               |       |               |      |               |      |               |      |               |      |               |                    |      |               |      |               |      |              |      |               |      |               |      |               |                     |      |              |      |               |      |               |      |               |      |               |      |               |                        |      |               |       |                |       |                |       |               |       |                |       |               |                        |       |               |       |               |      |               |      |               |      |               |      |               |                                |     |   |      |               |      |              |      |              |      |              |      |               |              |      |               |       |                |       |                |       |               |       |                |       |               |                       |      |               |       |                |       |                |       |               |       |                |       |               |                                |      |               |      |              |      |              |      |              |      |              |      |              |                        |      |               |      |              |      |              |      |              |      |              |      |              |                  |      |               |       |               |       |               |      |               |      |               |       |               |                        |      |               |       |               |       |               |      |               |      |               |       |               |                        |      |               |      |              |      |              |      |              |      |              |      |              |                |      |               |      |              |      |               |      |              |      |              |      |               |                        |      |               |      |               |      |               |      |               |      |              |      |               |                                |       |              |      |              |      |              |      |              |      |              |      |              |                     |      |               |      |              |      |              |      |              |      |              |      |              |                        |      |               |      |               |      |               |      |               |      |              |      |               |                        |       |               |      |              |      |              |      |              |      |              |      |              |                     |      |               |      |              |      |              |      |              |      |              |      |              |                     |      |               |      |              |      |               |      |              |      |              |      |               |                       |   |   |      |              |      |              |      |              |      |             |      |             |                    |      |              |      |              |      |              |      |             |      |              |      |             |          |      |              |      |              |      |              |      |              |      |              |      |              |                        |      |               |      |               |      |               |      |               |      |               |      |               |                        |       |               |      |              |      |              |      |              |      |              |      |              |                   |      |              |      |              |      |              |      |              |      |              |      |              |              |      |               |      |              |      |              |      |               |      |               |      |               |            |      |               |      |              |      |              |      |               |      |               |      |               |                                |      |               |      |              |      |              |      |              |      |              |      |              |           |   |   |      |              |      |              |      |              |      |              |      |              |                  |   |   |   |   |   |   |   |   |   |   |   |   |                                |      |               |      |              |      |              |      |             |      |             |      |              |                                |      |               |      |              |      |              |      |              |      |              |      |              |                  |      |               |      |              |      |               |      |              |      |              |      |               |                     |      |               |      |              |      |              |      |             |      |             |      |              |                    |      |               |      |              |      |              |      |              |      |              |      |              |       |      |               |      |              |      |               |      |              |      |              |      |               |                        |      |               |      |               |      |               |      |               |      |              |      |               |                        |       |             |      |              |      |              |      |              |      |              |      |              |                    |   |   |      |              |      |             |      |              |      |              |      |              |                        |      |               |      |               |      |               |      |               |      |              |      |               |                        |       |               |      |               |      |               |      |               |      |              |      |               |                        |       |             |      |              |      |              |      |              |      |              |      |              |                   |   |   |      |              |      |              |      |              |      |              |      |               |              |   |   |      |              |      |              |      |              |      |              |      |               |
| Prison 6                                                                                                                                                                                                                                                                                                  | 3.07                             | (0.17, 57.07) | 11.87         | (2.83, 49.72)         | 3.03  | (0.54, 17.13)  | 5.87             | (1.67, 20.58) | 5.90           | (1.67, 20.77)  | 8.35  | (2.1, 31.18)   |                      |      |              |      |               |      |              |      |              |      |               |      |               |                  |      |              |      |               |      |              |      |              |      |              |      |              |                        |      |               |      |               |      |               |      |               |      |               |      |               |                        |       |               |      |               |      |              |      |              |      |               |      |               |                   |      |               |      |               |      |               |      |               |      |               |      |               |                       |      |               |       |               |      |               |      |               |      |               |      |               |                    |      |               |      |               |      |              |      |               |      |               |      |               |                     |      |              |      |               |      |               |      |               |      |               |      |               |                        |      |               |       |                |       |                |       |               |       |                |       |               |                        |       |               |       |               |      |               |      |               |      |               |      |               |                                |     |   |      |               |      |              |      |              |      |              |      |               |              |      |               |       |                |       |                |       |               |       |                |       |               |                       |      |               |       |                |       |                |       |               |       |                |       |               |                                |      |               |      |              |      |              |      |              |      |              |      |              |                        |      |               |      |              |      |              |      |              |      |              |      |              |                  |      |               |       |               |       |               |      |               |      |               |       |               |                        |      |               |       |               |       |               |      |               |      |               |       |               |                        |      |               |      |              |      |              |      |              |      |              |      |              |                |      |               |      |              |      |               |      |              |      |              |      |               |                        |      |               |      |               |      |               |      |               |      |              |      |               |                                |       |              |      |              |      |              |      |              |      |              |      |              |                     |      |               |      |              |      |              |      |              |      |              |      |              |                        |      |               |      |               |      |               |      |               |      |              |      |               |                        |       |               |      |              |      |              |      |              |      |              |      |              |                     |      |               |      |              |      |              |      |              |      |              |      |              |                     |      |               |      |              |      |               |      |              |      |              |      |               |                       |   |   |      |              |      |              |      |              |      |             |      |             |                    |      |              |      |              |      |              |      |             |      |              |      |             |          |      |              |      |              |      |              |      |              |      |              |      |              |                        |      |               |      |               |      |               |      |               |      |               |      |               |                        |       |               |      |              |      |              |      |              |      |              |      |              |                   |      |              |      |              |      |              |      |              |      |              |      |              |              |      |               |      |              |      |              |      |               |      |               |      |               |            |      |               |      |              |      |              |      |               |      |               |      |               |                                |      |               |      |              |      |              |      |              |      |              |      |              |           |   |   |      |              |      |              |      |              |      |              |      |              |                  |   |   |   |   |   |   |   |   |   |   |   |   |                                |      |               |      |              |      |              |      |             |      |             |      |              |                                |      |               |      |              |      |              |      |              |      |              |      |              |                  |      |               |      |              |      |               |      |              |      |              |      |               |                     |      |               |      |              |      |              |      |             |      |             |      |              |                    |      |               |      |              |      |              |      |              |      |              |      |              |       |      |               |      |              |      |               |      |              |      |              |      |               |                        |      |               |      |               |      |               |      |               |      |              |      |               |                        |       |             |      |              |      |              |      |              |      |              |      |              |                    |   |   |      |              |      |             |      |              |      |              |      |              |                        |      |               |      |               |      |               |      |               |      |              |      |               |                        |       |               |      |               |      |               |      |               |      |              |      |               |                        |       |             |      |              |      |              |      |              |      |              |      |              |                   |   |   |      |              |      |              |      |              |      |              |      |               |              |   |   |      |              |      |              |      |              |      |              |      |               |
| Prison 7                                                                                                                                                                                                                                                                                                  | -                                | -             | 4.02          | (1.26, 11.88)         | 3.63  | (1.12, 9.95)   | 3.56             | (1.08, 7.53)  | 3.79           | (1.4, 9.8)     | 4.48  | (1.92, 10.46)  |                      |      |              |      |               |      |              |      |              |      |               |      |               |                  |      |              |      |               |      |              |      |              |      |              |      |              |                        |      |               |      |               |      |               |      |               |      |               |      |               |                        |       |               |      |               |      |              |      |              |      |               |      |               |                   |      |               |      |               |      |               |      |               |      |               |      |               |                       |      |               |       |               |      |               |      |               |      |               |      |               |                    |      |               |      |               |      |              |      |               |      |               |      |               |                     |      |              |      |               |      |               |      |               |      |               |      |               |                        |      |               |       |                |       |                |       |               |       |                |       |               |                        |       |               |       |               |      |               |      |               |      |               |      |               |                                |     |   |      |               |      |              |      |              |      |              |      |               |              |      |               |       |                |       |                |       |               |       |                |       |               |                       |      |               |       |                |       |                |       |               |       |                |       |               |                                |      |               |      |              |      |              |      |              |      |              |      |              |                        |      |               |      |              |      |              |      |              |      |              |      |              |                  |      |               |       |               |       |               |      |               |      |               |       |               |                        |      |               |       |               |       |               |      |               |      |               |       |               |                        |      |               |      |              |      |              |      |              |      |              |      |              |                |      |               |      |              |      |               |      |              |      |              |      |               |                        |      |               |      |               |      |               |      |               |      |              |      |               |                                |       |              |      |              |      |              |      |              |      |              |      |              |                     |      |               |      |              |      |              |      |              |      |              |      |              |                        |      |               |      |               |      |               |      |               |      |              |      |               |                        |       |               |      |              |      |              |      |              |      |              |      |              |                     |      |               |      |              |      |              |      |              |      |              |      |              |                     |      |               |      |              |      |               |      |              |      |              |      |               |                       |   |   |      |              |      |              |      |              |      |             |      |             |                    |      |              |      |              |      |              |      |             |      |              |      |             |          |      |              |      |              |      |              |      |              |      |              |      |              |                        |      |               |      |               |      |               |      |               |      |               |      |               |                        |       |               |      |              |      |              |      |              |      |              |      |              |                   |      |              |      |              |      |              |      |              |      |              |      |              |              |      |               |      |              |      |              |      |               |      |               |      |               |            |      |               |      |              |      |              |      |               |      |               |      |               |                                |      |               |      |              |      |              |      |              |      |              |      |              |           |   |   |      |              |      |              |      |              |      |              |      |              |                  |   |   |   |   |   |   |   |   |   |   |   |   |                                |      |               |      |              |      |              |      |             |      |             |      |              |                                |      |               |      |              |      |              |      |              |      |              |      |              |                  |      |               |      |              |      |               |      |              |      |              |      |               |                     |      |               |      |              |      |              |      |             |      |             |      |              |                    |      |               |      |              |      |              |      |              |      |              |      |              |       |      |               |      |              |      |               |      |              |      |              |      |               |                        |      |               |      |               |      |               |      |               |      |              |      |               |                        |       |             |      |              |      |              |      |              |      |              |      |              |                    |   |   |      |              |      |             |      |              |      |              |      |              |                        |      |               |      |               |      |               |      |               |      |              |      |               |                        |       |               |      |               |      |               |      |               |      |              |      |               |                        |       |             |      |              |      |              |      |              |      |              |      |              |                   |   |   |      |              |      |              |      |              |      |              |      |               |              |   |   |      |              |      |              |      |              |      |              |      |               |
| Prison 8                                                                                                                                                                                                                                                                                                  | -                                | -             | 6.90          | (2.42, 19.68)         | 2.51  | (0.85, 7.41)   | 4.16             | (1.94, 8.92)  | 3.64           | (1.68, 7.89)   | 3.85  | (1.62, 9.15)   |                      |      |              |      |               |      |              |      |              |      |               |      |               |                  |      |              |      |               |      |              |      |              |      |              |      |              |                        |      |               |      |               |      |               |      |               |      |               |      |               |                        |       |               |      |               |      |              |      |              |      |               |      |               |                   |      |               |      |               |      |               |      |               |      |               |      |               |                       |      |               |       |               |      |               |      |               |      |               |      |               |                    |      |               |      |               |      |              |      |               |      |               |      |               |                     |      |              |      |               |      |               |      |               |      |               |      |               |                        |      |               |       |                |       |                |       |               |       |                |       |               |                        |       |               |       |               |      |               |      |               |      |               |      |               |                                |     |   |      |               |      |              |      |              |      |              |      |               |              |      |               |       |                |       |                |       |               |       |                |       |               |                       |      |               |       |                |       |                |       |               |       |                |       |               |                                |      |               |      |              |      |              |      |              |      |              |      |              |                        |      |               |      |              |      |              |      |              |      |              |      |              |                  |      |               |       |               |       |               |      |               |      |               |       |               |                        |      |               |       |               |       |               |      |               |      |               |       |               |                        |      |               |      |              |      |              |      |              |      |              |      |              |                |      |               |      |              |      |               |      |              |      |              |      |               |                        |      |               |      |               |      |               |      |               |      |              |      |               |                                |       |              |      |              |      |              |      |              |      |              |      |              |                     |      |               |      |              |      |              |      |              |      |              |      |              |                        |      |               |      |               |      |               |      |               |      |              |      |               |                        |       |               |      |              |      |              |      |              |      |              |      |              |                     |      |               |      |              |      |              |      |              |      |              |      |              |                     |      |               |      |              |      |               |      |              |      |              |      |               |                       |   |   |      |              |      |              |      |              |      |             |      |             |                    |      |              |      |              |      |              |      |             |      |              |      |             |          |      |              |      |              |      |              |      |              |      |              |      |              |                        |      |               |      |               |      |               |      |               |      |               |      |               |                        |       |               |      |              |      |              |      |              |      |              |      |              |                   |      |              |      |              |      |              |      |              |      |              |      |              |              |      |               |      |              |      |              |      |               |      |               |      |               |            |      |               |      |              |      |              |      |               |      |               |      |               |                                |      |               |      |              |      |              |      |              |      |              |      |              |           |   |   |      |              |      |              |      |              |      |              |      |              |                  |   |   |   |   |   |   |   |   |   |   |   |   |                                |      |               |      |              |      |              |      |             |      |             |      |              |                                |      |               |      |              |      |              |      |              |      |              |      |              |                  |      |               |      |              |      |               |      |              |      |              |      |               |                     |      |               |      |              |      |              |      |             |      |             |      |              |                    |      |               |      |              |      |              |      |              |      |              |      |              |       |      |               |      |              |      |               |      |              |      |              |      |               |                        |      |               |      |               |      |               |      |               |      |              |      |               |                        |       |             |      |              |      |              |      |              |      |              |      |              |                    |   |   |      |              |      |             |      |              |      |              |      |              |                        |      |               |      |               |      |               |      |               |      |              |      |               |                        |       |               |      |               |      |               |      |               |      |              |      |               |                        |       |             |      |              |      |              |      |              |      |              |      |              |                   |   |   |      |              |      |              |      |              |      |              |      |               |              |   |   |      |              |      |              |      |              |      |              |      |               |
| Prison 9                                                                                                                                                                                                                                                                                                  | 2.91                             | (0.31, 27.69) | 30.88         | (11.31, 84.33)        | 25.73 | (10.09, 65.57) | 13.49            | (6.39, 28.47) | 19.14          | (10.02, 40.62) | 23.68 | (10.2, 54.97)  |                      |      |              |      |               |      |              |      |              |      |               |      |               |                  |      |              |      |               |      |              |      |              |      |              |      |              |                        |      |               |      |               |      |               |      |               |      |               |      |               |                        |       |               |      |               |      |              |      |              |      |               |      |               |                   |      |               |      |               |      |               |      |               |      |               |      |               |                       |      |               |       |               |      |               |      |               |      |               |      |               |                    |      |               |      |               |      |              |      |               |      |               |      |               |                     |      |              |      |               |      |               |      |               |      |               |      |               |                        |      |               |       |                |       |                |       |               |       |                |       |               |                        |       |               |       |               |      |               |      |               |      |               |      |               |                                |     |   |      |               |      |              |      |              |      |              |      |               |              |      |               |       |                |       |                |       |               |       |                |       |               |                       |      |               |       |                |       |                |       |               |       |                |       |               |                                |      |               |      |              |      |              |      |              |      |              |      |              |                        |      |               |      |              |      |              |      |              |      |              |      |              |                  |      |               |       |               |       |               |      |               |      |               |       |               |                        |      |               |       |               |       |               |      |               |      |               |       |               |                        |      |               |      |              |      |              |      |              |      |              |      |              |                |      |               |      |              |      |               |      |              |      |              |      |               |                        |      |               |      |               |      |               |      |               |      |              |      |               |                                |       |              |      |              |      |              |      |              |      |              |      |              |                     |      |               |      |              |      |              |      |              |      |              |      |              |                        |      |               |      |               |      |               |      |               |      |              |      |               |                        |       |               |      |              |      |              |      |              |      |              |      |              |                     |      |               |      |              |      |              |      |              |      |              |      |              |                     |      |               |      |              |      |               |      |              |      |              |      |               |                       |   |   |      |              |      |              |      |              |      |             |      |             |                    |      |              |      |              |      |              |      |             |      |              |      |             |          |      |              |      |              |      |              |      |              |      |              |      |              |                        |      |               |      |               |      |               |      |               |      |               |      |               |                        |       |               |      |              |      |              |      |              |      |              |      |              |                   |      |              |      |              |      |              |      |              |      |              |      |              |              |      |               |      |              |      |              |      |               |      |               |      |               |            |      |               |      |              |      |              |      |               |      |               |      |               |                                |      |               |      |              |      |              |      |              |      |              |      |              |           |   |   |      |              |      |              |      |              |      |              |      |              |                  |   |   |   |   |   |   |   |   |   |   |   |   |                                |      |               |      |              |      |              |      |             |      |             |      |              |                                |      |               |      |              |      |              |      |              |      |              |      |              |                  |      |               |      |              |      |               |      |              |      |              |      |               |                     |      |               |      |              |      |              |      |             |      |             |      |              |                    |      |               |      |              |      |              |      |              |      |              |      |              |       |      |               |      |              |      |               |      |              |      |              |      |               |                        |      |               |      |               |      |               |      |               |      |              |      |               |                        |       |             |      |              |      |              |      |              |      |              |      |              |                    |   |   |      |              |      |             |      |              |      |              |      |              |                        |      |               |      |               |      |               |      |               |      |              |      |               |                        |       |               |      |               |      |               |      |               |      |              |      |               |                        |       |             |      |              |      |              |      |              |      |              |      |              |                   |   |   |      |              |      |              |      |              |      |              |      |               |              |   |   |      |              |      |              |      |              |      |              |      |               |
| Prison 10                                                                                                                                                                                                                                                                                                 | -                                | -             | 1.52          | (0.38, 6.83)          | 0.45  | (0.05, 3.39)   | 1.97             | (0.74, 5.28)  | 1.97           | (0.74, 5.3)    | 1.69  | (0.55, 5.16)   |                      |      |              |      |               |      |              |      |              |      |               |      |               |                  |      |              |      |               |      |              |      |              |      |              |      |              |                        |      |               |      |               |      |               |      |               |      |               |      |               |                        |       |               |      |               |      |              |      |              |      |               |      |               |                   |      |               |      |               |      |               |      |               |      |               |      |               |                       |      |               |       |               |      |               |      |               |      |               |      |               |                    |      |               |      |               |      |              |      |               |      |               |      |               |                     |      |              |      |               |      |               |      |               |      |               |      |               |                        |      |               |       |                |       |                |       |               |       |                |       |               |                        |       |               |       |               |      |               |      |               |      |               |      |               |                                |     |   |      |               |      |              |      |              |      |              |      |               |              |      |               |       |                |       |                |       |               |       |                |       |               |                       |      |               |       |                |       |                |       |               |       |                |       |               |                                |      |               |      |              |      |              |      |              |      |              |      |              |                        |      |               |      |              |      |              |      |              |      |              |      |              |                  |      |               |       |               |       |               |      |               |      |               |       |               |                        |      |               |       |               |       |               |      |               |      |               |       |               |                        |      |               |      |              |      |              |      |              |      |              |      |              |                |      |               |      |              |      |               |      |              |      |              |      |               |                        |      |               |      |               |      |               |      |               |      |              |      |               |                                |       |              |      |              |      |              |      |              |      |              |      |              |                     |      |               |      |              |      |              |      |              |      |              |      |              |                        |      |               |      |               |      |               |      |               |      |              |      |               |                        |       |               |      |              |      |              |      |              |      |              |      |              |                     |      |               |      |              |      |              |      |              |      |              |      |              |                     |      |               |      |              |      |               |      |              |      |              |      |               |                       |   |   |      |              |      |              |      |              |      |             |      |             |                    |      |              |      |              |      |              |      |             |      |              |      |             |          |      |              |      |              |      |              |      |              |      |              |      |              |                        |      |               |      |               |      |               |      |               |      |               |      |               |                        |       |               |      |              |      |              |      |              |      |              |      |              |                   |      |              |      |              |      |              |      |              |      |              |      |              |              |      |               |      |              |      |              |      |               |      |               |      |               |            |      |               |      |              |      |              |      |               |      |               |      |               |                                |      |               |      |              |      |              |      |              |      |              |      |              |           |   |   |      |              |      |              |      |              |      |              |      |              |                  |   |   |   |   |   |   |   |   |   |   |   |   |                                |      |               |      |              |      |              |      |             |      |             |      |              |                                |      |               |      |              |      |              |      |              |      |              |      |              |                  |      |               |      |              |      |               |      |              |      |              |      |               |                     |      |               |      |              |      |              |      |             |      |             |      |              |                    |      |               |      |              |      |              |      |              |      |              |      |              |       |      |               |      |              |      |               |      |              |      |              |      |               |                        |      |               |      |               |      |               |      |               |      |              |      |               |                        |       |             |      |              |      |              |      |              |      |              |      |              |                    |   |   |      |              |      |             |      |              |      |              |      |              |                        |      |               |      |               |      |               |      |               |      |              |      |               |                        |       |               |      |               |      |               |      |               |      |              |      |               |                        |       |             |      |              |      |              |      |              |      |              |      |              |                   |   |   |      |              |      |              |      |              |      |              |      |               |              |   |   |      |              |      |              |      |              |      |              |      |               |
| Prison 11 (comparator)                                                                                                                                                                                                                                                                                    | 1.0                              | -             | 1.0           | -                     | 1.0   | -              | 1.0              | -             | 1.0            | -              | 1.0   | -              |                      |      |              |      |               |      |              |      |              |      |               |      |               |                  |      |              |      |               |      |              |      |              |      |              |      |              |                        |      |               |      |               |      |               |      |               |      |               |      |               |                        |       |               |      |               |      |              |      |              |      |               |      |               |                   |      |               |      |               |      |               |      |               |      |               |      |               |                       |      |               |       |               |      |               |      |               |      |               |      |               |                    |      |               |      |               |      |              |      |               |      |               |      |               |                     |      |              |      |               |      |               |      |               |      |               |      |               |                        |      |               |       |                |       |                |       |               |       |                |       |               |                        |       |               |       |               |      |               |      |               |      |               |      |               |                                |     |   |      |               |      |              |      |              |      |              |      |               |              |      |               |       |                |       |                |       |               |       |                |       |               |                       |      |               |       |                |       |                |       |               |       |                |       |               |                                |      |               |      |              |      |              |      |              |      |              |      |              |                        |      |               |      |              |      |              |      |              |      |              |      |              |                  |      |               |       |               |       |               |      |               |      |               |       |               |                        |      |               |       |               |       |               |      |               |      |               |       |               |                        |      |               |      |              |      |              |      |              |      |              |      |              |                |      |               |      |              |      |               |      |              |      |              |      |               |                        |      |               |      |               |      |               |      |               |      |              |      |               |                                |       |              |      |              |      |              |      |              |      |              |      |              |                     |      |               |      |              |      |              |      |              |      |              |      |              |                        |      |               |      |               |      |               |      |               |      |              |      |               |                        |       |               |      |              |      |              |      |              |      |              |      |              |                     |      |               |      |              |      |              |      |              |      |              |      |              |                     |      |               |      |              |      |               |      |              |      |              |      |               |                       |   |   |      |              |      |              |      |              |      |             |      |             |                    |      |              |      |              |      |              |      |             |      |              |      |             |          |      |              |      |              |      |              |      |              |      |              |      |              |                        |      |               |      |               |      |               |      |               |      |               |      |               |                        |       |               |      |              |      |              |      |              |      |              |      |              |                   |      |              |      |              |      |              |      |              |      |              |      |              |              |      |               |      |              |      |              |      |               |      |               |      |               |            |      |               |      |              |      |              |      |               |      |               |      |               |                                |      |               |      |              |      |              |      |              |      |              |      |              |           |   |   |      |              |      |              |      |              |      |              |      |              |                  |   |   |   |   |   |   |   |   |   |   |   |   |                                |      |               |      |              |      |              |      |             |      |             |      |              |                                |      |               |      |              |      |              |      |              |      |              |      |              |                  |      |               |      |              |      |               |      |              |      |              |      |               |                     |      |               |      |              |      |              |      |             |      |             |      |              |                    |      |               |      |              |      |              |      |              |      |              |      |              |       |      |               |      |              |      |               |      |              |      |              |      |               |                        |      |               |      |               |      |               |      |               |      |              |      |               |                        |       |             |      |              |      |              |      |              |      |              |      |              |                    |   |   |      |              |      |             |      |              |      |              |      |              |                        |      |               |      |               |      |               |      |               |      |              |      |               |                        |       |               |      |               |      |               |      |               |      |              |      |               |                        |       |             |      |              |      |              |      |              |      |              |      |              |                   |   |   |      |              |      |              |      |              |      |              |      |               |              |   |   |      |              |      |              |      |              |      |              |      |               |
| Prison 12                                                                                                                                                                                                                                                                                                 | -                                | -             | -             | -                     | -     | -              | -                | -             | -              | -              | -     | -              |                      |      |              |      |               |      |              |      |              |      |               |      |               |                  |      |              |      |               |      |              |      |              |      |              |      |              |                        |      |               |      |               |      |               |      |               |      |               |      |               |                        |       |               |      |               |      |              |      |              |      |               |      |               |                   |      |               |      |               |      |               |      |               |      |               |      |               |                       |      |               |       |               |      |               |      |               |      |               |      |               |                    |      |               |      |               |      |              |      |               |      |               |      |               |                     |      |              |      |               |      |               |      |               |      |               |      |               |                        |      |               |       |                |       |                |       |               |       |                |       |               |                        |       |               |       |               |      |               |      |               |      |               |      |               |                                |     |   |      |               |      |              |      |              |      |              |      |               |              |      |               |       |                |       |                |       |               |       |                |       |               |                       |      |               |       |                |       |                |       |               |       |                |       |               |                                |      |               |      |              |      |              |      |              |      |              |      |              |                        |      |               |      |              |      |              |      |              |      |              |      |              |                  |      |               |       |               |       |               |      |               |      |               |       |               |                        |      |               |       |               |       |               |      |               |      |               |       |               |                        |      |               |      |              |      |              |      |              |      |              |      |              |                |      |               |      |              |      |               |      |              |      |              |      |               |                        |      |               |      |               |      |               |      |               |      |              |      |               |                                |       |              |      |              |      |              |      |              |      |              |      |              |                     |      |               |      |              |      |              |      |              |      |              |      |              |                        |      |               |      |               |      |               |      |               |      |              |      |               |                        |       |               |      |              |      |              |      |              |      |              |      |              |                     |      |               |      |              |      |              |      |              |      |              |      |              |                     |      |               |      |              |      |               |      |              |      |              |      |               |                       |   |   |      |              |      |              |      |              |      |             |      |             |                    |      |              |      |              |      |              |      |             |      |              |      |             |          |      |              |      |              |      |              |      |              |      |              |      |              |                        |      |               |      |               |      |               |      |               |      |               |      |               |                        |       |               |      |              |      |              |      |              |      |              |      |              |                   |      |              |      |              |      |              |      |              |      |              |      |              |              |      |               |      |              |      |              |      |               |      |               |      |               |            |      |               |      |              |      |              |      |               |      |               |      |               |                                |      |               |      |              |      |              |      |              |      |              |      |              |           |   |   |      |              |      |              |      |              |      |              |      |              |                  |   |   |   |   |   |   |   |   |   |   |   |   |                                |      |               |      |              |      |              |      |             |      |             |      |              |                                |      |               |      |              |      |              |      |              |      |              |      |              |                  |      |               |      |              |      |               |      |              |      |              |      |               |                     |      |               |      |              |      |              |      |             |      |             |      |              |                    |      |               |      |              |      |              |      |              |      |              |      |              |       |      |               |      |              |      |               |      |              |      |              |      |               |                        |      |               |      |               |      |               |      |               |      |              |      |               |                        |       |             |      |              |      |              |      |              |      |              |      |              |                    |   |   |      |              |      |             |      |              |      |              |      |              |                        |      |               |      |               |      |               |      |               |      |              |      |               |                        |       |               |      |               |      |               |      |               |      |              |      |               |                        |       |             |      |              |      |              |      |              |      |              |      |              |                   |   |   |      |              |      |              |      |              |      |              |      |               |              |   |   |      |              |      |              |      |              |      |              |      |               |
| Prison 13                                                                                                                                                                                                                                                                                                 | -                                | -             | 18.53         | (6.28, 54.57)         | 11.62 | (4.15, 32.51)  | 8.17             | (3.52, 19.01) | 8.21           | (3.52, 19.12)  | 10.79 | (4.22, 27.62)  |                      |      |              |      |               |      |              |      |              |      |               |      |               |                  |      |              |      |               |      |              |      |              |      |              |      |              |                        |      |               |      |               |      |               |      |               |      |               |      |               |                        |       |               |      |               |      |              |      |              |      |               |      |               |                   |      |               |      |               |      |               |      |               |      |               |      |               |                       |      |               |       |               |      |               |      |               |      |               |      |               |                    |      |               |      |               |      |              |      |               |      |               |      |               |                     |      |              |      |               |      |               |      |               |      |               |      |               |                        |      |               |       |                |       |                |       |               |       |                |       |               |                        |       |               |       |               |      |               |      |               |      |               |      |               |                                |     |   |      |               |      |              |      |              |      |              |      |               |              |      |               |       |                |       |                |       |               |       |                |       |               |                       |      |               |       |                |       |                |       |               |       |                |       |               |                                |      |               |      |              |      |              |      |              |      |              |      |              |                        |      |               |      |              |      |              |      |              |      |              |      |              |                  |      |               |       |               |       |               |      |               |      |               |       |               |                        |      |               |       |               |       |               |      |               |      |               |       |               |                        |      |               |      |              |      |              |      |              |      |              |      |              |                |      |               |      |              |      |               |      |              |      |              |      |               |                        |      |               |      |               |      |               |      |               |      |              |      |               |                                |       |              |      |              |      |              |      |              |      |              |      |              |                     |      |               |      |              |      |              |      |              |      |              |      |              |                        |      |               |      |               |      |               |      |               |      |              |      |               |                        |       |               |      |              |      |              |      |              |      |              |      |              |                     |      |               |      |              |      |              |      |              |      |              |      |              |                     |      |               |      |              |      |               |      |              |      |              |      |               |                       |   |   |      |              |      |              |      |              |      |             |      |             |                    |      |              |      |              |      |              |      |             |      |              |      |             |          |      |              |      |              |      |              |      |              |      |              |      |              |                        |      |               |      |               |      |               |      |               |      |               |      |               |                        |       |               |      |              |      |              |      |              |      |              |      |              |                   |      |              |      |              |      |              |      |              |      |              |      |              |              |      |               |      |              |      |              |      |               |      |               |      |               |            |      |               |      |              |      |              |      |               |      |               |      |               |                                |      |               |      |              |      |              |      |              |      |              |      |              |           |   |   |      |              |      |              |      |              |      |              |      |              |                  |   |   |   |   |   |   |   |   |   |   |   |   |                                |      |               |      |              |      |              |      |             |      |             |      |              |                                |      |               |      |              |      |              |      |              |      |              |      |              |                  |      |               |      |              |      |               |      |              |      |              |      |               |                     |      |               |      |              |      |              |      |             |      |             |      |              |                    |      |               |      |              |      |              |      |              |      |              |      |              |       |      |               |      |              |      |               |      |              |      |              |      |               |                        |      |               |      |               |      |               |      |               |      |              |      |               |                        |       |             |      |              |      |              |      |              |      |              |      |              |                    |   |   |      |              |      |             |      |              |      |              |      |              |                        |      |               |      |               |      |               |      |               |      |              |      |               |                        |       |               |      |               |      |               |      |               |      |              |      |               |                        |       |             |      |              |      |              |      |              |      |              |      |              |                   |   |   |      |              |      |              |      |              |      |              |      |               |              |   |   |      |              |      |              |      |              |      |              |      |               |
| <b>Prison category</b>                                                                                                                                                                                                                                                                                    |                                  |               |               |                       |       |                |                  |               |                |                |       |                | A (comparator)       | 1.0  | -            | 1.0  | -             | 1.0  | -            | 1.0  | -            | 1.0  | -             | 1.0  | -             | B                | 0.09 | (0.01, 0.83) | 0.10 | (0.06, 0.17)  | 0.04 | (0.02, 0.08) | 0.15 | (0.09, 0.25) | 0.12 | (0.07, 0.2)  | 0.08 | (0.05, 0.15) | C                      | 0.33 | (0.08, 1.44)  | 0.14 | (0.06, 0.23)  | 0.19 | (0.11, 0.32)  | 0.31 | (0.19, 0.5)   | 0.27 | (0.17, 0.44)  | 0.13 | (0.08, 0.23)  | Closed                 | -     | -             | 0.21 | (0.12, 0.35)  | 0.16 | (0.09, 0.28) | 0.34 | (0.21, 0.56) | 0.27 | (0.16, 0.44)  | 0.24 | (0.14, 0.41)  | D                 | 1.12 | (0.12, 10.79) | 0.28 | (0.09, 0.87)  | 0.18 | (0.05, 0.66)  | 0.38 | (0.13, 1.12)  | 0.31 | (0.1, 0.91)   | 0.52 | (0.1, 1.02)   | YOH                   | -    | -             | -     | -             | -    | -             | -    | -             | -    | -             | -    | -             | <b>Gender</b>      |      |               |      |               |      |              |      |               |      |               |      |               | Female (comparator) | 1.0  | -            | 1.0  | -             | 1.0  | -             | 1.0  | -             | 1.0  | -             | 1.0  | -             | Male                   | -    | -             | 0.86  | (0.54, 1.37)   | 1.09  | (0.65, 1.83)   | 0.81  | (0.53, 1.23)  | 0.91  | (0.6, 1.39)    | 0.71  | (0.46, 1.1)   | <b>Age - years</b>     |       |               |       |               |      |               |      |               |      |               |      |               | 10 - <20                       | -   | - | -    | -             | -    | -            | -    | -            | -    | -            | -    | -             | 20 - <30     | -    | -             | 0.68  | (0.37, 1.22)   | 0.60  | (0.31, 1.16)   | 0.61  | (0.37, 0.99)  | 0.58  | (0.35, 0.95)   | 0.57  | (0.33, 0.98)  | 30 - <40 (comparator) | -    | -             | -     | -              | -     | -              | -     | -             | -     | -              | -     | -             | 40 - <50                       | 0.77 | (0.14, 4.27)  | 1.12 | (0.84, 2.09) | 1.24 | (0.76, 2.01) | 0.90 | (0.6, 1.35)  | 1.02 | (0.68, 1.52) | 0.76 | (0.48, 1.2)  | 50 - <60               | 1.46 | (0.26, 8.27)  | 2.27 | (1.31, 3.95) | 2.90 | (1.62, 4.8)  | 1.61 | (0.98, 2.7)  | 1.98 | (1.19, 3.3)  | 1.53 | (0.98, 2.07) | 60 - <70         | 3.22 | (0.33, 31.44) | 3.73  | (1.47, 9.47)  | 2.33  | (0.85, 6.42)  | 7.39 | (2.84, 19.21) | 7.36 | (2.83, 19.13) | 8.98  | (2.86, 28.18) | 70 - <80               | 5.38 | (0.52, 55.05) | 2.00  | (0.58, 6.87)  | 1.63  | (0.43, 6.19)  | 0.99 | (0.15, 2.32)  | 0.91 | (0.26, 3.16)  | 1.65  | (0.48, 5.62)  | 80 - <90               | -    | -             | -    | -            | -    | -            | -    | -            | -    | -            | -    | -            | 90 - <100      | -    | -             | -    | -            | -    | -             | -    | -            | -    | -            | -    | -             | 100 - <110             | -    | -             | -    | -             | -    | -             | -    | -             | -    | -            | -    | -             | <b>Length of Stay (months)</b> |       |              |      |              |      |              |      |              |      |              |      |              | <1                  | -    | -             | 0.73 | (0.32, 1.66) | 0.57 | (0.19, 1.74) | 0.70 | (0.35, 1.37) | 0.70 | (0.35, 1.37) | 0.93 | (0.44, 1.98) | 1-6 (comparator)       | -    | -             | -    | -             | -    | -             | -    | -             | -    | -            | -    | -             | 6-12                   | 2.86  | (0.25, 32.21) | 1.45 | (0.82, 2.56) | 1.66 | (0.85, 3.27) | 1.55 | (0.96, 2.5)  | 1.76 | (1.1, 2.83)  | 1.92 | (1.04, 2.74) | 12-24               | 2.97 | (0.26, 31.45) | 1.86 | (1.04, 3.33) | 3.31 | (1.69, 6.09) | 2.11 | (1.29, 3.46) | 2.11 | (1.29, 3.45) | 2.13 | (1.46, 3.08) | 24+                 | 6.26 | (0.72, 54.75) | 5.14 | (1.2, 8.93)  | 8.31 | (4.64, 14.88) | 4.94 | (3.11, 7.87) | 5.70 | (3.58, 9.07) | 6.95 | (4.13, 11.69) | <b>Ethnic Group</b>   |   |   |      |              |      |              |      |              |      |             |      |             | White (comparator) | -    | -            | -    | -            | -    | -            | -    | -           | -    | -            | -    | -           | Mixed    | -    | -            | 0.45 | (0.06, 3.63) | -    | -            | 0.54 | (0.11, 2.65) | 0.50 | (0.1, 2.48)  | 0.73 | (0.14, 3.76) | Asian or Asian British | 9.62 | (0.99, 91.54) | 8.07 | (3.05, 21.34) | 4.65 | (1.72, 12.88) | 4.66 | (1.74, 12.48) | 4.34 | (1.62, 11.6)  | 4.28 | (1.12, 16.46) | Black or Black British | 16.40 | (2.7, 99.6)   | 0.90 | (0.24, 3.33) | 2.46 | (0.82, 7.31) | 1.80 | (0.64, 3.87) | 1.23 | (0.41, 3.64) | 1.80 | (0.58, 5.64) | Chinese and Other | -    | -            | 2.69 | (0.81, 8.95) | 1.60 | (0.62, 4.3)  | 2.81 | (0.84, 9.36) | 2.63 | (0.78, 8.73) | 1.72 | (0.49, 6.04) | Unclassified | -    | -             | 2.45 | (0.65, 9.26) | 1.76 | (0.38, 8.21) | 1.51 | (0.39, 5.79)  | 1.41 | (0.37, 5.41)  | 2.60 | (0.64, 10.54) |            |      |               |      |              |      |              |      |               |      |               |      |               |                                |      |               |      |              |      |              |      |              |      |              |      |              |           |   |   |      |              |      |              |      |              |      |              |      |              |                  |   |   |   |   |   |   |   |   |   |   |   |   |                                |      |               |      |              |      |              |      |             |      |             |      |              |                                |      |               |      |              |      |              |      |              |      |              |      |              |                  |      |               |      |              |      |               |      |              |      |              |      |               |                     |      |               |      |              |      |              |      |             |      |             |      |              |                    |      |               |      |              |      |              |      |              |      |              |      |              |       |      |               |      |              |      |               |      |              |      |              |      |               |                        |      |               |      |               |      |               |      |               |      |              |      |               |                        |       |             |      |              |      |              |      |              |      |              |      |              |                    |   |   |      |              |      |             |      |              |      |              |      |              |                        |      |               |      |               |      |               |      |               |      |              |      |               |                        |       |               |      |               |      |               |      |               |      |              |      |               |                        |       |             |      |              |      |              |      |              |      |              |      |              |                   |   |   |      |              |      |              |      |              |      |              |      |               |              |   |   |      |              |      |              |      |              |      |              |      |               |
| A (comparator)                                                                                                                                                                                                                                                                                            | 1.0                              | -             | 1.0           | -                     | 1.0   | -              | 1.0              | -             | 1.0            | -              | 1.0   | -              |                      |      |              |      |               |      |              |      |              |      |               |      |               |                  |      |              |      |               |      |              |      |              |      |              |      |              |                        |      |               |      |               |      |               |      |               |      |               |      |               |                        |       |               |      |               |      |              |      |              |      |               |      |               |                   |      |               |      |               |      |               |      |               |      |               |      |               |                       |      |               |       |               |      |               |      |               |      |               |      |               |                    |      |               |      |               |      |              |      |               |      |               |      |               |                     |      |              |      |               |      |               |      |               |      |               |      |               |                        |      |               |       |                |       |                |       |               |       |                |       |               |                        |       |               |       |               |      |               |      |               |      |               |      |               |                                |     |   |      |               |      |              |      |              |      |              |      |               |              |      |               |       |                |       |                |       |               |       |                |       |               |                       |      |               |       |                |       |                |       |               |       |                |       |               |                                |      |               |      |              |      |              |      |              |      |              |      |              |                        |      |               |      |              |      |              |      |              |      |              |      |              |                  |      |               |       |               |       |               |      |               |      |               |       |               |                        |      |               |       |               |       |               |      |               |      |               |       |               |                        |      |               |      |              |      |              |      |              |      |              |      |              |                |      |               |      |              |      |               |      |              |      |              |      |               |                        |      |               |      |               |      |               |      |               |      |              |      |               |                                |       |              |      |              |      |              |      |              |      |              |      |              |                     |      |               |      |              |      |              |      |              |      |              |      |              |                        |      |               |      |               |      |               |      |               |      |              |      |               |                        |       |               |      |              |      |              |      |              |      |              |      |              |                     |      |               |      |              |      |              |      |              |      |              |      |              |                     |      |               |      |              |      |               |      |              |      |              |      |               |                       |   |   |      |              |      |              |      |              |      |             |      |             |                    |      |              |      |              |      |              |      |             |      |              |      |             |          |      |              |      |              |      |              |      |              |      |              |      |              |                        |      |               |      |               |      |               |      |               |      |               |      |               |                        |       |               |      |              |      |              |      |              |      |              |      |              |                   |      |              |      |              |      |              |      |              |      |              |      |              |              |      |               |      |              |      |              |      |               |      |               |      |               |            |      |               |      |              |      |              |      |               |      |               |      |               |                                |      |               |      |              |      |              |      |              |      |              |      |              |           |   |   |      |              |      |              |      |              |      |              |      |              |                  |   |   |   |   |   |   |   |   |   |   |   |   |                                |      |               |      |              |      |              |      |             |      |             |      |              |                                |      |               |      |              |      |              |      |              |      |              |      |              |                  |      |               |      |              |      |               |      |              |      |              |      |               |                     |      |               |      |              |      |              |      |             |      |             |      |              |                    |      |               |      |              |      |              |      |              |      |              |      |              |       |      |               |      |              |      |               |      |              |      |              |      |               |                        |      |               |      |               |      |               |      |               |      |              |      |               |                        |       |             |      |              |      |              |      |              |      |              |      |              |                    |   |   |      |              |      |             |      |              |      |              |      |              |                        |      |               |      |               |      |               |      |               |      |              |      |               |                        |       |               |      |               |      |               |      |               |      |              |      |               |                        |       |             |      |              |      |              |      |              |      |              |      |              |                   |   |   |      |              |      |              |      |              |      |              |      |               |              |   |   |      |              |      |              |      |              |      |              |      |               |
| B                                                                                                                                                                                                                                                                                                         | 0.09                             | (0.01, 0.83)  | 0.10          | (0.06, 0.17)          | 0.04  | (0.02, 0.08)   | 0.15             | (0.09, 0.25)  | 0.12           | (0.07, 0.2)    | 0.08  | (0.05, 0.15)   |                      |      |              |      |               |      |              |      |              |      |               |      |               |                  |      |              |      |               |      |              |      |              |      |              |      |              |                        |      |               |      |               |      |               |      |               |      |               |      |               |                        |       |               |      |               |      |              |      |              |      |               |      |               |                   |      |               |      |               |      |               |      |               |      |               |      |               |                       |      |               |       |               |      |               |      |               |      |               |      |               |                    |      |               |      |               |      |              |      |               |      |               |      |               |                     |      |              |      |               |      |               |      |               |      |               |      |               |                        |      |               |       |                |       |                |       |               |       |                |       |               |                        |       |               |       |               |      |               |      |               |      |               |      |               |                                |     |   |      |               |      |              |      |              |      |              |      |               |              |      |               |       |                |       |                |       |               |       |                |       |               |                       |      |               |       |                |       |                |       |               |       |                |       |               |                                |      |               |      |              |      |              |      |              |      |              |      |              |                        |      |               |      |              |      |              |      |              |      |              |      |              |                  |      |               |       |               |       |               |      |               |      |               |       |               |                        |      |               |       |               |       |               |      |               |      |               |       |               |                        |      |               |      |              |      |              |      |              |      |              |      |              |                |      |               |      |              |      |               |      |              |      |              |      |               |                        |      |               |      |               |      |               |      |               |      |              |      |               |                                |       |              |      |              |      |              |      |              |      |              |      |              |                     |      |               |      |              |      |              |      |              |      |              |      |              |                        |      |               |      |               |      |               |      |               |      |              |      |               |                        |       |               |      |              |      |              |      |              |      |              |      |              |                     |      |               |      |              |      |              |      |              |      |              |      |              |                     |      |               |      |              |      |               |      |              |      |              |      |               |                       |   |   |      |              |      |              |      |              |      |             |      |             |                    |      |              |      |              |      |              |      |             |      |              |      |             |          |      |              |      |              |      |              |      |              |      |              |      |              |                        |      |               |      |               |      |               |      |               |      |               |      |               |                        |       |               |      |              |      |              |      |              |      |              |      |              |                   |      |              |      |              |      |              |      |              |      |              |      |              |              |      |               |      |              |      |              |      |               |      |               |      |               |            |      |               |      |              |      |              |      |               |      |               |      |               |                                |      |               |      |              |      |              |      |              |      |              |      |              |           |   |   |      |              |      |              |      |              |      |              |      |              |                  |   |   |   |   |   |   |   |   |   |   |   |   |                                |      |               |      |              |      |              |      |             |      |             |      |              |                                |      |               |      |              |      |              |      |              |      |              |      |              |                  |      |               |      |              |      |               |      |              |      |              |      |               |                     |      |               |      |              |      |              |      |             |      |             |      |              |                    |      |               |      |              |      |              |      |              |      |              |      |              |       |      |               |      |              |      |               |      |              |      |              |      |               |                        |      |               |      |               |      |               |      |               |      |              |      |               |                        |       |             |      |              |      |              |      |              |      |              |      |              |                    |   |   |      |              |      |             |      |              |      |              |      |              |                        |      |               |      |               |      |               |      |               |      |              |      |               |                        |       |               |      |               |      |               |      |               |      |              |      |               |                        |       |             |      |              |      |              |      |              |      |              |      |              |                   |   |   |      |              |      |              |      |              |      |              |      |               |              |   |   |      |              |      |              |      |              |      |              |      |               |
| C                                                                                                                                                                                                                                                                                                         | 0.33                             | (0.08, 1.44)  | 0.14          | (0.06, 0.23)          | 0.19  | (0.11, 0.32)   | 0.31             | (0.19, 0.5)   | 0.27           | (0.17, 0.44)   | 0.13  | (0.08, 0.23)   |                      |      |              |      |               |      |              |      |              |      |               |      |               |                  |      |              |      |               |      |              |      |              |      |              |      |              |                        |      |               |      |               |      |               |      |               |      |               |      |               |                        |       |               |      |               |      |              |      |              |      |               |      |               |                   |      |               |      |               |      |               |      |               |      |               |      |               |                       |      |               |       |               |      |               |      |               |      |               |      |               |                    |      |               |      |               |      |              |      |               |      |               |      |               |                     |      |              |      |               |      |               |      |               |      |               |      |               |                        |      |               |       |                |       |                |       |               |       |                |       |               |                        |       |               |       |               |      |               |      |               |      |               |      |               |                                |     |   |      |               |      |              |      |              |      |              |      |               |              |      |               |       |                |       |                |       |               |       |                |       |               |                       |      |               |       |                |       |                |       |               |       |                |       |               |                                |      |               |      |              |      |              |      |              |      |              |      |              |                        |      |               |      |              |      |              |      |              |      |              |      |              |                  |      |               |       |               |       |               |      |               |      |               |       |               |                        |      |               |       |               |       |               |      |               |      |               |       |               |                        |      |               |      |              |      |              |      |              |      |              |      |              |                |      |               |      |              |      |               |      |              |      |              |      |               |                        |      |               |      |               |      |               |      |               |      |              |      |               |                                |       |              |      |              |      |              |      |              |      |              |      |              |                     |      |               |      |              |      |              |      |              |      |              |      |              |                        |      |               |      |               |      |               |      |               |      |              |      |               |                        |       |               |      |              |      |              |      |              |      |              |      |              |                     |      |               |      |              |      |              |      |              |      |              |      |              |                     |      |               |      |              |      |               |      |              |      |              |      |               |                       |   |   |      |              |      |              |      |              |      |             |      |             |                    |      |              |      |              |      |              |      |             |      |              |      |             |          |      |              |      |              |      |              |      |              |      |              |      |              |                        |      |               |      |               |      |               |      |               |      |               |      |               |                        |       |               |      |              |      |              |      |              |      |              |      |              |                   |      |              |      |              |      |              |      |              |      |              |      |              |              |      |               |      |              |      |              |      |               |      |               |      |               |            |      |               |      |              |      |              |      |               |      |               |      |               |                                |      |               |      |              |      |              |      |              |      |              |      |              |           |   |   |      |              |      |              |      |              |      |              |      |              |                  |   |   |   |   |   |   |   |   |   |   |   |   |                                |      |               |      |              |      |              |      |             |      |             |      |              |                                |      |               |      |              |      |              |      |              |      |              |      |              |                  |      |               |      |              |      |               |      |              |      |              |      |               |                     |      |               |      |              |      |              |      |             |      |             |      |              |                    |      |               |      |              |      |              |      |              |      |              |      |              |       |      |               |      |              |      |               |      |              |      |              |      |               |                        |      |               |      |               |      |               |      |               |      |              |      |               |                        |       |             |      |              |      |              |      |              |      |              |      |              |                    |   |   |      |              |      |             |      |              |      |              |      |              |                        |      |               |      |               |      |               |      |               |      |              |      |               |                        |       |               |      |               |      |               |      |               |      |              |      |               |                        |       |             |      |              |      |              |      |              |      |              |      |              |                   |   |   |      |              |      |              |      |              |      |              |      |               |              |   |   |      |              |      |              |      |              |      |              |      |               |
| Closed                                                                                                                                                                                                                                                                                                    | -                                | -             | 0.21          | (0.12, 0.35)          | 0.16  | (0.09, 0.28)   | 0.34             | (0.21, 0.56)  | 0.27           | (0.16, 0.44)   | 0.24  | (0.14, 0.41)   |                      |      |              |      |               |      |              |      |              |      |               |      |               |                  |      |              |      |               |      |              |      |              |      |              |      |              |                        |      |               |      |               |      |               |      |               |      |               |      |               |                        |       |               |      |               |      |              |      |              |      |               |      |               |                   |      |               |      |               |      |               |      |               |      |               |      |               |                       |      |               |       |               |      |               |      |               |      |               |      |               |                    |      |               |      |               |      |              |      |               |      |               |      |               |                     |      |              |      |               |      |               |      |               |      |               |      |               |                        |      |               |       |                |       |                |       |               |       |                |       |               |                        |       |               |       |               |      |               |      |               |      |               |      |               |                                |     |   |      |               |      |              |      |              |      |              |      |               |              |      |               |       |                |       |                |       |               |       |                |       |               |                       |      |               |       |                |       |                |       |               |       |                |       |               |                                |      |               |      |              |      |              |      |              |      |              |      |              |                        |      |               |      |              |      |              |      |              |      |              |      |              |                  |      |               |       |               |       |               |      |               |      |               |       |               |                        |      |               |       |               |       |               |      |               |      |               |       |               |                        |      |               |      |              |      |              |      |              |      |              |      |              |                |      |               |      |              |      |               |      |              |      |              |      |               |                        |      |               |      |               |      |               |      |               |      |              |      |               |                                |       |              |      |              |      |              |      |              |      |              |      |              |                     |      |               |      |              |      |              |      |              |      |              |      |              |                        |      |               |      |               |      |               |      |               |      |              |      |               |                        |       |               |      |              |      |              |      |              |      |              |      |              |                     |      |               |      |              |      |              |      |              |      |              |      |              |                     |      |               |      |              |      |               |      |              |      |              |      |               |                       |   |   |      |              |      |              |      |              |      |             |      |             |                    |      |              |      |              |      |              |      |             |      |              |      |             |          |      |              |      |              |      |              |      |              |      |              |      |              |                        |      |               |      |               |      |               |      |               |      |               |      |               |                        |       |               |      |              |      |              |      |              |      |              |      |              |                   |      |              |      |              |      |              |      |              |      |              |      |              |              |      |               |      |              |      |              |      |               |      |               |      |               |            |      |               |      |              |      |              |      |               |      |               |      |               |                                |      |               |      |              |      |              |      |              |      |              |      |              |           |   |   |      |              |      |              |      |              |      |              |      |              |                  |   |   |   |   |   |   |   |   |   |   |   |   |                                |      |               |      |              |      |              |      |             |      |             |      |              |                                |      |               |      |              |      |              |      |              |      |              |      |              |                  |      |               |      |              |      |               |      |              |      |              |      |               |                     |      |               |      |              |      |              |      |             |      |             |      |              |                    |      |               |      |              |      |              |      |              |      |              |      |              |       |      |               |      |              |      |               |      |              |      |              |      |               |                        |      |               |      |               |      |               |      |               |      |              |      |               |                        |       |             |      |              |      |              |      |              |      |              |      |              |                    |   |   |      |              |      |             |      |              |      |              |      |              |                        |      |               |      |               |      |               |      |               |      |              |      |               |                        |       |               |      |               |      |               |      |               |      |              |      |               |                        |       |             |      |              |      |              |      |              |      |              |      |              |                   |   |   |      |              |      |              |      |              |      |              |      |               |              |   |   |      |              |      |              |      |              |      |              |      |               |
| D                                                                                                                                                                                                                                                                                                         | 1.12                             | (0.12, 10.79) | 0.28          | (0.09, 0.87)          | 0.18  | (0.05, 0.66)   | 0.38             | (0.13, 1.12)  | 0.31           | (0.1, 0.91)    | 0.52  | (0.1, 1.02)    |                      |      |              |      |               |      |              |      |              |      |               |      |               |                  |      |              |      |               |      |              |      |              |      |              |      |              |                        |      |               |      |               |      |               |      |               |      |               |      |               |                        |       |               |      |               |      |              |      |              |      |               |      |               |                   |      |               |      |               |      |               |      |               |      |               |      |               |                       |      |               |       |               |      |               |      |               |      |               |      |               |                    |      |               |      |               |      |              |      |               |      |               |      |               |                     |      |              |      |               |      |               |      |               |      |               |      |               |                        |      |               |       |                |       |                |       |               |       |                |       |               |                        |       |               |       |               |      |               |      |               |      |               |      |               |                                |     |   |      |               |      |              |      |              |      |              |      |               |              |      |               |       |                |       |                |       |               |       |                |       |               |                       |      |               |       |                |       |                |       |               |       |                |       |               |                                |      |               |      |              |      |              |      |              |      |              |      |              |                        |      |               |      |              |      |              |      |              |      |              |      |              |                  |      |               |       |               |       |               |      |               |      |               |       |               |                        |      |               |       |               |       |               |      |               |      |               |       |               |                        |      |               |      |              |      |              |      |              |      |              |      |              |                |      |               |      |              |      |               |      |              |      |              |      |               |                        |      |               |      |               |      |               |      |               |      |              |      |               |                                |       |              |      |              |      |              |      |              |      |              |      |              |                     |      |               |      |              |      |              |      |              |      |              |      |              |                        |      |               |      |               |      |               |      |               |      |              |      |               |                        |       |               |      |              |      |              |      |              |      |              |      |              |                     |      |               |      |              |      |              |      |              |      |              |      |              |                     |      |               |      |              |      |               |      |              |      |              |      |               |                       |   |   |      |              |      |              |      |              |      |             |      |             |                    |      |              |      |              |      |              |      |             |      |              |      |             |          |      |              |      |              |      |              |      |              |      |              |      |              |                        |      |               |      |               |      |               |      |               |      |               |      |               |                        |       |               |      |              |      |              |      |              |      |              |      |              |                   |      |              |      |              |      |              |      |              |      |              |      |              |              |      |               |      |              |      |              |      |               |      |               |      |               |            |      |               |      |              |      |              |      |               |      |               |      |               |                                |      |               |      |              |      |              |      |              |      |              |      |              |           |   |   |      |              |      |              |      |              |      |              |      |              |                  |   |   |   |   |   |   |   |   |   |   |   |   |                                |      |               |      |              |      |              |      |             |      |             |      |              |                                |      |               |      |              |      |              |      |              |      |              |      |              |                  |      |               |      |              |      |               |      |              |      |              |      |               |                     |      |               |      |              |      |              |      |             |      |             |      |              |                    |      |               |      |              |      |              |      |              |      |              |      |              |       |      |               |      |              |      |               |      |              |      |              |      |               |                        |      |               |      |               |      |               |      |               |      |              |      |               |                        |       |             |      |              |      |              |      |              |      |              |      |              |                    |   |   |      |              |      |             |      |              |      |              |      |              |                        |      |               |      |               |      |               |      |               |      |              |      |               |                        |       |               |      |               |      |               |      |               |      |              |      |               |                        |       |             |      |              |      |              |      |              |      |              |      |              |                   |   |   |      |              |      |              |      |              |      |              |      |               |              |   |   |      |              |      |              |      |              |      |              |      |               |
| YOH                                                                                                                                                                                                                                                                                                       | -                                | -             | -             | -                     | -     | -              | -                | -             | -              | -              | -     | -              |                      |      |              |      |               |      |              |      |              |      |               |      |               |                  |      |              |      |               |      |              |      |              |      |              |      |              |                        |      |               |      |               |      |               |      |               |      |               |      |               |                        |       |               |      |               |      |              |      |              |      |               |      |               |                   |      |               |      |               |      |               |      |               |      |               |      |               |                       |      |               |       |               |      |               |      |               |      |               |      |               |                    |      |               |      |               |      |              |      |               |      |               |      |               |                     |      |              |      |               |      |               |      |               |      |               |      |               |                        |      |               |       |                |       |                |       |               |       |                |       |               |                        |       |               |       |               |      |               |      |               |      |               |      |               |                                |     |   |      |               |      |              |      |              |      |              |      |               |              |      |               |       |                |       |                |       |               |       |                |       |               |                       |      |               |       |                |       |                |       |               |       |                |       |               |                                |      |               |      |              |      |              |      |              |      |              |      |              |                        |      |               |      |              |      |              |      |              |      |              |      |              |                  |      |               |       |               |       |               |      |               |      |               |       |               |                        |      |               |       |               |       |               |      |               |      |               |       |               |                        |      |               |      |              |      |              |      |              |      |              |      |              |                |      |               |      |              |      |               |      |              |      |              |      |               |                        |      |               |      |               |      |               |      |               |      |              |      |               |                                |       |              |      |              |      |              |      |              |      |              |      |              |                     |      |               |      |              |      |              |      |              |      |              |      |              |                        |      |               |      |               |      |               |      |               |      |              |      |               |                        |       |               |      |              |      |              |      |              |      |              |      |              |                     |      |               |      |              |      |              |      |              |      |              |      |              |                     |      |               |      |              |      |               |      |              |      |              |      |               |                       |   |   |      |              |      |              |      |              |      |             |      |             |                    |      |              |      |              |      |              |      |             |      |              |      |             |          |      |              |      |              |      |              |      |              |      |              |      |              |                        |      |               |      |               |      |               |      |               |      |               |      |               |                        |       |               |      |              |      |              |      |              |      |              |      |              |                   |      |              |      |              |      |              |      |              |      |              |      |              |              |      |               |      |              |      |              |      |               |      |               |      |               |            |      |               |      |              |      |              |      |               |      |               |      |               |                                |      |               |      |              |      |              |      |              |      |              |      |              |           |   |   |      |              |      |              |      |              |      |              |      |              |                  |   |   |   |   |   |   |   |   |   |   |   |   |                                |      |               |      |              |      |              |      |             |      |             |      |              |                                |      |               |      |              |      |              |      |              |      |              |      |              |                  |      |               |      |              |      |               |      |              |      |              |      |               |                     |      |               |      |              |      |              |      |             |      |             |      |              |                    |      |               |      |              |      |              |      |              |      |              |      |              |       |      |               |      |              |      |               |      |              |      |              |      |               |                        |      |               |      |               |      |               |      |               |      |              |      |               |                        |       |             |      |              |      |              |      |              |      |              |      |              |                    |   |   |      |              |      |             |      |              |      |              |      |              |                        |      |               |      |               |      |               |      |               |      |              |      |               |                        |       |               |      |               |      |               |      |               |      |              |      |               |                        |       |             |      |              |      |              |      |              |      |              |      |              |                   |   |   |      |              |      |              |      |              |      |              |      |               |              |   |   |      |              |      |              |      |              |      |              |      |               |
| <b>Gender</b>                                                                                                                                                                                                                                                                                             |                                  |               |               |                       |       |                |                  |               |                |                |       |                | Female (comparator)  | 1.0  | -            | 1.0  | -             | 1.0  | -            | 1.0  | -            | 1.0  | -             | 1.0  | -             | Male             | -    | -            | 0.86 | (0.54, 1.37)  | 1.09 | (0.65, 1.83) | 0.81 | (0.53, 1.23) | 0.91 | (0.6, 1.39)  | 0.71 | (0.46, 1.1)  | <b>Age - years</b>     |      |               |      |               |      |               |      |               |      |               |      |               | 10 - <20               | -     | -             | -    | -             | -    | -            | -    | -            | -    | -             | -    | -             | 20 - <30          | -    | -             | 0.68 | (0.37, 1.22)  | 0.60 | (0.31, 1.16)  | 0.61 | (0.37, 0.99)  | 0.58 | (0.35, 0.95)  | 0.57 | (0.33, 0.98)  | 30 - <40 (comparator) | -    | -             | -     | -             | -    | -             | -    | -             | -    | -             | -    | -             | 40 - <50           | 0.77 | (0.14, 4.27)  | 1.12 | (0.84, 2.09)  | 1.24 | (0.76, 2.01) | 0.90 | (0.6, 1.35)   | 1.02 | (0.68, 1.52)  | 0.76 | (0.48, 1.2)   | 50 - <60            | 1.46 | (0.26, 8.27) | 2.27 | (1.31, 3.95)  | 2.90 | (1.62, 4.8)   | 1.61 | (0.98, 2.7)   | 1.98 | (1.19, 3.3)   | 1.53 | (0.98, 2.07)  | 60 - <70               | 3.22 | (0.33, 31.44) | 3.73  | (1.47, 9.47)   | 2.33  | (0.85, 6.42)   | 7.39  | (2.84, 19.21) | 7.36  | (2.83, 19.13)  | 8.98  | (2.86, 28.18) | 70 - <80               | 5.38  | (0.52, 55.05) | 2.00  | (0.58, 6.87)  | 1.63 | (0.43, 6.19)  | 0.99 | (0.15, 2.32)  | 0.91 | (0.26, 3.16)  | 1.65 | (0.48, 5.62)  | 80 - <90                       | -   | - | -    | -             | -    | -            | -    | -            | -    | -            | -    | -             | 90 - <100    | -    | -             | -     | -              | -     | -              | -     | -             | -     | -              | -     | -             | 100 - <110            | -    | -             | -     | -              | -     | -              | -     | -             | -     | -              | -     | -             | <b>Length of Stay (months)</b> |      |               |      |              |      |              |      |              |      |              |      |              | <1                     | -    | -             | 0.73 | (0.32, 1.66) | 0.57 | (0.19, 1.74) | 0.70 | (0.35, 1.37) | 0.70 | (0.35, 1.37) | 0.93 | (0.44, 1.98) | 1-6 (comparator) | -    | -             | -     | -             | -     | -             | -    | -             | -    | -             | -     | -             | 6-12                   | 2.86 | (0.25, 32.21) | 1.45  | (0.82, 2.56)  | 1.66  | (0.85, 3.27)  | 1.55 | (0.96, 2.5)   | 1.76 | (1.1, 2.83)   | 1.92  | (1.04, 2.74)  | 12-24                  | 2.97 | (0.26, 31.45) | 1.86 | (1.04, 3.33) | 3.31 | (1.69, 6.09) | 2.11 | (1.29, 3.46) | 2.11 | (1.29, 3.45) | 2.13 | (1.46, 3.08) | 24+            | 6.26 | (0.72, 54.75) | 5.14 | (1.2, 8.93)  | 8.31 | (4.64, 14.88) | 4.94 | (3.11, 7.87) | 5.70 | (3.58, 9.07) | 6.95 | (4.13, 11.69) | <b>Ethnic Group</b>    |      |               |      |               |      |               |      |               |      |              |      |               | White (comparator)             | -     | -            | -    | -            | -    | -            | -    | -            | -    | -            | -    | -            | Mixed               | -    | -             | 0.45 | (0.06, 3.63) | -    | -            | 0.54 | (0.11, 2.65) | 0.50 | (0.1, 2.48)  | 0.73 | (0.14, 3.76) | Asian or Asian British | 9.62 | (0.99, 91.54) | 8.07 | (3.05, 21.34) | 4.65 | (1.72, 12.88) | 4.66 | (1.74, 12.48) | 4.34 | (1.62, 11.6) | 4.28 | (1.12, 16.46) | Black or Black British | 16.40 | (2.7, 99.6)   | 0.90 | (0.24, 3.33) | 2.46 | (0.82, 7.31) | 1.80 | (0.64, 3.87) | 1.23 | (0.41, 3.64) | 1.80 | (0.58, 5.64) | Chinese and Other   | -    | -             | 2.69 | (0.81, 8.95) | 1.60 | (0.62, 4.3)  | 2.81 | (0.84, 9.36) | 2.63 | (0.78, 8.73) | 1.72 | (0.49, 6.04) | Unclassified        | -    | -             | 2.45 | (0.65, 9.26) | 1.76 | (0.38, 8.21)  | 1.51 | (0.39, 5.79) | 1.41 | (0.37, 5.41) | 2.60 | (0.64, 10.54) |                       |   |   |      |              |      |              |      |              |      |             |      |             |                    |      |              |      |              |      |              |      |             |      |              |      |             |          |      |              |      |              |      |              |      |              |      |              |      |              |                        |      |               |      |               |      |               |      |               |      |               |      |               |                        |       |               |      |              |      |              |      |              |      |              |      |              |                   |      |              |      |              |      |              |      |              |      |              |      |              |              |      |               |      |              |      |              |      |               |      |               |      |               |            |      |               |      |              |      |              |      |               |      |               |      |               |                                |      |               |      |              |      |              |      |              |      |              |      |              |           |   |   |      |              |      |              |      |              |      |              |      |              |                  |   |   |   |   |   |   |   |   |   |   |   |   |                                |      |               |      |              |      |              |      |             |      |             |      |              |                                |      |               |      |              |      |              |      |              |      |              |      |              |                  |      |               |      |              |      |               |      |              |      |              |      |               |                     |      |               |      |              |      |              |      |             |      |             |      |              |                    |      |               |      |              |      |              |      |              |      |              |      |              |       |      |               |      |              |      |               |      |              |      |              |      |               |                        |      |               |      |               |      |               |      |               |      |              |      |               |                        |       |             |      |              |      |              |      |              |      |              |      |              |                    |   |   |      |              |      |             |      |              |      |              |      |              |                        |      |               |      |               |      |               |      |               |      |              |      |               |                        |       |               |      |               |      |               |      |               |      |              |      |               |                        |       |             |      |              |      |              |      |              |      |              |      |              |                   |   |   |      |              |      |              |      |              |      |              |      |               |              |   |   |      |              |      |              |      |              |      |              |      |               |
| Female (comparator)                                                                                                                                                                                                                                                                                       | 1.0                              | -             | 1.0           | -                     | 1.0   | -              | 1.0              | -             | 1.0            | -              | 1.0   | -              |                      |      |              |      |               |      |              |      |              |      |               |      |               |                  |      |              |      |               |      |              |      |              |      |              |      |              |                        |      |               |      |               |      |               |      |               |      |               |      |               |                        |       |               |      |               |      |              |      |              |      |               |      |               |                   |      |               |      |               |      |               |      |               |      |               |      |               |                       |      |               |       |               |      |               |      |               |      |               |      |               |                    |      |               |      |               |      |              |      |               |      |               |      |               |                     |      |              |      |               |      |               |      |               |      |               |      |               |                        |      |               |       |                |       |                |       |               |       |                |       |               |                        |       |               |       |               |      |               |      |               |      |               |      |               |                                |     |   |      |               |      |              |      |              |      |              |      |               |              |      |               |       |                |       |                |       |               |       |                |       |               |                       |      |               |       |                |       |                |       |               |       |                |       |               |                                |      |               |      |              |      |              |      |              |      |              |      |              |                        |      |               |      |              |      |              |      |              |      |              |      |              |                  |      |               |       |               |       |               |      |               |      |               |       |               |                        |      |               |       |               |       |               |      |               |      |               |       |               |                        |      |               |      |              |      |              |      |              |      |              |      |              |                |      |               |      |              |      |               |      |              |      |              |      |               |                        |      |               |      |               |      |               |      |               |      |              |      |               |                                |       |              |      |              |      |              |      |              |      |              |      |              |                     |      |               |      |              |      |              |      |              |      |              |      |              |                        |      |               |      |               |      |               |      |               |      |              |      |               |                        |       |               |      |              |      |              |      |              |      |              |      |              |                     |      |               |      |              |      |              |      |              |      |              |      |              |                     |      |               |      |              |      |               |      |              |      |              |      |               |                       |   |   |      |              |      |              |      |              |      |             |      |             |                    |      |              |      |              |      |              |      |             |      |              |      |             |          |      |              |      |              |      |              |      |              |      |              |      |              |                        |      |               |      |               |      |               |      |               |      |               |      |               |                        |       |               |      |              |      |              |      |              |      |              |      |              |                   |      |              |      |              |      |              |      |              |      |              |      |              |              |      |               |      |              |      |              |      |               |      |               |      |               |            |      |               |      |              |      |              |      |               |      |               |      |               |                                |      |               |      |              |      |              |      |              |      |              |      |              |           |   |   |      |              |      |              |      |              |      |              |      |              |                  |   |   |   |   |   |   |   |   |   |   |   |   |                                |      |               |      |              |      |              |      |             |      |             |      |              |                                |      |               |      |              |      |              |      |              |      |              |      |              |                  |      |               |      |              |      |               |      |              |      |              |      |               |                     |      |               |      |              |      |              |      |             |      |             |      |              |                    |      |               |      |              |      |              |      |              |      |              |      |              |       |      |               |      |              |      |               |      |              |      |              |      |               |                        |      |               |      |               |      |               |      |               |      |              |      |               |                        |       |             |      |              |      |              |      |              |      |              |      |              |                    |   |   |      |              |      |             |      |              |      |              |      |              |                        |      |               |      |               |      |               |      |               |      |              |      |               |                        |       |               |      |               |      |               |      |               |      |              |      |               |                        |       |             |      |              |      |              |      |              |      |              |      |              |                   |   |   |      |              |      |              |      |              |      |              |      |               |              |   |   |      |              |      |              |      |              |      |              |      |               |
| Male                                                                                                                                                                                                                                                                                                      | -                                | -             | 0.86          | (0.54, 1.37)          | 1.09  | (0.65, 1.83)   | 0.81             | (0.53, 1.23)  | 0.91           | (0.6, 1.39)    | 0.71  | (0.46, 1.1)    |                      |      |              |      |               |      |              |      |              |      |               |      |               |                  |      |              |      |               |      |              |      |              |      |              |      |              |                        |      |               |      |               |      |               |      |               |      |               |      |               |                        |       |               |      |               |      |              |      |              |      |               |      |               |                   |      |               |      |               |      |               |      |               |      |               |      |               |                       |      |               |       |               |      |               |      |               |      |               |      |               |                    |      |               |      |               |      |              |      |               |      |               |      |               |                     |      |              |      |               |      |               |      |               |      |               |      |               |                        |      |               |       |                |       |                |       |               |       |                |       |               |                        |       |               |       |               |      |               |      |               |      |               |      |               |                                |     |   |      |               |      |              |      |              |      |              |      |               |              |      |               |       |                |       |                |       |               |       |                |       |               |                       |      |               |       |                |       |                |       |               |       |                |       |               |                                |      |               |      |              |      |              |      |              |      |              |      |              |                        |      |               |      |              |      |              |      |              |      |              |      |              |                  |      |               |       |               |       |               |      |               |      |               |       |               |                        |      |               |       |               |       |               |      |               |      |               |       |               |                        |      |               |      |              |      |              |      |              |      |              |      |              |                |      |               |      |              |      |               |      |              |      |              |      |               |                        |      |               |      |               |      |               |      |               |      |              |      |               |                                |       |              |      |              |      |              |      |              |      |              |      |              |                     |      |               |      |              |      |              |      |              |      |              |      |              |                        |      |               |      |               |      |               |      |               |      |              |      |               |                        |       |               |      |              |      |              |      |              |      |              |      |              |                     |      |               |      |              |      |              |      |              |      |              |      |              |                     |      |               |      |              |      |               |      |              |      |              |      |               |                       |   |   |      |              |      |              |      |              |      |             |      |             |                    |      |              |      |              |      |              |      |             |      |              |      |             |          |      |              |      |              |      |              |      |              |      |              |      |              |                        |      |               |      |               |      |               |      |               |      |               |      |               |                        |       |               |      |              |      |              |      |              |      |              |      |              |                   |      |              |      |              |      |              |      |              |      |              |      |              |              |      |               |      |              |      |              |      |               |      |               |      |               |            |      |               |      |              |      |              |      |               |      |               |      |               |                                |      |               |      |              |      |              |      |              |      |              |      |              |           |   |   |      |              |      |              |      |              |      |              |      |              |                  |   |   |   |   |   |   |   |   |   |   |   |   |                                |      |               |      |              |      |              |      |             |      |             |      |              |                                |      |               |      |              |      |              |      |              |      |              |      |              |                  |      |               |      |              |      |               |      |              |      |              |      |               |                     |      |               |      |              |      |              |      |             |      |             |      |              |                    |      |               |      |              |      |              |      |              |      |              |      |              |       |      |               |      |              |      |               |      |              |      |              |      |               |                        |      |               |      |               |      |               |      |               |      |              |      |               |                        |       |             |      |              |      |              |      |              |      |              |      |              |                    |   |   |      |              |      |             |      |              |      |              |      |              |                        |      |               |      |               |      |               |      |               |      |              |      |               |                        |       |               |      |               |      |               |      |               |      |              |      |               |                        |       |             |      |              |      |              |      |              |      |              |      |              |                   |   |   |      |              |      |              |      |              |      |              |      |               |              |   |   |      |              |      |              |      |              |      |              |      |               |
| <b>Age - years</b>                                                                                                                                                                                                                                                                                        |                                  |               |               |                       |       |                |                  |               |                |                |       |                | 10 - <20             | -    | -            | -    | -             | -    | -            | -    | -            | -    | -             | -    | -             | 20 - <30         | -    | -            | 0.68 | (0.37, 1.22)  | 0.60 | (0.31, 1.16) | 0.61 | (0.37, 0.99) | 0.58 | (0.35, 0.95) | 0.57 | (0.33, 0.98) | 30 - <40 (comparator)  | -    | -             | -    | -             | -    | -             | -    | -             | -    | -             | -    | -             | 40 - <50               | 0.77  | (0.14, 4.27)  | 1.12 | (0.84, 2.09)  | 1.24 | (0.76, 2.01) | 0.90 | (0.6, 1.35)  | 1.02 | (0.68, 1.52)  | 0.76 | (0.48, 1.2)   | 50 - <60          | 1.46 | (0.26, 8.27)  | 2.27 | (1.31, 3.95)  | 2.90 | (1.62, 4.8)   | 1.61 | (0.98, 2.7)   | 1.98 | (1.19, 3.3)   | 1.53 | (0.98, 2.07)  | 60 - <70              | 3.22 | (0.33, 31.44) | 3.73  | (1.47, 9.47)  | 2.33 | (0.85, 6.42)  | 7.39 | (2.84, 19.21) | 7.36 | (2.83, 19.13) | 8.98 | (2.86, 28.18) | 70 - <80           | 5.38 | (0.52, 55.05) | 2.00 | (0.58, 6.87)  | 1.63 | (0.43, 6.19) | 0.99 | (0.15, 2.32)  | 0.91 | (0.26, 3.16)  | 1.65 | (0.48, 5.62)  | 80 - <90            | -    | -            | -    | -             | -    | -             | -    | -             | -    | -             | -    | -             | 90 - <100              | -    | -             | -     | -              | -     | -              | -     | -             | -     | -              | -     | -             | 100 - <110             | -     | -             | -     | -             | -    | -             | -    | -             | -    | -             | -    | -             | <b>Length of Stay (months)</b> |     |   |      |               |      |              |      |              |      |              |      |               | <1           | -    | -             | 0.73  | (0.32, 1.66)   | 0.57  | (0.19, 1.74)   | 0.70  | (0.35, 1.37)  | 0.70  | (0.35, 1.37)   | 0.93  | (0.44, 1.98)  | 1-6 (comparator)      | -    | -             | -     | -              | -     | -              | -     | -             | -     | -              | -     | -             | 6-12                           | 2.86 | (0.25, 32.21) | 1.45 | (0.82, 2.56) | 1.66 | (0.85, 3.27) | 1.55 | (0.96, 2.5)  | 1.76 | (1.1, 2.83)  | 1.92 | (1.04, 2.74) | 12-24                  | 2.97 | (0.26, 31.45) | 1.86 | (1.04, 3.33) | 3.31 | (1.69, 6.09) | 2.11 | (1.29, 3.46) | 2.11 | (1.29, 3.45) | 2.13 | (1.46, 3.08) | 24+              | 6.26 | (0.72, 54.75) | 5.14  | (1.2, 8.93)   | 8.31  | (4.64, 14.88) | 4.94 | (3.11, 7.87)  | 5.70 | (3.58, 9.07)  | 6.95  | (4.13, 11.69) | <b>Ethnic Group</b>    |      |               |       |               |       |               |      |               |      |               |       |               | White (comparator)     | -    | -             | -    | -            | -    | -            | -    | -            | -    | -            | -    | -            | Mixed          | -    | -             | 0.45 | (0.06, 3.63) | -    | -             | 0.54 | (0.11, 2.65) | 0.50 | (0.1, 2.48)  | 0.73 | (0.14, 3.76)  | Asian or Asian British | 9.62 | (0.99, 91.54) | 8.07 | (3.05, 21.34) | 4.65 | (1.72, 12.88) | 4.66 | (1.74, 12.48) | 4.34 | (1.62, 11.6) | 4.28 | (1.12, 16.46) | Black or Black British         | 16.40 | (2.7, 99.6)  | 0.90 | (0.24, 3.33) | 2.46 | (0.82, 7.31) | 1.80 | (0.64, 3.87) | 1.23 | (0.41, 3.64) | 1.80 | (0.58, 5.64) | Chinese and Other   | -    | -             | 2.69 | (0.81, 8.95) | 1.60 | (0.62, 4.3)  | 2.81 | (0.84, 9.36) | 2.63 | (0.78, 8.73) | 1.72 | (0.49, 6.04) | Unclassified           | -    | -             | 2.45 | (0.65, 9.26)  | 1.76 | (0.38, 8.21)  | 1.51 | (0.39, 5.79)  | 1.41 | (0.37, 5.41) | 2.60 | (0.64, 10.54) |                        |       |               |      |              |      |              |      |              |      |              |      |              |                     |      |               |      |              |      |              |      |              |      |              |      |              |                     |      |               |      |              |      |               |      |              |      |              |      |               |                       |   |   |      |              |      |              |      |              |      |             |      |             |                    |      |              |      |              |      |              |      |             |      |              |      |             |          |      |              |      |              |      |              |      |              |      |              |      |              |                        |      |               |      |               |      |               |      |               |      |               |      |               |                        |       |               |      |              |      |              |      |              |      |              |      |              |                   |      |              |      |              |      |              |      |              |      |              |      |              |              |      |               |      |              |      |              |      |               |      |               |      |               |            |      |               |      |              |      |              |      |               |      |               |      |               |                                |      |               |      |              |      |              |      |              |      |              |      |              |           |   |   |      |              |      |              |      |              |      |              |      |              |                  |   |   |   |   |   |   |   |   |   |   |   |   |                                |      |               |      |              |      |              |      |             |      |             |      |              |                                |      |               |      |              |      |              |      |              |      |              |      |              |                  |      |               |      |              |      |               |      |              |      |              |      |               |                     |      |               |      |              |      |              |      |             |      |             |      |              |                    |      |               |      |              |      |              |      |              |      |              |      |              |       |      |               |      |              |      |               |      |              |      |              |      |               |                        |      |               |      |               |      |               |      |               |      |              |      |               |                        |       |             |      |              |      |              |      |              |      |              |      |              |                    |   |   |      |              |      |             |      |              |      |              |      |              |                        |      |               |      |               |      |               |      |               |      |              |      |               |                        |       |               |      |               |      |               |      |               |      |              |      |               |                        |       |             |      |              |      |              |      |              |      |              |      |              |                   |   |   |      |              |      |              |      |              |      |              |      |               |              |   |   |      |              |      |              |      |              |      |              |      |               |
| 10 - <20                                                                                                                                                                                                                                                                                                  | -                                | -             | -             | -                     | -     | -              | -                | -             | -              | -              | -     | -              |                      |      |              |      |               |      |              |      |              |      |               |      |               |                  |      |              |      |               |      |              |      |              |      |              |      |              |                        |      |               |      |               |      |               |      |               |      |               |      |               |                        |       |               |      |               |      |              |      |              |      |               |      |               |                   |      |               |      |               |      |               |      |               |      |               |      |               |                       |      |               |       |               |      |               |      |               |      |               |      |               |                    |      |               |      |               |      |              |      |               |      |               |      |               |                     |      |              |      |               |      |               |      |               |      |               |      |               |                        |      |               |       |                |       |                |       |               |       |                |       |               |                        |       |               |       |               |      |               |      |               |      |               |      |               |                                |     |   |      |               |      |              |      |              |      |              |      |               |              |      |               |       |                |       |                |       |               |       |                |       |               |                       |      |               |       |                |       |                |       |               |       |                |       |               |                                |      |               |      |              |      |              |      |              |      |              |      |              |                        |      |               |      |              |      |              |      |              |      |              |      |              |                  |      |               |       |               |       |               |      |               |      |               |       |               |                        |      |               |       |               |       |               |      |               |      |               |       |               |                        |      |               |      |              |      |              |      |              |      |              |      |              |                |      |               |      |              |      |               |      |              |      |              |      |               |                        |      |               |      |               |      |               |      |               |      |              |      |               |                                |       |              |      |              |      |              |      |              |      |              |      |              |                     |      |               |      |              |      |              |      |              |      |              |      |              |                        |      |               |      |               |      |               |      |               |      |              |      |               |                        |       |               |      |              |      |              |      |              |      |              |      |              |                     |      |               |      |              |      |              |      |              |      |              |      |              |                     |      |               |      |              |      |               |      |              |      |              |      |               |                       |   |   |      |              |      |              |      |              |      |             |      |             |                    |      |              |      |              |      |              |      |             |      |              |      |             |          |      |              |      |              |      |              |      |              |      |              |      |              |                        |      |               |      |               |      |               |      |               |      |               |      |               |                        |       |               |      |              |      |              |      |              |      |              |      |              |                   |      |              |      |              |      |              |      |              |      |              |      |              |              |      |               |      |              |      |              |      |               |      |               |      |               |            |      |               |      |              |      |              |      |               |      |               |      |               |                                |      |               |      |              |      |              |      |              |      |              |      |              |           |   |   |      |              |      |              |      |              |      |              |      |              |                  |   |   |   |   |   |   |   |   |   |   |   |   |                                |      |               |      |              |      |              |      |             |      |             |      |              |                                |      |               |      |              |      |              |      |              |      |              |      |              |                  |      |               |      |              |      |               |      |              |      |              |      |               |                     |      |               |      |              |      |              |      |             |      |             |      |              |                    |      |               |      |              |      |              |      |              |      |              |      |              |       |      |               |      |              |      |               |      |              |      |              |      |               |                        |      |               |      |               |      |               |      |               |      |              |      |               |                        |       |             |      |              |      |              |      |              |      |              |      |              |                    |   |   |      |              |      |             |      |              |      |              |      |              |                        |      |               |      |               |      |               |      |               |      |              |      |               |                        |       |               |      |               |      |               |      |               |      |              |      |               |                        |       |             |      |              |      |              |      |              |      |              |      |              |                   |   |   |      |              |      |              |      |              |      |              |      |               |              |   |   |      |              |      |              |      |              |      |              |      |               |
| 20 - <30                                                                                                                                                                                                                                                                                                  | -                                | -             | 0.68          | (0.37, 1.22)          | 0.60  | (0.31, 1.16)   | 0.61             | (0.37, 0.99)  | 0.58           | (0.35, 0.95)   | 0.57  | (0.33, 0.98)   |                      |      |              |      |               |      |              |      |              |      |               |      |               |                  |      |              |      |               |      |              |      |              |      |              |      |              |                        |      |               |      |               |      |               |      |               |      |               |      |               |                        |       |               |      |               |      |              |      |              |      |               |      |               |                   |      |               |      |               |      |               |      |               |      |               |      |               |                       |      |               |       |               |      |               |      |               |      |               |      |               |                    |      |               |      |               |      |              |      |               |      |               |      |               |                     |      |              |      |               |      |               |      |               |      |               |      |               |                        |      |               |       |                |       |                |       |               |       |                |       |               |                        |       |               |       |               |      |               |      |               |      |               |      |               |                                |     |   |      |               |      |              |      |              |      |              |      |               |              |      |               |       |                |       |                |       |               |       |                |       |               |                       |      |               |       |                |       |                |       |               |       |                |       |               |                                |      |               |      |              |      |              |      |              |      |              |      |              |                        |      |               |      |              |      |              |      |              |      |              |      |              |                  |      |               |       |               |       |               |      |               |      |               |       |               |                        |      |               |       |               |       |               |      |               |      |               |       |               |                        |      |               |      |              |      |              |      |              |      |              |      |              |                |      |               |      |              |      |               |      |              |      |              |      |               |                        |      |               |      |               |      |               |      |               |      |              |      |               |                                |       |              |      |              |      |              |      |              |      |              |      |              |                     |      |               |      |              |      |              |      |              |      |              |      |              |                        |      |               |      |               |      |               |      |               |      |              |      |               |                        |       |               |      |              |      |              |      |              |      |              |      |              |                     |      |               |      |              |      |              |      |              |      |              |      |              |                     |      |               |      |              |      |               |      |              |      |              |      |               |                       |   |   |      |              |      |              |      |              |      |             |      |             |                    |      |              |      |              |      |              |      |             |      |              |      |             |          |      |              |      |              |      |              |      |              |      |              |      |              |                        |      |               |      |               |      |               |      |               |      |               |      |               |                        |       |               |      |              |      |              |      |              |      |              |      |              |                   |      |              |      |              |      |              |      |              |      |              |      |              |              |      |               |      |              |      |              |      |               |      |               |      |               |            |      |               |      |              |      |              |      |               |      |               |      |               |                                |      |               |      |              |      |              |      |              |      |              |      |              |           |   |   |      |              |      |              |      |              |      |              |      |              |                  |   |   |   |   |   |   |   |   |   |   |   |   |                                |      |               |      |              |      |              |      |             |      |             |      |              |                                |      |               |      |              |      |              |      |              |      |              |      |              |                  |      |               |      |              |      |               |      |              |      |              |      |               |                     |      |               |      |              |      |              |      |             |      |             |      |              |                    |      |               |      |              |      |              |      |              |      |              |      |              |       |      |               |      |              |      |               |      |              |      |              |      |               |                        |      |               |      |               |      |               |      |               |      |              |      |               |                        |       |             |      |              |      |              |      |              |      |              |      |              |                    |   |   |      |              |      |             |      |              |      |              |      |              |                        |      |               |      |               |      |               |      |               |      |              |      |               |                        |       |               |      |               |      |               |      |               |      |              |      |               |                        |       |             |      |              |      |              |      |              |      |              |      |              |                   |   |   |      |              |      |              |      |              |      |              |      |               |              |   |   |      |              |      |              |      |              |      |              |      |               |
| 30 - <40 (comparator)                                                                                                                                                                                                                                                                                     | -                                | -             | -             | -                     | -     | -              | -                | -             | -              | -              | -     | -              |                      |      |              |      |               |      |              |      |              |      |               |      |               |                  |      |              |      |               |      |              |      |              |      |              |      |              |                        |      |               |      |               |      |               |      |               |      |               |      |               |                        |       |               |      |               |      |              |      |              |      |               |      |               |                   |      |               |      |               |      |               |      |               |      |               |      |               |                       |      |               |       |               |      |               |      |               |      |               |      |               |                    |      |               |      |               |      |              |      |               |      |               |      |               |                     |      |              |      |               |      |               |      |               |      |               |      |               |                        |      |               |       |                |       |                |       |               |       |                |       |               |                        |       |               |       |               |      |               |      |               |      |               |      |               |                                |     |   |      |               |      |              |      |              |      |              |      |               |              |      |               |       |                |       |                |       |               |       |                |       |               |                       |      |               |       |                |       |                |       |               |       |                |       |               |                                |      |               |      |              |      |              |      |              |      |              |      |              |                        |      |               |      |              |      |              |      |              |      |              |      |              |                  |      |               |       |               |       |               |      |               |      |               |       |               |                        |      |               |       |               |       |               |      |               |      |               |       |               |                        |      |               |      |              |      |              |      |              |      |              |      |              |                |      |               |      |              |      |               |      |              |      |              |      |               |                        |      |               |      |               |      |               |      |               |      |              |      |               |                                |       |              |      |              |      |              |      |              |      |              |      |              |                     |      |               |      |              |      |              |      |              |      |              |      |              |                        |      |               |      |               |      |               |      |               |      |              |      |               |                        |       |               |      |              |      |              |      |              |      |              |      |              |                     |      |               |      |              |      |              |      |              |      |              |      |              |                     |      |               |      |              |      |               |      |              |      |              |      |               |                       |   |   |      |              |      |              |      |              |      |             |      |             |                    |      |              |      |              |      |              |      |             |      |              |      |             |          |      |              |      |              |      |              |      |              |      |              |      |              |                        |      |               |      |               |      |               |      |               |      |               |      |               |                        |       |               |      |              |      |              |      |              |      |              |      |              |                   |      |              |      |              |      |              |      |              |      |              |      |              |              |      |               |      |              |      |              |      |               |      |               |      |               |            |      |               |      |              |      |              |      |               |      |               |      |               |                                |      |               |      |              |      |              |      |              |      |              |      |              |           |   |   |      |              |      |              |      |              |      |              |      |              |                  |   |   |   |   |   |   |   |   |   |   |   |   |                                |      |               |      |              |      |              |      |             |      |             |      |              |                                |      |               |      |              |      |              |      |              |      |              |      |              |                  |      |               |      |              |      |               |      |              |      |              |      |               |                     |      |               |      |              |      |              |      |             |      |             |      |              |                    |      |               |      |              |      |              |      |              |      |              |      |              |       |      |               |      |              |      |               |      |              |      |              |      |               |                        |      |               |      |               |      |               |      |               |      |              |      |               |                        |       |             |      |              |      |              |      |              |      |              |      |              |                    |   |   |      |              |      |             |      |              |      |              |      |              |                        |      |               |      |               |      |               |      |               |      |              |      |               |                        |       |               |      |               |      |               |      |               |      |              |      |               |                        |       |             |      |              |      |              |      |              |      |              |      |              |                   |   |   |      |              |      |              |      |              |      |              |      |               |              |   |   |      |              |      |              |      |              |      |              |      |               |
| 40 - <50                                                                                                                                                                                                                                                                                                  | 0.77                             | (0.14, 4.27)  | 1.12          | (0.84, 2.09)          | 1.24  | (0.76, 2.01)   | 0.90             | (0.6, 1.35)   | 1.02           | (0.68, 1.52)   | 0.76  | (0.48, 1.2)    |                      |      |              |      |               |      |              |      |              |      |               |      |               |                  |      |              |      |               |      |              |      |              |      |              |      |              |                        |      |               |      |               |      |               |      |               |      |               |      |               |                        |       |               |      |               |      |              |      |              |      |               |      |               |                   |      |               |      |               |      |               |      |               |      |               |      |               |                       |      |               |       |               |      |               |      |               |      |               |      |               |                    |      |               |      |               |      |              |      |               |      |               |      |               |                     |      |              |      |               |      |               |      |               |      |               |      |               |                        |      |               |       |                |       |                |       |               |       |                |       |               |                        |       |               |       |               |      |               |      |               |      |               |      |               |                                |     |   |      |               |      |              |      |              |      |              |      |               |              |      |               |       |                |       |                |       |               |       |                |       |               |                       |      |               |       |                |       |                |       |               |       |                |       |               |                                |      |               |      |              |      |              |      |              |      |              |      |              |                        |      |               |      |              |      |              |      |              |      |              |      |              |                  |      |               |       |               |       |               |      |               |      |               |       |               |                        |      |               |       |               |       |               |      |               |      |               |       |               |                        |      |               |      |              |      |              |      |              |      |              |      |              |                |      |               |      |              |      |               |      |              |      |              |      |               |                        |      |               |      |               |      |               |      |               |      |              |      |               |                                |       |              |      |              |      |              |      |              |      |              |      |              |                     |      |               |      |              |      |              |      |              |      |              |      |              |                        |      |               |      |               |      |               |      |               |      |              |      |               |                        |       |               |      |              |      |              |      |              |      |              |      |              |                     |      |               |      |              |      |              |      |              |      |              |      |              |                     |      |               |      |              |      |               |      |              |      |              |      |               |                       |   |   |      |              |      |              |      |              |      |             |      |             |                    |      |              |      |              |      |              |      |             |      |              |      |             |          |      |              |      |              |      |              |      |              |      |              |      |              |                        |      |               |      |               |      |               |      |               |      |               |      |               |                        |       |               |      |              |      |              |      |              |      |              |      |              |                   |      |              |      |              |      |              |      |              |      |              |      |              |              |      |               |      |              |      |              |      |               |      |               |      |               |            |      |               |      |              |      |              |      |               |      |               |      |               |                                |      |               |      |              |      |              |      |              |      |              |      |              |           |   |   |      |              |      |              |      |              |      |              |      |              |                  |   |   |   |   |   |   |   |   |   |   |   |   |                                |      |               |      |              |      |              |      |             |      |             |      |              |                                |      |               |      |              |      |              |      |              |      |              |      |              |                  |      |               |      |              |      |               |      |              |      |              |      |               |                     |      |               |      |              |      |              |      |             |      |             |      |              |                    |      |               |      |              |      |              |      |              |      |              |      |              |       |      |               |      |              |      |               |      |              |      |              |      |               |                        |      |               |      |               |      |               |      |               |      |              |      |               |                        |       |             |      |              |      |              |      |              |      |              |      |              |                    |   |   |      |              |      |             |      |              |      |              |      |              |                        |      |               |      |               |      |               |      |               |      |              |      |               |                        |       |               |      |               |      |               |      |               |      |              |      |               |                        |       |             |      |              |      |              |      |              |      |              |      |              |                   |   |   |      |              |      |              |      |              |      |              |      |               |              |   |   |      |              |      |              |      |              |      |              |      |               |
| 50 - <60                                                                                                                                                                                                                                                                                                  | 1.46                             | (0.26, 8.27)  | 2.27          | (1.31, 3.95)          | 2.90  | (1.62, 4.8)    | 1.61             | (0.98, 2.7)   | 1.98           | (1.19, 3.3)    | 1.53  | (0.98, 2.07)   |                      |      |              |      |               |      |              |      |              |      |               |      |               |                  |      |              |      |               |      |              |      |              |      |              |      |              |                        |      |               |      |               |      |               |      |               |      |               |      |               |                        |       |               |      |               |      |              |      |              |      |               |      |               |                   |      |               |      |               |      |               |      |               |      |               |      |               |                       |      |               |       |               |      |               |      |               |      |               |      |               |                    |      |               |      |               |      |              |      |               |      |               |      |               |                     |      |              |      |               |      |               |      |               |      |               |      |               |                        |      |               |       |                |       |                |       |               |       |                |       |               |                        |       |               |       |               |      |               |      |               |      |               |      |               |                                |     |   |      |               |      |              |      |              |      |              |      |               |              |      |               |       |                |       |                |       |               |       |                |       |               |                       |      |               |       |                |       |                |       |               |       |                |       |               |                                |      |               |      |              |      |              |      |              |      |              |      |              |                        |      |               |      |              |      |              |      |              |      |              |      |              |                  |      |               |       |               |       |               |      |               |      |               |       |               |                        |      |               |       |               |       |               |      |               |      |               |       |               |                        |      |               |      |              |      |              |      |              |      |              |      |              |                |      |               |      |              |      |               |      |              |      |              |      |               |                        |      |               |      |               |      |               |      |               |      |              |      |               |                                |       |              |      |              |      |              |      |              |      |              |      |              |                     |      |               |      |              |      |              |      |              |      |              |      |              |                        |      |               |      |               |      |               |      |               |      |              |      |               |                        |       |               |      |              |      |              |      |              |      |              |      |              |                     |      |               |      |              |      |              |      |              |      |              |      |              |                     |      |               |      |              |      |               |      |              |      |              |      |               |                       |   |   |      |              |      |              |      |              |      |             |      |             |                    |      |              |      |              |      |              |      |             |      |              |      |             |          |      |              |      |              |      |              |      |              |      |              |      |              |                        |      |               |      |               |      |               |      |               |      |               |      |               |                        |       |               |      |              |      |              |      |              |      |              |      |              |                   |      |              |      |              |      |              |      |              |      |              |      |              |              |      |               |      |              |      |              |      |               |      |               |      |               |            |      |               |      |              |      |              |      |               |      |               |      |               |                                |      |               |      |              |      |              |      |              |      |              |      |              |           |   |   |      |              |      |              |      |              |      |              |      |              |                  |   |   |   |   |   |   |   |   |   |   |   |   |                                |      |               |      |              |      |              |      |             |      |             |      |              |                                |      |               |      |              |      |              |      |              |      |              |      |              |                  |      |               |      |              |      |               |      |              |      |              |      |               |                     |      |               |      |              |      |              |      |             |      |             |      |              |                    |      |               |      |              |      |              |      |              |      |              |      |              |       |      |               |      |              |      |               |      |              |      |              |      |               |                        |      |               |      |               |      |               |      |               |      |              |      |               |                        |       |             |      |              |      |              |      |              |      |              |      |              |                    |   |   |      |              |      |             |      |              |      |              |      |              |                        |      |               |      |               |      |               |      |               |      |              |      |               |                        |       |               |      |               |      |               |      |               |      |              |      |               |                        |       |             |      |              |      |              |      |              |      |              |      |              |                   |   |   |      |              |      |              |      |              |      |              |      |               |              |   |   |      |              |      |              |      |              |      |              |      |               |
| 60 - <70                                                                                                                                                                                                                                                                                                  | 3.22                             | (0.33, 31.44) | 3.73          | (1.47, 9.47)          | 2.33  | (0.85, 6.42)   | 7.39             | (2.84, 19.21) | 7.36           | (2.83, 19.13)  | 8.98  | (2.86, 28.18)  |                      |      |              |      |               |      |              |      |              |      |               |      |               |                  |      |              |      |               |      |              |      |              |      |              |      |              |                        |      |               |      |               |      |               |      |               |      |               |      |               |                        |       |               |      |               |      |              |      |              |      |               |      |               |                   |      |               |      |               |      |               |      |               |      |               |      |               |                       |      |               |       |               |      |               |      |               |      |               |      |               |                    |      |               |      |               |      |              |      |               |      |               |      |               |                     |      |              |      |               |      |               |      |               |      |               |      |               |                        |      |               |       |                |       |                |       |               |       |                |       |               |                        |       |               |       |               |      |               |      |               |      |               |      |               |                                |     |   |      |               |      |              |      |              |      |              |      |               |              |      |               |       |                |       |                |       |               |       |                |       |               |                       |      |               |       |                |       |                |       |               |       |                |       |               |                                |      |               |      |              |      |              |      |              |      |              |      |              |                        |      |               |      |              |      |              |      |              |      |              |      |              |                  |      |               |       |               |       |               |      |               |      |               |       |               |                        |      |               |       |               |       |               |      |               |      |               |       |               |                        |      |               |      |              |      |              |      |              |      |              |      |              |                |      |               |      |              |      |               |      |              |      |              |      |               |                        |      |               |      |               |      |               |      |               |      |              |      |               |                                |       |              |      |              |      |              |      |              |      |              |      |              |                     |      |               |      |              |      |              |      |              |      |              |      |              |                        |      |               |      |               |      |               |      |               |      |              |      |               |                        |       |               |      |              |      |              |      |              |      |              |      |              |                     |      |               |      |              |      |              |      |              |      |              |      |              |                     |      |               |      |              |      |               |      |              |      |              |      |               |                       |   |   |      |              |      |              |      |              |      |             |      |             |                    |      |              |      |              |      |              |      |             |      |              |      |             |          |      |              |      |              |      |              |      |              |      |              |      |              |                        |      |               |      |               |      |               |      |               |      |               |      |               |                        |       |               |      |              |      |              |      |              |      |              |      |              |                   |      |              |      |              |      |              |      |              |      |              |      |              |              |      |               |      |              |      |              |      |               |      |               |      |               |            |      |               |      |              |      |              |      |               |      |               |      |               |                                |      |               |      |              |      |              |      |              |      |              |      |              |           |   |   |      |              |      |              |      |              |      |              |      |              |                  |   |   |   |   |   |   |   |   |   |   |   |   |                                |      |               |      |              |      |              |      |             |      |             |      |              |                                |      |               |      |              |      |              |      |              |      |              |      |              |                  |      |               |      |              |      |               |      |              |      |              |      |               |                     |      |               |      |              |      |              |      |             |      |             |      |              |                    |      |               |      |              |      |              |      |              |      |              |      |              |       |      |               |      |              |      |               |      |              |      |              |      |               |                        |      |               |      |               |      |               |      |               |      |              |      |               |                        |       |             |      |              |      |              |      |              |      |              |      |              |                    |   |   |      |              |      |             |      |              |      |              |      |              |                        |      |               |      |               |      |               |      |               |      |              |      |               |                        |       |               |      |               |      |               |      |               |      |              |      |               |                        |       |             |      |              |      |              |      |              |      |              |      |              |                   |   |   |      |              |      |              |      |              |      |              |      |               |              |   |   |      |              |      |              |      |              |      |              |      |               |
| 70 - <80                                                                                                                                                                                                                                                                                                  | 5.38                             | (0.52, 55.05) | 2.00          | (0.58, 6.87)          | 1.63  | (0.43, 6.19)   | 0.99             | (0.15, 2.32)  | 0.91           | (0.26, 3.16)   | 1.65  | (0.48, 5.62)   |                      |      |              |      |               |      |              |      |              |      |               |      |               |                  |      |              |      |               |      |              |      |              |      |              |      |              |                        |      |               |      |               |      |               |      |               |      |               |      |               |                        |       |               |      |               |      |              |      |              |      |               |      |               |                   |      |               |      |               |      |               |      |               |      |               |      |               |                       |      |               |       |               |      |               |      |               |      |               |      |               |                    |      |               |      |               |      |              |      |               |      |               |      |               |                     |      |              |      |               |      |               |      |               |      |               |      |               |                        |      |               |       |                |       |                |       |               |       |                |       |               |                        |       |               |       |               |      |               |      |               |      |               |      |               |                                |     |   |      |               |      |              |      |              |      |              |      |               |              |      |               |       |                |       |                |       |               |       |                |       |               |                       |      |               |       |                |       |                |       |               |       |                |       |               |                                |      |               |      |              |      |              |      |              |      |              |      |              |                        |      |               |      |              |      |              |      |              |      |              |      |              |                  |      |               |       |               |       |               |      |               |      |               |       |               |                        |      |               |       |               |       |               |      |               |      |               |       |               |                        |      |               |      |              |      |              |      |              |      |              |      |              |                |      |               |      |              |      |               |      |              |      |              |      |               |                        |      |               |      |               |      |               |      |               |      |              |      |               |                                |       |              |      |              |      |              |      |              |      |              |      |              |                     |      |               |      |              |      |              |      |              |      |              |      |              |                        |      |               |      |               |      |               |      |               |      |              |      |               |                        |       |               |      |              |      |              |      |              |      |              |      |              |                     |      |               |      |              |      |              |      |              |      |              |      |              |                     |      |               |      |              |      |               |      |              |      |              |      |               |                       |   |   |      |              |      |              |      |              |      |             |      |             |                    |      |              |      |              |      |              |      |             |      |              |      |             |          |      |              |      |              |      |              |      |              |      |              |      |              |                        |      |               |      |               |      |               |      |               |      |               |      |               |                        |       |               |      |              |      |              |      |              |      |              |      |              |                   |      |              |      |              |      |              |      |              |      |              |      |              |              |      |               |      |              |      |              |      |               |      |               |      |               |            |      |               |      |              |      |              |      |               |      |               |      |               |                                |      |               |      |              |      |              |      |              |      |              |      |              |           |   |   |      |              |      |              |      |              |      |              |      |              |                  |   |   |   |   |   |   |   |   |   |   |   |   |                                |      |               |      |              |      |              |      |             |      |             |      |              |                                |      |               |      |              |      |              |      |              |      |              |      |              |                  |      |               |      |              |      |               |      |              |      |              |      |               |                     |      |               |      |              |      |              |      |             |      |             |      |              |                    |      |               |      |              |      |              |      |              |      |              |      |              |       |      |               |      |              |      |               |      |              |      |              |      |               |                        |      |               |      |               |      |               |      |               |      |              |      |               |                        |       |             |      |              |      |              |      |              |      |              |      |              |                    |   |   |      |              |      |             |      |              |      |              |      |              |                        |      |               |      |               |      |               |      |               |      |              |      |               |                        |       |               |      |               |      |               |      |               |      |              |      |               |                        |       |             |      |              |      |              |      |              |      |              |      |              |                   |   |   |      |              |      |              |      |              |      |              |      |               |              |   |   |      |              |      |              |      |              |      |              |      |               |
| 80 - <90                                                                                                                                                                                                                                                                                                  | -                                | -             | -             | -                     | -     | -              | -                | -             | -              | -              | -     | -              |                      |      |              |      |               |      |              |      |              |      |               |      |               |                  |      |              |      |               |      |              |      |              |      |              |      |              |                        |      |               |      |               |      |               |      |               |      |               |      |               |                        |       |               |      |               |      |              |      |              |      |               |      |               |                   |      |               |      |               |      |               |      |               |      |               |      |               |                       |      |               |       |               |      |               |      |               |      |               |      |               |                    |      |               |      |               |      |              |      |               |      |               |      |               |                     |      |              |      |               |      |               |      |               |      |               |      |               |                        |      |               |       |                |       |                |       |               |       |                |       |               |                        |       |               |       |               |      |               |      |               |      |               |      |               |                                |     |   |      |               |      |              |      |              |      |              |      |               |              |      |               |       |                |       |                |       |               |       |                |       |               |                       |      |               |       |                |       |                |       |               |       |                |       |               |                                |      |               |      |              |      |              |      |              |      |              |      |              |                        |      |               |      |              |      |              |      |              |      |              |      |              |                  |      |               |       |               |       |               |      |               |      |               |       |               |                        |      |               |       |               |       |               |      |               |      |               |       |               |                        |      |               |      |              |      |              |      |              |      |              |      |              |                |      |               |      |              |      |               |      |              |      |              |      |               |                        |      |               |      |               |      |               |      |               |      |              |      |               |                                |       |              |      |              |      |              |      |              |      |              |      |              |                     |      |               |      |              |      |              |      |              |      |              |      |              |                        |      |               |      |               |      |               |      |               |      |              |      |               |                        |       |               |      |              |      |              |      |              |      |              |      |              |                     |      |               |      |              |      |              |      |              |      |              |      |              |                     |      |               |      |              |      |               |      |              |      |              |      |               |                       |   |   |      |              |      |              |      |              |      |             |      |             |                    |      |              |      |              |      |              |      |             |      |              |      |             |          |      |              |      |              |      |              |      |              |      |              |      |              |                        |      |               |      |               |      |               |      |               |      |               |      |               |                        |       |               |      |              |      |              |      |              |      |              |      |              |                   |      |              |      |              |      |              |      |              |      |              |      |              |              |      |               |      |              |      |              |      |               |      |               |      |               |            |      |               |      |              |      |              |      |               |      |               |      |               |                                |      |               |      |              |      |              |      |              |      |              |      |              |           |   |   |      |              |      |              |      |              |      |              |      |              |                  |   |   |   |   |   |   |   |   |   |   |   |   |                                |      |               |      |              |      |              |      |             |      |             |      |              |                                |      |               |      |              |      |              |      |              |      |              |      |              |                  |      |               |      |              |      |               |      |              |      |              |      |               |                     |      |               |      |              |      |              |      |             |      |             |      |              |                    |      |               |      |              |      |              |      |              |      |              |      |              |       |      |               |      |              |      |               |      |              |      |              |      |               |                        |      |               |      |               |      |               |      |               |      |              |      |               |                        |       |             |      |              |      |              |      |              |      |              |      |              |                    |   |   |      |              |      |             |      |              |      |              |      |              |                        |      |               |      |               |      |               |      |               |      |              |      |               |                        |       |               |      |               |      |               |      |               |      |              |      |               |                        |       |             |      |              |      |              |      |              |      |              |      |              |                   |   |   |      |              |      |              |      |              |      |              |      |               |              |   |   |      |              |      |              |      |              |      |              |      |               |
| 90 - <100                                                                                                                                                                                                                                                                                                 | -                                | -             | -             | -                     | -     | -              | -                | -             | -              | -              | -     | -              |                      |      |              |      |               |      |              |      |              |      |               |      |               |                  |      |              |      |               |      |              |      |              |      |              |      |              |                        |      |               |      |               |      |               |      |               |      |               |      |               |                        |       |               |      |               |      |              |      |              |      |               |      |               |                   |      |               |      |               |      |               |      |               |      |               |      |               |                       |      |               |       |               |      |               |      |               |      |               |      |               |                    |      |               |      |               |      |              |      |               |      |               |      |               |                     |      |              |      |               |      |               |      |               |      |               |      |               |                        |      |               |       |                |       |                |       |               |       |                |       |               |                        |       |               |       |               |      |               |      |               |      |               |      |               |                                |     |   |      |               |      |              |      |              |      |              |      |               |              |      |               |       |                |       |                |       |               |       |                |       |               |                       |      |               |       |                |       |                |       |               |       |                |       |               |                                |      |               |      |              |      |              |      |              |      |              |      |              |                        |      |               |      |              |      |              |      |              |      |              |      |              |                  |      |               |       |               |       |               |      |               |      |               |       |               |                        |      |               |       |               |       |               |      |               |      |               |       |               |                        |      |               |      |              |      |              |      |              |      |              |      |              |                |      |               |      |              |      |               |      |              |      |              |      |               |                        |      |               |      |               |      |               |      |               |      |              |      |               |                                |       |              |      |              |      |              |      |              |      |              |      |              |                     |      |               |      |              |      |              |      |              |      |              |      |              |                        |      |               |      |               |      |               |      |               |      |              |      |               |                        |       |               |      |              |      |              |      |              |      |              |      |              |                     |      |               |      |              |      |              |      |              |      |              |      |              |                     |      |               |      |              |      |               |      |              |      |              |      |               |                       |   |   |      |              |      |              |      |              |      |             |      |             |                    |      |              |      |              |      |              |      |             |      |              |      |             |          |      |              |      |              |      |              |      |              |      |              |      |              |                        |      |               |      |               |      |               |      |               |      |               |      |               |                        |       |               |      |              |      |              |      |              |      |              |      |              |                   |      |              |      |              |      |              |      |              |      |              |      |              |              |      |               |      |              |      |              |      |               |      |               |      |               |            |      |               |      |              |      |              |      |               |      |               |      |               |                                |      |               |      |              |      |              |      |              |      |              |      |              |           |   |   |      |              |      |              |      |              |      |              |      |              |                  |   |   |   |   |   |   |   |   |   |   |   |   |                                |      |               |      |              |      |              |      |             |      |             |      |              |                                |      |               |      |              |      |              |      |              |      |              |      |              |                  |      |               |      |              |      |               |      |              |      |              |      |               |                     |      |               |      |              |      |              |      |             |      |             |      |              |                    |      |               |      |              |      |              |      |              |      |              |      |              |       |      |               |      |              |      |               |      |              |      |              |      |               |                        |      |               |      |               |      |               |      |               |      |              |      |               |                        |       |             |      |              |      |              |      |              |      |              |      |              |                    |   |   |      |              |      |             |      |              |      |              |      |              |                        |      |               |      |               |      |               |      |               |      |              |      |               |                        |       |               |      |               |      |               |      |               |      |              |      |               |                        |       |             |      |              |      |              |      |              |      |              |      |              |                   |   |   |      |              |      |              |      |              |      |              |      |               |              |   |   |      |              |      |              |      |              |      |              |      |               |
| 100 - <110                                                                                                                                                                                                                                                                                                | -                                | -             | -             | -                     | -     | -              | -                | -             | -              | -              | -     | -              |                      |      |              |      |               |      |              |      |              |      |               |      |               |                  |      |              |      |               |      |              |      |              |      |              |      |              |                        |      |               |      |               |      |               |      |               |      |               |      |               |                        |       |               |      |               |      |              |      |              |      |               |      |               |                   |      |               |      |               |      |               |      |               |      |               |      |               |                       |      |               |       |               |      |               |      |               |      |               |      |               |                    |      |               |      |               |      |              |      |               |      |               |      |               |                     |      |              |      |               |      |               |      |               |      |               |      |               |                        |      |               |       |                |       |                |       |               |       |                |       |               |                        |       |               |       |               |      |               |      |               |      |               |      |               |                                |     |   |      |               |      |              |      |              |      |              |      |               |              |      |               |       |                |       |                |       |               |       |                |       |               |                       |      |               |       |                |       |                |       |               |       |                |       |               |                                |      |               |      |              |      |              |      |              |      |              |      |              |                        |      |               |      |              |      |              |      |              |      |              |      |              |                  |      |               |       |               |       |               |      |               |      |               |       |               |                        |      |               |       |               |       |               |      |               |      |               |       |               |                        |      |               |      |              |      |              |      |              |      |              |      |              |                |      |               |      |              |      |               |      |              |      |              |      |               |                        |      |               |      |               |      |               |      |               |      |              |      |               |                                |       |              |      |              |      |              |      |              |      |              |      |              |                     |      |               |      |              |      |              |      |              |      |              |      |              |                        |      |               |      |               |      |               |      |               |      |              |      |               |                        |       |               |      |              |      |              |      |              |      |              |      |              |                     |      |               |      |              |      |              |      |              |      |              |      |              |                     |      |               |      |              |      |               |      |              |      |              |      |               |                       |   |   |      |              |      |              |      |              |      |             |      |             |                    |      |              |      |              |      |              |      |             |      |              |      |             |          |      |              |      |              |      |              |      |              |      |              |      |              |                        |      |               |      |               |      |               |      |               |      |               |      |               |                        |       |               |      |              |      |              |      |              |      |              |      |              |                   |      |              |      |              |      |              |      |              |      |              |      |              |              |      |               |      |              |      |              |      |               |      |               |      |               |            |      |               |      |              |      |              |      |               |      |               |      |               |                                |      |               |      |              |      |              |      |              |      |              |      |              |           |   |   |      |              |      |              |      |              |      |              |      |              |                  |   |   |   |   |   |   |   |   |   |   |   |   |                                |      |               |      |              |      |              |      |             |      |             |      |              |                                |      |               |      |              |      |              |      |              |      |              |      |              |                  |      |               |      |              |      |               |      |              |      |              |      |               |                     |      |               |      |              |      |              |      |             |      |             |      |              |                    |      |               |      |              |      |              |      |              |      |              |      |              |       |      |               |      |              |      |               |      |              |      |              |      |               |                        |      |               |      |               |      |               |      |               |      |              |      |               |                        |       |             |      |              |      |              |      |              |      |              |      |              |                    |   |   |      |              |      |             |      |              |      |              |      |              |                        |      |               |      |               |      |               |      |               |      |              |      |               |                        |       |               |      |               |      |               |      |               |      |              |      |               |                        |       |             |      |              |      |              |      |              |      |              |      |              |                   |   |   |      |              |      |              |      |              |      |              |      |               |              |   |   |      |              |      |              |      |              |      |              |      |               |
| <b>Length of Stay (months)</b>                                                                                                                                                                                                                                                                            |                                  |               |               |                       |       |                |                  |               |                |                |       |                | <1                   | -    | -            | 0.73 | (0.32, 1.66)  | 0.57 | (0.19, 1.74) | 0.70 | (0.35, 1.37) | 0.70 | (0.35, 1.37)  | 0.93 | (0.44, 1.98)  | 1-6 (comparator) | -    | -            | -    | -             | -    | -            | -    | -            | -    | -            | -    | -            | 6-12                   | 2.86 | (0.25, 32.21) | 1.45 | (0.82, 2.56)  | 1.66 | (0.85, 3.27)  | 1.55 | (0.96, 2.5)   | 1.76 | (1.1, 2.83)   | 1.92 | (1.04, 2.74)  | 12-24                  | 2.97  | (0.26, 31.45) | 1.86 | (1.04, 3.33)  | 3.31 | (1.69, 6.09) | 2.11 | (1.29, 3.46) | 2.11 | (1.29, 3.45)  | 2.13 | (1.46, 3.08)  | 24+               | 6.26 | (0.72, 54.75) | 5.14 | (1.2, 8.93)   | 8.31 | (4.64, 14.88) | 4.94 | (3.11, 7.87)  | 5.70 | (3.58, 9.07)  | 6.95 | (4.13, 11.69) | <b>Ethnic Group</b>   |      |               |       |               |      |               |      |               |      |               |      |               | White (comparator) | -    | -             | -    | -             | -    | -            | -    | -             | -    | -             | -    | -             | Mixed               | -    | -            | 0.45 | (0.06, 3.63)  | -    | -             | 0.54 | (0.11, 2.65)  | 0.50 | (0.1, 2.48)   | 0.73 | (0.14, 3.76)  | Asian or Asian British | 9.62 | (0.99, 91.54) | 8.07  | (3.05, 21.34)  | 4.65  | (1.72, 12.88)  | 4.66  | (1.74, 12.48) | 4.34  | (1.62, 11.6)   | 4.28  | (1.12, 16.46) | Black or Black British | 16.40 | (2.7, 99.6)   | 0.90  | (0.24, 3.33)  | 2.46 | (0.82, 7.31)  | 1.80 | (0.64, 3.87)  | 1.23 | (0.41, 3.64)  | 1.80 | (0.58, 5.64)  | Chinese and Other              | -   | - | 2.69 | (0.81, 8.95)  | 1.60 | (0.62, 4.3)  | 2.81 | (0.84, 9.36) | 2.63 | (0.78, 8.73) | 1.72 | (0.49, 6.04)  | Unclassified | -    | -             | 2.45  | (0.65, 9.26)   | 1.76  | (0.38, 8.21)   | 1.51  | (0.39, 5.79)  | 1.41  | (0.37, 5.41)   | 2.60  | (0.64, 10.54) |                       |      |               |       |                |       |                |       |               |       |                |       |               |                                |      |               |      |              |      |              |      |              |      |              |      |              |                        |      |               |      |              |      |              |      |              |      |              |      |              |                  |      |               |       |               |       |               |      |               |      |               |       |               |                        |      |               |       |               |       |               |      |               |      |               |       |               |                        |      |               |      |              |      |              |      |              |      |              |      |              |                |      |               |      |              |      |               |      |              |      |              |      |               |                        |      |               |      |               |      |               |      |               |      |              |      |               |                                |       |              |      |              |      |              |      |              |      |              |      |              |                     |      |               |      |              |      |              |      |              |      |              |      |              |                        |      |               |      |               |      |               |      |               |      |              |      |               |                        |       |               |      |              |      |              |      |              |      |              |      |              |                     |      |               |      |              |      |              |      |              |      |              |      |              |                     |      |               |      |              |      |               |      |              |      |              |      |               |                       |   |   |      |              |      |              |      |              |      |             |      |             |                    |      |              |      |              |      |              |      |             |      |              |      |             |          |      |              |      |              |      |              |      |              |      |              |      |              |                        |      |               |      |               |      |               |      |               |      |               |      |               |                        |       |               |      |              |      |              |      |              |      |              |      |              |                   |      |              |      |              |      |              |      |              |      |              |      |              |              |      |               |      |              |      |              |      |               |      |               |      |               |            |      |               |      |              |      |              |      |               |      |               |      |               |                                |      |               |      |              |      |              |      |              |      |              |      |              |           |   |   |      |              |      |              |      |              |      |              |      |              |                  |   |   |   |   |   |   |   |   |   |   |   |   |                                |      |               |      |              |      |              |      |             |      |             |      |              |                                |      |               |      |              |      |              |      |              |      |              |      |              |                  |      |               |      |              |      |               |      |              |      |              |      |               |                     |      |               |      |              |      |              |      |             |      |             |      |              |                    |      |               |      |              |      |              |      |              |      |              |      |              |       |      |               |      |              |      |               |      |              |      |              |      |               |                        |      |               |      |               |      |               |      |               |      |              |      |               |                        |       |             |      |              |      |              |      |              |      |              |      |              |                    |   |   |      |              |      |             |      |              |      |              |      |              |                        |      |               |      |               |      |               |      |               |      |              |      |               |                        |       |               |      |               |      |               |      |               |      |              |      |               |                        |       |             |      |              |      |              |      |              |      |              |      |              |                   |   |   |      |              |      |              |      |              |      |              |      |               |              |   |   |      |              |      |              |      |              |      |              |      |               |
| <1                                                                                                                                                                                                                                                                                                        | -                                | -             | 0.73          | (0.32, 1.66)          | 0.57  | (0.19, 1.74)   | 0.70             | (0.35, 1.37)  | 0.70           | (0.35, 1.37)   | 0.93  | (0.44, 1.98)   |                      |      |              |      |               |      |              |      |              |      |               |      |               |                  |      |              |      |               |      |              |      |              |      |              |      |              |                        |      |               |      |               |      |               |      |               |      |               |      |               |                        |       |               |      |               |      |              |      |              |      |               |      |               |                   |      |               |      |               |      |               |      |               |      |               |      |               |                       |      |               |       |               |      |               |      |               |      |               |      |               |                    |      |               |      |               |      |              |      |               |      |               |      |               |                     |      |              |      |               |      |               |      |               |      |               |      |               |                        |      |               |       |                |       |                |       |               |       |                |       |               |                        |       |               |       |               |      |               |      |               |      |               |      |               |                                |     |   |      |               |      |              |      |              |      |              |      |               |              |      |               |       |                |       |                |       |               |       |                |       |               |                       |      |               |       |                |       |                |       |               |       |                |       |               |                                |      |               |      |              |      |              |      |              |      |              |      |              |                        |      |               |      |              |      |              |      |              |      |              |      |              |                  |      |               |       |               |       |               |      |               |      |               |       |               |                        |      |               |       |               |       |               |      |               |      |               |       |               |                        |      |               |      |              |      |              |      |              |      |              |      |              |                |      |               |      |              |      |               |      |              |      |              |      |               |                        |      |               |      |               |      |               |      |               |      |              |      |               |                                |       |              |      |              |      |              |      |              |      |              |      |              |                     |      |               |      |              |      |              |      |              |      |              |      |              |                        |      |               |      |               |      |               |      |               |      |              |      |               |                        |       |               |      |              |      |              |      |              |      |              |      |              |                     |      |               |      |              |      |              |      |              |      |              |      |              |                     |      |               |      |              |      |               |      |              |      |              |      |               |                       |   |   |      |              |      |              |      |              |      |             |      |             |                    |      |              |      |              |      |              |      |             |      |              |      |             |          |      |              |      |              |      |              |      |              |      |              |      |              |                        |      |               |      |               |      |               |      |               |      |               |      |               |                        |       |               |      |              |      |              |      |              |      |              |      |              |                   |      |              |      |              |      |              |      |              |      |              |      |              |              |      |               |      |              |      |              |      |               |      |               |      |               |            |      |               |      |              |      |              |      |               |      |               |      |               |                                |      |               |      |              |      |              |      |              |      |              |      |              |           |   |   |      |              |      |              |      |              |      |              |      |              |                  |   |   |   |   |   |   |   |   |   |   |   |   |                                |      |               |      |              |      |              |      |             |      |             |      |              |                                |      |               |      |              |      |              |      |              |      |              |      |              |                  |      |               |      |              |      |               |      |              |      |              |      |               |                     |      |               |      |              |      |              |      |             |      |             |      |              |                    |      |               |      |              |      |              |      |              |      |              |      |              |       |      |               |      |              |      |               |      |              |      |              |      |               |                        |      |               |      |               |      |               |      |               |      |              |      |               |                        |       |             |      |              |      |              |      |              |      |              |      |              |                    |   |   |      |              |      |             |      |              |      |              |      |              |                        |      |               |      |               |      |               |      |               |      |              |      |               |                        |       |               |      |               |      |               |      |               |      |              |      |               |                        |       |             |      |              |      |              |      |              |      |              |      |              |                   |   |   |      |              |      |              |      |              |      |              |      |               |              |   |   |      |              |      |              |      |              |      |              |      |               |
| 1-6 (comparator)                                                                                                                                                                                                                                                                                          | -                                | -             | -             | -                     | -     | -              | -                | -             | -              | -              | -     | -              |                      |      |              |      |               |      |              |      |              |      |               |      |               |                  |      |              |      |               |      |              |      |              |      |              |      |              |                        |      |               |      |               |      |               |      |               |      |               |      |               |                        |       |               |      |               |      |              |      |              |      |               |      |               |                   |      |               |      |               |      |               |      |               |      |               |      |               |                       |      |               |       |               |      |               |      |               |      |               |      |               |                    |      |               |      |               |      |              |      |               |      |               |      |               |                     |      |              |      |               |      |               |      |               |      |               |      |               |                        |      |               |       |                |       |                |       |               |       |                |       |               |                        |       |               |       |               |      |               |      |               |      |               |      |               |                                |     |   |      |               |      |              |      |              |      |              |      |               |              |      |               |       |                |       |                |       |               |       |                |       |               |                       |      |               |       |                |       |                |       |               |       |                |       |               |                                |      |               |      |              |      |              |      |              |      |              |      |              |                        |      |               |      |              |      |              |      |              |      |              |      |              |                  |      |               |       |               |       |               |      |               |      |               |       |               |                        |      |               |       |               |       |               |      |               |      |               |       |               |                        |      |               |      |              |      |              |      |              |      |              |      |              |                |      |               |      |              |      |               |      |              |      |              |      |               |                        |      |               |      |               |      |               |      |               |      |              |      |               |                                |       |              |      |              |      |              |      |              |      |              |      |              |                     |      |               |      |              |      |              |      |              |      |              |      |              |                        |      |               |      |               |      |               |      |               |      |              |      |               |                        |       |               |      |              |      |              |      |              |      |              |      |              |                     |      |               |      |              |      |              |      |              |      |              |      |              |                     |      |               |      |              |      |               |      |              |      |              |      |               |                       |   |   |      |              |      |              |      |              |      |             |      |             |                    |      |              |      |              |      |              |      |             |      |              |      |             |          |      |              |      |              |      |              |      |              |      |              |      |              |                        |      |               |      |               |      |               |      |               |      |               |      |               |                        |       |               |      |              |      |              |      |              |      |              |      |              |                   |      |              |      |              |      |              |      |              |      |              |      |              |              |      |               |      |              |      |              |      |               |      |               |      |               |            |      |               |      |              |      |              |      |               |      |               |      |               |                                |      |               |      |              |      |              |      |              |      |              |      |              |           |   |   |      |              |      |              |      |              |      |              |      |              |                  |   |   |   |   |   |   |   |   |   |   |   |   |                                |      |               |      |              |      |              |      |             |      |             |      |              |                                |      |               |      |              |      |              |      |              |      |              |      |              |                  |      |               |      |              |      |               |      |              |      |              |      |               |                     |      |               |      |              |      |              |      |             |      |             |      |              |                    |      |               |      |              |      |              |      |              |      |              |      |              |       |      |               |      |              |      |               |      |              |      |              |      |               |                        |      |               |      |               |      |               |      |               |      |              |      |               |                        |       |             |      |              |      |              |      |              |      |              |      |              |                    |   |   |      |              |      |             |      |              |      |              |      |              |                        |      |               |      |               |      |               |      |               |      |              |      |               |                        |       |               |      |               |      |               |      |               |      |              |      |               |                        |       |             |      |              |      |              |      |              |      |              |      |              |                   |   |   |      |              |      |              |      |              |      |              |      |               |              |   |   |      |              |      |              |      |              |      |              |      |               |
| 6-12                                                                                                                                                                                                                                                                                                      | 2.86                             | (0.25, 32.21) | 1.45          | (0.82, 2.56)          | 1.66  | (0.85, 3.27)   | 1.55             | (0.96, 2.5)   | 1.76           | (1.1, 2.83)    | 1.92  | (1.04, 2.74)   |                      |      |              |      |               |      |              |      |              |      |               |      |               |                  |      |              |      |               |      |              |      |              |      |              |      |              |                        |      |               |      |               |      |               |      |               |      |               |      |               |                        |       |               |      |               |      |              |      |              |      |               |      |               |                   |      |               |      |               |      |               |      |               |      |               |      |               |                       |      |               |       |               |      |               |      |               |      |               |      |               |                    |      |               |      |               |      |              |      |               |      |               |      |               |                     |      |              |      |               |      |               |      |               |      |               |      |               |                        |      |               |       |                |       |                |       |               |       |                |       |               |                        |       |               |       |               |      |               |      |               |      |               |      |               |                                |     |   |      |               |      |              |      |              |      |              |      |               |              |      |               |       |                |       |                |       |               |       |                |       |               |                       |      |               |       |                |       |                |       |               |       |                |       |               |                                |      |               |      |              |      |              |      |              |      |              |      |              |                        |      |               |      |              |      |              |      |              |      |              |      |              |                  |      |               |       |               |       |               |      |               |      |               |       |               |                        |      |               |       |               |       |               |      |               |      |               |       |               |                        |      |               |      |              |      |              |      |              |      |              |      |              |                |      |               |      |              |      |               |      |              |      |              |      |               |                        |      |               |      |               |      |               |      |               |      |              |      |               |                                |       |              |      |              |      |              |      |              |      |              |      |              |                     |      |               |      |              |      |              |      |              |      |              |      |              |                        |      |               |      |               |      |               |      |               |      |              |      |               |                        |       |               |      |              |      |              |      |              |      |              |      |              |                     |      |               |      |              |      |              |      |              |      |              |      |              |                     |      |               |      |              |      |               |      |              |      |              |      |               |                       |   |   |      |              |      |              |      |              |      |             |      |             |                    |      |              |      |              |      |              |      |             |      |              |      |             |          |      |              |      |              |      |              |      |              |      |              |      |              |                        |      |               |      |               |      |               |      |               |      |               |      |               |                        |       |               |      |              |      |              |      |              |      |              |      |              |                   |      |              |      |              |      |              |      |              |      |              |      |              |              |      |               |      |              |      |              |      |               |      |               |      |               |            |      |               |      |              |      |              |      |               |      |               |      |               |                                |      |               |      |              |      |              |      |              |      |              |      |              |           |   |   |      |              |      |              |      |              |      |              |      |              |                  |   |   |   |   |   |   |   |   |   |   |   |   |                                |      |               |      |              |      |              |      |             |      |             |      |              |                                |      |               |      |              |      |              |      |              |      |              |      |              |                  |      |               |      |              |      |               |      |              |      |              |      |               |                     |      |               |      |              |      |              |      |             |      |             |      |              |                    |      |               |      |              |      |              |      |              |      |              |      |              |       |      |               |      |              |      |               |      |              |      |              |      |               |                        |      |               |      |               |      |               |      |               |      |              |      |               |                        |       |             |      |              |      |              |      |              |      |              |      |              |                    |   |   |      |              |      |             |      |              |      |              |      |              |                        |      |               |      |               |      |               |      |               |      |              |      |               |                        |       |               |      |               |      |               |      |               |      |              |      |               |                        |       |             |      |              |      |              |      |              |      |              |      |              |                   |   |   |      |              |      |              |      |              |      |              |      |               |              |   |   |      |              |      |              |      |              |      |              |      |               |
| 12-24                                                                                                                                                                                                                                                                                                     | 2.97                             | (0.26, 31.45) | 1.86          | (1.04, 3.33)          | 3.31  | (1.69, 6.09)   | 2.11             | (1.29, 3.46)  | 2.11           | (1.29, 3.45)   | 2.13  | (1.46, 3.08)   |                      |      |              |      |               |      |              |      |              |      |               |      |               |                  |      |              |      |               |      |              |      |              |      |              |      |              |                        |      |               |      |               |      |               |      |               |      |               |      |               |                        |       |               |      |               |      |              |      |              |      |               |      |               |                   |      |               |      |               |      |               |      |               |      |               |      |               |                       |      |               |       |               |      |               |      |               |      |               |      |               |                    |      |               |      |               |      |              |      |               |      |               |      |               |                     |      |              |      |               |      |               |      |               |      |               |      |               |                        |      |               |       |                |       |                |       |               |       |                |       |               |                        |       |               |       |               |      |               |      |               |      |               |      |               |                                |     |   |      |               |      |              |      |              |      |              |      |               |              |      |               |       |                |       |                |       |               |       |                |       |               |                       |      |               |       |                |       |                |       |               |       |                |       |               |                                |      |               |      |              |      |              |      |              |      |              |      |              |                        |      |               |      |              |      |              |      |              |      |              |      |              |                  |      |               |       |               |       |               |      |               |      |               |       |               |                        |      |               |       |               |       |               |      |               |      |               |       |               |                        |      |               |      |              |      |              |      |              |      |              |      |              |                |      |               |      |              |      |               |      |              |      |              |      |               |                        |      |               |      |               |      |               |      |               |      |              |      |               |                                |       |              |      |              |      |              |      |              |      |              |      |              |                     |      |               |      |              |      |              |      |              |      |              |      |              |                        |      |               |      |               |      |               |      |               |      |              |      |               |                        |       |               |      |              |      |              |      |              |      |              |      |              |                     |      |               |      |              |      |              |      |              |      |              |      |              |                     |      |               |      |              |      |               |      |              |      |              |      |               |                       |   |   |      |              |      |              |      |              |      |             |      |             |                    |      |              |      |              |      |              |      |             |      |              |      |             |          |      |              |      |              |      |              |      |              |      |              |      |              |                        |      |               |      |               |      |               |      |               |      |               |      |               |                        |       |               |      |              |      |              |      |              |      |              |      |              |                   |      |              |      |              |      |              |      |              |      |              |      |              |              |      |               |      |              |      |              |      |               |      |               |      |               |            |      |               |      |              |      |              |      |               |      |               |      |               |                                |      |               |      |              |      |              |      |              |      |              |      |              |           |   |   |      |              |      |              |      |              |      |              |      |              |                  |   |   |   |   |   |   |   |   |   |   |   |   |                                |      |               |      |              |      |              |      |             |      |             |      |              |                                |      |               |      |              |      |              |      |              |      |              |      |              |                  |      |               |      |              |      |               |      |              |      |              |      |               |                     |      |               |      |              |      |              |      |             |      |             |      |              |                    |      |               |      |              |      |              |      |              |      |              |      |              |       |      |               |      |              |      |               |      |              |      |              |      |               |                        |      |               |      |               |      |               |      |               |      |              |      |               |                        |       |             |      |              |      |              |      |              |      |              |      |              |                    |   |   |      |              |      |             |      |              |      |              |      |              |                        |      |               |      |               |      |               |      |               |      |              |      |               |                        |       |               |      |               |      |               |      |               |      |              |      |               |                        |       |             |      |              |      |              |      |              |      |              |      |              |                   |   |   |      |              |      |              |      |              |      |              |      |               |              |   |   |      |              |      |              |      |              |      |              |      |               |
| 24+                                                                                                                                                                                                                                                                                                       | 6.26                             | (0.72, 54.75) | 5.14          | (1.2, 8.93)           | 8.31  | (4.64, 14.88)  | 4.94             | (3.11, 7.87)  | 5.70           | (3.58, 9.07)   | 6.95  | (4.13, 11.69)  |                      |      |              |      |               |      |              |      |              |      |               |      |               |                  |      |              |      |               |      |              |      |              |      |              |      |              |                        |      |               |      |               |      |               |      |               |      |               |      |               |                        |       |               |      |               |      |              |      |              |      |               |      |               |                   |      |               |      |               |      |               |      |               |      |               |      |               |                       |      |               |       |               |      |               |      |               |      |               |      |               |                    |      |               |      |               |      |              |      |               |      |               |      |               |                     |      |              |      |               |      |               |      |               |      |               |      |               |                        |      |               |       |                |       |                |       |               |       |                |       |               |                        |       |               |       |               |      |               |      |               |      |               |      |               |                                |     |   |      |               |      |              |      |              |      |              |      |               |              |      |               |       |                |       |                |       |               |       |                |       |               |                       |      |               |       |                |       |                |       |               |       |                |       |               |                                |      |               |      |              |      |              |      |              |      |              |      |              |                        |      |               |      |              |      |              |      |              |      |              |      |              |                  |      |               |       |               |       |               |      |               |      |               |       |               |                        |      |               |       |               |       |               |      |               |      |               |       |               |                        |      |               |      |              |      |              |      |              |      |              |      |              |                |      |               |      |              |      |               |      |              |      |              |      |               |                        |      |               |      |               |      |               |      |               |      |              |      |               |                                |       |              |      |              |      |              |      |              |      |              |      |              |                     |      |               |      |              |      |              |      |              |      |              |      |              |                        |      |               |      |               |      |               |      |               |      |              |      |               |                        |       |               |      |              |      |              |      |              |      |              |      |              |                     |      |               |      |              |      |              |      |              |      |              |      |              |                     |      |               |      |              |      |               |      |              |      |              |      |               |                       |   |   |      |              |      |              |      |              |      |             |      |             |                    |      |              |      |              |      |              |      |             |      |              |      |             |          |      |              |      |              |      |              |      |              |      |              |      |              |                        |      |               |      |               |      |               |      |               |      |               |      |               |                        |       |               |      |              |      |              |      |              |      |              |      |              |                   |      |              |      |              |      |              |      |              |      |              |      |              |              |      |               |      |              |      |              |      |               |      |               |      |               |            |      |               |      |              |      |              |      |               |      |               |      |               |                                |      |               |      |              |      |              |      |              |      |              |      |              |           |   |   |      |              |      |              |      |              |      |              |      |              |                  |   |   |   |   |   |   |   |   |   |   |   |   |                                |      |               |      |              |      |              |      |             |      |             |      |              |                                |      |               |      |              |      |              |      |              |      |              |      |              |                  |      |               |      |              |      |               |      |              |      |              |      |               |                     |      |               |      |              |      |              |      |             |      |             |      |              |                    |      |               |      |              |      |              |      |              |      |              |      |              |       |      |               |      |              |      |               |      |              |      |              |      |               |                        |      |               |      |               |      |               |      |               |      |              |      |               |                        |       |             |      |              |      |              |      |              |      |              |      |              |                    |   |   |      |              |      |             |      |              |      |              |      |              |                        |      |               |      |               |      |               |      |               |      |              |      |               |                        |       |               |      |               |      |               |      |               |      |              |      |               |                        |       |             |      |              |      |              |      |              |      |              |      |              |                   |   |   |      |              |      |              |      |              |      |              |      |               |              |   |   |      |              |      |              |      |              |      |              |      |               |
| <b>Ethnic Group</b>                                                                                                                                                                                                                                                                                       |                                  |               |               |                       |       |                |                  |               |                |                |       |                | White (comparator)   | -    | -            | -    | -             | -    | -            | -    | -            | -    | -             | -    | -             | Mixed            | -    | -            | 0.45 | (0.06, 3.63)  | -    | -            | 0.54 | (0.11, 2.65) | 0.50 | (0.1, 2.48)  | 0.73 | (0.14, 3.76) | Asian or Asian British | 9.62 | (0.99, 91.54) | 8.07 | (3.05, 21.34) | 4.65 | (1.72, 12.88) | 4.66 | (1.74, 12.48) | 4.34 | (1.62, 11.6)  | 4.28 | (1.12, 16.46) | Black or Black British | 16.40 | (2.7, 99.6)   | 0.90 | (0.24, 3.33)  | 2.46 | (0.82, 7.31) | 1.80 | (0.64, 3.87) | 1.23 | (0.41, 3.64)  | 1.80 | (0.58, 5.64)  | Chinese and Other | -    | -             | 2.69 | (0.81, 8.95)  | 1.60 | (0.62, 4.3)   | 2.81 | (0.84, 9.36)  | 2.63 | (0.78, 8.73)  | 1.72 | (0.49, 6.04)  | Unclassified          | -    | -             | 2.45  | (0.65, 9.26)  | 1.76 | (0.38, 8.21)  | 1.51 | (0.39, 5.79)  | 1.41 | (0.37, 5.41)  | 2.60 | (0.64, 10.54) |                    |      |               |      |               |      |              |      |               |      |               |      |               |                     |      |              |      |               |      |               |      |               |      |               |      |               |                        |      |               |       |                |       |                |       |               |       |                |       |               |                        |       |               |       |               |      |               |      |               |      |               |      |               |                                |     |   |      |               |      |              |      |              |      |              |      |               |              |      |               |       |                |       |                |       |               |       |                |       |               |                       |      |               |       |                |       |                |       |               |       |                |       |               |                                |      |               |      |              |      |              |      |              |      |              |      |              |                        |      |               |      |              |      |              |      |              |      |              |      |              |                  |      |               |       |               |       |               |      |               |      |               |       |               |                        |      |               |       |               |       |               |      |               |      |               |       |               |                        |      |               |      |              |      |              |      |              |      |              |      |              |                |      |               |      |              |      |               |      |              |      |              |      |               |                        |      |               |      |               |      |               |      |               |      |              |      |               |                                |       |              |      |              |      |              |      |              |      |              |      |              |                     |      |               |      |              |      |              |      |              |      |              |      |              |                        |      |               |      |               |      |               |      |               |      |              |      |               |                        |       |               |      |              |      |              |      |              |      |              |      |              |                     |      |               |      |              |      |              |      |              |      |              |      |              |                     |      |               |      |              |      |               |      |              |      |              |      |               |                       |   |   |      |              |      |              |      |              |      |             |      |             |                    |      |              |      |              |      |              |      |             |      |              |      |             |          |      |              |      |              |      |              |      |              |      |              |      |              |                        |      |               |      |               |      |               |      |               |      |               |      |               |                        |       |               |      |              |      |              |      |              |      |              |      |              |                   |      |              |      |              |      |              |      |              |      |              |      |              |              |      |               |      |              |      |              |      |               |      |               |      |               |            |      |               |      |              |      |              |      |               |      |               |      |               |                                |      |               |      |              |      |              |      |              |      |              |      |              |           |   |   |      |              |      |              |      |              |      |              |      |              |                  |   |   |   |   |   |   |   |   |   |   |   |   |                                |      |               |      |              |      |              |      |             |      |             |      |              |                                |      |               |      |              |      |              |      |              |      |              |      |              |                  |      |               |      |              |      |               |      |              |      |              |      |               |                     |      |               |      |              |      |              |      |             |      |             |      |              |                    |      |               |      |              |      |              |      |              |      |              |      |              |       |      |               |      |              |      |               |      |              |      |              |      |               |                        |      |               |      |               |      |               |      |               |      |              |      |               |                        |       |             |      |              |      |              |      |              |      |              |      |              |                    |   |   |      |              |      |             |      |              |      |              |      |              |                        |      |               |      |               |      |               |      |               |      |              |      |               |                        |       |               |      |               |      |               |      |               |      |              |      |               |                        |       |             |      |              |      |              |      |              |      |              |      |              |                   |   |   |      |              |      |              |      |              |      |              |      |               |              |   |   |      |              |      |              |      |              |      |              |      |               |
| White (comparator)                                                                                                                                                                                                                                                                                        | -                                | -             | -             | -                     | -     | -              | -                | -             | -              | -              | -     | -              |                      |      |              |      |               |      |              |      |              |      |               |      |               |                  |      |              |      |               |      |              |      |              |      |              |      |              |                        |      |               |      |               |      |               |      |               |      |               |      |               |                        |       |               |      |               |      |              |      |              |      |               |      |               |                   |      |               |      |               |      |               |      |               |      |               |      |               |                       |      |               |       |               |      |               |      |               |      |               |      |               |                    |      |               |      |               |      |              |      |               |      |               |      |               |                     |      |              |      |               |      |               |      |               |      |               |      |               |                        |      |               |       |                |       |                |       |               |       |                |       |               |                        |       |               |       |               |      |               |      |               |      |               |      |               |                                |     |   |      |               |      |              |      |              |      |              |      |               |              |      |               |       |                |       |                |       |               |       |                |       |               |                       |      |               |       |                |       |                |       |               |       |                |       |               |                                |      |               |      |              |      |              |      |              |      |              |      |              |                        |      |               |      |              |      |              |      |              |      |              |      |              |                  |      |               |       |               |       |               |      |               |      |               |       |               |                        |      |               |       |               |       |               |      |               |      |               |       |               |                        |      |               |      |              |      |              |      |              |      |              |      |              |                |      |               |      |              |      |               |      |              |      |              |      |               |                        |      |               |      |               |      |               |      |               |      |              |      |               |                                |       |              |      |              |      |              |      |              |      |              |      |              |                     |      |               |      |              |      |              |      |              |      |              |      |              |                        |      |               |      |               |      |               |      |               |      |              |      |               |                        |       |               |      |              |      |              |      |              |      |              |      |              |                     |      |               |      |              |      |              |      |              |      |              |      |              |                     |      |               |      |              |      |               |      |              |      |              |      |               |                       |   |   |      |              |      |              |      |              |      |             |      |             |                    |      |              |      |              |      |              |      |             |      |              |      |             |          |      |              |      |              |      |              |      |              |      |              |      |              |                        |      |               |      |               |      |               |      |               |      |               |      |               |                        |       |               |      |              |      |              |      |              |      |              |      |              |                   |      |              |      |              |      |              |      |              |      |              |      |              |              |      |               |      |              |      |              |      |               |      |               |      |               |            |      |               |      |              |      |              |      |               |      |               |      |               |                                |      |               |      |              |      |              |      |              |      |              |      |              |           |   |   |      |              |      |              |      |              |      |              |      |              |                  |   |   |   |   |   |   |   |   |   |   |   |   |                                |      |               |      |              |      |              |      |             |      |             |      |              |                                |      |               |      |              |      |              |      |              |      |              |      |              |                  |      |               |      |              |      |               |      |              |      |              |      |               |                     |      |               |      |              |      |              |      |             |      |             |      |              |                    |      |               |      |              |      |              |      |              |      |              |      |              |       |      |               |      |              |      |               |      |              |      |              |      |               |                        |      |               |      |               |      |               |      |               |      |              |      |               |                        |       |             |      |              |      |              |      |              |      |              |      |              |                    |   |   |      |              |      |             |      |              |      |              |      |              |                        |      |               |      |               |      |               |      |               |      |              |      |               |                        |       |               |      |               |      |               |      |               |      |              |      |               |                        |       |             |      |              |      |              |      |              |      |              |      |              |                   |   |   |      |              |      |              |      |              |      |              |      |               |              |   |   |      |              |      |              |      |              |      |              |      |               |
| Mixed                                                                                                                                                                                                                                                                                                     | -                                | -             | 0.45          | (0.06, 3.63)          | -     | -              | 0.54             | (0.11, 2.65)  | 0.50           | (0.1, 2.48)    | 0.73  | (0.14, 3.76)   |                      |      |              |      |               |      |              |      |              |      |               |      |               |                  |      |              |      |               |      |              |      |              |      |              |      |              |                        |      |               |      |               |      |               |      |               |      |               |      |               |                        |       |               |      |               |      |              |      |              |      |               |      |               |                   |      |               |      |               |      |               |      |               |      |               |      |               |                       |      |               |       |               |      |               |      |               |      |               |      |               |                    |      |               |      |               |      |              |      |               |      |               |      |               |                     |      |              |      |               |      |               |      |               |      |               |      |               |                        |      |               |       |                |       |                |       |               |       |                |       |               |                        |       |               |       |               |      |               |      |               |      |               |      |               |                                |     |   |      |               |      |              |      |              |      |              |      |               |              |      |               |       |                |       |                |       |               |       |                |       |               |                       |      |               |       |                |       |                |       |               |       |                |       |               |                                |      |               |      |              |      |              |      |              |      |              |      |              |                        |      |               |      |              |      |              |      |              |      |              |      |              |                  |      |               |       |               |       |               |      |               |      |               |       |               |                        |      |               |       |               |       |               |      |               |      |               |       |               |                        |      |               |      |              |      |              |      |              |      |              |      |              |                |      |               |      |              |      |               |      |              |      |              |      |               |                        |      |               |      |               |      |               |      |               |      |              |      |               |                                |       |              |      |              |      |              |      |              |      |              |      |              |                     |      |               |      |              |      |              |      |              |      |              |      |              |                        |      |               |      |               |      |               |      |               |      |              |      |               |                        |       |               |      |              |      |              |      |              |      |              |      |              |                     |      |               |      |              |      |              |      |              |      |              |      |              |                     |      |               |      |              |      |               |      |              |      |              |      |               |                       |   |   |      |              |      |              |      |              |      |             |      |             |                    |      |              |      |              |      |              |      |             |      |              |      |             |          |      |              |      |              |      |              |      |              |      |              |      |              |                        |      |               |      |               |      |               |      |               |      |               |      |               |                        |       |               |      |              |      |              |      |              |      |              |      |              |                   |      |              |      |              |      |              |      |              |      |              |      |              |              |      |               |      |              |      |              |      |               |      |               |      |               |            |      |               |      |              |      |              |      |               |      |               |      |               |                                |      |               |      |              |      |              |      |              |      |              |      |              |           |   |   |      |              |      |              |      |              |      |              |      |              |                  |   |   |   |   |   |   |   |   |   |   |   |   |                                |      |               |      |              |      |              |      |             |      |             |      |              |                                |      |               |      |              |      |              |      |              |      |              |      |              |                  |      |               |      |              |      |               |      |              |      |              |      |               |                     |      |               |      |              |      |              |      |             |      |             |      |              |                    |      |               |      |              |      |              |      |              |      |              |      |              |       |      |               |      |              |      |               |      |              |      |              |      |               |                        |      |               |      |               |      |               |      |               |      |              |      |               |                        |       |             |      |              |      |              |      |              |      |              |      |              |                    |   |   |      |              |      |             |      |              |      |              |      |              |                        |      |               |      |               |      |               |      |               |      |              |      |               |                        |       |               |      |               |      |               |      |               |      |              |      |               |                        |       |             |      |              |      |              |      |              |      |              |      |              |                   |   |   |      |              |      |              |      |              |      |              |      |               |              |   |   |      |              |      |              |      |              |      |              |      |               |
| Asian or Asian British                                                                                                                                                                                                                                                                                    | 9.62                             | (0.99, 91.54) | 8.07          | (3.05, 21.34)         | 4.65  | (1.72, 12.88)  | 4.66             | (1.74, 12.48) | 4.34           | (1.62, 11.6)   | 4.28  | (1.12, 16.46)  |                      |      |              |      |               |      |              |      |              |      |               |      |               |                  |      |              |      |               |      |              |      |              |      |              |      |              |                        |      |               |      |               |      |               |      |               |      |               |      |               |                        |       |               |      |               |      |              |      |              |      |               |      |               |                   |      |               |      |               |      |               |      |               |      |               |      |               |                       |      |               |       |               |      |               |      |               |      |               |      |               |                    |      |               |      |               |      |              |      |               |      |               |      |               |                     |      |              |      |               |      |               |      |               |      |               |      |               |                        |      |               |       |                |       |                |       |               |       |                |       |               |                        |       |               |       |               |      |               |      |               |      |               |      |               |                                |     |   |      |               |      |              |      |              |      |              |      |               |              |      |               |       |                |       |                |       |               |       |                |       |               |                       |      |               |       |                |       |                |       |               |       |                |       |               |                                |      |               |      |              |      |              |      |              |      |              |      |              |                        |      |               |      |              |      |              |      |              |      |              |      |              |                  |      |               |       |               |       |               |      |               |      |               |       |               |                        |      |               |       |               |       |               |      |               |      |               |       |               |                        |      |               |      |              |      |              |      |              |      |              |      |              |                |      |               |      |              |      |               |      |              |      |              |      |               |                        |      |               |      |               |      |               |      |               |      |              |      |               |                                |       |              |      |              |      |              |      |              |      |              |      |              |                     |      |               |      |              |      |              |      |              |      |              |      |              |                        |      |               |      |               |      |               |      |               |      |              |      |               |                        |       |               |      |              |      |              |      |              |      |              |      |              |                     |      |               |      |              |      |              |      |              |      |              |      |              |                     |      |               |      |              |      |               |      |              |      |              |      |               |                       |   |   |      |              |      |              |      |              |      |             |      |             |                    |      |              |      |              |      |              |      |             |      |              |      |             |          |      |              |      |              |      |              |      |              |      |              |      |              |                        |      |               |      |               |      |               |      |               |      |               |      |               |                        |       |               |      |              |      |              |      |              |      |              |      |              |                   |      |              |      |              |      |              |      |              |      |              |      |              |              |      |               |      |              |      |              |      |               |      |               |      |               |            |      |               |      |              |      |              |      |               |      |               |      |               |                                |      |               |      |              |      |              |      |              |      |              |      |              |           |   |   |      |              |      |              |      |              |      |              |      |              |                  |   |   |   |   |   |   |   |   |   |   |   |   |                                |      |               |      |              |      |              |      |             |      |             |      |              |                                |      |               |      |              |      |              |      |              |      |              |      |              |                  |      |               |      |              |      |               |      |              |      |              |      |               |                     |      |               |      |              |      |              |      |             |      |             |      |              |                    |      |               |      |              |      |              |      |              |      |              |      |              |       |      |               |      |              |      |               |      |              |      |              |      |               |                        |      |               |      |               |      |               |      |               |      |              |      |               |                        |       |             |      |              |      |              |      |              |      |              |      |              |                    |   |   |      |              |      |             |      |              |      |              |      |              |                        |      |               |      |               |      |               |      |               |      |              |      |               |                        |       |               |      |               |      |               |      |               |      |              |      |               |                        |       |             |      |              |      |              |      |              |      |              |      |              |                   |   |   |      |              |      |              |      |              |      |              |      |               |              |   |   |      |              |      |              |      |              |      |              |      |               |
| Black or Black British                                                                                                                                                                                                                                                                                    | 16.40                            | (2.7, 99.6)   | 0.90          | (0.24, 3.33)          | 2.46  | (0.82, 7.31)   | 1.80             | (0.64, 3.87)  | 1.23           | (0.41, 3.64)   | 1.80  | (0.58, 5.64)   |                      |      |              |      |               |      |              |      |              |      |               |      |               |                  |      |              |      |               |      |              |      |              |      |              |      |              |                        |      |               |      |               |      |               |      |               |      |               |      |               |                        |       |               |      |               |      |              |      |              |      |               |      |               |                   |      |               |      |               |      |               |      |               |      |               |      |               |                       |      |               |       |               |      |               |      |               |      |               |      |               |                    |      |               |      |               |      |              |      |               |      |               |      |               |                     |      |              |      |               |      |               |      |               |      |               |      |               |                        |      |               |       |                |       |                |       |               |       |                |       |               |                        |       |               |       |               |      |               |      |               |      |               |      |               |                                |     |   |      |               |      |              |      |              |      |              |      |               |              |      |               |       |                |       |                |       |               |       |                |       |               |                       |      |               |       |                |       |                |       |               |       |                |       |               |                                |      |               |      |              |      |              |      |              |      |              |      |              |                        |      |               |      |              |      |              |      |              |      |              |      |              |                  |      |               |       |               |       |               |      |               |      |               |       |               |                        |      |               |       |               |       |               |      |               |      |               |       |               |                        |      |               |      |              |      |              |      |              |      |              |      |              |                |      |               |      |              |      |               |      |              |      |              |      |               |                        |      |               |      |               |      |               |      |               |      |              |      |               |                                |       |              |      |              |      |              |      |              |      |              |      |              |                     |      |               |      |              |      |              |      |              |      |              |      |              |                        |      |               |      |               |      |               |      |               |      |              |      |               |                        |       |               |      |              |      |              |      |              |      |              |      |              |                     |      |               |      |              |      |              |      |              |      |              |      |              |                     |      |               |      |              |      |               |      |              |      |              |      |               |                       |   |   |      |              |      |              |      |              |      |             |      |             |                    |      |              |      |              |      |              |      |             |      |              |      |             |          |      |              |      |              |      |              |      |              |      |              |      |              |                        |      |               |      |               |      |               |      |               |      |               |      |               |                        |       |               |      |              |      |              |      |              |      |              |      |              |                   |      |              |      |              |      |              |      |              |      |              |      |              |              |      |               |      |              |      |              |      |               |      |               |      |               |            |      |               |      |              |      |              |      |               |      |               |      |               |                                |      |               |      |              |      |              |      |              |      |              |      |              |           |   |   |      |              |      |              |      |              |      |              |      |              |                  |   |   |   |   |   |   |   |   |   |   |   |   |                                |      |               |      |              |      |              |      |             |      |             |      |              |                                |      |               |      |              |      |              |      |              |      |              |      |              |                  |      |               |      |              |      |               |      |              |      |              |      |               |                     |      |               |      |              |      |              |      |             |      |             |      |              |                    |      |               |      |              |      |              |      |              |      |              |      |              |       |      |               |      |              |      |               |      |              |      |              |      |               |                        |      |               |      |               |      |               |      |               |      |              |      |               |                        |       |             |      |              |      |              |      |              |      |              |      |              |                    |   |   |      |              |      |             |      |              |      |              |      |              |                        |      |               |      |               |      |               |      |               |      |              |      |               |                        |       |               |      |               |      |               |      |               |      |              |      |               |                        |       |             |      |              |      |              |      |              |      |              |      |              |                   |   |   |      |              |      |              |      |              |      |              |      |               |              |   |   |      |              |      |              |      |              |      |              |      |               |
| Chinese and Other                                                                                                                                                                                                                                                                                         | -                                | -             | 2.69          | (0.81, 8.95)          | 1.60  | (0.62, 4.3)    | 2.81             | (0.84, 9.36)  | 2.63           | (0.78, 8.73)   | 1.72  | (0.49, 6.04)   |                      |      |              |      |               |      |              |      |              |      |               |      |               |                  |      |              |      |               |      |              |      |              |      |              |      |              |                        |      |               |      |               |      |               |      |               |      |               |      |               |                        |       |               |      |               |      |              |      |              |      |               |      |               |                   |      |               |      |               |      |               |      |               |      |               |      |               |                       |      |               |       |               |      |               |      |               |      |               |      |               |                    |      |               |      |               |      |              |      |               |      |               |      |               |                     |      |              |      |               |      |               |      |               |      |               |      |               |                        |      |               |       |                |       |                |       |               |       |                |       |               |                        |       |               |       |               |      |               |      |               |      |               |      |               |                                |     |   |      |               |      |              |      |              |      |              |      |               |              |      |               |       |                |       |                |       |               |       |                |       |               |                       |      |               |       |                |       |                |       |               |       |                |       |               |                                |      |               |      |              |      |              |      |              |      |              |      |              |                        |      |               |      |              |      |              |      |              |      |              |      |              |                  |      |               |       |               |       |               |      |               |      |               |       |               |                        |      |               |       |               |       |               |      |               |      |               |       |               |                        |      |               |      |              |      |              |      |              |      |              |      |              |                |      |               |      |              |      |               |      |              |      |              |      |               |                        |      |               |      |               |      |               |      |               |      |              |      |               |                                |       |              |      |              |      |              |      |              |      |              |      |              |                     |      |               |      |              |      |              |      |              |      |              |      |              |                        |      |               |      |               |      |               |      |               |      |              |      |               |                        |       |               |      |              |      |              |      |              |      |              |      |              |                     |      |               |      |              |      |              |      |              |      |              |      |              |                     |      |               |      |              |      |               |      |              |      |              |      |               |                       |   |   |      |              |      |              |      |              |      |             |      |             |                    |      |              |      |              |      |              |      |             |      |              |      |             |          |      |              |      |              |      |              |      |              |      |              |      |              |                        |      |               |      |               |      |               |      |               |      |               |      |               |                        |       |               |      |              |      |              |      |              |      |              |      |              |                   |      |              |      |              |      |              |      |              |      |              |      |              |              |      |               |      |              |      |              |      |               |      |               |      |               |            |      |               |      |              |      |              |      |               |      |               |      |               |                                |      |               |      |              |      |              |      |              |      |              |      |              |           |   |   |      |              |      |              |      |              |      |              |      |              |                  |   |   |   |   |   |   |   |   |   |   |   |   |                                |      |               |      |              |      |              |      |             |      |             |      |              |                                |      |               |      |              |      |              |      |              |      |              |      |              |                  |      |               |      |              |      |               |      |              |      |              |      |               |                     |      |               |      |              |      |              |      |             |      |             |      |              |                    |      |               |      |              |      |              |      |              |      |              |      |              |       |      |               |      |              |      |               |      |              |      |              |      |               |                        |      |               |      |               |      |               |      |               |      |              |      |               |                        |       |             |      |              |      |              |      |              |      |              |      |              |                    |   |   |      |              |      |             |      |              |      |              |      |              |                        |      |               |      |               |      |               |      |               |      |              |      |               |                        |       |               |      |               |      |               |      |               |      |              |      |               |                        |       |             |      |              |      |              |      |              |      |              |      |              |                   |   |   |      |              |      |              |      |              |      |              |      |               |              |   |   |      |              |      |              |      |              |      |              |      |               |
| Unclassified                                                                                                                                                                                                                                                                                              | -                                | -             | 2.45          | (0.65, 9.26)          | 1.76  | (0.38, 8.21)   | 1.51             | (0.39, 5.79)  | 1.41           | (0.37, 5.41)   | 2.60  | (0.64, 10.54)  |                      |      |              |      |               |      |              |      |              |      |               |      |               |                  |      |              |      |               |      |              |      |              |      |              |      |              |                        |      |               |      |               |      |               |      |               |      |               |      |               |                        |       |               |      |               |      |              |      |              |      |               |      |               |                   |      |               |      |               |      |               |      |               |      |               |      |               |                       |      |               |       |               |      |               |      |               |      |               |      |               |                    |      |               |      |               |      |              |      |               |      |               |      |               |                     |      |              |      |               |      |               |      |               |      |               |      |               |                        |      |               |       |                |       |                |       |               |       |                |       |               |                        |       |               |       |               |      |               |      |               |      |               |      |               |                                |     |   |      |               |      |              |      |              |      |              |      |               |              |      |               |       |                |       |                |       |               |       |                |       |               |                       |      |               |       |                |       |                |       |               |       |                |       |               |                                |      |               |      |              |      |              |      |              |      |              |      |              |                        |      |               |      |              |      |              |      |              |      |              |      |              |                  |      |               |       |               |       |               |      |               |      |               |       |               |                        |      |               |       |               |       |               |      |               |      |               |       |               |                        |      |               |      |              |      |              |      |              |      |              |      |              |                |      |               |      |              |      |               |      |              |      |              |      |               |                        |      |               |      |               |      |               |      |               |      |              |      |               |                                |       |              |      |              |      |              |      |              |      |              |      |              |                     |      |               |      |              |      |              |      |              |      |              |      |              |                        |      |               |      |               |      |               |      |               |      |              |      |               |                        |       |               |      |              |      |              |      |              |      |              |      |              |                     |      |               |      |              |      |              |      |              |      |              |      |              |                     |      |               |      |              |      |               |      |              |      |              |      |               |                       |   |   |      |              |      |              |      |              |      |             |      |             |                    |      |              |      |              |      |              |      |             |      |              |      |             |          |      |              |      |              |      |              |      |              |      |              |      |              |                        |      |               |      |               |      |               |      |               |      |               |      |               |                        |       |               |      |              |      |              |      |              |      |              |      |              |                   |      |              |      |              |      |              |      |              |      |              |      |              |              |      |               |      |              |      |              |      |               |      |               |      |               |            |      |               |      |              |      |              |      |               |      |               |      |               |                                |      |               |      |              |      |              |      |              |      |              |      |              |           |   |   |      |              |      |              |      |              |      |              |      |              |                  |   |   |   |   |   |   |   |   |   |   |   |   |                                |      |               |      |              |      |              |      |             |      |             |      |              |                                |      |               |      |              |      |              |      |              |      |              |      |              |                  |      |               |      |              |      |               |      |              |      |              |      |               |                     |      |               |      |              |      |              |      |             |      |             |      |              |                    |      |               |      |              |      |              |      |              |      |              |      |              |       |      |               |      |              |      |               |      |              |      |              |      |               |                        |      |               |      |               |      |               |      |               |      |              |      |               |                        |       |             |      |              |      |              |      |              |      |              |      |              |                    |   |   |      |              |      |             |      |              |      |              |      |              |                        |      |               |      |               |      |               |      |               |      |              |      |               |                        |       |               |      |               |      |               |      |               |      |              |      |               |                        |       |             |      |              |      |              |      |              |      |              |      |              |                   |   |   |      |              |      |              |      |              |      |              |      |               |              |   |   |      |              |      |              |      |              |      |              |      |               |

| Indicator                                                                                                                                                                                                                                                                                                |                        |                                             |                     |                                             |                     |                                             |                       |                                             |                    |                                             |                    |                                             |                     |                                             |                    |                                             |                   |
|----------------------------------------------------------------------------------------------------------------------------------------------------------------------------------------------------------------------------------------------------------------------------------------------------------|------------------------|---------------------------------------------|---------------------|---------------------------------------------|---------------------|---------------------------------------------|-----------------------|---------------------------------------------|--------------------|---------------------------------------------|--------------------|---------------------------------------------|---------------------|---------------------------------------------|--------------------|---------------------------------------------|-------------------|
| Domain: Mental health                                                                                                                                                                                                                                                                                    |                        |                                             |                     |                                             |                     |                                             |                       |                                             |                    |                                             |                    |                                             |                     |                                             |                    |                                             |                   |
| The proportion of people who have received three or more prescriptions for an antipsychotic in the preceding 12 months, and who have a record of blood testing (fasting glucose, HbA1c, lipid profile, urea and electrolytes, full blood count, liver function test), body mass index and blood pressure |                        |                                             |                     |                                             |                     |                                             |                       |                                             |                    |                                             |                    |                                             |                     |                                             |                    |                                             |                   |
| Variable                                                                                                                                                                                                                                                                                                 | Fasting glucose        |                                             | HbA1c               |                                             | Lipid profile       |                                             | Urea and electrolytes |                                             | Full blood count   |                                             | Liver function     |                                             | BMI                 |                                             | Blood Pressure     |                                             |                   |
|                                                                                                                                                                                                                                                                                                          | OR (95% CI)            | Probability of achieving indicator (95% CI) | OR (95% CI)         | Probability of achieving indicator (95% CI) | OR (95% CI)         | Probability of achieving indicator (95% CI) | OR (95% CI)           | Probability of achieving indicator (95% CI) | OR (95% CI)        | Probability of achieving indicator (95% CI) | OR (95% CI)        | Probability of achieving indicator (95% CI) | OR (95% CI)         | Probability of achieving indicator (95% CI) | OR (95% CI)        | Probability of achieving indicator (95% CI) |                   |
| <b>Year</b>                                                                                                                                                                                                                                                                                              |                        |                                             |                     |                                             |                     |                                             |                       |                                             |                    |                                             |                    |                                             |                     |                                             |                    |                                             |                   |
| 2017/18 (comparator)                                                                                                                                                                                                                                                                                     | 1.0                    | 0.1 (7.25, 77.4)                            | 1.0                 | 0.29 (11.38, 11.96)                         | 1.0                 | 0.21 (14.26, 14.67)                         | 1.0                   | 0.47 (11.46, 12.4)                          | 1.0                | 0.48 (10.43, 11.38)                         | 1.0                | 0.44 (10.45, 11.55)                         | 1.0                 | 0.72 (11.28, 12.71)                         | 1.0                | 0.83 (0.78, 0.89)                           |                   |
| 2018/19                                                                                                                                                                                                                                                                                                  | 0.25 (0.01, 2.39)      | 0.04 (28.03, 28.7)                          | 0.11 (0.15, 0.51)   | 0.14 (1.34, 5.62)                           | 0.49 (0.28, 0.85)   | 0.13 (0.06, 0.3)                            | 0.32 (0.16, 0.33)     | 0.21 (1.22, 1.64)                           | 0.35 (0.16, 0.39)  | 0.21 (4.09, 5.44)                           | 0.16 (0.1, 0.29)   | 0.17 (4.4, 4.3)                             | 0.17 (0.1, 0.28)    | 0.37 (5.76, 6.48)                           | 0.09 (0.05, 0.15)  | 0.38 (0.33, 0.43)                           |                   |
| 2019/20                                                                                                                                                                                                                                                                                                  | -                      | -                                           | 0.22 (0.13, 0.39)   | 0.11 (4.24, 4.45)                           | 0.31 (0.17, 0.57)   | 0.09 (4.54, 4.73)                           | 0.13 (0.08, 0.21)     | 0.14 (3.34, 3.61)                           | 0.12 (0.08, 0.2)   | 0.14 (3.09, 3.37)                           | 0.06 (0.03, 0.11)  | 0.08 (1.85, 2)                              | 0.02 (0.01, 0.03)   | 0.08 (1.25, 1.41)                           | 0.01 (0.02, 0.06)  | 0.21 (0.16, 0.25)                           |                   |
| <b>Prison</b>                                                                                                                                                                                                                                                                                            |                        |                                             |                     |                                             |                     |                                             |                       |                                             |                    |                                             |                    |                                             |                     |                                             |                    |                                             |                   |
| Prison 1                                                                                                                                                                                                                                                                                                 | 3.44 (0.03, 439.92)    | 0.11 (84.41, 84.62)                         | 2.03 (0.4, 10.43)   | -                                           | 0.55 (0.05, 5.56)   | -                                           | 1.61 (0.47, 5.49)     | -                                           | 2.48 (0.78, 7.88)  | -                                           | 3.19 (0.86, 11.84) | -                                           | 4.12 (1.31, 13.06)  | -                                           | 2.24 (0.77, 6.48)  | -                                           |                   |
| Prison 2                                                                                                                                                                                                                                                                                                 | -                      | -                                           | 5.23 (1.66, 16.41)  | -                                           | 0.6 (0.13, 2.9)     | -                                           | 2.32 (1.5, 3.9)       | -                                           | 2.1 (0.99, 5.33)   | -                                           | 1.99 (0.79, 5.44)  | -                                           | 2.49 (1.15, 5.37)   | -                                           | 2.14 (1.1, 4.16)   | -                                           |                   |
| Prison 3                                                                                                                                                                                                                                                                                                 | 0.08 (0, 28.17)        | 0.01 (4.66, 6.68)                           | 3.99 (1.07, 15.86)  | -                                           | 4.31 (1.26, 14.58)  | -                                           | 4.01 (1.7, 9.5)       | -                                           | 4.51 (1.92, 10.62) | -                                           | 1.49 (0.6, 4.2)    | -                                           | 13.26 (5.64, 31.09) | -                                           | 5.22 (2.51, 10.88) | -                                           |                   |
| Prison 4                                                                                                                                                                                                                                                                                                 | -                      | -                                           | 1.18 (0.24, 4.92)   | -                                           | 2.52 (0.69, 9.21)   | -                                           | 1.44 (0.55, 3.76)     | -                                           | 1.38 (0.51, 3.55)  | -                                           | 2.02 (0.68, 6.07)  | -                                           | 1.26 (0.48, 3.4)    | -                                           | 1.28 (0.56, 2.76)  | -                                           |                   |
| Prison 5                                                                                                                                                                                                                                                                                                 | -                      | -                                           | -                   | -                                           | 4.31 (0.3, 62.02)   | -                                           | 1.41 (0.1, 19.53)     | -                                           | 1.48 (0.11, 20.48) | -                                           | 2.37 (0.15, 37.67) | -                                           | 1.65 (0.13, 21.22)  | -                                           | 0.47 (0.04, 5.49)  | -                                           |                   |
| Prison 6                                                                                                                                                                                                                                                                                                 | -                      | -                                           | 8.01 (0.86, 86.60)  | -                                           | 1.38 (0.11, 15.09)  | -                                           | 3.18 (0.78, 15.79)    | -                                           | 3.58 (0.74, 15.10) | -                                           | 8.52 (1.28, 53.14) | -                                           | 7.68 (1.52, 38.32)  | -                                           | 3.47 (0.53, 14.99) | -                                           |                   |
| Prison 7                                                                                                                                                                                                                                                                                                 | -                      | -                                           | 5.04 (1.41, 17.98)  | -                                           | 5.13 (1.46, 18.23)  | -                                           | 3.32 (1.3, 8.49)      | -                                           | 3.64 (1.44, 9.22)  | -                                           | 5.88 (2.02, 16.58) | -                                           | 2.03 (0.86, 4.8)    | -                                           | 1.17 (0.7, 1.77)   | -                                           |                   |
| Prison 8                                                                                                                                                                                                                                                                                                 | -                      | -                                           | 5.73 (1.75, 18.72)  | -                                           | 2.52 (0.69, 9.13)   | -                                           | 3.51 (1.47, 8.39)     | -                                           | 3.69 (1.28, 12.44) | -                                           | 4.06 (1.46, 11.23) | -                                           | 4.33 (1.88, 9.95)   | -                                           | 2.22 (1.06, 4.65)  | -                                           |                   |
| Prison 9                                                                                                                                                                                                                                                                                                 | 10.18 (0.02, 5175.59)  | 0.19 (153.34, 153.73)                       | 12.11 (3.44, 42.58) | -                                           | 12.22 (3.38, 44.09) | -                                           | 4.48 (1.66, 12.32)    | -                                           | 6.93 (2.58, 18.62) | -                                           | 9.63 (3.14, 29.56) | -                                           | 13.17 (4.72, 36.74) | -                                           | 5.29 (2.06, 13.23) | -                                           |                   |
| Prison 10                                                                                                                                                                                                                                                                                                | -                      | 0.05 (40.98, 40.99)                         | 1.65 (0.33, 8.27)   | -                                           | 0.61 (0.06, 5.95)   | -                                           | 1.71 (0.56, 5.26)     | -                                           | 1.77 (0.55, 5.42)  | -                                           | 1.7 (0.66, 4.28)   | -                                           | 2.17 (0.67, 7.02)   | -                                           | 2.64 (0.98, 7.29)  | -                                           |                   |
| Prison 11 (comparator)                                                                                                                                                                                                                                                                                   | 1.0                    | -                                           | 1.0                 | -                                           | 1.0                 | -                                           | 1.0                   | -                                           | 1.0                | -                                           | 1.0                | -                                           | 1.0                 | -                                           | 1.0                | -                                           |                   |
| Prison 12                                                                                                                                                                                                                                                                                                | -                      | -                                           | -                   | -                                           | -                   | -                                           | -                     | -                                           | -                  | -                                           | -                  | -                                           | -                   | -                                           | -                  | -                                           |                   |
| Prison 13                                                                                                                                                                                                                                                                                                | -                      | -                                           | 7.1 (4.02, 26.56)   | -                                           | 5.09 (1.29, 20.05)  | -                                           | 2.99 (0.99, 8.97)     | -                                           | 3.26 (1.09, 9.81)  | -                                           | 4.18 (1.22, 14.33) | -                                           | 6.85 (2.13, 22.08)  | -                                           | 2.82 (0.98, 8.15)  | -                                           |                   |
| <b>Prison category</b>                                                                                                                                                                                                                                                                                   |                        |                                             |                     |                                             |                     |                                             |                       |                                             |                    |                                             |                    |                                             |                     |                                             |                    |                                             |                   |
| A (comparator)                                                                                                                                                                                                                                                                                           | -                      | -                                           | -                   | -                                           | -                   | -                                           | -                     | -                                           | -                  | -                                           | -                  | -                                           | -                   | -                                           | -                  | -                                           |                   |
| B                                                                                                                                                                                                                                                                                                        | -                      | -                                           | -                   | -                                           | -                   | -                                           | -                     | -                                           | -                  | -                                           | -                  | -                                           | -                   | -                                           | -                  | -                                           |                   |
| C                                                                                                                                                                                                                                                                                                        | -                      | -                                           | -                   | -                                           | -                   | -                                           | -                     | -                                           | -                  | -                                           | -                  | -                                           | -                   | -                                           | -                  | -                                           |                   |
| Closed                                                                                                                                                                                                                                                                                                   | -                      | -                                           | -                   | -                                           | -                   | -                                           | -                     | -                                           | -                  | -                                           | -                  | -                                           | -                   | -                                           | -                  | -                                           |                   |
| D                                                                                                                                                                                                                                                                                                        | -                      | -                                           | -                   | -                                           | -                   | -                                           | -                     | -                                           | -                  | -                                           | -                  | -                                           | -                   | -                                           | -                  | -                                           |                   |
| YOI                                                                                                                                                                                                                                                                                                      | -                      | -                                           | -                   | -                                           | -                   | -                                           | -                     | -                                           | -                  | -                                           | -                  | -                                           | -                   | -                                           | -                  | -                                           |                   |
| <b>Gender</b>                                                                                                                                                                                                                                                                                            |                        |                                             |                     |                                             |                     |                                             |                       |                                             |                    |                                             |                    |                                             |                     |                                             |                    |                                             |                   |
| Female (comparator)                                                                                                                                                                                                                                                                                      | 1.0                    | -                                           | 1.0                 | -                                           | 1.0                 | -                                           | 1.0                   | -                                           | 1.0                | -                                           | 1.0                | -                                           | 1.0                 | -                                           | 1.0                | -                                           |                   |
| Male                                                                                                                                                                                                                                                                                                     | -                      | 0.07 (55.32, 55.66)                         | -                   | -                                           | -                   | -                                           | -                     | -                                           | -                  | -                                           | -                  | -                                           | -                   | -                                           | -                  | -                                           |                   |
| <b>Age - years</b>                                                                                                                                                                                                                                                                                       |                        |                                             |                     |                                             |                     |                                             |                       |                                             |                    |                                             |                    |                                             |                     |                                             |                    |                                             |                   |
| 10 - <20                                                                                                                                                                                                                                                                                                 | -                      | -                                           | -                   | -                                           | -                   | -                                           | -                     | -                                           | -                  | -                                           | -                  | -                                           | -                   | 2.55 (0.11, 49.01)                          | 0.47 (7.37, 8.31)  | 1.87 (0.13, 26.01)                          | 0.49 (0.07, 0.82) |
| 20 - <30                                                                                                                                                                                                                                                                                                 | -                      | -                                           | 0.7 (0.36, 1.37)    | 0.12 (4.8, 5.15)                            | 0.57 (0.26, 1.24)   | 0.1 (4.72, 6.91)                            | 0.61 (0.35, 1.07)     | 0.2 (4.91, 5.31)                            | 0.59 (0.33, 1.03)  | 0.2 (4.3, 4.69)                             | 0.64 (0.35, 1.19)  | 0.17 (4.23, 4.58)                           | 0.17 (4.23, 4.58)   | 0.34 (5.42, 6.11)                           | 1.08 (0.65, 1.8)   | 0.41 (0.35, 0.47)                           |                   |
| 30 - <40 (comparator)                                                                                                                                                                                                                                                                                    | 1.0                    | 0.15 (1.09, 19.34)                          | 1.0                 | 0.16 (4.27, 6.59)                           | 1.0                 | 0.14 (9.85, 10.13)                          | 1.0                   | 0.21 (6.53, 7.06)                           | 1.0                | 0.21 (5.84, 6.38)                           | 1.0                | 0.22 (5.41, 5.86)                           | 1.0                 | 0.34 (5.32, 6)                              | 1.0                | 0.39 (0.35, 0.44)                           |                   |
| 40 - <50                                                                                                                                                                                                                                                                                                 | 0.02 (0, 1.63)         | 0.01 (9.42, 9.48)                           | 1.27 (0.74, 2.16)   | 0.19 (1.32, 7.69)                           | 1.07 (0.59, 1.96)   | 0.15 (0.3, 10.6)                            | 0.09 (0.56, 1.43)     | 0.21 (4.12, 6.61)                           | 0.09 (0.61, 1.56)  | 0.26 (1.57, 6.3)                            | 0.69 (0.4, 1.16)   | 0.18 (4.49, 4.76)                           | 0.07 (0.58, 1.57)   | 0.33 (5.25, 5.82)                           | 1.36 (0.87, 2.14)  | 0.44 (0.39, 0.49)                           |                   |
| 50 - <60                                                                                                                                                                                                                                                                                                 | 0.11 (0, 2.81)         | 0.04 (33.75, 33.83)                         | 1.59 (0.83, 3.07)   | 0.21 (4.8, 4.83)                            | 1.57 (0.73, 3.18)   | 0.19 (11.04, 13.41)                         | 1.1 (0.6, 2.01)       | 0.26 (4.88, 7.43)                           | 1.42 (0.78, 2.59)  | 0.32 (1.7, 7.64)                            | 1.01 (0.52, 1.96)  | 0.21 (5.4, 5.89)                            | 1.34 (0.7, 2.58)    | 0.31 (5.84, 6.7)                            | 1.38 (0.74, 2.4)   | 0.44 (0.36, 0.51)                           |                   |
| 60 - <70                                                                                                                                                                                                                                                                                                 | 0.74 (0.04, 15.77)     | 0.13 (101.5, 102.05)                        | 1.55 (0.48, 4.91)   | 0.21 (4.27, 8.69)                           | 0.64 (0.17, 2.47)   | 0.11 (7.3, 7.51)                            | 4.39 (1.49, 12.97)    | 0.52 (12.73, 13.76)                         | 3.96 (1.34, 11.74) | 0.5 (0.08, 11.89)                           | 4.09 (1.35, 12.38) | 0.42 (6.25, 11.09)                          | 8.46 (2.38, 31.13)  | 0.64 (10.06, 11.33)                         | 9.33 (2.17, 40.07) | 0.75 (0.54, 0.96)                           |                   |
| 70 - <80                                                                                                                                                                                                                                                                                                 | 2.54 (0.14, 45.65)     | 0.24 (109.21, 109.68)                       | 1.3 (0.3, 5.68)     | 0.19 (4.78, 7.81)                           | 0.67 (0.14, 3.26)   | 0.11 (7.48, 7.71)                           | 0.31 (0.08, 1.77)     | 0.15 (1.6, 3.9)                             | 0.51 (0.12, 2.11)  | 0.19 (4.65, 4.42)                           | 1.36 (0.31, 6.05)  | 0.26 (6.34, 6.47)                           | 0.1 (0.02, 0.62)    | 0.1 (5.54, 1.76)                            | 1.02 (0.21, 4.39)  | 0.4 (0.19, 0.61)                            |                   |
| 80 - <90                                                                                                                                                                                                                                                                                                 | -                      | -                                           | -                   | -                                           | -                   | -                                           | -                     | -                                           | -                  | -                                           | -                  | -                                           | -                   | -                                           | -                  | -                                           |                   |
| 90 - <100                                                                                                                                                                                                                                                                                                | -                      | -                                           | -                   | -                                           | -                   | -                                           | -                     | -                                           | -                  | -                                           | -                  | -                                           | -                   | -                                           | -                  | -                                           |                   |
| 100 - <110                                                                                                                                                                                                                                                                                               | -                      | -                                           | -                   | -                                           | -                   | -                                           | -                     | -                                           | -                  | -                                           | -                  | -                                           | -                   | -                                           | -                  | -                                           |                   |
| <b>Length of Stay (months)</b>                                                                                                                                                                                                                                                                           |                        |                                             |                     |                                             |                     |                                             |                       |                                             |                    |                                             |                    |                                             |                     |                                             |                    |                                             |                   |
| <1                                                                                                                                                                                                                                                                                                       | 1.0                    | -                                           | 1.0                 | 0.13 (2.34, 5.51)                           | 1.0                 | 0.09 (4.5, 6.48)                            | 1.0                   | 0.19 (4.69, 5.07)                           | 1.0                | 0.2 (4.42, 4.82)                            | 1.0                | 0.18 (4.38, 4.73)                           | 1.0                 | 0.41 (4.88, 7.55)                           | 1.0                | 0.46 (0.37, 0.54)                           |                   |
| 1-4 (comparator)                                                                                                                                                                                                                                                                                         | -                      | 0.07 (57.62, 57.76)                         | -                   | 0.13 (3.02, 3.27)                           | -                   | 0.09 (4.19, 6.36)                           | -                     | 0.21 (4.81, 5.2)                            | -                  | 0.21 (4.57, 4.99)                           | -                  | 0.15 (3.73, 4.04)                           | -                   | 0.31 (4.86, 5.48)                           | -                  | 0.37 (0.32, 0.42)                           |                   |
| 5-12                                                                                                                                                                                                                                                                                                     | 4.37 (0.03, 611.38)    | 0.16 (131.19, 131.52)                       | 1.19 (0.61, 2.31)   | 0.14 (5.67, 5.96)                           | 1.21 (0.54, 2.72)   | 0.1 (7.16, 7.37)                            | 1.15 (0.66, 2.01)     | 0.21 (5.26, 5.69)                           | 0.24 (0.72, 2.16)  | 0.24 (5.22, 5.7)                            | 1.53 (0.81, 2.88)  | 0.2 (4.83, 5.23)                            | 1.38 (0.78, 2.43)   | 0.35 (5.53, 6.2)                            | 0.92 (0.55, 1.56)  | 0.36 (0.31, 0.42)                           |                   |
| 13-24                                                                                                                                                                                                                                                                                                    | 4.77 (0.01, 1526.23)   | 0.17 (138.62, 138.98)                       | 1.81 (0.9, 3.63)    | 0.19 (7.57, 7.98)                           | 2.49 (1.12, 5.38)   | 0.17 (11.88, 12.29)                         | 1.92 (1.07, 3.45)     | 0.29 (1.15, 7.1)                            | 1.9 (0.89, 4.19)   | 0.29 (4.49, 6.88)                           | 1.79 (0.91, 3.5)   | 0.22 (5.29, 5.73)                           | 1.66 (0.91, 3.09)   | 0.37 (5.99, 6.64)                           | 1.83 (1.08, 3.29)  | 0.47 (0.29, 0.56)                           |                   |
| 25+                                                                                                                                                                                                                                                                                                      | 0.5 (0, 199.56)        | 0.04 (53.84, 55.9)                          | 2.51 (1.21, 5.31)   | 0.24 (4.35, 9.42)                           | 3.13 (1.39, 7.03)   | 0.2 (4.92, 14.2)                            | 3.51 (1.75, 6.49)     | 0.29 (4.82, 10.3)                           | 2.95 (1.53, 5.68)  | 0.36 (4.27, 9.63)                           | 3.16 (1.54, 6.5)   | 0.3 (7.14, 7.73)                            | 1.17 (0.64, 2.17)   | 0.38 (5.15, 5.8)                            | 2.61 (1.52, 5.26)  | 0.51 (0.45, 0.62)                           |                   |
| <b>Ethnic Group</b>                                                                                                                                                                                                                                                                                      |                        |                                             |                     |                                             |                     |                                             |                       |                                             |                    |                                             |                    |                                             |                     |                                             |                    |                                             |                   |
| White (comparator)                                                                                                                                                                                                                                                                                       | 1.0                    | 0.04 (35.29, 35.38)                         | 1.0                 | 0.16 (4.46, 4.77)                           | 1.0                 | 0.13 (4.29, 9.55)                           | 1.0                   | 0.25 (4.19, 6.69)                           | 1.0                | 0.26 (5.74, 6.27)                           | 1.0                | 0.21 (4.98, 5.39)                           | 1.0                 | 0.35 (5.48, 6.18)                           | 1.0                | 0.43 (0.4, 0.46)                            |                   |
| Mixed                                                                                                                                                                                                                                                                                                    | -                      | -                                           | 0.27 (0.03, 2.29)   | 0.06 (2.48, 2.61)                           | -                   | 0.06 (2.48, 2.61)                           | 0.41 (0.08, 2.05)     | 0.15 (3.57, 3.87)                           | 0.37 (0.07, 1.88)  | 0.14 (3.13, 3.45)                           | 0.53 (0.1, 2.83)   | 0.14 (3.45, 3.74)                           | 0.51 (0.12, 2.25)   | 0.26 (4.15, 4.68)                           | 0.22 (0.05, 1.02)  | 0.23 (0.07, 0.4)                            |                   |
| Asian or Asian British                                                                                                                                                                                                                                                                                   | 196.3 (1.12, 32920.52) | 0.51 (422.77, 423.82)                       | 6.09 (2.2, 20.32)   | 0.45 (1.01, 18.33)                          | 3.41 (1.06, 11.02)  | 0.27 (3.8, 19.47)                           | 3.83 (2.1, 14.46)     | 0.45 (1.19, 12.57)                          | 3.42 (1.15, 10.38) | 0.46 (1.08, 11)                             | 2.66 (1.2, 11.86)  | 0.38 (0.14, 0.9)                            | 2.21 (0.67, 7.31)   | 0.46 (7.19, 8.1)                            | 1.88 (0.8, 5.86)   | 0.53 (0.35, 0.71)                           |                   |
| Black or Black British                                                                                                                                                                                                                                                                                   | 40.4 (0.09, 781.43)    | 0.34 (269.46, 270.15)                       | 0.87 (0.2, 3.81)    | 0.15 (5.97, 6.17)                           | 3.8 (0.2, 15.63)    | 0.29 (1.94, 20.51)                          | 1.46 (0.44, 4.88)     | 0.31 (1.7, 9.18)                            | 1.28 (0.58, 4.34)  | 0.3 (4.68, 7.87)                            | 2.49 (0.68, 8.78)  | 0.23 (7.73, 8.37)                           | 0.43 (0.12, 1.72)   | 0.25 (3.18, 4.4)                            | 0.64 (0.17, 2.39)  | 0.36 (0.18, 0.54)                           |                   |
| Chinese and Other                                                                                                                                                                                                                                                                                        | -                      | -                                           | 1.45 (0.38, 5.48)   | 0.21 (4.15, 8.37)                           | 0.73 (0.15, 3.51)   | 0.11 (7.49, 7.7)                            | 1.1 (0.3, 4.07)       | 0.26 (4.52, 7.05)                           | 1.66 (0.28, 3.99)  | 0.27 (5.92, 6.47)                           | 0.74 (0.18, 2.97)  | 0.17 (4.21, 4.35)                           | 0.46 (0.7, 17.05)   | 0.52 (4.18, 9.23)                           | 1.62 (0.34, 7.83)  | 0.5 (0.25, 0.75)                            |                   |
| Unclassified                                                                                                                                                                                                                                                                                             | -                      | -                                           | 1.44 (0.29, 7.23)   | 0.21 (4.1, 8.52)                            | 1.13 (0.2, 6.40)    | 0.14 (1.00, 10.31)                          | 0.66 (0.12, 3.77)     | 0.27 (4.47, 5.27)                           | 0.67 (0.12, 3.62)  | 0.21 (4.59, 5.01)                           | 1.2 (0.2, 7.22)    | 0.21 (5.55, 5.95)                           | 0.27 (0.02, 2.23)   | 0.19 (3.02, 3.41)                           | 0.24 (0.04, 0.44)  |                                             |                   |

| <i>The proportion of people who have received three or more prescriptions for an antipsychotic in the preceding 12 months, and who have a record of blood testing (fasting glucose, HbA1c, lipid profile, urea and electrolytes, full blood count, liver function tests), body mass index and blood pressure</i> |                                                                     |                                                                     |                                                                 |                      |
|------------------------------------------------------------------------------------------------------------------------------------------------------------------------------------------------------------------------------------------------------------------------------------------------------------------|---------------------------------------------------------------------|---------------------------------------------------------------------|-----------------------------------------------------------------|----------------------|
| <b>Indicator</b>                                                                                                                                                                                                                                                                                                 |                                                                     |                                                                     |                                                                 |                      |
| <b>Group: Mental health</b>                                                                                                                                                                                                                                                                                      |                                                                     |                                                                     |                                                                 |                      |
| <b>Variable</b>                                                                                                                                                                                                                                                                                                  | <b>Univariate</b>                                                   |                                                                     | <b>Multivariable</b>                                            |                      |
|                                                                                                                                                                                                                                                                                                                  | <b>Odds Ratio (OR) of achieving 4 of the 6 blood tests (95% CI)</b> | <b>Odds Ratio (OR) of achieving 4 of the 6 blood tests (95% CI)</b> | <b>Probability of achieving 4 of the 6 blood tests (95% CI)</b> |                      |
| <b>Year</b>                                                                                                                                                                                                                                                                                                      |                                                                     |                                                                     |                                                                 |                      |
| 2017/18 (comparator)                                                                                                                                                                                                                                                                                             | 1.0                                                                 | -                                                                   | 1.0                                                             | 0.31 (-9.66, 10.29)  |
| 2018/19                                                                                                                                                                                                                                                                                                          | 0.28                                                                | (0.19, 0.43)                                                        | 0.29 (0.17, 0.48)                                               | 0.15 (-4.51, 4.81)   |
| 2019/20                                                                                                                                                                                                                                                                                                          | 0.10                                                                | (0.06, 0.16)                                                        | 0.13 (0.07, 0.24)                                               | 0.08 (-2.57, 2.74)   |
| <b>Prison</b>                                                                                                                                                                                                                                                                                                    |                                                                     |                                                                     |                                                                 |                      |
| Prison 1                                                                                                                                                                                                                                                                                                         | 1.94                                                                | (0.52, 7.26)                                                        | 0.81 (0.13, 4.91)                                               | -                    |
| Prison 2                                                                                                                                                                                                                                                                                                         | 2.30                                                                | (0.87, 6.05)                                                        | 2.33 (0.76, 7.1)                                                | -                    |
| Prison 3                                                                                                                                                                                                                                                                                                         | 3.37                                                                | (1.32, 8.55)                                                        | 2.47 (0.78, 7.8)                                                | -                    |
| Prison 4                                                                                                                                                                                                                                                                                                         | 2.38                                                                | (0.85, 6.69)                                                        | 1.83 (0.54, 6.2)                                                | -                    |
| Prison 5                                                                                                                                                                                                                                                                                                         | 2.98                                                                | (0.26, 34.77)                                                       | 3.57 (0.24, 53.28)                                              | -                    |
| Prison 6                                                                                                                                                                                                                                                                                                         | 11.85                                                               | (3.05, 46.12)                                                       | 7.26 (1.41, 37.34)                                              | -                    |
| Prison 7                                                                                                                                                                                                                                                                                                         | 3.23                                                                | (1.22, 8.58)                                                        | 3.91 (1.19, 12.82)                                              | -                    |
| Prison 8                                                                                                                                                                                                                                                                                                         | 5.08                                                                | (1.98, 13.04)                                                       | 4.81 (1.58, 14.65)                                              | -                    |
| Prison 9                                                                                                                                                                                                                                                                                                         | 24.13                                                               | (9.77, 59.59)                                                       | 8.55 (2.59, 28.19)                                              | -                    |
| Prison 10                                                                                                                                                                                                                                                                                                        | 0.65                                                                | (0.13, 3.36)                                                        | 0.68 (0.11, 4.09)                                               | -                    |
| Prison 11 (comparator)                                                                                                                                                                                                                                                                                           | 1.0                                                                 | -                                                                   | 1.0                                                             | -                    |
| Prison 12                                                                                                                                                                                                                                                                                                        | -                                                                   | -                                                                   | -                                                               | -                    |
| Prison 13                                                                                                                                                                                                                                                                                                        | 13.40                                                               | (4.97, 36.12)                                                       | 4.53 (1.25, 16.37)                                              | -                    |
| <b>Prison category</b>                                                                                                                                                                                                                                                                                           |                                                                     |                                                                     |                                                                 |                      |
| A (comparator)                                                                                                                                                                                                                                                                                                   | 1.0                                                                 | -                                                                   | -                                                               | -                    |
| B                                                                                                                                                                                                                                                                                                                | 0.07                                                                | (0.04, 0.13)                                                        | -                                                               | -                    |
| C                                                                                                                                                                                                                                                                                                                | 0.14                                                                | (0.08, 0.24)                                                        | -                                                               | -                    |
| Closed                                                                                                                                                                                                                                                                                                           | 0.21                                                                | (0.12, 0.36)                                                        | -                                                               | -                    |
| D                                                                                                                                                                                                                                                                                                                | 0.45                                                                | (0.15, 1.32)                                                        | -                                                               | -                    |
| YOI                                                                                                                                                                                                                                                                                                              | -                                                                   | -                                                                   | -                                                               | -                    |
| <b>Gender</b>                                                                                                                                                                                                                                                                                                    |                                                                     |                                                                     |                                                                 |                      |
| Female (comparator)                                                                                                                                                                                                                                                                                              | 1.0                                                                 | -                                                                   | -                                                               | -                    |
| Male                                                                                                                                                                                                                                                                                                             | 0.83                                                                | (0.52, 1.32)                                                        | -                                                               | -                    |
| <b>Age - years</b>                                                                                                                                                                                                                                                                                               |                                                                     |                                                                     |                                                                 |                      |
| 10 - <20                                                                                                                                                                                                                                                                                                         | -                                                                   | -                                                                   | -                                                               | -                    |
| 20 - <30                                                                                                                                                                                                                                                                                                         | 0.60                                                                | (0.33, 1.09)                                                        | 0.6 (0.3, 1.18)                                                 | 0.13 (-3.87, 4.12)   |
| 30 - <40 (comparator)                                                                                                                                                                                                                                                                                            | 1.0                                                                 | -                                                                   | 1.0                                                             | 0.17 (-5.39, 5.74)   |
| 40 - <50                                                                                                                                                                                                                                                                                                         | 1.08                                                                | (0.68, 1.72)                                                        | 0.96 (0.55, 1.67)                                               | 0.17 (-5.25, 5.59)   |
| 50 - <60                                                                                                                                                                                                                                                                                                         | 2.24                                                                | (1.29, 3.88)                                                        | 1.41 (0.72, 2.75)                                               | 0.21 (-6.6, 7.03)    |
| 60 - <70                                                                                                                                                                                                                                                                                                         | 3.31                                                                | (1.28, 8.55)                                                        | 1.52 (0.46, 5.04)                                               | 0.22 (-6.89, 7.34)   |
| 70 - <80                                                                                                                                                                                                                                                                                                         | 1.74                                                                | (0.5, 6.1)                                                          | 1.12 (0.25, 5.04)                                               | 0.19 (-5.78, 6.15)   |
| 80 - <90                                                                                                                                                                                                                                                                                                         | -                                                                   | -                                                                   | -                                                               | -                    |
| 90 - <100                                                                                                                                                                                                                                                                                                        | -                                                                   | -                                                                   | -                                                               | -                    |
| 100 - <110                                                                                                                                                                                                                                                                                                       | -                                                                   | -                                                                   | -                                                               | -                    |
| <b>Length of Stay (months)</b>                                                                                                                                                                                                                                                                                   |                                                                     |                                                                     |                                                                 |                      |
| <1                                                                                                                                                                                                                                                                                                               | 0.72                                                                | (0.3, 1.73)                                                         | 1.15 (0.44, 3.01)                                               | 0.13 (-3.93, 4.18)   |
| 1-<6 (comparator)                                                                                                                                                                                                                                                                                                | 1.0                                                                 | -                                                                   | 1.0                                                             | 0.11 (-3.54, 3.77)   |
| 6-<12                                                                                                                                                                                                                                                                                                            | 1.73                                                                | (0.96, 3.11)                                                        | 1.44 (0.73, 2.87)                                               | 0.15 (-4.6, 4.9)     |
| 12-<24                                                                                                                                                                                                                                                                                                           | 2.23                                                                | (1.23, 4.03)                                                        | 1.98 (0.97, 4.03)                                               | 0.18 (-5.67, 6.04)   |
| 24+                                                                                                                                                                                                                                                                                                              | 6.85                                                                | (4.02, 11.67)                                                       | 3.48 (1.66, 7.31)                                               | 0.26 (-7.99, 8.51)   |
| <b>Ethnic Group</b>                                                                                                                                                                                                                                                                                              |                                                                     |                                                                     |                                                                 |                      |
| White (comparator)                                                                                                                                                                                                                                                                                               | 1.0                                                                 | -                                                                   | 1.0                                                             | 0.16 (-5.01, 5.34)   |
| Mixed                                                                                                                                                                                                                                                                                                            | 0.44                                                                | (0.05, 3.62)                                                        | 0.29 (0.03, 2.52)                                               | 0.07 (-2.13, 2.27)   |
| Asian or Asian British                                                                                                                                                                                                                                                                                           | 6.74                                                                | (2.49, 18.28)                                                       | 5.67 (1.84, 17.46)                                              | 0.4 (-12.37, 13.18)  |
| Black or Black British                                                                                                                                                                                                                                                                                           | 2.52                                                                | (0.85, 7.48)                                                        | 4.04 (1.12, 14.54)                                              | 0.35 (-10.68, 11.37) |
| Chinese and Other                                                                                                                                                                                                                                                                                                | 2.55                                                                | (0.76, 8.59)                                                        | 1.18 (0.3, 4.61)                                                | 0.18 (-5.56, 5.92)   |
| Unclassified                                                                                                                                                                                                                                                                                                     | 2.87                                                                | (0.74, 11.16)                                                       | 1.85 (0.35, 9.85)                                               | 0.23 (-7.2, 7.67)    |

Indicator *The proportion of the prison population prescribed three or more psychotropic drugs (antipsychotics, sedative anti-depressants, hypnotics and anxiolytics, pregabalin or gabapentin, opioids) at the same time during an eight-week period*

| Group: Mental health           |                                        |                |                                        |                |                 |               |                                    |                         |                 |               |                                    |                         |
|--------------------------------|----------------------------------------|----------------|----------------------------------------|----------------|-----------------|---------------|------------------------------------|-------------------------|-----------------|---------------|------------------------------------|-------------------------|
| Variable                       | Univariate                             |                |                                        |                | Multivariable   |               |                                    |                         |                 |               |                                    |                         |
|                                | 3 or more Drugs                        |                | 4 or more Drugs                        |                | 3 or more Drugs |               |                                    |                         | 4 or more Drugs |               |                                    |                         |
|                                | Odds Ratio (OR) of achieving indicator | (95% CI) of OR | Odds Ratio (OR) of achieving indicator | (95% CI) of OR | OR              | (95% CI)      | Probability of achieving indicator | (95% CI) of probability | OR              | (95% CI)      | Probability of achieving indicator | (95% CI) of probability |
| <b>Year</b>                    |                                        |                |                                        |                |                 |               |                                    |                         |                 |               |                                    |                         |
| 2017/18 (comparator)           | 1.0                                    | -              | 1.0                                    | -              | 1.0             | -             | 0.006                              | (-0.046, 0.058)         | 1.0             | -             | 0.002                              | (0.001, 0.003)          |
| 2018/19                        | 1.36                                   | (1.07, 1.73)   | 1.46                                   | (0.97, 2.19)   | 1.38            | (1.07, 1.79)  | 0.008                              | (-0.063, 0.079)         | 1.45            | (0.95, 2.2)   | 0.003                              | (0.002, 0.005)          |
| 2019/20                        | 1.60                                   | (1.27, 2)      | 2.22                                   | (1.54, 3.21)   | 1.76            | (1.37, 2.25)  | 0.011                              | (-0.079, 0.1)           | 2.30            | (1.56, 3.39)  | 0.005                              | (0.003, 0.008)          |
| <b>Prison</b>                  |                                        |                |                                        |                |                 |               |                                    |                         |                 |               |                                    |                         |
| Prison 1                       | 1.34                                   | (0.79, 2.3)    | 0.78                                   | (0.26, 2.32)   | 0.89            | (0.48, 1.64)  | 0.007                              | (-0.051, 0.064)         | 0.41            | (0.12, 1.47)  | 0.001                              | (-0.001, 0.004)         |
| Prison 2                       | 4.42                                   | (3.16, 6.19)   | 5.00                                   | (2.9, 8.63)    | 2.94            | (2.02, 4.3)   | 0.022                              | (-0.163, 0.206)         | 3.30            | (1.79, 6.1)   | 0.01                               | (-0.007, 0.028)         |
| Prison 3                       | 1.67                                   | (1.11, 2.51)   | 0.70                                   | (0.29, 1.68)   | 0.93            | (0.58, 1.49)  | 0.007                              | (-0.053, 0.067)         | 0.34            | (0.13, 0.91)  | 0.001                              | (-0.001, 0.003)         |
| Prison 4                       | 1.56                                   | (1.02, 2.4)    | 1.53                                   | (0.76, 3.11)   | 0.71            | (0.44, 1.17)  | 0.005                              | (-0.041, 0.052)         | 0.58            | (0.26, 1.31)  | 0.002                              | (-0.002, 0.005)         |
| Prison 5                       | 0.60                                   | (0.22, 1.67)   | -                                      | -              | 0.25            | (0.08, 0.83)  | 0.002                              | (-0.015, 0.018)         | -               | -             | -                                  | -                       |
| Prison 6                       | 0.75                                   | (0.4, 1.42)    | 0.17                                   | (0.02, 1.31)   | 0.27            | (0.12, 0.62)  | 0.002                              | (-0.016, 0.02)          | 0.10            | (0.01, 0.75)  | 0.0003                             | (-0.001, 0.001)         |
| Prison 7                       | 4.25                                   | (2.7, 6.69)    | 2.86                                   | (1.23, 6.64)   | 0.85            | (0.01, 74.82) | 0.006                              | (-0.052, 0.065)         | 0.48            | (0, 882.55)   | 0.001                              | (-0.007, 0.01)          |
| Prison 8                       | 8.11                                   | (5.71, 11.52)  | 15.06                                  | (8.84, 25.64)  | 1.37            | (0.02, 119.2) | 0.01                               | (-0.083, 0.104)         | 2.31            | (0.001, 4060) | 0.007                              | (-0.033, 0.047)         |
| Prison 9                       | 1.87                                   | (1.11, 3.17)   | 1.54                                   | (0.61, 3.92)   | 0.85            | (0.46, 1.6)   | 0.006                              | (-0.049, 0.062)         | 0.62            | (0.22, 1.76)  | 0.002                              | (-0.002, 0.006)         |
| Prison 10                      | 0.60                                   | (0.35, 1.03)   | 1.21                                   | (0.6, 2.46)    | 0.52            | (0.29, 0.92)  | 0.004                              | (-0.03, 0.038)          | 1.10            | (0.52, 2.36)  | 0.003                              | (-0.003, 0.01)          |
| Prison 11 (comparator)         | 1.0                                    | -              | 1.0                                    | -              | 1.0             | -             | 0.008                              | (-0.057, 0.072)         | 1.0             | -             | 0.003                              | (-0.003, 0.009)         |
| Prison 12                      | -                                      | -              | -                                      | -              | -               | -             | -                                  | -                       | -               | -             | -                                  | -                       |
| Prison 13                      | 2.19                                   | (1.24, 3.88)   | 1.88                                   | (0.69, 5.11)   | 0.97            | (0.46, 2.01)  | 0.007                              | (-0.055, 0.07)          | 0.50            | (0.13, 1.89)  | 0.002                              | (-0.002, 0.005)         |
| <b>Prison category</b>         |                                        |                |                                        |                |                 |               |                                    |                         |                 |               |                                    |                         |
| A (comparator)                 | 1.0                                    | -              | 1.0                                    | -              | -               | -             | -                                  | -                       | -               | -             | -                                  | -                       |
| B                              | 0.92                                   | (0.65, 1.32)   | 1.30                                   | (0.69, 2.43)   | -               | -             | -                                  | -                       | -               | -             | -                                  | -                       |
| C                              | 0.78                                   | (0.53, 1.14)   | 0.61                                   | (0.3, 1.25)    | -               | -             | -                                  | -                       | -               | -             | -                                  | -                       |
| Closed                         | 3.33                                   | (2.3, 4.82)    | 6.22                                   | (3.3, 11.72)   | -               | -             | -                                  | -                       | -               | -             | -                                  | -                       |
| D                              | 0.35                                   | (0.2, 0.64)    | 0.07                                   | (0.01, 0.57)   | -               | -             | -                                  | -                       | -               | -             | -                                  | -                       |
| YOI                            | -                                      | -              | -                                      | -              | -               | -             | -                                  | -                       | -               | -             | -                                  | -                       |
| <b>Gender</b>                  |                                        |                |                                        |                |                 |               |                                    |                         |                 |               |                                    |                         |
| Female (comparator)            | 1.0                                    | -              | 1.0                                    | -              | 1.0             | -             | 0.023                              | (-0.189, 0.235)         | 1.0             | -             | 0.009                              | (-0.049, 0.068)         |
| Male                           | 0.21                                   | (0.17, 0.26)   | 0.12                                   | (0.09, 0.16)   | 0.29            | (0, 24.78)    | 0.007                              | (-0.051, 0.064)         | 0.29            | (0, 492.45)   | 0.003                              | (0, 0.006)              |
| <b>Age - years</b>             |                                        |                |                                        |                |                 |               |                                    |                         |                 |               |                                    |                         |
| 10 - <20                       | -                                      | -              | -                                      | -              | -               | -             | -                                  | -                       | -               | -             | -                                  | -                       |
| 20 - <30                       | 0.40                                   | (0.3, 0.52)    | 0.41                                   | (0.27, 0.62)   | 0.51            | (0.38, 0.69)  | 0.005                              | (-0.035, 0.044)         | 0.56            | (0.36, 0.87)  | 0.002                              | (0.001, 0.003)          |
| 30 - <40 (comparator)          | 1.0                                    | -              | 1.0                                    | -              | 1.0             | -             | 0.009                              | (-0.068, 0.086)         | 1.0             | -             | 0.004                              | (0.002, 0.006)          |
| 40 - <50                       | 1.31                                   | (1.05, 1.62)   | 1.47                                   | (1.06, 2.03)   | 1.26            | (0.99, 1.59)  | 0.011                              | (-0.085, 0.107)         | 1.41            | (0.99, 2)     | 0.006                              | (0.003, 0.008)          |
| 50 - <60                       | 1.15                                   | (0.86, 1.54)   | 0.71                                   | (0.41, 1.23)   | 1.07            | (0.78, 1.48)  | 0.01                               | (-0.072, 0.092)         | 0.67            | (0.38, 1.21)  | 0.003                              | (0.001, 0.004)          |
| 60 - <70                       | 0.80                                   | (0.46, 1.38)   | 0.70                                   | (0.28, 1.72)   | 0.78            | (0.42, 1.45)  | 0.007                              | (-0.053, 0.067)         | 0.87            | (0.35, 2.2)   | 0.003                              | (0.0002, 0.007)         |
| 70 - <80                       | 0.74                                   | (0.27, 1.99)   | 0.90                                   | (0.22, 3.66)   | 0.88            | (0.32, 2.41)  | 0.008                              | (-0.0603, 0.076)        | 1.09            | (0.26, 4.54)  | 0.004                              | (-0.002, 0.01)          |
| 80 - <90                       | 0.87                                   | (0.12, 6.27)   | -                                      | -              | 0.74            | (0.1, 5.38)   | 0.007                              | (-0.052, 0.065)         | -               | -             | -                                  | -                       |
| 90 - <100                      | -                                      | -              | -                                      | -              | -               | -             | -                                  | -                       | -               | -             | -                                  | -                       |
| 100 - <110                     | -                                      | -              | -                                      | -              | -               | -             | -                                  | -                       | -               | -             | -                                  | -                       |
| <b>Length of Stay (months)</b> |                                        |                |                                        |                |                 |               |                                    |                         |                 |               |                                    |                         |
| <1                             | 0.46                                   | (0.33, 0.64)   | 0.42                                   | (0.24, 0.71)   | 0.43            | (0.31, 0.62)  | 0.003                              | (-0.025, 0.031)         | 0.38            | (0.21, 0.67)  | 0.001                              | (0.0004, 0.002)         |
| 1-<6 (comparator)              | 1.0                                    | -              | 1.0                                    | -              | 1.0             | -             | 0.007                              | (-0.056, 0.071)         | 1.0             | -             | 0.003                              | (0.002, 0.004)          |
| 6-<12                          | 1.35                                   | (1.07, 1.72)   | 1.52                                   | (1.06, 2.19)   | 1.64            | (1.26, 2.14)  | 0.012                              | (-0.091, 0.115)         | 2.19            | (1.48, 3.24)  | 0.006                              | (0.004, 0.009)          |
| 12-<24                         | 1.63                                   | (1.28, 2.07)   | 1.61                                   | (1.1, 2.37)    | 2.16            | (1.64, 2.85)  | 0.016                              | (-0.119, 0.151)         | 2.82            | (1.84, 4.32)  | 0.008                              | (0.004, 0.012)          |
| 24+                            | 1.08                                   | (0.78, 1.48)   | 1.15                                   | (0.7, 1.89)    | 1.22            | (0.83, 1.8)   | 0.009                              | (-0.068, 0.086)         | 1.92            | (1.07, 3.42)  | 0.006                              | (0.002, 0.009)          |
| <b>Ethnic Group</b>            |                                        |                |                                        |                |                 |               |                                    |                         |                 |               |                                    |                         |
| White (comparator)             | 1.0                                    | -              | 1.0                                    | -              | 1.0             | -             | 0.009                              | (-0.066, 0.084)         | 1.0             | -             | 0.004                              | (0.002, 0.005)          |
| Mixed                          | 0.38                                   | (0.14, 1.02)   | 0.46                                   | (0.11, 1.85)   | 0.40            | (0.15, 1.07)  | 0.004                              | (-0.027, 0.034)         | 0.44            | (0.11, 1.78)  | 0.002                              | (-0.001, 0.004)         |
| Asian or Asian British         | 0.15                                   | (0.05, 0.47)   | 0.12                                   | (0.02, 0.87)   | 0.22            | (0.07, 0.69)  | 0.002                              | (-0.015, 0.019)         | 0.18            | (0.03, 1.29)  | 0.001                              | (-0.001, 0.002)         |
| Black or Black British         | 0.47                                   | (0.19, 1.13)   | -                                      | -              | 0.40            | (0.15, 1.07)  | 0.004                              | (-0.027, 0.034)         | -               | -             | -                                  | -                       |
| Chinese and Other              | 0.65                                   | (0.21, 2.03)   | 1.59                                   | (0.5, 4.98)    | 0.57            | (0.18, 1.78)  | 0.005                              | (-0.038, 0.048)         | 1.29            | (0.41, 4.08)  | 0.005                              | (-0.001, 0.011)         |
| Unclassified                   | 0.49                                   | (0.2, 1.18)    | 0.71                                   | (0.23, 2.22)   | 0.72            | (0.29, 1.79)  | 0.006                              | (-0.049, 0.061)         | 1.41            | (0.43, 4.61)  | 0.005                              | (-0.001, 0.012)         |



The proportion of people aged over 55 years in the prison population who have a record of one of the following assessments in the preceding 12 months; Mini Mental State Examination, 6 item Cognitive Impairment Test, General practitioner Assessment of Cognition

| Indicator                      | Univariate             |                                        | Multivariable   |        |                 |                                    |                         |
|--------------------------------|------------------------|----------------------------------------|-----------------|--------|-----------------|------------------------------------|-------------------------|
|                                | Variable               | Odds Ratio (OR) of achieving indicator | (95% CI) of OR  | OR     | (95% CI)        | Probability of achieving indicator | (95% CI) of probability |
| <b>Group: Mental health</b>    |                        |                                        |                 |        |                 |                                    |                         |
| <b>Year</b>                    |                        |                                        |                 |        |                 |                                    |                         |
|                                | 2017/18 (comparator)   | 1.0                                    | -               | 1.0    | -               | 0.01                               | (0.01, 0.02)            |
|                                | 2018/19                | 5.84                                   | (3.72, 9.15)    | 8.51   | (5.29, 13.72)   | 0.09                               | (0.08, 0.1)             |
|                                | 2019/20                | 18.31                                  | (11.95, 28.05)  | 40.47  | (25.34, 64.64)  | 0.23                               | (0.22, 0.25)            |
| <b>Prison</b>                  |                        |                                        |                 |        |                 |                                    |                         |
|                                | Prison 1               | 85.17                                  | (24.74, 293.23) | 34.95  | (9.78, 124.91)  | -                                  | -                       |
|                                | Prison 2               | 232.22                                 | (72.98, 738.93) | 109.76 | (34.23, 351.92) | -                                  | -                       |
|                                | Prison 3               | 1.12                                   | (0.19, 6.74)    | 0.65   | (0.11, 3.97)    | -                                  | -                       |
|                                | Prison 4               | 2.19                                   | (0.54, 8.81)    | 0.86   | (0.2, 3.74)     | -                                  | -                       |
|                                | Prison 5               | 1.71                                   | (0.18, 16.61)   | 0.87   | (0.09, 8.63)    | -                                  | -                       |
|                                | Prison 6               | 111.62                                 | (34.51, 360.98) | 44.33  | (13.3, 147.78)  | -                                  | -                       |
|                                | Prison 7               | 1.70                                   | (0.17, 16.58)   | -      | -               | -                                  | -                       |
|                                | Prison 8               | 37.88                                  | (11.24, 127.67) | 17.79  | (5.16, 61.39)   | -                                  | -                       |
|                                | Prison 9               | 9.09                                   | (2.71, 30.52)   | 3.30   | (0.92, 11.88)   | -                                  | -                       |
|                                | Prison 10              | 142.14                                 | (44.7, 451.95)  | 70.34  | (21.83, 226.7)  | -                                  | -                       |
|                                | Prison 11 (comparator) | 1.0                                    | -               | 1.0    | -               | -                                  | -                       |
|                                | Prison 12              | -                                      | -               | -      | -               | -                                  | -                       |
|                                | Prison 13              | 7.24                                   | (1.97, 26.61)   | 2.30   | (0.55, 9.63)    | -                                  | -                       |
| <b>Prison category</b>         |                        |                                        |                 |        |                 |                                    |                         |
|                                | A (comparator)         | 1.0                                    | -               | -      | -               | -                                  | -                       |
|                                | B                      | 8.41                                   | (5.79, 12.2)    | -      | -               | -                                  | -                       |
|                                | C                      | 0.81                                   | (0.5, 1.34)     | -      | -               | -                                  | -                       |
|                                | Closed                 | 2.52                                   | (1.48, 4.3)     | -      | -               | -                                  | -                       |
|                                | D                      | 6.87                                   | (4.44, 10.64)   | -      | -               | -                                  | -                       |
|                                | YOI                    | -                                      | -               | -      | -               | -                                  | -                       |
| <b>Gender</b>                  |                        |                                        |                 |        |                 |                                    |                         |
|                                | Female (comparator)    | 1.0                                    | -               | -      | -               | -                                  | -                       |
|                                | Male                   | 1.04                                   | (0.68, 1.59)    | -      | -               | -                                  | -                       |
| <b>Age - years</b>             |                        |                                        |                 |        |                 |                                    |                         |
|                                | 10 - <20               | -                                      | -               | -      | -               | -                                  | -                       |
|                                | 20 - <30               | -                                      | -               | -      | -               | -                                  | -                       |
|                                | 30 - <40               | -                                      | -               | -      | -               | -                                  | -                       |
|                                | 40 - <50               | -                                      | -               | -      | -               | -                                  | -                       |
|                                | 50 - <60 (comparator)  | 1.0                                    | -               | 1.0    | -               | 0.10                               | (0.09, 0.11)            |
|                                | 60 - <70               | 0.90                                   | (0.73, 1.11)    | 1.30   | (0.99, 1.71)    | 0.11                               | (0.1, 0.13)             |
|                                | 70 - <80               | 0.99                                   | (0.74, 1.33)    | 1.60   | (1.07, 2.41)    | 0.13                               | (0.1, 0.15)             |
|                                | 80 - <90               | 1.20                                   | (0.7, 2.08)     | 0.99   | (0.49, 1.98)    | 0.10                               | (0.06, 0.14)            |
|                                | 90 - <100              | 4.58                                   | (0.76, 27.58)   | 6.53   | (0.39, 108.71)  | 0.24                               | (-0.03, 0.51)           |
|                                | 100 - <110             | -                                      | -               | -      | -               | -                                  | -                       |
| <b>Length of Stay (months)</b> |                        |                                        |                 |        |                 |                                    |                         |
|                                | <1                     | 0.60                                   | (0.45, 0.79)    | 0.65   | (0.45, 0.94)    | 0.08                               | (0.07, 0.1)             |
|                                | 1-<6 (comparator)      | 1.0                                    | -               | 1.0    | -               | 0.11                               | (0.09, 0.12)            |
|                                | 6-<12                  | 0.89                                   | (0.67, 1.17)    | 1.29   | (0.89, 1.86)    | 0.12                               | (0.1, 0.14)             |
|                                | 12-<24                 | 0.70                                   | (0.53, 0.92)    | 1.32   | (0.89, 1.97)    | 0.12                               | (0.1, 0.14)             |
|                                | 24+                    | 0.22                                   | (0.16, 0.3)     | 1.09   | (0.67, 1.77)    | 0.11                               | (0.09, 0.14)            |
| <b>Ethnic Group</b>            |                        |                                        |                 |        |                 |                                    |                         |
|                                | White (comparator)     | 1.0                                    | -               | 1.0    | -               | 0.11                               | (0.1, 0.12)             |
|                                | Mixed                  | 1.05                                   | (0.49, 2.29)    | 1.11   | (0.43, 2.88)    | 0.11                               | (0.05, 0.17)            |
|                                | Asian or Asian British | 1.57                                   | (0.76, 3.21)    | 1.07   | (0.46, 2.53)    | 0.11                               | (0.06, 0.17)            |
|                                | Black or Black British | 1.12                                   | (0.56, 2.26)    | 0.89   | (0.39, 2.03)    | 0.10                               | (0.05, 0.15)            |
|                                | Chinese and Other      | -                                      | -               | -      | -               | -                                  | -                       |
|                                | Unclassified           | 0.22                                   | (0.05, 0.91)    | 0.68   | (0.15, 3.2)     | 0.09                               | (0.003, 0.17)           |

| Indicator                      | <i>The proportion of new receptions to prison accepting opt out dry blood spot testing</i> |                |               |                  |                                    |                         |  |
|--------------------------------|--------------------------------------------------------------------------------------------|----------------|---------------|------------------|------------------------------------|-------------------------|--|
|                                | Group: Communicable Disease                                                                |                |               |                  |                                    |                         |  |
| Variable                       | Univariate                                                                                 |                | Multivariable |                  |                                    |                         |  |
|                                | Odds Ratio (OR) of achieving indicator                                                     | (95% CI) of OR | OR            | (95% CI)         | Probability of achieving indicator | (95% CI) of probability |  |
| <b>Year</b>                    |                                                                                            |                |               |                  |                                    |                         |  |
| 2017/18 (comparator)           | 1.0                                                                                        | -              | 1.0           | -                | 0.01                               | (-0.01, 0.03)           |  |
| 2018/19                        | 38.99                                                                                      | (32.95, 46.12) | 75.98         | (61.25, 94.25)   | 0.33                               | (-0.3, 0.96)            |  |
| 2019/20                        | 72.48                                                                                      | (61.31, 85.69) | 212.13        | (170.37, 264.13) | 0.51                               | (-0.46, 1.48)           |  |
| <b>Prison</b>                  |                                                                                            |                |               |                  |                                    |                         |  |
| Prison 1                       | 10.77                                                                                      | (9.47, 12.25)  | 8.45          | (7.03, 10.14)    | 0.47                               | (-0.42, 1.37)           |  |
| Prison 2                       | 5.86                                                                                       | (5.33, 6.45)   | 5.45          | (4.84, 6.14)     | 0.42                               | (-0.37, 1.21)           |  |
| Prison 3                       | 1.36                                                                                       | (1.22, 1.51)   | 0.97          | (0.83, 1.12)     | 0.18                               | (-0.16, 0.52)           |  |
| Prison 4                       | 2.61                                                                                       | (2.35, 2.9)    | 1.45          | (1.25, 1.68)     | 0.23                               | (-0.21, 0.67)           |  |
| Prison 5                       | 3.19                                                                                       | (2.71, 3.74)   | 1.44          | (1.13, 1.84)     | 0.23                               | (-0.21, 0.67)           |  |
| Prison 6                       | 2.75                                                                                       | (2.45, 3.08)   | 1.84          | (1.57, 2.16)     | 0.26                               | (-0.24, 0.77)           |  |
| Prison 7                       | 5.04                                                                                       | (4.27, 5.94)   | 3.00          | (0.27, 33.3)     | 0.33                               | (-0.37, 1.04)           |  |
| Prison 8                       | 10.62                                                                                      | (9.23, 12.21)  | 4.53          | (0.41, 50.69)    | 0.39                               | (-0.41, 1.2)            |  |
| Prison 9                       | 1.90                                                                                       | (1.54, 2.35)   | 1.34          | (1.04, 1.71)     | 0.22                               | (-0.2, 0.64)            |  |
| Prison 10                      | 0.06                                                                                       | (0.04, 0.07)   | 0.05          | (0.04, 0.07)     | 0.01                               | (-0.01, 0.04)           |  |
| Prison 11 (comparator)         | 1.0                                                                                        | -              | 1.0           | -                | 0.18                               | (-0.17, 0.53)           |  |
| Prison 12                      | 3.79                                                                                       | (3.23, 4.45)   | 2.10          | (1.64, 2.7)      | 0.28                               | (-0.26, 0.82)           |  |
| Prison 13                      | 0.22                                                                                       | (0.15, 0.33)   | 0.14          | (0.09, 0.22)     | 0.04                               | (-0.04, 0.11)           |  |
| <b>Prison category</b>         |                                                                                            |                |               |                  |                                    |                         |  |
| A (comparator)                 | 1.0                                                                                        | -              |               |                  |                                    |                         |  |
| B                              | 1.31                                                                                       | (1.1, 1.55)    |               |                  |                                    |                         |  |
| C                              | 2.95                                                                                       | (2.48, 3.51)   |               |                  |                                    |                         |  |
| Closed                         | 8.09                                                                                       | (6.68, 9.79)   |               |                  |                                    |                         |  |
| D                              | 2.94                                                                                       | (2.45, 3.54)   |               |                  |                                    |                         |  |
| YOI                            | 3.87                                                                                       | (3.1, 4.83)    |               |                  |                                    |                         |  |
| <b>Gender</b>                  |                                                                                            |                |               |                  |                                    |                         |  |
| Female (comparator)            | 1.0                                                                                        | -              | 1.0           | -                | 0.31                               | (-0.33, 0.95)           |  |
| Male                           | 0.20                                                                                       | (0.18, 0.23)   | 0.5           | (0.05, 5.77)     | 0.24                               | (-0.22, 0.69)           |  |
| <b>Age - years</b>             |                                                                                            |                |               |                  |                                    |                         |  |
| 10 - <20                       | 0.87                                                                                       | (0.73, 1.03)   | 1.31          | (0.96, 1.78)     | 0.28                               | (-0.25, 0.8)            |  |
| 20 - <30                       | 1.03                                                                                       | (0.96, 1.09)   | 1.04          | (0.95, 1.14)     | 0.25                               | (-0.23, 0.73)           |  |
| 30 - <40 (comparator)          | 1.0                                                                                        | -              | 1.0           | -                | 0.25                               | (-0.22, 0.71)           |  |
| 40 - <50                       | 1.03                                                                                       | (0.96, 1.11)   | 0.95          | (0.86, 1.06)     | 0.24                               | (-0.22, 0.7)            |  |
| 50 - <60                       | 0.96                                                                                       | (0.86, 1.06)   | 0.90          | (0.78, 1.04)     | 0.24                               | (-0.21, 0.68)           |  |
| 60 - <70                       | 0.81                                                                                       | (0.68, 0.97)   | 1.03          | (0.8, 1.32)      | 0.25                               | (-0.22, 0.72)           |  |
| 70 - <80                       | 0.73                                                                                       | (0.53, 1.01)   | 0.82          | (0.52, 1.29)     | 0.23                               | (-0.2, 0.66)            |  |
| 80 - <90                       | 0.83                                                                                       | (0.41, 1.69)   | 0.84          | (0.31, 2.25)     | 0.23                               | (-0.22, 0.67)           |  |
| 90 - <100                      | 2.18                                                                                       | (0.15, 32.8)   | 1.84          | (0.07, 50.53)    | 0.31                               | (-0.38, 1.01)           |  |
| 100 - <110                     | -                                                                                          | -              | -             | -                | -                                  | -                       |  |
| <b>Length of Stay (months)</b> |                                                                                            |                |               |                  |                                    |                         |  |
| <1                             | 0.50                                                                                       | (0.47, 0.54)   | 0.53          | (0.48, 0.58)     | 0.19                               | (-0.17, 0.55)           |  |
| 1-<6 (comparator)              | 1.0                                                                                        | -              | 1.0           | -                | 0.26                               | (-0.23, 0.74)           |  |
| 6-<12                          | 1.36                                                                                       | (1.26, 1.47)   | 1.36          | (1.22, 1.51)     | 0.29                               | (-0.26, 0.83)           |  |
| 12-<24                         | 1.22                                                                                       | (1.1, 1.35)    | 1.30          | (1.14, 1.5)      | 0.28                               | (-0.25, 0.82)           |  |
| 24+                            | 6.78                                                                                       | (4.61, 9.96)   | 10.15         | (6.73, 15.31)    | 0.49                               | (-0.44, 1.42)           |  |
| <b>Ethnic Group</b>            |                                                                                            |                |               |                  |                                    |                         |  |
| White (comparator)             | 1.0                                                                                        | -              | 1.0           | -                | 0.25                               | (-0.22, 0.72)           |  |
| Mixed                          | 1.16                                                                                       | (0.95, 1.43)   | 0.85          | (0.66, 1.08)     | 0.23                               | (-0.21, 0.66)           |  |
| Asian or Asian British         | 0.91                                                                                       | (0.78, 1.07)   | 1.10          | (0.9, 1.33)      | 0.26                               | (-0.23, 0.74)           |  |
| Black or Black British         | 1.21                                                                                       | (0.99, 1.48)   | 0.94          | (0.75, 1.2)      | 0.24                               | (-0.22, 0.7)            |  |
| Chinese and Other              | 0.92                                                                                       | (0.68, 1.25)   | 0.76          | (0.53, 1.09)     | 0.22                               | (-0.2, 0.63)            |  |
| Unclassified                   | 0.71                                                                                       | (0.57, 0.89)   | 1.06          | (0.81, 1.38)     | 0.25                               | (-0.23, 0.74)           |  |

| Indicator                      | <i>The proportion of the prison population who have received one, two, three or four (course of three plus booster) Hepatitis B vaccinations in the preceding 12 months</i> |              |                   |               |                        |               |                             |              |   |
|--------------------------------|-----------------------------------------------------------------------------------------------------------------------------------------------------------------------------|--------------|-------------------|---------------|------------------------|---------------|-----------------------------|--------------|---|
| Group: Communicable Disease    |                                                                                                                                                                             |              |                   |               |                        |               |                             |              |   |
| Variable                       | Univariate                                                                                                                                                                  |              |                   |               |                        |               |                             |              |   |
|                                | Hepatitis B vaccines of the population who entered in the last 12 months - Odds Ratio (OR) of achieving indicator (95% CI)                                                  |              |                   |               |                        |               |                             |              |   |
|                                | 1st Hep B                                                                                                                                                                   |              | 1st and 2nd Hep B |               | 1st, 2nd and 3rd Hep B |               | 1st, 2nd, 3rd and 4th Hep B |              |   |
| <b>Year</b>                    |                                                                                                                                                                             |              |                   |               |                        |               |                             |              |   |
| 2017/18 (comparator)           | 1.0                                                                                                                                                                         | (0.85, 0.93) | 1.0               | -             | 1.0                    | -             | 1.0                         | -            | - |
| 2018/19                        | 0.89                                                                                                                                                                        | (1.89, 2.07) | 0.99              | (0.93, 1.04)  | 0.42                   | (0.39, 0.46)  | 1.40                        | (1.28, 1.53) |   |
| 2019/20                        | 1.98                                                                                                                                                                        | (0.41, 0.44) | 2.08              | (1.98, 2.19)  | 2.12                   | (2.01, 2.24)  | 2.27                        | (2.09, 2.46) |   |
| <b>Prison</b>                  |                                                                                                                                                                             |              |                   |               |                        |               |                             |              |   |
| Prison 1                       | 1.58                                                                                                                                                                        | (1.44, 1.73) | 1.88              | (1.71, 2.07)  | 2.30                   | (2.06, 2.56)  | 1.78                        | (1.54, 2.05) |   |
| Prison 2                       | 0.81                                                                                                                                                                        | (0.76, 0.87) | 0.88              | (0.81, 0.95)  | 0.91                   | (0.83, 0.99)  | 0.76                        | (0.67, 0.87) |   |
| Prison 3                       | 1.43                                                                                                                                                                        | (1.33, 1.54) | 1.59              | (1.47, 1.72)  | 1.79                   | (1.64, 1.96)  | 1.95                        | (1.75, 2.18) |   |
| Prison 4                       | 2.09                                                                                                                                                                        | (1.93, 2.25) | 2.37              | (2.19, 2.57)  | 2.58                   | (2.35, 2.83)  | 2.17                        | (1.93, 2.44) |   |
| Prison 5                       | 1.86                                                                                                                                                                        | (1.64, 2.12) | 2.21              | (1.93, 2.52)  | 2.54                   | (2.19, 2.95)  | 1.71                        | (1.4, 2.1)   |   |
| Prison 6                       | 2.07                                                                                                                                                                        | (1.9, 2.25)  | 2.50              | (2.29, 2.74)  | 2.54                   | (2.29, 2.82)  | 1.68                        | (1.46, 1.94) |   |
| Prison 7                       | 4.54                                                                                                                                                                        | (4.05, 5.1)  | 4.48              | (4, 5.03)     | 4.65                   | (4.11, 5.27)  | 3.36                        | (2.89, 3.9)  |   |
| Prison 8                       | 1.77                                                                                                                                                                        | (1.62, 1.94) | 1.78              | (1.62, 1.95)  | 1.66                   | (1.49, 1.86)  | 1.24                        | (1.06, 1.45) |   |
| Prison 9                       | 1.90                                                                                                                                                                        | (1.63, 2.22) | 2.12              | (1.81, 2.49)  | 2.63                   | (2.2, 3.13)   | 2.69                        | (2.18, 3.31) |   |
| Prison 10                      | 1.41                                                                                                                                                                        | (1.32, 1.51) | 1.36              | (1.26, 1.46)  | 1.49                   | (1.37, 1.62)  | 1.06                        | (0.95, 1.2)  |   |
| Prison 11 (comparator)         | 1.0                                                                                                                                                                         | -            | 1.0               | -             | 1.0                    | -             | 1.0                         | -            | - |
| Prison 12                      | 2.74                                                                                                                                                                        | (2.43, 3.08) | 3.39              | (3.01, 3.82)  | 2.99                   | (2.61, 3.42)  | 1.14                        | (0.91, 1.42) |   |
| Prison 13                      | 1.42                                                                                                                                                                        | (1.19, 1.7)  | 1.57              | (1.3, 1.89)   | 1.62                   | (1.31, 2.01)  | 1.40                        | (1.05, 1.86) |   |
| <b>Prison category</b>         |                                                                                                                                                                             |              |                   |               |                        |               |                             |              |   |
| A (comparator)                 | 1.0                                                                                                                                                                         | -            | 1.0               | -             | 1.0                    | -             | 1.0                         | -            | - |
| B                              | 0.63                                                                                                                                                                        | (0.56, 0.7)  | 0.57              | (0.5, 0.64)   | 0.51                   | (0.45, 0.59)  | 0.46                        | (0.39, 0.54) |   |
| C                              | 0.99                                                                                                                                                                        | (0.88, 1.11) | 1.02              | (0.9, 1.15)   | 1.00                   | (0.88, 1.15)  | 0.95                        | (0.8, 1.13)  |   |
| Closed                         | 1.47                                                                                                                                                                        | (1.29, 1.67) | 1.34              | (1.18, 1.53)  | 1.17                   | (1.01, 1.35)  | 0.92                        | (0.77, 1.11) |   |
| D                              | 1.20                                                                                                                                                                        | (1.05, 1.36) | 1.30              | (1.14, 1.48)  | 1.19                   | (1.02, 1.38)  | 0.81                        | (0.67, 0.98) |   |
| YOI                            | 1.63                                                                                                                                                                        | (1.4, 1.91)  | 1.82              | (1.55, 2.14)  | 1.39                   | (1.16, 1.67)  | 0.54                        | (0.42, 0.71) |   |
| <b>Gender</b>                  |                                                                                                                                                                             |              |                   |               |                        |               |                             |              |   |
| Female (comparator)            | 1.0                                                                                                                                                                         | -            | -                 | -             | -                      | -             | -                           | -            | - |
| Male                           | 0.61                                                                                                                                                                        | (0.57, 0.66) | 0.7               | (0.62, 0.72)  | 0.7                    | (0.68, 0.81)  | 0.8                         | (0.71, 0.89) |   |
| <b>Age - years</b>             |                                                                                                                                                                             |              |                   |               |                        |               |                             |              |   |
| 10 - <20                       | 0.91                                                                                                                                                                        | (0.8, 1.04)  | 1.0               | (0.83, 1.1)   | 0.9                    | (0.72, 1)     | 0.3                         | (0.22, 0.44) |   |
| 20 - <30                       | 0.98                                                                                                                                                                        | (0.94, 1.03) | 1.0               | (0.96, 1.06)  | 1.0                    | (0.93, 1.04)  | 0.9                         | (0.87, 1)    |   |
| 30 - <40 (comparator)          | 1.0                                                                                                                                                                         | -            | 1.0               | -             | 1.0                    | -             | 1.0                         | -            | - |
| 40 - <50                       | 0.96                                                                                                                                                                        | (0.9, 1.01)  | 1.0               | (0.9, 1.02)   | 1.0                    | (0.91, 1.04)  | 0.9                         | (0.86, 1.03) |   |
| 50 - <60                       | 0.91                                                                                                                                                                        | (0.84, 0.98) | 0.9               | (0.86, 1.01)  | 1.0                    | (0.87, 1.05)  | 0.8                         | (0.71, 0.93) |   |
| 60 - <70                       | 0.78                                                                                                                                                                        | (0.68, 0.89) | 0.8               | (0.68, 0.92)  | 0.8                    | (0.65, 0.92)  | 0.5                         | (0.38, 0.66) |   |
| 70 - <80                       | 0.62                                                                                                                                                                        | (0.47, 0.82) | 0.6               | (0.46, 0.83)  | 0.7                    | (0.52, 1.01)  | 0.5                         | (0.32, 0.9)  |   |
| 80 - <90                       | 0.49                                                                                                                                                                        | (0.27, 0.88) | 0.5               | (0.25, 0.92)  | 0.5                    | (0.24, 1.09)  | 0.8                         | (0.3, 1.87)  |   |
| 90 - <100                      | 0.80                                                                                                                                                                        | (0.08, 7.72) | 1.2               | (0.12, 11.13) | 2.3                    | (0.23, 23.28) | -                           | -            |   |
| 100 - <110                     | -                                                                                                                                                                           | -            | -                 | -             | -                      | -             | -                           | -            | - |
| <b>Length of Stay (months)</b> |                                                                                                                                                                             |              |                   |               |                        |               |                             |              |   |
| <1                             | 0.62                                                                                                                                                                        | (0.59, 0.65) | 0.6               | (0.53, 0.59)  | 0.5                    | (0.49, 0.55)  | 0.7                         | (0.64, 0.75) |   |
| 1-6 (comparator)               | 1.0                                                                                                                                                                         | -            | 1.0               | -             | 1.0                    | -             | 1.0                         | -            | - |
| 6-<12                          | 1.26                                                                                                                                                                        | (1.19, 1.33) | 1.4               | (1.28, 1.44)  | 1.4                    | (1.34, 1.53)  | 1.4                         | (1.24, 1.49) |   |
| 12-<24                         | 1.97                                                                                                                                                                        | (1.82, 2.12) | 2.2               | (2.04, 2.39)  | 2.2                    | (1.98, 2.4)   | 2.6                         | (2.29, 2.87) |   |
| 24+                            | 2.03                                                                                                                                                                        | (1.75, 2.36) | 2.2               | (1.89, 2.58)  | 2.4                    | (2.01, 2.78)  | 3.1                         | (2.45, 3.84) |   |
| <b>Ethnic Group</b>            |                                                                                                                                                                             |              |                   |               |                        |               |                             |              |   |
| White (comparator)             | 1.0                                                                                                                                                                         | -            | 1.0               | -             | 1.0                    | -             | 1.0                         | -            | - |
| Mixed                          | 0.93                                                                                                                                                                        | (0.8, 1.09)  | 0.9               | (0.77, 1.07)  | 0.8                    | (0.7, 1.02)   | 0.9                         | (0.7, 1.13)  |   |
| Asian or Asian British         | 0.98                                                                                                                                                                        | (0.88, 1.1)  | 1.0               | (0.85, 1.08)  | 1.0                    | (0.84, 1.1)   | 0.9                         | (0.74, 1.06) |   |
| Black or Black British         | 0.77                                                                                                                                                                        | (0.66, 0.9)  | 0.8               | (0.68, 0.95)  | 0.8                    | (0.62, 0.9)   | 0.6                         | (0.45, 0.78) |   |
| Chinese and Other              | 0.66                                                                                                                                                                        | (0.52, 0.83) | 0.7               | (0.52, 0.86)  | 0.6                    | (0.43, 0.8)   | 0.5                         | (0.3, 0.74)  |   |
| Unclassified                   | 0.63                                                                                                                                                                        | (0.53, 0.74) | 0.6               | (0.52, 0.75)  | 0.5                    | (0.41, 0.65)  | 0.5                         | (0.35, 0.65) |   |

| Indicator                      | The proportion of the prison population who have received one, two, three or four (course of three plus booster) Hepatitis B vaccinations in the preceding 12 months |                                             |                    |                                                                                               |                    |                                             |                   |                                             |
|--------------------------------|----------------------------------------------------------------------------------------------------------------------------------------------------------------------|---------------------------------------------|--------------------|-----------------------------------------------------------------------------------------------|--------------------|---------------------------------------------|-------------------|---------------------------------------------|
|                                | Domain: Communicable Disease                                                                                                                                         |                                             |                    |                                                                                               |                    |                                             |                   |                                             |
|                                | Variable                                                                                                                                                             | Multivariable                               |                    |                                                                                               |                    |                                             |                   |                                             |
|                                |                                                                                                                                                                      | 1st Hep B                                   |                    | Hepatitis B vaccines of the population who entered in the last 12 months<br>1st and 2nd Hep B |                    | 1st, 2nd and 3rd Hep B                      |                   | 1st, 2nd, 3rd and 4th Hep B                 |
|                                | OR (95% CI)                                                                                                                                                          | Probability of achieving indicator (95% CI) | OR (95% CI)        | Probability of achieving indicator (95% CI)                                                   | OR (95% CI)        | Probability of achieving indicator (95% CI) | OR (95% CI)       | Probability of achieving indicator (95% CI) |
| <b>Year</b>                    |                                                                                                                                                                      |                                             |                    |                                                                                               |                    |                                             |                   |                                             |
| 2017/18 (comparator)           | 1.0                                                                                                                                                                  | 0.33 (0.26, 0.39)                           | 1.0                | 0.24 (0.24, 0.25)                                                                             | 1.0                | 0.19 (0.04, 0.34)                           | 1.0               | 0.07 (-0.03, 0.16)                          |
| 2018/19                        | 0.93 (0.88, 0.98)                                                                                                                                                    | 0.31 (0.25, 0.38)                           | 1.05 (0.98, 1.11)  | 0.25 (0.24, 0.26)                                                                             | 0.46 (0.43, 0.5)   | 0.1 (0.02, 0.18)                            | 1.56 (1.41, 1.72) | 0.1 (-0.04, 0.23)                           |
| 2019/20                        | 2.45 (2.32, 2.6)                                                                                                                                                     | 0.53 (0.43, 0.64)                           | 2.67 (2.52, 2.84)  | 0.45 (0.44, 0.46)                                                                             | 2.73 (2.56, 2.91)  | 0.37 (0.08, 0.67)                           | 3.18 (2.89, 3.49) | 0.18 (-0.07, 0.42)                          |
| <b>Prison</b>                  |                                                                                                                                                                      |                                             |                    |                                                                                               |                    |                                             |                   |                                             |
| Prison 1                       | 1.53 (1.36, 1.72)                                                                                                                                                    | 0.49 (0.39, 0.59)                           | 1.64 (1.45, 1.85)  | 0.41 (0.38, 0.44)                                                                             | 1.88 (1.64, 2.14)  | 0.32 (0.07, 0.57)                           | 1.59 (1.35, 1.86) | 0.17 (-0.07, 0.4)                           |
| Prison 2                       | 0.52 (0.48, 0.56)                                                                                                                                                    | 0.26 (0.2, 0.31)                            | 0.55 (0.5, 0.6)    | 0.2 (0.18, 0.21)                                                                              | 0.55 (0.5, 0.61)   | 0.13 (0.03, 0.24)                           | 0.48 (0.42, 0.54) | 0.06 (-0.02, 0.14)                          |
| Prison 3                       | 1.15 (1.05, 1.25)                                                                                                                                                    | 0.42 (0.34, 0.51)                           | 1.2 (1.1, 1.32)    | 0.34 (0.32, 0.37)                                                                             | 1.32 (1.19, 1.47)  | 0.25 (0.05, 0.45)                           | 1.53 (1.35, 1.73) | 0.16 (-0.06, 0.39)                          |
| Prison 4                       | 1.2 (1.09, 1.32)                                                                                                                                                     | 0.43 (0.34, 0.52)                           | 1.29 (1.17, 1.42)  | 0.36 (0.33, 0.38)                                                                             | 1.38 (1.24, 1.54)  | 0.26 (0.06, 0.47)                           | 1.45 (1.27, 1.66) | 0.16 (-0.06, 0.38)                          |
| Prison 5                       | 1.26 (1.07, 1.48)                                                                                                                                                    | 0.45 (0.35, 0.54)                           | 1.5 (1.27, 1.77)   | 0.39 (0.35, 0.43)                                                                             | 1.67 (1.39, 2)     | 0.29 (0.06, 0.53)                           | 1.37 (1.08, 1.72) | 0.15 (-0.06, 0.36)                          |
| Prison 6                       | 1.83 (1.63, 2.04)                                                                                                                                                    | 0.53 (0.42, 0.64)                           | 2.03 (1.81, 2.27)  | 0.46 (0.43, 0.49)                                                                             | 1.93 (1.7, 2.19)   | 0.32 (0.07, 0.58)                           | 1.31 (1.12, 1.54) | 0.14 (-0.06, 0.35)                          |
| Prison 7                       | 2.04 (0.97, 4.28)                                                                                                                                                    | 0.56 (0.36, 0.75)                           | 2.03 (0.92, 4.52)  | 0.46 (0.29, 0.63)                                                                             | 2.14 (0.83, 5.49)  | 0.34 (0.02, 0.66)                           | 1.29 (0.35, 4.66) | 0.14 (-0.1, 0.38)                           |
| Prison 8                       | 0.88 (0.42, 1.83)                                                                                                                                                    | 0.36 (0.2, 0.53)                            | 0.95 (0.43, 2.09)  | 0.29 (0.15, 0.43)                                                                             | 0.84 (0.33, 2.15)  | 0.18 (0, 0.37)                              | 0.44 (0.12, 1.61) | 0.06 (-0.04, 0.15)                          |
| Prison 9                       | 1.08 (0.9, 1.28)                                                                                                                                                     | 0.41 (0.32, 0.5)                            | 1.12 (0.93, 1.34)  | 0.33 (0.29, 0.37)                                                                             | 1.31 (1.08, 1.59)  | 0.25 (0.05, 0.45)                           | 1.5 (1.19, 1.88)  | 0.16 (-0.06, 0.39)                          |
| Prison 10                      | 1.05 (0.97, 1.13)                                                                                                                                                    | 0.4 (0.32, 0.49)                            | 0.97 (0.89, 1.05)  | 0.3 (0.28, 0.32)                                                                              | 1 (0.91, 1.09)     | 0.21 (0.04, 0.37)                           | 0.81 (0.72, 0.92) | 0.1 (-0.04, 0.23)                           |
| Prison 11 (comparator)         | 1.0                                                                                                                                                                  | 0.39 (0.31, 0.47)                           | 1.0                | 0.3 (0.29, 0.32)                                                                              | 1.0                | 0.21 (0.04, 0.37)                           | 1.0               | 0.12 (-0.05, 0.28)                          |
| Prison 12                      | 1.66 (1.42, 1.94)                                                                                                                                                    | 0.51 (0.4, 0.62)                            | 1.91 (1.63, 2.24)  | 0.45 (0.41, 0.49)                                                                             | 1.56 (1.3, 1.87)   | 0.28 (0.06, 0.51)                           | 0.95 (0.74, 1.23) | 0.11 (-0.04, 0.27)                          |
| Prison 13                      | 1.15 (0.93, 1.42)                                                                                                                                                    | 0.42 (0.33, 0.52)                           | 1.16 (0.93, 1.44)  | 0.33 (0.29, 0.38)                                                                             | 1.12 (0.87, 1.42)  | 0.23 (0.04, 0.41)                           | 0.99 (0.73, 1.35) | 0.11 (-0.05, 0.28)                          |
| <b>Prison category</b>         |                                                                                                                                                                      |                                             |                    |                                                                                               |                    |                                             |                   |                                             |
| A (comparator)                 | -                                                                                                                                                                    | -                                           | -                  | -                                                                                             | -                  | -                                           | -                 | -                                           |
| B                              | -                                                                                                                                                                    | -                                           | -                  | -                                                                                             | -                  | -                                           | -                 | -                                           |
| C                              | -                                                                                                                                                                    | -                                           | -                  | -                                                                                             | -                  | -                                           | -                 | -                                           |
| Closed                         | -                                                                                                                                                                    | -                                           | -                  | -                                                                                             | -                  | -                                           | -                 | -                                           |
| D                              | -                                                                                                                                                                    | -                                           | -                  | -                                                                                             | -                  | -                                           | -                 | -                                           |
| YOI                            | -                                                                                                                                                                    | -                                           | -                  | -                                                                                             | -                  | -                                           | -                 | -                                           |
| <b>Gender</b>                  |                                                                                                                                                                      |                                             |                    |                                                                                               |                    |                                             |                   |                                             |
| Female (comparator)            | 1.0                                                                                                                                                                  | 0.46 (0.29, 0.64)                           | 1.0                | 0.36 (0.21, 0.51)                                                                             | 1.0                | 0.26 (0.01, 0.51)                           | 1.0               | 0.18 (-0.12, 0.48)                          |
| Male                           | 0.71 (0.34, 1.48)                                                                                                                                                    | 0.39 (0.31, 0.47)                           | 0.79 (0.36, 1.73)  | 0.31 (0.3, 0.33)                                                                              | 0.78 (0.3, 1.98)   | 0.22 (0.05, 0.39)                           | 0.52 (0.15, 1.88) | 0.11 (-0.04, 0.26)                          |
| <b>Age - years</b>             |                                                                                                                                                                      |                                             |                    |                                                                                               |                    |                                             |                   |                                             |
| 10 - <20                       | 0.55 (0.46, 0.66)                                                                                                                                                    | 0.28 (0.22, 0.35)                           | 0.58 (0.48, 0.71)  | 0.22 (0.19, 0.26)                                                                             | 0.6 (0.47, 0.75)   | 0.15 (0.03, 0.28)                           | 0.35 (0.23, 0.52) | 0.04 (-0.02, 0.11)                          |
| 20 - <30                       | 1.03 (0.98, 1.09)                                                                                                                                                    | 0.41 (0.33, 0.49)                           | 1.05 (0.99, 1.11)  | 0.33 (0.32, 0.34)                                                                             | 1.07 (1, 1.14)     | 0.23 (0.05, 0.42)                           | 1.07 (0.99, 1.16) | 0.12 (-0.05, 0.29)                          |
| 30 - <40 (comparator)          | 1.0                                                                                                                                                                  | 0.4 (0.32, 0.49)                            | 1.0                | 0.32 (0.31, 0.33)                                                                             | 1.0                | 0.22 (0.05, 0.4)                            | 1.0               | 0.12 (-0.04, 0.28)                          |
| 40 - <50                       | 0.92 (0.86, 0.98)                                                                                                                                                    | 0.39 (0.31, 0.46)                           | 0.9 (0.84, 0.96)   | 0.3 (0.29, 0.31)                                                                              | 0.93 (0.86, 1.01)  | 0.21 (0.05, 0.38)                           | 0.9 (0.82, 0.99)  | 0.11 (-0.04, 0.25)                          |
| 50 - <60                       | 0.84 (0.76, 0.91)                                                                                                                                                    | 0.37 (0.29, 0.44)                           | 0.84 (0.77, 0.92)  | 0.29 (0.27, 0.31)                                                                             | 0.91 (0.82, 1.01)  | 0.21 (0.04, 0.37)                           | 0.83 (0.72, 0.95) | 0.1 (-0.04, 0.23)                           |
| 60 - <70                       | 0.75 (0.64, 0.88)                                                                                                                                                    | 0.34 (0.27, 0.42)                           | 0.77 (0.65, 0.91)  | 0.27 (0.24, 0.3)                                                                              | 0.72 (0.59, 0.89)  | 0.18 (0.04, 0.32)                           | 0.55 (0.41, 0.74) | 0.07 (-0.03, 0.17)                          |
| 70 - <80                       | 0.58 (0.42, 0.79)                                                                                                                                                    | 0.29 (0.21, 0.37)                           | 0.55 (0.39, 0.78)  | 0.22 (0.16, 0.27)                                                                             | 0.64 (0.44, 0.95)  | 0.16 (0.03, 0.3)                            | 0.43 (0.24, 0.78) | 0.05 (-0.03, 0.14)                          |
| 80 - <90                       | 0.48 (0.25, 0.92)                                                                                                                                                    | 0.26 (0.13, 0.38)                           | 0.43 (0.21, 0.9)   | 0.18 (0.08, 0.28)                                                                             | 0.41 (0.17, 0.99)  | 0.11 (-0.01, 0.24)                          | 0.82 (0.32, 2.11) | 0.1 (-0.06, 0.26)                           |
| 90 - <100                      | 0.82 (0.08, 8.61)                                                                                                                                                    | 0.36 (-0.15, 0.87)                          | 1.16 (0.11, 12.41) | 0.35 (-0.14, 0.85)                                                                            | 2.34 (0.19, 28.24) | 0.38 (-0.21, 0.96)                          | -                 | -                                           |
| 100 - <110                     | -                                                                                                                                                                    | -                                           | -                  | -                                                                                             | -                  | -                                           | -                 | -                                           |
| <b>Length of Stay (months)</b> |                                                                                                                                                                      |                                             |                    |                                                                                               |                    |                                             |                   |                                             |
| <1                             | 0.76 (0.72, 0.81)                                                                                                                                                    | 0.34 (0.27, 0.41)                           | 0.72 (0.68, 0.76)  | 0.25 (0.24, 0.26)                                                                             | 0.69 (0.65, 0.74)  | 0.17 (0.04, 0.3)                            | 0.84 (0.77, 0.92) | 0.09 (-0.04, 0.22)                          |
| 1-<6 (comparator)              | 1.0                                                                                                                                                                  | 0.4 (0.32, 0.48)                            | 1.0                | 0.32 (0.31, 0.32)                                                                             | 1.0                | 0.22 (0.05, 0.39)                           | 1.0               | 0.11 (-0.04, 0.25)                          |
| 6-<12                          | 1.14 (1.06, 1.22)                                                                                                                                                    | 0.42 (0.34, 0.51)                           | 1.18 (1.1, 1.27)   | 0.35 (0.34, 0.36)                                                                             | 1.26 (1.16, 1.36)  | 0.26 (0.06, 0.46)                           | 1.19 (1.07, 1.31) | 0.12 (-0.05, 0.29)                          |
| 12-<24                         | 1.65 (1.5, 1.8)                                                                                                                                                      | 0.51 (0.41, 0.61)                           | 1.78 (1.63, 1.95)  | 0.44 (0.42, 0.46)                                                                             | 1.75 (1.57, 1.95)  | 0.32 (0.07, 0.57)                           | 2.02 (1.78, 2.29) | 0.19 (-0.07, 0.45)                          |
| 24+                            | 1.68 (1.43, 1.98)                                                                                                                                                    | 0.51 (0.41, 0.62)                           | 1.81 (1.53, 2.14)  | 0.44 (0.41, 0.48)                                                                             | 1.86 (1.56, 2.21)  | 0.33 (0.07, 0.59)                           | 2.13 (1.68, 2.7)  | 0.2 (-0.08, 0.47)                           |
| <b>Ethnic Group</b>            |                                                                                                                                                                      |                                             |                    |                                                                                               |                    |                                             |                   |                                             |
| White (comparator)             | 1.0                                                                                                                                                                  | 0.4 (0.32, 0.48)                            | 1.0                | 0.32 (0.32, 0.33)                                                                             | 1.0                | 0.23 (0.05, 0.4)                            | 1.0               | 0.12 (-0.04, 0.28)                          |
| Mixed                          | 0.87 (0.74, 1.02)                                                                                                                                                    | 0.37 (0.29, 0.45)                           | 0.83 (0.7, 0.98)   | 0.28 (0.25, 0.32)                                                                             | 0.79 (0.65, 0.96)  | 0.19 (0.04, 0.34)                           | 0.85 (0.66, 1.1)  | 0.1 (-0.04, 0.24)                           |
| Asian or Asian British         | 0.86 (0.77, 0.97)                                                                                                                                                    | 0.37 (0.29, 0.45)                           | 0.82 (0.73, 0.93)  | 0.28 (0.26, 0.31)                                                                             | 0.84 (0.73, 0.97)  | 0.2 (0.04, 0.36)                            | 0.84 (0.7, 1.01)  | 0.1 (-0.04, 0.24)                           |
| Black or Black British         | 0.76 (0.65, 0.9)                                                                                                                                                     | 0.34 (0.27, 0.42)                           | 0.77 (0.65, 0.92)  | 0.27 (0.24, 0.3)                                                                              | 0.73 (0.6, 0.89)   | 0.18 (0.04, 0.33)                           | 0.6 (0.45, 0.8)   | 0.07 (-0.03, 0.18)                          |
| Chinese and Other              | 0.72 (0.57, 0.92)                                                                                                                                                    | 0.33 (0.25, 0.41)                           | 0.74 (0.57, 0.95)  | 0.26 (0.22, 0.31)                                                                             | 0.66 (0.48, 0.9)   | 0.17 (0.03, 0.3)                            | 0.55 (0.34, 0.86) | 0.07 (-0.03, 0.17)                          |
| Unclassified                   | 0.56 (0.47, 0.66)                                                                                                                                                    | 0.28 (0.22, 0.35)                           | 0.55 (0.45, 0.66)  | 0.21 (0.18, 0.24)                                                                             | 0.45 (0.36, 0.57)  | 0.12 (0.02, 0.22)                           | 0.42 (0.3, 0.58)  | 0.05 (-0.02, 0.13)                          |

| Indicator                      | <i>The proportion of the prison population who have received one, two, three or four (course of three plus booster) Hepatitis B vaccinations in the preceding 12 months</i> |                   |                        |                             |      |              |      |              |
|--------------------------------|-----------------------------------------------------------------------------------------------------------------------------------------------------------------------------|-------------------|------------------------|-----------------------------|------|--------------|------|--------------|
|                                | Group: Communicable Disease                                                                                                                                                 |                   | Univariate             |                             |      |              |      |              |
|                                | Patients resident in the study prison in the last 12 months with a clinical code added at any time indicating a history of any illicit drug use                             |                   |                        |                             |      |              |      |              |
|                                | Odds Ratio (OR) of achieving indicator (95% CI)                                                                                                                             |                   |                        |                             |      |              |      |              |
| Variable                       | 1st Hep B                                                                                                                                                                   | 1st and 2nd Hep B | 1st, 2nd and 3rd Hep B | 1st, 2nd, 3rd and 4th Hep B |      |              |      |              |
| <b>Year</b>                    |                                                                                                                                                                             |                   |                        |                             |      |              |      |              |
| 2017/18 (comparator)           | 1.0                                                                                                                                                                         | -                 | 1.0                    | -                           | 1.0  | -            | 1.0  | -            |
| 2018/19                        | 2.03                                                                                                                                                                        | (1.89, 2.17)      | 1.33                   | (1.24, 1.43)                | 1.36 | (1.26, 1.46) | 1.36 | (1.21, 1.52) |
| 2019/20                        | 3.09                                                                                                                                                                        | (2.9, 3.3)        | 2.13                   | (1.99, 2.27)                | 2.12 | (1.97, 2.27) | 2.19 | (1.98, 2.42) |
| <b>Prison</b>                  |                                                                                                                                                                             |                   |                        |                             |      |              |      |              |
| Prison 1                       | 1.52                                                                                                                                                                        | (1.36, 1.69)      | 1.67                   | (1.49, 1.87)                | 1.97 | (1.75, 2.23) | 2.02 | (1.7, 2.41)  |
| Prison 2                       | 0.85                                                                                                                                                                        | (0.77, 0.95)      | 0.85                   | (0.77, 0.95)                | 0.88 | (0.78, 0.99) | 0.71 | (0.58, 0.87) |
| Prison 3                       | 1.76                                                                                                                                                                        | (1.59, 1.94)      | 1.87                   | (1.69, 2.08)                | 2.09 | (1.87, 2.33) | 2.98 | (2.56, 3.46) |
| Prison 4                       | 2.04                                                                                                                                                                        | (1.84, 2.26)      | 2.15                   | (1.94, 2.39)                | 2.51 | (2.25, 2.81) | 2.79 | (2.39, 3.26) |
| Prison 5                       | 1.86                                                                                                                                                                        | (1.38, 2.51)      | 2.14                   | (1.59, 2.89)                | 2.47 | (1.81, 3.37) | 2.07 | (1.32, 3.22) |
| Prison 6                       | 1.90                                                                                                                                                                        | (1.68, 2.15)      | 1.96                   | (1.73, 2.22)                | 2.37 | (2.08, 2.71) | 1.90 | (1.56, 2.32) |
| Prison 7                       | 4.61                                                                                                                                                                        | (4, 5.33)         | 4.57                   | (3.97, 5.25)                | 4.88 | (4.23, 5.63) | 4.46 | (3.73, 5.35) |
| Prison 8                       | 2.30                                                                                                                                                                        | (2.04, 2.6)       | 2.03                   | (1.79, 2.3)                 | 2.04 | (1.78, 2.33) | 1.96 | (1.62, 2.38) |
| Prison 9                       | 2.20                                                                                                                                                                        | (1.72, 2.82)      | 2.03                   | (1.58, 2.61)                | 2.25 | (1.73, 2.92) | 3.72 | (2.73, 5.06) |
| Prison 10                      | 1.66                                                                                                                                                                        | (1.52, 1.8)       | 1.50                   | (1.37, 1.64)                | 1.50 | (1.35, 1.66) | 1.46 | (1.26, 1.7)  |
| Prison 11 (comparator)         | 1.0                                                                                                                                                                         | -                 | 1.0                    | -                           | 1.0  | -            | 1.0  | -            |
| Prison 12                      | 2.61                                                                                                                                                                        | (2.24, 3.04)      | 3.03                   | (2.6, 3.52)                 | 3.73 | (3.19, 4.37) | 1.70 | (1.32, 2.19) |
| Prison 13                      | 1.39                                                                                                                                                                        | (1.09, 1.77)      | 1.42                   | (1.11, 1.82)                | 1.64 | (1.26, 2.14) | 1.56 | (1.06, 2.3)  |
| <b>Prison category</b>         |                                                                                                                                                                             |                   |                        |                             |      |              |      |              |
| A (comparator)                 | 1.0                                                                                                                                                                         | -                 | 1.0                    | -                           | 1.0  | -            | 1.0  | -            |
| B                              | 0.67                                                                                                                                                                        | (0.57, 0.8)       | 0.67                   | (0.56, 0.79)                | 0.59 | (0.49, 0.71) | 0.43 | (0.34, 0.55) |
| C                              | 1.02                                                                                                                                                                        | (0.86, 1.22)      | 1.12                   | (0.94, 1.34)                | 1.14 | (0.95, 1.38) | 1.05 | (0.83, 1.32) |
| Closed                         | 1.76                                                                                                                                                                        | (1.47, 2.12)      | 1.69                   | (1.4, 2.04)                 | 1.56 | (1.29, 1.9)  | 1.16 | (0.91, 1.48) |
| D                              | 1.09                                                                                                                                                                        | (0.9, 1.33)       | 1.17                   | (0.96, 1.43)                | 1.25 | (1.01, 1.53) | 0.76 | (0.58, 1)    |
| YOI                            | 1.50                                                                                                                                                                        | (1.21, 1.86)      | 1.79                   | (1.44, 2.22)                | 1.95 | (1.56, 2.44) | 0.68 | (0.49, 0.93) |
| <b>Gender</b>                  |                                                                                                                                                                             |                   |                        |                             |      |              |      |              |
| Female (comparator)            | 1.0                                                                                                                                                                         | -                 | 1.0                    | -                           | 1.0  | -            | 1.0  | -            |
| Male                           | 0.54                                                                                                                                                                        | (0.49, 0.59)      | 0.6                    | (0.54, 0.65)                | 0.6  | (0.56, 0.68) | 0.7  | (0.57, 0.74) |
| <b>Age - years</b>             |                                                                                                                                                                             |                   |                        |                             |      |              |      |              |
| 10 - <20                       | 0.99                                                                                                                                                                        | (0.83, 1.19)      | 1.0                    | (0.81, 1.17)                | 1.1  | (0.88, 1.29) | 0.4  | (0.26, 0.58) |
| 20 - <30                       | 1.00                                                                                                                                                                        | (0.94, 1.06)      | 1.0                    | (0.98, 1.1)                 | 1.0  | (0.96, 1.1)  | 0.9  | (0.84, 1.01) |
| 30 - <40 (comparator)          | 1.0                                                                                                                                                                         | -                 | 1.0                    | -                           | 1.0  | -            | 1.0  | -            |
| 40 - <50                       | 0.93                                                                                                                                                                        | (0.86, 0.99)      | 0.9                    | (0.85, 0.98)                | 0.9  | (0.84, 0.99) | 0.9  | (0.79, 0.98) |
| 50 - <60                       | 0.91                                                                                                                                                                        | (0.81, 1.02)      | 0.9                    | (0.82, 1.04)                | 1.0  | (0.85, 1.1)  | 0.8  | (0.68, 0.99) |
| 60 - <70                       | 0.54                                                                                                                                                                        | (0.4, 0.74)       | 0.6                    | (0.4, 0.77)                 | 0.5  | (0.37, 0.78) | 0.6  | (0.32, 0.95) |
| 70 - <80                       | 0.99                                                                                                                                                                        | (0.43, 2.25)      | 1.0                    | (0.44, 2.32)                | 0.9  | (0.38, 2.35) | 1.1  | (0.33, 3.76) |
| 80 - <90                       | 0.23                                                                                                                                                                        | (0.03, 1.83)      | 0.3                    | (0.03, 2.16)                | 0.4  | (0.05, 3)    | 1.0  | (0.13, 8.31) |
| 90 - <100                      | -                                                                                                                                                                           | -                 | -                      | -                           | -    | -            | -    | -            |
| 100 - <110                     | -                                                                                                                                                                           | -                 | -                      | -                           | -    | -            | -    | -            |
| <b>Length of Stay (months)</b> |                                                                                                                                                                             |                   |                        |                             |      |              |      |              |
| <1                             | 0.70                                                                                                                                                                        | (0.66, 0.74)      | 0.6                    | (0.6, 0.69)                 | 0.6  | (0.55, 0.63) | 0.7  | (0.61, 0.75) |
| 1-6 (comparator)               | 1.0                                                                                                                                                                         | -                 | 1.0                    | -                           | 1.0  | -            | 1.0  | -            |
| 6-12                           | 1.21                                                                                                                                                                        | (1.12, 1.3)       | 1.3                    | (1.16, 1.35)                | 1.4  | (1.26, 1.48) | 1.3  | (1.2, 1.49)  |
| 12-24                          | 1.90                                                                                                                                                                        | (1.71, 2.1)       | 2.0                    | (1.84, 2.26)                | 2.3  | (2.03, 2.52) | 2.5  | (2.19, 2.92) |
| 24+                            | 1.83                                                                                                                                                                        | (1.46, 2.29)      | 1.8                    | (1.46, 2.29)                | 2.1  | (1.66, 2.64) | 2.8  | (2.1, 3.83)  |
| <b>Ethnic Group</b>            |                                                                                                                                                                             |                   |                        |                             |      |              |      |              |
| White (comparator)             | 1.0                                                                                                                                                                         | -                 | 1.0                    | -                           | 1.0  | -            | 1.0  | -            |
| Mixed                          | 0.94                                                                                                                                                                        | (0.76, 1.17)      | 1.0                    | (0.8, 1.24)                 | 0.9  | (0.74, 1.19) | 1.1  | (0.8, 1.46)  |
| Asian or Asian British         | 1.13                                                                                                                                                                        | (0.95, 1.34)      | 1.2                    | (0.98, 1.39)                | 1.2  | (0.97, 1.39) | 1.1  | (0.84, 1.36) |
| Black or Black British         | 0.76                                                                                                                                                                        | (0.6, 0.95)       | 0.8                    | (0.61, 0.99)                | 0.9  | (0.68, 1.12) | 0.5  | (0.36, 0.81) |
| Chinese and Other              | 0.77                                                                                                                                                                        | (0.53, 1.13)      | 0.8                    | (0.56, 1.22)                | 0.9  | (0.57, 1.29) | 0.8  | (0.47, 1.49) |
| Unclassified                   | 0.62                                                                                                                                                                        | (0.5, 0.78)       | 0.7                    | (0.55, 0.87)                | 0.7  | (0.52, 0.86) | 0.5  | (0.35, 0.77) |

| Indicator                      | The proportion of the prison population who have received one, two, three or four (course of three plus booster) Hepatitis B vaccinations in the preceding 12 months |                                                                                                                                                 |                    |                                             |                    |                                             |                    |                                             |
|--------------------------------|----------------------------------------------------------------------------------------------------------------------------------------------------------------------|-------------------------------------------------------------------------------------------------------------------------------------------------|--------------------|---------------------------------------------|--------------------|---------------------------------------------|--------------------|---------------------------------------------|
|                                | Domain: Communicable Disease                                                                                                                                         |                                                                                                                                                 |                    |                                             |                    |                                             |                    |                                             |
|                                | Multivariable                                                                                                                                                        |                                                                                                                                                 |                    |                                             |                    |                                             |                    |                                             |
|                                | Variable                                                                                                                                                             | Patients resident in the study prison in the last 12 months with a clinical code added at any time indicating a history of any illicit drug use |                    |                                             |                    |                                             |                    |                                             |
| 1st Hep B                      |                                                                                                                                                                      | 1st and 2nd Hep B                                                                                                                               |                    | 1st, 2nd and 3rd Hep B                      |                    | 1st, 2nd, 3rd and 4th Hep B                 |                    |                                             |
|                                | OR (95% CI)                                                                                                                                                          | Probability of achieving indicator (95% CI)                                                                                                     | OR (95% CI)        | Probability of achieving indicator (95% CI) | OR (95% CI)        | Probability of achieving indicator (95% CI) | OR (95% CI)        | Probability of achieving indicator (95% CI) |
| <b>Year</b>                    |                                                                                                                                                                      |                                                                                                                                                 |                    |                                             |                    |                                             |                    |                                             |
| 2017/18 (comparator)           | 1.0                                                                                                                                                                  | 0.27 (0.02, 0.52)                                                                                                                               | 1.0                | 0.27 (0.09, 0.44)                           | 1.0                | 0.2 (0.03, 0.38)                            | 1.0                | 0.08 (0.07, 0.09)                           |
| 2018/19                        | 2.25 (2.08, 2.44)                                                                                                                                                    | 0.44 (0.03, 0.86)                                                                                                                               | 1.42 (1.31, 1.54)  | 0.34 (0.12, 0.56)                           | 1.46 (1.34, 1.6)   | 0.27 (0.04, 0.5)                            | 1.46 (1.29, 1.66)  | 0.11 (0.1, 0.12)                            |
| 2019/20                        | 3.64 (3.37, 3.93)                                                                                                                                                    | 0.56 (0.04, 1.07)                                                                                                                               | 2.5 (2.31, 2.7)    | 0.46 (0.16, 0.77)                           | 2.62 (2.41, 2.85)  | 0.39 (0.06, 0.72)                           | 2.89 (2.57, 3.25)  | 0.19 (0.18, 0.2)                            |
| <b>Prison</b>                  |                                                                                                                                                                      |                                                                                                                                                 |                    |                                             |                    |                                             |                    |                                             |
| Prison 1                       | 1.79 (1.55, 2.06)                                                                                                                                                    | 0.49 (0.03, 0.94)                                                                                                                               | 1.81 (1.57, 2.09)  | 0.43 (0.14, 0.71)                           | 2.04 (1.76, 2.36)  | 0.38 (0.05, 0.71)                           | 2.1 (1.72, 2.55)   | 0.19 (0.12, 0.26)                           |
| Prison 2                       | 0.64 (0.57, 0.71)                                                                                                                                                    | 0.27 (0.02, 0.52)                                                                                                                               | 0.62 (0.55, 0.7)   | 0.21 (0.07, 0.35)                           | 0.64 (0.56, 0.73)  | 0.17 (0.02, 0.31)                           | 0.52 (0.42, 0.64)  | 0.06 (0.02, 0.09)                           |
| Prison 3                       | 1.48 (1.31, 1.66)                                                                                                                                                    | 0.44 (0.03, 0.86)                                                                                                                               | 1.51 (1.34, 1.7)   | 0.38 (0.13, 0.64)                           | 1.63 (1.43, 1.85)  | 0.33 (0.05, 0.62)                           | 2.34 (1.97, 2.76)  | 0.21 (0.13, 0.28)                           |
| Prison 4                       | 1.37 (1.21, 1.55)                                                                                                                                                    | 0.43 (0.03, 0.83)                                                                                                                               | 1.41 (1.24, 1.59)  | 0.37 (0.13, 0.61)                           | 1.62 (1.42, 1.85)  | 0.33 (0.05, 0.61)                           | 2.05 (1.72, 2.45)  | 0.19 (0.12, 0.26)                           |
| Prison 5                       | 1.27 (0.88, 1.84)                                                                                                                                                    | 0.41 (0.02, 0.8)                                                                                                                                | 1.38 (0.95, 1.99)  | 0.36 (0.11, 0.61)                           | 1.74 (1.19, 2.54)  | 0.35 (0.04, 0.65)                           | 1.77 (1.07, 2.96)  | 0.17 (0.07, 0.26)                           |
| Prison 6                       | 2.13 (1.82, 2.49)                                                                                                                                                    | 0.53 (0.03, 1.02)                                                                                                                               | 2.03 (1.74, 2.38)  | 0.45 (0.15, 0.75)                           | 2.39 (2.03, 2.81)  | 0.42 (0.06, 0.77)                           | 1.79 (1.44, 2.24)  | 0.17 (0.1, 0.24)                            |
| Prison 7                       | 6.99 (0.72, 68.36)                                                                                                                                                   | 0.77 (-0.02, 1.56)                                                                                                                              | 7.86 (0.79, 78.66) | 0.75 (0.14, 1.35)                           | 3.11 (0.38, 25.12) | 0.48 (-0.13, 1.08)                          | 1.32 (0.05, 37.59) | 0.13 (-0.18, 0.44)                          |
| Prison 8                       | 3.93 (0.4, 38.46)                                                                                                                                                    | 0.66 (-0.08, 1.41)                                                                                                                              | 3.81 (0.38, 38.22) | 0.6 (-0.01, 1.21)                           | 1.3 (0.16, 10.57)  | 0.29 (-0.16, 0.73)                          | 0.52 (0.02, 14.9)  | 0.06 (-0.09, 0.2)                           |
| Prison 9                       | 1.52 (1.15, 2)                                                                                                                                                       | 0.45 (0.02, 0.87)                                                                                                                               | 1.34 (1.02, 1.77)  | 0.36 (0.12, 0.6)                            | 1.4 (1.05, 1.87)   | 0.3 (0.04, 0.56)                            | 2.34 (1.68, 3.26)  | 0.21 (0.12, 0.29)                           |
| Prison 10                      | 1.37 (1.24, 1.51)                                                                                                                                                    | 0.42 (0.03, 0.82)                                                                                                                               | 1.2 (1.09, 1.34)   | 0.33 (0.11, 0.55)                           | 1.19 (1.07, 1.34)  | 0.27 (0.04, 0.5)                            | 1.23 (1.05, 1.45)  | 0.12 (0.07, 0.18)                           |
| Prison 11 (comparator)         | 1.0                                                                                                                                                                  | 0.36 (0.02, 0.69)                                                                                                                               | 1.0                | 0.3 (0.1, 0.49)                             | 1.0                | 0.24 (0.03, 0.44)                           | 1.0                | 0.1 (0.05, 0.16)                            |
| Prison 12                      | 1.92 (1.57, 2.34)                                                                                                                                                    | 0.5 (0.03, 0.97)                                                                                                                                | 2.11 (1.73, 2.57)  | 0.46 (0.16, 0.77)                           | 2.42 (1.97, 2.98)  | 0.42 (0.06, 0.78)                           | 1.6 (1.19, 2.15)   | 0.15 (0.08, 0.22)                           |
| Prison 13                      | 1.5 (1.11, 2.02)                                                                                                                                                     | 0.45 (0.02, 0.87)                                                                                                                               | 1.39 (1.03, 1.87)  | 0.37 (0.12, 0.61)                           | 1.52 (1.12, 2.06)  | 0.32 (0.04, 0.59)                           | 1.38 (0.92, 2.1)   | 0.14 (0.06, 0.21)                           |
| <b>Prison category</b>         |                                                                                                                                                                      |                                                                                                                                                 |                    |                                             |                    |                                             |                    |                                             |
| A (comparator)                 | -                                                                                                                                                                    | -                                                                                                                                               | -                  | -                                           | -                  | -                                           | -                  | -                                           |
| B                              | -                                                                                                                                                                    | -                                                                                                                                               | -                  | -                                           | -                  | -                                           | -                  | -                                           |
| C                              | -                                                                                                                                                                    | -                                                                                                                                               | -                  | -                                           | -                  | -                                           | -                  | -                                           |
| Closed                         | -                                                                                                                                                                    | -                                                                                                                                               | -                  | -                                           | -                  | -                                           | -                  | -                                           |
| D                              | -                                                                                                                                                                    | -                                                                                                                                               | -                  | -                                           | -                  | -                                           | -                  | -                                           |
| YOI                            | -                                                                                                                                                                    | -                                                                                                                                               | -                  | -                                           | -                  | -                                           | -                  | -                                           |
| <b>Gender</b>                  |                                                                                                                                                                      |                                                                                                                                                 |                    |                                             |                    |                                             |                    |                                             |
| Female (comparator)            | 1.0                                                                                                                                                                  | 0.28 (-0.17, 0.73)                                                                                                                              | 1.0                | 0.21 (-0.12, 0.54)                          | 1.0                | 0.31 (-0.14, 0.77)                          | 1.0                | 0.26 (-0.28, 0.81)                          |
| Male                           | 2.26 (0.23, 22.07)                                                                                                                                                   | 0.44 (0.03, 0.86)                                                                                                                               | 2.51 (0.25, 25.14) | 0.38 (0.13, 0.63)                           | 0.87 (0.11, 7.02)  | 0.29 (0.04, 0.53)                           | 0.35 (0.01, 10)    | 0.12 (0.1, 0.14)                            |
| <b>Age - years</b>             |                                                                                                                                                                      |                                                                                                                                                 |                    |                                             |                    |                                             |                    |                                             |
| 10 - <20                       | 0.6 (0.47, 0.76)                                                                                                                                                     | 0.33 (0.02, 0.63)                                                                                                                               | 0.54 (0.42, 0.7)   | 0.25 (0.08, 0.41)                           | 0.62 (0.47, 0.8)   | 0.21 (0.03, 0.39)                           | 0.37 (0.23, 0.6)   | 0.06 (0.03, 0.08)                           |
| 20 - <30                       | 1.01 (0.94, 1.09)                                                                                                                                                    | 0.44 (0.03, 0.85)                                                                                                                               | 1.06 (0.98, 1.13)  | 0.38 (0.13, 0.63)                           | 1.06 (0.98, 1.15)  | 0.31 (0.05, 0.57)                           | 1.04 (0.94, 1.15)  | 0.14 (0.13, 0.15)                           |
| 30 - <40 (comparator)          | 1.0                                                                                                                                                                  | 0.44 (0.03, 0.85)                                                                                                                               | 1.0                | 0.37 (0.13, 0.61)                           | 1.0                | 0.29 (0.05, 0.54)                           | 1.0                | 0.13 (0.13, 0.14)                           |
| 40 - <50                       | 0.89 (0.82, 0.96)                                                                                                                                                    | 0.41 (0.03, 0.79)                                                                                                                               | 0.88 (0.81, 0.95)  | 0.34 (0.12, 0.56)                           | 0.88 (0.8, 0.96)   | 0.27 (0.04, 0.5)                            | 0.84 (0.75, 0.95)  | 0.12 (0.11, 0.13)                           |
| 50 - <60                       | 0.86 (0.76, 0.99)                                                                                                                                                    | 0.41 (0.03, 0.78)                                                                                                                               | 0.88 (0.77, 1.01)  | 0.34 (0.12, 0.56)                           | 0.95 (0.83, 1.1)   | 0.29 (0.04, 0.53)                           | 0.86 (0.71, 1.06)  | 0.12 (0.1, 0.14)                            |
| 60 - <70                       | 0.55 (0.39, 0.78)                                                                                                                                                    | 0.31 (0.01, 0.61)                                                                                                                               | 0.57 (0.4, 0.81)   | 0.25 (0.08, 0.43)                           | 0.56 (0.37, 0.83)  | 0.19 (0.02, 0.37)                           | 0.62 (0.36, 1.09)  | 0.09 (0.05, 0.13)                           |
| 70 - <80                       | 0.78 (0.33, 1.82)                                                                                                                                                    | 0.38 (-0.02, 0.78)                                                                                                                              | 0.79 (0.33, 1.86)  | 0.32 (0.05, 0.59)                           | 0.71 (0.28, 1.81)  | 0.23 (-0.02, 0.48)                          | 0.8 (0.23, 2.72)   | 0.11 (0, 0.22)                              |
| 80 - <90                       | 0.21 (0.03, 1.73)                                                                                                                                                    | 0.15 (-0.15, 0.45)                                                                                                                              | 0.25 (0.03, 2.04)  | 0.13 (-0.12, 0.39)                          | 0.34 (0.04, 2.79)  | 0.13 (-0.12, 0.39)                          | 0.91 (0.11, 7.63)  | 0.12 (-0.1, 0.34)                           |
| 90 - <100                      | -                                                                                                                                                                    | -                                                                                                                                               | -                  | -                                           | -                  | -                                           | -                  | -                                           |
| 100 - <110                     | -                                                                                                                                                                    | -                                                                                                                                               | -                  | -                                           | -                  | -                                           | -                  | -                                           |
| <b>Length of Stay (months)</b> |                                                                                                                                                                      |                                                                                                                                                 |                    |                                             |                    |                                             |                    |                                             |
| <1                             | 0.83 (0.77, 0.89)                                                                                                                                                    | 0.38 (0.03, 0.74)                                                                                                                               | 0.8 (0.74, 0.86)   | 0.31 (0.11, 0.51)                           | 0.76 (0.7, 0.83)   | 0.24 (0.04, 0.44)                           | 0.84 (0.75, 0.94)  | 0.11 (0.1, 0.11)                            |
| 1-6 (comparator)               | 1.0                                                                                                                                                                  | 0.43 (0.03, 0.82)                                                                                                                               | 1.0                | 0.36 (0.13, 0.59)                           | 1.0                | 0.29 (0.04, 0.53)                           | 1.0                | 0.12 (0.12, 0.13)                           |
| 6-12                           | 1.12 (1.03, 1.23)                                                                                                                                                    | 0.45 (0.03, 0.88)                                                                                                                               | 1.15 (1.05, 1.26)  | 0.39 (0.14, 0.64)                           | 1.21 (1.1, 1.33)   | 0.32 (0.05, 0.6)                            | 1.19 (1.05, 1.35)  | 0.14 (0.13, 0.15)                           |
| 12-<24                         | 1.53 (1.36, 1.73)                                                                                                                                                    | 0.52 (0.03, 1.01)                                                                                                                               | 1.63 (1.44, 1.83)  | 0.47 (0.16, 0.77)                           | 1.73 (1.53, 1.95)  | 0.4 (0.06, 0.74)                            | 1.92 (1.64, 2.24)  | 0.2 (0.18, 0.23)                            |
| 24+                            | 1.46 (1.15, 1.85)                                                                                                                                                    | 0.51 (0.03, 0.99)                                                                                                                               | 1.44 (1.13, 1.82)  | 0.44 (0.15, 0.73)                           | 1.61 (1.25, 2.06)  | 0.39 (0.06, 0.72)                           | 1.87 (1.37, 2.56)  | 0.2 (0.16, 0.25)                            |
| <b>Ethnic Group</b>            |                                                                                                                                                                      |                                                                                                                                                 |                    |                                             |                    |                                             |                    |                                             |
| White (comparator)             | 1.0                                                                                                                                                                  | 0.43 (0.03, 0.83)                                                                                                                               | 1.0                | 0.36 (0.13, 0.6)                            | 1.0                | 0.29 (0.05, 0.54)                           | 1.0                | 0.13 (0.13, 0.13)                           |
| Mixed                          | 0.88 (0.7, 1.11)                                                                                                                                                     | 0.4 (0.02, 0.78)                                                                                                                                | 0.94 (0.75, 1.18)  | 0.35 (0.12, 0.58)                           | 0.86 (0.68, 1.1)   | 0.27 (0.04, 0.5)                            | 1.07 (0.78, 1.46)  | 0.14 (0.1, 0.17)                            |
| Asian or Asian British         | 1 (0.83, 1.19)                                                                                                                                                       | 0.43 (0.03, 0.83)                                                                                                                               | 1.04 (0.87, 1.25)  | 0.37 (0.13, 0.62)                           | 1.02 (0.85, 1.23)  | 0.3 (0.04, 0.55)                            | 1.06 (0.83, 1.37)  | 0.14 (0.11, 0.16)                           |
| Black or Black British         | 0.75 (0.59, 0.96)                                                                                                                                                    | 0.37 (0.02, 0.72)                                                                                                                               | 0.77 (0.6, 0.99)   | 0.31 (0.1, 0.52)                            | 0.84 (0.65, 1.1)   | 0.26 (0.04, 0.49)                           | 0.59 (0.38, 0.9)   | 0.08 (0.05, 0.11)                           |
| Chinese and Other              | 0.85 (0.57, 1.27)                                                                                                                                                    | 0.4 (0.02, 0.78)                                                                                                                                | 0.91 (0.61, 1.37)  | 0.34 (0.1, 0.58)                            | 0.94 (0.61, 1.44)  | 0.28 (0.03, 0.53)                           | 0.99 (0.55, 1.8)   | 0.13 (0.07, 0.19)                           |
| Unclassified                   | 0.55 (0.44, 0.7)                                                                                                                                                     | 0.31 (0.02, 0.6)                                                                                                                                | 0.6 (0.48, 0.76)   | 0.26 (0.09, 0.44)                           | 0.57 (0.44, 0.74)  | 0.2 (0.03, 0.37)                            | 0.46 (0.31, 0.69)  | 0.07 (0.04, 0.09)                           |

| Indicator                              | <i>The percentage of patients with coronary heart disease, stroke or transient ischemic attack, diabetes and/or chronic obstructive pulmonary disease who have influenza immunisation in the preceding 1 August and 31 March</i> |                |              |               |                                    |                         |               |
|----------------------------------------|----------------------------------------------------------------------------------------------------------------------------------------------------------------------------------------------------------------------------------|----------------|--------------|---------------|------------------------------------|-------------------------|---------------|
|                                        | Group: Communicable Disease                                                                                                                                                                                                      |                |              |               |                                    |                         |               |
|                                        | Variable                                                                                                                                                                                                                         | Univariate     |              | Multivariable |                                    |                         |               |
| Odds Ratio (OR) of achieving indicator |                                                                                                                                                                                                                                  | (95% CI) of OR | OR           | (95% CI)      | Probability of achieving indicator | (95% CI) of probability |               |
| <b>Year</b>                            |                                                                                                                                                                                                                                  |                |              |               |                                    |                         |               |
|                                        | 2017/18 (comparator)                                                                                                                                                                                                             | 1.0            | -            | 1.0           | -                                  | 0.44                    | (-2.36, 3.24) |
|                                        | 2018/19                                                                                                                                                                                                                          | 0.86           | (0.74, 1)    | 0.86          | (0.73, 1.03)                       | 0.41                    | (-2.2, 3.02)  |
|                                        | 2019/20                                                                                                                                                                                                                          | 1.03           | (0.89, 1.19) | 1.22          | (1.02, 1.45)                       | 0.48                    | (-2.58, 3.55) |
| <b>Prison</b>                          |                                                                                                                                                                                                                                  |                |              |               |                                    |                         |               |
|                                        | Prison 1                                                                                                                                                                                                                         | 2.58           | (1.81, 3.68) | 1.18          | (0.77, 1.82)                       | 0.51                    | (-2.71, 3.72) |
|                                        | Prison 2                                                                                                                                                                                                                         | 1.96           | (1.51, 2.54) | 1.19          | (0.87, 1.62)                       | 0.51                    | (-2.71, 3.72) |
|                                        | Prison 3                                                                                                                                                                                                                         | 5.99           | (4.59, 7.81) | 2.36          | (1.68, 3.31)                       | 0.64                    | (-3.41, 4.68) |
|                                        | Prison 4                                                                                                                                                                                                                         | 4.19           | (3.23, 5.43) | 1.28          | (0.92, 1.79)                       | 0.52                    | (-2.79, 3.83) |
|                                        | Prison 5                                                                                                                                                                                                                         | 2.52           | (1.69, 3.78) | 0.92          | (0.56, 1.51)                       | 0.46                    | (-2.45, 3.37) |
|                                        | Prison 6                                                                                                                                                                                                                         | 3.62           | (2.69, 4.88) | 1.47          | (1, 2.16)                          | 0.55                    | (-2.93, 4.03) |
|                                        | Prison 7                                                                                                                                                                                                                         | 2.93           | (2.11, 4.07) | -             | -                                  | 0.05                    | (-0.28, 0.38) |
|                                        | Prison 8                                                                                                                                                                                                                         | 1.94           | (1.46, 2.58) | -             | -                                  | 0.04                    | (-0.24, 0.33) |
|                                        | Prison 9                                                                                                                                                                                                                         | 4.83           | (3.74, 6.22) | 1.04          | (0.73, 1.49)                       | 0.48                    | (-2.58, 3.54) |
|                                        | Prison 10                                                                                                                                                                                                                        | 1.53           | (1.17, 2.01) | 1.09          | (0.79, 1.5)                        | 0.49                    | (-2.62, 3.6)  |
|                                        | Prison 11 (comparator)                                                                                                                                                                                                           | 1.0            | -            | 1.0           | -                                  | 0.47                    | (-2.54, 3.48) |
|                                        | Prison 12                                                                                                                                                                                                                        | 0.67           | (0.15, 3.05) | 0.13          | (0.02, 1.14)                       | 0.20                    | (-1.09, 1.5)  |
|                                        | Prison 13                                                                                                                                                                                                                        | 7.07           | (5.14, 9.73) | 1.70          | (1.11, 2.6)                        | 0.57                    | (-3.08, 4.23) |
| <b>Prison category</b>                 |                                                                                                                                                                                                                                  |                |              |               |                                    |                         |               |
|                                        | A (comparator)                                                                                                                                                                                                                   | 1.0            | -            |               |                                    |                         |               |
|                                        | B                                                                                                                                                                                                                                | 0.26           | (0.22, 0.31) |               |                                    |                         |               |
|                                        | C                                                                                                                                                                                                                                | 0.82           | (0.68, 0.99) |               |                                    |                         |               |
|                                        | Closed                                                                                                                                                                                                                           | 0.42           | (0.34, 0.52) |               |                                    |                         |               |
|                                        | D                                                                                                                                                                                                                                | 0.60           | (0.47, 0.76) |               |                                    |                         |               |
|                                        | YOI                                                                                                                                                                                                                              | 0.12           | (0.03, 0.56) |               |                                    |                         |               |
| <b>Gender</b>                          |                                                                                                                                                                                                                                  |                |              |               |                                    |                         |               |
|                                        | Female (comparator)                                                                                                                                                                                                              | 1.0            | -            | 1.0           | -                                  | 0.93                    | (-4.96, 6.82) |
|                                        | Male                                                                                                                                                                                                                             | 1.28           | (1.05, 1.55) | -             | -                                  | 0.40                    | (-2.14, 2.93) |
| <b>Age - years</b>                     |                                                                                                                                                                                                                                  |                |              |               |                                    |                         |               |
|                                        | 10 - <20                                                                                                                                                                                                                         | -              | -            | -             | -                                  | -                       | -             |
|                                        | 20 - <30                                                                                                                                                                                                                         | 0.69           | (0.51, 0.95) | 1.07          | (0.73, 1.57)                       | 0.46                    | (-2.45, 3.36) |
|                                        | 30 - <40                                                                                                                                                                                                                         | 0.76           | (0.62, 0.93) | 0.95          | (0.75, 1.21)                       | 0.43                    | (-2.31, 3.17) |
|                                        | 40 - <50                                                                                                                                                                                                                         | 0.83           | (0.71, 0.97) | 0.96          | (0.79, 1.16)                       | 0.43                    | (-2.32, 3.19) |
|                                        | 50 - <60 (comparator)                                                                                                                                                                                                            | 1.0            | -            | 1.0           | -                                  | 0.44                    | (-2.37, 3.25) |
|                                        | 60 - <70                                                                                                                                                                                                                         | 1.35           | (1.14, 1.61) | 1.06          | (0.87, 1.3)                        | 0.45                    | (-2.44, 3.35) |
|                                        | 70 - <80                                                                                                                                                                                                                         | 1.58           | (1.24, 2.02) | 1.14          | (0.86, 1.52)                       | 0.47                    | (-2.52, 3.46) |
|                                        | 80 - <90                                                                                                                                                                                                                         | 1.84           | (1.16, 2.92) | 1.28          | (0.76, 2.16)                       | 0.49                    | (-2.65, 3.64) |
|                                        | 90 - <100                                                                                                                                                                                                                        | 1.36           | (0.19, 9.69) | 0.78          | (0.11, 5.72)                       | 0.39                    | (-2.12, 2.9)  |
|                                        | 100 - <110                                                                                                                                                                                                                       | -              | -            | -             | -                                  | -                       | -             |
| <b>Length of Stay (months)</b>         |                                                                                                                                                                                                                                  |                |              |               |                                    |                         |               |
|                                        | <1                                                                                                                                                                                                                               | 0.41           | (0.32, 0.52) | 0.46          | (0.35, 0.6)                        | 0.17                    | (-0.92, 1.26) |
|                                        | 1-<6 (comparator)                                                                                                                                                                                                                | 1.0            | -            | 1.0           | -                                  | 0.31                    | (-1.65, 2.27) |
|                                        | 6-<12                                                                                                                                                                                                                            | 2.17           | (1.8, 2.61)  | 2.16          | (1.74, 2.69)                       | 0.49                    | (-2.6, 3.58)  |
|                                        | 12-<24                                                                                                                                                                                                                           | 3.23           | (2.66, 3.93) | 2.89          | (2.29, 3.65)                       | 0.56                    | (-2.98, 4.09) |
|                                        | 24+                                                                                                                                                                                                                              | 4.44           | (3.75, 5.27) | 3.96          | (3.09, 5.07)                       | 0.63                    | (-3.38, 4.64) |
| <b>Ethnic Group</b>                    |                                                                                                                                                                                                                                  |                |              |               |                                    |                         |               |
|                                        | White (comparator)                                                                                                                                                                                                               | 1.0            | -            | 1.0           | -                                  | 0.45                    | (-2.4, 3.29)  |
|                                        | Mixed                                                                                                                                                                                                                            | 1.44           | (0.9, 2.31)  | 1.34          | (0.8, 2.26)                        | 0.51                    | (-2.74, 3.76) |
|                                        | Asian or Asian British                                                                                                                                                                                                           | 0.88           | (0.63, 1.23) | 0.98          | (0.68, 1.43)                       | 0.44                    | (-2.38, 3.27) |
|                                        | Black or Black British                                                                                                                                                                                                           | 0.55           | (0.33, 0.92) | 0.58          | (0.34, 0.99)                       | 0.34                    | (-1.8, 2.47)  |
|                                        | Chinese and Other                                                                                                                                                                                                                | 0.46           | (0.21, 0.99) | 0.40          | (0.17, 0.92)                       | 0.27                    | (-1.44, 1.98) |
|                                        | Unclassified                                                                                                                                                                                                                     | 1.62           | (0.99, 2.64) | 0.84          | (0.48, 1.45)                       | 0.41                    | (-2.2, 3.02)  |

| Indicator                      | The proportion of prison population prescribed opioids in the preceding 8 weeks from 31st March |              |                                                                       |                             |                                                                                |              |                                                                  |              |                                                                              |                |
|--------------------------------|-------------------------------------------------------------------------------------------------|--------------|-----------------------------------------------------------------------|-----------------------------|--------------------------------------------------------------------------------|--------------|------------------------------------------------------------------|--------------|------------------------------------------------------------------------------|----------------|
|                                | Univariate: Odds ratios (95% CI)                                                                |              |                                                                       |                             |                                                                                |              |                                                                  |              |                                                                              |                |
|                                | All prison population                                                                           |              |                                                                       | Any mental health diagnosis |                                                                                |              | All prison population AND NO coded diagnosis of neuropathic pain |              |                                                                              |                |
| Group: Prison specific         | Prescribed any opioid in the preceding 8 weeks from 31st March                                  |              | Prescribed any strong opioid in the preceding 8 weeks from 31st March |                             | Prescribed benzodiazepines AND any opioid in preceding 8 weeks from 31st March |              | Prescribed any opioid in the preceding 8 weeks from 31st March   |              | Prescribed pregabalin OR gabapentin in the preceding 8 weeks from 31st March |                |
| Variable                       |                                                                                                 |              |                                                                       |                             |                                                                                |              |                                                                  |              |                                                                              |                |
| <b>Year</b>                    |                                                                                                 |              |                                                                       |                             |                                                                                |              |                                                                  |              |                                                                              |                |
| 2017/18 (comparator)           | 1.0                                                                                             | -            | 1.0                                                                   | -                           | 1.0                                                                            | -            | 1.0                                                              | -            | 1.0                                                                          | -              |
| 2018/19                        | 1.38                                                                                            | (1.29, 1.47) | 1.25                                                                  | (1.17, 1.34)                | 3.07                                                                           | (2.9, 3.25)  | 1.40                                                             | (1.2, 1.63)  | 0.86                                                                         | (0.71, 1.05)   |
| 2019/20                        | 1.40                                                                                            | (1.32, 1.49) | 1.04                                                                  | (0.97, 1.11)                | 1.04                                                                           | (0.97, 1.11) | 1.48                                                             | (1.29, 1.7)  | 0.80                                                                         | (0.66, 0.96)   |
| <b>Prison</b>                  |                                                                                                 |              |                                                                       |                             |                                                                                |              |                                                                  |              |                                                                              |                |
| Prison 1                       | 0.95                                                                                            | (0.84, 1.08) | 1.02                                                                  | (0.9, 1.16)                 | 1.00                                                                           | (0.88, 1.14) | 1.19                                                             | (0.87, 1.62) | 1.66                                                                         | (1.16, 2.38)   |
| Prison 2                       | 0.89                                                                                            | (0.8, 0.98)  | 0.83                                                                  | (0.74, 0.92)                | 0.83                                                                           | (0.74, 0.92) | 1.26                                                             | (0.96, 1.65) | 1.66                                                                         | (1.24, 2.21)   |
| Prison 3                       | 2.06                                                                                            | (1.89, 2.25) | 2.10                                                                  | (1.92, 2.3)                 | 2.15                                                                           | (1.96, 2.35) | 3.55                                                             | (2.63, 4.78) | -                                                                            | -              |
| Prison 4                       | 2.16                                                                                            | (1.98, 2.36) | 2.16                                                                  | (1.98, 2.37)                | 2.18                                                                           | (1.99, 2.39) | 2.61                                                             | (1.87, 3.64) | 1.41                                                                         | (1.02, 1.95)   |
| Prison 5                       | 0.70                                                                                            | (0.58, 0.85) | 0.86                                                                  | (0.71, 1.04)                | 0.82                                                                           | (0.68, 0.99) | 0.74                                                             | (0.43, 1.28) | 2.04                                                                         | (1.32, 3.15)   |
| Prison 6                       | -                                                                                               | -            | -                                                                     | -                           | -                                                                              | -            | -                                                                | -            | -                                                                            | -              |
| Prison 7                       | 2.78                                                                                            | (2.46, 3.13) | 2.99                                                                  | (2.65, 3.39)                | 3.18                                                                           | (2.8, 3.61)  | 1.80                                                             | (1.17, 2.76) | 3.42                                                                         | (2.38, 4.9)    |
| Prison 8                       | 1.70                                                                                            | (1.52, 1.9)  | 1.69                                                                  | (1.5, 1.9)                  | 1.71                                                                           | (1.52, 1.93) | 1.67                                                             | (1.26, 2.2)  | 2.26                                                                         | (1.61, 3.18)   |
| Prison 9                       | 1.97                                                                                            | (1.76, 2.21) | 2.40                                                                  | (2.15, 2.7)                 | 2.46                                                                           | (2.18, 2.76) | 2.32                                                             | (1.57, 3.42) | 3.34                                                                         | (2.41, 4.63)   |
| Prison 10                      | 1.22                                                                                            | (1.11, 1.34) | 0.60                                                                  | (0.53, 0.67)                | 6.80                                                                           | (6.28, 7.37) | 1.18                                                             | (0.88, 1.59) | 1.28                                                                         | (0.95, 1.74)   |
| Prison 11 (comparator)         | 1.0                                                                                             | -            | 1.0                                                                   | -                           | 1.0                                                                            | -            | 1.0                                                              | -            | 1.0                                                                          | -              |
| Prison 12                      | -                                                                                               | -            | -                                                                     | -                           | -                                                                              | -            | -                                                                | -            | -                                                                            | -              |
| Prison 13                      | 0.69                                                                                            | (0.57, 0.83) | 0.94                                                                  | (0.79, 1.12)                | 0.92                                                                           | (0.77, 1.1)  | 0.60                                                             | (0.41, 0.9)  | 2.97                                                                         | (2.02, 4.37)   |
| <b>Prison category</b>         |                                                                                                 |              |                                                                       |                             |                                                                                |              |                                                                  |              |                                                                              |                |
| A (comparator)                 | 1.0                                                                                             | -            | 1.0                                                                   | -                           | 1.0                                                                            | -            | 1.0                                                              | -            | 1.0                                                                          | -              |
| B                              | 0.73                                                                                            | (0.66, 0.8)  | 0.47                                                                  | (0.43, 0.52)                | 1.20                                                                           | (1.1, 1.32)  | 1.15                                                             | (0.91, 1.44) | 0.40                                                                         | (0.32, 0.5)    |
| C                              | 1.30                                                                                            | (1.19, 1.43) | 1.06                                                                  | (0.97, 1.16)                | 1.06                                                                           | (0.97, 1.17) | 2.04                                                             | (1.62, 2.58) | 0.27                                                                         | (0.21, 0.35)   |
| Closed                         | 1.47                                                                                            | (1.32, 1.64) | 1.21                                                                  | (1.09, 1.35)                | 1.24                                                                           | (1.11, 1.38) | 1.60                                                             | (1.26, 2.03) | 0.84                                                                         | (0.63, 1.11)   |
| D                              | 0.14                                                                                            | (0.11, 0.17) | 0.14                                                                  | (0.11, 0.17)                | 0.13                                                                           | (0.11, 0.16) | 0.70                                                             | (0.42, 1.2)  | 0.18                                                                         | (0.12, 0.28)   |
| YOI                            | -                                                                                               | -            | -                                                                     | -                           | -                                                                              | -            | -                                                                | -            | -                                                                            | -              |
| <b>Gender</b>                  |                                                                                                 |              |                                                                       |                             |                                                                                |              |                                                                  |              |                                                                              |                |
| Female (comparator)            | 1.0                                                                                             | -            | 1.0                                                                   | -                           | 1.0                                                                            | -            | 1.0                                                              | -            | 1.0                                                                          | -              |
| Male                           | 0.60                                                                                            | (0.56, 0.65) | 0.55                                                                  | (0.51, 0.6)                 | 0.89                                                                           | (0.81, 0.96) | 0.85                                                             | (0.74, 0.97) | 0.46                                                                         | (0.36, 0.58)   |
| <b>Age - years</b>             |                                                                                                 |              |                                                                       |                             |                                                                                |              |                                                                  |              |                                                                              |                |
| 10 - <20                       | 0.06                                                                                            | (0.03, 0.11) | 0.03                                                                  | (0.01, 0.07)                | 0.35                                                                           | (0.27, 0.44) | 0.17                                                             | (0.02, 1.28) | -                                                                            | -              |
| 20 - <30                       | 0.38                                                                                            | (0.35, 0.4)  | 0.32                                                                  | (0.3, 0.35)                 | 0.49                                                                           | (0.46, 0.53) | 0.43                                                             | (0.36, 0.52) | 0.23                                                                         | (0.17, 0.32)   |
| 30 - <40 (comparator)          | 1.0                                                                                             | -            | 1.0                                                                   | -                           | 1.0                                                                            | -            | 1.0                                                              | -            | 1.0                                                                          | -              |
| 40 - <50                       | 1.37                                                                                            | (1.29, 1.45) | 1.38                                                                  | (1.3, 1.47)                 | 1.27                                                                           | (1.2, 1.35)  | 1.42                                                             | (1.25, 1.62) | 1.75                                                                         | (1.44, 2.12)   |
| 50 - <60                       | 1.02                                                                                            | (0.94, 1.11) | 1.24                                                                  | (1.14, 1.35)                | 1.16                                                                           | (1.07, 1.25) | 1.45                                                             | (1.21, 1.73) | 1.96                                                                         | (1.55, 2.48)   |
| 60 - <70                       | 0.91                                                                                            | (0.79, 1.05) | 1.13                                                                  | (0.99, 1.3)                 | 1.06                                                                           | (0.93, 1.2)  | 0.82                                                             | (0.58, 1.16) | 1.92                                                                         | (1.33, 2.77)   |
| 70 - <80                       | 1.19                                                                                            | (0.95, 1.49) | 1.55                                                                  | (1.25, 1.93)                | 1.34                                                                           | (1.09, 1.65) | 0.89                                                             | (0.45, 1.77) | 0.89                                                                         | (0.37, 2.18)   |
| 80 - <90                       | 1.35                                                                                            | (0.85, 2.13) | 1.50                                                                  | (0.94, 2.4)                 | 1.53                                                                           | (1, 2.35)    | 1.65                                                             | (0.33, 8.23) | 0.84                                                                         | (0.12, 6.02)   |
| 90 - <100                      | -                                                                                               | -            | -                                                                     | -                           | -                                                                              | -            | -                                                                | -            | 17.23                                                                        | (2.06, 143.89) |
| 100 - <110                     | -                                                                                               | -            | -                                                                     | -                           | -                                                                              | -            | -                                                                | -            | -                                                                            | -              |
| <b>Length of Stay (months)</b> |                                                                                                 |              |                                                                       |                             |                                                                                |              |                                                                  |              |                                                                              |                |
| <1                             | 0.58                                                                                            | (0.54, 0.63) | 0.75                                                                  | (0.69, 0.81)                | 0.90                                                                           | (0.85, 0.96) | 0.67                                                             | (0.56, 0.81) | 0.58                                                                         | (0.44, 0.77)   |
| 1-5 (comparator)               | 1.0                                                                                             | -            | 1.0                                                                   | -                           | 1.0                                                                            | -            | 1.0                                                              | -            | 1.0                                                                          | -              |
| 6-12                           | 1.40                                                                                            | (1.31, 1.5)  | 1.39                                                                  | (1.28, 1.5)                 | 1.03                                                                           | (0.96, 1.1)  | 1.58                                                             | (1.36, 1.83) | 1.43                                                                         | (1.14, 1.78)   |
| 12-24                          | 1.48                                                                                            | (1.38, 1.59) | 1.80                                                                  | (1.67, 1.94)                | 1.03                                                                           | (0.96, 1.1)  | 1.89                                                             | (1.61, 2.23) | 1.52                                                                         | (1.2, 1.93)    |
| 24+                            | 1.94                                                                                            | (1.8, 2.1)   | 2.82                                                                  | (2.61, 3.04)                | 1.54                                                                           | (1.43, 1.65) | 1.57                                                             | (1.32, 1.87) | 2.29                                                                         | (1.81, 2.89)   |
| <b>Ethnic Group</b>            |                                                                                                 |              |                                                                       |                             |                                                                                |              |                                                                  |              |                                                                              |                |
| White (comparator)             | 1.0                                                                                             | -            | 1.0                                                                   | -                           | 1.0                                                                            | -            | 1.0                                                              | -            | 1.0                                                                          | -              |
| Mixed                          | 0.42                                                                                            | (0.33, 0.53) | 0.40                                                                  | (0.31, 0.52)                | 0.49                                                                           | (0.4, 0.6)   | 0.67                                                             | (0.42, 1.08) | 0.30                                                                         | (0.11, 0.81)   |
| Asian or Asian British         | 0.24                                                                                            | (0.19, 0.3)  | 0.24                                                                  | (0.19, 0.31)                | 0.54                                                                           | (0.46, 0.62) | 0.25                                                             | (0.13, 0.47) | 0.15                                                                         | (0.06, 0.41)   |
| Black or Black British         | 0.33                                                                                            | (0.25, 0.43) | 0.30                                                                  | (0.23, 0.41)                | 0.39                                                                           | (0.31, 0.48) | 0.63                                                             | (0.37, 1.06) | 0.22                                                                         | (0.07, 0.69)   |
| Chinese and Other              | 0.29                                                                                            | (0.19, 0.45) | 0.32                                                                  | (0.21, 0.49)                | 0.50                                                                           | (0.37, 0.68) | 0.45                                                             | (0.19, 1.04) | 0.66                                                                         | (0.24, 1.76)   |
| Unclassified                   | 0.51                                                                                            | (0.41, 0.64) | 0.41                                                                  | (0.31, 0.52)                | 0.43                                                                           | (0.35, 0.54) | 0.55                                                             | (0.3, 1)     | 0.40                                                                         | (0.16, 0.96)   |



| Indicator                      | The proportion of prison population prescribed opioids in the preceding 8 weeks from 31st March |                                                                |                   |                                                                       |                   |                                                                                |                    |                                                                |                      |                                                                              |  |
|--------------------------------|-------------------------------------------------------------------------------------------------|----------------------------------------------------------------|-------------------|-----------------------------------------------------------------------|-------------------|--------------------------------------------------------------------------------|--------------------|----------------------------------------------------------------|----------------------|------------------------------------------------------------------------------|--|
|                                | Domain: Prison specific                                                                         | Multivariable                                                  |                   |                                                                       |                   |                                                                                |                    |                                                                |                      | All prison population AND no coded diagnosis of neuropathic pain             |  |
|                                |                                                                                                 | All prison population                                          |                   |                                                                       |                   | Any mental health diagnosis                                                    |                    |                                                                |                      |                                                                              |  |
|                                |                                                                                                 | Prescribed any opioid in the preceding 8 weeks from 31st March |                   | Prescribed any strong opioid in the preceding 8 weeks from 31st March |                   | Prescribed benzodiazepines AND any opioid in preceding 8 weeks from 31st March |                    | Prescribed any opioid in the preceding 8 weeks from 31st March |                      | Prescribed pregabalin OR gabapentin in the preceding 8 weeks from 31st March |  |
| Variable                       | OR (95% CI)                                                                                     | Probability of achieving indicator (95% CI)                    | OR (95% CI)       | Probability of achieving indicator (95% CI)                           | OR (95% CI)       | Probability of achieving indicator (95% CI)                                    | OR (95% CI)        | Probability of achieving indicator (95% CI)                    | OR (95% CI)          | Probability of achieving indicator (95% CI)                                  |  |
| <b>Year</b>                    |                                                                                                 |                                                                |                   |                                                                       |                   |                                                                                |                    |                                                                |                      |                                                                              |  |
| 2017/18 (comparator)           | 1.0                                                                                             | 0.1 (0.07, 0.13)                                               | 1.0               | 0.1 (0.05, 0.16)                                                      | 1.0               | 0.1 (0, 0.2)                                                                   | 1.0                | 0.14 (-0.13, 0.41)                                             | 1.0                  | 0.01 (-0.05, 0.08)                                                           |  |
| 2018/19                        | 1.44 (1.35, 1.55)                                                                               | 0.14 (0.1, 0.18)                                               | 1.36 (1.27, 1.46) | 0.13 (0.06, 0.2)                                                      | 3.65 (3.42, 3.9)  | 0.27 (0.01, 0.53)                                                              | 1.4 (1.18, 1.65)   | 0.18 (-0.17, 0.53)                                             | 0.85 (0.69, 1.06)    | 0.01 (-0.05, 0.07)                                                           |  |
| 2019/20                        | 1.47 (1.38, 1.58)                                                                               | 0.14 (0.1, 0.18)                                               | 1.22 (1.14, 1.32) | 0.12 (0.06, 0.19)                                                     | 1.18 (1.1, 1.27)  | 0.12 (0.01, 0.23)                                                              | 1.64 (1.41, 1.91)  | 0.2 (-0.2, 0.6)                                                | 0.89 (0.71, 1.1)     | 0.01 (-0.05, 0.07)                                                           |  |
| <b>Prison</b>                  |                                                                                                 |                                                                |                   |                                                                       |                   |                                                                                |                    |                                                                |                      |                                                                              |  |
| Prison 1                       | 0.58 (0.49, 0.68)                                                                               | 0.09 (0.06, 0.12)                                              | 0.64 (0.55, 0.76) | 0.1 (0.05, 0.16)                                                      | 0.7 (0.59, 0.82)  | 0.11 (0, 0.21)                                                                 | 0.76 (0.54, 1.09)  | 0.13 (-0.13, 0.39)                                             | 1.22 (0.79, 1.9)     | 0.02 (-0.06, 0.09)                                                           |  |
| Prison 2                       | 0.56 (0.5, 0.63)                                                                                | 0.09 (0.06, 0.12)                                              | 0.5 (0.44, 0.56)  | 0.08 (0.04, 0.13)                                                     | 0.51 (0.46, 0.58) | 0.08 (0, 0.16)                                                                 | 0.89 (0.66, 1.2)   | 0.15 (-0.15, 0.44)                                             | 1.2 (0.86, 1.67)     | 0.02 (-0.06, 0.09)                                                           |  |
| Prison 3                       | 1.31 (1.18, 1.45)                                                                               | 0.18 (0.13, 0.24)                                              | 1.36 (1.23, 1.52) | 0.19 (0.09, 0.29)                                                     | 1.5 (1.35, 1.67)  | 0.19 (0.01, 0.38)                                                              | 1.9 (1.36, 2.65)   | 0.26 (-0.26, 0.78)                                             | -                    | -                                                                            |  |
| Prison 4                       | 1.02 (0.91, 1.13)                                                                               | 0.15 (0.1, 0.2)                                                | 1.09 (0.98, 1.22) | 0.16 (0.07, 0.25)                                                     | 1.2 (1.08, 1.34)  | 0.16 (0.01, 0.32)                                                              | 1.64 (1.13, 2.38)  | 0.24 (-0.23, 0.7)                                              | 0.67 (0.46, 1)       | 0.01 (-0.03, 0.05)                                                           |  |
| Prison 5                       | 0.28 (0.22, 0.36)                                                                               | 0.05 (0.03, 0.07)                                              | 0.46 (0.38, 0.57) | 0.08 (0.03, 0.12)                                                     | 0.49 (0.4, 0.61)  | 0.08 (0, 0.16)                                                                 | 0.39 (0.21, 0.71)  | 0.07 (-0.08, 0.22)                                             | 1.03 (0.62, 1.7)     | 0.01 (-0.05, 0.08)                                                           |  |
| Prison 6                       | -                                                                                               | -                                                              | -                 | -                                                                     | -                 | -                                                                              | -                  | -                                                              | -                    | -                                                                            |  |
| Prison 7                       | 1.14 (0.58, 3.43)                                                                               | 0.17 (0.03, 0.3)                                               | 0.84 (0.27, 2.59) | 0.13 (0, 0.25)                                                        | 0.79 (0.28, 2.24) | 0.12 (-0.02, 0.26)                                                             | 3 (0.28, 31.97)    | 0.35 (-0.45, 1.14)                                             | 1.29 (0.06, 29.76)   | 0.02 (-0.07, 0.11)                                                           |  |
| Prison 8                       | 0.76 (0.25, 2.28)                                                                               | 0.12 (0.01, 0.22)                                              | 0.52 (0.17, 1.58) | 0.08 (0, 0.17)                                                        | 0.59 (0.21, 1.67) | 0.09 (-0.02, 0.2)                                                              | 2.48 (0.23, 27.15) | 0.31 (-0.41, 1.03)                                             | 0.83 (0.04, 19.22)   | 0.01 (-0.05, 0.07)                                                           |  |
| Prison 9                       | 0.75 (0.65, 0.87)                                                                               | 0.12 (0.08, 0.15)                                              | 0.84 (0.73, 0.97) | 0.13 (0.06, 0.2)                                                      | 0.94 (0.81, 1.09) | 0.13 (0, 0.26)                                                                 | 1 (0.64, 1.56)     | 0.16 (-0.16, 0.49)                                             | 1.22 (0.78, 1.9)     | 0.02 (-0.06, 0.09)                                                           |  |
| Prison 10                      | 1.01 (0.91, 1.12)                                                                               | 0.15 (0.1, 0.2)                                                | 0.47 (0.41, 0.53) | 0.08 (0.03, 0.12)                                                     | 4.68 (4.28, 5.13) | 0.39 (0.02, 0.77)                                                              | 1.04 (0.75, 1.43)  | 0.17 (-0.17, 0.5)                                              | 1.15 (0.81, 1.64)    | 0.01 (-0.06, 0.09)                                                           |  |
| Prison 11 (comparator)         | 1.0                                                                                             | 0.15 (0.1, 0.19)                                               | 1.0               | 0.15 (0.07, 0.23)                                                     | 1.0               | 0.14 (0.01, 0.28)                                                              | 1.0                | 0.16 (-0.16, 0.49)                                             | 1.0                  | 0.01 (-0.05, 0.07)                                                           |  |
| Prison 12                      | -                                                                                               | -                                                              | -                 | -                                                                     | -                 | -                                                                              | -                  | -                                                              | -                    | -                                                                            |  |
| Prison 13                      | 0.26 (0.21, 0.33)                                                                               | 0.05 (0.03, 0.06)                                              | 0.36 (0.29, 0.45) | 0.06 (0.03, 0.1)                                                      | 0.39 (0.31, 0.48) | 0.06 (0, 0.13)                                                                 | 0.27 (0.17, 0.42)  | 0.05 (-0.05, 0.15)                                             | 1.02 (0.58, 1.77)    | 0.01 (-0.05, 0.08)                                                           |  |
| <b>Gender</b>                  |                                                                                                 |                                                                |                   |                                                                       |                   |                                                                                |                    |                                                                |                      |                                                                              |  |
| Female (comparator)            | 1.0                                                                                             | 0.15 (0.02, 0.28)                                              | 1.0               | 0.18 (0.01, 0.35)                                                     | 1.0               | 0.23 (-0.03, 0.48)                                                             | 1.0                | 0.11 (-0.15, 0.37)                                             | 1.0                  | 0.02 (-0.09, 0.12)                                                           |  |
| Male                           | 0.8 (0.27, 2.41)                                                                                | 0.13 (0.09, 0.17)                                              | 0.55 (0.18, 1.69) | 0.11 (0.05, 0.17)                                                     | 0.6 (0.21, 1.67)  | 0.16 (0.01, 0.31)                                                              | 2.28 (0.21, 24.64) | 0.21 (-0.21, 0.63)                                             | 0.64 (0.03, 14.53)   | 0.01 (-0.05, 0.07)                                                           |  |
| <b>Age - years</b>             |                                                                                                 |                                                                |                   |                                                                       |                   |                                                                                |                    |                                                                |                      |                                                                              |  |
| 10 - <20                       | 0.14 (0.07, 0.27)                                                                               | 0.02 (0.01, 0.04)                                              | 0.06 (0.02, 0.18) | 0.01 (0, 0.02)                                                        | 0.46 (0.34, 0.61) | 0.09 (0, 0.19)                                                                 | 0.24 (0.03, 1.89)  | 0.05 (-0.09, 0.2)                                              | -                    | -                                                                            |  |
| 20 - <30                       | 0.44 (0.41, 0.48)                                                                               | 0.07 (0.05, 0.09)                                              | 0.38 (0.34, 0.41) | 0.06 (0.03, 0.08)                                                     | 0.5 (0.47, 0.54)  | 0.1 (0, 0.2)                                                                   | 0.42 (0.35, 0.51)  | 0.09 (-0.09, 0.26)                                             | 0.25 (0.17, 0.36)    | 0.003 (-0.01, 0.02)                                                          |  |
| 30 - <40 (comparator)          | 1.0                                                                                             | 0.14 (0.1, 0.18)                                               | 1.0               | 0.13 (0.06, 0.2)                                                      | 1.0               | 0.17 (0.01, 0.34)                                                              | 1.0                | 0.18 (-0.18, 0.54)                                             | 1.0                  | 0.01 (-0.05, 0.07)                                                           |  |
| 40 - <50                       | 1.38 (1.29, 1.48)                                                                               | 0.19 (0.13, 0.24)                                              | 1.39 (1.3, 1.49)  | 0.17 (0.08, 0.26)                                                     | 1.33 (1.24, 1.42) | 0.21 (0.01, 0.42)                                                              | 1.4 (1.21, 1.61)   | 0.23 (-0.23, 0.69)                                             | 1.77 (1.43, 2.19)    | 0.02 (-0.08, 0.13)                                                           |  |
| 50 - <60                       | 1.03 (0.94, 1.14)                                                                               | 0.15 (0.1, 0.19)                                               | 1.22 (1.11, 1.34) | 0.15 (0.07, 0.24)                                                     | 1.19 (1.09, 1.31) | 0.2 (0.01, 0.39)                                                               | 1.35 (1.11, 1.63)  | 0.23 (-0.22, 0.67)                                             | 1.7 (1.31, 2.21)     | 0.02 (-0.06, 0.12)                                                           |  |
| 60 - <70                       | 0.83 (0.71, 0.97)                                                                               | 0.12 (0.08, 0.16)                                              | 0.92 (0.79, 1.07) | 0.12 (0.06, 0.19)                                                     | 0.96 (0.83, 1.11) | 0.17 (0.01, 0.33)                                                              | 0.74 (0.51, 1.08)  | 0.14 (-0.14, 0.42)                                             | 1.54 (1.02, 2.31)    | 0.02 (-0.07, 0.11)                                                           |  |
| 70 - <80                       | 0.85 (0.66, 1.08)                                                                               | 0.12 (0.08, 0.17)                                              | 1.06 (0.84, 1.33) | 0.14 (0.06, 0.21)                                                     | 1.07 (0.85, 1.34) | 0.18 (0.01, 0.36)                                                              | 0.47 (0.23, 0.95)  | 0.1 (-0.1, 0.29)                                               | 0.61 (0.22, 1.65)    | 0.01 (-0.03, 0.05)                                                           |  |
| 80 - <90                       | 0.97 (0.6, 1.57)                                                                                | 0.14 (0.07, 0.21)                                              | 1.11 (0.68, 1.82) | 0.14 (0.05, 0.24)                                                     | 1.12 (0.7, 1.78)  | 0.19 (0, 0.38)                                                                 | 0.61 (0.12, 3.12)  | 0.12 (-0.17, 0.41)                                             | 0.81 (0.11, 5.9)     | 0.01 (-0.04, 0.06)                                                           |  |
| 90 - <100                      | -                                                                                               | -                                                              | -                 | -                                                                     | -                 | -                                                                              | -                  | -                                                              | 12.22 (1.41, 105.56) | 0.13 (-0.54, 0.8)                                                            |  |
| 100 - <110                     | -                                                                                               | -                                                              | -                 | -                                                                     | -                 | -                                                                              | -                  | -                                                              | -                    | -                                                                            |  |
| <b>Length of Stay (months)</b> |                                                                                                 |                                                                |                   |                                                                       |                   |                                                                                |                    |                                                                |                      |                                                                              |  |
| <1                             | 0.58 (0.53, 0.64)                                                                               | 0.07 (0.05, 0.09)                                              | 0.79 (0.72, 0.87) | 0.08 (0.04, 0.12)                                                     | 0.85 (0.78, 0.92) | 0.13 (0.01, 0.25)                                                              | 0.66 (0.54, 0.81)  | 0.1 (-0.1, 0.31)                                               | 0.51 (0.37, 0.7)     | 0.006 (-0.02, 0.03)                                                          |  |
| 1-6 (comparator)               | 1.0                                                                                             | 0.11 (0.08, 0.14)                                              | 1.0               | 0.1 (0.05, 0.15)                                                      | 1.0               | 0.14 (0.01, 0.28)                                                              | 1.0                | 0.15 (-0.14, 0.43)                                             | 1.0                  | 0.01 (-0.04, 0.06)                                                           |  |
| 6-12                           | 1.59 (1.47, 1.72)                                                                               | 0.16 (0.12, 0.21)                                              | 1.44 (1.32, 1.57) | 0.13 (0.06, 0.21)                                                     | 1.36 (1.26, 1.47) | 0.18 (0.01, 0.35)                                                              | 1.71 (1.46, 2.02)  | 0.22 (-0.22, 0.66)                                             | 1.77 (1.38, 2.29)    | 0.02 (-0.07, 0.11)                                                           |  |
| 12-24                          | 1.82 (1.67, 1.99)                                                                               | 0.18 (0.13, 0.24)                                              | 1.75 (1.59, 1.91) | 0.16 (0.07, 0.24)                                                     | 1.6 (1.47, 1.75)  | 0.2 (0.01, 0.39)                                                               | 2.01 (1.67, 2.42)  | 0.25 (-0.24, 0.74)                                             | 1.91 (1.43, 2.54)    | 0.02 (-0.08, 0.12)                                                           |  |
| 24+                            | 1.85 (1.67, 2.05)                                                                               | 0.18 (0.13, 0.24)                                              | 1.92 (1.73, 2.13) | 0.17 (0.08, 0.26)                                                     | 1.82 (1.64, 2.02) | 0.22 (0.01, 0.43)                                                              | 1.95 (1.56, 2.43)  | 0.24 (-0.24, 0.72)                                             | 1.91 (1.36, 2.67)    | 0.02 (-0.08, 0.12)                                                           |  |
| <b>Ethnic Group</b>            |                                                                                                 |                                                                |                   |                                                                       |                   |                                                                                |                    |                                                                |                      |                                                                              |  |
| White (comparator)             | 1.0                                                                                             | 0.14 (0.1, 0.18)                                               | 1.0               | 0.13 (0.06, 0.19)                                                     | 1.0               | 0.17 (0.01, 0.33)                                                              | 1.0                | 0.18 (-0.18, 0.54)                                             | 1.0                  | 0.01 (-0.05, 0.08)                                                           |  |
| Mixed                          | 0.55 (0.43, 0.71)                                                                               | 0.08 (0.05, 0.11)                                              | 0.51 (0.39, 0.67) | 0.07 (0.03, 0.11)                                                     | 0.62 (0.5, 0.78)  | 0.12 (0.003, 0.23)                                                             | 0.58 (0.36, 0.95)  | 0.12 (-0.12, 0.36)                                             | 0.33 (0.12, 0.9)     | 0.005 (-0.02, 0.03)                                                          |  |
| Asian or Asian British         | 0.32 (0.25, 0.4)                                                                                | 0.05 (0.03, 0.07)                                              | 0.34 (0.26, 0.43) | 0.05 (0.02, 0.08)                                                     | 0.56 (0.48, 0.65) | 0.11 (0.004, 0.21)                                                             | 0.25 (0.13, 0.48)  | 0.06 (-0.06, 0.17)                                             | 0.18 (0.07, 0.48)    | 0.003 (-0.01, 0.02)                                                          |  |
| Black or Black British         | 0.41 (0.31, 0.54)                                                                               | 0.06 (0.04, 0.09)                                              | 0.37 (0.28, 0.5)  | 0.05 (0.02, 0.08)                                                     | 0.47 (0.37, 0.6)  | 0.09 (0.002, 0.19)                                                             | 0.58 (0.33, 1.03)  | 0.12 (-0.12, 0.36)                                             | 0.22 (0.07, 0.69)    | 0.003 (-0.01, 0.02)                                                          |  |
| Chinese and Other              | 0.31 (0.2, 0.48)                                                                                | 0.05 (0.02, 0.07)                                              | 0.33 (0.21, 0.51) | 0.05 (0.02, 0.08)                                                     | 0.48 (0.35, 0.66) | 0.1 (0.001, 0.19)                                                              | 0.48 (0.2, 1.12)   | 0.1 (-0.11, 0.31)                                              | 0.61 (0.23, 1.66)    | 0.009 (-0.03, 0.05)                                                          |  |
| Unclassified                   | 0.69 (0.54, 0.87)                                                                               | 0.1 (0.06, 0.13)                                               | 0.51 (0.39, 0.67) | 0.07 (0.03, 0.11)                                                     | 0.59 (0.47, 0.74) | 0.11 (0.003, 0.22)                                                             | 0.82 (0.44, 1.54)  | 0.16 (-0.16, 0.48)                                             | 0.43 (0.17, 1.08)    | 0.006 (-0.02, 0.04)                                                          |  |

| Indicator                      | <i>The proportion of new receptions to prison who have been asked for consent to transfer medical records from GP to prison healthcare</i> |                |               |               |                                    |                         |  |
|--------------------------------|--------------------------------------------------------------------------------------------------------------------------------------------|----------------|---------------|---------------|------------------------------------|-------------------------|--|
|                                | Group: Prison specific                                                                                                                     |                |               |               |                                    |                         |  |
| Variable                       | Univariate                                                                                                                                 |                | Multivariable |               |                                    |                         |  |
|                                | Odds Ratio (OR) of achieving indicator                                                                                                     | (95% CI) of OR | OR            | (95% CI)      | Probability of achieving indicator | (95% CI) of probability |  |
| <b>Year</b>                    |                                                                                                                                            |                |               |               |                                    |                         |  |
| 2017/18 (comparator)           | 1.0                                                                                                                                        | -              | 1.0           | -             | 0.52                               | (-0.02, 1.07)           |  |
| 2018/19                        | 2.55                                                                                                                                       | (2.43, 2.68)   | 5.04          | (4.64, 5.47)  | 0.72                               | (-0.03, 1.47)           |  |
| 2019/20                        | 2.05                                                                                                                                       | (1.96, 2.15)   | 4.28          | (3.96, 4.62)  | 0.70                               | (-0.03, 1.44)           |  |
| <b>Prison</b>                  |                                                                                                                                            |                |               |               |                                    |                         |  |
| Prison 1                       | 0.16                                                                                                                                       | (0.14, 0.17)   | 0.12          | (0.11, 0.14)  | 0.54                               | (-0.02, 1.11)           |  |
| Prison 2                       | 0.01                                                                                                                                       | (0.01, 0.02)   | 0.01          | (0.01, 0.01)  | 0.11                               | (-0.01, 0.23)           |  |
| Prison 3                       | 3.57                                                                                                                                       | (3.18, 4.01)   | 2.09          | (1.78, 2.44)  | 0.93                               | (-0.04, 1.91)           |  |
| Prison 4                       | 2.34                                                                                                                                       | (2.08, 2.63)   | 1.68          | (1.43, 1.97)  | 0.92                               | (-0.04, 1.88)           |  |
| Prison 5                       | 0.50                                                                                                                                       | (0.44, 0.58)   | 0.17          | (0.14, 0.21)  | 0.61                               | (-0.03, 1.25)           |  |
| Prison 6                       | 0.99                                                                                                                                       | (0.88, 1.12)   | 0.50          | (0.42, 0.59)  | 0.79                               | (-0.03, 1.62)           |  |
| Prison 7                       | 2.03                                                                                                                                       | (1.71, 2.41)   | 0.20          | (0.08, 0.51)  | 0.64                               | (-0.05, 1.34)           |  |
| Prison 8                       | 2.20                                                                                                                                       | (1.93, 2.52)   | 0.09          | (0.03, 0.21)  | 0.47                               | (-0.05, 0.99)           |  |
| Prison 9                       | 1.08                                                                                                                                       | (0.89, 1.31)   | 0.55          | (0.43, 0.71)  | 0.81                               | (-0.04, 1.65)           |  |
| Prison 10                      | 0.34                                                                                                                                       | (0.32, 0.36)   | 0.18          | (0.16, 0.19)  | 0.61                               | (-0.03, 1.25)           |  |
| Prison 11 (comparator)         | 1.0                                                                                                                                        | -              | 1.0           | -             | 0.88                               | (-0.04, 1.79)           |  |
| Prison 12                      | 2.93                                                                                                                                       | (2.39, 3.58)   | 2.36          | (1.78, 3.13)  | 0.94                               | (-0.04, 1.92)           |  |
| Prison 13                      | 0.48                                                                                                                                       | (0.4, 0.58)    | 0.25          | (0.19, 0.32)  | 0.68                               | (-0.03, 1.39)           |  |
| <b>Prison category</b>         |                                                                                                                                            |                |               |               |                                    |                         |  |
| A (comparator)                 | 1.0                                                                                                                                        | -              |               |               |                                    |                         |  |
| B                              | 0.38                                                                                                                                       | (0.33, 0.43)   |               |               |                                    |                         |  |
| C                              | 1.43                                                                                                                                       | (1.26, 1.64)   |               |               |                                    |                         |  |
| Closed                         | 2.86                                                                                                                                       | (2.44, 3.35)   |               |               |                                    |                         |  |
| D                              | 1.05                                                                                                                                       | (0.91, 1.22)   |               |               |                                    |                         |  |
| YOI                            | 3.88                                                                                                                                       | (3.08, 4.89)   |               |               |                                    |                         |  |
| <b>Gender</b>                  |                                                                                                                                            |                |               |               |                                    |                         |  |
| Female (comparator)            | 1.0                                                                                                                                        | -              | 1.0           | -             | 0.88                               | (-0.04, 1.8)            |  |
| Male                           | 0.17                                                                                                                                       | (0.15, 0.19)   | 0.1           | (0.02, 0.14)  | 0.61                               | (-0.03, 1.25)           |  |
| <b>Age - years</b>             |                                                                                                                                            |                |               |               |                                    |                         |  |
| 10 - <20                       | 2.10                                                                                                                                       | (1.81, 2.45)   | 0.91          | (0.72, 1.16)  | 0.64                               | (-0.03, 1.32)           |  |
| 20 - <30                       | 0.96                                                                                                                                       | (0.92, 1.01)   | 0.96          | (0.88, 1.03)  | 0.65                               | (-0.03, 1.33)           |  |
| 30 - <40 (comparator)          | 1.0                                                                                                                                        | -              | 1.0           | -             | 0.65                               | (-0.03, 1.34)           |  |
| 40 - <50                       | 1.00                                                                                                                                       | (0.95, 1.06)   | 1.03          | (0.94, 1.13)  | 0.66                               | (-0.03, 1.35)           |  |
| 50 - <60                       | 0.88                                                                                                                                       | (0.82, 0.95)   | 0.86          | (0.76, 0.97)  | 0.64                               | (-0.03, 1.3)            |  |
| 60 - <70                       | 0.81                                                                                                                                       | (0.71, 0.92)   | 0.72          | (0.58, 0.89)  | 0.62                               | (-0.03, 1.26)           |  |
| 70 - <80                       | 1.07                                                                                                                                       | (0.82, 1.4)    | 0.70          | (0.46, 1.05)  | 0.61                               | (-0.03, 1.25)           |  |
| 80 - <90                       | 0.49                                                                                                                                       | (0.3, 0.8)     | 0.62          | (0.28, 1.36)  | 0.60                               | (-0.03, 1.23)           |  |
| 90 - <100                      | 0.22                                                                                                                                       | (0.02, 2.55)   | 0.72          | (0.01, 65.55) | 0.62                               | (-0.23, 1.46)           |  |
| 100 - <110                     | -                                                                                                                                          | -              | -             | -             | -                                  | -                       |  |
| <b>Length of Stay (months)</b> |                                                                                                                                            |                |               |               |                                    |                         |  |
| <1                             | 0.71                                                                                                                                       | (0.68, 0.75)   | 0.77          | (0.71, 0.83)  | 0.62                               | (-0.03, 1.27)           |  |
| 1-<6 (comparator)              | 1.0                                                                                                                                        | -              | 1.0           | -             | 0.65                               | (-0.03, 1.33)           |  |
| 6-<12                          | 1.41                                                                                                                                       | (1.33, 1.5)    | 1.22          | (1.11, 1.34)  | 0.67                               | (-0.03, 1.37)           |  |
| 12-<24                         | 1.97                                                                                                                                       | (1.81, 2.14)   | 1.43          | (1.25, 1.63)  | 0.69                               | (-0.03, 1.41)           |  |
| 24+                            | 2.96                                                                                                                                       | (2.51, 3.5)    | 1.85          | (1.47, 2.31)  | 0.72                               | (-0.03, 1.46)           |  |
| <b>Ethnic Group</b>            |                                                                                                                                            |                |               |               |                                    |                         |  |
| White (comparator)             | 1.0                                                                                                                                        | -              | 1.0           | -             | 0.65                               | (-0.03, 1.34)           |  |
| Mixed                          | 0.81                                                                                                                                       | (0.7, 0.95)    | 0.80          | (0.65, 0.99)  | 0.63                               | (-0.03, 1.29)           |  |
| Asian or Asian British         | 0.84                                                                                                                                       | (0.75, 0.94)   | 0.80          | (0.69, 0.92)  | 0.63                               | (-0.03, 1.29)           |  |
| Black or Black British         | 0.69                                                                                                                                       | (0.59, 0.8)    | 0.75          | (0.61, 0.93)  | 0.62                               | (-0.03, 1.27)           |  |
| Chinese and Other              | 0.59                                                                                                                                       | (0.48, 0.73)   | 0.70          | (0.52, 0.96)  | 0.61                               | (-0.03, 1.26)           |  |
| Unclassified                   | 1.48                                                                                                                                       | (1.24, 1.76)   | 0.71          | (0.57, 0.87)  | 0.61                               | (-0.03, 1.26)           |  |

The proportion of new receptions to prison with a code for a second-stage health assessment in the past 12 months, plus clinical codes for in possession risk assessment and medicines reconciliation added in the week before the second-stage assessment

| Indicator                      | Both Medicines Reconciliation (MR) and In-Possession (IP) assessment within 7 days |           | Univariate: Odds Ratio (95 %CI)                            |        |                                                            |         |                    |
|--------------------------------|------------------------------------------------------------------------------------|-----------|------------------------------------------------------------|--------|------------------------------------------------------------|---------|--------------------|
|                                | Variable                                                                           |           | Had MR during stay, but did not satisfy both within 7 days |        | Had IP during stay, but did not satisfy both within 7 days |         |                    |
| <b>Group: Prison specific</b>  |                                                                                    |           |                                                            |        |                                                            |         |                    |
| <b>Year</b>                    |                                                                                    |           |                                                            |        |                                                            |         |                    |
|                                | 2019/20 only                                                                       |           |                                                            |        |                                                            |         |                    |
| <b>Prison</b>                  |                                                                                    |           |                                                            |        |                                                            |         |                    |
|                                | Prison 1                                                                           | 10,036.80 | (1932.51, 52127.7)                                         | 1.58   | (0.14, 17.48)                                              | 0.00    | (0, 0)             |
|                                | Prison 2                                                                           | 290.38    | (116.89, 721.33)                                           | 53.93  | (7.49, 388.4)                                              | 0.00    | (0, 0.01)          |
|                                | Prison 3                                                                           | 1.19      | (0.45, 3.16)                                               | 4.51   | (0.59, 34.41)                                              | 0.72    | (0.274, 1.87)      |
|                                | Prison 4                                                                           | -         | -                                                          | -      | -                                                          | -       | -                  |
|                                | Prison 5                                                                           | 1.33      | (0.38, 4.66)                                               | -      | -                                                          | 0.752   | (0.215, 2.64)      |
|                                | Prison 6                                                                           | 108.06    | (43.36, 269.31)                                            | 58.45  | (8.04, 424.99)                                             | 0.0093  | (0.00371, 0.0231)  |
|                                | Prison 7                                                                           | -         | -                                                          | 3.90   | (0.4, 37.67)                                               | -       | -                  |
|                                | Prison 8                                                                           | 91.37     | (36.67, 227.68)                                            | 173.38 | (24.04, 1250.28)                                           | 0.01    | (0, 0.03)          |
|                                | Prison 9                                                                           | 2.27      | (0.8, 6.45)                                                | 11.30  | (1.44, 88.81)                                              | 0.44090 | (0.15499, 1.25426) |
|                                | Prison 10                                                                          | 16,063.80 | (3096.28, 83340.43)                                        | 0.99   | (0.09, 10.92)                                              | 0.00    | (0, 0)             |
|                                | Prison 11 (comparator)                                                             | 1.0       | -                                                          | 1.0    | -                                                          | 1.0     | -                  |
|                                | Prison 12                                                                          | 0.50      | (0.12, 2.09)                                               | 2.15   | (0.19, 23.88)                                              | 2.02    | (0.48, 8.53)       |
|                                | Prison 13                                                                          | 84.68     | (33.82, 212.02)                                            | 11.79  | (1.5, 92.72)                                               | 0.01    | (0, 0.03)          |
| <b>Prison category</b>         |                                                                                    |           |                                                            |        |                                                            |         |                    |
|                                | A (comparator)                                                                     | 1.0       | -                                                          | 1.0    | -                                                          | 1.0     | -                  |
|                                | B                                                                                  | 5.91      | (4.81, 7.25)                                               | 1.84   | (1.13, 3)                                                  | 0.17    | (0.14, 0.21)       |
|                                | C                                                                                  | 0.43      | (0.35, 0.52)                                               | 0.18   | (0.09, 0.35)                                               | 2.32    | (1.9, 2.84)        |
|                                | Closed                                                                             | 1.24      | (0.98, 1.58)                                               | 7.26   | (4.45, 11.83)                                              | 0.80    | (0.63, 1.02)       |
|                                | D                                                                                  | 1.70      | (1.33, 2.16)                                               | 3.11   | (1.84, 5.27)                                               | 0.59    | (0.46, 0.75)       |
|                                | YOI                                                                                | 0.02      | (0.01, 0.06)                                               | 0.19   | (0.04, 0.8)                                                | 49.41   | (15.64, 156.1)     |
| <b>Gender</b>                  |                                                                                    |           |                                                            |        |                                                            |         |                    |
|                                | Female (comparator)                                                                | 1.0       | -                                                          | 1.0    | -                                                          | 1.0     | -                  |
|                                | Male                                                                               | 0.99      | (0.83, 1.18)                                               | 0.14   | (0.11, 0.18)                                               | 1.01    | (0.85, 1.2)        |
| <b>Age - years</b>             |                                                                                    |           |                                                            |        |                                                            |         |                    |
|                                | 10 - <20                                                                           | 0.55      | (0.36, 0.84)                                               | 1.01   | (0.44, 2.35)                                               | 1.82    | (1.19, 2.78)       |
|                                | 20 - <30                                                                           | 1.02      | (0.9, 1.16)                                                | 0.85   | (0.63, 1.14)                                               | 0.98    | (0.86, 1.11)       |
|                                | 30 - <40 (comparator)                                                              | 1.0       | -                                                          | 1.0    | -                                                          | 1.0     | -                  |
|                                | 40 - <50                                                                           | 0.99      | (0.86, 1.14)                                               | 1.16   | (0.86, 1.57)                                               | 1.01    | (0.88, 1.17)       |
|                                | 50 - <60                                                                           | 1.01      | (0.84, 1.23)                                               | 1.31   | (0.89, 1.94)                                               | 0.99    | (0.82, 1.2)        |
|                                | 60 - <70                                                                           | 0.59      | (0.42, 0.82)                                               | 0.83   | (0.4, 1.72)                                                | 1.71    | (1.22, 2.38)       |
|                                | 70 - <80                                                                           | 0.65      | (0.35, 1.22)                                               | 1.69   | (0.6, 4.78)                                                | 1.54    | (0.82, 2.89)       |
|                                | 80 - <90                                                                           | 2.38      | (0.67, 8.44)                                               | -      | -                                                          | 0.42    | (0.12, 1.5)        |
|                                | 90 - <100                                                                          | -         | -                                                          | -      | -                                                          | -       | -                  |
|                                | 100 - <110                                                                         | -         | -                                                          | -      | -                                                          | -       | -                  |
| <b>Length of Stay (months)</b> |                                                                                    |           |                                                            |        |                                                            |         |                    |
|                                | <1                                                                                 | 1.17      | (1, 1.38)                                                  | 0.65   | (0.45, 0.94)                                               | 0.85    | (0.73, 1.01)       |
|                                | 1-<6 (comparator)                                                                  | 1.0       | -                                                          | 1.0    | -                                                          | 1.0     | -                  |
|                                | 6-<12                                                                              | 0.99      | (0.86, 1.13)                                               | 0.40   | (0.29, 0.57)                                               | 1.01    | (0.89, 1.16)       |
|                                | 12-<24                                                                             | 0.65      | (0.56, 0.75)                                               | 0.54   | (0.39, 0.75)                                               | 1.54    | (1.33, 1.79)       |
|                                | 24+                                                                                | 0.48      | (0.39, 0.6)                                                | 0.81   | (0.54, 1.22)                                               | 2.09    | (1.67, 2.6)        |
| <b>Ethnic Group</b>            |                                                                                    |           |                                                            |        |                                                            |         |                    |
|                                | White (comparator)                                                                 | 1.0       | -                                                          | 1.0    | -                                                          | 1.0     | -                  |
|                                | Mixed                                                                              | 1.68      | (1.2, 2.36)                                                | 1.73   | (0.96, 3.1)                                                | 0.58    | (0.41, 0.81)       |
|                                | Asian or Asian British                                                             | 2.06      | (1.59, 2.68)                                               | 0.72   | (0.38, 1.38)                                               | 0.49    | (0.37, 0.63)       |
|                                | Black or Black British                                                             | 1.20      | (0.86, 1.66)                                               | 0.58   | (0.23, 1.42)                                               | 0.84    | (0.6, 1.16)        |
|                                | Chinese and Other                                                                  | 3.63      | (2.11, 6.23)                                               | 0.55   | (0.13, 2.26)                                               | 0.26    | (0.15, 0.44)       |
|                                | Unclassified                                                                       | 1.57      | (0.99, 2.48)                                               | 0.71   | (0.22, 2.26)                                               | 0.64    | (0.4, 1.01)        |

| Indicator                      | <i>The proportion of new receptions to prison with a code for a second-stage health assessment in the past 12 months, plus clinical codes for in possession risk assessment and medicines reconciliation added in the week before the second-stage assessment</i> |                                                                                    |                                             |                                                            |                                             |                                                            |                                             |
|--------------------------------|-------------------------------------------------------------------------------------------------------------------------------------------------------------------------------------------------------------------------------------------------------------------|------------------------------------------------------------------------------------|---------------------------------------------|------------------------------------------------------------|---------------------------------------------|------------------------------------------------------------|---------------------------------------------|
|                                | Domain: Prison specific                                                                                                                                                                                                                                           |                                                                                    | Multivariable                               |                                                            |                                             |                                                            |                                             |
|                                | Variable                                                                                                                                                                                                                                                          | Both Medicines Reconciliation (MR) and In-Possession (IP) assessment within 7 days |                                             | Had MR during stay, but did not satisfy both within 7 days |                                             | Had IP during stay, but did not satisfy both within 7 days |                                             |
|                                |                                                                                                                                                                                                                                                                   | OR (95% CI)                                                                        | Probability of achieving indicator (95% CI) | OR (95% CI)                                                | Probability of achieving indicator (95% CI) | OR (95% CI)                                                | Probability of achieving indicator (95% CI) |
| <b>Year</b>                    | 2019/20 only                                                                                                                                                                                                                                                      |                                                                                    |                                             |                                                            |                                             |                                                            |                                             |
| <b>Prison</b>                  | Prison 1                                                                                                                                                                                                                                                          | 9724.53 (35.71, 2648315.74)                                                        | 0.99 (0.99, 1)                              | 1.54 (0.14, 17.11)                                         | 0.005 (-0.004, 0.013)                       | 0.0001 (0.0000004, 0.03)                                   | 0.005 (-0.003, 0.01)                        |
|                                | Prison 2                                                                                                                                                                                                                                                          | 267.54 (1.17, 61384.49)                                                            | 0.84 (0.74, 0.95)                           | 52.86 (7.3, 382.56)                                        | 0.139 (0.006, 0.271)                        | 0.004 (0.00002, 0.9)                                       | 0.16 (0.05, 0.26)                           |
|                                | Prison 3                                                                                                                                                                                                                                                          | 0.86 (0, 201.45)                                                                   | 0.02 (0.01, 0.04)                           | 4.93 (0.64, 38)                                            | 0.015 (-0.003, 0.034)                       | 0.97 (0.004, 235.07)                                       | 0.97 (0.96, 0.99)                           |
|                                | Prison 4                                                                                                                                                                                                                                                          | -                                                                                  | -                                           | -                                                          | -                                           | -                                                          | -                                           |
|                                | Prison 5                                                                                                                                                                                                                                                          | 1.24 (0, 309.4)                                                                    | 0.03 (0, 0.06)                              | -                                                          | -                                           | 0.8 (0.003, 209.08)                                        | 0.97 (0.94, 1)                              |
|                                | Prison 6                                                                                                                                                                                                                                                          | 91.96 (0.4, 21160.98)                                                              | 0.66 (0.49, 0.82)                           | 90.55 (12.19, 672.89)                                      | 0.212 (0.02, 0.405)                         | 0.01 (0.00005, 2.6)                                        | 0.34 (0.18, 0.51)                           |
|                                | Prison 7                                                                                                                                                                                                                                                          | -                                                                                  | 0.02 (-0.09, 0.14)                          | 5.03 (0, 109922.9)                                         | 0.016 (-0.118, 0.15)                        | -                                                          | 0.98 (0.86, 1.09)                           |
|                                | Prison 8                                                                                                                                                                                                                                                          | 98.17 (38.68, 249.11)                                                              | 0.67 (-0.31, 1.65)                          | 221.59 (0.01, 4859750.31)                                  | 0.385 (-1.501, 2.27)                        | 0.01 (0.004, 0.03)                                         | 0.33 (-0.66, 1.32)                          |
|                                | Prison 9                                                                                                                                                                                                                                                          | 1.98 (0.01, 452.5)                                                                 | 0.05 (0.01, 0.08)                           | 15.11 (1.89, 121.16)                                       | 0.045 (-0.008, 0.099)                       | 0.5 (0.002, 118.81)                                        | 0.95 (0.92, 0.99)                           |
|                                | Prison 10                                                                                                                                                                                                                                                         | 14745.1 (54.91, 3959521.92)                                                        | 1 (0.99, 1)                                 | 0.86 (0.08, 9.58)                                          | 0.003 (-0.002, 0.007)                       | 0.00007 (0.0000002, 0.02)                                  | 0.004 (-0.002, 0.01)                        |
|                                | Prison 11 (comparator)                                                                                                                                                                                                                                            | 1.0                                                                                | -                                           | 1.0                                                        | 0.003 (-0.004, 0.01)                        | 1.0                                                        | -                                           |
|                                | Prison 12                                                                                                                                                                                                                                                         | 0.45 (0, 124.06)                                                                   | 0.01 (-0.01, 0.03)                          | -                                                          | -                                           | 2.23 (0.008, 633.11)                                       | 0.99 (0.97, 1.01)                           |
|                                | Prison 13                                                                                                                                                                                                                                                         | 80.87 (0.35, 18582.79)                                                             | 0.63 (0.46, 0.8)                            | 19.16 (2.4, 153.18)                                        | 0.057 (-0.01, 0.123)                        | 0.01 (0.00005, 2.97)                                       | 0.37 (0.2, 0.54)                            |
| <b>Prison category</b>         | A (comparator)                                                                                                                                                                                                                                                    |                                                                                    |                                             |                                                            |                                             |                                                            |                                             |
|                                | B                                                                                                                                                                                                                                                                 |                                                                                    |                                             |                                                            |                                             |                                                            |                                             |
|                                | C                                                                                                                                                                                                                                                                 |                                                                                    |                                             |                                                            |                                             |                                                            |                                             |
|                                | Closed                                                                                                                                                                                                                                                            |                                                                                    |                                             |                                                            |                                             |                                                            |                                             |
|                                | D                                                                                                                                                                                                                                                                 |                                                                                    |                                             |                                                            |                                             |                                                            |                                             |
|                                | YOI                                                                                                                                                                                                                                                               |                                                                                    |                                             |                                                            |                                             |                                                            |                                             |
| <b>Gender</b>                  | Female (comparator)                                                                                                                                                                                                                                               | 1.0                                                                                | 0.5 (0.17, 0.83)                            | 1.0                                                        | 0.06 (-0.25, 0.38)                          | 1.0                                                        | 0.5 (0.17, 0.84)                            |
|                                | Male                                                                                                                                                                                                                                                              | 1.21 (0.01, 274.94)                                                                | 0.51 (0.43, 0.6)                            | 1.26 (0, 22564.91)                                         | 0.07 (-0.09, 0.24)                          | 0.83 (0.004, 197.17)                                       | 0.49 (0.4, 0.57)                            |
| <b>Age - years</b>             | 10 - <20                                                                                                                                                                                                                                                          | 0.53 (0.12, 2.46)                                                                  | 0.46 (0.34, 0.59)                           | 2.83 (0.58, 13.68)                                         | 0.14 (0, 0.27)                              | 1.88 (0.41, 8.64)                                          | 0.54 (0.41, 0.66)                           |
|                                | 20 - <30                                                                                                                                                                                                                                                          | 0.94 (0.7, 1.28)                                                                   | 0.51 (0.49, 0.52)                           | 1.19 (0.84, 1.68)                                          | 0.08 (0.06, 0.09)                           | 1.06 (0.78, 1.43)                                          | 0.49 (0.48, 0.51)                           |
|                                | 30 - <40 (comparator)                                                                                                                                                                                                                                             | 1.0                                                                                | 0.51 (0.5, 0.52)                            | 1.0                                                        | 0.07 (0.05, 0.08)                           | 1.0                                                        | 0.49 (0.47, 0.5)                            |
|                                | 40 - <50                                                                                                                                                                                                                                                          | 0.98 (0.73, 1.33)                                                                  | 0.51 (0.49, 0.53)                           | 1.07 (0.75, 1.52)                                          | 0.07 (0.05, 0.08)                           | 1.03 (0.76, 1.39)                                          | 0.49 (0.47, 0.51)                           |
|                                | 50 - <60                                                                                                                                                                                                                                                          | 0.99 (0.67, 1.45)                                                                  | 0.51 (0.48, 0.53)                           | 1.07 (0.68, 1.7)                                           | 0.07 (0.05, 0.09)                           | 1.02 (0.69, 1.49)                                          | 0.49 (0.46, 0.52)                           |
|                                | 60 - <70                                                                                                                                                                                                                                                          | 0.7 (0.38, 1.32)                                                                   | 0.48 (0.44, 0.53)                           | 0.87 (0.36, 2.15)                                          | 0.06 (0.02, 0.1)                            | 1.43 (0.76, 2.66)                                          | 0.52 (0.47, 0.56)                           |
|                                | 70 - <80                                                                                                                                                                                                                                                          | 1.52 (0.36, 6.44)                                                                  | 0.54 (0.44, 0.64)                           | 2.35 (0.68, 8.14)                                          | 0.12 (0.02, 0.22)                           | 0.67 (0.16, 2.78)                                          | 0.46 (0.36, 0.56)                           |
|                                | 80 - <90                                                                                                                                                                                                                                                          | -                                                                                  | -                                           | -                                                          | -                                           | -                                                          | -                                           |
|                                | 90 - <100                                                                                                                                                                                                                                                         | -                                                                                  | -                                           | -                                                          | -                                           | -                                                          | -                                           |
|                                | 100 - <110                                                                                                                                                                                                                                                        | -                                                                                  | -                                           | -                                                          | -                                           | -                                                          | -                                           |
| <b>Length of Stay (months)</b> | <1                                                                                                                                                                                                                                                                | 3.02 (1.86, 4.89)                                                                  | 0.55 (0.53, 0.58)                           | 0.66 (0.43, 1.02)                                          | 0.08 (0.06, 0.1)                            | 0.35 (0.21, 0.56)                                          | 0.45 (0.42, 0.47)                           |
|                                | 1-6 (comparator)                                                                                                                                                                                                                                                  | 1.0                                                                                | 0.47 (0.46, 0.49)                           | 1.0                                                        | 0.11 (0.09, 0.12)                           | 1.0                                                        | 0.52 (0.51, 0.54)                           |
|                                | 6-12                                                                                                                                                                                                                                                              | 3.17 (2.26, 4.44)                                                                  | 0.56 (0.54, 0.57)                           | 0.27 (0.18, 0.4)                                           | 0.04 (0.03, 0.05)                           | 0.33 (0.23, 0.46)                                          | 0.44 (0.43, 0.46)                           |
|                                | 12-24                                                                                                                                                                                                                                                             | 1.04 (0.76, 1.43)                                                                  | 0.48 (0.46, 0.5)                            | 0.41 (0.28, 0.62)                                          | 0.05 (0.04, 0.07)                           | 0.97 (0.71, 1.33)                                          | 0.52 (0.5, 0.54)                            |
|                                | 24+                                                                                                                                                                                                                                                               | 1.54 (1.01, 2.33)                                                                  | 0.51 (0.48, 0.53)                           | 0.51 (0.31, 0.83)                                          | 0.06 (0.04, 0.09)                           | 0.67 (0.44, 1.01)                                          | 0.49 (0.47, 0.52)                           |
| <b>Ethnic Group</b>            | White (comparator)                                                                                                                                                                                                                                                | 1.0                                                                                | 0.51 (0.5, 0.52)                            | 1.0                                                        | 0.07 (0.07, 0.08)                           | 1.0                                                        | 0.49 (0.48, 0.5)                            |
|                                | Mixed                                                                                                                                                                                                                                                             | 0.89 (0.5, 1.59)                                                                   | 0.5 (0.45, 0.54)                            | 1.22 (0.63, 2.36)                                          | 0.09 (0.05, 0.13)                           | 1.02 (0.57, 1.83)                                          | 0.5 (0.45, 0.54)                            |
|                                | Asian or Asian British                                                                                                                                                                                                                                            | 1.01 (0.64, 1.59)                                                                  | 0.51 (0.47, 0.54)                           | 0.59 (0.29, 1.2)                                           | 0.05 (0.02, 0.08)                           | 0.98 (0.63, 1.54)                                          | 0.49 (0.46, 0.52)                           |
|                                | Black or Black British                                                                                                                                                                                                                                            | 1.17 (0.65, 2.11)                                                                  | 0.52 (0.48, 0.56)                           | 0.52 (0.21, 1.34)                                          | 0.04 (0.01, 0.08)                           | 0.85 (0.47, 1.53)                                          | 0.48 (0.44, 0.52)                           |
|                                | Chinese and Other                                                                                                                                                                                                                                                 | 2.33 (0.94, 5.81)                                                                  | 0.56 (0.51, 0.62)                           | 0.25 (0.06, 1.12)                                          | 0.02 (-0.01, 0.05)                          | 0.34 (0.13, 0.89)                                          | 0.42 (0.36, 0.48)                           |
|                                | Unclassified                                                                                                                                                                                                                                                      | 2.11 (0.77, 5.8)                                                                   | 0.56 (0.49, 0.62)                           | 0.8 (0.22, 2.86)                                           | 0.06 (0, 0.12)                              | 0.48 (0.18, 1.3)                                           | 0.44 (0.38, 0.51)                           |

## Supplementary section 4. Comparisons with achievement in community settings

| Study indicator                                                                                                                                                                                                                                                                                                           | Study achievement 2019-20 (%)                                                                     | Community indicator <sup>a</sup>                                                                                                                                                                                                                                                                                   | Community achievement (England) (%) |
|---------------------------------------------------------------------------------------------------------------------------------------------------------------------------------------------------------------------------------------------------------------------------------------------------------------------------|---------------------------------------------------------------------------------------------------|--------------------------------------------------------------------------------------------------------------------------------------------------------------------------------------------------------------------------------------------------------------------------------------------------------------------|-------------------------------------|
| <b>Long-term conditions</b>                                                                                                                                                                                                                                                                                               |                                                                                                   |                                                                                                                                                                                                                                                                                                                    |                                     |
| Blood pressure control in diabetes: proportion of the prison population with diabetes whose most recent blood pressure was $\leq$ 140/80 mmHg in the last 12 months                                                                                                                                                       | 261 of 770 eligible people (33.9%)                                                                | Quality and Outcomes Framework, 2019-20: The percentage of patients with diabetes, on the register, without moderate or severe frailty in whom the last blood pressure reading (measured in the preceding 12 months) is 140/80 mmHg or less                                                                        | 68.01%(1)                           |
| Processes of care for diabetes: proportion of the prison population with diabetes who have had $\geq$ five of these measurements in the preceding 12 months: body mass index, blood pressure, record of smoking status, foot examination, urine albumin: creatinine ratio, blood tests for HbA1c, cholesterol, creatinine | 426 of 770 eligible people (55.3%)                                                                | Quality and Outcomes Framework, 2019-20: The percentage of patients with diabetes, on the register, with a record of a foot examination and risk classification within the preceding 12 months                                                                                                                     | 78.04%(1)                           |
| Glycaemic control for diabetes: proportion of the prison population with diabetes and without moderate or severe frailty, whose most recent HbA1c was $\leq$ 58 mmol/mol in the last 12 months                                                                                                                            | 260 of 756 eligible people (34.4%)                                                                | Quality and Outcomes Framework, 2019-20: The percentage of patients with diabetes, on the register, without moderate or severe frailty in whom the last IFCC-HbA1c is 58 mmol/mol or less in the preceding 12 months                                                                                               | 56.66%(1)                           |
| Glycaemic control for diabetes with frailty: proportion of the prison population with diabetes and moderate or severe frailty, whose most recent HbA1c was $\leq$ 75 mmol/mol in the last 12 months                                                                                                                       | 9 of 14 eligible people (64.3%)                                                                   | Quality and Outcomes Framework, 2019-20: The percentage of patients with diabetes, on the register, with moderate or severe frailty in whom the last IFCC-HbA1c is 75 mmol/mol or less in the preceding 12 months                                                                                                  | 83.34%(1)                           |
| Asthma review: proportion of the prison population with asthma who had an asthma review in the last 12 months that included an assessment of asthma control                                                                                                                                                               | 136 of 4,459 eligible people (3.1%)                                                               | Quality and Outcomes Framework, 2019-20: The percentage of patients with asthma, on the register, who have had an asthma review in the preceding 12 months that includes an assessment of asthma control using the 3 Royal College of Physicians questions                                                         | 67.14%(1)                           |
| Epilepsy review and control: proportion of the prison population with epilepsy and prescribed antiepileptic drug(s), that had an annual review and were seizure free in the last 12 months                                                                                                                                | Annual review: 5 of 419 eligible people (1.2%)<br>Seizure free: 1 of 419 eligible people (<1.00%) | Quality and Outcomes Framework, 2013-14: The percentage of patients aged 18 or over on drug treatment for epilepsy who have been seizure free for the last 12 months, recorded in the preceding 12 months                                                                                                          | 57.50%(2)                           |
| Secondary prevention of stroke: proportion of the prison population with transient ischaemic attack or stroke (excluding haemorrhagic stroke), prescribed an antiplatelet/anticoagulant in the last 12 months                                                                                                             | 51 of 86 eligible people (59.3%)                                                                  | Quality and Outcomes Framework, 2019-20: The percentage of patients with a stroke shown to be non-haemorrhagic, or a history of transient ischaemic attack, who have a record in the preceding 12 months that an antiplatelet agent, or an anti-coagulant is being taken                                           | 91.01%(1)                           |
| Anticoagulation for atrial fibrillation: proportion of the prison population with persistent/paroxysmal atrial fibrillation and CHA2DS2-VASc score $\geq$ two, with a prescription for warfarin/direct-acting oral anticoagulant in the last 12 months                                                                    | 45 of 54 eligible people (83.3%)                                                                  | Quality and Outcomes Framework, 2019-20: In those patients with atrial fibrillation with a record of a CHA2DS2-VASc score of 2 or more, the percentage of patients who are currently treated with anti-coagulation drug therapy                                                                                    | 87.26%(1)                           |
| Stroke risk assessment in atrial fibrillation: proportion of the prison population with persistent/paroxysmal atrial fibrillation, and a CHA2DS2-VASc score in the last 12 months                                                                                                                                         | 15 of 25 eligible people (60%)                                                                    | Quality and Outcomes Framework, 2019-20: The percentage of patients with atrial fibrillation in whom stroke risk has been assessed using the CHA2DS2-VASc score risk stratification scoring system in the preceding 12 months (excluding those patients with a previous CHADS2 or CHA2DS2-VASc score of 2 or more) | 93.35%(1)                           |

| Study indicator                                                                                                                                                                                                                                                                                                                                          | Study achievement 2019-20 (%)        | Community indicator <sup>a</sup>                                                                                                                                                                                                                                                                                                                    | Community achievement (England) (%) |
|----------------------------------------------------------------------------------------------------------------------------------------------------------------------------------------------------------------------------------------------------------------------------------------------------------------------------------------------------------|--------------------------------------|-----------------------------------------------------------------------------------------------------------------------------------------------------------------------------------------------------------------------------------------------------------------------------------------------------------------------------------------------------|-------------------------------------|
| <b>Long-term conditions</b>                                                                                                                                                                                                                                                                                                                              |                                      |                                                                                                                                                                                                                                                                                                                                                     |                                     |
| Blood pressure control in people 79 years or under with cardiovascular disease: proportion of the prison population aged ≤ 79 years with coronary heart disease, hypertension, stroke, transient ischaemic attack or peripheral arterial disease, and without diabetes or chronic kidney disease, with blood pressure ≤ 140/90mmHg in the last 12 months | 586 of 1,311 eligible people (44.7%) | Quality and Outcomes Framework, 2019-20: The percentage of patients aged 79 years or under, with coronary heart disease, in whom the last blood pressure reading (measured in the preceding 12 months) is 140/90 mmHg or less                                                                                                                       | 77.77%(1)                           |
| Blood pressure control in people 80 years or over with cardiovascular disease: proportion of the prison population aged ≥ 80 years with coronary heart disease, hypertension, stroke, transient ischaemic attack or peripheral arterial disease, and without diabetes or chronic kidney disease, with blood pressure ≤ 150/90mmHg in the last 12 months  | 10 of 19 eligible people (52.6%)     | Quality and Outcomes Framework, 2019-20: The percentage of patients aged 80 years or over, with coronary heart disease, in whom the last blood pressure reading (measured in the preceding 12 months) is 150/90 mmHg or less                                                                                                                        | 86.50%(1)                           |
| Secondary prevention of myocardial infarction: proportion of the prison population with myocardial infarction, prescribed all of the following in the last 12 months: ACE-inhibitor/angiotensin receptor blocker, anti-platelet, beta-blocker and statin                                                                                                 | 0 of 492 eligible people (0%)        | Quality and Outcomes Framework, 2014-15: The percentage of patients with a history of myocardial infarction (on or after 1 April 2011) currently treated with an ACE-inhibitor (or angiotensin receptor blocker if ACE-inhibitor intolerant), aspirin or an alternative anti-platelet therapy, beta-blocker and statin                              | 69.06%(3)                           |
| Treatment of coronary heart disease: proportion of the prison population with coronary heart disease prescribed anti-platelet/anti-coagulant therapy in the last 12 months                                                                                                                                                                               | 360 of 494 eligible people (72.9%)   | Quality and Outcomes Framework, 2019-20: The percentage of patients with coronary heart disease with a record in the preceding 12 months that aspirin, an alternative anti-platelet therapy, or an anti-coagulant is being taken                                                                                                                    | 90.87%(1)                           |
| Treatment of heart failure: proportion of the prison population with heart failure, prescribed an ACE-inhibitor/angiotensin receptor blocker in the last 12 months                                                                                                                                                                                       | 62 of 98 eligible people (63.3%)     | Quality and Outcomes Framework, 2019-20: In those patients with a current diagnosis of heart failure due to left ventricular systolic dysfunction, the percentage of patients who are currently treated with an ACE-inhibitor or angiotensin receptor blocker                                                                                       | 81.95%(1)                           |
| Treatment of heart failure: proportion of the prison population with heart failure, prescribed an ACE-inhibitor/angiotensin receptor blocker and beta-blocker, in the last 12 months                                                                                                                                                                     | 49 of 61 eligible people (80.3%)     | Quality and Outcomes Framework, 2019-20: In those patients with a current diagnosis of heart failure due to left ventricular systolic dysfunction who are currently treated with an ACE-inhibitor or angiotensin receptor blocker, the percentage of patients who are additionally currently treated with a beta-blocker licensed for heart failure | 82.01%(1)                           |

| Study indicator                                                                                                                                                                                                                                                                                                                                                                                                                                                                                 | Study achievement 2019-20 (%)          | Community indicator <sup>a</sup>                                                                                                                                                                                                                                                                                                                                                                                                                                                                          | Community achievement (England) (%)                                                                                                     |
|-------------------------------------------------------------------------------------------------------------------------------------------------------------------------------------------------------------------------------------------------------------------------------------------------------------------------------------------------------------------------------------------------------------------------------------------------------------------------------------------------|----------------------------------------|-----------------------------------------------------------------------------------------------------------------------------------------------------------------------------------------------------------------------------------------------------------------------------------------------------------------------------------------------------------------------------------------------------------------------------------------------------------------------------------------------------------|-----------------------------------------------------------------------------------------------------------------------------------------|
| <b>Screening</b>                                                                                                                                                                                                                                                                                                                                                                                                                                                                                |                                        |                                                                                                                                                                                                                                                                                                                                                                                                                                                                                                           |                                                                                                                                         |
| Cervical screening age 25-49 years: proportion of women in prison eligible for cervical screening, aged 25-49 years, who had the test in the last three years and six months                                                                                                                                                                                                                                                                                                                    | 1,145 of 1,796 eligible people (63.8%) | Quality and Outcomes Framework, 2019-20: The percentage of women eligible for screening and aged 25-49 years whose notes record that an adequate cervical screening test has been performed in the preceding 3 years and 6 months                                                                                                                                                                                                                                                                         | 71.48%(1)                                                                                                                               |
| Cervical screening age 50-64 years: proportion of women in prison eligible for cervical screening, aged 50-64 years, who had the test in the last five years and six months                                                                                                                                                                                                                                                                                                                     | 159 of 259 eligible people (61.4%)     | Quality and Outcomes Framework, 2019-20: The percentage of women eligible for screening and aged 50-64 years whose notes record that an adequate cervical screening test has been performed in the preceding 5 years and 6 months                                                                                                                                                                                                                                                                         | 77.64%(1)                                                                                                                               |
| Breast screening: proportion of women in prison eligible for breast screening, aged 50-70 years, who had the test in the last three years                                                                                                                                                                                                                                                                                                                                                       | 59 of 179 eligible people (33%)        | Breast Screening Programme 2017-18: uptake of invitations to screen for women age 50-70 years                                                                                                                                                                                                                                                                                                                                                                                                             | 70.5%(4)                                                                                                                                |
| Abdominal aortic aneurysm screening: proportion of men in prison eligible for abdominal aortic aneurysm screening, aged $\geq 65$ years, who have had the test                                                                                                                                                                                                                                                                                                                                  | 241 of 540 eligible people (44.6%)     | Abdominal aortic aneurysm screening 2014-15: uptake for initial screens. Data are for men turning 65 in the screening year.                                                                                                                                                                                                                                                                                                                                                                               | 79.5%(5)                                                                                                                                |
| Cardiovascular disease risk assessment: proportion of the prison population aged 45 to 74 years with cardiovascular disease risk assessment in the last 5 years: People with diagnoses of: coronary heart disease, chronic kidney disease, diabetes, hypertension, atrial fibrillation, transient ischaemic attack, familial hypercholesterolemia, heart failure, peripheral arterial disease, stroke or $\geq 20\%$ 10-year cardiovascular disease risk before the last 5 years, were excluded | 353 of 1,183 eligible people (29.8%)   | People taking up an NHS Health Check invite per year, England, 2019-20. The NHS Health Check programme aims to help prevent heart disease, stroke, diabetes and kidney disease. Everyone between the ages of 40 and 74, who has not already been diagnosed with one of these conditions, will be invited (once every five years) to have a check to assess their risk of heart disease, stroke, kidney disease and diabetes and will be given support and advice to help them reduce or manage that risk. | 43.7%(6)                                                                                                                                |
| <b>Mental illness</b>                                                                                                                                                                                                                                                                                                                                                                                                                                                                           |                                        |                                                                                                                                                                                                                                                                                                                                                                                                                                                                                                           |                                                                                                                                         |
| Antipsychotic monitoring: proportion of the prison population with $\geq$ three prescriptions for a first or second generation antipsychotic drug, and $\geq$ five of these measurements in the preceding 12 months: body mass index, blood pressure, blood tests for fasting glucose and/or HbA1c, lipid profile, renal and liver function, full blood count                                                                                                                                   | 24 of 463 eligible people (5.2%)       | Quality and Outcomes Framework, 2019-20: The percentage of patients with schizophrenia, bipolar affective disorder and other psychoses who have a record of blood pressure and body mass index in the preceding 12 months                                                                                                                                                                                                                                                                                 | 80.28% blood pressure<br>74.40% body mass index(1)                                                                                      |
| Diagnosis of dementia: proportion of the prison population with a new diagnosis of any form of dementia, and a record of $\geq$ five of these blood tests 12 months before to 6 months after date of diagnosis: full blood count, calcium, glucose and/or HbA1C, renal and liver function, thyroid function, vitamin B12, folate                                                                                                                                                                | 6 of 13 eligible people (46.2%)        | Quality and Outcomes Framework, 2018-19: The percentage of patients with a new diagnosis of dementia recorded in the preceding 1 April to 31 March with a record of full blood count, calcium, glucose, renal and liver function, thyroid function tests, serum vitamin B12 and folate levels recorded between 12 months before or 6 months after entering on to the register                                                                                                                             | 70.01%(7)                                                                                                                               |
| <b>Communicable disease</b>                                                                                                                                                                                                                                                                                                                                                                                                                                                                     |                                        |                                                                                                                                                                                                                                                                                                                                                                                                                                                                                                           |                                                                                                                                         |
| Influenza immunisation: proportion of the prison population with one or more of: coronary heart disease, stroke, transient ischemic attack, diabetes or chronic obstructive pulmonary disease, who received an influenza vaccination August to March                                                                                                                                                                                                                                            | 787 of 1,752 eligible people (44.9%)   | Quality and Outcomes Framework, 2019-20: The percentage of patients who have had influenza immunisation in the preceding 1 August to 31 March                                                                                                                                                                                                                                                                                                                                                             | 72.22% diabetes<br>74.22 transient ischaemic attack<br>77.33% coronary heart disease<br>77.44% chronic obstructive pulmonary disease(1) |

| Study indicator                                                                                                            | Study achievement 2019-20 (%)           | Community indicator <sup>a</sup>                                                                                                                                                                                                                                                                 | Community achievement (England) (%)                                                                                               |
|----------------------------------------------------------------------------------------------------------------------------|-----------------------------------------|--------------------------------------------------------------------------------------------------------------------------------------------------------------------------------------------------------------------------------------------------------------------------------------------------|-----------------------------------------------------------------------------------------------------------------------------------|
| <b>Opioid and gabapentinoid prescribing</b>                                                                                |                                         |                                                                                                                                                                                                                                                                                                  |                                                                                                                                   |
| Prescribed any opioid: proportion of the prison population prescribed any opioid during an eight-week period               | 2,957 of 25,811 eligible people (11.5%) | A record of four or more opioid prescriptions 2011-12                                                                                                                                                                                                                                            | 12.4%(8) <sup>b</sup><br><br>Long-term prescribing was associated with mental health problems (odds ratio 1.12, 1.03 to 1.23)     |
| Prescribed any strong opioid: proportion of the prison population prescribed any strong opioid during an eight-week period | 2,257 of 25,811 eligible people (8.7%)  | A record of four or more opioid prescriptions 2011-12, and at least one prescription of a strong opioid at any time point (diamorphine, morphine, oxycodone, fentanyl, hydromorphone, buprenorphine (excluding preparations used for substance misuse), pentazocine, dipipanone and papaveretum) | 0.85%(8) <sup>b</sup><br><br>Strong opioid prescribing was associated with mental health problems (odds ratio 1.23, 1.06 to 1.23) |

<sup>a</sup> We used results from comparable quality indicators employed in the community and public health data. Data from 2019-20 were used where available, corresponding to the final year of data collection in the study.

<sup>b</sup> Data from West Yorkshire, England.

1. NHS Digital. Quality and Outcomes Framework 2019-20: Prevalence, achievement and personalised care adjustments at regional and national level, 2020 [26 January 2023]. Available from: <https://digital.nhs.uk/data-and-information/publications/statistical/quality-and-outcomes-framework-achievement-prevalence-and-exceptions-data/2019-20>.
2. NHS Digital. Quality and Outcomes Framework (QOF) - 2013-14: Prevalence, achievements and exceptions at region and nation level for England, 2014 [26 January 2023]. Available from: <https://digital.nhs.uk/data-and-information/publications/statistical/quality-and-outcomes-framework-achievement-prevalence-and-exceptions-data/quality-and-outcomes-framework-qof-2013-14>.
3. NHS Digital. Quality and Outcomes Framework (QOF) - 2014-15: Prevalence, achievements and exceptions at region and nation level V1.1, 2015 [26 January 2023]. Available from: <https://digital.nhs.uk/data-and-information/publications/statistical/quality-and-outcomes-framework-achievement-prevalence-and-exceptions-data/quality-and-outcomes-framework-qof-2014-15>.
4. NHS Digital. Breast Screening Programme, England 2017-18: Data tables, 2018 [26 January 2023]. Available from: <https://digital.nhs.uk/data-and-information/publications/statistical/breast-screening-programme/england-2017-18>.
5. Public Health England. Research and analysis. Abdominal aortic aneurysm screening: 2014 to 2015 data tables, 2015 [26 January 2023]. Available from: <https://www.gov.uk/government/publications/abdominal-aortic-aneurysm-screening-2014-to-2015-data>.
6. Office for Health Improvement & Disparities. Finger Tips Public Health Data. NHS Health Check: People taking up an NHS Health Check invite per year, 2020 [26 January 2023]. Available from: <https://fingertips.phe.org.uk/profile/nhs-health-check-detailed/data#page/4/gid/1938132726/pat/159/par/K02000001/ati/15/are/E92000001/iid/91112/age/219/sex/4/cat/-1/ctp/-1/yr/5/cid/4/tbm/1>.
7. NHS Digital. Quality and Outcomes Framework 2018-19: Prevalence, achievements and exceptions at regional and national level, 2019 [26 January 2023]. Available from: <https://digital.nhs.uk/data-and-information/publications/statistical/quality-and-outcomes-framework-achievement-prevalence-and-exceptions-data/2018-19-pas>.
8. Foy R, Leaman B, McCrorie C, et al. Prescribed opioids in primary care: cross-sectional and longitudinal analyses of influence of patient and practice characteristics. *BMJ Open*. 2016;6(5):e010276.
